# Supplementary material
Source: PubMed Central journal article supplement (PMC3443900)

# THE LANCET

## Supplementary appendix

This appendix formed part of the original submission and has been peer reviewed. We post it as supplied by the authors.

Supplement to: Stevens GA, Finucane MM, Paciorek CJ, et al on behalf of Nutrition Impact Model Study Group (Child Growth). Trends in mild, moderate, and severe stunting and underweight, and progress towards MDG 1 in 141 developing countries: a systematic analysis of population representative data. *Lancet* 2012; published online July 5. [http://dx.doi.org/10.1016/S0140-6736\(12\)60647-3](http://dx.doi.org/10.1016/S0140-6736(12)60647-3).

## Appendix 1. Data identification, access and inclusion

Child anthropometry (height and weight) may be used as indicators of nutritional status. Because childhood is a time of rapid development, a child's height and weight are not meaningful in isolation from other children of the same age group. Rather, they must be evaluated by comparing to the height and weight in a well-nourished reference population of the same age. This comparison is done by calculating each child's relative position in the reference population distribution, using a metric such as  $z$ -score.  $Z$ -score is the difference between the child's height/weight and the mean height/weight of the reference population, divided by the standard deviation of height/weight in that reference population. In this study, we evaluated height-for-age  $z$ -scores (HAZ) and weight-for-age  $z$ -scores (WAZ). We used the WHO growth standards ("WHO standards"), which were introduced in 2006 based on a multi-country study of child growth potential.<sup>1</sup> The basis for these standards are described in detail elsewhere.<sup>1</sup> In brief, the WHO carried out the Multicentre Growth Reference Study to evaluate the growth patterns of healthy, breastfed children in 6 countries (Brazil, Ghana, India, Norway, Oman, and USA). Based on this study, the WHO concluded that well-nourished children in all populations have similar growth potential, which was reflected in the WHO standards.

Our search for data was designed to obtain as many population-based data sources as possible. Some of these sources had used an older reference population, namely the 1977 WHO/NCHS reference population ("NCHS reference").<sup>2</sup> They were included and systematically converted to the WHO standards, as described in Appendix 2.

We accessed data in two forms: 1) anonymised individual-level data when accessible to the authors, and 2) summary statistics, including mean  $Z$ -score and prevalences below specific thresholds. We manually identified and removed duplicated data accessed from more than one source, including individual-level data if available, or if not, data analysed using the WHO standards. Our last update date was in the first quarter of 2012.

We included data sources on child anthropometry if:

- data were based on measured weight and length or height;
- Data were representative of an area that was a first-administrative unit (e.g., a province or state) or larger;
- a probabilistic sampling method with a defined sampling frame was used; or the data were from surveillance systems that either had a representative sample of facilities or gathered data from every facility in areas where more than 60% of children lived;
- individual record data on height or weight and child age were available for children under five years of age; or HAZ and WAZ summary statistics were reported for children under five years of age calculated using the 2006 WHO standards or the NCHS reference (see below for more details);
- sample size of the survey or study was at least 100 children if individual record data were available or 400 children if data were provided as summary statistics;
- data were collected in or after 1985; and
- data were from the 141 countries listed in Webtable 1.

### 1.1 Individual-level data

We obtained anonymised individual-level data from health-examination surveys and household surveys with anthropometric measurements. Most of these sources were multi-country surveys including the Demographic and Health Surveys (DHS), Multiple Indicator Cluster Surveys (MICS), Pan Arab Project for Child

Development (PAPCHILD) surveys, and the Reproductive Health Surveys (RHS). We also searched websites that archive survey data for health examination surveys that fulfilled our inclusion criteria; the websites included the Inter-University Consortium for Political and Social Research (ICPSR), the Institute for Health Metrics and Evaluation's Global Health Data Exchange (GHDx), the RAND corporation, and selected national health statistics departments. Finally, we used health examination survey data available to the authors through the Global Burden of Metabolic Risk Factors of Chronic Diseases Collaborating Group.<sup>3,4,5,6</sup> From each survey, we extracted the following variables for all children under five years of age: age, sex, height, weight, urban or rural residence, and survey sample weight, stratum, and sampling unit.

We calculated HAZ and WAZ in reference to the WHO standards using the Stata macro associated with the WHO Anthro Software, available at [www.who.int/childgrowth/software/](http://www.who.int/childgrowth/software/). Consistent with the WHO Anthro Software and the WHO Global Database on Child Growth and Malnutrition, the following z-scores were considered biologically implausible and excluded: HAZ < -6 or > 6 (1.6% of data) and WAZ < -6 or > 5 (0.5% of data) ([www.who.int/childgrowth/software/anthro\\_pc\\_manual\\_v322.pdf](http://www.who.int/childgrowth/software/anthro_pc_manual_v322.pdf)). We excluded four surveys because more than 30% of height or weight values were above or below levels that are considered biologically implausible using the WHO standards; this was deemed to be a result of survey implementation or quality problems. These surveys were Nigeria DHS 1999, Zambia MICS 2, Yemen DHS 1991, and Maldives DHS 2009. We accessed and excluded two surveys which reported child age in years rather than months: Thailand National Health Examination Survey 1 and Mexico Family Life Survey 1. We excluded weight data, but used height data, from Egypt DHS 2000 due to concerns about validity of weight measurement.

## 1.2 Data accessed as summary statistics

WHO maintains a database on child anthropometric indicators, described in detail elsewhere.<sup>7</sup> Briefly, data are identified via a weekly MEDLINE search and a network of international collaborators. Studies are included if there is a defined population-based sampling frame; a probabilistic sampling procedure is used; sample size is at least 400 children; and standard anthropometric measurement techniques are used. In exceptional cases, data from high-quality national nutritional surveillance systems are also included.

Before the introduction of the WHO standards in 2006, data provided as summary statistics were extracted into the WHO database on child anthropometric indicators only if they had used the NCHS reference. From 2006, data provided as summary statistics were extracted only included if they were analyzed in relation to the WHO standards.

We accessed and further screened these summary data, regardless of the standard population (i.e. whether calculated according to the NCHS reference or the WHO standards). We converted all data to a single reference population as described in Webappendix 2.

Consistent with our inclusion and exclusion criteria and to ensure each data source was used only once, we excluded data sources if:

- data were based on weight and length or height reported by caretaker;
- they were collected prior to 1985 or in a country or territory not listed in Webtable 1;
- we had access to the same data as individual-level data;
- they were not representative of the general population (e.g., were from refugees, or an exclusively urban or rural population). The exception was 6 years of data from Helen Keller International in rural Bangladesh. These data were from large, high-quality surveys in years before the first Bangladesh Demographic and Health Survey was conducted and when the population of Bangladesh was 77.9-79.8% rural;

- they used a facility-based surveillance method that did not meet our inclusion criteria for surveillance data;
- they were representative of communities smaller than a first-administrative unit; or
- they included children older than five years of age without providing data in smaller age bands.

In some cases, the sample size recorded in the database was calculated as the actual survey sample size weighted by sample weights, leading to implausibly large sample sizes. We checked all data sources with recorded sample sizes greater than 15,000 and corrected the sample sizes where this had occurred. If we could not find any information on the sample size, we conservatively used a sample size of 400.

We extracted additional data from preliminary DHS and MICS reports for surveys that were neither available as individual-level data nor as summary statistics in the WHO database on child anthropometric indicators. We included one additional data source from a country report that could not be included in the WHO growth database because it was reported using the NCHS reference (South Africa National Food Consumption Survey, 2005).

As described in the main paper, we made estimates for all children under five years of age for both sexes combined. Some sources reported summary statistics by sex and for narrow age groups, e.g. those that were in 6 or 12 month increments. For these sources, we calculated combined (both sexes and all under-five ages) values by weighting the age-sex-specific ones by sex-specific sample sizes and age-specific populations.

## Appendix 2. Methods for converting summary statistics based on the 1977 WHO/NCHS reference population to the 2006 WHO child growth standards

When individual-level data were available us,  $z$ -scores were calculated using WHO child growth standards.

For data available as summary statistics, when possible, requests were made for individual-level re-analysis using the WHO standards. As described in Appendix 1.2, some summary statistics were reported relative to the NCHS reference (11% of all country-years included in the study). To use these data and ensure comparability of the reference population, summary statistics (mean  $z$ -score and proportions below specific  $z$ -scores) based on the NCHS reference were converted to those based on the WHO standards using a regression analysis that related the two.

Yang and de Onis<sup>8</sup> developed such models, for the complete age range between 0 and 59 months of age. These had been applied to 132 data sources before they were entered into the WHO database on child anthropometric indicators. The converted values were extracted for this study.

For another 89 sources for which means and prevalences based on the NCHS reference were available to us, we extended the above approach by generating similar regression models for narrower age groups because many sources had provided age-specific data and the relationship between the two reference populations varies by age.<sup>9</sup> Specifically, we pooled individual-level data from 159 DHS surveys with child anthropometry,  $z$ -scores according to the NCHS reference (as provided in the data file) and the WHO standards (calculated as above for this study), and related the former to the latter in a series of regressions.

We developed regressions for each age range in the database (33 age ranges in total), indicator (HAZ, WAZ), and metric (mean, prevalence below -2 standard deviations, and prevalence below -3 standard deviations), yielding a total of 198 regression equations. The cross-walking relationship was used to predict the latter when only the former was available.

We used linear ordinary least squares regressions for converting means and prevalences. Each regression for converting mean  $z$ -scores had the following form:

$$\mu_{WHO} = \beta \cdot \mu_{NCHS} + \alpha$$

For prevalences, we regressed the logits of the dependent and independent variables as follows:

$$\text{logit}(P_{WHO}) = \beta \cdot \text{logit}(P_{NCHS}) + \alpha$$

For some age-ranges and prevalences, the fit of the regression was poor ( $R^2 < 0.7$ ). To improve prediction, we reran the regression without the logit transformations, which resulted in improved model fit represented by a higher  $R^2$  value (Webfigure 1). These regressions had the following form:

$$P_{WHO} = \beta \cdot P_{NCHS} + \alpha$$

The additional uncertainty due to cross-walking due to cross-walking from the NCHS reference to the WHO standards can be quantified as the prediction variance in the cross-walking regression fit using surveys with large sample sizes (statistical derivation not shown). We calculated prediction variances from cross-walking regressions for the full 0-59-month age range (vs. for the separate regressions for each age group). This uncertainty is affected by both the residual variance of the regression and by the uncertainty of regression parameters, with most of the uncertainty in the cross-walking regressions related to the former component. For this reason, we approximated the component related to regression parameters (i.e., the smaller component) as the average for all the data used to fit the regressions even though it varies based on the actual level of the independent variable. Additionally, because the regressions for prevalences were fitted on the logit scale, we used the delta method to approximate the prediction variance on the prevalence scale. The additional variance from cross-walking was added to the sampling variance for studies using the NCHS reference in the likelihood of the Bayesian hierarchical mixture model.

### Appendix 3. Accounting for complex survey design

As described in the main paper and Appendix 4, our statistical model used individual-level data when available and summary statistics when not to estimate the full distributions of HAZ and WAZ by country and year.

All of the individual-level data in our analysis came from surveys that used complex survey designs. Specifically, in designing a representative survey, the target populations were usually divided into strata based on geographical regions within the country, whether place of residence was rural or urban, and/or the socioeconomic characteristics of the place of residence; within each stratum, a number of clusters were randomly selected. Clusters may be villages, administrative units, or census units. Households or participants were then randomly sampled within each cluster. Because total population may differ among strata and clusters, individuals or households in smaller units have a higher probability of being selected than those in larger units. To account for the differences in probability of being sampled, each observation is assigned a sample weight. These weights are calculated to make the survey data representative of the total population.

An implication of the sampling method is that the so-called effective sample size of the survey (ESS) is different from its actual sample size. This occurs primarily because the sampled individuals are from a clusters that are representative but do not cover the entire country, and hence contain less information than they would, had they been a true random sample of the population.

To reflect the true availability of information in each survey and in the individual level data that it provided to the statistical model, we estimated ESS using the *estat effects* command of the Stata version 10.1 *svy* suite of commands (StataCorp, 2009). This command generates the design effect (DEFF), which is the ratio between the (usually smaller) effective sample size and real sample size, e.g. a survey with 1000 subjects with a DEFF of 2.0 has an ESS of 500.

The DEFF may differ for different nutritional indicators (HAZ, WAZ) and for different summary statistic metrics (mean vs. prevalence below -2 SD vs. prevalence below -3 SD) depending on how these indicators, and the metrics are distributed across the strata and clusters. We calculated DEFF separately by nutritional indicator. For each survey, we calculated the DEFF as the median of those from a range of metrics, specifically, prevalence below  $-4, -3.5, -3.0, \dots, -1.0, -0.5, 0, 0.5, 1.0, \dots, 3, 3.5, 4$   $z$ -scores, and nutritional indicators.

Once we had calculated an ESS  $n$  for a survey (using the median DEFF as described above), we took  $n$  randomly selected observations from the survey, sampling with replacement and with each observation having the probability of being selected proportional to its sample weight. The result was  $n$  observations from the survey which could be treated as a simple random sample in terms of their representativeness and their true information content as measured by ESS.

Sample sizes recorded for data sources in the WHO database on child growth are actual sample sizes and not the effective sample sizes. To ensure that the sample sizes used for these sources also reflect the complex survey design, ESS should be calculated. Calculating the latter requires individual-level data, which by definition is not available for data sources that only reported summary statistics. Therefore, we applied the median DEFF from all surveys with individual-level data to this group.

## Appendix 4. Bayesian hierarchical mixture model

We estimate the complete distributions of HAZ and WAZ, taking a total-population (vs. high-risk-only) approach to risk factors. This approach allows making coherent inference on mean HAZ/WAZ and on the prevalences of stunting/underweight at all levels of severity (i.e, mild, moderate, and severe).

The population distributions of  $z$ -scores may be only approximately normal. Due to latent sub-populations, for example, the distributions may be skewed or, at the extreme, even multimodal. We therefore choose a flexible approach that avoids treating the relationship between means and prevalences as coming from a pre-specified parametric family.

In this Section, we describe the Bayesian hierarchical finite mixture model used for this purpose. We first explain how we estimate HAZ and WAZ distributions when individual-level data are available. We then describe the extension that allows us to include aggregated summary statistics such as sample means and prevalences when individual-level data are unavailable. Finally, we briefly describe our computational and inferential approaches.

For both HAZ and WAZ, we let  $f_i(z)$  denote the distribution of  $z$ -scores in study  $i$  ( $i = 1, \dots, n$ ) in country  $j[i]$  ( $j = 1, \dots, J$ ). Following Rodriguez et al.<sup>10</sup>, we set:

$$f_i(z) = \sum_{m=1}^{M+1} w_{mi} \mathcal{N}(z | \theta_m, \sigma_m^2) \quad (1)$$

$$w_{mi} = \begin{cases} \Phi(\alpha_{mi}) \prod_{u=1}^{m-1} (1 - \Phi(\alpha_{ui})) & \text{if } m \leq M \\ \prod_{u=1}^M (1 - \Phi(\alpha_{ui})) & \text{if } m = M + 1 \end{cases} \quad (2)$$

$$\alpha_{mi} = \delta_{mj[i]}^c + (\varphi\delta^c)_{mj[i]t_i} + u_{mj[i]t_i} + \beta_m x_i + a_{mi} + b_{mi}. \quad (3)$$

Equation 1 describes a finite mixture of  $M + 1$  normal ( $\mathcal{N}$ ) distributions (or mixture components), where the weights ( $w$ ) on the constituent normal distributions vary across studies. We specify a probit stick-breaking model for the  $w$ 's in equation 2. This transformation uses the standard normal cumulative distribution function ( $\Phi$ ) to transform  $\alpha$ 's that range between  $-\infty$  and  $\infty$  to  $w$ 's that range between 0 and 1. Specifically, the  $\alpha$ 's determine the relative weights assigned to each mixture component in the following manner: starting with a 'stick' of length one,  $\Phi(\alpha_{1i})$  is the proportion of the stick that we break off and assign to  $w_{1i}$ ;  $\Phi(\alpha_{2i})$  is the proportion of the remaining stick of length  $(1 - w_{1i})$  that we break off and allocate to  $w_{2i}$ ; and so on. Larger values of  $\alpha_{mi}$  thus correspond to higher weights on the  $m^{\text{th}}$  mixture component in study  $i$ . The probit stick-breaking transformation therefore allows us to place a flexible model on the  $\alpha$ 's, while ensuring that the  $w$ 's still add to one, in such a way that large mass in one part of the HAZ or WAZ distribution is balanced by smaller mass in others parts, and vice versa, through exchanges among the constituent mixture components.

In equation 3, we define  $\alpha_{mi}$  to be comprised of six effects that allow us to leverage all available information in making estimates for each country-year pair.  $\delta_{mj}^c$  is a country-by-component interaction term, determining the baseline weight placed on each of the  $M + 1$  normal distributions in country  $j$ .  $(\gamma\delta^c)_{mj}$  is a country- and component-specific linear time effect, determining the linear parts of country  $j$ 's time trend. The hierarchical prior for  $\delta^c$  and  $(\gamma\delta)^c$  is described in Section 4.1. Letting  $T = 27$  be the total number of time-points of interest (1985, 1986,  $\dots$ , 2011), the  $T$ -vector  $u_{mj}$  captures smooth nonlinear change over time in country  $j$  and mixture component  $m$ , with details provided in Section 4.2.  $\beta_m$  are the effects of time-varying country-level covariates  $x$  (maternal education, national income, urbanization, and an aggregate metric of access to basic healthcare, as described in the main paper) in mixture component  $m$ . The  $a$ 's are study-specific random effects, and the  $b$ 's capture the extra variance of studies that do not cover 0-59 months of age. These error terms and their variances are described in Section 4.3.

In this analysis, we use  $M + 1 = 5$  mixture components. We tested the sensitivity of our inference to the inclusion of two additional mixture components and found that a 7-component model yields similar results (Webtable 5). This finding is consistent with the assertion of Rodriguez et al.<sup>10</sup> that “finite mixtures of a moderate number of Gaussians can produce an accurate approximation of any smooth density”.

#### 4.1 Hierarchical intercepts and linear time slopes

The data have a hierarchical structure: studies are nested in countries, which are nested in regions (indexed by  $k$ ), which are, of course, all nested in the globe. For each mixture component, we specify hierarchical priors for the country-specific random intercepts ( $\delta^c$ ) and the country-specific linear time slopes ( $\gamma\delta^c$ ) as in previous global analyses with similar data structures.<sup>3,4,5,6</sup> For both the random intercepts and the random time slopes, we use a fat-tailed  $t_4$  prior at the country level to allow for the fact that some countries may deviate substantially from their expected values given covariates and geographic hierarchy:

$$\begin{aligned}\delta_{mj}^c &\sim t_4\left(\delta_{mk[j]}^r, \tau_m^{\delta^c}\right) \\ \delta_{mk}^r &\sim \mathcal{N}\left(\delta_m^g, \tau_m^{\delta^r}\right) \\ (\gamma\delta^c)_{mj} &\sim t_4\left((\gamma\delta^r)_{mk[j]}, \tau_m^{\gamma\delta^c}\right) \\ (\gamma\delta^r)_{mk} &\sim \mathcal{N}\left((\gamma\delta^g)_m, \tau_m^{\gamma\delta^r}\right).\end{aligned}$$

This specification allows us to borrow strength across units, compromising between the overly-noisy unit-specific estimate and the overly-simplified all-unit estimate.<sup>11</sup> The model performs a greater degree of pooling in units where the data are nonexistent or noninformative (i.e., have large uncertainty) and a lesser degree in data-rich units. Since there are country-years without data, we benefit especially from the ability to pool completely, partially, or not at all, according to the availability and informativeness of the data.

#### 4.2 Nonlinear change in time

HAZ and WAZ are expected to change smoothly over time. In country  $j$  and mixture component  $m$ , we capture smooth nonlinear change in time using the  $T$ -vector  $u_{mj}$ . We model  $u$  hierarchically by defining it as the sum of country, region, and global components:

$$u_{mj} = u_{mj}^c + u_{mk[j]}^r + u_m^g.$$

In order to allow the model to differentiate among the degrees of nonlinearity that exist at the country, region, and global levels, we assign each of  $u$ 's three components a Gaussian autoregressive prior,<sup>12,13</sup> as used to model hierarchical, non-linear trends in previous analyses.<sup>3,4,5,6</sup> The fitted time effects strike a balance between the variability of the data and the smoothing specified through the prior.

The  $T$ -vectors  $u_{mj}^c$ ,  $u_{mk}^r$ , and  $u_m^g$  each have a normal prior with mean zero and precision  $\lambda_m^c P$ ,  $\lambda_m^r P$ , and  $\lambda_m^g P$  respectively, where the scaled precision matrix  $P$  penalizes first and second differences to achieve the expected smooth change over time. The empirically-estimated precision parameters  $\lambda_m^c$ ,  $\lambda_m^r$ , and  $\lambda_m^g$ ,  $m = 1, \dots, M$ , multiply  $P$ , thus up-weighting or down-weighting the strength of its penalties and ultimately determining the degree of smoothing at each level, based on evidence available in the data. For each of the precision parameters, we use a truncated flat prior on the standard deviation scale ( $1/\sqrt{\lambda}$ ) as recommended by Gelman<sup>14</sup>. We truncate these priors such that  $\log\lambda \leq 12$  for each  $\lambda$ . This upper bound is enforced as a computational convenience: models with  $\log\lambda > 12$  are considered to be equivalent to a model with



$\log \lambda = 12$  as they have essentially no extra-linear variability in time. Furthermore, we order the  $\lambda$ 's a priori:  $\lambda_m^c < \lambda_m^r < \lambda_m^g$  for  $m = 1, \dots, M$ . This prior constraint conveys the natural expectation that, for example, the global HAZ trend has less extra-linear variability (a.k.a. ‘wiggleness’) than the trend of any given region. Further technical and computational details are given in Finucane et al.<sup>3</sup>, Danaei et al.<sup>4,5</sup>, and Farzadfar et al.<sup>6</sup>.

### 4.3 Error terms

The study-specific random effect  $a_{mi}$  allows mixture component  $m$  in study  $i$  to have an unusually high or an unusually low mixture weight after accounting for the other terms in the model. We assign a fat-tailed  $t_4$  prior to the  $a$ 's to account for the fact that some unusual studies may deviate substantially from their expected country-year mean:  $a_{mi} \sim t_4(0, v_{mi})$ . The scale parameter,  $v_{mi}$ , depends on whether the study is national or subnational:

$$v_{mi} = \begin{cases} v_m^n & \text{if study } i \text{ is nationally representative} \\ v_m^s & \text{otherwise.} \end{cases}$$

We include random effects for nationally-representative studies to capture the fact that even after accounting for sampling variability, a nationally-representative study may still not reflect its country's HAZ/WAZ distribution with complete accuracy, due to unobserved study design and measurement factors. The  $v_m^n, m = 1, \dots, M$  terms are estimated conditional on the hierarchically-structured country-level intercepts and time trends and on covariate effects, both of which are informed by all studies. These terms are therefore able to account for non-sampling ‘noise’ issues due to study design and quality in the context of the ‘signal’ in the rest of the data and model.

Random effects from nationally-representative studies are constrained to have less variability than random effects from other studies ( $v_m^n < v_m^s$  for  $m = 1, \dots, M$ ). Thus the random effects for non-nationally-representative studies account for both the non-sampling errors mentioned above and for within-country heterogeneity.

For studies that do not cover 0-59 months of age, we include an additional error term for each mixture component to capture variability of HAZ/WAZ distributions across ages, specified as a  $b_{mi} \sim t_4(0, v_m^c)$ . For studies that do cover the full age range, we set  $b_{mi} = 0$  for  $m = 1, \dots, M$ .

Note that to make country-level predictions, we set  $a = b = 0$ , thus removing the random effects due to imperfections in study design and to within-country and across-age variability of HAZ/WAZ distributions.

### 4.4 The full likelihood of individual-level data and summary statistics

As described in the main paper, data are available to us in two forms: individual-level records from some sources and aggregated summary statistics from studies whose individual-level data are not available. Our model incorporates both individual-level data and aggregated summary statistics as follows.

We write  $z = \{z_{\text{agg}}, z_{\text{ind}}\}$ , where  $z_{\text{agg}}$  is the aggregated data, and  $z_{\text{ind}}$  is the individual-level data whose likelihood is given in Equation 1. As described in Equation 3, the mixture weights are a function of mixture component, study, country, time, and covariate effects. We use  $\phi$  to denote the vector containing all these effects:  $\phi = \{\delta^c, (\varphi\delta^c), \beta, u, a, b\}$ . Let  $\Omega = \{\theta, \sigma^2, \phi, \tau^2, \lambda, v\}$  denote the vector of all model parameters. The full joint posterior for the individual-level and aggregated data is then given by:

$$\begin{aligned} P(\Omega|z) &\propto P(z|\Omega) P(\Omega) \\ &= P(z_{\text{agg}}|\Omega) P(z_{\text{ind}}|\Omega) P(\Omega) \\ &= P(z_{\text{agg}}|\theta, \sigma^2, \phi) P(z_{\text{ind}}|\theta, \sigma^2, \phi) P(\theta, \sigma^2) P(\phi|\tau^2, \lambda, v) P(\tau^2, \lambda, v). \end{aligned}$$

The premise of this unified specification is that the likelihood for both the aggregated and the individual-level data can be written as a function of a common set of parameters. In particular, since both sample means and sample prevalences are defined as the sum of a large number of independent random variables, we can use the multivariate central limit theorem to obtain a joint normal likelihood for the summary statistics as a function of the individual-level-data model parameters. Importantly, this specification accounts for dependence across multiple summaries reported for a single study sample, e.g. a sample’s mean and one or more of its sample prevalences. For aggregated-data studies using the NCHS reference, this specification also allows us to account for additional uncertainty due to cross-walking as described in Appendix 2. We then assign the shared parameters  $\{\theta, \sigma, \phi\}$  priors as described above, factor the likelihood into two pieces, and multiply to obtain a single coherent posterior.

## 4.5 Computation and inference

We fitted the model via Markov chain Monte Carlo (MCMC), programming the sampler using the statistical computing language R.<sup>15</sup> For each model, we started five chains in parallel at randomly-selected starting values. After a burn-in of 22,000 iterations for HAZ and of 30,000 iterations for WAZ, we ran each chain for 30,000 more iterations. We then combined the five chains and thinned by a factor of 30 to obtain chains of length 5,000 with which to generate results. We implemented an adaptive Metropolis within Gibbs algorithm due to Shaby and Wells<sup>16</sup> that tunes proposal covariances automatically to mimic scaled posterior covariances and that scales adapted proposal covariance matrices to obtain theoretically-optimal acceptance rates.

At each iteration  $i$  of the MCMC we drew a predicted  $\alpha$  from Equation 3, setting  $a = b = 0$ , as described above. We transformed this  $\alpha$  draw into a set of predicted mixture weights  $w$  via Equation 2. These weights were then combined with the values of  $\{\theta, \sigma\}$  from iteration  $i$  to yield a predicted HAZ/WAZ distribution. To make estimates at the region and global levels for a given year, we calculated population-weighted averages of each region’s constituent country-level values. The 95% uncertainty intervals were calculated as the 2.5th-97.5th percentiles of the predicted distributions across all iterations.

## Appendix 5. External predictive validity and sensitivity of estimates

We assessed the external (out-of-sample) predictive validity of our estimates, including in comparison with alternative models, and we examined their sensitivity to key modelling choices.

To assess the external predictive validity of our estimates, we conducted two tests. In Test 1, we held out all data from 10% of countries with data (i.e., created the appearance of countries with no data where we actually had data), with held-out data from a mix of countries that were data rich ( $\geq 6$  years of data with at least one year of data after 1999), data poor ( $\leq 3$  years of data), and that had average data density (4-5 years or  $\geq 6$  years of data with no data after 1999). We fitted the model to the data from the remaining 90% of countries and made estimates of the held-out observations. We calculated the absolute and relative differences between our estimates and the held-out data for (i) our main model, (ii) a model with no covariates and (iii) a model that made separate estimates for mean and prevalences without sharing information across them in the form of a distribution.

The hold-out algorithm for Test 2 was designed to assess external predictive validity for other patterns of missingness. In this test, we held out 10% of our data sources, with data again held out from a mix of data-rich, data-poor, and average-data-density countries, as defined above. For a given country, we either held out (a) a random one third of the country's data, (b) all of the country's 2000-2011 data (i.e., created the appearance of no recent data), or (c) all of the country's data (as in Test 1 but affecting a smaller number of countries). Our goals were to determine, respectively, how well we filled in the gaps for countries with intermittent data and how well we estimated in countries without recent data or without data. In addition to these 10% of data sources, for some countries with data on mean as well as prevalences below -2 and -3, we maintained prevalence  $< -2$  and held out one or both of the other two metrics. We did this to examine how well the model predicted mean and prevalence  $< -3$  when only prevalence  $< -2$  was available, as commonly occurred. We fitted the model to the remaining 90% of the dataset and made estimates of the held-out observations.

In both tests, we examined the validity of the main model's estimates and their 95% uncertainty intervals; in a model with good external predictive validity, 95% of held-out values would be included in the 95% uncertainty intervals. We assessed performance across all held-out observations as well as for subsets based on region, year of data, and how data were held out (see above). We repeated both tests five times, each time holding out a distinct set of countries (Test 1) or observations (Test 2). In addition to external predictive validity tests, we assessed the extent to which our estimates changed across these 3 models and in a model that used 7 (vs. 5) Normal distributions in the mixture.

In most comparisons, the main model had the same or better absolute and relative out-of-sample error than (a) a similar model without covariates, and (b) a trio of models that estimated each metric (mean and prevalences  $< -2$  and  $< -3$ ) separately (Webtable 3). Importantly, the main model had lower error than the trio of separate models in predicting held-out mean and prevalence  $< -3$  (the more-commonly missing indicators) when prevalence below -2 was observed. This advantage arises because, by estimating the whole distribution, the mixture model leverages the information contained in one metric to make estimates for another metric that was not observed. Errors were generally smaller for WAZ than for HAZ. In (the more difficult) Test 1, the median absolute errors of the main model were 0.17-0.21 and for mean HA and WA, 3-6 percentage points for prevalences  $< -2$  and 1-4 percentage points for prevalences  $< -3$  (Webtable 3). In Test 2, which had a mix of missingness patterns, the median absolute errors of the main model were 0.10-0.14 and for mean HA and WA, 2-4 percentage points for prevalences  $< -2$  and 1-2 percentage points for prevalences  $< -3$  (Webtable 3). These figures are very similar to the median difference between two national surveys in the same country-year; they are smaller than the median difference between two surveys in the same country-year when all national and subnational surveys are considered.

Overall, the 95% uncertainty intervals of our estimates included 92-98% of held-out study HAZ and WAZ means and prevalences in Test 1 and 90-98% in Test 2 (Webtable 4), consistent with the expected 95%.

With few exceptions, our model also had generally good predictive validity by region and year of data, and in relation to countries' data availability. When we excluded all recent (post-2000) data for some countries, the uncertainty intervals of model predictions included 89-100% of the known-but-excluded means and prevalences.

Our estimates were not sensitive to key modelling choices. In particular, the estimates from the alternative models were very similar to those of the main model, with median absolute differences for mean HAZ/WAZ all less than 0.03 and those of prevalences smaller than 0.63 percentage points (Webtable 5). Though the covariates did not materially alter our results, we retained them because they decreased the out-of-sample prediction error for both HAZ and WAZ (Webtable 3). Countries whose estimates were most sensitive to excluding all covariates or to excluding just the income covariate included North Korea and a few countries and territories with no or little data or with very unstable data, e.g. Antigua and Barbuda, Barbados, Saint Lucia, Macau, Taiwan and Yemen. Estimates for all these countries had large uncertainty (Webfigure 5).

## References

1. WHO Multicentre Growth Reference Study Group. *WHO child growth standards: Growth velocity based on weight, length and head circumference: Methods and development*. World Health Organization, Geneva, Switzerland, 2009.
2. PVV Hamill, T.A. Drizd, C.L. Johnson, R.B. Reed, A.F. Roche, and W.M. Moore. Physical growth: national center for health statistics percentiles. *The American Journal of Clinical Nutrition*, 32(3):607, 1979.
3. M.M. Finucane, G.A. Stevens, M.J. Cowan, G. Danaei, J.K. Lin, C.J. Paciorek, G.M. Singh, H.R. Gutierrez, Y. Lu, A.N. Bahalim, et al. National, regional, and global trends in body-mass index since 1980: systematic analysis of health examination surveys and epidemiological studies with 960 country-years and 9· 1 million participants. *The Lancet*, 377(9765):557–567, 2011.
4. G. Danaei, M.M. Finucane, Y. Lu, G.M. Singh, M.J. Cowan, C.J. Paciorek, J.K. Lin, F. Farzadfar, Y.H. Khang, G.A. Stevens, et al. National, regional, and global trends in fasting plasma glucose and diabetes prevalence since 1980: systematic analysis of health examination surveys and epidemiological studies with 370 country-years and 2· 7 million participants. *The Lancet*, 378(9785):31–40, 2011.
5. G. Danaei, M.M. Finucane, J.K. Lin, G.M. Singh, C.J. Paciorek, M.J. Cowan, F. Farzadfar, G.A. Stevens, S.S. Lim, L.M. Riley, et al. National, regional, and global trends in systolic blood pressure since 1980: systematic analysis of health examination surveys and epidemiological studies with 786 country-years and 5· 4 million participants. *The Lancet*, 377(9765):568–577, 2011.
6. F. Farzadfar, M.M. Finucane, G. Danaei, P.M. Pelizzari, M.J. Cowan, C.J. Paciorek, G.M. Singh, J.K. Lin, G.A. Stevens, L.M. Riley, et al. National, regional, and global trends in serum total cholesterol since 1980: systematic analysis of health examination surveys and epidemiological studies with 321 country-years and 3· 0 million participants. *The Lancet*, 377(9765):578–586, 2011.
7. M. De Onis and M. Bloessner. The world health organization global database on child growth and malnutrition: methodology and applications. *International Journal of Epidemiology*, 32(4):518, 2003.
8. H. Yang and M. De Onis. Algorithms for converting estimates of child malnutrition based on the nchs reference into estimates based on the who child growth standards. *BMC pediatrics*, 8(1):19, 2008.
9. M. De Onis, A.W. Onyango, E. Borghi, C. Garza, and H. Yang. Comparison of the world health organization (who) child growth standards and the national center for health statistics/who international growth reference: implications for child health programmes. *Public Health Nutrition*, 9(07):942–947, 2006.
10. A. Rodriguez, D.B. Dunson, and J. Taylor. Bayesian hierarchically weighted finite mixture models for samples of distributions. *Biostatistics*, 10(1):155–171, 2009.
11. A. Gelman and J. Hill. *Data Analysis Using Regression and Multilevel/Hierarchical Models*. Cambridge University Press, Cambridge, UK, 2007.
12. NE Breslow and DG Clayton. Approximate inference in generalized linear mixed models. *Journal of the American Statistical Association*, 88(421):9–25, 1993.
13. H. Rue and L. Held. *Gaussian Markov Random Fields: Theory and Applications*. Chapman & Hall, 2005.

14. A. Gelman. Prior distributions for variance parameters in hierarchical models. *Bayesian Analysis*, 1(3): 515–533, 2006.
15. R Development Core Team. *R: A Language and Environment for Statistical Computing*. R Foundation for Statistical Computing, Vienna, Austria, 2008. URL <http://www.R-project.org>. ISBN 3-900051-07-0.
16. B. Shaby and M.T Wells. Exploring an adaptive metropolis algorithm. *Journal of Statistical Computation and Simulation*, In press.

**Webtable 1. Countries and territories in analysis regions.**

| <b>Region</b>                                  | <b>Countries</b>                                                                                                                                                                                                                                                                                                                                                                                                                                                                                                                                          |
|------------------------------------------------|-----------------------------------------------------------------------------------------------------------------------------------------------------------------------------------------------------------------------------------------------------------------------------------------------------------------------------------------------------------------------------------------------------------------------------------------------------------------------------------------------------------------------------------------------------------|
| East and Southeast Asia                        | Cambodia, China, China (Hong Kong SAR), China (Macao SAR), Democratic People's Republic of Korea, Indonesia, Lao People's Democratic Republic, Malaysia, Maldives, Myanmar, Philippines, Sri Lanka, Taiwan, Thailand, Timor-Leste, Viet Nam                                                                                                                                                                                                                                                                                                               |
| Oceania                                        | Fiji, Kiribati, Marshall Islands, Micronesia (Federated States of), Papua New Guinea, Samoa, Solomon Islands, Tonga, Vanuatu                                                                                                                                                                                                                                                                                                                                                                                                                              |
| South Asia                                     | Afghanistan, Bangladesh, Bhutan, India, Nepal, Pakistan                                                                                                                                                                                                                                                                                                                                                                                                                                                                                                   |
| Central Asia, Middle East, and North Africa    | Algeria, Armenia, Azerbaijan, Bahrain, Egypt, Georgia, Iran (Islamic Republic of), Iraq, Jordan, Kazakhstan, Kuwait, Kyrgyzstan, Lebanon, Libyan Arab Jamahiriya, Mongolia, Morocco, Occupied Palestinian Territory, Oman, Qatar, Saudi Arabia, Syrian Arab Republic, Tajikistan, Tunisia, Turkey, Turkmenistan, United Arab Emirates, Uzbekistan, Yemen                                                                                                                                                                                                  |
| Sub-Saharan Africa                             | Angola, Benin, Botswana, Burkina Faso, Burundi, Cameroon, Cape Verde, Central African Republic, Chad, Comoros, Congo, Côte d'Ivoire, Democratic Republic of the Congo, Djibouti, Equatorial Guinea, Eritrea, Ethiopia, Gabon, Gambia, Ghana, Guinea, Guinea-Bissau, Kenya, Lesotho, Liberia, Madagascar, Malawi, Mali, Mauritania, Mauritius, Mozambique, Namibia, Niger, Nigeria, Rwanda, Senegal, Seychelles, Sierra Leone, Somalia, South Africa, Sudan, Swaziland, São Tomé and Príncipe, Togo, Uganda, United Republic of Tanzania, Zambia, Zimbabwe |
| Andean and Central Latin America and Caribbean | Antigua and Barbuda, Bahamas, Barbados, Belize, Bermuda, Bolivia, Colombia, Costa Rica, Cuba, Dominica, Dominican Republic, Ecuador, El Salvador, Grenada, Guatemala, Guyana, Haiti, Honduras, Jamaica, Mexico, Nicaragua, Panama, Peru, Puerto Rico, Saint Lucia, Saint Vincent and the Grenadines, Suriname, Trinidad and Tobago, Venezuela (Bolivarian Republic of)                                                                                                                                                                                    |
| Southern and Tropical Latin America            | Argentina, Brazil, Chile, Paraguay, Uruguay                                                                                                                                                                                                                                                                                                                                                                                                                                                                                                               |

Note: The names of the following countries differ between the Appendix and main paper, respectively: China (Hong Kong SAR) vs. China (Hong Kong), China (Macao SAR) vs. China (Macao); Democratic People's Republic of Korea vs. North Korea, Lao People's Democratic Republic vs. Laos, Iran (Islamic Republic of) vs. Iran, Libyan Arab Jamahiriya vs. Libya, Micronesia (Federated States of) vs. Micronesia, Myanmar vs. Burma, Syrian Arab Republic vs. Syria, United Republic of Tanzania vs. Tanzania, Venezuela (Bolivarian Republic of) vs. Venezuela, and Viet Nam vs. Vietnam.

**Webtable 2. Characteristics of data sources.**

| Country     | Year | Age range | Administrative level | Sample size | Indicators    | Notes* | Survey (when individual level data available) or source (when summary statistics available)                                                                                                                                                                                                                            |
|-------------|------|-----------|----------------------|-------------|---------------|--------|------------------------------------------------------------------------------------------------------------------------------------------------------------------------------------------------------------------------------------------------------------------------------------------------------------------------|
| Afghanistan | 1995 | 0-59.99   | Regional             | 1674        | HAZ, WAZ, WHZ | 3,5    | Kakar F and Kakar SR. Indicators of child morbidity and mortality in three Afghan provinces. The Research and Advisory Council of Afghanistan and UNICEF Afghanistan Program Office. Kabul, Afghanistan, 1996.                                                                                                         |
| Afghanistan | 1997 | 6-59.99   | National             | 4846        | HAZ, WAZ, WHZ | 3,5    | Afghanistan 1997 multiple indicator baseline (MICS). Report to UNICEF. Acapulco: Centro de Investigacion de Enfermedades Tropicales (CIET), 1998 (and additional analysis).                                                                                                                                            |
| Afghanistan | 1999 | 6-59.99   | First admin level    | 913         | WHZ           | 3,5    | Mohibullah Wahdati. Nutritional survey. Surrounding of Mehterlam (Laghman Province). Comprehensive Care for Malnourished Afghan Children. Peshawar, Pakistan, 1999.                                                                                                                                                    |
| Afghanistan | 2000 | 6-59.99   | First admin level    | 5499        | HAZ, WAZ, WHZ | 3,5    | Lukmanji Z and Hamidzai A. Nutrition survey of children under five years: Province of Badakshan, Afghanistan, January 2000. FOCUS Humanitarian Assistance Europe Foundation and Department of Health, Province of Badakshan, Afghanistan. FOCUS Europa Foundation, May 2000.                                           |
| Afghanistan | 2002 | 0-59.99   | First admin level    | 676         | HAZ, WAZ, WHZ | 3,5    | Tohill UR. GOAL Samangan Province, nutrition survey, May - June 2002. GOAL report No. 2. GOAL Afghanistan, 2002.                                                                                                                                                                                                       |
| Afghanistan | 2002 | 0-59.99   | First admin level    | 545         | HAZ, WAZ, WHZ | 3,5    | Woodruff BA, Reynolds M, Tchibindat F, Ahimana C. Nutrition and health survey, Badghis Province, Afghanistan, February - March 2002. UNICEF and U.S. Centers for Disease Control and Prevention (CDC), 2002.                                                                                                           |
| Afghanistan | 2002 | 0-59.99   | First admin level    | 717         | HAZ, WAZ, WHZ | 3,5    | Tohill UR. GOAL Jawzjan Province, nutrition survey, April 2002. GOAL report No. 1. GOAL Afghanistan, 2002.                                                                                                                                                                                                             |
| Afghanistan | 2004 | 6-59.99   | National             | 946         | HAZ, WAZ, WHZ | 2      | Ministry of Public Health (Afghanistan), UNICEF, CDC, National Institute for Research on Food and Nutrition (Italy), Tufts University. Summary report of the national nutrition survey, 2004. Kabul, Islamic Republic of Afghanistan: Ministry of Public Health and UNICEF, 2005 (and additional analysis).            |
| Algeria     | 1992 | 0-59.99   | National             | 4207        | HAZ, WAZ, WHZ | 1      | PAPCHILD Algeria                                                                                                                                                                                                                                                                                                       |
| Algeria     | 1995 | 0-59.99   | National             | 3825        | HAZ, WAZ, WHZ | 2      | Ministère de la Santé et de la Population. Enquête nationale sur les objectifs de la mi-décennie, "MDG Algérie", 1995. Alger, Algérie, 1996 (and additional analysis).                                                                                                                                                 |
| Algeria     | 2000 | 0-59.99   | National             | 4176        | HAZ, WAZ, WHZ | 2      | Ministère de la Santé et de la Population. Enquête nationale sur les objectifs de la fin décennie santé mère et enfant EDG Algérie 2000 (MICS). Institut National de Santé Publique. République Algérienne Démocratique et Populaire, 2001 (and additional analysis).                                                  |
| Algeria     | 2002 | 0-59.99   | National             | 4419        | HAZ, WAZ, WHZ | 2      | Ministère de la Santé, de la Population et de la Réforme Hospitalière et l'Office National des Statistiques. Enquête Algérienne sur la santé de la famille-2002: Rapport principal. Alger, Algérie: Agence Nationale de la Documentation en Santé, 2004 (and additional analysis).                                     |
| Algeria     | 2005 | 0-59.99   | National             | 13975       | HAZ, WAZ, WHZ | 2      | Ministère de la Santé de la Population et de la Réforme Hospitalière, Office National des Statistiques. Suivi de la situation des enfant et des femmes. Enquête nationale à indicateurs multiples: Rapport principal. MICS3. République Algérienne Démocratique et Populaire, Décembre 2008 (and additional analysis). |
| Angola      | 1996 | 6-59.99   | National             | 3015        | HAZ, WAZ, WHZ | 2      | Inquerito de indicadores multiplas (MICS) 1996. Instituto Nacional de Estatistica - Gabinete de Monitorizacao das Condições de Vida da População. Luanda, Angola, 1999 (and additional analysis).                                                                                                                      |
| Angola      | 2001 | 0-59.99   | National             | 5106        | HAZ, WAZ, WHZ | 1      | MICS                                                                                                                                                                                                                                                                                                                   |



| Country    | Year      | Age range | Administrative level | Sample size | Indicators    | Notes* | Survey (when individual level data available) or source (when summary statistics available)                                                                                                                                                                                                                                                                                     |
|------------|-----------|-----------|----------------------|-------------|---------------|--------|---------------------------------------------------------------------------------------------------------------------------------------------------------------------------------------------------------------------------------------------------------------------------------------------------------------------------------------------------------------------------------|
| Angola     | 2007      | 6-59.99   | National             | 10224       | HAZ, WAZ, WHZ | 3      | Ministerio da Saude. Relatorio do inquerito sobre a nutriçao em Angola 2007. Luanda, Republica de Angola: Ministerio da Saude, Direcçao nacional de Saude Publica, 2008.                                                                                                                                                                                                        |
| Argentina  | 1985-1986 | 9-23.99   | First admin level    | 430         | HAZ, WAZ      | 3,5    | Calvo EB, Islam J, Gnazzo N, Ibanez M, de Martinez CB, de Vacaliuc RS et al. [Encuesta nutricional en ninos de 2 anos de la provincia de Misiones. I. Indicadores antropometricos.] Archivos Argentinos de Pediatria 1987;85:247-269.                                                                                                                                           |
| Argentina  | 1994      | 0-59.99   | National             | 5296        | HAZ, WAZ, WHZ | 3,5    | Lejarraga H, Krupitzky S, Gimenez E, Diament N, Kelmansky A, Tibaldi F, et al. The organisation of a national survey for evaluating child psychomotor development in Argentina. Paediatric and Perinatal Epidemiology 1997;11:359-373 (and additional analysis).                                                                                                                |
| Argentina  | 2004-2005 | 6-59.99   | National             | 44732       | HAZ, WAZ, WHZ | 2      | Durán P, Mangialavori G, Biglieri A, Kogan L, Gilardon EA. Nutrition status in Argentinean children 6 to 72 months old. Results from the National Nutrition and Health Survey (ENNyS). Archivos Argentinos de Pediatria 2009;107:397-404 (and additional analysis).                                                                                                             |
| Armenia    | 1998      | 0-59.99   | National             | 3241        | HAZ, WAZ, WHZ | 2      | The health and nutritional status of children and women in Armenia. National Institute of Nutrition - Italy, 1998 (and additional analysis).                                                                                                                                                                                                                                    |
| Armenia    | 2000      | 0-59.99   | National             | 1508        | HAZ, WAZ, WHZ | 1      | DHS                                                                                                                                                                                                                                                                                                                                                                             |
| Armenia    | 2005      | 0-59.99   | National             | 1231        | HAZ, WAZ, WHZ | 1      | DHS                                                                                                                                                                                                                                                                                                                                                                             |
| Armenia    | 2010      | 0-59.99   | National             | 1333        | HAZ, WAZ, WHZ | 2      | National Statistical Service, Ministry of Health, Measure DHS. Armenia Demographic and Health Survey 2010: Preliminary report. Yerevan, Armenia and Calverton, Maryland, USA: National Statistical Service, Ministry of Health, ICF Macro, 2011.                                                                                                                                |
| Azerbaijan | 1996      | 6-59.99   | National             | 500         | HAZ, WAZ, WHZ | 3,5    | Branca F, Burkholder B, Hamel M, Parvanta I, Robertson A. Health and nutrition survey of internally displaced and resident population of Azerbaijan - April 1996. Baku, Azerbaijan, 1996 (and additional analysis).                                                                                                                                                             |
| Azerbaijan | 2000      | 0-59.99   | National             | 1716        | HAZ, WAZ, WHZ | 1      | MICS                                                                                                                                                                                                                                                                                                                                                                            |
| Azerbaijan | 2001      | 3-59.99   | National             | 2426        | HAZ, WAZ, WHZ | 3,5    | Adventist Development and Relief Agency, Azerbaijan Ministry of Health, State Committee of Statistics, Mercy Corps [Baku, Azerbaijan], DRH/CDC, USAID, UNFPA, UNHCR. Reproductive health survey Azerbaijan, 2001: Final report. Serbanescu F, Morris L, Rahimova S, Stupp P, eds. Atlanta, GA: US Department of Health and Human Services, CDC, 2003 (and additional analysis). |
| Azerbaijan | 2006      | 0-59.99   | National             | 1925        | HAZ, WAZ, WHZ | 1      | DHS                                                                                                                                                                                                                                                                                                                                                                             |
| Bahrain    | 1989      | 0-59.99   | National             | 2033        | HAZ, WAZ, WHZ | 3,5    | Ministry of Health. Bahrain child health survey 1989. Manama, Bahrain, 1992.                                                                                                                                                                                                                                                                                                    |
| Bahrain    | 1995      | 0-59.99   | National             | 673         | HAZ, WAZ, WHZ | 3,5    | Naseeb T and Farid SM. Bahrain family health survey 1995: principal report. Manama, Bahrain: Ministry of Health, 2000.                                                                                                                                                                                                                                                          |
| Bangladesh | 1985-1986 | 6-59.99   | National             | 2675        | HAZ, WAZ, WHZ | 3,5    | Government of the Peoples's Republic of Bangladesh. Report of the child nutrition status module, Bangladesh household expenditure survey 1985-86. Bangladesh bureau of statistics. Dhaka, Bangladesh, 1987 (and additional analysis).                                                                                                                                           |
| Bangladesh | 1989-1990 | 6-59.99   | National             | 1914        | HAZ, WAZ, WHZ | 3,5    | Government of the People's Republic of Bangladesh. Report of the child nutrition status survey 1989-90. Bangladesh bureau of statistics. Dhaka, Bangladesh, 1991 (and additional analysis).                                                                                                                                                                                     |
| Bangladesh | 1991      | 6-59.99   | Regional             | 32493       | HAZ, WAZ, WHZ | 2      | Helen Keller International (HKI) Bangladesh. Nutritional Surveillance Project 1991: data on rural national (using the WHO Child Growth Standards). Unpublished estimates. Dhaka, Bangladesh: HKI and Institute of Public Health Nutrition, 2008.                                                                                                                                |

| Country    | Year      | Age range | Administrative level | Sample size | Indicators    | Notes* | Survey (when individual level data available) or source (when summary statistics available)                                                                                                                                                      |
|------------|-----------|-----------|----------------------|-------------|---------------|--------|--------------------------------------------------------------------------------------------------------------------------------------------------------------------------------------------------------------------------------------------------|
| Bangladesh | 1992      | 6-59.99   | Regional             | 36997       | HAZ, WAZ, WHZ | 2      | Helen Keller International (HKI) Bangladesh. Nutritional Surveillance Project 1992: data on rural national (using the WHO Child Growth Standards). Unpublished estimates. Dhaka, Bangladesh: HKI and Institute of Public Health Nutrition, 2008. |
| Bangladesh | 1993      | 6-59.99   | Regional             | 42826       | HAZ, WAZ, WHZ | 2      | Helen Keller International (HKI) Bangladesh. Nutritional Surveillance Project 1993: data on rural national (using the WHO Child Growth Standards). Unpublished estimates. Dhaka, Bangladesh: HKI and Institute of Public Health Nutrition, 2008. |
| Bangladesh | 1994      | 6-59.99   | Regional             | 63753       | HAZ, WAZ, WHZ | 2      | Helen Keller International (HKI) Bangladesh. Nutritional Surveillance Project 1994: data on rural national (using the WHO Child Growth Standards). Unpublished estimates. Dhaka, Bangladesh: HKI and Institute of Public Health Nutrition, 2008. |
| Bangladesh | 1995      | 6-59.99   | Regional             | 87051       | HAZ, WAZ, WHZ | 2      | Helen Keller International (HKI) Bangladesh. Nutritional Surveillance Project 1995: data on rural national (using the WHO Child Growth Standards). Unpublished estimates. Dhaka, Bangladesh: HKI and Institute of Public Health Nutrition, 2008. |
| Bangladesh | 1996      | 6-59.99   | Regional             | 81067       | HAZ, WAZ, WHZ | 2      | Helen Keller International (HKI) Bangladesh. Nutritional Surveillance Project 1996: data on rural national (using the WHO Child Growth Standards). Unpublished estimates. Dhaka, Bangladesh: HKI and Institute of Public Health Nutrition, 2008. |
| Bangladesh | 1996-1997 | 0-59.99   | National             | 4672        | HAZ, WAZ, WHZ | 1      | DHS                                                                                                                                                                                                                                              |
| Bangladesh | 1999-2000 | 0-59.99   | National             | 5302        | HAZ, WAZ, WHZ | 1      | DHS                                                                                                                                                                                                                                              |
| Bangladesh | 2004      | 0-59.99   | National             | 5895        | HAZ, WAZ, WHZ | 1      | DHS                                                                                                                                                                                                                                              |
| Bangladesh | 2007      | 0-59.99   | National             | 5263        | HAZ, WAZ, WHZ | 1      | DHS                                                                                                                                                                                                                                              |
| Belize     | 1992      | 0-59.99   | National             | 8516        | WAZ           | 3,5    | Ministry of Health. Assessment of the food, nutrition and health situation of Belize. INCAP Publication DC1/002. Kingston: Institute of Nutrition of Central America and Panama, 1992 (and additional analysis).                                 |
| Belize     | 2006      | 0-59.99   | National             | 686         | HAZ, WAZ, WHZ | 1      | MICS                                                                                                                                                                                                                                             |
| Benin      | 1996      | 0-35.99   | National             | 2521        | HAZ, WAZ, WHZ | 1      | DHS                                                                                                                                                                                                                                              |
| Benin      | 2001      | 0-59.99   | National             | 4374        | HAZ, WAZ, WHZ | 1      | DHS                                                                                                                                                                                                                                              |
| Benin      | 2006      | 0-59.99   | National             | 12149       | HAZ, WAZ, WHZ | 1      | DHS                                                                                                                                                                                                                                              |
| Bhutan     | 1999      | 6-59.99   | National             | 2996        | HAZ, WAZ, WHZ | 2      | Ministry of Health and Education. National anthropometric survey of under five children in Bhutan. Division of Health Services. Thimpu, Bhutan, 1999 (and additional analysis).                                                                  |
| Bhutan     | 2008      | 6-59.99   | National             | 2348        | HAZ, WAZ, WHZ | 2      | Ministry of Health, National Statistics Bureau and Centre for Research Initiative. National nutrition, infant & young child feeding survey 2008. Thimphu, Bhutan: Ministry of Health and UNICEF, 2009 (and additional analysis).                 |
| Bhutan     | 2010      | 0-59.99   | National             | 6071        | HAZ, WAZ, WHZ | 2      | National Statistics Bureau (NSB). Bhutan multiple indicator cluster survey (BMIS) 2010. Thimphu, Bhutan: NSB, May 2011.                                                                                                                          |
| Bolivia    | 1989      | 3-35.99   | National             | 2603        | HAZ, WAZ, WHZ | 1      | DHS                                                                                                                                                                                                                                              |
| Bolivia    | 1990      | 0-59.99   | First admin level    | 89490       | WAZ           | 3,5    | Ministerio de Prevision Social y Salud Publica. Santa Cruz: estado nutricional de la poblacion menor de cinco anos. Boletin de Sistema de Vigilancia Epidemiologica Nutricional 1991;5(3):1-3.                                                   |
| Bolivia    | 1993-1994 | 0-35.99   | National             | 2867        | HAZ, WAZ, WHZ | 1      | DHS                                                                                                                                                                                                                                              |
| Bolivia    | 1996      | 0-59.99   | National             | 1302        | HAZ, WAZ, WHZ | 3,5    | Gutierrez Sardan M. Encuesta nacional de multiples indicadores 1996 (MICS). La Paz: Ministerio de Desarrollo Humano, enero 1997 (and additional analysis).                                                                                       |
| Bolivia    | 1998      | 0-59.99   | National             | 6139        | HAZ, WAZ, WHZ | 1      | DHS                                                                                                                                                                                                                                              |
| Bolivia    | 2003-2004 | 0-59.99   | National             | 9091        | HAZ, WAZ, WHZ | 1      | DHS                                                                                                                                                                                                                                              |

| Country      | Year      | Age range | Administrative level | Sample size | Indicators    | Notes* | Survey (when individual level data available) or source (when summary statistics available)                                                                                                                                                                                                                                                                                                  |
|--------------|-----------|-----------|----------------------|-------------|---------------|--------|----------------------------------------------------------------------------------------------------------------------------------------------------------------------------------------------------------------------------------------------------------------------------------------------------------------------------------------------------------------------------------------------|
| Bolivia      | 2008      | 0-59.99   | National             | 7672        | HAZ, WAZ, WHZ | 1      | DHS                                                                                                                                                                                                                                                                                                                                                                                          |
| Botswana     | 1996      | 0-59.99   | National             | NR          | HAZ, WAZ, WHZ | 3,5,7  | The 1996 Botswana family health survey III. Gaborone: Central Statistics Office, 1999 (and additional analysis).                                                                                                                                                                                                                                                                             |
| Botswana     | 2000      | 0-59.99   | National             | 2880        | HAZ, WAZ, WHZ | 2      | Charumbira Multiple indicator survey (MIS) 2000. Full report. Gaborone, Botswana, 2001 (and additional analysis).                                                                                                                                                                                                                                                                            |
| Botswana     | 2007-2008 | 0-59.99   | National             | 2622        | HAZ, WAZ, WHZ | 2      | 2007 Botswana family health survey IV report. Gaborone, Botswana: CSO, 2009 (and additional analysis by UNICEF).                                                                                                                                                                                                                                                                             |
| Brazil       | 1986      | 0-59.99   | National             | 1167        | HAZ, WAZ, WHZ | 1      | DHS                                                                                                                                                                                                                                                                                                                                                                                          |
| Brazil       | 1987      | 0-35.99   | First admin level    | 4349        | HAZ, WAZ, WHZ | 2,5    | Saude e nutricao das criancas nordestinas; pesquisas estaduais 1987-92. UNICEF/Universidade Federal de Pelotas. Brasilia: UNICEF, 1995.                                                                                                                                                                                                                                                      |
| Brazil       | 1989      | 0-59.99   | First admin level    | 1093        | HAZ, WAZ, WHZ | 2,5    | Saude e nutricao das criancas nordestinas; pesquisas estaduais 1987-92. UNICEF/Universidade Federal de Pelotas. Brasilia: UNICEF, 1995.                                                                                                                                                                                                                                                      |
| Brazil       | 1989      | 0-59.99   | National             | 7487        | HAZ, WAZ, WHZ | 1      | PNSN 1989                                                                                                                                                                                                                                                                                                                                                                                    |
| Brazil       | 1989      | 0-59.99   | First admin level    | 1038        | HAZ, WAZ, WHZ | 2,5    | Saude e nutricao das criancas nordestinas; pesquisas estaduais 1987-92. UNICEF/Universidade Federal de Pelotas. Brasilia: UNICEF, 1995.                                                                                                                                                                                                                                                      |
| Brazil       | 1990      | 0-35.99   | First admin level    | 2770        | HAZ, WAZ, WHZ | 2,5    | Saude e nutricao das criancas nordestinas; pesquisas estaduais 1987-92. UNICEF/Universidade Federal de Pelotas. Brasilia: UNICEF, 1995.                                                                                                                                                                                                                                                      |
| Brazil       | 1991      | 0-59.99   | First admin level    | 1026        | HAZ, WAZ      | 2,5    | Saude e nutricao das criancas nordestinas; pesquisas estaduais 1987-92. UNICEF/Universidade Federal de Pelotas. Brasilia: UNICEF, 1995.                                                                                                                                                                                                                                                      |
| Brazil       | 1991      | 0-59.99   | First admin level    | 1244        | HAZ, WAZ, WHZ | 2,5    | Saude e nutricao das criancas nordestinas; pesquisas estaduais 1987-92. UNICEF/Universidade Federal de Pelotas. Brasilia: UNICEF, 1995.                                                                                                                                                                                                                                                      |
| Brazil       | 1991      | 0-59.99   | First admin level    | 916         | HAZ, WAZ, WHZ | 2,5    | Saude e nutricao das criancas nordestinas; pesquisas estaduais 1987-92. UNICEF/Universidade Federal de Pelotas. Brasilia: UNICEF, 1995.                                                                                                                                                                                                                                                      |
| Brazil       | 1991      | 0-59.99   | First admin level    | 1262        | HAZ, WAZ, WHZ | 2,5    | Saude e nutricao das criancas nordestinas; pesquisas estaduais 1987-92. UNICEF/Universidade Federal de Pelotas. Brasilia: UNICEF, 1995.                                                                                                                                                                                                                                                      |
| Brazil       | 1996      | 0-59.99   | National             | 4045        | HAZ, WAZ, WHZ | 1      | DHS                                                                                                                                                                                                                                                                                                                                                                                          |
| Brazil       | 2002-2003 | 0-59.99   | National             | 17107       | WAZ           | 2      | Laboratório de Avaliação Nutricional de Populações, Universidade de Sao Paulo (LANPOP-USP). Pesquisa de orçamentos familiares (POF - 2002-03). Rio de Janeiro, Brazil, 2007 ( <a href="http://www.ibge.gov.br/home/estatistica/populacao/condicaoodevida/pof/2003medidas/default.shtm">http://www.ibge.gov.br/home/estatistica/populacao/condicaoodevida/pof/2003medidas/default.shtm</a> ). |
| Brazil       | 2006-2007 | 0-59.99   | National             | 4415        | HAZ, WAZ, WHZ | 2      | Centro Brasileiro de Análise e Planejamento [CEBRAP]. Pesquisa nacional de demografia e saúde da criança e da mulher - PNDS 2006. Relatório da pesquisa. Sao Paulo: CEBRAP, 2008 ( <a href="http://bvsmis.saude.gov.br/bvs/pnds/index.php">http://bvsmis.saude.gov.br/bvs/pnds/index.php</a> and additional analysis).                                                                       |
| Burkina Faso | 1987      | 12-47.99  | Regional             | 606         | WAZ           | 3,5    | Ouedraogo NA. Analyse de la situation nutritionnelle des populations du Burkina Faso. Conference Internationale sur la Nutrition. Rome: FAO/WHO, 1992.                                                                                                                                                                                                                                       |
| Burkina Faso | 1992-1993 | 0-59.99   | National             | 4358        | HAZ, WAZ, WHZ | 1      | DHS                                                                                                                                                                                                                                                                                                                                                                                          |
| Burkina Faso | 1998-1999 | 0-59.99   | National             | 4515        | HAZ, WAZ, WHZ | 1      | DHS                                                                                                                                                                                                                                                                                                                                                                                          |
| Burkina Faso | 2003      | 0-59.99   | National             | 8007        | HAZ, WAZ, WHZ | 1      | DHS                                                                                                                                                                                                                                                                                                                                                                                          |

| Country                  | Year      | Age range | Administrative level | Sample size | Indicators    | Notes* | Survey (when individual level data available) or source (when summary statistics available)                                                                                                                                                                                                                                                                                        |
|--------------------------|-----------|-----------|----------------------|-------------|---------------|--------|------------------------------------------------------------------------------------------------------------------------------------------------------------------------------------------------------------------------------------------------------------------------------------------------------------------------------------------------------------------------------------|
| Burkina Faso             | 2006      | 0-59.99   | National             | 4680        | HAZ, WAZ, WHZ | 1      | MICS                                                                                                                                                                                                                                                                                                                                                                               |
| Burkina Faso             | 2009      | 0-59.99   | National             | 15318       | HAZ, WAZ, WHZ | 3      | Ministry of Health. Enquête nutritionnelle nationale 2009. Ouagadougou, Burkina Faso: Direction de la Nutrition, 2009 (and additional analysis).                                                                                                                                                                                                                                   |
| Burkina Faso             | 2011      | 0-59.99   | National             | 6994        | HAZ, WAZ, WHZ | 2      | Institut National de la Statistique et de la Demographie, Measure DHS. Burkina Faso Enquete Demographique et de la Sante et a Indicateurs Multiples 2010: Rapport preliminaire. Ouagadougou, Burkina Faso and Calverton, Maryland, USA: Institut National de la Statistique et de la Demographie, and ICF Macro, 2011.                                                             |
| Burundi                  | 1987      | 3-35.99   | National             | 1896        | HAZ, WAZ, WHZ | 1      | DHS                                                                                                                                                                                                                                                                                                                                                                                |
| Burundi                  | 2000      | 6-59.99   | National             | 2586        | HAZ, WAZ, WHZ | 1      | MICS                                                                                                                                                                                                                                                                                                                                                                               |
| Burundi                  | 2005      | 0-59.99   | National             | 7065        | HAZ, WAZ, WHZ | 3,5    | Rapport de l'enquête nationale de nutrition de la population, 2005. Bujumbura, Burundi, October 2006 (and additional analysis).                                                                                                                                                                                                                                                    |
| Burundi                  | 2010      | 0-59.99   | National             | 3590        | HAZ, WAZ, WHZ | 3      | Institut de Statistiques et d'Etudes Economiques du Burundi, Institut National de Sante Publique, Measure DHS. Burundi Enquete Demographique et de la Sante 2010: Rapport preliminaire. Calverton, Maryland, USA: Institut de Statistiques et d'Etudes Economiques du Burundi, Institut National de Sante Publique, and ICF Macro, 2011.                                           |
| Cambodia                 | 1996      | 0-59.99   | National             | 5773        | HAZ, WAZ, WHZ | 2      | Ministry of Planning. Socio economic survey of Cambodia 1996: Volume 1, summary results. National Institute of Statistics. Phnom Penh, Cambodia, 1997 (and additional analysis).                                                                                                                                                                                                   |
| Cambodia                 | 2000      | 0-59.99   | National             | 3467        | HAZ, WAZ, WHZ | 1      | DHS                                                                                                                                                                                                                                                                                                                                                                                |
| Cambodia                 | 2005-2006 | 0-59.99   | National             | 3566        | HAZ, WAZ, WHZ | 1      | DHS                                                                                                                                                                                                                                                                                                                                                                                |
| Cambodia                 | 2008      | 0-59.99   | National             | 7019        | HAZ, WAZ, WHZ | 2      | National Institute of Statistics, Ministry of Planning and UNICEF Cambodia. Cambodia anthropometrics survey 2008. Phnom Penh, Cambodia: National Institute of Statistics, Ministry of Planning and UNICEF Cambodia, 2009 (and additional analysis).                                                                                                                                |
| Cambodia                 | 2010      | 0-59.99   | National             | 3675        | HAZ, WAZ, WHZ | 1      | DHS                                                                                                                                                                                                                                                                                                                                                                                |
| Cameroon                 | 1990      | 0-59.99   | First admin level    | 2010        | HAZ, WAZ, WHZ | 2      | Mendoza Aldana J, Piechulek H. Situation nutritionnelle des enfants de 0 à 59 mois en zone urbaine et rurale du Cameroun. Bulletin of the World Health Organization 1992;70:725-732.                                                                                                                                                                                               |
| Cameroon                 | 1991      | 0-59.99   | National             | 2615        | HAZ, WAZ, WHZ | 1      | DHS                                                                                                                                                                                                                                                                                                                                                                                |
| Cameroon                 | 1998      | 0-35.99   | National             | 1789        | HAZ, WAZ, WHZ | 1      | DHS                                                                                                                                                                                                                                                                                                                                                                                |
| Cameroon                 | 2004      | 0-59.99   | National             | 3189        | HAZ, WAZ, WHZ | 1      | DHS                                                                                                                                                                                                                                                                                                                                                                                |
| Cameroon                 | 2006      | 0-59.99   | National             | 6117        | HAZ, WAZ, WHZ | 2      | Institut National de la Statistique et UNICEF. Cameroun: Suivi de la situation des enfants et des femmes. Enquête par grappe à indicateurs multiples 2006. Rapport principal. Yaoundé, Cameroun: Institut National de la Statistique et UNICEF, 2008 (and additional analysis).                                                                                                    |
| Cameroon                 | 2011      | 0-59.99   | National             | 5860        | HAZ, WAZ, WHZ | 3      | Institut National de la Statistique, Ministère de l'Economie, Ministère de la Sante Publique, Measure DHS. Cameroun Enquete Demographique et de la Sante et a Indicateurs Multiples 2011: Rapport preliminaire. Yaounde, Cameroun and Calverton, Maryland, USA: Institut National de la Statistique, Ministère de l'Economie, Ministère de la Sante Publique, and ICF Macro, 2011. |
| Cape Verde               | 1994      | 0-59.99   | National             | 1610        | HAZ, WAZ, WHZ | 3,5    | Ferreira Medina JB, Skard T, Sobhy S, America Ungaretti M. A saude das crianças menores de cinco anos em Cabo Verde. Ministério de Saude e Promoção Social e UNICEF. Cabo Verde, 1996 (and additional analysis).                                                                                                                                                                   |
| Central African Republic | 1994-1995 | 0-35.99   | National             | 2327        | HAZ, WAZ, WHZ | 1      | DHS                                                                                                                                                                                                                                                                                                                                                                                |

| Country                  | Year      | Age range | Administrative level | Sample size | Indicators    | Notes* | Survey (when individual level data available) or source (when summary statistics available)                                                                                                                                                   |
|--------------------------|-----------|-----------|----------------------|-------------|---------------|--------|-----------------------------------------------------------------------------------------------------------------------------------------------------------------------------------------------------------------------------------------------|
| Central African Republic | 1995      | 0-59.99   | National             | 2225        | HAZ, WAZ, WHZ | 3,5    | Ministère de la Santé Publique et de la Population. Etat nutritionnel de la population. Rapport préliminaire de l'enquête de nutrition mai-juillet 1995. Bangui, République Centrafricaine, 1995 (and additional analysis).                   |
| Central African Republic | 2000      | 0-59.99   | National             | 12683       | HAZ, WAZ, WHZ | 1      | MICS                                                                                                                                                                                                                                          |
| Central African Republic | 2006      | 0-59.99   | National             | 8562        | HAZ, WAZ, WHZ | 1      | MICS                                                                                                                                                                                                                                          |
| Chad                     | 1996-1997 | 0-59.99   | National             | 5607        | HAZ, WAZ, WHZ | 1      | DHS                                                                                                                                                                                                                                           |
| Chad                     | 2000      | 0-59.99   | National             | 5184        | HAZ, WAZ, WHZ | 1      | MICS                                                                                                                                                                                                                                          |
| Chad                     | 2004      | 0-59.99   | National             | 4329        | HAZ, WAZ, WHZ | 1      | DHS                                                                                                                                                                                                                                           |
| Chile                    | 2001      | 0-59.99   | National             | 1002454     | HAZ, WAZ, WHZ | 3,4,5  | Ministerio de Salud, Departamento de Estadísticas e Informacion. National health service system. Santiago, Chile, 2002 (and additional analysis).                                                                                             |
| Chile                    | 2002      | 0-59.99   | National             | 1022552     | HAZ, WAZ, WHZ | 3,4,5  | Ministerio de Salud, Departamento de Estadísticas e Informacion. National health service system. Santiago, Chile, 2003 (and additional analysis).                                                                                             |
| Chile                    | 2007      | 0-47.99   | National             | 604485      | HAZ, WAZ, WHZ | 3,4    | Atalah E. Ministerio de Salud. National Health Service System. Santiago, Chile, December 2007 (www.minsal.cl).                                                                                                                                |
| Chile                    | 2008      | 0-47.99   | National             | 665633      | HAZ, WAZ, WHZ | 3,4    | Atalah E. Ministerio de Salud. National Health Service System. Santiago, Chile, December 2008 (www.minsal.cl).                                                                                                                                |
| China                    | 1987      | 0-59.99   | Regional             | 76130       | HAZ, WAZ, WHZ | 3,5    | Institute of Nutrition and Food Hygiene. The third national growth and development survey of children in China, 1987 (and additional analysis).                                                                                               |
| China                    | 1989      | 0-59.99   | Regional             | 5744        | HAZ, WAZ, WHZ | 1      | CHNS 1989                                                                                                                                                                                                                                     |
| China                    | 1990      | 0-59.99   | Regional             | 4332        | HAZ, WAZ, WHZ | 2      | Chen Chunming, He Wu, Wang Yuying. Nutritional status of children aged 0-5 years old in China (1990) - National surveillance system in 7 provinces. Beijing, China: Chinese Center for Disease Control and Prevention, 2010.                  |
| China                    | 1991      | 2-59.99   | Regional             | 964         | HAZ, WAZ, WHZ | 1      | CHNS 1991                                                                                                                                                                                                                                     |
| China                    | 1992      | 0-59.99   | National             | 5535        | HAZ, WAZ, WHZ | 2      | Ge Keyou. The dietary and nutritional status of Chinese population (1992 national nutrition survey). Beijing: Institute of Nutrition and Food Hygiene, 1995 (and additional analysis).                                                        |
| China                    | 1993      | 1-59.99   | Regional             | 611         | HAZ, WAZ, WHZ | 1      | CHNS 1993                                                                                                                                                                                                                                     |
| China                    | 1995      | 0-59.99   | Regional             | 2832        | HAZ, WAZ, WHZ | 2      | Chen Chunming, He Wu, Wang Yuying. Nutritional status of children aged 0-5 years old in China (1995) - National surveillance system in 7 provinces. Beijing, China: Chinese Center for Disease Control and Prevention, 2010.                  |
| China                    | 1997      | 0-59.99   | Regional             | 409         | HAZ, WAZ, WHZ | 1      | CHNS 1997                                                                                                                                                                                                                                     |
| China                    | 1998      | 0-59.99   | National             | 13838       | HAZ, WAZ, WHZ | 2      | Chen Chunming, He Wu, Wang Yuying. Nutritional status of children aged 0-5 years old in China (1998) - National (40 nutrition surveillance sites from 26 provinces). Beijing, China: Chinese Center for Disease Control and Prevention, 2010. |
| China                    | 1999      | 0-35.99   | First admin level    | 1497        | WAZ           | 3,5    | Dang S, Yan H, Yamamoto S, Wang X, Zeng L. Poor nutritional status of younger Tibetan children living at high altitudes. European Journal of Clinical Nutrition 2004;58:938-46.                                                               |
| China                    | 2000      | 2-59.99   | Regional             | 373         | HAZ, WAZ, WHZ | 1      | CHNS 2000                                                                                                                                                                                                                                     |
| China                    | 2000      | 0-59.99   | National             | 16460       | HAZ, WAZ, WHZ | 2      | Chen Chunming, He Wu, Wang Yuying. Nutritional status of children aged 0-5 years old in China (2000) - National (40 nutrition surveillance sites from 26 provinces). Beijing, China: Chinese Center for Disease Control and Prevention, 2010. |

| Country                         | Year      | Age range | Administrative level | Sample size | Indicators    | Notes* | Survey (when individual level data available) or source (when summary statistics available)                                                                                                                                                                                      |
|---------------------------------|-----------|-----------|----------------------|-------------|---------------|--------|----------------------------------------------------------------------------------------------------------------------------------------------------------------------------------------------------------------------------------------------------------------------------------|
| China                           | 2002      | 0-59.99   | National             | 16557       | HAZ, WAZ, WHZ | 2      | Yang X, Wang Z, He Y, Yu W, Hu Y, Zhai F. [Trends and prevalence of malnutrition among Chinese children under five years old.] Acta Nutrimenta Sinica 2005;25:185-88 (and additional analysis).                                                                                  |
| China                           | 2004      | 1-59.99   | Regional             | 345         | HAZ, WAZ, WHZ | 1      | CHNS 2004                                                                                                                                                                                                                                                                        |
| China                           | 2005      | 0-59.99   | National             | 15987       | HAZ, WAZ, WHZ | 2      | Chen Chunming, He Wu, Wang Yuying. Nutritional status of children aged 0-5 years old in China (2005) - National (40 nutrition surveillance sites from 26 provinces). Beijing, China: Chinese Center for Disease Control and Prevention, 2010.                                    |
| China                           | 2006      | 0-59.99   | Regional             | 336         | HAZ, WAZ, WHZ | 1      | CHNS 2006                                                                                                                                                                                                                                                                        |
| China                           | 2010      | 0-59.99   | National             | 15399       | HAZ, WAZ, WHZ | 2      | Nutritional status of children aged 0-5 years old in China (2010) - National (38 nutrition surveillance sites from 25 provinces). Beijing, China: Chinese Center for Disease Control and Prevention, 2012 (and additional analysis).                                             |
| China, Hong Kong SAR            | 1993      | 0-59.99   | National             | 9654        | HAZ, WAZ, WHZ | 2,5    | Leung SSF. Growth standards for Hong Kong: a territory wide survey in 1993. Hong Kong: The Chinese University of Hong Kong, 1995.                                                                                                                                                |
| Colombia                        | 1986      | 3-35.99   | National             | 1321        | HAZ, WAZ, WHZ | 1      | DHS                                                                                                                                                                                                                                                                              |
| Colombia                        | 1989      | 0-59.99   | National             | 1973        | HAZ, WAZ, WHZ | 3,5    | Mora JO, de Paredes B, de Navarro L, Rodriguez E. Consistent improvement in the nutritional status of Colombian children between 1965 and 1989. Bulletin of PAHO 1992;26:1-13 (and additional analysis).                                                                         |
| Colombia                        | 1995      | 0-59.99   | National             | 4495        | HAZ, WAZ, WHZ | 1      | DHS                                                                                                                                                                                                                                                                              |
| Colombia                        | 2000      | 0-59.99   | National             | 4170        | HAZ, WAZ, WHZ | 1      | DHS                                                                                                                                                                                                                                                                              |
| Colombia                        | 2004-2005 | 0-59.99   | National             | 12370       | HAZ, WAZ, WHZ | 1      | DHS                                                                                                                                                                                                                                                                              |
| Colombia                        | 2009-2010 | 0-59.99   | National             | 15907       | HAZ, WAZ, WHZ | 1      | DHS                                                                                                                                                                                                                                                                              |
| Comoros                         | 1991-1992 | 0-23.99   | National             | 1954        | HAZ, WAZ, WHZ | 3,5    | Ministère de la Santé Publique et de la Population. Rapport sur l'état nutritionnel et les facteurs impliqués chez les enfants de moins de deux ans en République Fédérale Islamique des Comores 1991. Direction de la Santé Familiale. Comores, 1995 (and additional analysis). |
| Comoros                         | 1996      | 0-35.99   | National             | 949         | HAZ, WAZ, WHZ | 1      | DHS                                                                                                                                                                                                                                                                              |
| Comoros                         | 2000      | 0-59.99   | National             | 3233        | HAZ, WAZ, WHZ | 1      | MICS                                                                                                                                                                                                                                                                             |
| Congo                           | 2005      | 0-59.99   | National             | 3844        | HAZ, WAZ, WHZ | 1      | DHS                                                                                                                                                                                                                                                                              |
| Costa Rica                      | 2008-2009 | 0-59.99   | National             | 351         | HAZ, WAZ, WHZ | 3,8    | Ministerio de Salud. Encuesta nacional de nutrición 2008-2009. San Jose, Costa Rica, 2011.                                                                                                                                                                                       |
| Cuba                            | 2000      | 0-59.99   | National             | 1571        | HAZ, WAZ, WHZ | 3,5    | Encuesta de agrupacion de indicadores multiples: Informe final, diciembre del 2000 (MICS2). La Habana, Cuba, 2000 (and additional analysis).                                                                                                                                     |
| Côte d'Ivoire                   | 1986      | 0-59.99   | National             | 1947        | HAZ, WAZ, WHZ | 3,5    | Sahn DE. Malnutrition in Côte d'Ivoire, prevalence and determinants. Working paper No. 4. Washington D.C.: The World Bank, 1990 (and additional analysis).                                                                                                                       |
| Côte d'Ivoire                   | 1994      | 0-35.99   | National             | 3398        | HAZ, WAZ, WHZ | 1      | DHS                                                                                                                                                                                                                                                                              |
| Côte d'Ivoire                   | 1998-1999 | 0-59.99   | National             | 1529        | HAZ, WAZ, WHZ | 1      | DHS                                                                                                                                                                                                                                                                              |
| Côte d'Ivoire                   | 2006      | 0-59.99   | National             | 8241        | HAZ, WAZ, WHZ | 1      | MICS                                                                                                                                                                                                                                                                             |
| Côte d'Ivoire                   | 2007      | 6-59.99   | National             | 853         | HAZ, WAZ, WHZ | 2      | Tschannen AB, Rohner F, Gohou V, Bosso E, Malan A. Evaluation des carences en vitamine A et fer en Côte d'Ivoire (Rapport final). Ministère de la Santé et de l'Hygiène Publique et Helen Keller Int., Abidjan, Côte d'Ivoire, 2009 (and additional analysis).                   |
| Dem. People's Republic of Korea | 1997      | 0-59.99   | Regional             | 2275        | HAZ, WHZ      | 2,4,5  | Katona Apte J, Mokdad A. Malnutrition of children in the Democratic People's Republic of North Korea. Journal of Nutrition 1998;128:1315-1319.                                                                                                                                   |

| Country                          | Year | Age range | Administrative level | Sample size | Indicators    | Notes* | Survey (when individual level data available) or source (when summary statistics available)                                                                                                                                                                                                                                            |
|----------------------------------|------|-----------|----------------------|-------------|---------------|--------|----------------------------------------------------------------------------------------------------------------------------------------------------------------------------------------------------------------------------------------------------------------------------------------------------------------------------------------|
| Dem. People's Republic of Korea  | 1998 | 6-59.99   | Regional             | 1263        | HAZ, WAZ, WHZ | 3,5    | Nutrition survey of the Democratic People's Republic of Korea. Report by the EU, UNICEF and WFP of a study undertaken in collaboration with the Government to DPRK (Internet, 7 January 1999 at <a href="http://www.wfp.org/OP/Countries/dprk/nutrition_survey.html">http://www.wfp.org/OP/Countries/dprk/nutrition_survey.html</a> ). |
| Dem. People's Republic of Korea  | 2000 | 0-59.99   | National             | 4175        | HAZ, WAZ, WHZ | 3,5    | Central Bureau of Statistics [DPRK]. Report of the second multiple indicator cluster survey 2000, DPRK (MICS). Pyongyang, Democratic People's Republic of Korea, 2000.                                                                                                                                                                 |
| Dem. People's Republic of Korea  | 2002 | 0-59.99   | National             | 5298        | HAZ, WAZ, WHZ | 2      | Central Bureau of Statistics (D.P.R. Korea). Nutrition assessment 2002 D.P.R. Korea. Pyongyang: Government of D.P.R. Korea, United Nations Children's Fund and World Food Programme, 2003 (and additional analysis).                                                                                                                   |
| Dem. People's Republic of Korea  | 2009 | 0-59.99   | National             | 2172        | HAZ, WAZ, WHZ | 2      | Central Bureau of Statistics (CBS), Institute of Children's Nutrition, UNICEF. The Democratic People's Republic of Korea (DPR Korea) multiple indicator cluster survey 2009 (MICS4). Final Report. Pyongyang, DPR Korea: CBS and UNICEF, 2010.                                                                                         |
| Democratic Republic of the Congo | 1995 | 0-59.99   | National             | 4362        | HAZ, WAZ, WHZ | 3,5    | Ministère du Plan et Reconstruction Nationale. Enquête nationale sur la situation des enfants et des femmes au Zaïre en 1995. Kinshasa, Zaïre, 1996 (and additional analysis).                                                                                                                                                         |
| Democratic Republic of the Congo | 2001 | 0-59.99   | National             | 9279        | HAZ, WAZ, WHZ | 1      | MICS                                                                                                                                                                                                                                                                                                                                   |
| Democratic Republic of the Congo | 2007 | 0-59.99   | National             | 3215        | HAZ, WAZ, WHZ | 1      | DHS                                                                                                                                                                                                                                                                                                                                    |
| Democratic Republic of the Congo | 2010 | 0-59.99   | National             | 10568       | HAZ, WAZ, WHZ | 2      | Ministry of Planning National Institute of Statistics in Collaboration with the United Nations Children's Fund Institut National de la Statistique et Fonds des Nations Unies pour l'Enfance, Enquete par Grappes a Indicateurs Multiples en Republique Democratique du Congo (MICS-RDS 2010), Rapport Final, Mai 2011.                |
| Djibouti                         | 1989 | 0-59.99   | National             | 3750        | HAZ, WAZ, WHZ | 3,5    | Ministere de la Sante Publique et des Affaires Sociales. Enquete couverture vaccinale malnutrition. Republique de Djibouti, Djibouti: Ministere de la Sante Publique et des Affaires Sociales, 1990 (and additional analysis).                                                                                                         |
| Djibouti                         | 1996 | 0-59.99   | National             | NR          | HAZ, WAZ, WHZ | 3,5,7  | Enquête djiboutienne auprès des ménages indicateurs sociaux (EDAM-IS 1996). Ministère du Commerce et du Tourisme, Direction Nationale de la Statistique. Djibouti ville, République de Djibouti, 1997 (and additional analysis).                                                                                                       |
| Djibouti                         | 2002 | 0-59.99   | National             | 2289        | HAZ, WAZ, WHZ | 2      | Department of Statistics and Demographic Studies, Ministry of Health and Pan Arab Project for Family Health. Enquête djiboutienne sur la santé de la famille (EDSF/PAPFAM) 2002, PAPFAM Rapport final. Djibouti, 2004 (and additional analysis).                                                                                       |
| Djibouti                         | 2006 | 0-59.99   | National             | 1732        | HAZ, WAZ, WHZ | 1      | MICS                                                                                                                                                                                                                                                                                                                                   |
| Dominican Republic               | 1986 | 6-35.99   | National             | 1926        | HAZ, WAZ, WHZ | 1      | DHS                                                                                                                                                                                                                                                                                                                                    |
| Dominican Republic               | 1991 | 0-59.99   | National             | 3167        | HAZ, WAZ, WHZ | 1      | DHS                                                                                                                                                                                                                                                                                                                                    |
| Dominican Republic               | 1996 | 0-59.99   | National             | 3719        | HAZ, WAZ, WHZ | 1      | DHS                                                                                                                                                                                                                                                                                                                                    |
| Dominican Republic               | 2000 | 0-59.99   | National             | 1862        | HAZ, WAZ, WHZ | 1      | MICS                                                                                                                                                                                                                                                                                                                                   |
| Dominican Republic               | 2002 | 0-59.99   | National             | 9245        | HAZ, WAZ, WHZ | 1      | DHS                                                                                                                                                                                                                                                                                                                                    |
| Dominican Republic               | 2006 | 0-59.99   | National             | 3782        | HAZ, WAZ, WHZ | 3,5    | Oficina Nacional de Estadística (ONE). Encuesta nacional de hogares de propósito múltiples (ENHOGAR 2006): Informe general. Santo Domingo, República Dominicana: ONE, 2008 (and additional analysis).                                                                                                                                  |
| Dominican Republic               | 2007 | 0-59.99   | National             | 9212        | HAZ, WAZ, WHZ | 1      | DHS                                                                                                                                                                                                                                                                                                                                    |

| Country           | Year      | Age range | Administrative level | Sample size | Indicators    | Notes* | Survey (when individual level data available) or source (when summary statistics available)                                                                                                                                                                                                          |
|-------------------|-----------|-----------|----------------------|-------------|---------------|--------|------------------------------------------------------------------------------------------------------------------------------------------------------------------------------------------------------------------------------------------------------------------------------------------------------|
| Ecuador           | 1986      | 0-59.99   | National             | 7798        | HAZ, WAZ, WHZ | 3,5    | Freire W, Dirren H, Mora J, Arenales P, Granda E, Breilh J, et al. [Diagnostico de la situacion alimentaria, nutricional y de salud de la poblacion ecuatoriana menor de cinco años. Quito: Ministerio de Salud Publica y Consejo Nacional de Desarrollo, 1988 (and additional analysis).            |
| Ecuador           | 1998      | 0-59.99   | National             | 2998        | HAZ, WAZ, WHZ | 3,5    | Larrea C, Freire WB, Lutter C. Equidad desde el principio - situacion nutricional de los niños ecuatorianos. Encuesta de condiciones de vida, 1998. Organizacion Panamericana de la Salud y Ministerio de Salud Publica, Ecuador. Washington, D.C.: OPS, 2001 (and additional analysis).             |
| Ecuador           | 2004      | 0-59.99   | National             | 5134        | HAZ, WAZ, WHZ | 2      | Centro de Estudios de Poblacion y Desarrollo Social (CEPAR) et al. Encuesta demografia y de salud materna e infantil, ENDEMAIN 2004: Informe final. Quito, Ecuador: CEPAR, 2005 (and additional analysis).                                                                                           |
| Egypt             | 1988-1989 | 3-35.99   | National             | 2022        | HAZ, WAZ, WHZ | 1      | DHS                                                                                                                                                                                                                                                                                                  |
| Egypt             | 1991      | 0-59.99   | National             | 3446        | HAZ, WAZ, WHZ | 1      | PAPCHILD Egypt                                                                                                                                                                                                                                                                                       |
| Egypt             | 1992-1993 | 0-59.99   | National             | 7174        | HAZ, WAZ, WHZ | 1      | DHS                                                                                                                                                                                                                                                                                                  |
| Egypt             | 1995-1996 | 0-59.99   | National             | 10037       | HAZ, WAZ, WHZ | 1      | DHS                                                                                                                                                                                                                                                                                                  |
| Egypt             | 1996      | 0-59.99   | National             | 1629        | HAZ, WAZ, WHZ | 3,5    | El Tawila S. Child well-being in Egypt: results of Egypt's multiple indicator cluster survey (MICS). Cairo: Social Research Centre, American University, 1997.                                                                                                                                       |
| Egypt             | 1997-1998 | 0-59.99   | National             | 3328        | HAZ, WAZ, WHZ | 3,5    | Egypt demographic and health survey 1997. Demographic and Health Surveys. El-Zanaty and Associates, Cairo, Egypt, 1998 (and additional analysis).                                                                                                                                                    |
| Egypt             | 1998      | 0-59.99   | National             | 3997        | HAZ, WAZ, WHZ | 3,5    | El-Zanaty et al. Egypt demographic and health survey 1998. Demographic and Health Surveys. Cairo, Egypt, 1999 (and additional analysis).                                                                                                                                                             |
| Egypt             | 2000      | 0-59.99   | National             | 10210       | HAZ           | 1      | DHS                                                                                                                                                                                                                                                                                                  |
| Egypt             | 2003      | 0-59.99   | National             | 6019        | HAZ, WAZ, WHZ | 1      | DHS                                                                                                                                                                                                                                                                                                  |
| Egypt             | 2005      | 0-59.99   | National             | 12199       | HAZ, WAZ, WHZ | 1      | DHS                                                                                                                                                                                                                                                                                                  |
| Egypt             | 2008      | 0-59.99   | National             | 9345        | HAZ, WAZ, WHZ | 1      | DHS                                                                                                                                                                                                                                                                                                  |
| El Salvador       | 1988      | 0-59.99   | National             | 2002        | HAZ, WAZ, WHZ | 2      | Evaluacion de la situacion alimentaria nutricional en El Salvador (ESANES-88). Ministerio de Salud Publica y Asistencia Social. San Salvador, El Salvador, 1990 (and additional analysis).                                                                                                           |
| El Salvador       | 1993      | 0-59.99   | National             | 3598        | HAZ, WAZ, WHZ | 2      | Salvadoran Demographic Association. National family health survey 1993 (FESAL-93). San Salvador: Government of El Salvador, 1994 (and additional analysis).                                                                                                                                          |
| El Salvador       | 1994      | 0-59.99   | Regional             | 545         | HAZ, WAZ, WHZ | 3,5    | Ministerio de Salud. Informe final: Linea basal de la evaluacion programa nacional de educacion nutricional. San Salvador, El Salvador, 1995.                                                                                                                                                        |
| El Salvador       | 1998      | 3-59.99   | National             | 6624        | HAZ, WAZ, WHZ | 1      | RHS El Salvador 1998                                                                                                                                                                                                                                                                                 |
| El Salvador       | 2002-2003 | 0-59.99   | National             | 5250        | HAZ, WAZ, WHZ | 1      | RHS El Salvador 2002-2003                                                                                                                                                                                                                                                                            |
| El Salvador       | 2008      | 0-59.99   | National             | 4611        | HAZ, WAZ, WHZ | 1      | RHS El Salvador 2008                                                                                                                                                                                                                                                                                 |
| Equatorial Guinea | 1992      | 0-59.99   | Regional             | 1252        | HAZ, WAZ, WHZ | 3,5    | Ministère de la Santé de Guinée Equatoriale. Evaluation de l'état nutritionnel et de la mortalité infantile dans la région continentale de la Guinée Equatoriale. Document technique No 840/SG/DSP. Yaounde: Organisation de Cooperation pour la lutte contre les Endemes en Afrique Centrale, 1993. |
| Equatorial Guinea | 1997      | 0-59.99   | National             | 412         | HAZ, WAZ, WHZ | 2      | Custodio E, Descalzo MA, Roche J, Molina L, Sánchez I, Lwanga M et al. The economic and nutrition transition in Equatorial Guinea coincided with a double burden of over- and under nutrition. Economics and Human Biology 2010;8:80-87 (and additional analysis).                                   |
| Equatorial Guinea | 2000      | 0-59.99   | National             | 2025        | HAZ, WAZ, WHZ | 1      | MICS                                                                                                                                                                                                                                                                                                 |



| Country           | Year      | Age range | Administrative level | Sample size | Indicators    | Notes* | Survey (when individual level data available) or source (when summary statistics available)                                                                                                                                                                                  |
|-------------------|-----------|-----------|----------------------|-------------|---------------|--------|------------------------------------------------------------------------------------------------------------------------------------------------------------------------------------------------------------------------------------------------------------------------------|
| Equatorial Guinea | 2004      | 0-59.99   | National             | 555         | HAZ, WAZ, WHZ | 2      | Custodio E, Descalzo MA, Roche J, Sánchez I, Molina L, Lwanga M et al. Nutritional status and its correlates in Equatorial Guinean preschool children: Results from a nationally representative survey. Food and Nutrition Bulletin 2008;29:49-58 (and additional analysis). |
| Eritrea           | 1993      | 6-59.99   | National             | NR          | HAZ, WAZ, WHZ | 3,5,7  | Ministry of Finance and Development. Children and women in Eritrea: 1994. Government of the State of Eritrea/UNICEF Situation Analysis. Asmara, Eritrea, 1994 (and additional analysis).                                                                                     |
| Eritrea           | 1995-1996 | 0-35.99   | National             | 2372        | HAZ, WAZ, WHZ | 2      | National Statistics Office [Eritrea] and Macro International Inc. Eritrea demographic and health survey 1995. Demographic and Health Surveys. Calverton, Maryland: National Statistics Office and Macro International Inc, 1997 (and additional analysis).                   |
| Eritrea           | 2002      | 0-59.99   | National             | 5706        | HAZ, WAZ, WHZ | 2      | National Statistics and Evaluation Office (NSEO) [Eritrea] and ORC Macro. Eritrea demographic and health survey 2002. Demographic and Health Surveys. Calverton, Maryland, USA: National Statistics and Evaluation Office and ORC Macro, 2003 (and additional analysis).     |
| Ethiopia          | 2000      | 0-59.99   | National             | 8686        | HAZ, WAZ, WHZ | 1      | DHS                                                                                                                                                                                                                                                                          |
| Ethiopia          | 2005      | 0-59.99   | National             | 3819        | HAZ, WAZ, WHZ | 1      | DHS                                                                                                                                                                                                                                                                          |
| Ethiopia          | 2011      | 0-59.99   | National             | 10883       | HAZ, WAZ, WHZ | 2      | Central Statistical Agency, ICF Macro. Ethiopia Demographic and Health Survey 2011: Preliminary report. Addis Ababa and Calverton, Maryland, USA.: Central Statistical Agency, ICF Macro, 2011.                                                                              |
| Fiji              | 1993      | 0-59.99   | National             | 618         | HAZ, WAZ, WHZ | 3,5    | 1993 National nutrition survey - main report. Suva: National Food and Nutrition Committee, 1995 (and additional analysis).                                                                                                                                                   |
| Gabon             | 2000-2001 | 0-59.99   | National             | 3428        | HAZ, WAZ, WHZ | 1      | DHS                                                                                                                                                                                                                                                                          |
| Gambia            | 1996      | 0-59.99   | National             | 2401        | HAZ, WAZ      | 3,5    | Central Statistics Department [The Gambia], et al. Report of the progress of the mid-decade goals in the Gambia (MICS), 1996. Banjul: The Republic of The Gambia and UNICEF, 1998 (and additional analysis).                                                                 |
| Gambia            | 2000      | 0-59.99   | National             | 2711        | HAZ, WAZ, WHZ | 1      | MICS                                                                                                                                                                                                                                                                         |
| Gambia            | 2005-2006 | 0-59.99   | National             | 6425        | HAZ, WAZ, WHZ | 2      | Gambia Bureau of Statistics (GBoS). The Gambia Multiple Indicator Cluster Survey 2005/2006 Report. Banjul, The Gambia: GBoS, 2007 (and additional analysis).                                                                                                                 |
| Georgia           | 1999      | 0-59.99   | National             | 3434        | HAZ, WAZ, WHZ | 3,5    | Georgia multiple indicator cluster survey 1999 (MICS). Tbilisi, Georgia, 2000 (and additional analysis).                                                                                                                                                                     |
| Georgia           | 2000      | 0-59.99   | Regional             | 3938        | HAZ, WAZ, WHZ | 2      | Save the Children, USAID, NCDC, and CDC. Nutritional status of children less than five years of age in six drought-affected regions of Georgia 2000-2001: Final report. Tbilisi, Georgia: d&p studio, 2002 (and additional analysis).                                        |
| Georgia           | 2005      | 0-59.99   | National             | 1826        | HAZ, WAZ, WHZ | 1      | MICS                                                                                                                                                                                                                                                                         |
| Georgia           | 2009      | 0-59.99   | National             | 3020        | HAZ, WAZ, WHZ | 3      | Georgia National Center for Disease Control and Public Health (NCDC&PH), UNICEF. Report of the Georgia national nutrition survey (GNNS) 2009. Tbilisi, Georgia: NCDC&PH and UNICEF, 2010.                                                                                    |
| Ghana             | 1987-1988 | 0-59.99   | National             | 2949        | HAZ, WAZ, WHZ | 3,5    | Alderman H. Nutritional status in Ghana and its determinants. Living Standards Survey, Ghana 1987-88. Working paper No. 3. Washington, D.C.: The World Bank, 1989 (and additional analysis).                                                                                 |
| Ghana             | 1988      | 3-35.99   | National             | 1967        | HAZ, WAZ, WHZ | 1      | DHS                                                                                                                                                                                                                                                                          |
| Ghana             | 1993-1994 | 0-35.99   | National             | 1873        | HAZ, WAZ, WHZ | 1      | DHS                                                                                                                                                                                                                                                                          |
| Ghana             | 1998-1999 | 0-59.99   | National             | 2741        | HAZ, WAZ, WHZ | 1      | DHS                                                                                                                                                                                                                                                                          |
| Ghana             | 2003      | 0-59.99   | National             | 3072        | HAZ, WAZ, WHZ | 1      | DHS                                                                                                                                                                                                                                                                          |

| Country       | Year      | Age range | Administrative level | Sample size | Indicators    | Notes* | Survey (when individual level data available) or source (when summary statistics available)                                                                                                                                                                                                                                                                                                                                                                                                         |
|---------------|-----------|-----------|----------------------|-------------|---------------|--------|-----------------------------------------------------------------------------------------------------------------------------------------------------------------------------------------------------------------------------------------------------------------------------------------------------------------------------------------------------------------------------------------------------------------------------------------------------------------------------------------------------|
| Ghana         | 2006      | 0-59.99   | National             | 3324        | HAZ, WAZ, WHZ | 1      | MICS                                                                                                                                                                                                                                                                                                                                                                                                                                                                                                |
| Ghana         | 2008      | 0-59.99   | National             | 2367        | HAZ, WAZ, WHZ | 1      | DHS                                                                                                                                                                                                                                                                                                                                                                                                                                                                                                 |
| Guatemala     | 1987      | 3-35.99   | National             | 2218        | HAZ, WAZ, WHZ | 1      | DHS                                                                                                                                                                                                                                                                                                                                                                                                                                                                                                 |
| Guatemala     | 1995      | 0-59.99   | National             | 8446        | HAZ, WAZ, WHZ | 1      | DHS                                                                                                                                                                                                                                                                                                                                                                                                                                                                                                 |
| Guatemala     | 1998-1999 | 0-59.99   | National             | 3862        | HAZ, WAZ, WHZ | 1      | DHS                                                                                                                                                                                                                                                                                                                                                                                                                                                                                                 |
| Guatemala     | 2000      | 0-59.99   | National             | 5415        | HAZ, WAZ, WHZ | 3,5    | Marini A and Gragnolati M. Malnutrition and poverty in Guatemala. Policy Research Working Paper 2967. The World Bank, Latin America and the Caribbean Region, Human Development Sector Unit, 2003 (and additional analysis).<br>RHS Guatemala 2002                                                                                                                                                                                                                                                  |
| Guatemala     | 2002      | 1-59.99   | National             | 6363        | HAZ, WAZ, WHZ | 1      | RHS Guatemala 2008-2009                                                                                                                                                                                                                                                                                                                                                                                                                                                                             |
| Guatemala     | 2008-2009 | 0-59.99   | National             | 10221       | HAZ, WAZ, WHZ | 1      | RHS Guatemala 2008-2009                                                                                                                                                                                                                                                                                                                                                                                                                                                                             |
| Guinea        | 1994-1995 | 3-59.99   | National             | 3542        | HAZ, WAZ, WHZ | 3,5    | Enquête intégrale sur les conditions de vie des ménages avec module budget et consommation (EIBC) 1994-95. Ministère du Plan et de la Coopération, Direction Nationale de la Statistique. Conakry, République de Guinée, 1998.                                                                                                                                                                                                                                                                      |
| Guinea        | 1999      | 0-59.99   | National             | 4264        | HAZ, WAZ, WHZ | 1      | DHS                                                                                                                                                                                                                                                                                                                                                                                                                                                                                                 |
| Guinea        | 2000      | 6-59.99   | National             | 1457        | HAZ, WAZ, WHZ | 3      | Ministère de la Santé Publique, Direction Nationale de la Santé Publique, Section Alimentation-Nutri<br>Enquête nationale sur l'anémie ferriprive en Guinée (rapport final:Version 3.0). Institut de Nutrition et de Santé de l'Enfant, République de Guinée, 2001.                                                                                                                                                                                                                                 |
| Guinea        | 2005      | 0-59.99   | National             | 2615        | HAZ, WAZ, WHZ | 1      | DHS                                                                                                                                                                                                                                                                                                                                                                                                                                                                                                 |
| Guinea        | 2007-2008 | 0-59.99   | National             | 11781       | HAZ, WAZ, WHZ | 2      | Ministère de l'Economie des Finances et du Plan, UNICEF, PAM and Direction Nationale de la Statistique. Enquête nationale sur l'état nutritionnel et le suivi des principaux indicateurs de survie de l'enfant. Rapport provisoire, Mai 2008 (30/12/09 <a href="http://ochaonline.un.org/CoordinationIASC/Securitealimentairenutrition/tabid/5651/language/fr-FR/Default.aspx">http://ochaonline.un.org/CoordinationIASC/Securitealimentairenutrition/tabid/5651/language/fr-FR/Default.aspx</a> ). |
| Guinea-Bissau | 2000      | 0-59.99   | National             | 5359        | HAZ, WAZ, WHZ | 1      | MICS                                                                                                                                                                                                                                                                                                                                                                                                                                                                                                |
| Guinea-Bissau | 2006      | 0-59.99   | National             | 5291        | HAZ, WAZ, WHZ | 2      | Ministère de l'Economie - Secrétariat d'Etat du Plan et à l'Intégration Régionale. Enquête par grappes à indicateurs multiples, Guinée-Bissau, 2006, Rapport final. Bissau, Guinée-Bissau : Ministère de l'Economie - Secrétariat d'Etat du Plan et à l'Intégration Régionale, 2006 (and additional analysis).                                                                                                                                                                                      |
| Guinea-Bissau | 2008      | 0-59.99   | National             | 2710        | HAZ, WAZ, WHZ | 3      | Gouvernement de la Guinée Bissau et UNICEF. Enquête nutritionnel SMART. Evaluation de la situation nutritionnelle en Guinée Bissau: Rapport final, décembre 2008. (30/12/09 <a href="http://ochaonline.un.org/CoordinationIASC/Securitealimentairenutrition/tabid/5651/language/fr-FR/Default.aspx">http://ochaonline.un.org/CoordinationIASC/Securitealimentairenutrition/tabid/5651/language/fr-FR/Default.aspx</a> ).                                                                            |
| Guyana        | 1993      | 0-59.99   | National             | 581         | WAZ           | 3,5    | Guyana Bureau of Statistics. Household income and expenditure survey 1993 and Guyana living standards measurement survey. In: Guyana strategies for reducing poverty. Report No. 12861-GUA. Washington: The World Bank, 1994:50-67 (and additional analysis).                                                                                                                                                                                                                                       |
| Guyana        | 2000      | 0-59.99   | National             | 2491        | HAZ, WAZ, WHZ | 1      | MICS                                                                                                                                                                                                                                                                                                                                                                                                                                                                                                |
| Guyana        | 2006-2007 | 0-59.99   | National             | 2285        | HAZ, WAZ, WHZ | 2      | Bureau of Statistics and UNICEF. Guyana multiple indicator cluster survey 2006, final report. Georgetown, Guyana: Bureau of Statistics and UNICEF, 2008 (and additional analysis).                                                                                                                                                                                                                                                                                                                  |
| Guyana        | 2009      | 0-59.99   | National             | 1551        | HAZ, WAZ, WHZ | 1      | DHS                                                                                                                                                                                                                                                                                                                                                                                                                                                                                                 |

| Country  | Year      | Age range | Administrative level | Sample size | Indicators    | Notes* | Survey (when individual level data available) or source (when summary statistics available)                                                                                                                                                                                       |
|----------|-----------|-----------|----------------------|-------------|---------------|--------|-----------------------------------------------------------------------------------------------------------------------------------------------------------------------------------------------------------------------------------------------------------------------------------|
| Haiti    | 1990      | 3-59.99   | National             | 1843        | HAZ, WAZ, WHZ | 3,5    | Ministry of Public Health and Population. Haiti's nutrition situation in 1990: A report based on anthropometric data of the 1990 nutrition surveys. Port-au-Prince, Haiti, 1993 (and additional analysis).                                                                        |
| Haiti    | 1990      | 3-59.99   | Regional             | 967         | HAZ, WAZ, WHZ | 3,5    | Centres for Disease Control. Nutritional assessment of children in drought-affected areas - Haiti, 1990. Morbidity and Mortality Weekly Report 1991;40:222-225.                                                                                                                   |
| Haiti    | 1994-1995 | 0-59.99   | National             | 2734        | HAZ, WAZ, WHZ | 1      | DHS                                                                                                                                                                                                                                                                               |
| Haiti    | 1995      | 0-59.99   | First admin level    | 388         | HAZ, WAZ, WHZ | 2,5,8  | Nutritional surveillance for programme planning. Haiti 1995 nutrition surveys by department. Port-au-Prince, Haiti, 1997.                                                                                                                                                         |
| Haiti    | 1995      | 0-59.99   | First admin level    | 389         | HAZ, WAZ, WHZ | 2,5,8  | Nutritional surveillance for programme planning. Haiti 1995 nutrition surveys by department. Port-au-Prince, Haiti, 1997.                                                                                                                                                         |
| Haiti    | 1995      | 0-59.99   | First admin level    | 395         | HAZ, WAZ, WHZ | 2,5,8  | Nutritional surveillance for programme planning. Haiti 1995 nutrition surveys by department. Port-au-Prince, Haiti, 1997.                                                                                                                                                         |
| Haiti    | 1995      | 0-59.99   | First admin level    | 394         | HAZ, WAZ, WHZ | 2,5,8  | Nutritional surveillance for programme planning. Haiti 1995 nutrition surveys by department. Port-au-Prince, Haiti, 1997.                                                                                                                                                         |
| Haiti    | 1995      | 0-59.99   | First admin level    | 397         | HAZ, WAZ, WHZ | 2,5,8  | Nutritional surveillance for programme planning. Haiti 1995 nutrition surveys by department. Port-au-Prince, Haiti, 1997.                                                                                                                                                         |
| Haiti    | 1995      | 0-59.99   | First admin level    | 398         | HAZ, WAZ, WHZ | 2,5,8  | Nutritional surveillance for programme planning. Haiti 1995 nutrition surveys by department. Port-au-Prince, Haiti, 1997.                                                                                                                                                         |
| Haiti    | 1995      | 0-59.99   | First admin level    | 396         | HAZ, WAZ, WHZ | 2,5,8  | Nutritional surveillance for programme planning. Haiti 1995 nutrition surveys by department. Port-au-Prince, Haiti, 1997.                                                                                                                                                         |
| Haiti    | 1995      | 0-59.99   | First admin level    | 392         | HAZ, WAZ, WHZ | 2,5,8  | Nutritional surveillance for programme planning. Haiti 1995 nutrition surveys by department. Port-au-Prince, Haiti, 1997.                                                                                                                                                         |
| Haiti    | 1995      | 0-59.99   | First admin level    | 391         | HAZ, WAZ, WHZ | 2,5,8  | Nutritional surveillance for programme planning. Haiti 1995 nutrition surveys by department. Port-au-Prince, Haiti, 1997.                                                                                                                                                         |
| Haiti    | 1995      | 0-59.99   | First admin level    | 385         | HAZ, WAZ, WHZ | 2,5,8  | Nutritional surveillance for programme planning. Haiti 1995 nutrition surveys by department. Port-au-Prince, Haiti, 1997.                                                                                                                                                         |
| Haiti    | 2000      | 0-59.99   | National             | 5502        | HAZ, WAZ, WHZ | 1      | DHS                                                                                                                                                                                                                                                                               |
| Haiti    | 2005-2006 | 0-59.99   | National             | 2524        | HAZ, WAZ, WHZ | 1      | DHS                                                                                                                                                                                                                                                                               |
| Honduras | 1987      | 0-59.99   | National             | 3244        | HAZ, WAZ, WHZ | 3,5    | Barahona F, Soto RJ, Tronconi E, Maradiaga A, O'Connor G, Corrales G. Encuesta nacional de nutrición, Honduras, 1987. Cuadros de frecuencias por regiones de salud y nacionales. Ministerio de Salud Pública. Tegucigalpa, Republica de Honduras, 1988 (and additional analysis). |
| Honduras | 1991-1992 | 0-59.99   | National             | 5961        | HAZ, WAZ, WHZ | 3,5    | Ministerio de Salud Pública. Encuesta nacional de epidemiología y salud familiar (ENESF), 1991/92. Tegucigalpa, Republica de Honduras, 1993 (and additional analysis).                                                                                                            |
| Honduras | 1993-1994 | 0-59.99   | National             | 1875        | HAZ, WAZ, WHZ | 3,5    | National survey of socio-economic indicators 1993/94. Tegucigalpa, Republica de Honduras, 1996 (and additional analysis).                                                                                                                                                         |
| Honduras | 1996      | 12-59.99  | National             | 1455        | HAZ, WAZ, WHZ | 2      | Ministry of Health. National micronutrient survey Honduras 1996. Tegucigalpa, Republic of Honduras, 1997 (and additional analysis).                                                                                                                                               |
| Honduras | 2001      | 1-59.99   | National             | 5624        | HAZ, WAZ, WHZ | 1      | RHS Honduras 2001                                                                                                                                                                                                                                                                 |
| Honduras | 2005-2006 | 0-59.99   | National             | 9200        | HAZ, WAZ, WHZ | 1      | DHS                                                                                                                                                                                                                                                                               |
| India    | 1988-1990 | 0-59.99   | Regional             | 13548       | HAZ, WAZ, WHZ | 3,5    | National Institute of Nutrition. National Nutrition Monitoring Bureau, 1988-90 (8 States pooled data). Hyderabad, India; 1993 (data reanalyzed for WHO).                                                                                                                          |
| India    | 1992-1993 | 0-47.99   | National             | 26565       | HAZ, WAZ, WHZ | 1      | DHS                                                                                                                                                                                                                                                                               |

| Country   | Year      | Age range | Administrative level | Sample size | Indicators    | Notes* | Survey (when individual level data available) or source (when summary statistics available)                                                                                                                                                                                                                                                                                                          |
|-----------|-----------|-----------|----------------------|-------------|---------------|--------|------------------------------------------------------------------------------------------------------------------------------------------------------------------------------------------------------------------------------------------------------------------------------------------------------------------------------------------------------------------------------------------------------|
| India     | 1995-1996 | 12-59.99  | Regional             | 46457       | HAZ, WAZ, WHZ | 3,5    | Government of India. India nutrition profile. Department of Women and Child Development. Ministry of Human Resource Development. New Delhi, India, 1998.                                                                                                                                                                                                                                             |
| India     | 1998-2000 | 0-35.99   | National             | 24605       | HAZ, WAZ, WHZ | 1      | DHS                                                                                                                                                                                                                                                                                                                                                                                                  |
| India     | 2005-2006 | 0-59.99   | National             | 40951       | HAZ, WAZ, WHZ | 1      | DHS                                                                                                                                                                                                                                                                                                                                                                                                  |
| Indonesia | 1987      | 0-59.99   | National             | 28169       | WAZ           | 3,5    | National socioeconomic survey 1987 (SUSENAS-1987). Central Bureau of Statistics. Jakarta, Indonesia, 1992 (and additional analysis).                                                                                                                                                                                                                                                                 |
| Indonesia | 1989      | 0-59.99   | National             | 14101       | WAZ           | 2      | Atmarita, Jahari AB, Latief D, Soekirman, Tilden RL. The effect of economic crisis on the nutritional status of Indonesian pre-school children. Gizi Indonesia 2000;33-41 (and additional analysis), and <a href="http://www.gizi.net">http://www.gizi.net</a> , accessed 18/12/03.                                                                                                                  |
| Indonesia | 1992      | 0-59.99   | National             | 33742       | WAZ           | 2      | Atmarita, Jahari AB, Latief D, Soekirman, Tilden RL. The effect of economic crisis on the nutritional status of Indonesian pre-school children. Gizi Indonesia 2000;33-41 (and additional analysis), and <a href="http://www.gizi.net">http://www.gizi.net</a> , accessed 18/12/03.                                                                                                                  |
| Indonesia | 1993      | 0-59.99   | Regional             | 2410        | HAZ, WAZ, WHZ | 1      | IFLS 1                                                                                                                                                                                                                                                                                                                                                                                               |
| Indonesia | 1995      | 0-59.99   | National             | 9227        | HAZ, WAZ, WHZ | 3,5    | Indonesia multiple indicator cluster survey (MICS) 1995. Jakarta: UNICEF, 1997 (preliminary results provided by the Centers for Disease Control and Prevention; and additional analysis).                                                                                                                                                                                                            |
| Indonesia | 1995      | 0-59.99   | National             | 26073       | WAZ           | 2      | National socioeconomic survey (SUSENAS) 1995. Central Bureau of Statistics. Jakarta, Indonesia, 1998 (and additional analysis).                                                                                                                                                                                                                                                                      |
| Indonesia | 1997      | 0-59.99   | Regional             | 2522        | HAZ, WAZ, WHZ | 1      | IFLS 2                                                                                                                                                                                                                                                                                                                                                                                               |
| Indonesia | 1998      | 0-59.99   | National             | 25505       | WAZ           | 2      | Atmarita, Jahari AB, Latief D, Soekirman, Tilden RL. The effect of economic crisis on the nutritional status of Indonesian pre-school children. Gizi Indonesia 2000;33-41 (and additional analysis), and <a href="http://www.gizi.net">http://www.gizi.net</a> , accessed 18/12/03.                                                                                                                  |
| Indonesia | 1999      | 0-59.99   | National             | 78849       | WAZ           | 2      | Atmarita, Jahari AB, Latief D, Soekirman, Tilden RL. The effect of economic crisis on the nutritional status of Indonesian pre-school children. Gizi Indonesia 2000;33-41 (and additional analysis), and <a href="http://www.gizi.net">http://www.gizi.net</a> , accessed 18/12/03.                                                                                                                  |
| Indonesia | 2000      | 0-59.99   | Regional             | 3777        | HAZ, WAZ, WHZ | 1      | IFLS 3                                                                                                                                                                                                                                                                                                                                                                                               |
| Indonesia | 2000      | 0-59.99   | National             | 106147      | HAZ, WAZ, WHZ | 2      | New Insight on the Health & Nutrition Situation in Indonesia through Data Sharing: Annual Report 2000-2001. Summary: Second Annual Report of the Nutrition and Health Surveillance System in Indonesia with data from the period 2000-2001, <a href="http://www.hki.org/research/nutrition_surveillance.html">http://www.hki.org/research/nutrition_surveillance.html</a> (and additional analysis). |
| Indonesia | 2000      | 0-59.99   | National             | 70591       | WAZ           | 2      | Atmarita, Jahari AB, Latief D, Soekirman, Tilden RL. The effect of economic crisis on the nutritional status of Indonesian pre-school children. Gizi Indonesia 2000;33-41 (and additional analysis), and <a href="http://www.gizi.net">http://www.gizi.net</a> , accessed 18/12/03.                                                                                                                  |
| Indonesia | 2001      | 0-59.99   | National             | 96417       | HAZ, WAZ, WHZ | 2      | New Insight on the Health & Nutrition Situation in Indonesia through Data Sharing: Annual Report 2000-2001. Summary: Second Annual Report of the Nutrition and Health Surveillance System in Indonesia with data from the period 2000-2001, <a href="http://www.hki.org/research/nutrition_surveillance.html">http://www.hki.org/research/nutrition_surveillance.html</a> (and additional analysis). |
| Indonesia | 2001      | 0-59.99   | National             | 11678       | WAZ           | 2      | Atmarita, Tilden R, Noor Nasty Nur, Ascobat Gani, Widjajanto RM. Indonesian nutritional status of children 1989-2005: Poverty and household food security, dietary diversity and infection: which is the most important risk? Gizi Indonesia 2005;28: (and additional analysis).                                                                                                                     |

| Country                    | Year | Age range | Administrative level | Sample size | Indicators    | Notes* | Survey (when individual level data available) or source (when summary statistics available)                                                                                                                                                                                       |
|----------------------------|------|-----------|----------------------|-------------|---------------|--------|-----------------------------------------------------------------------------------------------------------------------------------------------------------------------------------------------------------------------------------------------------------------------------------|
| Indonesia                  | 2002 | 0-59.99   | National             | 74360       | WAZ           | 2      | Atmarita, Tilden R, Noor Nastry Nur, Ascobat Gani, Widjajanto RM. Indonesian nutritional status of children 1989-2005: Poverty and household food security, dietary diversity and infection: which is the most important risk? Gizi Indonesia 2005;28: (and additional analysis). |
| Indonesia                  | 2003 | 0-59.99   | National             | 77110       | WAZ           | 2      | National socioeconomic survey 2003 (SUSENAS-2003). Central Bureau of Statistics. Jakarta, Indonesia, 2006 (and additional analysis).                                                                                                                                              |
| Indonesia                  | 2004 | 0-59.99   | National             | 3116        | HAZ, WAZ, WHZ | 2      | Ministry of Health. National Institute of Health Research and Development, 2005. National Household Health Survey (SKRT) 2004, Volume 2: Community Health Status in Indonesia. Jakarta, Indonesia, 2007 (and additional analysis).                                                |
| Indonesia                  | 2005 | 0-59.99   | National             | 94652       | WAZ           | 2      | National socioeconomic survey 2005 (SUSENAS-2005). Central Bureau of Statistics. Jakarta, Indonesia, 2006 (and additional analysis).                                                                                                                                              |
| Indonesia                  | 2007 | 0-59.99   | Regional             | 4612        | HAZ, WAZ, WHZ | 1      | IFLS 4                                                                                                                                                                                                                                                                            |
| Indonesia                  | 2007 | 0-59.99   | National             | 77808       | HAZ, WAZ, WHZ | 2      | Ministry of Health and National Institute of Health Research and Development. Basic Health Survey, Riskesdas, 2007. Results to be presented at the ICN in Bangkok, October 2009: "Changes in malnutrition from 1989 to 2007 in Indonesia" by Ita Atmarita, Ministry of Health.    |
| Iran (Islamic Republic of) | 1995 | 0-59.99   | National             | 11139       | HAZ, WAZ, WHZ | 3,5    | Undersecretary for Public Affairs, Ministry of Health and Medical Education. Cluster survey for evaluation of mid decade goal indicators (MICS). Theran, Islamic Republic of Iran, April 1996 (and additional analysis).                                                          |
| Iran (Islamic Republic of) | 1998 | 0-59.99   | National             | 2536        | HAZ, WAZ, WHZ | 3,5    | The nutritional status of children, October-November 1998 (ANIS). Teheran: Ministry of Health and Medical Education and UNICEF, 2000 (and additional analysis).                                                                                                                   |
| Iran (Islamic Republic of) | 2001 | 13-28.99  | National             | 8432        | HAZ, WAZ, WHZ | 1      | Iran Micronutrient Survey 2001                                                                                                                                                                                                                                                    |
| Iraq                       | 1991 | 0-59.99   | Regional             | 680         | HAZ, WAZ, WHZ | 3,5    | Field JO, Russell RM. Nutrition mission to Iraq for UNICEF. Nutrition Reviews 1992;50:41-46.                                                                                                                                                                                      |
| Iraq                       | 1991 | 0-59.99   | National             | 2565        | HAZ, WAZ, WHZ | 3,5    | International Study Team. Infant and child mortality and nutritional status of Iraqi children after the Gulf conflict: Results of a community-based study. Center for Population and Development Studies, Harvard University, Cambridge, MA, USA; 1992 (and additional analysis). |
| Iraq                       | 1996 | 0-59.99   | Regional             | 6392        | HAZ, WAZ, WHZ | 3,5    | The 1996 multiple indicator cluster survey: a survey to assess the situation of children and women in Iraq (MICS). Central Statistical Organizations and UNICEF. Baghdad, Iraq 1997.                                                                                              |
| Iraq                       | 1997 | 0-59.99   | Regional             | 2248        | HAZ, WAZ, WHZ | 3,5    | Ministry of Health and Social Welfare and UNICEF/Iraq. Nutritional status of children under five in the Autonomous Northern Region, Iraq. Baghdad, Iraq, 1998 (pre-final draft).                                                                                                  |
| Iraq                       | 1997 | 0-11.99   | Regional             | 3102        | HAZ, WAZ, WHZ | 3,4,5  | Ministry of Health and UNICEF/Iraq. Nutritional status survey of infants in Iraq (excluding the Autonomous Northern Governorates) - final report. Baghdad, Iraq, 1997.                                                                                                            |
| Iraq                       | 1998 | 0-11.99   | Regional             | 3622        | HAZ, WAZ, WHZ | 3,4,5  | Nutritional status survey of infants in Iraq (15 governorates in the South/Centre). Baghdad, Iraq, 1998.                                                                                                                                                                          |
| Iraq                       | 1998 | 0-59.99   | Regional             | 13892       | HAZ, WAZ, WHZ | 3,4,5  | Nutritional status survey of infants in Iraq (15 governorates in the South/Centre). Baghdad, Iraq, 1998.                                                                                                                                                                          |
| Iraq                       | 1999 | 0-59.99   | Regional             | 13738       | HAZ, WAZ, WHZ | 3,4,5  | Ministry of Health and UNICEF/Iraq. Nutrition survey in primary health centres on polio national immunization days in centre/south Iraq (final draft). Baghdad, Iraq, 1999.                                                                                                       |
| Iraq                       | 1999 | 0-23.99   | Regional             | 6414        | HAZ, WAZ, WHZ | 3,4,5  | Ministry of Health and UNICEF. Nutrition survey of children under two attending routine immunization sessions at primary health care centres in Iraq. Baghdad, Iraq, 1999.                                                                                                        |

| Country | Year | Age range | Administrative level | Sample size | Indicators    | Notes* | Survey (when individual level data available) or source (when summary statistics available)                                                                                                                                                                                                                                              |
|---------|------|-----------|----------------------|-------------|---------------|--------|------------------------------------------------------------------------------------------------------------------------------------------------------------------------------------------------------------------------------------------------------------------------------------------------------------------------------------------|
| Iraq    | 2000 | 0-59.99   | National             | 13861       | HAZ, WAZ, WHZ | 1      | MICS                                                                                                                                                                                                                                                                                                                                     |
| Iraq    | 2002 | 0-59.99   | Regional             | 24489       | HAZ, WAZ, WHZ | 3,5    | Ministry of Health, Directorate of Preventive Health, Nutrition Research Institute, Ministry of Planning, Central Statistical Organisation and UNICEF. Integrated nutritional status survey of under five years and breastfeeding/ complementary feeding practices of under two years in South/Center Iraq. Baghdad, Iraq: UNICEF, 2002. |
| Iraq    | 2003 | 0-59.99   | National             | NR          | HAZ, WAZ, WHZ | 3,5,7  | Baseline food security analysis in Iraq. Baghdad, Iraq: WFP Iraq Country Office, September 2004 (and additional analysis).                                                                                                                                                                                                               |
| Iraq    | 2004 | 0-59.99   | National             | 16464       | HAZ, WAZ, WHZ | 3,5    | Iraq living conditions survey 2004. Volume 1: Tabulation report. Baghdad, Iraq: Central Organization for Statistics and Information Technology, Ministry of Planning and Development Cooperation, 2005 (and additional analysis).                                                                                                        |
| Iraq    | 2006 | 0-59.99   | National             | 16309       | HAZ, WAZ, WHZ | 2      | Central Organization for Statistics & Information Technology and Kurdistan Regional Statistical Office. Iraq multiple indicator cluster survey 2006, Final report. Iraq, 2007 (and additional analysis).                                                                                                                                 |
| Jamaica | 1989 | 0-59.99   | National             | 860         | HAZ, WAZ, WHZ | 3,5    | Jamaica Living Standards and Measurement Survey 1989. Kingston: The World Bank, 1990 (and additional analysis).                                                                                                                                                                                                                          |
| Jamaica | 1991 | 0-59.99   | National             | 358         | HAZ, WAZ, WHZ | 3,5,8  | Jamaica survey of living conditions - report 1991. Kingston: The Planning Institute and the Statistical Institute of Jamaica, 1992 (and additional analysis).                                                                                                                                                                            |
| Jamaica | 1992 | 0-59.99   | National             | 1327        | HAZ, WAZ, WHZ | 3,5    | Jamaica survey of living conditions 1992. Kingston: The Planning Institute and the Statistical Institute of Jamaica, 1994 (and additional analysis).                                                                                                                                                                                     |
| Jamaica | 1993 | 0-59.99   | National             | 663         | HAZ, WAZ, WHZ | 3,5    | Jamaica survey of living conditions 1993. Kingston: The Planning Institute and the Statistical Institute of Jamaica, 1995 (and additional analysis).                                                                                                                                                                                     |
| Jamaica | 1994 | 0-59.99   | National             | 982         | HAZ, WAZ, WHZ | 2      | Jamaica survey of living conditions, 1994. Kingston: The Planning Institute and the Statistical Institute of Jamaica, 1996 (and additional analysis).                                                                                                                                                                                    |
| Jamaica | 1995 | 0-59.99   | National             | 959         | HAZ, WAZ, WHZ | 2      | Jamaica survey of living conditions, 1995. Kingston: The Planning Institute and the Statistical Institute of Jamaica, 1997 (and additional analysis).                                                                                                                                                                                    |
| Jamaica | 1996 | 0-59.99   | National             | 1002        | HAZ, WAZ, WHZ | 2      | Jamaica survey of living conditions, 1996. Kingston: The Planning Institute and the Statistical Institute of Jamaica, 1997 (and additional analysis).                                                                                                                                                                                    |
| Jamaica | 1997 | 0-59.99   | National             | 933         | HAZ, WAZ, WHZ | 2      | Jamaica survey of living conditions, 1997. Kingston: The Planning Institute and the Statistical Institute of Jamaica, 1998 (and additional analysis).                                                                                                                                                                                    |
| Jamaica | 1998 | 0-59.99   | National             | 3142        | HAZ, WAZ, WHZ | 2      | Jamaica survey of living conditions, 1998. Kingston: The Planning Institute and the Statistical Institute of Jamaica, 1999 (and additional analysis).                                                                                                                                                                                    |
| Jamaica | 1999 | 0-59.99   | National             | 810         | HAZ, WAZ, WHZ | 2      | Jamaica survey of living conditions, 1999. Kingston: The Planning Institute and the Statistical Institute of Jamaica, 2000 (and additional analysis).                                                                                                                                                                                    |
| Jamaica | 2000 | 0-59.99   | National             | 774         | HAZ, WAZ, WHZ | 2      | Jamaica survey of living conditions data set 2000. The Planning Institute and the Statistical Institute of Jamaica, 2001 (and additional analysis).                                                                                                                                                                                      |
| Jamaica | 2001 | 0-59.99   | National             | 629         | HAZ, WAZ, WHZ | 2      | Jamaica survey of living conditions data set 2001. The Planning Institute and the Statistical Institute of Jamaica, 2002 (and additional analysis).                                                                                                                                                                                      |
| Jamaica | 2002 | 0-59.99   | National             | 3274        | HAZ, WAZ, WHZ | 2      | Jamaica survey of living conditions data set 2002. The Planning Institute and the Statistical Institute of Jamaica, 2003 (and additional analysis).                                                                                                                                                                                      |
| Jamaica | 2004 | 0-59.99   | National             | 793         | HAZ, WAZ, WHZ | 2      | Jamaica survey of living conditions data set 2004. The Planning Institute and the Statistical Institute of Jamaica, 2005 (and additional analysis).                                                                                                                                                                                      |
| Jamaica | 2006 | 0-59.99   | National             | 454         | HAZ, WAZ, WHZ | 3,5    | Jamaica survey of living conditions data set 2006. The Planning Institute and the Statistical Institute of Jamaica, 2009 (and additional analysis).                                                                                                                                                                                      |
| Jamaica | 2007 | 0-59.99   | National             | 500         | HAZ, WAZ, WHZ | 3,5    | Jamaica survey of living conditions data set 2007. The Planning Institute and the Statistical Institute of Jamaica, 2009 (and additional analysis).                                                                                                                                                                                      |
| Jordan  | 1990 | 0-59.99   | National             | 6596        | HAZ, WAZ, WHZ | 1      | DHS                                                                                                                                                                                                                                                                                                                                      |

| Country    | Year      | Age range | Administrative level | Sample size | Indicators    | Notes* | Survey (when individual level data available) or source (when summary statistics available)                                                                                                                                                       |
|------------|-----------|-----------|----------------------|-------------|---------------|--------|---------------------------------------------------------------------------------------------------------------------------------------------------------------------------------------------------------------------------------------------------|
| Jordan     | 1991      | 0-59.99   | National             | 8113        | HAZ, WAZ, WHZ | 3,5    | Ministry of Health. Assessment of the nutritional status of preschool children in Jordan. Amman: Department of Statistics, 1993.                                                                                                                  |
| Jordan     | 1997      | 0-59.99   | National             | 5578        | HAZ, WAZ, WHZ | 1      | DHS                                                                                                                                                                                                                                               |
| Jordan     | 2002      | 0-59.99   | National             | 4858        | HAZ, WAZ, WHZ | 1      | DHS                                                                                                                                                                                                                                               |
| Jordan     | 2007      | 0-59.99   | National             | 4371        | HAZ, WAZ, WHZ | 1      | DHS                                                                                                                                                                                                                                               |
| Jordan     | 2009      | 0-59.99   | National             | 4354        | HAZ, WAZ, WHZ | 1      | DHS                                                                                                                                                                                                                                               |
| Kazakhstan | 1995      | 0-35.99   | National             | 733         | HAZ, WAZ, WHZ | 1      | DHS                                                                                                                                                                                                                                               |
| Kazakhstan | 1999      | 0-59.99   | National             | 565         | HAZ, WAZ, WHZ | 1      | DHS                                                                                                                                                                                                                                               |
| Kazakhstan | 2006      | 0-59.99   | National             | 4227        | HAZ, WAZ, WHZ | 1      | MICS                                                                                                                                                                                                                                              |
| Kenya      | 1993      | 0-59.99   | National             | 4880        | HAZ, WAZ, WHZ | 1      | DHS                                                                                                                                                                                                                                               |
| Kenya      | 1994      | 6-59.99   | National             | 8944        | HAZ, WAZ, WHZ | 3,5    | Central Bureau of Statistics. Fifth child nutrition survey, 1994. Welfare monitoring survey. Nairobi, Kenya, 1995.                                                                                                                                |
| Kenya      | 1998      | 0-35.99   | National             | 2887        | HAZ, WAZ, WHZ | 1      | DHS                                                                                                                                                                                                                                               |
| Kenya      | 2000      | 0-59.99   | National             | 6091        | HAZ, WAZ, WHZ | 1      | MICS                                                                                                                                                                                                                                              |
| Kenya      | 2003      | 0-59.99   | National             | 4689        | HAZ, WAZ, WHZ | 1      | DHS                                                                                                                                                                                                                                               |
| Kenya      | 2005-2006 | 6-59.99   | National             | 9985        | HAZ, WAZ, WHZ | 3,5    | Kenya integrated household budget survey (KIHBS), 2006/06: Revised edition, basic report. Nairobi, Kenya 2006 (and additional analysis).                                                                                                          |
| Kenya      | 2008-2009 | 0-59.99   | National             | 5058        | HAZ, WAZ, WHZ | 1      | DHS                                                                                                                                                                                                                                               |
| Kiribati   | 1985      | 0-59.99   | National             | 2941        | HAZ, WAZ, WHZ | 3,5    | Ministry of Health and Family Planning. National nutrition survey, 1985. Government of Kiribati. South Tarawa, Republic of Kiribati, 1990 (draft version; and additional analysis).                                                               |
| Kuwait     | 1994-1995 | 6-59.99   | National             | 1280        | HAZ, WAZ, WHZ | 3,5    | Amine EK, Al-Awadi FA. Nutritional status survey of preschool children in Kuwait. Eastern Mediterranean Health Journal 1996;2:386-394.                                                                                                            |
| Kuwait     | 1996-1997 | 0-59.99   | National             | 12376       | HAZ, WAZ, WHZ | 3,4,5  | Kuwait national nutritional surveillance system. Nutrition unit, Ministry of Health. Al Shaab, Kuwait, 1998 (and additional analysis).                                                                                                            |
| Kuwait     | 2001      | 0-59.99   | National             | 4878        | HAZ, WAZ, WHZ | 2,4    | Administration of Food and Nutrition, Ministry of Health. Kuwait nutrition surveillance system, 2005 report: 2001-2005 trends. Kuwait, State of Kuwait: Administration of Food and Nutrition, Ministry of Health, 2006 (and additional analysis). |
| Kuwait     | 2002      | 0-59.99   | National             | 3842        | HAZ, WAZ, WHZ | 2,4    | Administration of Food and Nutrition, Ministry of Health. Kuwait nutrition surveillance system, 2005 report: 2001-2005 trends. Kuwait, State of Kuwait: Administration of Food and Nutrition, Ministry of Health, 2006 (and additional analysis). |
| Kuwait     | 2003      | 0-59.99   | National             | 4308        | HAZ, WAZ, WHZ | 2,4    | Administration of Food and Nutrition, Ministry of Health. Kuwait nutrition surveillance system, 2005 report: 2001-2005 trends. Kuwait, State of Kuwait: Administration of Food and Nutrition, Ministry of Health, 2006 (and additional analysis). |
| Kuwait     | 2004      | 0-59.99   | National             | 4381        | HAZ, WAZ, WHZ | 2,4    | Administration of Food and Nutrition, Ministry of Health. Kuwait nutrition surveillance system, 2005 report: 2001-2005 trends. Kuwait, State of Kuwait: Administration of Food and Nutrition, Ministry of Health, 2006 (and additional analysis). |
| Kuwait     | 2005      | 0-59.99   | National             | 5601        | HAZ, WAZ, WHZ | 2,4    | Administration of Food and Nutrition, Ministry of Health. Kuwait nutrition surveillance system, 2005 report: 2001-2005 trends. Kuwait, State of Kuwait: Administration of Food and Nutrition, Ministry of Health, 2006 (and additional analysis). |
| Kuwait     | 2006      | 0-59.99   | National             | 3422        | HAZ, WAZ, WHZ | 2,4    | Administration of Food and Nutrition, Ministry of Health. Kuwait nutrition surveillance system: 2006-2009 trends. Kuwait, State of Kuwait: Administration of Food and Nutrition, Ministry of Health, 2010 (and additional analysis).              |

| Country                          | Year      | Age range | Administrative level | Sample size | Indicators    | Notes* | Survey (when individual level data available) or source (when summary statistics available)                                                                                                                                                              |
|----------------------------------|-----------|-----------|----------------------|-------------|---------------|--------|----------------------------------------------------------------------------------------------------------------------------------------------------------------------------------------------------------------------------------------------------------|
| Kuwait                           | 2007      | 0-59.99   | National             | 3949        | HAZ, WAZ, WHZ | 2,4    | Administration of Food and Nutrition, Ministry of Health. Kuwait nutrition surveillance system: 2006-2009 trends. Kuwait, State of Kuwait: Administration of Food and Nutrition, Ministry of Health, 2010 (and additional analysis).                     |
| Kuwait                           | 2008      | 0-59.99   | National             | 4199        | HAZ, WAZ, WHZ | 2,4    | Administration of Food and Nutrition, Ministry of Health. Kuwait nutrition surveillance system: 2006-2009 trends. Kuwait, State of Kuwait: Administration of Food and Nutrition, Ministry of Health, 2010 (and additional analysis).                     |
| Kuwait                           | 2009      | 0-59.99   | National             | 4099        | HAZ, WAZ, WHZ | 2,4    | Administration of Food and Nutrition, Ministry of Health. Kuwait nutrition surveillance system: 2006-2009 trends. Kuwait, State of Kuwait: Administration of Food and Nutrition, Ministry of Health, 2010 (and additional analysis).                     |
| Kyrgyzstan                       | 1997      | 0-35.99   | National             | 963         | HAZ, WAZ, WHZ | 1      | DHS                                                                                                                                                                                                                                                      |
| Kyrgyzstan                       | 2005-2006 | 0-59.99   | National             | 2875        | HAZ, WAZ, WHZ | 1      | MICS                                                                                                                                                                                                                                                     |
| Lao People's Democratic Republic | 1986      | 0-59.99   | Regional             | 6967        | HAZ           | 3,5    | Vijayaraghavan K. A nutritional surveillance report for the Lao People's Democratic Republic. Assignment Report (WP)NUT/LAO/NUT/001-E. Geneva: World Health Organization, 1988.                                                                          |
| Lao People's Democratic Republic | 1993      | 0-59.99   | National             | 1365        | HAZ, WAZ, WHZ | 3,5    | Ministry of Public Health. Women and children in the Lao People's Democratic Republic. Results from the LAO social indicator survey (LSIS). Vientiane: Mother and Child Institute, 1994 (and additional analysis).                                       |
| Lao People's Democratic Republic | 1994      | 0-59.99   | National             | 2950        | HAZ, WAZ, WHZ | 3,5    | Diagnostic de la situation nutritionnel et consommation alimentaire au Laos. Rapport complet de l'étude sur l'état nutritionnel de la population Laotienne. ESNA: TCP/LAO/2354. Rome: Food and Agriculture Organization, 1995 (and additional analysis). |
| Lao People's Democratic Republic | 2000      | 0-59.99   | National             | 1444        | HAZ, WAZ, WHZ | 1      | MICS                                                                                                                                                                                                                                                     |
| Lao People's Democratic Republic | 2006      | 0-59.99   | National             | 3976        | HAZ, WAZ, WHZ | 1      | MICS                                                                                                                                                                                                                                                     |
| Lebanon                          | 1996      | 0-59.99   | National             | 1782        | HAZ, WAZ, WHZ | 1      | PAPCHILD Lebanon                                                                                                                                                                                                                                         |
| Lebanon                          | 2004      | 0-59.99   | National             | 1127        | HAZ, WAZ, WHZ | 2      | The Arab League and the Republic of Lebanon. Lebanon family health survey 2004: Principal report. Tutelian M, Khayyat M, Monem AA, eds. The Pan Arab Project for Family Health, 2006 (additional analysis conducted by PAPFAM).                          |
| Lesotho                          | 1992      | 0-59.99   | National             | 4687        | HAZ, WAZ, WHZ | 3,5    | Ministries of Health and Agriculture. National nutrition survey report, May-June 1992. Maseru, Kingdom of Lesotho, 1992 (and additional analysis).                                                                                                       |
| Lesotho                          | 1994      | 24-59.99  | National             | 449         | HAZ, WAZ, WHZ | 3,5    | Ministry of Health. National survey on iodine, vitamin A and iron status of women and children in Lesotho. Maseru, Lesotho, 1994.                                                                                                                        |
| Lesotho                          | 1996      | 0-59.99   | National             | 2823        | HAZ, WAZ, WHZ | 3,5    | Spring CA. Mid-decade goals: progress towards the world summit, May 1996 (MICS). Maseru: Bureau of Statistics and UNICEF, 1996.                                                                                                                          |
| Lesotho                          | 2000      | 0-59.99   | National             | 3042        | HAZ, WAZ, WHZ | 1      | MICS                                                                                                                                                                                                                                                     |
| Lesotho                          | 2004-2005 | 0-59.99   | National             | 1353        | HAZ, WAZ, WHZ | 1      | DHS                                                                                                                                                                                                                                                      |
| Lesotho                          | 2009-2010 | 0-59.99   | National             | 1600        | HAZ, WAZ, WHZ | 1      | DHS                                                                                                                                                                                                                                                      |
| Liberia                          | 1999-2000 | 0-59.99   | National             | 4701        | HAZ, WAZ, WHZ | 2      | Ministry of Health and Social Welfare, UNICEF, Christian Health Association of Liberia. Liberia national nutrition survey 1999-2000. Monrovia, Liberia, 2001 (and additional analysis).                                                                  |
| Liberia                          | 2006-2007 | 0-59.99   | National             | 4311        | HAZ, WAZ, WHZ | 1      | DHS                                                                                                                                                                                                                                                      |
| Libyan Arab Jamahiriya           | 1995      | 0-59.99   | National             | 4440        | HAZ, WAZ, WHZ | 1      | PAPCHILD Libyan Arab Jamahiriya                                                                                                                                                                                                                          |



| Country                | Year      | Age range | Administrative level | Sample size | Indicators    | Notes* | Survey (when individual level data available) or source (when summary statistics available)                                                                                                                                                                                         |
|------------------------|-----------|-----------|----------------------|-------------|---------------|--------|-------------------------------------------------------------------------------------------------------------------------------------------------------------------------------------------------------------------------------------------------------------------------------------|
| Libyan Arab Jamahiriya | 2007      | 0-59.99   | National             | 10724       | HAZ, WAZ, WHZ | 2      | National Center for Infectious and Chronic Disease Control [Jamahiriya] and Pan-Arab Project for Family Health. National Libyan family health survey, PAFAM surveys. Cairo: The league of Arab States, 2008 (and additional analysis conducted by PAFAM).                           |
| Madagascar             | 1985      | 0-59.99   | Regional             | 1000        | HAZ, WAZ, WHZ | 3,5    | Ministère de la Recherche Scientifique et Technologique pour le Developpement. Synthèse des données existantes sur l'état nutritionnel à Madagascar. Antananarivo, Madagascar, 1990.                                                                                                |
| Madagascar             | 1986      | 0-59.99   | Regional             | 1000        | HAZ, WAZ, WHZ | 3,5    | Ministère de la Recherche Scientifique et Technologique pour le Developpement. Synthèse des données existantes sur l'état nutritionnel à Madagascar. Antananarivo, Madagascar, 1990.                                                                                                |
| Madagascar             | 1992      | 0-59.99   | National             | 4116        | HAZ, WAZ, WHZ | 1      | DHS                                                                                                                                                                                                                                                                                 |
| Madagascar             | 1993-1994 | 3-59.99   | National             | 3131        | HAZ, WAZ, WHZ | 3,5    | Institut National de la Statistique. Enquête permanente aupres des menages - rapport principal, décembre 1995. Antananarivo, Madagascar, 1995 (and additional analysis).                                                                                                            |
| Madagascar             | 1995      | 0-59.99   | National             | 5049        | HAZ, WAZ, WHZ | 3,5    | Institut National de la Statistique et UNICEF. Enquête par grappes a indicateurs multiples [multiple indicators cluster survey (MICS)], Madagascar 1995 (rapport préliminaires). Antananarivo, Madagascar: Institut National de la Statistique et UNICEF, 1996.                     |
| Madagascar             | 1997      | 0-35.99   | National             | 2989        | HAZ, WAZ, WHZ | 1      | DHS                                                                                                                                                                                                                                                                                 |
| Madagascar             | 2003-2004 | 0-59.99   | National             | 4406        | HAZ, WAZ, WHZ | 1      | DHS                                                                                                                                                                                                                                                                                 |
| Madagascar             | 2008-2009 | 0-59.99   | National             | 4840        | HAZ, WAZ, WHZ | 1      | DHS                                                                                                                                                                                                                                                                                 |
| Malawi                 | 1992      | 0-59.99   | National             | 3177        | HAZ, WAZ, WHZ | 1      | DHS                                                                                                                                                                                                                                                                                 |
| Malawi                 | 1995      | 6-59.99   | National             | 3654        | HAZ, WAZ, WHZ | 3,5    | Ministry of Economic Planning and Development. Malawi social indicators survey 1995. MICS surveys. National Statistical Office and the Centre for Social Research. Lilongwe, Malawi, 1996 (and additional analysis).                                                                |
| Malawi                 | 1997-1998 | 6-59.99   | National             | 639         | HAZ, WAZ, WHZ | 3,5    | Government of Malawi. A relative profile of poverty in Malawi, 1998: A quintile-based poverty analysis of the Malawi integrated household survey, 1997-98. Poverty Monitoring System. Copied from www.nso.malawi.net; accessed 26/05/03 (and additional analysis).                  |
| Malawi                 | 2000      | 0-59.99   | National             | 9083        | HAZ, WAZ, WHZ | 1      | DHS                                                                                                                                                                                                                                                                                 |
| Malawi                 | 2004-2005 | 0-59.99   | National             | 7967        | HAZ, WAZ, WHZ | 1      | DHS                                                                                                                                                                                                                                                                                 |
| Malawi                 | 2006      | 0-59.99   | National             | 21207       | HAZ, WAZ, WHZ | 1      | MICS                                                                                                                                                                                                                                                                                |
| Malawi                 | 2009      | 6-59.99   | National             | 981         | HAZ, WAZ, WHZ | 3      | UNICEF and CDC. The national micronutrient survey 2009. Lilongwe, Malawi: Ministry of Health, UNICEF, Irish Aid and CDC, 2011.                                                                                                                                                      |
| Malawi                 | 2010      | 0-59.99   | National             | 4527        | HAZ, WAZ, WHZ | 1      | DHS                                                                                                                                                                                                                                                                                 |
| Malaysia               | 1999      | 0-59.99   | National             | 5108        | HAZ, WAZ, WHZ | 3,5    | Somsiah Parman. A study of malnutrition in under five children in Malaysia. Kuala Lumpur, Malaysia: Ministry of Health, 2000 (and additional analysis).                                                                                                                             |
| Malaysia               | 2006      | 0-59.99   | National             | 5546        | HAZ, WAZ      | 2      | Khor GL, Noor Safiza MN, Jamalludin AB, Jamaiah H, Geeta A, Kee CC et al. Nutritional status of children below five years in Malaysia: Anthropometric analyses from the third national health and morbidity survey III (NHMS, 2006). Malaysian Journal of Nutrition 2009;15:121-36. |
| Maldives               | 1994      | 0-59.99   | National             | 1995        | HAZ, WAZ, WHZ | 2      | Ministry of Health and Welfare. Nutritional status and child feeding practices of Maldivian children. Department of Public Health. Male, Maldives, 1994.                                                                                                                            |
| Maldives               | 1995      | 0-59.99   | National             | 798         | HAZ, WAZ, WHZ | 3,5    | Maldives multiple indicator survey report (MICS). United Nations Children's Fund. Malé, Maldives, June 1996 (and additional analysis).                                                                                                                                              |

| Country                     | Year      | Age range | Administrative level | Sample size | Indicators    | Notes* | Survey (when individual level data available) or source (when summary statistics available)                                                                                                                                                                       |
|-----------------------------|-----------|-----------|----------------------|-------------|---------------|--------|-------------------------------------------------------------------------------------------------------------------------------------------------------------------------------------------------------------------------------------------------------------------|
| Maldives                    | 1997-1998 | 12-59.99  | National             | 1486        | HAZ, WAZ, WHZ | 2      | Ministry of Planning and National Development and United Nations Development Programme. Vulnerability and poverty assessment 1998. Male', Republic of Maldives, 1999 (and additional analysis).                                                                   |
| Maldives                    | 2001      | 0-59.99   | National             | 746         | HAZ, WAZ, WHZ | 2      | Damodar Sahu. Multiple indicator cluster survey (MICS 2) Maldives (draft). Ministry of Health. Male, Republic of Maldives, 2001 (and additional analysis).                                                                                                        |
| Mali                        | 1987      | 3-35.99   | National             | 1521        | HAZ, WAZ, WHZ | 1      | DHS                                                                                                                                                                                                                                                               |
| Mali                        | 1995-1996 | 0-35.99   | National             | 4634        | HAZ, WAZ, WHZ | 1      | DHS                                                                                                                                                                                                                                                               |
| Mali                        | 1996      | 6-59.99   | National             | NR          | HAZ, WAZ, WHZ | 3,5,7  | Enquête à indicateurs multiples au Mali (EIM) 1996 (MICS). Rapport d'Analyse. Direction Nationale de la Statistique et de l'Informatique (DNSI). Bamako, Mali, 1996 (and additional analysis).                                                                    |
| Mali                        | 2001      | 0-59.99   | National             | 9291        | HAZ, WAZ, WHZ | 1      | DHS                                                                                                                                                                                                                                                               |
| Mali                        | 2006      | 0-59.99   | National             | 10746       | HAZ, WAZ, WHZ | 1      | DHS                                                                                                                                                                                                                                                               |
| Mauritania                  | 1988      | 0-59.99   | National             | 931         | HAZ, WHZ      | 3,5    | Elder JA. The socio-economic determinants of nutritional status among children under five in Mauritania. Social Dimensions of Adjustment Surveys. Washington D.C.: The World Bank, 1990 (and additional analysis).                                                |
| Mauritania                  | 1990      | 0-59.99   | National             | 3613        | HAZ, WAZ, WHZ | 1      | PAPCHILD Mauritania                                                                                                                                                                                                                                               |
| Mauritania                  | 1995-1996 | 0-59.99   | National             | 3733        | HAZ, WAZ, WHZ | 3,5    | Ministère du Plan, Direction des Ressources Humaines. Enquête nationale sur les indicateurs des objectifs à mi-terme en Mauritanie (MICS). Nouakchott, République Islamique de Mauritanie, 1996 (and additional analysis).                                        |
| Mauritania                  | 2000-2001 | 0-59.99   | National             | 4297        | HAZ, WAZ, WHZ | 2      | Office National de la Statistique (ONS) [Mauritania] et ORC Macro. Enquête démographique et de santé Mauritanie 2000-2001. Demographic and Health Surveys. Calverton, Maryland, USA: ONS et ORC Macro, 2001 (and additional analysis).                            |
| Mauritania                  | 2007      | 0-59.99   | National             | 7891        | HAZ, WAZ, WHZ | 1      | MICS                                                                                                                                                                                                                                                              |
| Mauritania                  | 2008      | 0-59.99   | National             | 6338        | HAZ, WAZ, WHZ | 2      | ANED, Office National de la Statistique (ONS) et UNICEF. Enquête rapide nationale sur la nutrition et survie de l'enfant en Mauritanie: Rapport final. Nouakchott, Mauritanie: ANED, ONS et UNICEF, 2008 (and additional analysis).                               |
| Mauritius                   | 1985      | 0-59.99   | National             | 2430        | HAZ, WAZ, WHZ | 3,5    | Ministry of Health. Mauritius national nutrition survey 1985: summary report. Evaluation and Nutrition Unit. Port Louis, Mauritius, 1988 (and additional analysis).                                                                                               |
| Mauritius                   | 1995      | 0-59.99   | National             | 1537        | HAZ, WAZ, WHZ | 3,5    | Ministry of Health. A survey on nutrition in Mauritius and Rodrigues, 1995 (final report). Port Louis, Mauritius, 1996 (and additional analysis).                                                                                                                 |
| Mexico                      | 1988      | 0-59.99   | National             | 7422        | HAZ, WAZ, WHZ | 3,5    | Sepulveda AJ, Lezana MA, Tapia Conyer R, Valdespino IL, Madrigal H, Kumate J. Estado nutricional de preescolares y las mujeres en Mexico: resultados de una encuesta probabilística nacional. Gaceta Medica de Mexico 1990;126:207-226 (and additional analysis). |
| Mexico                      | 1991      | 12-59.99  | First admin level    | 935         | WAZ           | 3,5    | Hernandez Martinez E, Roldan Fernandez SG. [Prevalence of malnutrition in preschool children in Tabasco, Mexico.] Salud Publica de Mexico 1995;37:211-218.                                                                                                        |
| Mexico                      | 1999      | 0-59.99   | National             | 7618        | HAZ, WAZ, WHZ | 1      | Nutrition 1999                                                                                                                                                                                                                                                    |
| Mexico                      | 2005-2006 | 1-59.99   | National             | 7953        | HAZ, WAZ, WHZ | 1      | ENSANUT 2005-2006                                                                                                                                                                                                                                                 |
| Micronesia (Fed. States of) | 2000      | 24-59.99  | Regional             | 485         | HAZ, WHZ      | 3,5    | Vitamin A deficiency among children--Federated States of Micronesia, 2000. Morbidity and Mortality Weekly Report 2001;50(24):509-12.                                                                                                                              |

| Country    | Year      | Age range | Administrative level | Sample size | Indicators    | Notes* | Survey (when individual level data available) or source (when summary statistics available)                                                                                                                             |
|------------|-----------|-----------|----------------------|-------------|---------------|--------|-------------------------------------------------------------------------------------------------------------------------------------------------------------------------------------------------------------------------|
| Mongolia   | 1992      | 0-47.99   | National             | 1679        | HAZ, WAZ, WHZ | 3,5    | Kachondham Y. Report of a consultancy on the Mongolian Child Nutrition Survey. Institute of Nutrition. Nakornpathom, Thailand, 1992 (and additional analysis).                                                          |
| Mongolia   | 1997      | 0-59.99   | Regional             | 439         | HAZ, WAZ, WHZ | 2      | Nutrition Research Centre. Mongolia nutrition research centre survey 1997. Ulaanbaatar, Mongolia, 1999 (and additional analysis).                                                                                       |
| Mongolia   | 1999      | 0-59.99   | National             | 4146        | HAZ, WAZ, WHZ | 2      | Kachondham Y. Report on the 2nd national child and nutrition survey, Mongolia 1999. Institute of Nutrition and Faculty of Medicine, Ramathibodi Hospital, Mahidol University, Thailand, 2000 (and additional analysis). |
| Mongolia   | 2000      | 0-59.99   | National             | 5811        | HAZ, WAZ, WHZ | 1      | MICS                                                                                                                                                                                                                    |
| Mongolia   | 2004      | 6-59.99   | National             | 1247        | HAZ, WAZ, WHZ | 2      | Nutrition Research Center, Ministry of Health (Mongolia) and Unicef -Mongolia. Nutritional status of Mongolian children and women: 3rd National nutrition survey report. Ulaanbaatar, Mongolia, 2006.                   |
| Mongolia   | 2005      | 0-59.99   | National             | 3275        | HAZ, WAZ, WHZ | 1      | MICS                                                                                                                                                                                                                    |
| Mongolia   | 2010      | 0-59.99   | National             | 3956        | HAZ, WAZ, WHZ | 3      | Multiple Indicator Cluster Survey 2010. Summary Report. Unlaanbaatar, 2011.                                                                                                                                             |
| Morocco    | 1987      | 0-59.99   | National             | 5289        | HAZ, WAZ, WHZ | 1      | DHS                                                                                                                                                                                                                     |
| Morocco    | 1992      | 0-59.99   | National             | 4512        | HAZ, WAZ, WHZ | 1      | DHS                                                                                                                                                                                                                     |
| Morocco    | 1997      | 0-59.99   | National             | 3587        | HAZ, WAZ, WHZ | 1      | PAPCHILD Morocco                                                                                                                                                                                                        |
| Morocco    | 2003-2004 | 0-59.99   | National             | 5315        | HAZ, WAZ, WHZ | 1      | DHS                                                                                                                                                                                                                     |
| Mozambique | 1995      | 0-59.99   | National             | 4586        | HAZ, WAZ, WHZ | 3,5    | Government of Mozambique and United Nations Children's Fund. Multiple indicator cluster survey Mozambique - 1995. MICS Surveys. Ministry of Planning and Finance. Maputo, Mozambique, 1996 (and additional analysis).   |
| Mozambique | 1997      | 0-35.99   | National             | 3357        | HAZ, WAZ, WHZ | 1      | DHS                                                                                                                                                                                                                     |
| Mozambique | 2000-2001 | 0-59.99   | National             | NR          | HAZ, WAZ, WHZ | 3,5,7  | Questionario de indicadores basicos de bem-estar (QUIBB): Relatorio final. Maputo, Moçambique: Instituto Nacional de Estadisticas, 2001 (and additional analysis).                                                      |
| Mozambique | 2002      | 6-59.99   | Regional             | 4832        | HAZ, WHZ      | 3,5    | Mozambique Comite de Analise de Vulnerabilidade (VAC). Emergency vulnerability report: November-December 2002 (final report). Maputo, Mozambique: VAC, 2003.                                                            |
| Mozambique | 2003-2004 | 0-59.99   | National             | 7980        | HAZ, WAZ, WHZ | 1      | DHS                                                                                                                                                                                                                     |
| Mozambique | 2008      | 0-59.99   | National             | 10595       | HAZ, WAZ, WHZ | 1      | MICS                                                                                                                                                                                                                    |
| Myanmar    | 1990      | 0-35.99   | National             | 5899        | WAZ           | 3,5    | Ministry of Health. Nutrition Situation of Myanmar Children. Preliminary report of the national nutrition survey 1990. Rangoon, Myanmar, 1991 (and additional analysis).                                                |
| Myanmar    | 1991      | 0-35.99   | National             | 5540        | HAZ, WAZ, WHZ | 3,5    | Ministry of Health. Nutrition situation of Myanmar children. Report of the National Nutrition Survey 1991. Ragoon, Myanmar, 1994 (and additional analysis).                                                             |
| Myanmar    | 1994      | 0-35.99   | National             | 5994        | HAZ, WAZ, WHZ | 3,5    | Department of Health. National nutrition survey, 1994. National Nutrition Centre. Yangon, Myanmar, 1995 (and additional analysis).                                                                                      |
| Myanmar    | 1995      | 0-59.99   | National             | 19908       | WAZ           | 3,5    | Ministry of Health. Monitoring progress toward the goals of the World Summit for Children through multiple indicator cluster survey (MICS). Yangon, Myanmar, 1995 (and additional analysis).                            |
| Myanmar    | 1997      | 0-35.99   | National             | 4894        | HAZ, WAZ, WHZ | 3,5    | Ministry of Health. National nutrition survey 1997. National Nutrition Centre. Yangon, Myanmar, 2000 (and additional analysis).                                                                                         |
| Myanmar    | 2000      | 0-59.99   | National             | 8140        | HAZ, WAZ, WHZ | 1      | MICS                                                                                                                                                                                                                    |
| Myanmar    | 2003      | 0-59.99   | National             | 8449        | HAZ, WAZ, WHZ | 2      | Department of Health Planning, Ministry of Health and UNICEF (Myanmar). Multiple indicator cluster survey 2003 (MICS). Yangon, Myanmar, 2004 (and additional analysis).                                                 |

| Country   | Year      | Age range | Administrative level | Sample size | Indicators    | Notes* | Survey (when individual level data available) or source (when summary statistics available)                                                                                                                                                     |
|-----------|-----------|-----------|----------------------|-------------|---------------|--------|-------------------------------------------------------------------------------------------------------------------------------------------------------------------------------------------------------------------------------------------------|
| Namibia   | 1992      | 0-59.99   | National             | 2534        | HAZ, WAZ, WHZ | 1      | DHS                                                                                                                                                                                                                                             |
| Namibia   | 2000      | 0-59.99   | National             | 2913        | HAZ, WAZ, WHZ | 1      | DHS                                                                                                                                                                                                                                             |
| Namibia   | 2006-2007 | 0-59.99   | National             | 3668        | HAZ, WAZ, WHZ | 1      | DHS                                                                                                                                                                                                                                             |
| Nepal     | 1995      | 6-35.99   | National             | 6781        | HAZ, WAZ, WHZ | 3,5    | National Planning Commission. Nepal multiple indicator surveillance: cycle I, Jan to March 1995 health and nutrition - final report (MICS). Kathmandu, Nepal, 1996 (and additional analysis).                                                   |
| Nepal     | 1996      | 0-35.99   | National             | 3700        | HAZ, WAZ, WHZ | 1      | DHS                                                                                                                                                                                                                                             |
| Nepal     | 1996      | 6-35.99   | National             | 5525        | HAZ, WAZ, WHZ | 2,5    | National Planning Commission. Early childhood feeding nutrition and development. Nepal multiple indicator surveillance - fourth cycle (MICS). His Majesty's Government, Kathmandu, Nepal, 1997 (and additional analysis).                       |
| Nepal     | 1997-1998 | 6-59.99   | National             | 17471       | HAZ, WAZ, WHZ | 2      | Nepal micronutrient status survey 1998. Kathmandu, Nepal: Ministry of Health, Child Health Division, HMG/N, New ERA, Micronutrient Initiative, UNICEF Nepal and WHO, 2000 (and additional analysis).                                            |
| Nepal     | 2001      | 0-59.99   | National             | 6143        | HAZ, WAZ, WHZ | 1      | DHS                                                                                                                                                                                                                                             |
| Nepal     | 2006      | 0-59.99   | National             | 5206        | HAZ, WAZ, WHZ | 1      | DHS                                                                                                                                                                                                                                             |
| Nepal     | 2011      | 0-59.99   | National             | 2324        | HAZ, WAZ, WHZ | 1      | DHS                                                                                                                                                                                                                                             |
| Nicaragua | 1988      | 0-59.99   | First admin level    | 2822        | HAZ, WAZ, WHZ | 3,5    | Ministerio de Salud, Centro de Investigacion y Estudios de la Salud. Enfoque de riesgo y estado nutricional de los niños menores de 5 años en la region III, 1988. Managua, Nicaragua; 1988.                                                    |
| Nicaragua | 1993      | 0-59.99   | National             | 3347        | HAZ, WAZ, WHZ | 2      | Nicaragua 1993 living standards measurement survey (LSMS). Washington, D.C.: The World Bank, 1997 (and additional analysis).                                                                                                                    |
| Nicaragua | 1997-1998 | 0-59.99   | National             | 6793        | HAZ, WAZ, WHZ | 1      | DHS                                                                                                                                                                                                                                             |
| Nicaragua | 1998      | 0-59.99   | National             | 2787        | HAZ, WAZ, WHZ | 2      | Instituto Nacional de Estadísticas y Censos [Nicaragua] and the World Bank. Encuesta nacional de hogares sobre medicion de niveles de vida, 1998 (2nd Living Standard Measurements Survey). Managua, Nicaragua, 1999 (and additional analysis). |
| Nicaragua | 2001      | 0-59.99   | National             | 5839        | HAZ, WAZ, WHZ | 1      | DHS                                                                                                                                                                                                                                             |
| Nicaragua | 2003-2005 | 6-59.99   | National             | 1494        | HAZ, WAZ, WHZ | 2      | Ministra de Salud, MINSAL y CDC. Sistema integrado de vigilancia de intervenciones nutricionales (SIVIN): Informe de progreso, Nicaragua 2003-05. Managua, Nicaragua 2008 (and additional analysis).                                            |
| Nicaragua | 2006-2007 | 0-59.99   | National             | 6538        | HAZ, WAZ, WHZ | 1      | RHS Nicaragua 2006-2007                                                                                                                                                                                                                         |
| Niger     | 1985      | 0-59.99   | National             | 1672        | HAZ, WAZ, WHZ | 3,5    | Ministère de la Santé Publique et des Affaires Sociales. Enquête nationale sur la morbidité et la mortalité, rapport No 1. Cellule de Planification. Niamey, République de Niger, 1985 (and additional analysis).                               |
| Niger     | 1985      | 0-59.99   | Regional             | 3372        | WHZ           | 3,5    | Fay H. Report for the Société de la Croix-Rouge. Evaluation de la prévalence de la malnutrition dans les départements de Maradi, Tahoua et Zinder fin novembre début décembre 1985. Croix-Rouge Nigérienne, 1986.                               |
| Niger     | 1987      | 0-59.99   | Regional             | 3115        | HAZ, WHZ      | 3,5    | Quelin G, Pecoul B, Amadou B, Baker S. [Facteurs de risque de la malnutrition chez les enfants de 0-59 mois dans deux arrondissements au Niger.] <i>Medicine Tropicale</i> 1991;51:335-342.                                                     |
| Niger     | 1992      | 0-59.99   | National             | 4643        | HAZ, WAZ, WHZ | 1      | DHS                                                                                                                                                                                                                                             |
| Niger     | 1998      | 0-35.99   | National             | 3870        | HAZ, WAZ, WHZ | 1      | DHS                                                                                                                                                                                                                                             |
| Niger     | 2000      | 0-59.99   | National             | 4768        | HAZ, WAZ, WHZ | 1      | MICS                                                                                                                                                                                                                                            |
| Niger     | 2006      | 0-59.99   | National             | 3671        | HAZ, WAZ, WHZ | 1      | DHS                                                                                                                                                                                                                                             |

| Country                        | Year      | Age range | Administrative level | Sample size | Indicators    | Notes* | Survey (when individual level data available) or source (when summary statistics available)                                                                                                                                                          |
|--------------------------------|-----------|-----------|----------------------|-------------|---------------|--------|------------------------------------------------------------------------------------------------------------------------------------------------------------------------------------------------------------------------------------------------------|
| Nigeria                        | 1986      | 6-35.99   | First admin level    | 1464        | HAZ, WAZ, WHZ | 2,5    | Ministry of Health. Ondo State, Nigeria, demographic and health survey 1986. Demographic and Health Surveys. Medical/Preventive Health Division, Akure, Ondo State, Nigeria, 1989 (and additional analysis).                                         |
| Nigeria                        | 1990      | 0-59.99   | National             | 5750        | HAZ, WAZ, WHZ | 1      | DHS                                                                                                                                                                                                                                                  |
| Nigeria                        | 1999      | 0-59.99   | National             | 8617        | HAZ, WAZ, WHZ | 3,5    | Federal Office of Statistics [Nigeria] and UNICEF. Multiple indicator cluster survey (1999) Nigeria (MICS). Lagos: Federal Office of Statistics and UNICEF, December 14, 2000.                                                                       |
| Nigeria                        | 2001      | 0-59.99   | National             | 4954        | HAZ, WAZ, WHZ | 3,5    | Maziya-Dixon B, Akinyele IO, Oguntona EB, Nokoe S, Sanusi RA, Harris E. Nigeria food consumption survey 2001-2003: Summary. Ibadan, Nigeria: International Institute of Tropical Agriculture, 2004.                                                  |
| Nigeria                        | 2003      | 0-59.99   | National             | 4349        | HAZ, WAZ, WHZ | 1      | DHS                                                                                                                                                                                                                                                  |
| Nigeria                        | 2007      | 0-59.99   | National             | 14423       | HAZ, WAZ, WHZ | 1      | MICS                                                                                                                                                                                                                                                 |
| Nigeria                        | 2008      | 0-59.99   | National             | 18712       | HAZ, WAZ, WHZ | 1      | DHS                                                                                                                                                                                                                                                  |
| Occupied Palestinian Territory | 1995      | 0-59.99   | First admin level    | 1500        | HAZ, WAZ, WHZ | 3,5    | Kumar B. Assessment of the nutritional status of children under 5 in the Gaza strip. Bethlehem: Terre des Hommes Palestine, 1995.                                                                                                                    |
| Occupied Palestinian Territory | 1996      | 0-59.99   | National             | 4451        | HAZ, WAZ, WHZ | 3,5    | The health survey in the West Bank and Gaza Strip: main findings (MICS). Palestinian Central Bureau of Statistics. Ramallah, Palestine, 1996 (and additional analysis).                                                                              |
| Occupied Palestinian Territory | 2006-2007 | 0-59.99   | National             | 9365        | HAZ, WAZ, WHZ | 2      | Palestinian Central Bureau of Statistics. Palestinian family health survey, 2006: Final report. Ramallah, Palestine, 2007 (additional analysis conducted by PAPFAM).                                                                                 |
| Oman                           | 1991      | 12-59.99  | National             | 764         | HAZ, WAZ, WHZ | 3,5    | Musaiger OA. Ministry of Health. National Nutrition Survey of the Sultanate of Oman. UNICEF Muscat, Oman, 1993 (and additional analysis).                                                                                                            |
| Oman                           | 1994-1995 | 0-47.99   | National             | 639         | HAZ, WAZ, WHZ | 2      | Ministry of Health. National study on the prevalence of vitamin A deficiency (VAD) among children 6 months to 7 years. Muscat, Sultanate of Oman, 1995 (and additional analysis).                                                                    |
| Oman                           | 1999      | 0-59.99   | National             | 14076       | HAZ, WAZ, WHZ | 2      | Alasfoor D, Mohammed AJ. Implications of the use of the new WHO growth charts on the interpretation of malnutrition and obesity in infants and young children in Oman. Eastern Mediterranean Health Journal 2009;15:890-8 (and additional analysis). |
| Oman                           | 2009      | 0-59.99   | National             | 8105        | HAZ, WAZ, WHZ | 2      | Alasfoor D, Al Sayed M, AlShamakhi S, Al Ghammari I. Second national PEM survey 2009. Ministry of Health. Muscat, Oman, 2011.                                                                                                                        |
| Pakistan                       | 1985-1987 | 6-59.99   | National             | 6707        | HAZ, WAZ, WHZ | 3,5    | Government of Pakistan. National nutrition survey 1985-87 report. National Institute of Health, Nutrition Division. Islamabad, Pakistan, 1988 (and additional analysis).                                                                             |
| Pakistan                       | 1990-1991 | 0-59.99   | National             | 4152        | HAZ, WAZ, WHZ | 1      | DHS                                                                                                                                                                                                                                                  |
| Pakistan                       | 1990-1994 | 0-59.99   | National             | 3240        | HAZ, WAZ, WHZ | 2      | Nuruddin R and Azam I. National health survey of Pakistan (NHSP, 1990-94): Health profile of the people of Pakistan. Islamabad, Pakistan, 1998 (and additional analysis).                                                                            |
| Pakistan                       | 1995      | 0-59.99   | National             | 7368        | WAZ           | 3,5    | Ministry of Health. Multiple indicator cluster survey of Pakistan, 1995. MICS surveys. Government of Pakistan. Islamabad, Pakistan, 1996 (and additional analysis).                                                                                  |
| Pakistan                       | 1998      | 6-35.99   | First admin level    | 4932        | HAZ, WAZ, WHZ | 3,5    | CIETinternational, Sindh Bureau of Statistics, Government of Sindh, UNICEF Sindh. The bond of care: Technical Report, Sindh Province 1998. Karachi, Sindh Province: CIETinternational, 1999.                                                         |
| Pakistan                       | 2001      | 6-59.99   | National             | 9174        | HAZ, WAZ, WHZ | 1      | Pakistan National Nutrition Survey 2001                                                                                                                                                                                                              |
| Pakistan                       | 2011      | 0-59.99   | National             | 28087       | HAZ, WAZ, WHZ | 1      | Pakistan Nutritional Survey 2011                                                                                                                                                                                                                     |

| Country          | Year      | Age range | Administrative level | Sample size | Indicators    | Notes* | Survey (when individual level data available) or source (when summary statistics available)                                                                                                                                                                                                              |
|------------------|-----------|-----------|----------------------|-------------|---------------|--------|----------------------------------------------------------------------------------------------------------------------------------------------------------------------------------------------------------------------------------------------------------------------------------------------------------|
| Panama           | 1992      | 12-59.99  | National             | 1389        | HAZ, WAZ, WHZ | 3,5    | Ministerio de Salud. Encuesta nacional de Vitamina A, 1992. Departamento de Nutricion y Dietetica. Panama, Republica de Panama, 1992.                                                                                                                                                                    |
| Panama           | 1997      | 0-59.99   | National             | 2289        | HAZ, WAZ, WHZ | 2      | Ministerio de Planificacion y Politica Economica. Encuesta de niveles de vida. 1997 Panama living standards survey (LSMS). Ciudad de Panama, Republica de Panama, 1998 (and additional analysis).                                                                                                        |
| Papua New Guinea | 2005      | 6-59.99   | National             | 924         | HAZ, WAZ, WHZ | 2      | Department of Health of Papua New Guinea, UNICEF Papua New Guinea, University of Papua New Guinea, US Centers of Disease Control and Prevention. Papua New Guinea national micronutrient survey 2005: Final report. Port Moresby, Papua New Guinea, 2009 (and additional analysis).                      |
| Paraguay         | 1990      | 0-59.99   | National             | 3605        | HAZ, WAZ, WHZ | 1      | DHS                                                                                                                                                                                                                                                                                                      |
| Paraguay         | 2005      | 0-59.99   | National             | 1700        | HAZ, WAZ, WHZ | 2      | Sanabria MC. Informe final de consultoria: Analisis de la situacion de salud infantil y antropometria en menores de 5 años. Paraguay EPH 2005. Asuncion, Paraguay: PNUD Paraguay, 2006.                                                                                                                  |
| Peru             | 1991-1992 | 0-59.99   | National             | 7653        | HAZ, WAZ, WHZ | 1      | DHS                                                                                                                                                                                                                                                                                                      |
| Peru             | 1994      | 0-59.99   | National             | 2070        | HAZ, WAZ, WHZ | 1      | ENNIV 1994                                                                                                                                                                                                                                                                                               |
| Peru             | 1996      | 0-59.99   | National             | 14781       | HAZ, WAZ, WHZ | 1      | DHS                                                                                                                                                                                                                                                                                                      |
| Peru             | 2000      | 0-59.99   | National             | 1835        | HAZ, WAZ, WHZ | 1      | ENNIV 2000                                                                                                                                                                                                                                                                                               |
| Peru             | 2000      | 0-59.99   | National             | 11515       | HAZ, WAZ, WHZ | 1      | DHS                                                                                                                                                                                                                                                                                                      |
| Peru             | 2003-2005 | 0-59.99   | National             | 2290        | HAZ, WAZ, WHZ | 1      | DHS                                                                                                                                                                                                                                                                                                      |
| Peru             | 2006-2008 | 0-59.99   | National             | 8075        | HAZ, WAZ, WHZ | 1      | DHS                                                                                                                                                                                                                                                                                                      |
| Peru             | 2009      | 0-59.99   | National             | 9183        | HAZ, WAZ, WHZ | 3      | Instituto Nacional de Estadística e Informática (INEI), Agencia de los Estados Unidos Para el Desarrollo Internacional (USAID) y ORC Macro. Encuesta demografica y de salud familiar. Informe principal: ENDES continua 2009. Demographic and Health Surveys. Lima, Peru: INEI, USAID y ORC Macro, 2009. |
| Peru             | 2010      | 0-59.99   | National             | 8668        | HAZ, WAZ, WHZ | 3      | Instituto Nacional de Estadística e Informática (INEI), Agencia de los Estados Unidos Para el Desarrollo Internacional (USAID) y ORC Macro. Encuesta demografica y de salud familiar. Informe principal: ENDES continua 2010. Demographic and Health Surveys. Lima, Peru: INEI, USAID y ORC Macro, 2009. |
| Philippines      | 1987      | 0-59.99   | National             | 2250        | HAZ, WAZ, WHZ | 3,5    | Departement of Science and Technology. Third National Nutrition Survey Philippines, 1987. Food and Nutrition Research Institute. Manila, Philippines; 1991 (and additional analysis).                                                                                                                    |
| Philippines      | 1989-1990 | 0-59.99   | National             | 5629        | HAZ, WAZ, WHZ | 3,5    | National Economics and Statistics Section. Regional Updating of Nutritional Status of Filipino Children, 1989-90. Food and Nutrition Research Institute. Manila, Philippines; 1991 (and additional analysis).                                                                                            |
| Philippines      | 1992      | 0-59.99   | National             | 5858        | HAZ, WAZ, WHZ | 3,5    | Department of Science and Technology. The 1992 regional nutrition survey. Food and Nutrition Research Institute. Manila, Philippines; 1994 (and additional analysis).                                                                                                                                    |
| Philippines      | 1993      | 0-59.99   | National             | 4229        | HAZ, WAZ, WHZ | 3,5    | Department of Science and Technology. The fourth national nutrition survey: Philippines 1993. Food and Nutrition Institute. Manila, Philippines; 1995 (and additional analysis).                                                                                                                         |
| Philippines      | 1998      | 0-59.99   | National             | 24308       | HAZ, WAZ, WHZ | 3,5    | Food and Nutrition Research Institute. The 5th national nutrition survey. Philippine nutrition: Facts & figures. Taguig, Metro Manila, Philippines: UNICEF, 2001 (and additional analysis).                                                                                                              |
| Philippines      | 2003      | 0-59.99   | National             | 3499        | HAZ, WAZ, WHZ | 2      | Sixth National Nutrition Survey: Philippines, 2003. Food and Nutrition Research Institute, 2004.                                                                                                                                                                                                         |

| Country         | Year      | Age range | Administrative level | Sample size | Indicators    | Notes* | Survey (when individual level data available) or source (when summary statistics available)                                                                                                                                                                                                        |
|-----------------|-----------|-----------|----------------------|-------------|---------------|--------|----------------------------------------------------------------------------------------------------------------------------------------------------------------------------------------------------------------------------------------------------------------------------------------------------|
| Philippines     | 2008      | 0-59.99   | National             | 18403       | HAZ, WAZ, WHZ | 3      | Food and Nutrition Research Institute, Department of Science and Technology (FNRI-DOST). 7th national nutrition survey. Manila, Philippines: FNRI-DOST, 2010 (and additional analysis).                                                                                                            |
| Rwanda          | 1992      | 0-59.99   | National             | 4280        | HAZ, WAZ, WHZ | 1      | DHS                                                                                                                                                                                                                                                                                                |
| Rwanda          | 2000      | 0-59.99   | National             | 2700        | HAZ, WAZ, WHZ | 1      | MICS                                                                                                                                                                                                                                                                                               |
| Rwanda          | 2000      | 0-59.99   | National             | 6014        | HAZ, WAZ, WHZ | 1      | DHS                                                                                                                                                                                                                                                                                                |
| Rwanda          | 2005      | 0-59.99   | National             | 3614        | HAZ, WAZ, WHZ | 1      | DHS                                                                                                                                                                                                                                                                                                |
| Rwanda          | 2010      | 0-59.99   | National             | 4050        | HAZ, WAZ, WHZ | 1      | DHS                                                                                                                                                                                                                                                                                                |
| Samoa           | 1999      | 0-59.99   | National             | 1107        | HAZ, WAZ, WHZ | 3,5    | Mackerras D, Kiernan DM. Samoa national nutrition survey 1999. Part 3: Child growth, diet, contact with the health system and interview with carers. Technical report. Apia, Samoa: Nutrition Centre, 2003 (and additional analysis).                                                              |
| Saudi Arabia    | 1994      | 0-59.99   | National             | 23821       | HAZ, WAZ, WHZ | 3,5    | Al-Mazrou YY, Al-Amoud MM, El-Gizouli SE, Khoja T, Al-Turki K, Tantawi N, Khalil MK, Aziz KM. Comparison of the growth standards between Saudi and American children aged 0-5 years. Saudi Medical Journal 2003;24:598-602 [Erratum Saudi Medical Journal 2003;24:1032] (and additional analysis). |
| Saudi Arabia    | 2004-2005 | 0-59.99   | National             | 15601       | HAZ, WAZ, WHZ | 2      | El-Mouzan MI, Al-Herbish AS, Al-Salloum AA, Qurachi MM, Al-Omar AA. Growth charts for Saudi children and adolescents. Saudi Medical Journal 2007;28:1555-68 (and additional analysis).                                                                                                             |
| Senegal         | 1986      | 6-35.99   | National             | 637         | HAZ, WAZ, WHZ | 1      | DHS                                                                                                                                                                                                                                                                                                |
| Senegal         | 1991-1992 | 0-35.99   | National             | NR          | HAZ, WAZ, WHZ | 3,5,7  | Senegal Bureau of Statistics. Social Dimensions of Adjustment Household Priority Survey 1991-92. New York: The World Bank, 1993 (and additional analysis).                                                                                                                                         |
| Senegal         | 1992-1993 | 0-59.99   | National             | 4401        | HAZ, WAZ, WHZ | 1      | DHS                                                                                                                                                                                                                                                                                                |
| Senegal         | 1996      | 0-59.99   | National             | NR          | HAZ, WAZ, WHZ | 3,5,7  | Evaluation des objectifs intermédiaires (MICS). Dakar: UNICEF, September 1996 (and additional analysis).                                                                                                                                                                                           |
| Senegal         | 2000      | 0-59.99   | National             | 8434        | HAZ, WAZ, WHZ | 1      | MICS                                                                                                                                                                                                                                                                                               |
| Senegal         | 2005      | 0-59.99   | National             | 2860        | HAZ, WAZ, WHZ | 1      | DHS                                                                                                                                                                                                                                                                                                |
| Senegal         | 2010-2011 | 0-59.99   | National             | 3762        | HAZ, WAZ, WHZ | 3      | Agence Nationale de la statistique et de la démographie, Measure DHS. Senegal Enquete Démographique et de Santé a Indicateurs Multiples 2010-2011: Rapport Préliminaire. Dakar, Senegal and Calverton, Maryland, USA: Agence Nationale de la statistique et de la démographie, ICF Macro, 2011.    |
| Seychelles      | 1987-1988 | 0-59.99   | National             | 836         | HAZ, WAZ, WHZ | 3,5    | Ministry of Health. Nutritional status of Seychellois children (unpublished data). Victoria, Seychelles, 1989 (and additional analysis).                                                                                                                                                           |
| Sierra Leone    | 1989      | 0-59.99   | National             | 4424        | HAZ, WAZ, WHZ | 3,5    | Ministry of Health. The Republic of Sierra Leone National Nutrition Survey. Freetown, Sierra Leone; 1990.                                                                                                                                                                                          |
| Sierra Leone    | 1990      | 0-59.99   | National             | 4595        | HAZ, WAZ, WHZ | 3,5    | Ministry of Health. The Republic of Sierra Leone National Nutrition Survey. Freetown, Sierra Leone; 1990.                                                                                                                                                                                          |
| Sierra Leone    | 2000      | 0-59.99   | National             | 2224        | HAZ, WAZ, WHZ | 1      | MICS                                                                                                                                                                                                                                                                                               |
| Sierra Leone    | 2005      | 0-59.99   | National             | 5103        | HAZ, WAZ, WHZ | 2      | Statistics Sierra Leone and UNICEF-Sierra Leone. Sierra Leone multiple indicator cluster survey 2005: Final Report. Freetown, Sierra Leone: Statistics Sierra Leone and UNICEF-Sierra Leone, 2007 (and additional analysis).                                                                       |
| Sierra Leone    | 2008      | 0-59.99   | National             | 1995        | HAZ, WAZ, WHZ | 1      | DHS                                                                                                                                                                                                                                                                                                |
| Solomon Islands | 1989      | 0-59.99   | National             | 3980        | HAZ, WAZ, WHZ | 2      | Solomon Islands national nutrition survey 1989. Honiara, Solomon Islands, 1990 (and additional analysis).                                                                                                                                                                                          |

| Country         | Year      | Age range | Administrative level | Sample size | Indicators    | Notes* | Survey (when individual level data available) or source (when summary statistics available)                                                                                                                                                                                                                                                                                                                                                |
|-----------------|-----------|-----------|----------------------|-------------|---------------|--------|--------------------------------------------------------------------------------------------------------------------------------------------------------------------------------------------------------------------------------------------------------------------------------------------------------------------------------------------------------------------------------------------------------------------------------------------|
| Solomon Islands | 2006-2007 | 0-59.99   | National             | 2029        | HAZ, WAZ, WHZ | 3      | National Statistics Office (SISO), SPC and Macro International Inc. Solomon Islands 2006-2007 demographic and health survey. DHS. Noumea, New Caledonia: SISO, SPC and Macro International Inc., 2007 (accessed 22/12/09 <a href="http://www.spc.int/prism/Country/SB/Stats/Publication/DHS07/report/SI-DHS-REPORT_TOC_Summary.pdf">http://www.spc.int/prism/Country/SB/Stats/Publication/DHS07/report/SI-DHS-REPORT_TOC_Summary.pdf</a> ) |
| Somalia         | 1996      | 0-59.99   | Regional             | 937         | WHZ           | 3,5    | Somalia multiple indicator cluster survey: north west zone (Somaliland) (MICS). Mogadishu: UNICEF, August 1996.                                                                                                                                                                                                                                                                                                                            |
| Somalia         | 2000      | 0-59.99   | National             | 3582        | HAZ, WAZ, WHZ | 3,5    | UNICEF Somalia. Somalia end-decade multiple indicator cluster survey. Full technical report. Nairobi: UNICEF Somalia, 2001 (and additional analysis).                                                                                                                                                                                                                                                                                      |
| Somalia         | 2006      | 0-59.99   | National             | 5513        | HAZ, WAZ, WHZ | 1      | MICS                                                                                                                                                                                                                                                                                                                                                                                                                                       |
| South Africa    | 1993-1994 | 6-59.99   | National             | 3689        | HAZ           | 2,5    | South Africans rich and poor: baseline household statistics. Project for statistics on living standards and development. Cape Town, 1994 (and additional analysis).                                                                                                                                                                                                                                                                        |
| South Africa    | 1994-1995 | 6-59.99   | National             | 9807        | HAZ, WAZ, WHZ | 3,5    | The South African Vitamin A Consultative Group. Children aged 6 to 71 months in South Africa, 1994: their anthropometric, vitamin A, iron and immunisation coverage status. Johannesburg, South Africa, 1995 (and additional analysis).                                                                                                                                                                                                    |
| South Africa    | 1999      | 12-59.99  | National             | 1556        | HAZ, WAZ, WHZ | 3,5    | Labadarios D, Steyn NP, Maunder E, MacIntyre U, Gericke G, Swart R, et al. The National Food Consumption Survey (NFCS): South Africa, 1999. Public Health Nutrition 2005;8:533-43 (and additional analysis).                                                                                                                                                                                                                               |
| South Africa    | 2003-2004 | 0-59.99   | National             | 1310        | HAZ, WAZ, WHZ | 1      | DHS                                                                                                                                                                                                                                                                                                                                                                                                                                        |
| South Africa    | 2005      | 12-35.99  | National             | 846         | HAZ, WAZ, WHZ | 3,5    | Department of Health, Republic of South Africa. National Food Consumption Survey - Fortification Baseline: Stellenbosch, South Africa: Directorate: Nutrition, Department of Health. 2005                                                                                                                                                                                                                                                  |
| South Africa    | 2008      | 0-59.99   | National             | 2079        | HAZ, WAZ, WHZ | 3      | Ardington C, Case A. National income dynamics study (NIDS). Health: Analysis of the NIDS wave 1 dataset. Discussion paper no. 2. South Africa: The Presidency Republic of South Africa and SALDRU, 2009. <a href="http://www.nids.uct.ac.za/home/">http://www.nids.uct.ac.za/home/</a> accessed 15 April 2011.                                                                                                                             |
| Sri Lanka       | 1987      | 3-35.99   | National             | 1999        | HAZ, WAZ, WHZ | 1      | DHS                                                                                                                                                                                                                                                                                                                                                                                                                                        |
| Sri Lanka       | 1993      | 3-59.99   | National             | 3068        | HAZ, WAZ, WHZ | 3,5    | Department of Census and Statistics, Ministry of Finance, Planning, Ethnic Affairs and National Inte Sri Lanka demographic and health survey 1993. Colombo, Sri Lanka, 1995.                                                                                                                                                                                                                                                               |
| Sri Lanka       | 1995      | 3-59.99   | National             | 2782        | HAZ, WAZ, WHZ | 3,5    | Ramanujam P and Nestel P. Preliminary report on the fourth national nutrition and health survey July - August, 1995. The Ceylon Journal of Medical Science 1997;40:13-24.                                                                                                                                                                                                                                                                  |
| Sri Lanka       | 1995-1996 | 6-59.99   | National             | 2304        | HAZ, WAZ, WHZ | 3,5    | Medical Research Institute of the Ministry of Health and Indigenous Medicine. Vitamin A deficiency status of children in Sri Lanka, 1995/1996: A survey report. Colombo, Sri Lanka, 1998.                                                                                                                                                                                                                                                  |
| Sri Lanka       | 2000      | 3-59.99   | National             | 2512        | HAZ, WAZ, WHZ | 2      | Department of Census and Statistics and Ministry of Health, Nutrition and Welfare. Sri Lanka demographic and health survey 2000. Colombo, Sri Lanka, 2001 (and additional analysis).                                                                                                                                                                                                                                                       |
| Sri Lanka       | 2001      | 6-59.99   | National             | 1716        | HAZ, WAZ, WHZ | 3,5    | Medical Research Institute of the Department of Health Services, Ministry of Health, Nutrition and Welfare. Assessment of anaemia status in Sri Lanka, 2001: A survey report. Colombo, Sri Lanka, 2003.                                                                                                                                                                                                                                    |



| Country   | Year      | Age range | Administrative level | Sample size | Indicators    | Notes* | Survey (when individual level data available) or source (when summary statistics available)                                                                                                                                                                                                                              |
|-----------|-----------|-----------|----------------------|-------------|---------------|--------|--------------------------------------------------------------------------------------------------------------------------------------------------------------------------------------------------------------------------------------------------------------------------------------------------------------------------|
| Sri Lanka | 2006-2007 | 0-59.99   | National             | 6648        | HAZ, WAZ, WHZ | 3      | Department of Census and Statistics, Ministry of Health Care and Nutrition. Sri Lanka demographic and health survey 2006/07: Preliminary report and selected tables from the chapters of the final report (I:\UnitData\SURVEILLANCE\GDCGM\data sets\Sri Lanka\DHS_MoH 2006_07_WHO\DHS_web_links.htm, accessed 03/07/09). |
| Sri Lanka | 2009      | 0-59.99   | National             | 2589        | HAZ, WAZ, WHZ | 2      | Jayatissa R. Nutrition and food security survey 2009. Colombo, Sri Lanka: Medical Research Institute, 2010.                                                                                                                                                                                                              |
| Sudan     | 1990      | 0-59.99   | First admin level    | 1516        | WHZ           | 2,5    | Ministry of Health. Report on the nutrition survey in Red Sea province, Eastern region. Khartoum, Sudan; 1990.                                                                                                                                                                                                           |
| Sudan     | 1990      | 0-59.99   | First admin level    | 1767        | WHZ           | 2,5    | Ministry of Health. Report on the nutrition survey in North Kordofan province, Kordofan region. Khartoum, Sudan; 1990.                                                                                                                                                                                                   |
| Sudan     | 1991      | 0-59.99   | First admin level    | 2834        | WHZ           | 2,5    | Ministry of Health. Report on the nutrition survey in Red Sea districts, Eastern State. Khartoum, Sudan; 1991.                                                                                                                                                                                                           |
| Sudan     | 1991      | 0-59.99   | First admin level    | 1181        | WHZ           | 2,5    | Ministry of Health. Report on the nutrition survey in the South Provinces of Eastern State. Khartoum, Sudan; 1991.                                                                                                                                                                                                       |
| Sudan     | 1992      | 0-59.99   | First admin level    | 3282        | WHZ           | 3,5    | Ministry of Health. Report on the nutrition monitoring survey in the Eastern State. Khartoum, Sudan; 1992.                                                                                                                                                                                                               |
| Sudan     | 1992      | 0-59.99   | First admin level    | 557         | WHZ           | 3,5    | Ministry of Health. Report on the nutrition survey in White Nile provinces, Central State. Khartoum, Sudan; 1992.                                                                                                                                                                                                        |
| Sudan     | 1992      | 0-59.99   | First admin level    | 493         | WHZ           | 3,5    | Ministry of Health. Report on the nutrition survey in White Nile provinces, Central State. Khartoum, Sudan; 1992.                                                                                                                                                                                                        |
| Sudan     | 1992      | 0-59.99   | First admin level    | 1688        | WHZ           | 3,5    | Ministry of Health. Report on the nutrition survey in White Nile provinces, Central State. Khartoum, Sudan; 1992.                                                                                                                                                                                                        |
| Sudan     | 1992      | 0-59.99   | First admin level    | 321         | WHZ           | 3,5,8  | Ministry of Health. Report on the nutrition survey in White Nile provinces, Central State. Khartoum, Sudan; 1992.                                                                                                                                                                                                        |
| Sudan     | 1992      | 0-59.99   | First admin level    | 317         | WHZ           | 3,5,8  | Ministry of Health. Report on the nutrition survey in White Nile provinces, Central State. Khartoum, Sudan; 1992.                                                                                                                                                                                                        |
| Sudan     | 1993      | 0-59.99   | Regional             | 3418        | HAZ, WAZ, WHZ | 1      | PAPCHILD Sudan                                                                                                                                                                                                                                                                                                           |
| Sudan     | 1994      | 0-59.99   | First admin level    | 1050        | WHZ           | 3,5    | Federal Ministry of Health. Report on the nutrition monitoring survey in Algezero State. Sudan; 1994.                                                                                                                                                                                                                    |
| Sudan     | 1994      | 0-59.99   | First admin level    | 2253        | WHZ           | 3,5    | Federal Ministry of Health. Report on the nutrition survey in all Kordofan States. North Kordofan State, Sudan; 1994.                                                                                                                                                                                                    |
| Sudan     | 1994      | 0-59.99   | Regional             | 1407        | WHZ           | 3,5    | Ministry of Health. Report on the nutrition survey in Kordofan State. El Obeid, Sudan; 1994.                                                                                                                                                                                                                             |
| Sudan     | 1995      | 0-59.99   | Regional             | 3454        | HAZ, WAZ, WHZ | 2      | Federal Ministry of Health, WHO, Ministries of Health/Nutrition Departments of 6 states. Comprehensive nutrition survey. National Nutrition Department. Khartoum, Sudan, 1997 (and additional analysis).                                                                                                                 |
| Sudan     | 1995      | 0-59.99   | National             | 8057        | WHZ           | 3,5    | Sudan multiple indicator cluster survey 1995 (MICS). Khartoum, Sudan, 1995 (and additional analysis).                                                                                                                                                                                                                    |
| Sudan     | 2000      | 0-59.99   | Regional             | 18234       | HAZ, WAZ, WHZ | 1      | MICS (North Sudan)                                                                                                                                                                                                                                                                                                       |
| Sudan     | 2000      | 1-59.99   | Regional             | 877         | HAZ, WAZ, WHZ | 1      | MICS (South Sudan)                                                                                                                                                                                                                                                                                                       |
| Sudan     | 2006      | 0-59.99   | National             | 19802       | HAZ, WAZ, WHZ | 2      | Government of National Unity and Government of Southern Sudan. Sudan household health survey (SHHS) - 2006. Khartoum and Juba: Government of National Unity, Government of Southern Sudan, December 2007 (additional analysis conducted by PAPFAM, June 2009).                                                           |
| Sudan     | 2010      | 0-59.99   | National             | NR          | HAZ, WAZ, WHZ | 3,7    | National Ministry of Health and Central Bureau of Statistics, Sudan Sudan Household Health Survey Second Round 2010 Summary Report, August 2011                                                                                                                                                                          |
| Suriname  | 2000      | 0-59.99   | National             | 1748        | HAZ, WAZ, WHZ | 1      | MICS                                                                                                                                                                                                                                                                                                                     |

| Country               | Year      | Age range | Administrative level | Sample size | Indicators    | Notes* | Survey (when individual level data available) or source (when summary statistics available)                                                                                                                                                                       |
|-----------------------|-----------|-----------|----------------------|-------------|---------------|--------|-------------------------------------------------------------------------------------------------------------------------------------------------------------------------------------------------------------------------------------------------------------------|
| Suriname              | 2006      | 0-59.99   | National             | 1991        | HAZ, WAZ, WHZ | 2      | General Bureau of Statistics, Ministry of Planning and Development Cooperation and Ministry of Social Affairs and Housing. Suriname multiple indicator cluster survey 2006, Final Report (MICS3). Paramaribo, Suriname, 2009 (and additional analysis).           |
| Swaziland             | 2000      | 0-59.99   | National             | 3200        | HAZ, WAZ, WHZ | 1      | MICS                                                                                                                                                                                                                                                              |
| Swaziland             | 2006-2007 | 0-59.99   | National             | 2027        | HAZ, WAZ, WHZ | 1      | DHS                                                                                                                                                                                                                                                               |
| Swaziland             | 2008      | 0-59.99   | National             | 3823        | HAZ, WAZ, WHZ | 3      | Ministry of Health, National Nutrition Council. Swaziland national nutrition survey report (November 2008). Mbabane, Swaziland: Ministry of Health, 2009.                                                                                                         |
| Swaziland             | 2010      | 0-59.99   | National             | 2555        | HAZ, WAZ, WHZ | 2      | Central Statistical Office, Kingdom of Swaziland Multiple Indicator Cluster Survey 2010 Preliminary Report, Central Statistical Office, Kingdom of Swaziland                                                                                                      |
| Syrian Arab Republic  | 1993      | 0-59.99   | National             | 3959        | HAZ, WAZ, WHZ | 1      | PAPCHILD Syrian Arab Republic                                                                                                                                                                                                                                     |
| Syrian Arab Republic  | 1995      | 0-59.99   | National             | 2425        | HAZ, WAZ, WHZ | 3,5    | Prime Minister's Council. Multiple indicator cluster survey in the Syrian Arab Republic (MICS). Central Bureau of Statistics. Damascus, The Syrian Arab Republic, 1996.                                                                                           |
| Syrian Arab Republic  | 2000      | 0-59.99   | National             | 6262        | HAZ, WAZ, WHZ | 3,5    | Council of Ministers, Central Office of Statistics, Arab Republic of Syria, and UNICEF [Multiple Indicator Cluster Survey II (MICS II) concerning Child Health and Welfare. Main report.] Damascus, Syrian Arab Republic: UNICEF, 2002 (and additional analysis). |
| Syrian Arab Republic  | 2001      | 0-59.99   | National             | 6367        | HAZ, WAZ, WHZ | 2      | League of Arab States (PAPFAM) and Syrian Arab Republic, Office of the Prime Minister, Central Bureau of Statistics. The family health survey in the Syrian Arab Republic. Principal Report. Cairo: The League of Arab States, 2002 (and additional analysis).    |
| Syrian Arab Republic  | 2006      | 0-59.99   | National             | 9906        | HAZ, WAZ, WHZ | 1      | MICS                                                                                                                                                                                                                                                              |
| Syrian Arab Republic  | 2009      | 0-59.99   | National             | 14392       | HAZ, WAZ, WHZ | 2      | League of Arab States and Syrian Arab Republic. Family health survey of the Arab Republic of Syria 2009: Principal report (PAPFAM). Cairo: The League of Arab States, 2011 (and additional analysis).                                                             |
| São Tomé and Príncipe | 1986      | 0-59.99   | National             | 2155        | HAZ, WAZ, WHZ | 3,5    | Ministerio de Saude. Estado nutricional e cobertura vacinal des crianças menores de 5 anos na. Seccao de Nutricao. Sao Tome, Republica Democratica de Sao Tome e Principe, 1986 (and additional analysis).                                                        |
| São Tomé and Príncipe | 2000      | 0-59.99   | National             | 1677        | HAZ, WAZ, WHZ | 1      | MICS                                                                                                                                                                                                                                                              |
| São Tomé and Príncipe | 2006      | 0-59.99   | National             | 2848        | HAZ, WAZ, WHZ | 3,5    | Institute of National Statistics (INE). Democratic Republic of Sao Tome e Principe 2006 multiple indicator cluster survey (MICS3): Final report. Sao Tome: INE and UNICEF, 2007.                                                                                  |
| São Tomé and Príncipe | 2008-2009 | 0-59.99   | National             | 1430        | HAZ, WAZ, WHZ | 1      | DHS                                                                                                                                                                                                                                                               |
| Tajikistan            | 1999      | 6-59.99   | National             | 3599        | HAZ, WHZ      | 3,5    | McBurney R and Mason F. National nutrition survey, Tajikistan (September/October 1999). London, UK: Action Against Hunger UK, 2000 (and additional analysis).                                                                                                     |
| Tajikistan            | 2000      | 6-59.99   | National             | 5657        | HAZ, WHZ      | 3,5    | McLachlan E. National nutrition survey of Tajikistan (September/October 2000). London, UK: Action Against Hunger UK, 2001 (and additional analysis).                                                                                                              |
| Tajikistan            | 2001      | 6-59.99   | National             | 3704        | HAZ, WHZ      | 3,5    | Walters T, Brown R. Representative national nutrition survey Tajikistan (Sughd, RRS, Kouliab and Kurgan Teppe regions), October/November 2001. London, UK: Action Against Hunger UK, 2002 (and additional analysis).                                              |
| Tajikistan            | 2002      | 6-59.99   | National             | 4543        | HAZ, WHZ      | 3,5    | Moloney G and Brown R. National nutrition survey Tajikistan, May/June 2002. Action against Hunger and European Community Humanitarian Office, 2002 (and additional analysis).                                                                                     |

| Country     | Year      | Age range | Administrative level | Sample size | Indicators    | Notes* | Survey (when individual level data available) or source (when summary statistics available)                                                                                                                                                                                                                                                                                                                                                               |
|-------------|-----------|-----------|----------------------|-------------|---------------|--------|-----------------------------------------------------------------------------------------------------------------------------------------------------------------------------------------------------------------------------------------------------------------------------------------------------------------------------------------------------------------------------------------------------------------------------------------------------------|
| Tajikistan  | 2003      | 6-59.99   | National             | 4654        | HAZ, WHZ      | 3,5    | Baronina E, Brasell-Jones T, Petersen J, Purves M. National nutrition and water & sanitation survey, Tajikistan, October 2003. Dushanbe, Tajikistan: Action Against Hunger (lead agency nutrition) and Mercy Corps (lead agency wat/san), 2004 (and additional analysis).                                                                                                                                                                                 |
| Tajikistan  | 2005      | 0-59.99   | National             | 4065        | HAZ, WAZ, WHZ | 1      | MICS                                                                                                                                                                                                                                                                                                                                                                                                                                                      |
| Tajikistan  | 2007      | 0-59.99   | National             | 2544        | HAZ, WAZ, WHZ | 3      | State Committee on Statistics [Republic of Tajikistan] and UNICEF. Tajikistan living standards measurement survey 2007 (TLSS): Indicators at a glance. Dushanbe, Republic of Tajikistan: State Committee on Statistics and UNICEF, 2009 ( <a href="http://www.tojikinfo.tj/en/.../UNICEF%20TLSS%20Report%20Eng.pdf">www.tojikinfo.tj/en/.../UNICEF%20TLSS%20Report%20Eng.pdf</a> , accessed 09/06/2011).                                                  |
| Thailand    | 1987      | 3-35.99   | National             | 1848        | HAZ, WAZ, WHZ | 1      | DHS                                                                                                                                                                                                                                                                                                                                                                                                                                                       |
| Thailand    | 1993      | 0-59.99   | National             | 11748       | HAZ, WAZ, WHZ | 3,5    | Kitvorapat W, Chaotilittakul N, Sinawat S, Wanaratana L. Random survey on nutritional status of children of ages under five. Thailand Journal of Health Promotion and Environmental Health 1996;19:57-66 (and additional analysis).                                                                                                                                                                                                                       |
| Thailand    | 1995      | 0-59.99   | National             | 4178        | HAZ, WAZ, WHZ | 3,5    | Ministry of Public Health. The fourth national nutrition survey of Thailand 1995. Department of Health. Bangkok, Thailand 1998 (and additional analysis).                                                                                                                                                                                                                                                                                                 |
| Thailand    | 1997      | 12-59.99  | National             | 2599        | HAZ, WAZ, WHZ | 1      | NHES 2                                                                                                                                                                                                                                                                                                                                                                                                                                                    |
| Thailand    | 2005-2006 | 0-59.99   | National             | 9002        | HAZ, WAZ, WHZ | 1      | MICS                                                                                                                                                                                                                                                                                                                                                                                                                                                      |
| Timor-Leste | 2002      | 0-59.99   | National             | 4133        | HAZ, WAZ, WHZ | 2      | Multiple indicator cluster survey (MICS - 2002). UNICEF, Dili, Timor-Leste, 2003 (and additional analysis).                                                                                                                                                                                                                                                                                                                                               |
| Timor-Leste | 2003      | 0-59.99   | National             | 5255        | HAZ, WAZ, WHZ | 3,5    | Ministry of Health (MOH) Timor Leste, University of Newcastle, Australian National University and ACIL. Timor Leste 2003 demographic and health survey. Newcastle, NSW, Australia: MOH and University of Newcastle, 2003 (and additional analysis).                                                                                                                                                                                                       |
| Timor-Leste | 2009-2010 | 0-59.99   | Regional             | 6975        | HAZ, WAZ, WHZ | 1,6    | DHS                                                                                                                                                                                                                                                                                                                                                                                                                                                       |
| Togo        | 1988      | 6-59.99   | National             | 2866        | HAZ, WAZ, WHZ | 3,5    | Ministère de la Santé Publique, Ministère du Plan et des Mines, Ministère du Développement Rural. Politique nationale d'alimentation et de nutrition. Document de synthèse. Lomé, République Togolaise, 1989 (and additional analysis).                                                                                                                                                                                                                   |
| Togo        | 1988      | 0-35.99   | National             | 1656        | HAZ, WAZ, WHZ | 1      | DHS                                                                                                                                                                                                                                                                                                                                                                                                                                                       |
| Togo        | 1996      | 0-59.99   | National             | 3761        | HAZ, WAZ      | 3,5    | Enquête nationale sur la situation des enfants au Togo en 1995 (MICS -Togo -96). Lomé, République Togolaise: Ministère du Plan et de l'Amenagement du Territoire et UNICEF, September 1996.                                                                                                                                                                                                                                                               |
| Togo        | 1998      | 0-35.99   | National             | 3614        | HAZ, WAZ, WHZ | 1      | DHS                                                                                                                                                                                                                                                                                                                                                                                                                                                       |
| Togo        | 2006      | 0-59.99   | National             | 3580        | HAZ, WAZ, WHZ | 2      | Direction Generale de la Statistique et de la Comptabilité Nationale and UNICEF. Résultats de l'enquête nationale à indicateurs multiples, Togo 2006. Rapport final, août 2007. <a href="http://www.childinfo.org/mics3_surveys.html">http://www.childinfo.org/mics3_surveys.html</a> , accessed 8 January 2009 (and additional analysis).                                                                                                                |
| Togo        | 2008      | 0-59.99   | National             | 3204        | HAZ, WAZ, WHZ | 3      | Ministère de la Santé et UNICEF. Rapport d'enquête nationale nutrition et survie des enfants de 0 à 59 mois, pratique d'alimentation de nourrisson et du jeune enfants. SMART. Togo, décembre 2008 (30/12/09 <a href="http://ochaonline.un.org/CoordinationIASC/Securitealimentairenutrition/tabid/5651/language/fr-FR/Default.aspx">http://ochaonline.un.org/CoordinationIASC/Securitealimentairenutrition/tabid/5651/language/fr-FR/Default.aspx</a> ). |

| Country                     | Year      | Age range | Administrative level | Sample size | Indicators    | Notes* | Survey (when individual level data available) or source (when summary statistics available)                                                                                                                                                                                                                              |
|-----------------------------|-----------|-----------|----------------------|-------------|---------------|--------|--------------------------------------------------------------------------------------------------------------------------------------------------------------------------------------------------------------------------------------------------------------------------------------------------------------------------|
| Togo                        | 2010      | 0-59.99   | National             | 4752        | HAZ, WAZ, WHZ | 3      | Direction Generale de la Statistique et de la Comptabilite Nationale, Togo Togo. Enquete par grappes a indicateurs multiple (MICS) 2010: Resultats preliminaires, Mai 2011, Direction Generale de la Statistique et de la Comptabilite Nationale                                                                         |
| Tonga                       | 1986      | 0-59.99   | National             | 1094        | HAZ, WHZ      | 3,5    | Maclean E, Badcock J, Bach F. The 1986 national nutrition survey of the Kingdom of Tonga. Technical report National Food and Nutrition Committee. Nuku'alofa: Government of the Kingdom of Tonga, 1987 (and additional analysis).                                                                                        |
| Trinidad and Tobago         | 1987      | 3-35.99   | National             | 838         | HAZ, WAZ, WHZ | 1      | DHS                                                                                                                                                                                                                                                                                                                      |
| Trinidad and Tobago         | 2000      | 0-59.99   | National             | 778         | HAZ, WAZ, WHZ | 1      | MICS                                                                                                                                                                                                                                                                                                                     |
| Tunisia                     | 1988      | 3-35.99   | National             | 2007        | HAZ, WAZ, WHZ | 1      | DHS                                                                                                                                                                                                                                                                                                                      |
| Tunisia                     | 1993-1994 | 0-59.99   | National             | 3030        | HAZ, WAZ, WHZ | 1      | PAPCHILD Tunisia                                                                                                                                                                                                                                                                                                         |
| Tunisia                     | 1996-1997 | 0-59.99   | National             | 891         | HAZ, WAZ, WHZ | 3,5    | Ministère de la Santé Publique, Institut National de Nutrition et de Technologie Alimentaire. Enquête nationale 1996-1997. Evaluation de l'état nutritionnel de la population Tunisienne: Rapport national. Tunis, Tunisia: Sotepa Grafic, 1998 (and additional analysis).                                               |
| Tunisia                     | 2000      | 0-59.99   | National             | 10310       | HAZ, WAZ, WHZ | 3,5    | Tunisia multiple indicator cluster survey II 2000 (MICS II). Tunis, Tunisia: 2000 (and additional analysis).                                                                                                                                                                                                             |
| Tunisia                     | 2006      | 0-59.99   | National             | 2842        | HAZ, WAZ, WHZ | 2      | Ministère de la Santé Publique, Office National de la Famille et de la Population et UNICEF. Enquête sur la santé et le bien être de la mère et l'enfant: MICS 3. Tunis, Tunisia, 2008 (and additional analysis conducted by PAPFAM).                                                                                    |
| Turkey                      | 1993      | 0-59.99   | National             | 3134        | HAZ, WAZ, WHZ | 1      | DHS                                                                                                                                                                                                                                                                                                                      |
| Turkey                      | 1995      | 0-59.99   | National             | 2871        | WAZ           | 3,5    | Ministry of Health. Multiple indicator cluster survey in Turkey 1995. Ankara: National Bureau of Statistics, 1996 (and additional analysis).                                                                                                                                                                             |
| Turkey                      | 1998      | 0-59.99   | National             | 2774        | HAZ, WAZ, WHZ | 1      | DHS                                                                                                                                                                                                                                                                                                                      |
| Turkey                      | 2003-2004 | 0-59.99   | National             | 4005        | HAZ, WAZ, WHZ | 1      | DHS                                                                                                                                                                                                                                                                                                                      |
| Turkmenistan                | 2000      | 0-59.99   | National             | 2928        | HAZ, WAZ, WHZ | 3,5    | Gurbansoltan Eje Clinical Research Center for MCH (GECRCMCH), Ministry of Health & Medical Industry. Turkmenistan demographic and health survey 2000. Demographic and Health Surveys. Calverton, Maryland, USA: GECRCMCH and ORC Macro, 2001 (and additional analysis).                                                  |
| Uganda                      | 1988-1989 | 0-59.99   | National             | 3649        | HAZ, WAZ, WHZ | 1      | DHS                                                                                                                                                                                                                                                                                                                      |
| Uganda                      | 1995      | 0-47.99   | National             | 4540        | HAZ, WAZ, WHZ | 1      | DHS                                                                                                                                                                                                                                                                                                                      |
| Uganda                      | 2000-2001 | 0-59.99   | National             | 5114        | HAZ, WAZ, WHZ | 1      | DHS                                                                                                                                                                                                                                                                                                                      |
| Uganda                      | 2006      | 0-59.99   | National             | 2354        | HAZ, WAZ, WHZ | 1      | DHS                                                                                                                                                                                                                                                                                                                      |
| United Republic of Tanzania | 1991      | 0-59.99   | First admin level    | 3446        | HAZ, WAZ, WHZ | 3,5    | Mpanju WFK, Msamanga GI, Gerverdinck IHA, Kabalimu TK, Kawau FMN, Rongo LMB, et al. Assessment of nutritional status and associated factors of under-fives in Dar es Salaam region from 9-23 September 1991. Institute of Public Health, Muhimbili University College of Health Sciences. Dar es Salaam, Tanzania; 1992. |
| United Republic of Tanzania | 1991-1992 | 0-59.99   | National             | 6311        | HAZ, WAZ, WHZ | 1      | DHS                                                                                                                                                                                                                                                                                                                      |
| United Republic of Tanzania | 1996      | 0-59.99   | National             | 5298        | HAZ, WAZ, WHZ | 1      | DHS                                                                                                                                                                                                                                                                                                                      |
| United Republic of Tanzania | 1996      | 0-59.99   | Regional             | 3939        | HAZ, WAZ, WHZ | 3,5    | Monitoring progress towards the goals of the world summit for children through multiple indicator cluster survey, 1996 (MICS). Bureau of Statistics. Dar es Salaam, United Republic of Tanzania, 1996.                                                                                                                   |

| Country                            | Year      | Age range | Administrative level | Sample size | Indicators    | Notes* | Survey (when individual level data available) or source (when summary statistics available)                                                                                                                                                                                                                                                                                              |
|------------------------------------|-----------|-----------|----------------------|-------------|---------------|--------|------------------------------------------------------------------------------------------------------------------------------------------------------------------------------------------------------------------------------------------------------------------------------------------------------------------------------------------------------------------------------------------|
| United Republic of Tanzania        | 1996      | 0-59.99   | First admin level    | 1654        | HAZ, WAZ, WHZ | 3,5    | Monitoring progress towards the goals of the world summit for children through multiple indicator cluster survey, 1996 (MICS). Bureau of Statistics. Dar es Salaam, United Republic of Tanzania, 1996.                                                                                                                                                                                   |
| United Republic of Tanzania        | 1999      | 0-59.99   | National             | 2510        | HAZ, WAZ, WHZ | 1      | DHS                                                                                                                                                                                                                                                                                                                                                                                      |
| United Republic of Tanzania        | 2004-2005 | 0-59.99   | National             | 7114        | HAZ, WAZ, WHZ | 1      | DHS                                                                                                                                                                                                                                                                                                                                                                                      |
| United Republic of Tanzania        | 2009-2010 | 0-59.99   | National             | 6740        | HAZ, WAZ, WHZ | 1      | DHS                                                                                                                                                                                                                                                                                                                                                                                      |
| Uzbekistan                         | 1996      | 0-35.99   | National             | 935         | HAZ, WAZ, WHZ | 1      | DHS                                                                                                                                                                                                                                                                                                                                                                                      |
| Uzbekistan                         | 2002      | 0-59.99   | National             | 2525        | HAZ, WAZ, WHZ | 2      | Analytical and Information Center, Ministry of Health of the Republic of Uzbekistan, State Department of Statistics, Ministry of Macroeconomics and Statistics [Uzbekistan], and ORC Macro. Uzbekistan health examination survey 2002. Demographic and Health Surveys. Calverton, Maryland, USA: Analytical and Information Center, State Department of Statistics, and ORC Macro, 2004. |
| Uzbekistan                         | 2006      | 0-59.99   | National             | 4704        | HAZ, WAZ, WHZ | 1      | MICS                                                                                                                                                                                                                                                                                                                                                                                     |
| Vanuatu                            | 1996      | 0-59.99   | National             | 1297        | HAZ, WAZ, WHZ | 3,5    | Department of Health [Vanuatu] and Australian Agency for International Development (AusAID). Report of the second national nutrition survey 1996. Government of the Republic of Vanuatu, Department of Health and AusAID, 1998 (and additional analysis).                                                                                                                                |
| Vanuatu                            | 2007      | 0-59.99   | National             | 1215        | HAZ, WAZ, WHZ | 1      | MICS                                                                                                                                                                                                                                                                                                                                                                                     |
| Venezuela (Bolivarian Republic of) | 1987      | 0-59.99   | National             | 18023       | HAZ, WAZ, WHZ | 3,5    | Proyecto Venezuela 1987. Caracas: Centro de estudios sobre crecimiento y desarrollo de la poblacion venezolana, 1995 (and additional analysis).                                                                                                                                                                                                                                          |
| Viet Nam                           | 1987-1989 | 0-59.99   | National             | 7044        | HAZ, WAZ, WHZ | 3,5    | Ministry of Health. Report on re-analyzed data collected by the General Nutrition Survey 1987-89. Department of Planning. Hanoi, Viet Nam, 1991 (and additional analysis).                                                                                                                                                                                                               |
| Viet Nam                           | 1992-1993 | 0-59.99   | National             | 2833        | HAZ, WAZ, WHZ | 2      | Viet Nam living standards survey 1992-93 (VNLSS). Washington, D.C.: The World Bank, 1998 (and additional analysis).                                                                                                                                                                                                                                                                      |
| Viet Nam                           | 1994      | 0-59.99   | National             | 37764       | HAZ, WAZ, WHZ | 3,5    | Bloem MW, Gorstein J. Viet Nam: Xerophthalmia free; 1994 national Vitamin A deficiency and protein-energy malnutrition prevalence survey. Consultancy report 5-17 March 1995. National Institute of Nutrition. Hanoi, Viet Nam, 1995 (and additional analysis).                                                                                                                          |
| Viet Nam                           | 1997-1998 | 0-59.99   | National             | 2848        | HAZ, WAZ, WHZ | 1      | Vietnam Living Standards Survey, 1997-98                                                                                                                                                                                                                                                                                                                                                 |
| Viet Nam                           | 1998      | 0-59.99   | National             | 12919       | HAZ, WAZ, WHZ | 3,5    | Dibley MJ, Khoi HH, Khan NC, Tam NC, Tuyen LD, Do TT, Mai LB. National protein energy malnutrition survey, Viet Nam 1998. National Institute of Nutrition, Hanoi, Viet Nam and Centre for Clinical Epidemiology & Biostatistics, Newcastle, Australia, 1999 (and additional analysis).                                                                                                   |
| Viet Nam                           | 1999      | 0-59.99   | National             | 1539        | HAZ, WAZ, WHZ | 2      | Tuyen le D. Annual national nutrition monitoring. Nutrition Surveillance Department. Hanoi, Vietnam: National Institute of Nutrition, 2009 (and additional analysis).                                                                                                                                                                                                                    |
| Viet Nam                           | 1999      | 0-59.99   | National             | 93469       | HAZ, WAZ, WHZ | 3,5    | Khoi HH, Khan NC, Tuyen LD, Ngu T, Xuan TT. 1999 Viet Nam - child nutrition situation. The national goal for child malnutrition control. Hanoi: Medical Publishing House, 2000 (and additional analysis).                                                                                                                                                                                |
| Viet Nam                           | 2000      | 0-59.99   | National             | 94469       | HAZ, WAZ, WHZ | 3,5    | National Institute of Nutrition and General Statistical Office. 2000 - Vietnam child and mother nutrition situation. Hanoi: Medical Publishing House, 2001 (and additional analysis).                                                                                                                                                                                                    |

| Country  | Year      | Age range | Administrative level | Sample size | Indicators    | Notes* | Survey (when individual level data available) or source (when summary statistics available)                                                                                                                                                                                                                                                                             |
|----------|-----------|-----------|----------------------|-------------|---------------|--------|-------------------------------------------------------------------------------------------------------------------------------------------------------------------------------------------------------------------------------------------------------------------------------------------------------------------------------------------------------------------------|
| Viet Nam | 2000      | 0-59.99   | National             | 2983        | HAZ, WAZ, WHZ | 1      | MICS                                                                                                                                                                                                                                                                                                                                                                    |
| Viet Nam | 2000      | 0-59.99   | National             | 1578        | HAZ, WAZ, WHZ | 2      | Tuyen le D. Annual national nutrition monitoring. Nutrition Surveillance Department. Hanoi, Vietnam: National Institute of Nutrition, 2009 (and additional analysis).                                                                                                                                                                                                   |
| Viet Nam | 2001-2002 | 0-59.99   | National             | 11145       | HAZ, WAZ, WHZ | 1      | VNHS 2002                                                                                                                                                                                                                                                                                                                                                               |
| Viet Nam | 2002      | 0-59.99   | National             | 1531        | HAZ, WAZ, WHZ | 2      | Tuyen le D. Annual national nutrition monitoring. Nutrition Surveillance Department. Hanoi, Vietnam: National Institute of Nutrition, 2009 (and additional analysis).                                                                                                                                                                                                   |
| Viet Nam | 2003      | 0-59.99   | National             | 1457        | HAZ, WAZ, WHZ | 2      | Tuyen le D. Annual national nutrition monitoring. Nutrition Surveillance Department. Hanoi, Vietnam: National Institute of Nutrition, 2009 (and additional analysis).                                                                                                                                                                                                   |
| Viet Nam | 2004      | 0-59.99   | National             | 1499        | HAZ, WAZ, WHZ | 2      | Tuyen le D. Annual national nutrition monitoring. Nutrition Surveillance Department. Hanoi, Vietnam: National Institute of Nutrition, 2009 (and additional analysis).                                                                                                                                                                                                   |
| Viet Nam | 2005      | 0-59.99   | National             | 1493        | HAZ, WAZ, WHZ | 2      | Tuyen le D. Annual national nutrition monitoring. Nutrition Surveillance Department. Hanoi, Vietnam: National Institute of Nutrition, 2009 (and additional analysis).                                                                                                                                                                                                   |
| Viet Nam | 2006      | 0-59.99   | National             | 2680        | HAZ, WAZ, WHZ | 3      | National household living standard survey 2006 (VHLSS2006). Results reported in Viet Nam multiple indicator cluster survey 2006 - MICS3. Ha Noi, Viet Nam, 2007 (accessed 3 July 2008 <a href="http://www.childinfo.org/files/MICS3_Vietnam_FinalReport_2006.pdf">http://www.childinfo.org/files/MICS3_Vietnam_FinalReport_2006.pdf</a> ).                              |
| Viet Nam | 2006      | 0-59.99   | National             | 1532        | HAZ, WAZ, WHZ | 2      | Tuyen le D. Annual national nutrition monitoring. Nutrition Surveillance Department. Hanoi, Vietnam: National Institute of Nutrition, 2009 (and additional analysis).                                                                                                                                                                                                   |
| Viet Nam | 2007      | 0-59.99   | National             | 1506        | HAZ, WAZ, WHZ | 2      | Tuyen le D. Annual national nutrition monitoring. Nutrition Surveillance Department. Hanoi, Vietnam: National Institute of Nutrition, 2009 (and additional analysis).                                                                                                                                                                                                   |
| Viet Nam | 2008      | 0-59.99   | National             | 1483        | HAZ, WAZ, WHZ | 2      | Tuyen le D. Annual national nutrition monitoring. Nutrition Surveillance Department. Hanoi, Vietnam: National Institute of Nutrition, 2009 (and additional analysis).                                                                                                                                                                                                   |
| Yemen    | 1991      | 0-59.99   | National             | 2520        | HAZ, WAZ, WHZ | 1      | PAPCHILD Yemen                                                                                                                                                                                                                                                                                                                                                          |
| Yemen    | 1996      | 0-59.99   | National             | 3833        | HAZ, WAZ, WHZ | 3,5    | Yemen multiple indicator cluster survey (March 1996): Final results. Ministry of Planning and Development. Sanaa, Republic of Yemen, 1996 (and additional analysis).                                                                                                                                                                                                    |
| Yemen    | 1997      | 0-59.99   | National             | 10793       | HAZ, WAZ, WHZ | 2      | Yemen demographic and maternal and child health survey 1997. Demographic and Health Surveys. Central Statistical Organization. Sana'a, Yemen, 1998 (and additional analysis).                                                                                                                                                                                           |
| Yemen    | 2003      | 0-59.99   | National             | 12366       | HAZ, WAZ, WHZ | 2      | The Republic of Yemen Ministry of Health & Population, Central Statistical Organization an League of Arab States. The Yemen family health survey: Principal report. Pan Arab Project for Family Health. Cairo, Egypt: The Republic of Yemen Ministry of Health & Population, Central Statistical Organization an League of Arab States, 2004 (and additional analysis). |
| Yemen    | 2005-2006 | 0-59.99   | National             | 12704       | HAZ, WAZ, WHZ | 1      | Yemen Household Budget Survey 2005-2006                                                                                                                                                                                                                                                                                                                                 |
| Zambia   | 1992      | 0-59.99   | National             | 4888        | HAZ, WAZ, WHZ | 1      | DHS                                                                                                                                                                                                                                                                                                                                                                     |
| Zambia   | 1995      | 0-59.99   | National             | NR          | HAZ           | 3,5,7  | Food Security, Health and Nutrition Information System, National Commission for Development Planning, Central Statistics Office. Zambia's children in 1995: Key results of a survey to monitor progress towards goals for children (MICS2). Lusaka, Zambia: Government of the Republic of the Zambia, 1997 (and additional analysis).                                   |
| Zambia   | 1996-1997 | 0-59.99   | National             | 5470        | HAZ, WAZ, WHZ | 1      | DHS                                                                                                                                                                                                                                                                                                                                                                     |

| Country  | Year      | Age range | Administrative level | Sample size | Indicators    | Notes* | Survey (when individual level data available) or source (when summary statistics available)                                                                                                                                  |
|----------|-----------|-----------|----------------------|-------------|---------------|--------|------------------------------------------------------------------------------------------------------------------------------------------------------------------------------------------------------------------------------|
| Zambia   | 2001-2002 | 0-59.99   | National             | 5394        | HAZ, WAZ, WHZ | 1      | DHS                                                                                                                                                                                                                          |
| Zambia   | 2004-2005 | 0-59.99   | National             | 6865        | HAZ, WAZ, WHZ | 1      | Living Conditions Monitoring Survey IV                                                                                                                                                                                       |
| Zambia   | 2007      | 0-59.99   | National             | 5063        | HAZ, WAZ, WHZ | 1      | DHS                                                                                                                                                                                                                          |
| Zimbabwe | 1988-1989 | 3-59.99   | National             | 2448        | HAZ, WAZ, WHZ | 1      | DHS                                                                                                                                                                                                                          |
| Zimbabwe | 1994      | 0-35.99   | National             | 2081        | HAZ, WAZ, WHZ | 1      | DHS                                                                                                                                                                                                                          |
| Zimbabwe | 1999      | 0-59.99   | National             | 2610        | HAZ, WAZ, WHZ | 1      | DHS                                                                                                                                                                                                                          |
| Zimbabwe | 2005-2006 | 0-59.99   | National             | 3878        | HAZ, WAZ, WHZ | 1      | DHS                                                                                                                                                                                                                          |
| Zimbabwe | 2010-2011 | 0-59.99   | National             | 5240        | HAZ, WAZ, WHZ | 2      | Zimbabwe National Statistics Agency, MEASURE DHS Zimbabwe Demographic and Health Survey 2010-11: Preliminary Report. Harare, Zimbabwe and Calverton, Maryland, USA: Zimbabwe National Statistics Agency and ICF Macro, 2011. |

\*1=individual-level data; 2=means and prevalences; 3=only prevalences; 4=surveillance data; 5=estimate converted from NCHS standard to WHO standards; 6=data collection in Aileu province deemed unreliable, province excluded and study marked as regional; 7=sample size not reported, sample size assumed to be 400; 8=included in analysis because total sample size (including other age groups or regions) exceeds 400.

**Webtable 3a: Error in HAZ predictions of held-out data for different models. See Methods for details of the models.**

|                                                                                                    | No. of held-out observations | Median absolute error |                      |                    | Median relative error |                      |                    |      |      |      |      |
|----------------------------------------------------------------------------------------------------|------------------------------|-----------------------|----------------------|--------------------|-----------------------|----------------------|--------------------|------|------|------|------|
|                                                                                                    |                              | Main model            | Separate models (p*) | No covariates (p*) | Main model            | Separate models (p*) | No covariates (p*) |      |      |      |      |
| <b>Test 1: Holding out all studies from 10% of countries</b>                                       |                              |                       |                      |                    |                       |                      |                    |      |      |      |      |
| mean HAZ                                                                                           | 181                          | 0.21                  | 0.20                 | 0.16               | 0.28                  | 0.00                 | 0.15               | 0.14 | 0.56 | 0.19 | 0.00 |
| % HAZ < -2                                                                                         | 292                          | 6.02                  | 5.94                 | 0.36               | 8.05                  | 0.00                 | 0.17               | 0.17 | 0.19 | 0.25 | 0.00 |
| % HAZ < -3                                                                                         | 202                          | 3.62                  | 3.40                 | 0.57               | 4.12                  | 0.00                 | 0.27               | 0.26 | 0.26 | 0.30 | 0.00 |
| <b>Test 2: Holding out data based on a mixed pattern of missingness as described in Appendix 5</b> |                              |                       |                      |                    |                       |                      |                    |      |      |      |      |
| <b>All held-out observations</b>                                                                   |                              |                       |                      |                    |                       |                      |                    |      |      |      |      |
| mean HAZ                                                                                           | 250                          | 0.14                  | 0.17                 | 0.00               | 0.13                  | 0.11                 | 0.13               | 0.14 | 0.04 | 0.12 | 0.34 |
| % HAZ < -2                                                                                         | 244                          | 4.21                  | 4.27                 | 0.23               | 3.98                  | 0.34                 | 0.15               | 0.14 | 0.41 | 0.13 | 0.38 |
| % HAZ < -3                                                                                         | 298                          | 2.09                  | 2.48                 | 0.05               | 2.10                  | 0.35                 | 0.21               | 0.22 | 0.01 | 0.20 | 0.30 |
| <b>Hold-out algorithm</b>                                                                          |                              |                       |                      |                    |                       |                      |                    |      |      |      |      |
| All of the country's studies                                                                       |                              |                       |                      |                    |                       |                      |                    |      |      |      |      |
| mean HAZ                                                                                           | 17                           | 0.47                  | 0.38                 | 0.00               | 0.42                  | 0.43                 | 0.36               | 0.25 | 0.00 | 0.31 | 0.40 |
| % HAZ < -2                                                                                         | 41                           | 11.06                 | 11.60                | 0.09               | 12.86                 | 1.00                 | 0.40               | 0.40 | 0.10 | 0.27 | 0.64 |
| % HAZ < -3                                                                                         | 23                           | 4.10                  | 3.21                 | 0.00               | 4.42                  | 0.78                 | 0.32               | 0.24 | 0.00 | 0.30 | 0.36 |
| All of the country's 2000-2011 studies                                                             |                              |                       |                      |                    |                       |                      |                    |      |      |      |      |
| mean HAZ                                                                                           | 51                           | 0.11                  | 0.15                 | 0.03               | 0.13                  | 0.77                 | 0.10               | 0.14 | 0.01 | 0.10 | 0.71 |
| % HAZ < -2                                                                                         | 56                           | 3.74                  | 3.35                 | 0.73               | 3.38                  | 0.99                 | 0.13               | 0.10 | 0.91 | 0.12 | 0.79 |
| % HAZ < -3                                                                                         | 53                           | 2.27                  | 2.49                 | 0.79               | 2.57                  | 0.86                 | 0.24               | 0.22 | 0.73 | 0.28 | 0.51 |
| A random 1/3 of the country's studies                                                              |                              |                       |                      |                    |                       |                      |                    |      |      |      |      |
| mean HAZ                                                                                           | 99                           | 0.17                  | 0.13                 | 0.78               | 0.14                  | 0.07                 | 0.13               | 0.12 | 0.97 | 0.13 | 0.17 |
| % HAZ < -2                                                                                         | 147                          | 3.61                  | 3.18                 | 0.68               | 3.45                  | 0.33                 | 0.12               | 0.11 | 0.83 | 0.11 | 0.48 |
| % HAZ < -3                                                                                         | 111                          | 2.10                  | 2.57                 | 0.13               | 1.99                  | 0.88                 | 0.21               | 0.23 | 0.01 | 0.20 | 0.58 |
| Held-out mean and % < -3 when % < -2 is known                                                      |                              |                       |                      |                    |                       |                      |                    |      |      |      |      |
| mean HAZ                                                                                           | 83                           | 0.10                  | 0.16                 | 0.00               | 0.10                  | 0.72                 | 0.10               | 0.15 | 0.00 | 0.10 | 0.89 |
| % HAZ < -3                                                                                         | 111                          | 1.76                  | 1.86                 | 0.00               | 1.76                  | 0.19                 | 0.16               | 0.19 | 0.01 | 0.16 | 0.30 |

\* p-values for model error comparisons were calculated using the non-parametric Wilcoxon signed-rank test for paired data. The p-values are calculated assuming independence of the held-out observations. They should therefore be interpreted as an approximation because there is some dependence among the held-out observations, within each of the five repetitions for example.



**Webtable 3b: Error in WAZ predictions of held-out data for different models. See Methods for details of the models.**

|                                                                                                    | No. of held-out observations | Median absolute error |                      |                    | Median relative error |                      |                    |      |      |
|----------------------------------------------------------------------------------------------------|------------------------------|-----------------------|----------------------|--------------------|-----------------------|----------------------|--------------------|------|------|
|                                                                                                    |                              | Main model            | Separate models (p*) | No covariates (p*) | Main model            | Separate models (p*) | No covariates (p*) |      |      |
| <b>Test 1: Holding out all studies from 10% of countries</b>                                       |                              |                       |                      |                    |                       |                      |                    |      |      |
| mean WAZ                                                                                           | 211                          | 0.17                  | 0.17                 | 0.22               | 0.19                  | 0.19                 | 0.71               | 0.28 | 0.00 |
| % WAZ < -2                                                                                         | 308                          | 3.24                  | 3.43                 | 0.09               | 0.23                  | 0.21                 | 0.04               | 0.28 | 0.00 |
| % WAZ < -3                                                                                         | 235                          | 1.39                  | 1.30                 | 0.20               | 0.33                  | 0.32                 | 0.22               | 0.41 | 0.00 |
| <b>Test 2: Holding out data based on a mixed pattern of missingness as described in Appendix 5</b> |                              |                       |                      |                    |                       |                      |                    |      |      |
| <b>All held-out observations</b>                                                                   |                              |                       |                      |                    |                       |                      |                    |      |      |
| mean WAZ                                                                                           | 259                          | 0.10                  | 0.12                 | 0.00               | 0.15                  | 0.17                 | 0.00               | 0.17 | 0.05 |
| % WAZ < -2                                                                                         | 246                          | 2.00                  | 2.05                 | 0.97               | 0.17                  | 0.16                 | 0.78               | 0.20 | 0.00 |
| % WAZ < -3                                                                                         | 296                          | 1.08                  | 1.04                 | 0.43               | 0.29                  | 0.30                 | 0.08               | 0.31 | 0.13 |
| <b>Hold-out algorithm</b>                                                                          |                              |                       |                      |                    |                       |                      |                    |      |      |
| All of the country's studies                                                                       |                              |                       |                      |                    |                       |                      |                    |      |      |
| mean WAZ                                                                                           | 26                           | 0.12                  | 0.12                 | 0.71               | 0.16                  | 0.24                 | 0.33               | 0.41 | 0.04 |
| % WAZ < -2                                                                                         | 45                           | 2.57                  | 3.08                 | 0.20               | 0.20                  | 0.19                 | 0.35               | 0.40 | 0.00 |
| % WAZ < -3                                                                                         | 27                           | 1.13                  | 1.09                 | 0.71               | 0.30                  | 0.34                 | 0.65               | 0.50 | 0.23 |
| All of the country's 2000-2011 studies                                                             |                              |                       |                      |                    |                       |                      |                    |      |      |
| mean WAZ                                                                                           | 65                           | 0.09                  | 0.11                 | 0.31               | 0.25                  | 0.24                 | 0.35               | 0.31 | 0.02 |
| % WAZ < -2                                                                                         | 69                           | 1.60                  | 1.53                 | 0.39               | 0.22                  | 0.21                 | 0.44               | 0.26 | 0.07 |
| % WAZ < -3                                                                                         | 67                           | 0.62                  | 0.56                 | 0.73               | 0.34                  | 0.34                 | 0.16               | 0.41 | 0.06 |
| A random 1/3 of the country's studies                                                              |                              |                       |                      |                    |                       |                      |                    |      |      |
| mean WAZ                                                                                           | 82                           | 0.11                  | 0.11                 | 0.36               | 0.13                  | 0.14                 | 0.28               | 0.15 | 0.75 |
| % WAZ < -2                                                                                         | 132                          | 2.05                  | 2.08                 | 0.85               | 0.13                  | 0.13                 | 0.69               | 0.12 | 0.33 |
| % WAZ < -3                                                                                         | 101                          | 1.22                  | 1.08                 | 0.05               | 0.30                  | 0.29                 | 0.50               | 0.28 | 0.92 |
| Held-out mean and % < -3 when % < -2 is known                                                      |                              |                       |                      |                    |                       |                      |                    |      |      |
| mean WAZ                                                                                           | 86                           | 0.10                  | 0.12                 | 0.00               | 0.13                  | 0.17                 | 0.00               | 0.14 | 0.99 |
| % WAZ < -3                                                                                         | 101                          | 1.03                  | 1.33                 | 0.01               | 0.25                  | 0.27                 | 0.01               | 0.25 | 0.56 |

\* p-values for model error comparisons were calculated using the non-parametric Wilcoxon signed-rank test for paired data. The p-values are calculated assuming independence of the held-out observations. They should therefore be interpreted as an approximation because there is some dependence among the held-out observations, within each of the five repetitions for example.

**Webtable 4a: Coverage of held-out data by the uncertainty intervals of model predictions in Test 1.**

|                                                                       | <u>HAZ</u>                   |                 | <u>WAZ</u>                   |                 |
|-----------------------------------------------------------------------|------------------------------|-----------------|------------------------------|-----------------|
|                                                                       | No. of held-out observations | Percent covered | No. of held-out observations | Percent covered |
| <b><u>All held-out observations</u></b>                               |                              |                 |                              |                 |
| mean Z                                                                | 181                          | 94              | 211                          | 96              |
| % Z < -2                                                              | 292                          | 92              | 308                          | 95              |
| % Z < -3                                                              | 202                          | 95              | 235                          | 98              |
| <b><u>Year</u></b>                                                    |                              |                 |                              |                 |
| 1985-1999                                                             |                              |                 |                              |                 |
| mean Z                                                                | 71                           | 94              | 88                           | 94              |
| % Z < -2                                                              | 150                          | 95              | 162                          | 94              |
| % Z < -3                                                              | 82                           | 95              | 101                          | 99              |
| 2000-2011                                                             |                              |                 |                              |                 |
| mean Z                                                                | 110                          | 94              | 123                          | 97              |
| % Z < -2                                                              | 142                          | 88              | 146                          | 96              |
| % Z < -3                                                              | 120                          | 94              | 134                          | 98              |
| <b><u>Country-level data density</u></b>                              |                              |                 |                              |                 |
| Data poor (three or fewer years with data)                            |                              |                 |                              |                 |
| mean Z                                                                | 28                           | 100             | 35                           | 97              |
| % Z < -2                                                              | 50                           | 88              | 56                           | 95              |
| % Z < -3                                                              | 28                           | 96              | 38                           | 100             |
| Data rich (six or more years with data, with at least one after 1999) |                              |                 |                              |                 |
| mean Z                                                                | 98                           | 89              | 100                          | 97              |
| % Z < -2                                                              | 158                          | 92              | 147                          | 97              |
| % Z < -3                                                              | 115                          | 93              | 115                          | 100             |
| Average data density (all remaining countries)                        |                              |                 |                              |                 |
| mean Z                                                                | 55                           | 100             | 76                           | 93              |
| % Z < -2                                                              | 84                           | 94              | 105                          | 92              |
| % Z < -3                                                              | 59                           | 97              | 82                           | 95              |

(continued)

**Webtable 4a (continued): Coverage of held-out data by the uncertainty intervals of model predictions in Test 1.**

|                                                | <u>HAZ</u>                   |                 | <u>WAZ</u>                   |                 |
|------------------------------------------------|------------------------------|-----------------|------------------------------|-----------------|
|                                                | No. of held-out observations | Percent covered | No. of held-out observations | Percent covered |
| <b>Region</b>                                  |                              |                 |                              |                 |
| Sub-Saharan Africa                             |                              |                 |                              |                 |
| mean Z                                         | 69                           | 99              | 72                           | 100             |
| % Z < -2                                       | 107                          | 98              | 103                          | 99              |
| % Z < -3                                       | 79                           | 97              | 82                           | 99              |
| Central Asia, Middle East, and North Africa    |                              |                 |                              |                 |
| mean Z                                         | 40                           | 100             | 39                           | 90              |
| % Z < -2                                       | 70                           | 97              | 64                           | 92              |
| % Z < -3                                       | 48                           | 98              | 48                           | 100             |
| South Asia                                     |                              |                 |                              |                 |
| mean Z                                         | 12                           | 100             | 14                           | 71              |
| % Z < -2                                       | 17                           | 100             | 24                           | 71              |
| % Z < -3                                       | 13                           | 92              | 17                           | 88              |
| East and Southeast Asia                        |                              |                 |                              |                 |
| mean Z                                         | 28                           | 100             | 43                           | 100             |
| % Z < -2                                       | 46                           | 100             | 60                           | 98              |
| % Z < -3                                       | 30                           | 97              | 44                           | 98              |
| Southern and Tropical Latin America            |                              |                 |                              |                 |
| mean Z                                         | 2                            | 100             | 2                            | 50              |
| % Z < -2                                       | 6                            | 33              | 2                            | 50              |
| % Z < -3                                       | 1                            | 100             | 1                            | 100             |
| Andean and Central Latin America and Caribbean |                              |                 |                              |                 |
| mean Z                                         | 29                           | 66              | 39                           | 100             |
| % Z < -2                                       | 41                           | 63              | 51                           | 98              |
| % Z < -3                                       | 30                           | 80              | 41                           | 100             |
| Oceania                                        |                              |                 |                              |                 |
| mean Z                                         | 1                            | 100             | 2                            | 100             |
| % Z < -2                                       | 5                            | 80              | 4                            | 100             |
| % Z < -3                                       | 1                            | 100             | 2                            | 100             |

**Webtable 4b: Coverage of held-out data by the uncertainty intervals of model predictions in Test 2.**

|                                                                       | <u>HAZ</u>                   |                 | <u>WAZ</u>                   |                 |
|-----------------------------------------------------------------------|------------------------------|-----------------|------------------------------|-----------------|
|                                                                       | No. of held-out observations | Percent covered | No. of held-out observations | Percent covered |
| <b>All held-out observations</b>                                      |                              |                 |                              |                 |
| mean Z                                                                | 250                          | 96              | 259                          | 98              |
| % Z < -2                                                              | 244                          | 90              | 246                          | 96              |
| % Z < -3                                                              | 298                          | 95              | 296                          | 97              |
| <b>Hold-out algorithm</b>                                             |                              |                 |                              |                 |
| All of the country's studies                                          |                              |                 |                              |                 |
| mean Z                                                                | 17                           | 88              | 26                           | 100             |
| % Z < -2                                                              | 41                           | 73              | 45                           | 93              |
| % Z < -3                                                              | 23                           | 91              | 27                           | 96              |
| All of the country's 2000-2011 studies                                |                              |                 |                              |                 |
| mean Z                                                                | 51                           | 94              | 65                           | 100             |
| % Z < -2                                                              | 56                           | 91              | 69                           | 97              |
| % Z < -3                                                              | 53                           | 92              | 67                           | 100             |
| A random 1/3 of the country's studies                                 |                              |                 |                              |                 |
| mean Z                                                                | 99                           | 97              | 82                           | 98              |
| % Z < -2                                                              | 147                          | 94              | 132                          | 97              |
| % Z < -3                                                              | 111                          | 97              | 101                          | 94              |
| Held-out mean and % < -3 when % < -2 is known                         |                              |                 |                              |                 |
| mean Z                                                                | 83                           | 98              | 86                           | 98              |
| % Z < -3                                                              | 111                          | 95              | 101                          | 99              |
| <b>Year</b>                                                           |                              |                 |                              |                 |
| 1985-1999                                                             |                              |                 |                              |                 |
| mean Z                                                                | 89                           | 98              | 90                           | 96              |
| % Z < -2                                                              | 84                           | 86              | 78                           | 96              |
| % Z < -3                                                              | 105                          | 91              | 103                          | 94              |
| 2000-2011                                                             |                              |                 |                              |                 |
| mean Z                                                                | 161                          | 95              | 169                          | 100             |
| % Z < -2                                                              | 160                          | 92              | 168                          | 96              |
| % Z < -3                                                              | 193                          | 97              | 193                          | 99              |
| <b>Country-level data density</b>                                     |                              |                 |                              |                 |
| Data poor (three or fewer years with data)                            |                              |                 |                              |                 |
| mean Z                                                                | 42                           | 98              | 39                           | 100             |
| % Z < -2                                                              | 56                           | 80              | 53                           | 92              |
| % Z < -3                                                              | 52                           | 96              | 49                           | 98              |
| Data rich (six or more years with data, with at least one after 1999) |                              |                 |                              |                 |
| mean Z                                                                | 131                          | 95              | 145                          | 99              |
| % Z < -2                                                              | 118                          | 92              | 122                          | 98              |
| % Z < -3                                                              | 157                          | 95              | 162                          | 99              |
| Average data density (all remaining countries)                        |                              |                 |                              |                 |
| mean Z                                                                | 77                           | 96              | 75                           | 97              |
| % Z < -2                                                              | 70                           | 94              | 71                           | 96              |
| % Z < -3                                                              | 89                           | 94              | 85                           | 94              |

(continued)

**Webtable 4b (continued): Coverage of held-out data by the uncertainty intervals of model predictions in Test 2.**

|                                                | <b>HAZ</b>                   |                 | <b>WAZ</b>                   |                 |
|------------------------------------------------|------------------------------|-----------------|------------------------------|-----------------|
|                                                | No. of held-out observations | Percent covered | No. of held-out observations | Percent covered |
| <b>Region</b>                                  |                              |                 |                              |                 |
| Sub-Saharan Africa                             |                              |                 |                              |                 |
| mean Z                                         | 69                           | 99              | 68                           | 99              |
| % Z < -2                                       | 87                           | 94              | 78                           | 97              |
| % Z < -3                                       | 87                           | 97              | 83                           | 98              |
| Central Asia, Middle East, and North Africa    |                              |                 |                              |                 |
| mean Z                                         | 53                           | 98              | 55                           | 98              |
| % Z < -2                                       | 44                           | 95              | 56                           | 95              |
| % Z < -3                                       | 64                           | 98              | 66                           | 95              |
| South Asia                                     |                              |                 |                              |                 |
| mean Z                                         | 18                           | 100             | 19                           | 100             |
| % Z < -2                                       | 12                           | 100             | 16                           | 100             |
| % Z < -3                                       | 22                           | 100             | 22                           | 100             |
| East and Southeast Asia                        |                              |                 |                              |                 |
| mean Z                                         | 42                           | 93              | 50                           | 100             |
| % Z < -2                                       | 39                           | 82              | 37                           | 97              |
| % Z < -3                                       | 51                           | 88              | 52                           | 96              |
| Southern and Tropical Latin America            |                              |                 |                              |                 |
| mean Z                                         | 10                           | 90              | 11                           | 82              |
| % Z < -2                                       | 7                            | 100             | 5                            | 100             |
| % Z < -3                                       | 9                            | 78              | 9                            | 100             |
| Andean and Central Latin America and Caribbean |                              |                 |                              |                 |
| mean Z                                         | 56                           | 93              | 54                           | 100             |
| % Z < -2                                       | 47                           | 83              | 48                           | 96              |
| % Z < -3                                       | 62                           | 95              | 61                           | 98              |
| Oceania                                        |                              |                 |                              |                 |
| mean Z                                         | 2                            | 100             | 2                            | 100             |
| % Z < -2                                       | 8                            | 62              | 6                            | 83              |
| % Z < -3                                       | 3                            | 100             | 3                            | 100             |

**Webtable 5: Sensitivity of results to modelling choices.**

|            | <u>Median difference</u> |        |               | <u>Median absolute difference</u> |        |               |
|------------|--------------------------|--------|---------------|-----------------------------------|--------|---------------|
|            | 7-component              | No GDP | No covariates | 7-component                       | No GDP | No covariates |
| mean HAZ   | 0.00                     | -0.00  | -0.01         | 0.03                              | 0.02   | 0.02          |
| % HAZ < -2 | -0.13                    | 0.11   | 0.17          | 0.63                              | 0.35   | 0.60          |
| % HAZ < -3 | -0.19                    | 0.06   | 0.12          | 0.63                              | 0.22   | 0.50          |
| mean WAZ   | -0.01                    | -0.00  | -0.01         | 0.01                              | 0.01   | 0.02          |
| % WAZ < -2 | -0.04                    | 0.07   | 0.18          | 0.16                              | 0.17   | 0.49          |
| % WAZ < -3 | 0.00                     | 0.02   | 0.07          | 0.08                              | 0.07   | 0.27          |

**Webfigure 1: The relationship between summary HAZ and WAZ summary statistics when z-scores are calculated using the WHO standards vs. using the NCHS standards, by age group and sex. Each panel shows the survey data and the fitted regression model. Regression parameters (slope and intercept) and goodness-of-fit statistics are shown in each panel. Regression parameters are labeled “linear” when the regression was fitted without taking the logit of the independent and dependent variables. In all other cases, the logit of the prevalence was used. (See page 4.)**

Age range: 0-0.49 years ( $n = 145$ )

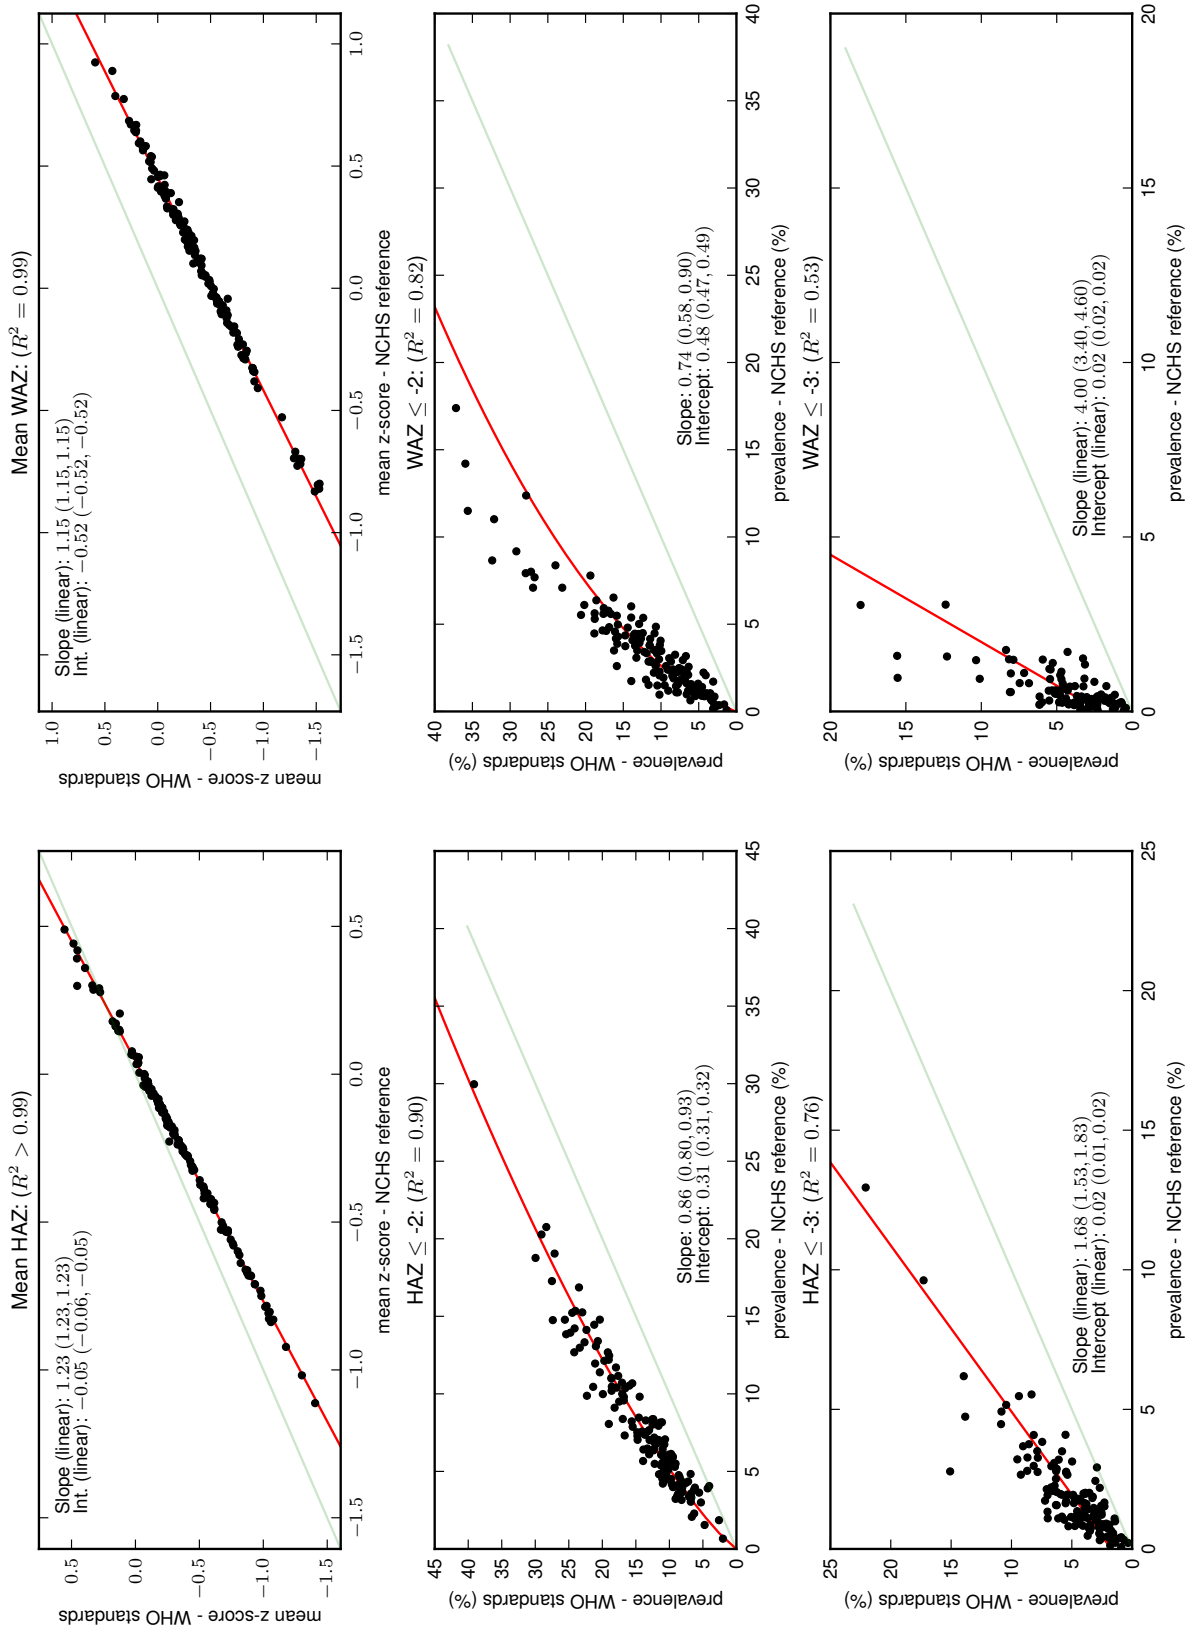



Age range: 0-0.99 years ( $n = 145$ )

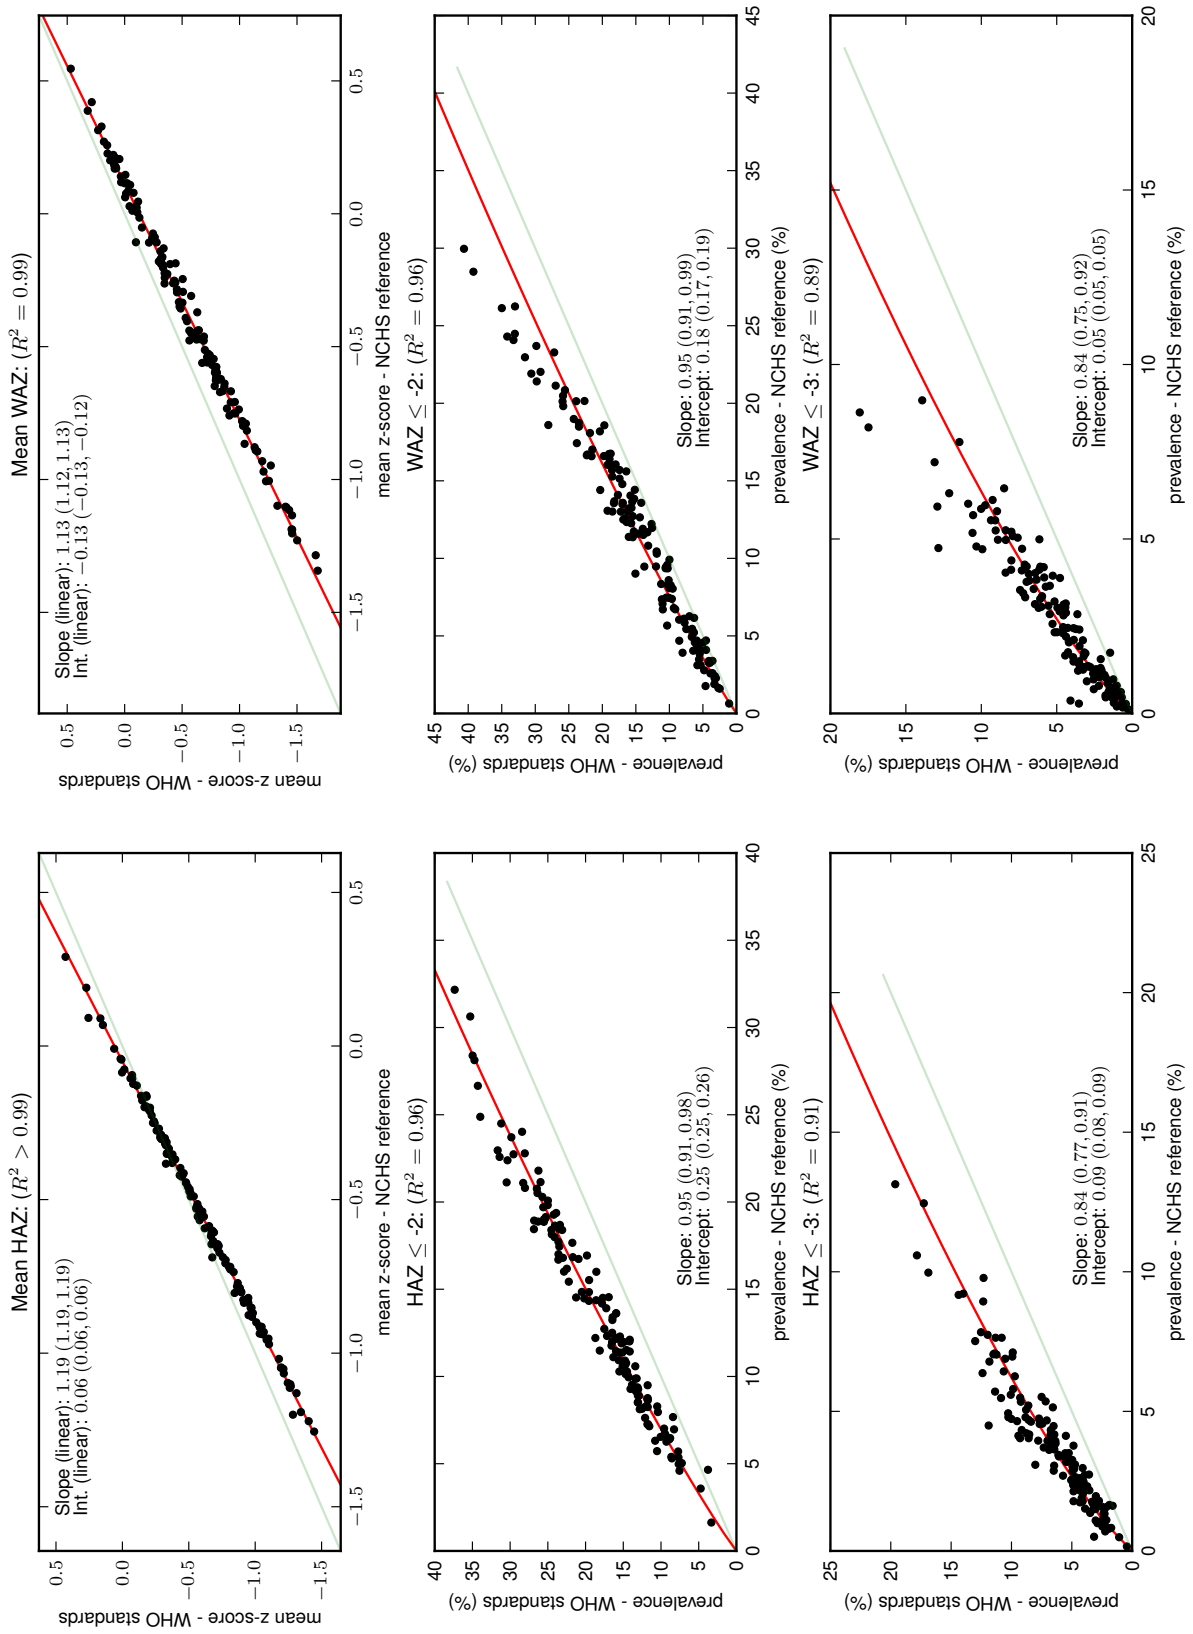

Age range: 0-1.99 years ( $n = 145$ )

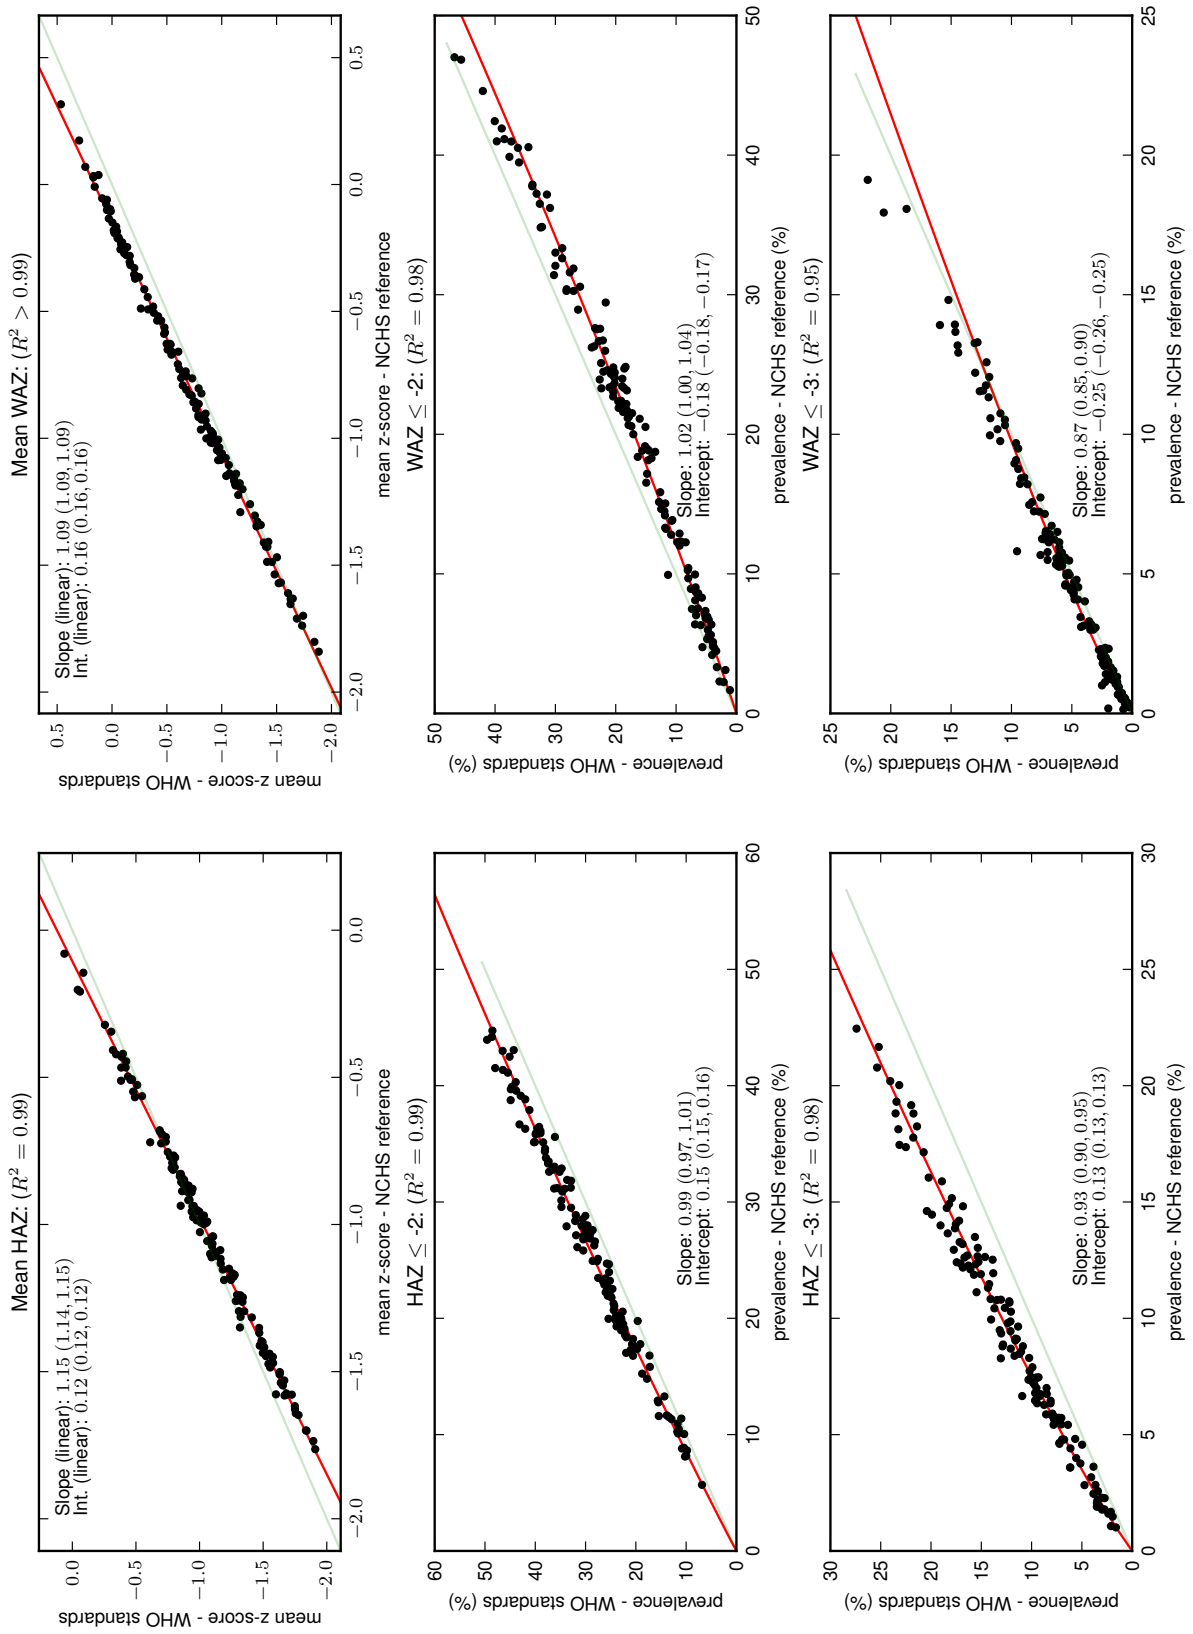

Age range: 0-2.99 years ( $n = 141$ )

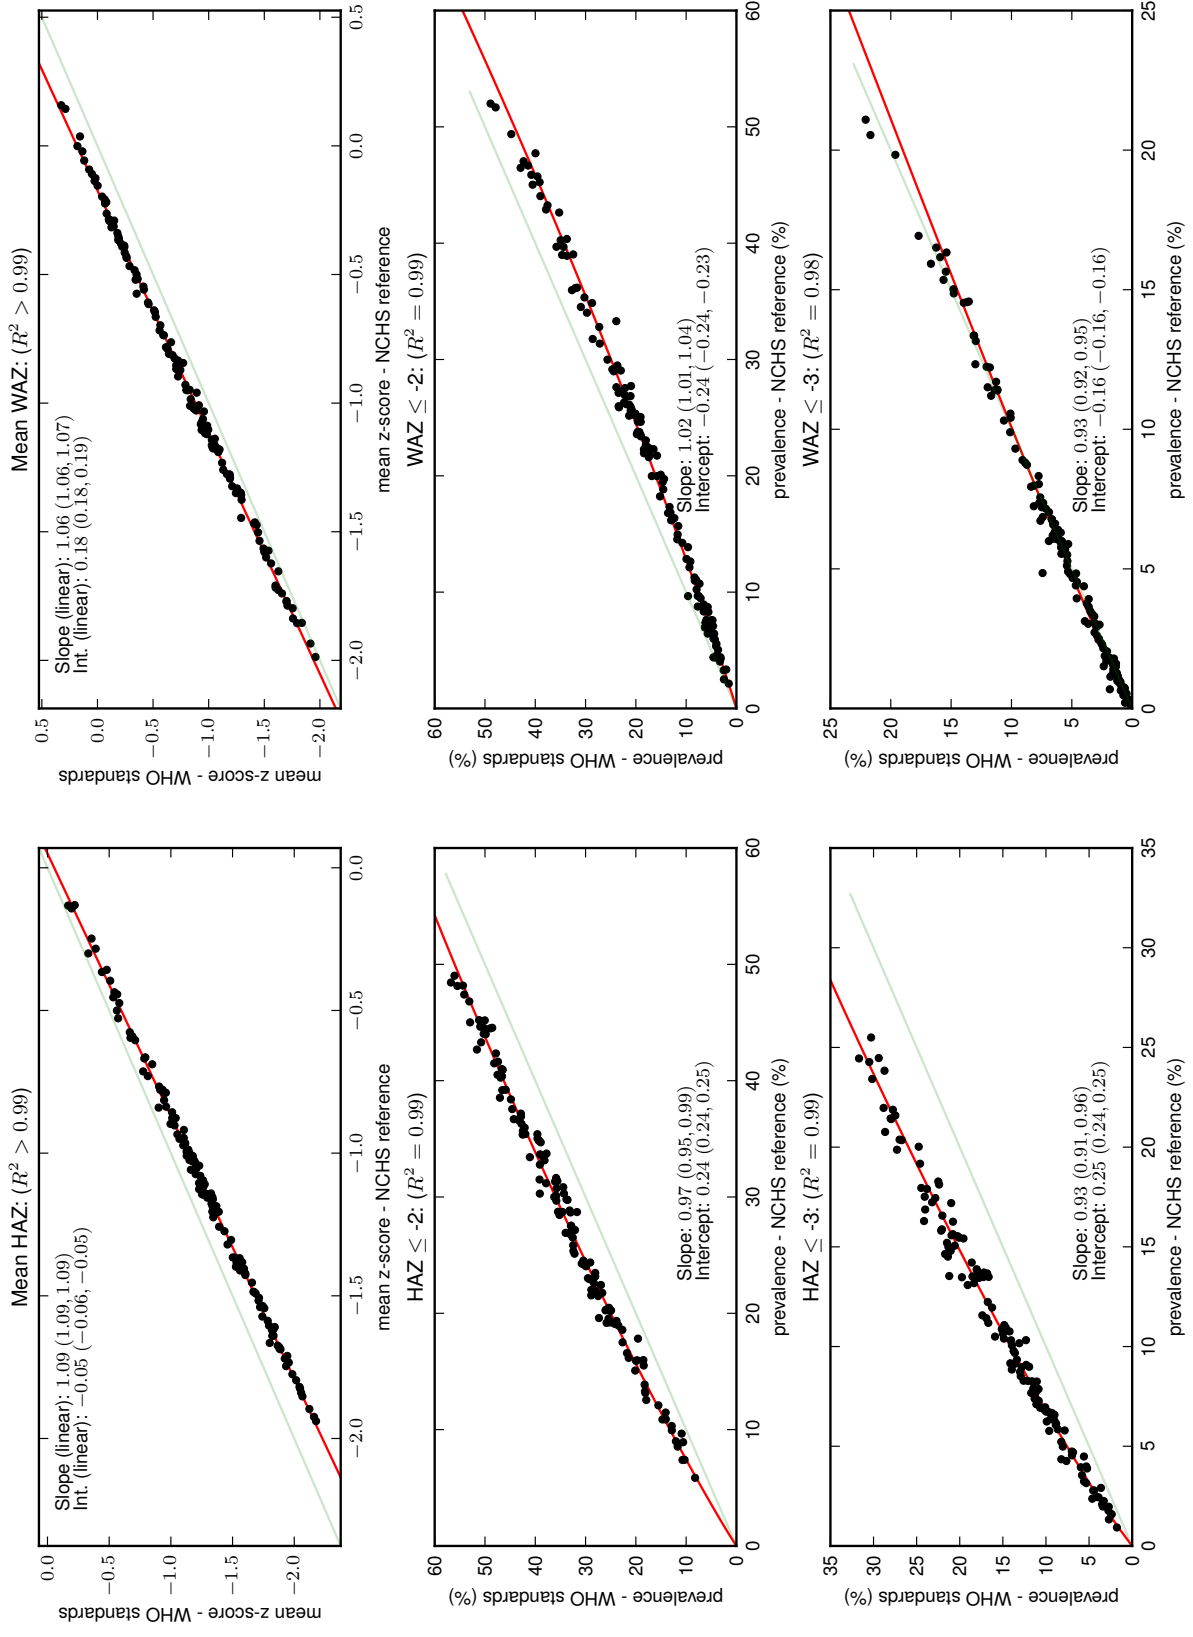

Age range: 0-4.99 years ( $n = 119$ )

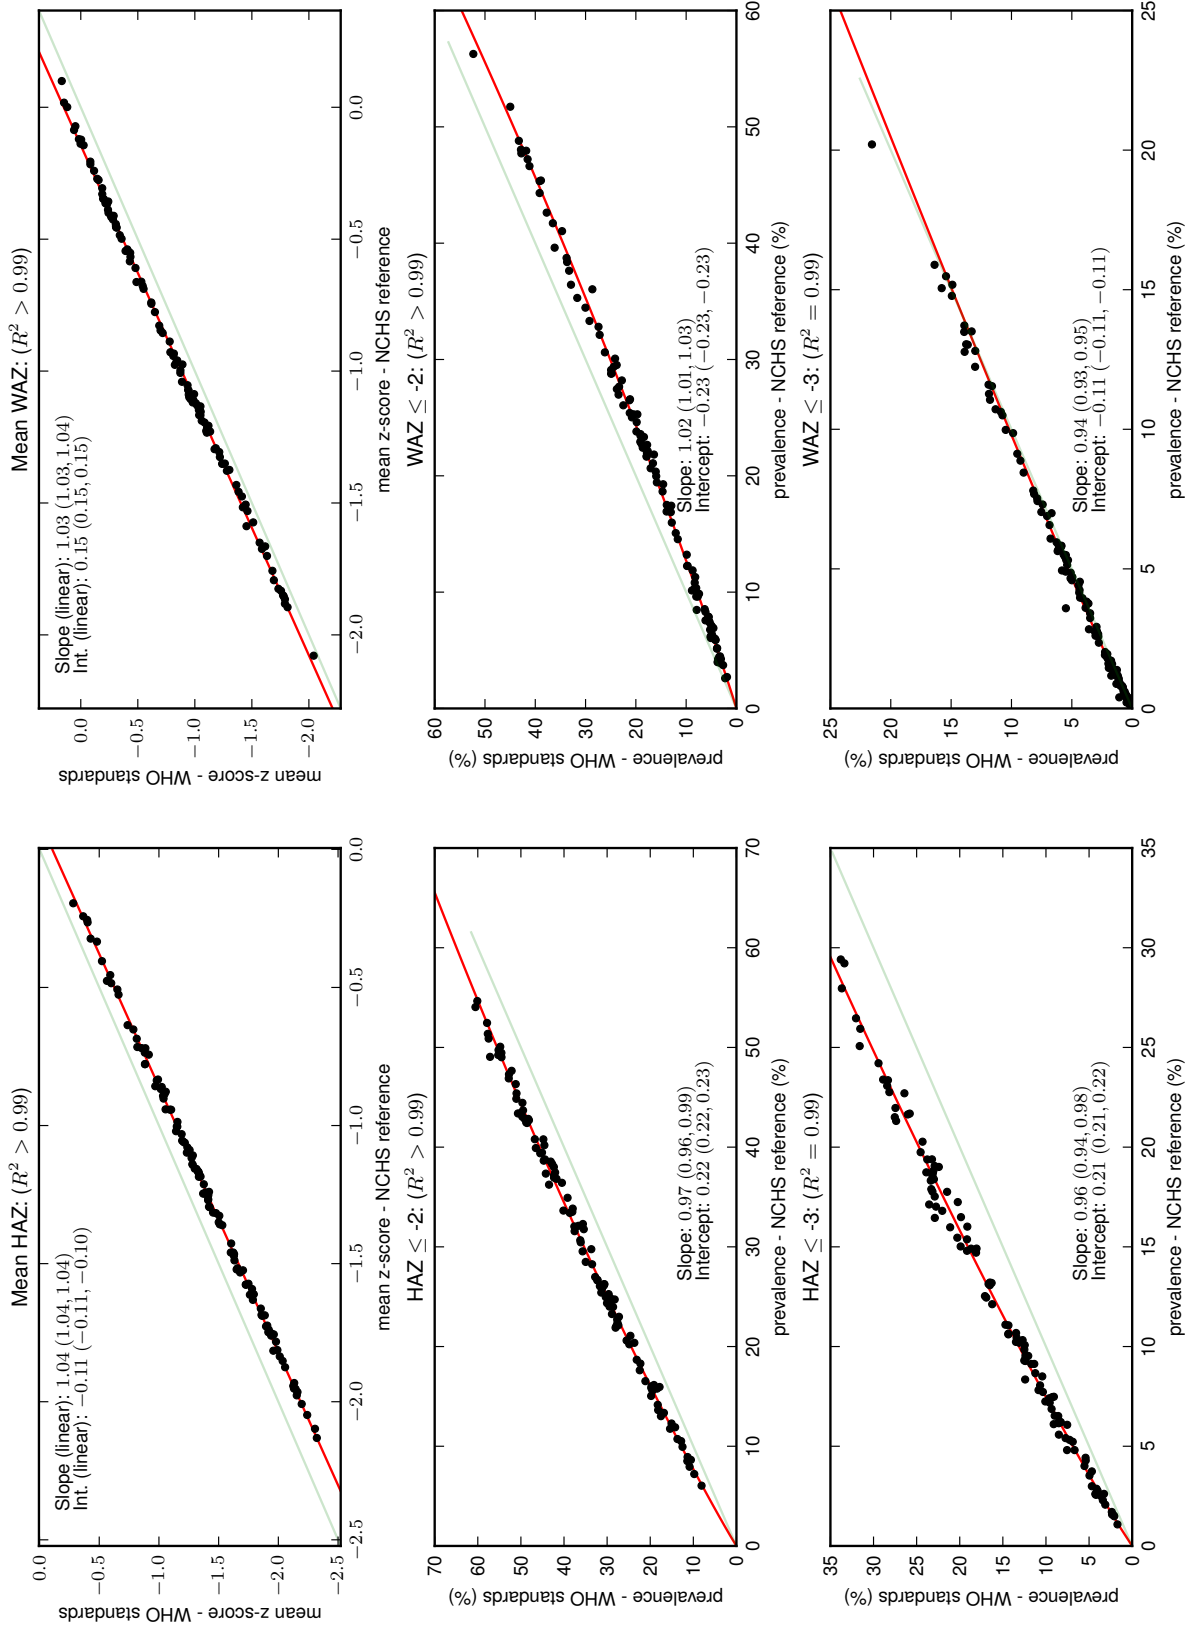

Age range: 0.08-1.50 years ( $n = 145$ )

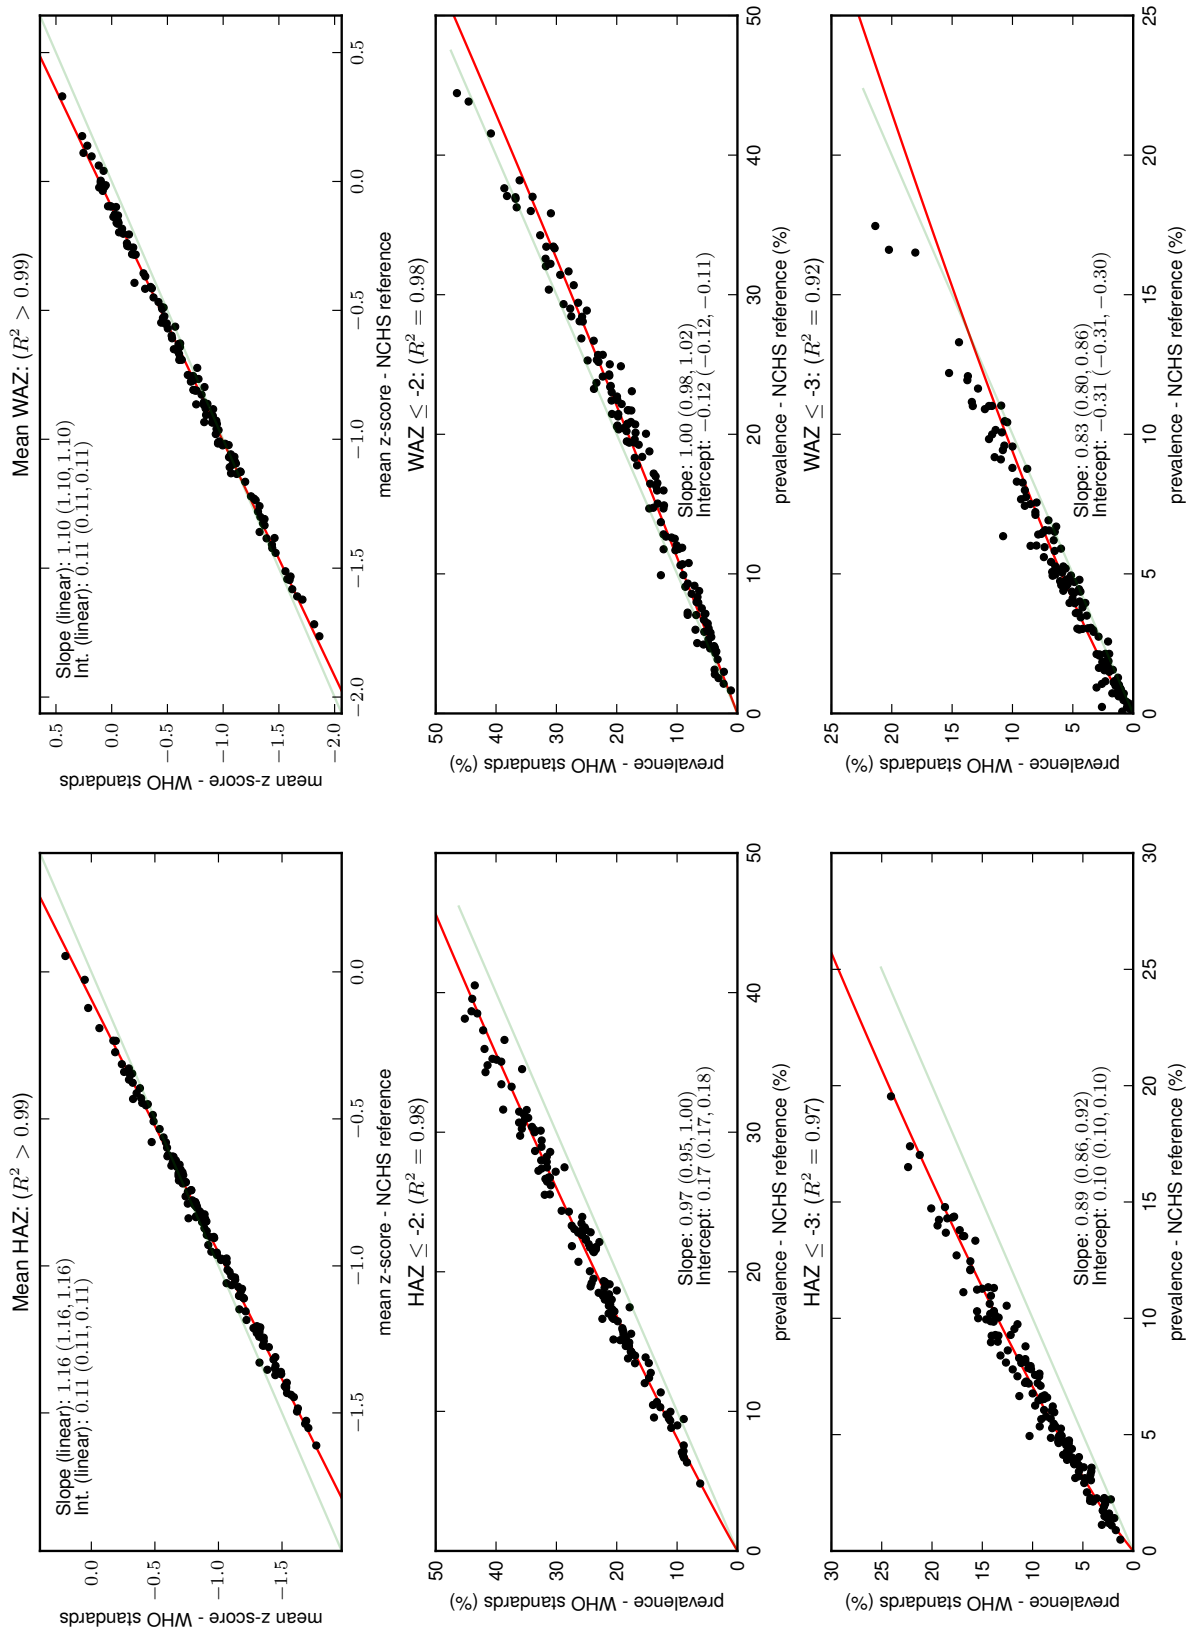

Age range: 0.25-4.99 years ( $n = 119$ )

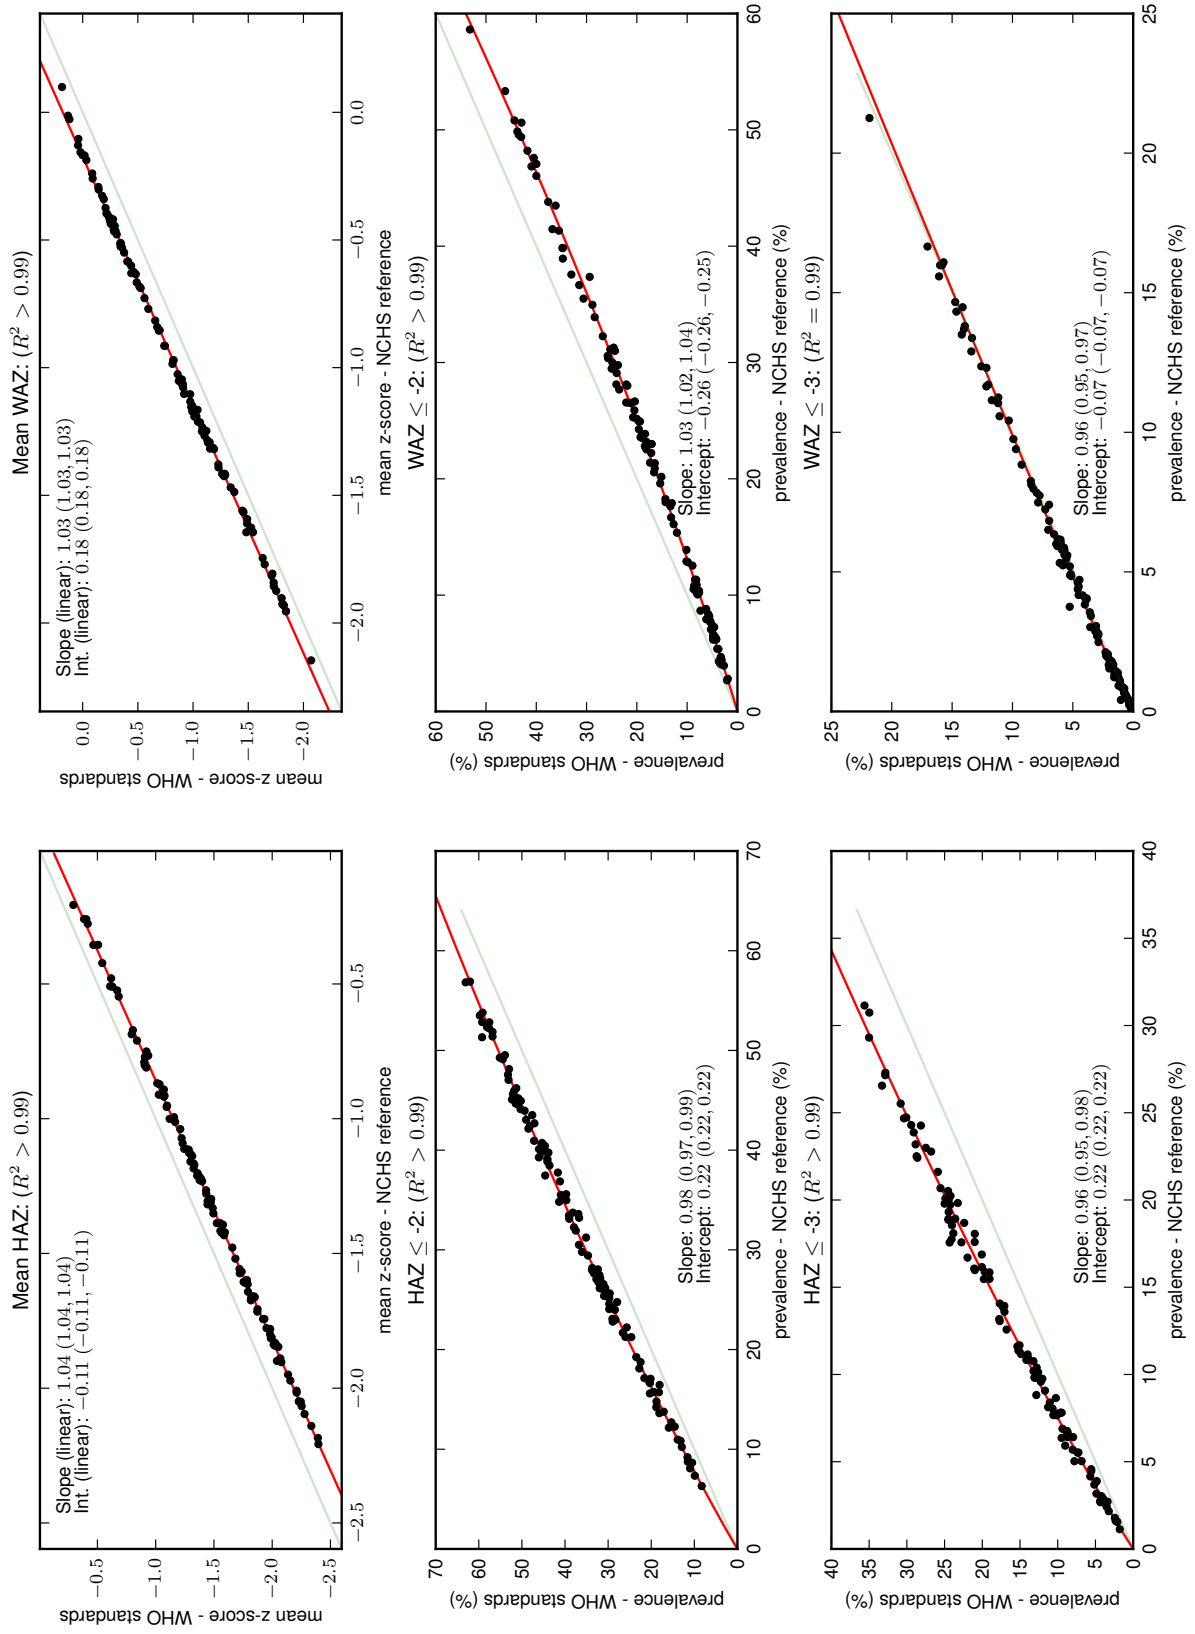

Age range: 0.50-0.99 years ( $n = 159$ )

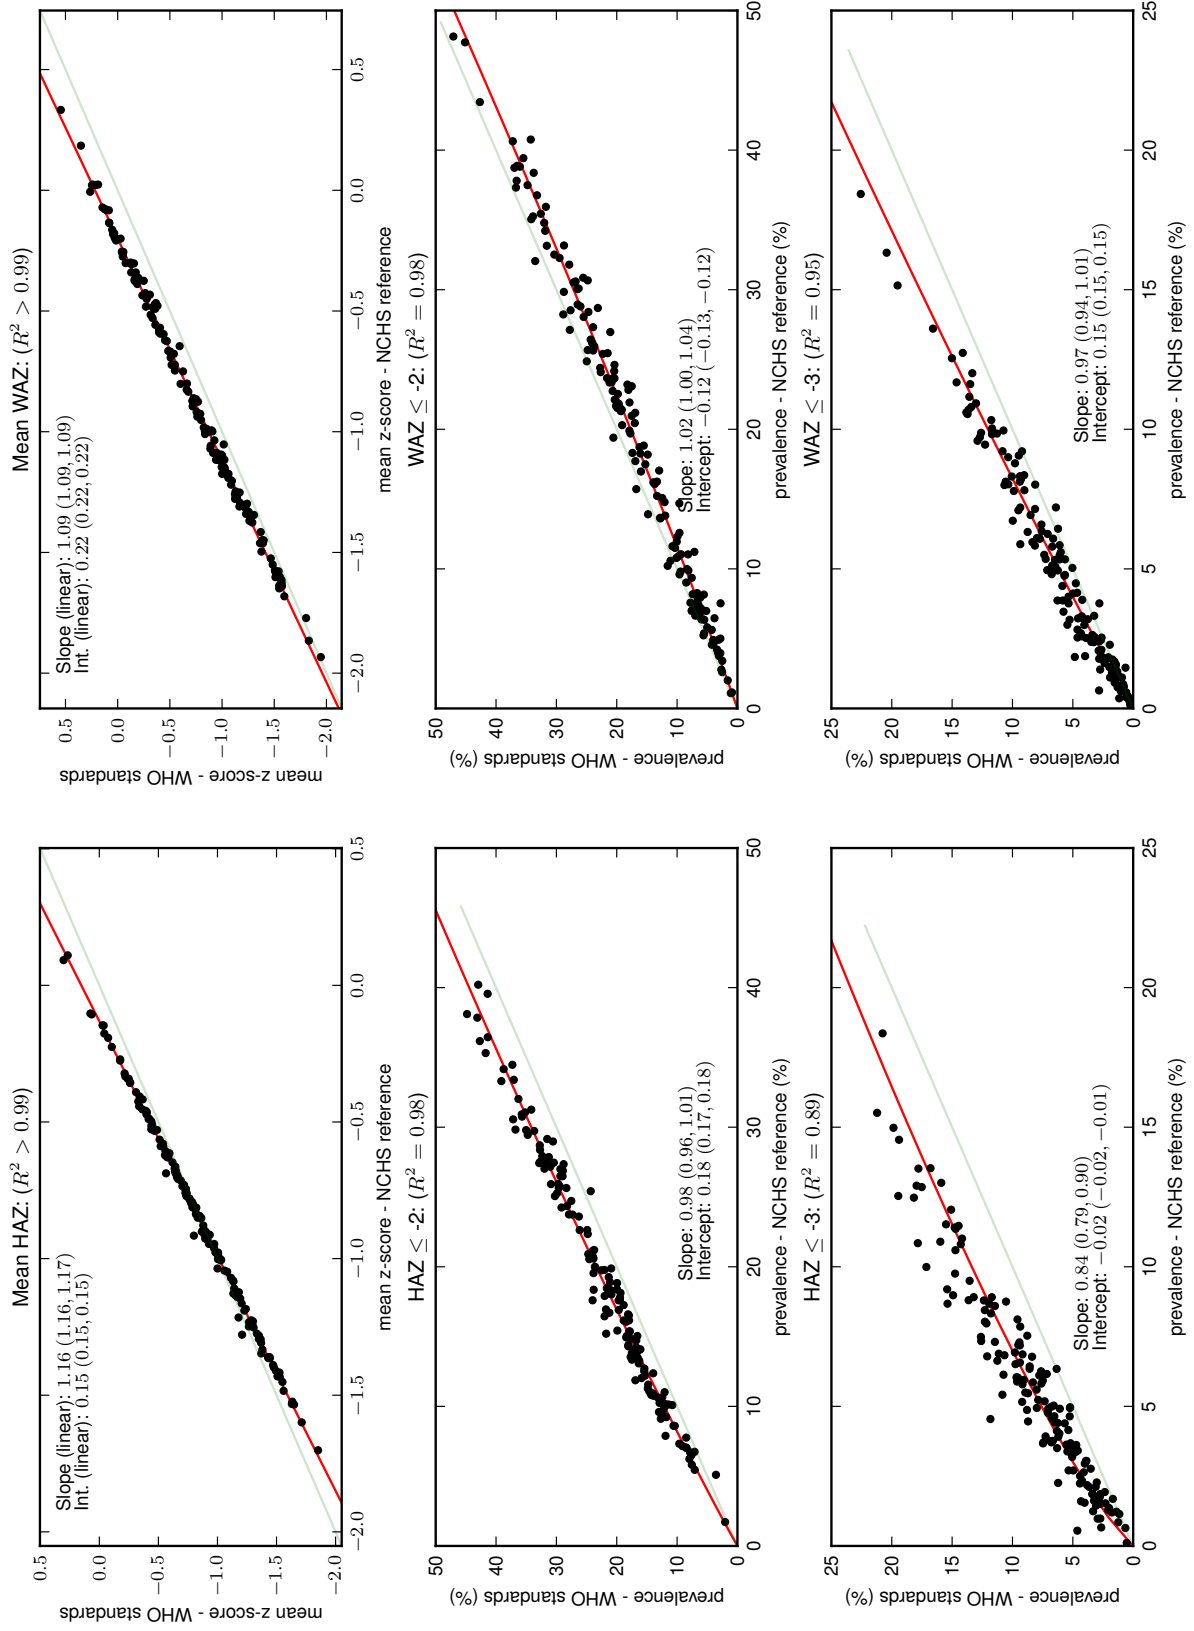

Age range: 0.50-1.49 years ( $n = 159$ )

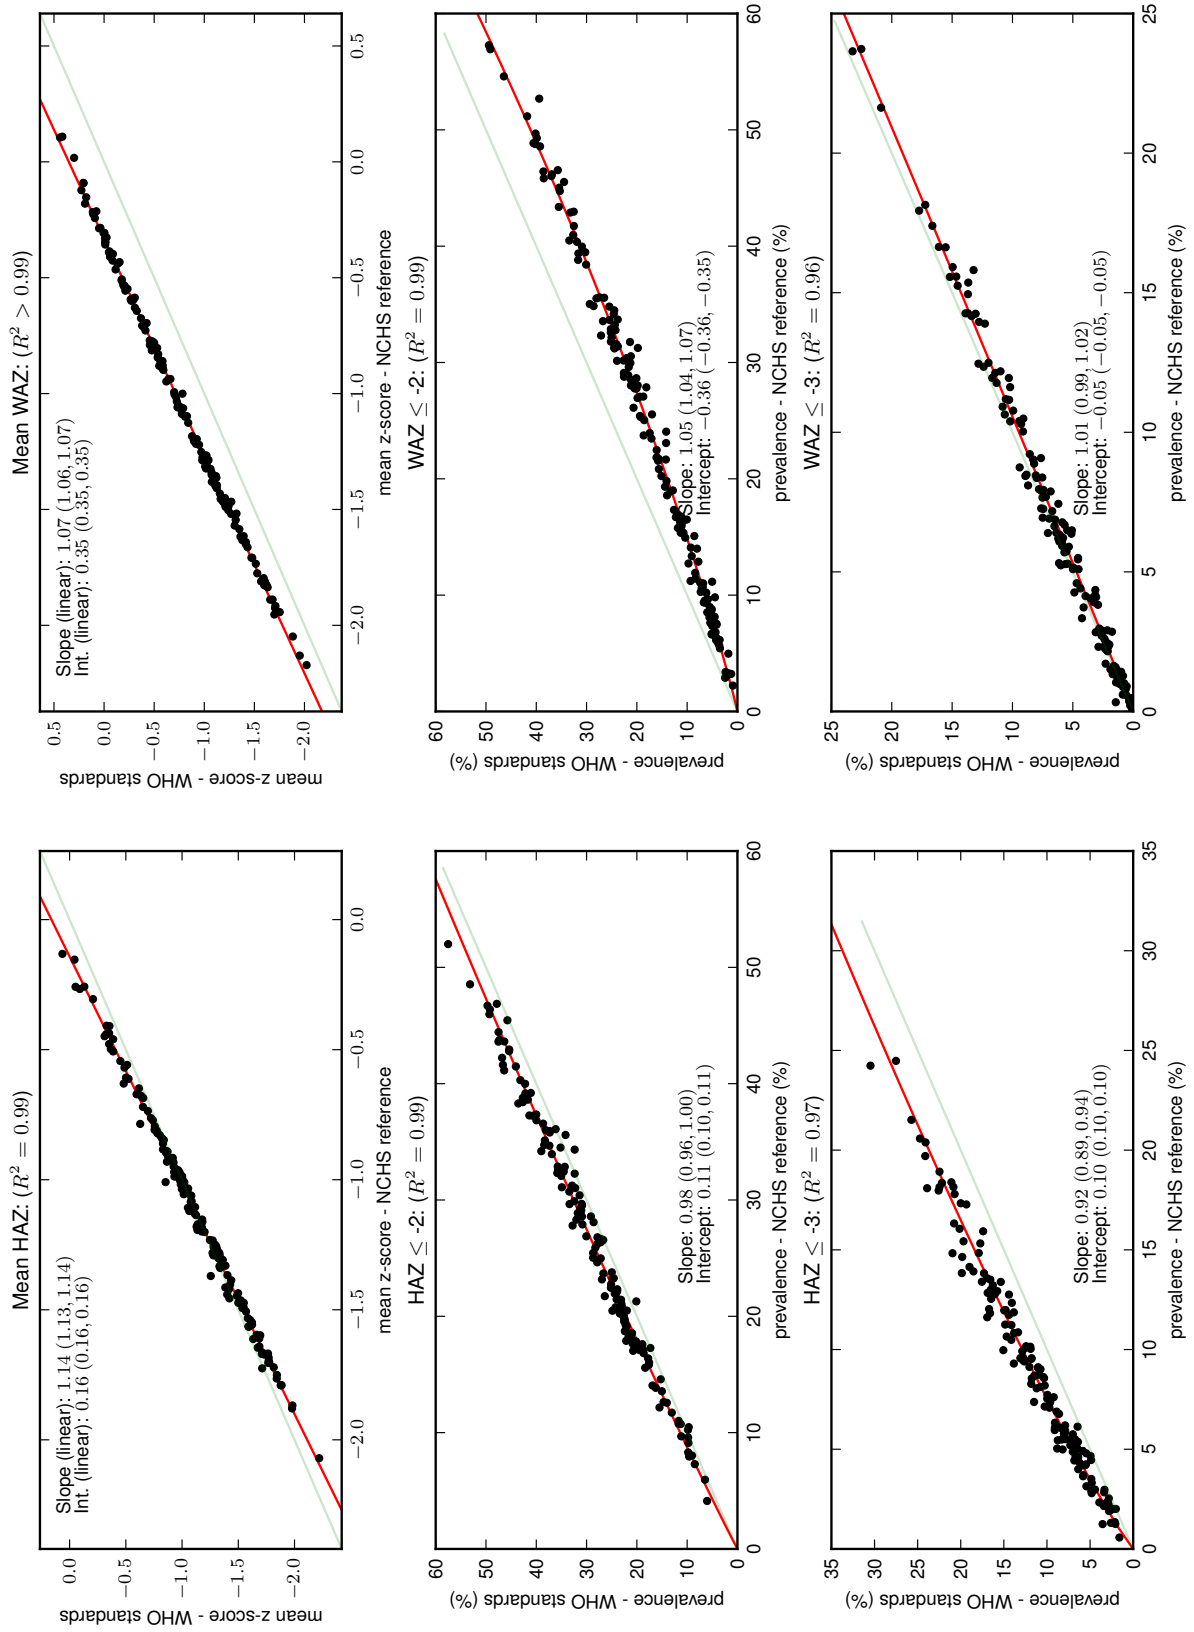



Age range: 0.50-1.99 years ( $n = 159$ )

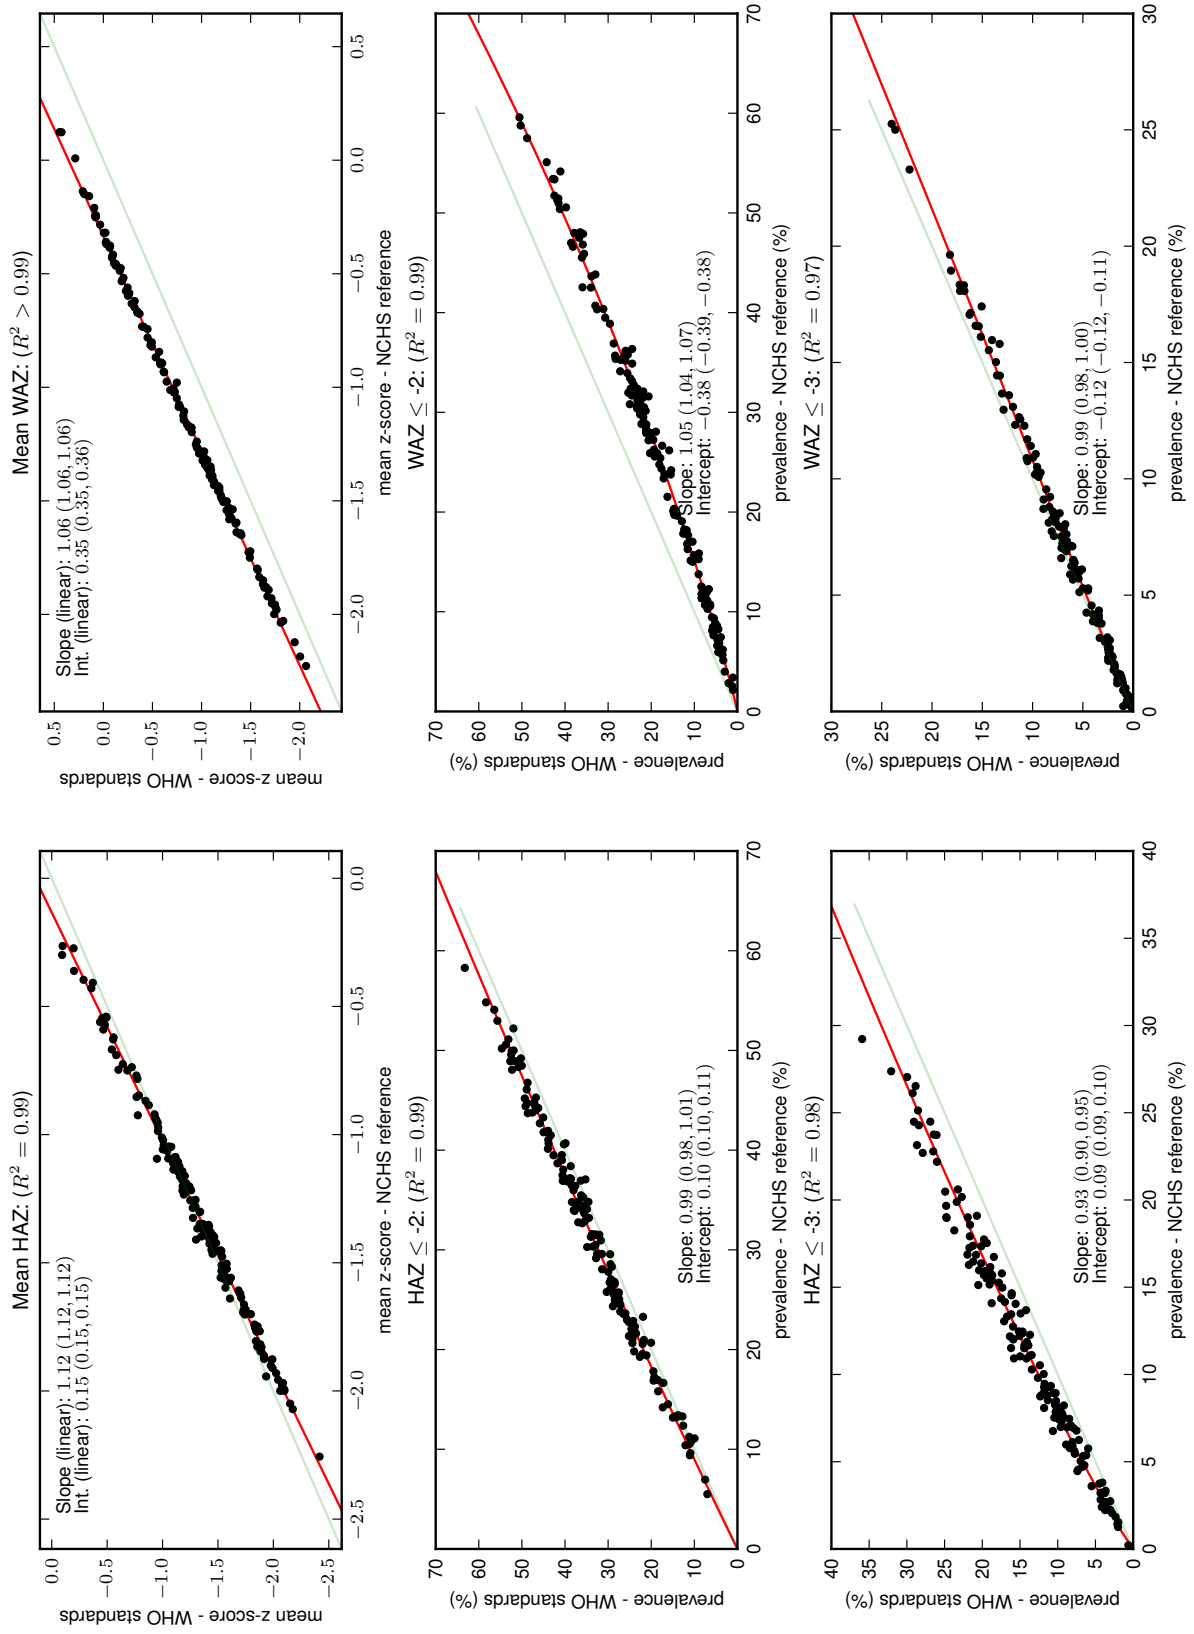

Age range: 0.50-2.99 years ( $n = 141$ )

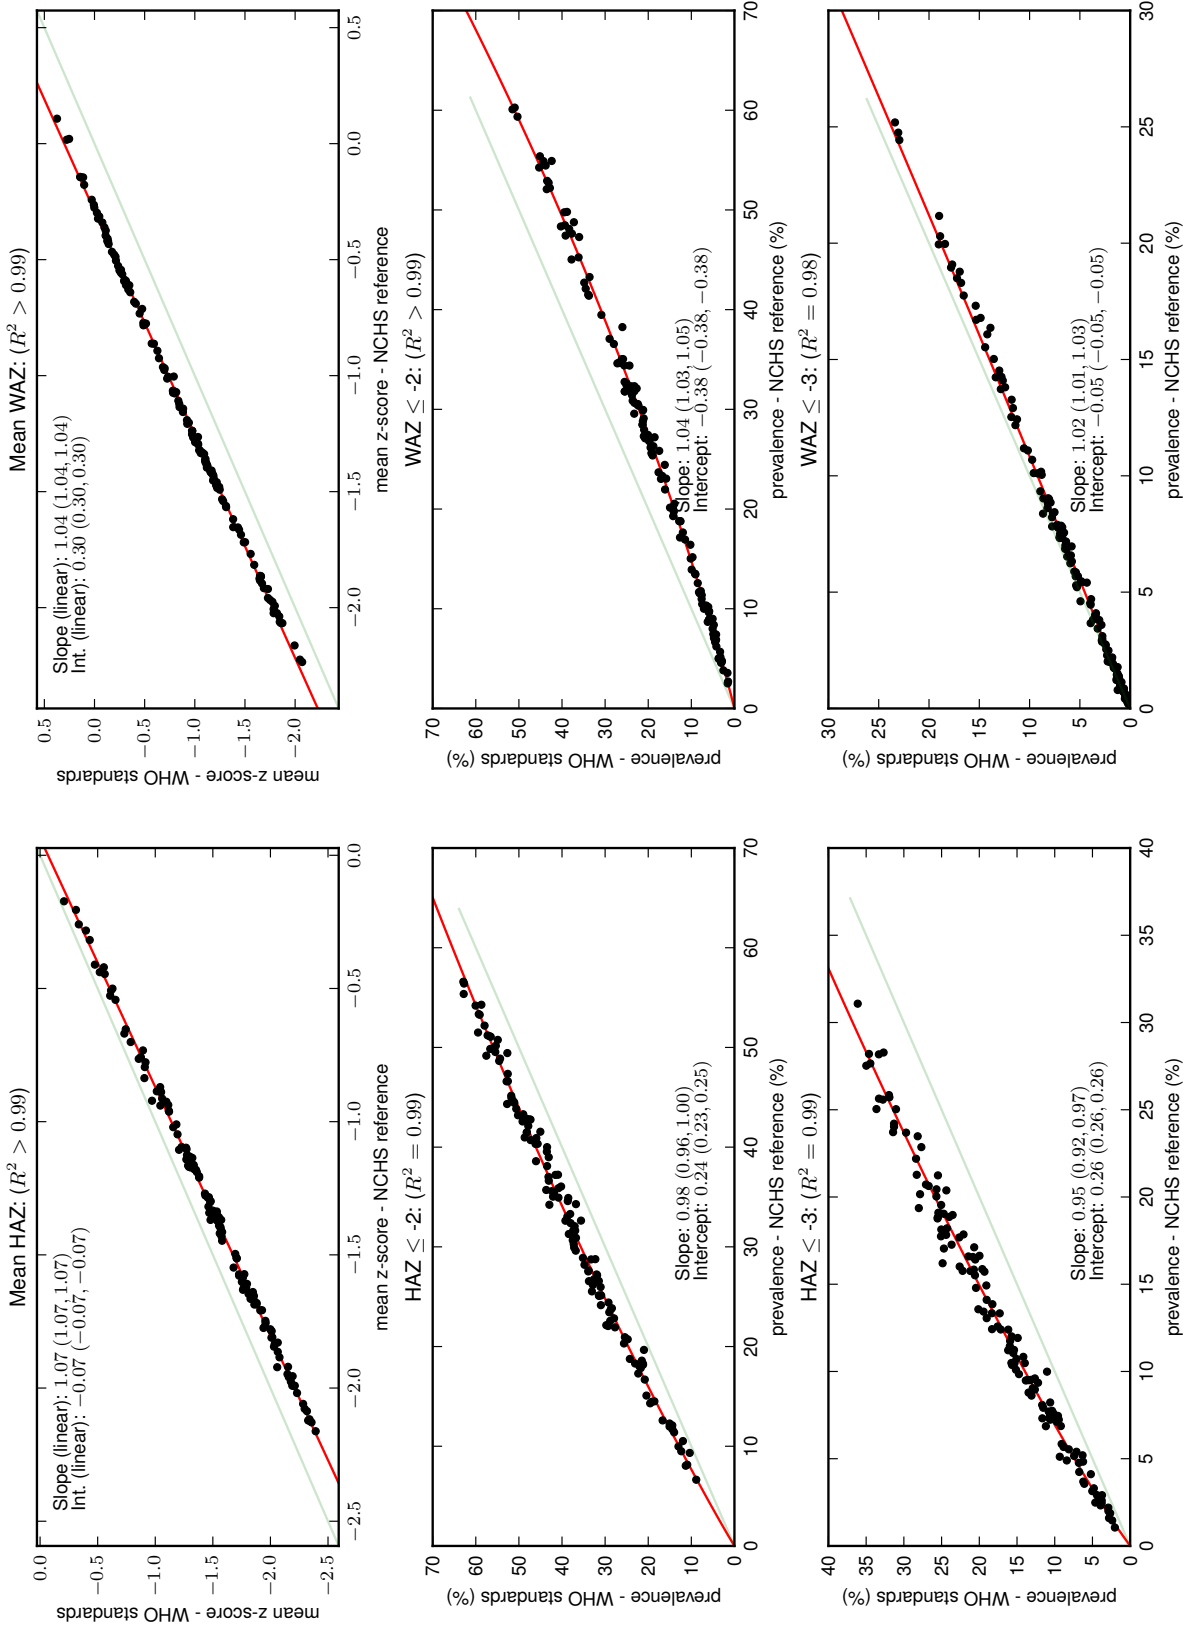

Age range: 0.50-4.99 years ( $n = 119$ )

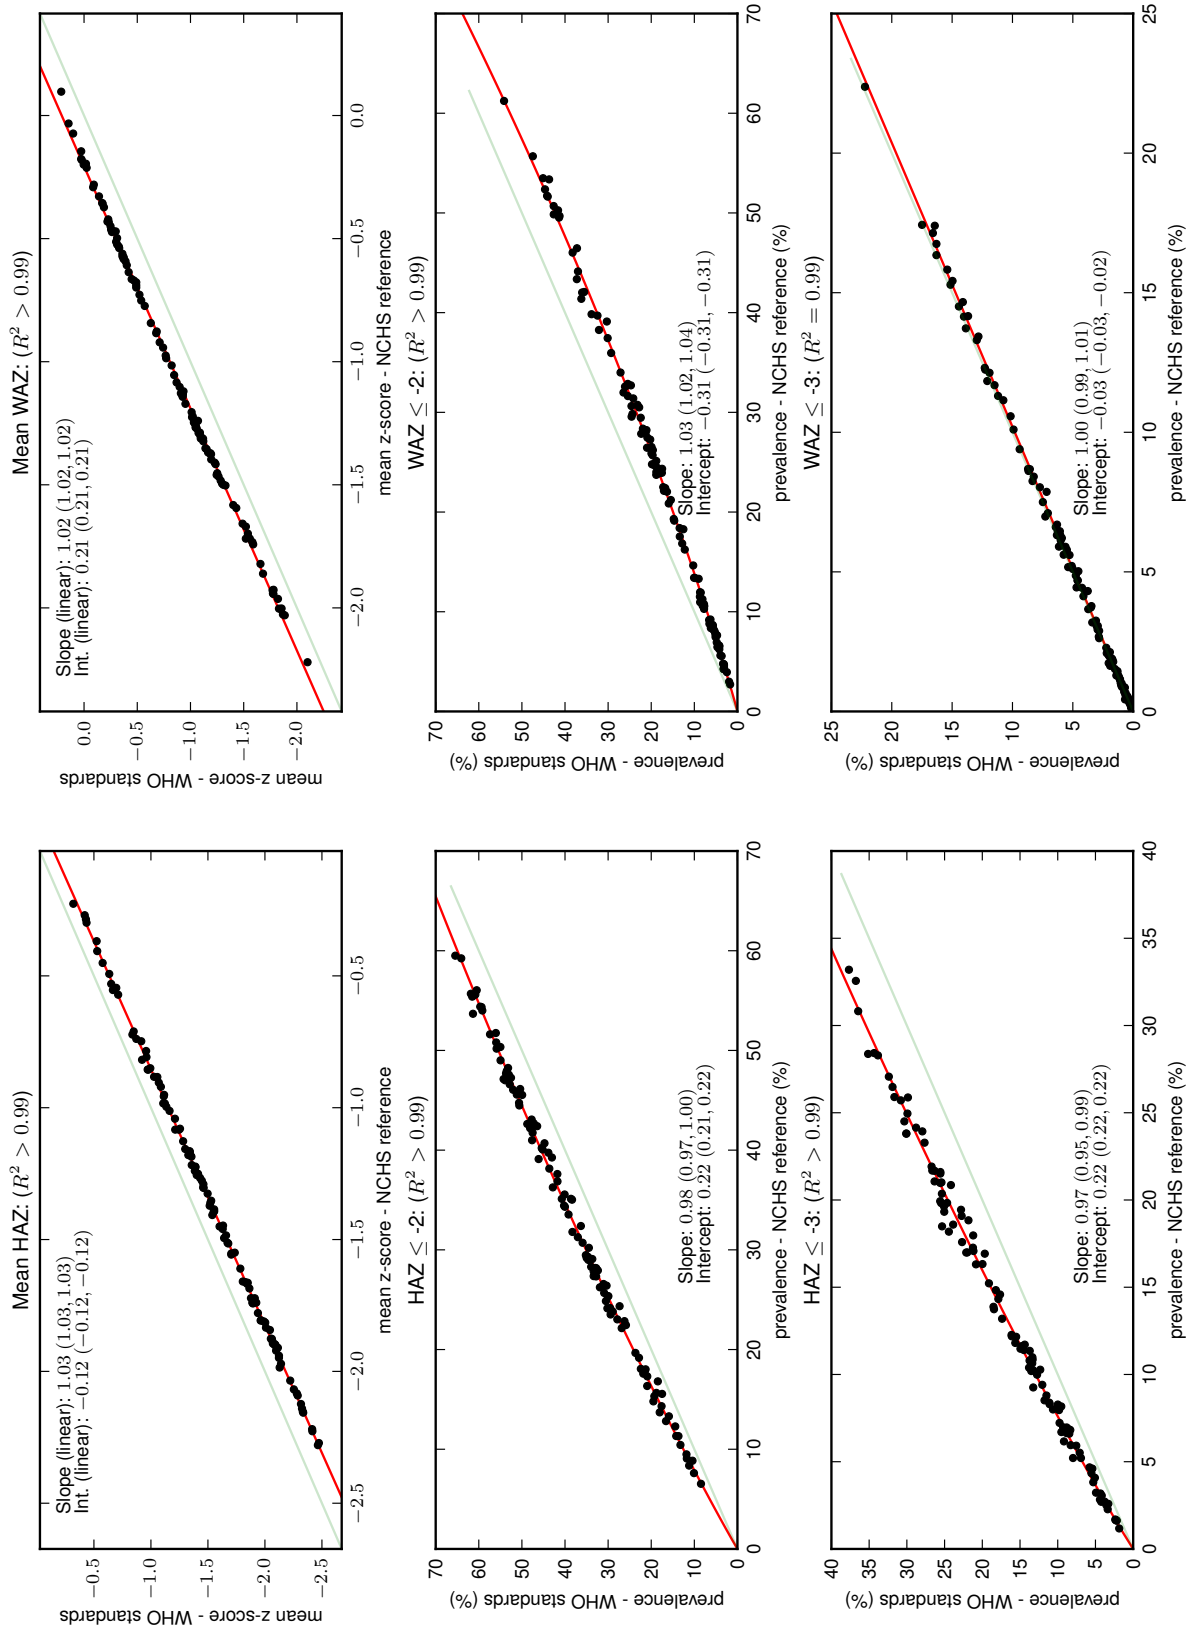

Age range: 0.75-1.99 years ( $n = 159$ )

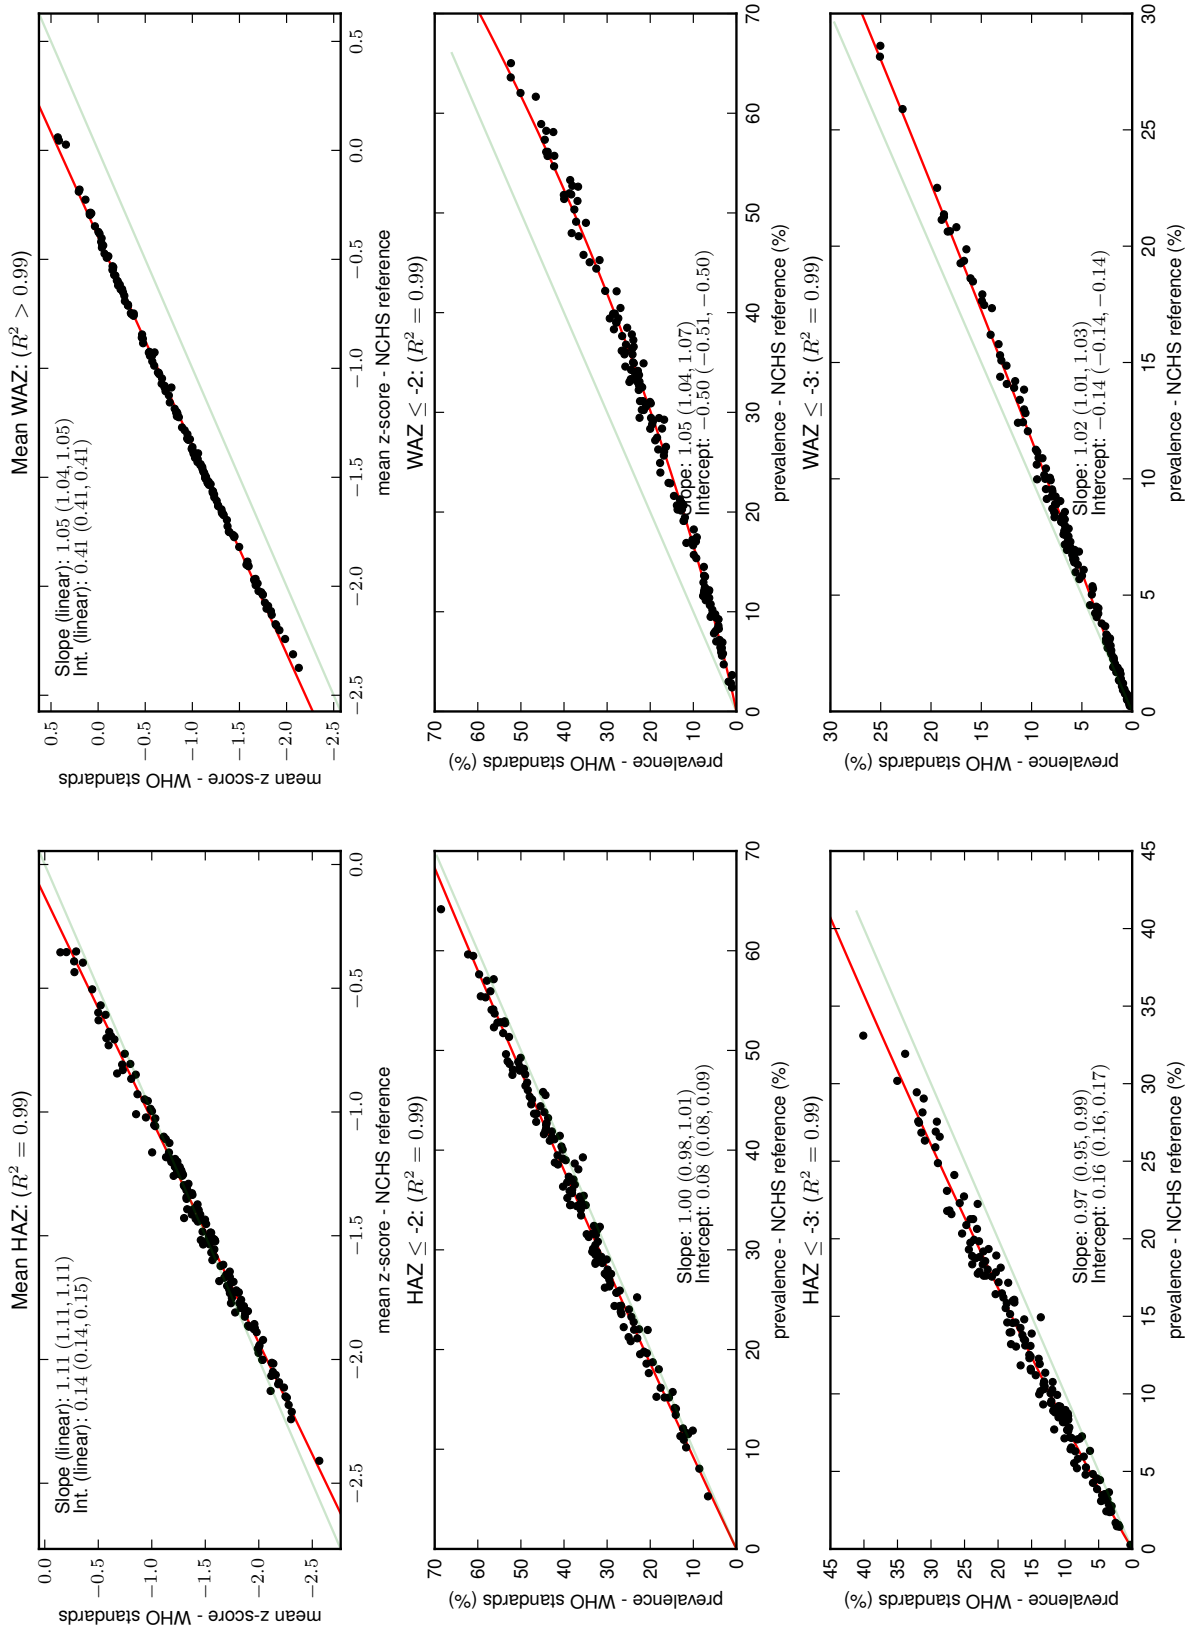

Age range: 1.00-1.49 years ( $n = 159$ )

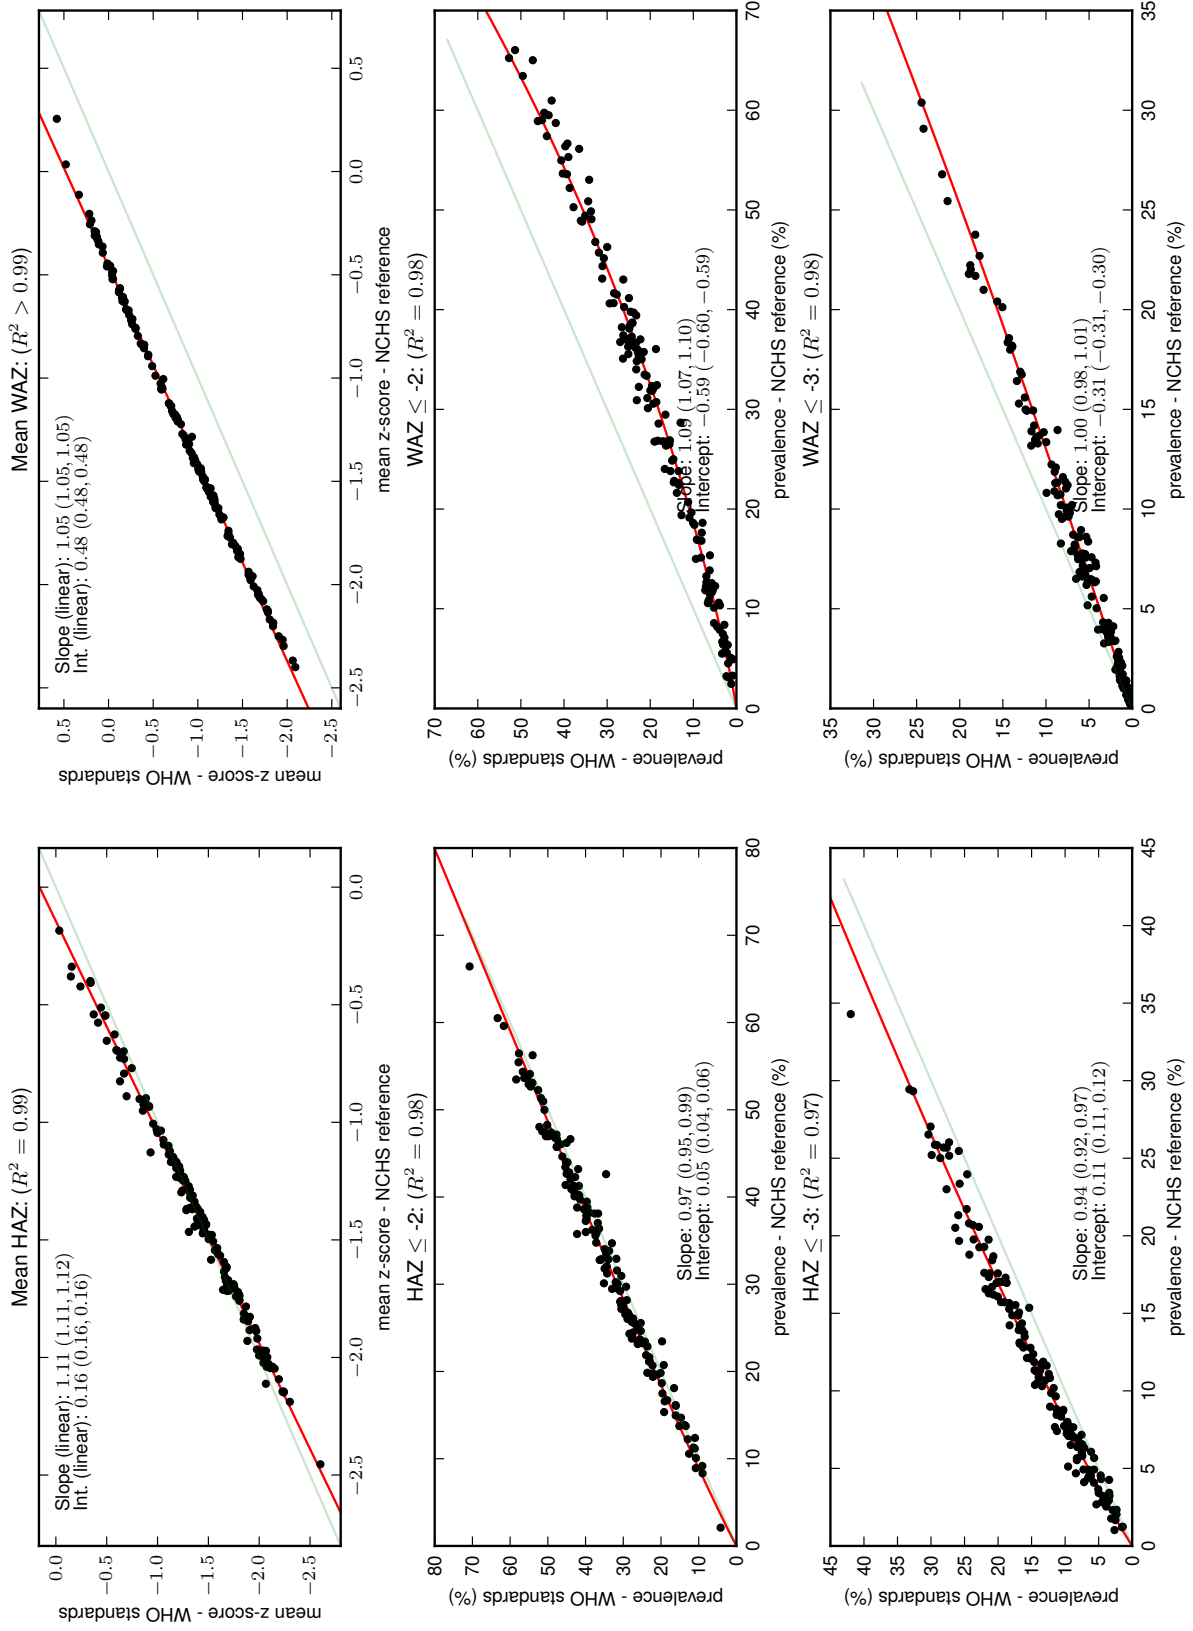

Age range: 1.00-1.99 years ( $n = 159$ )

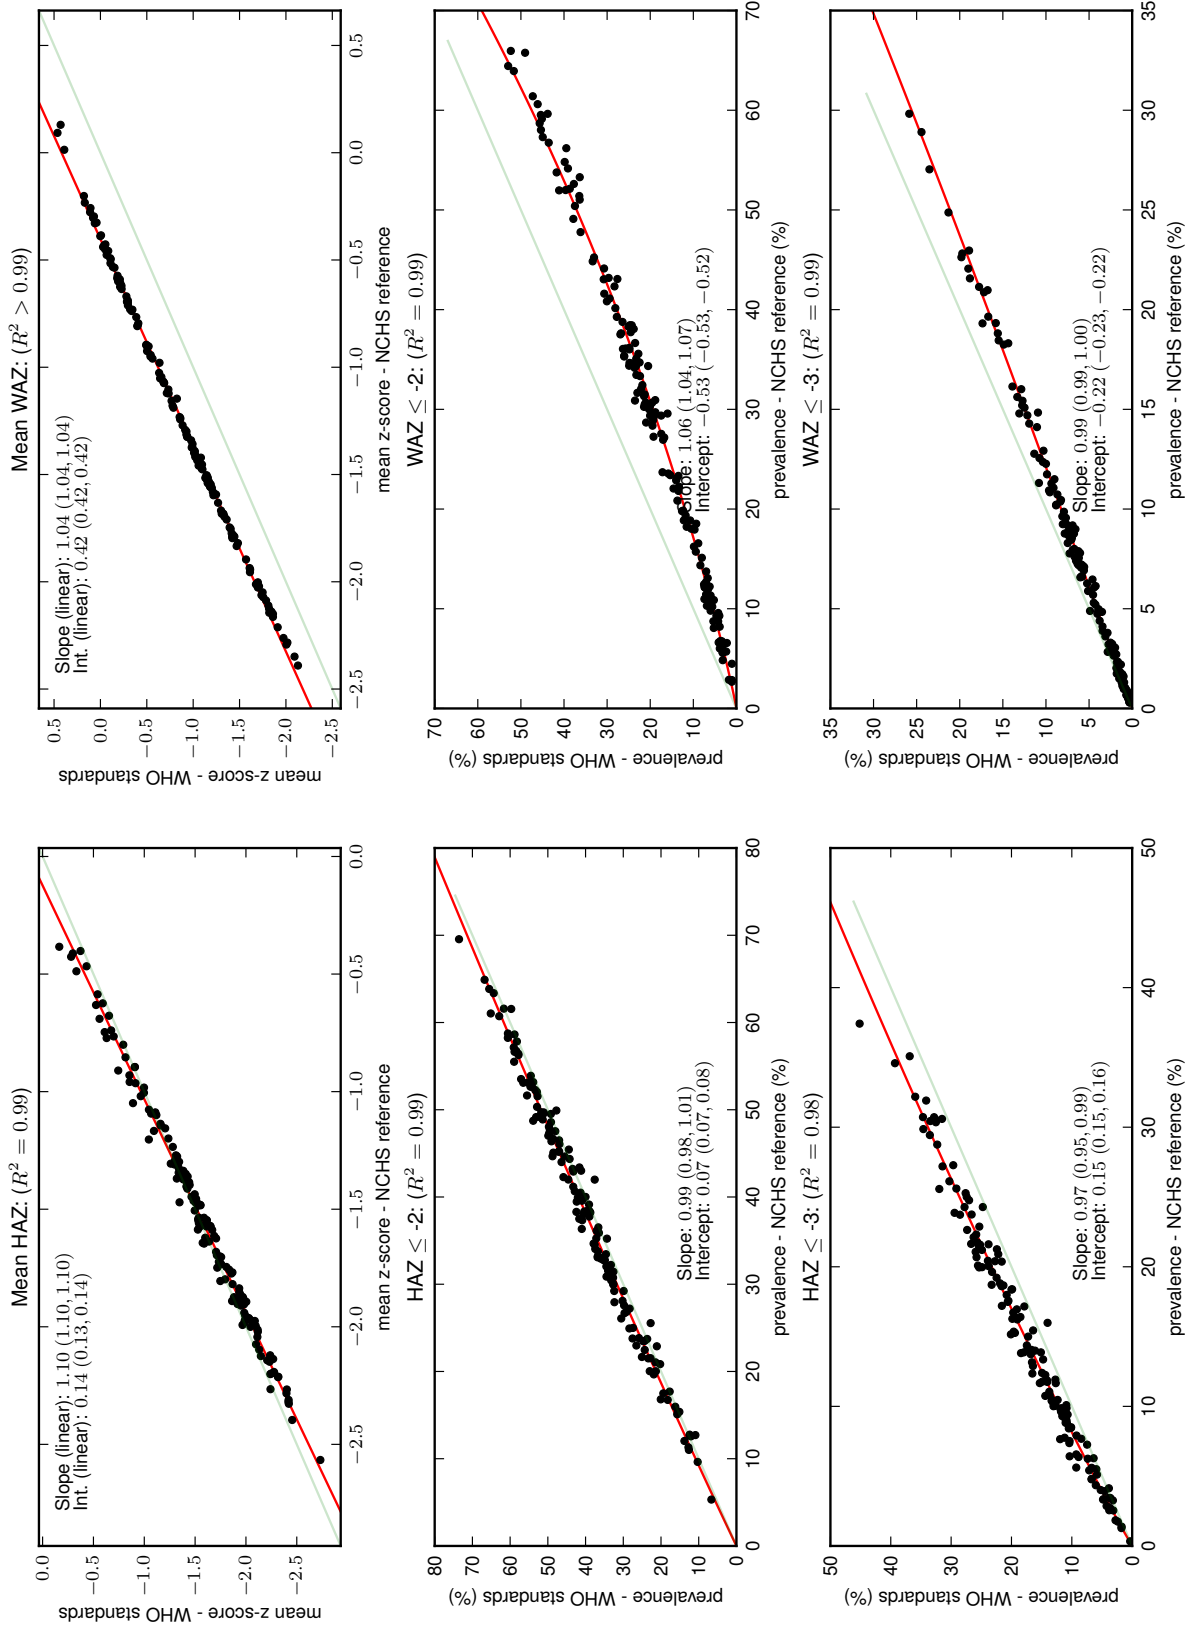

Age range: 1.00-2.99 years ( $n = 149$ )

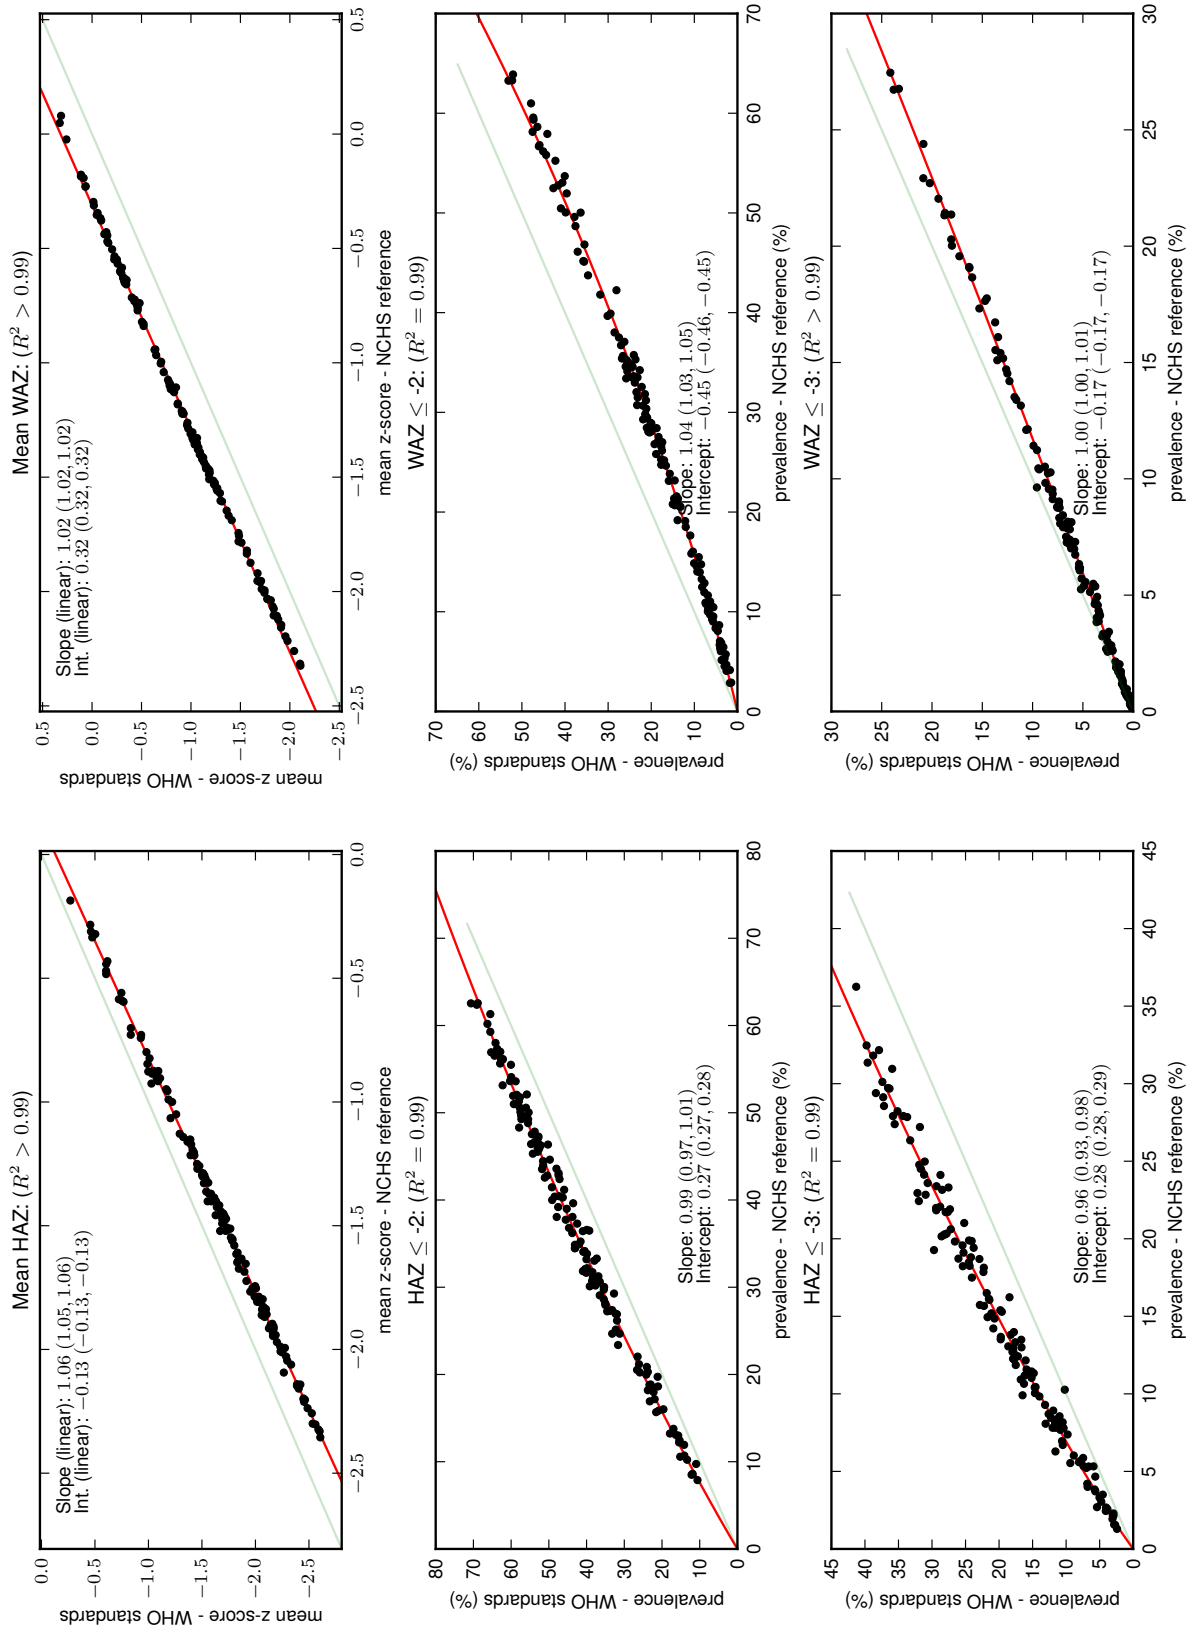

Age range: 1.00-3.99 years ( $n = 121$ )

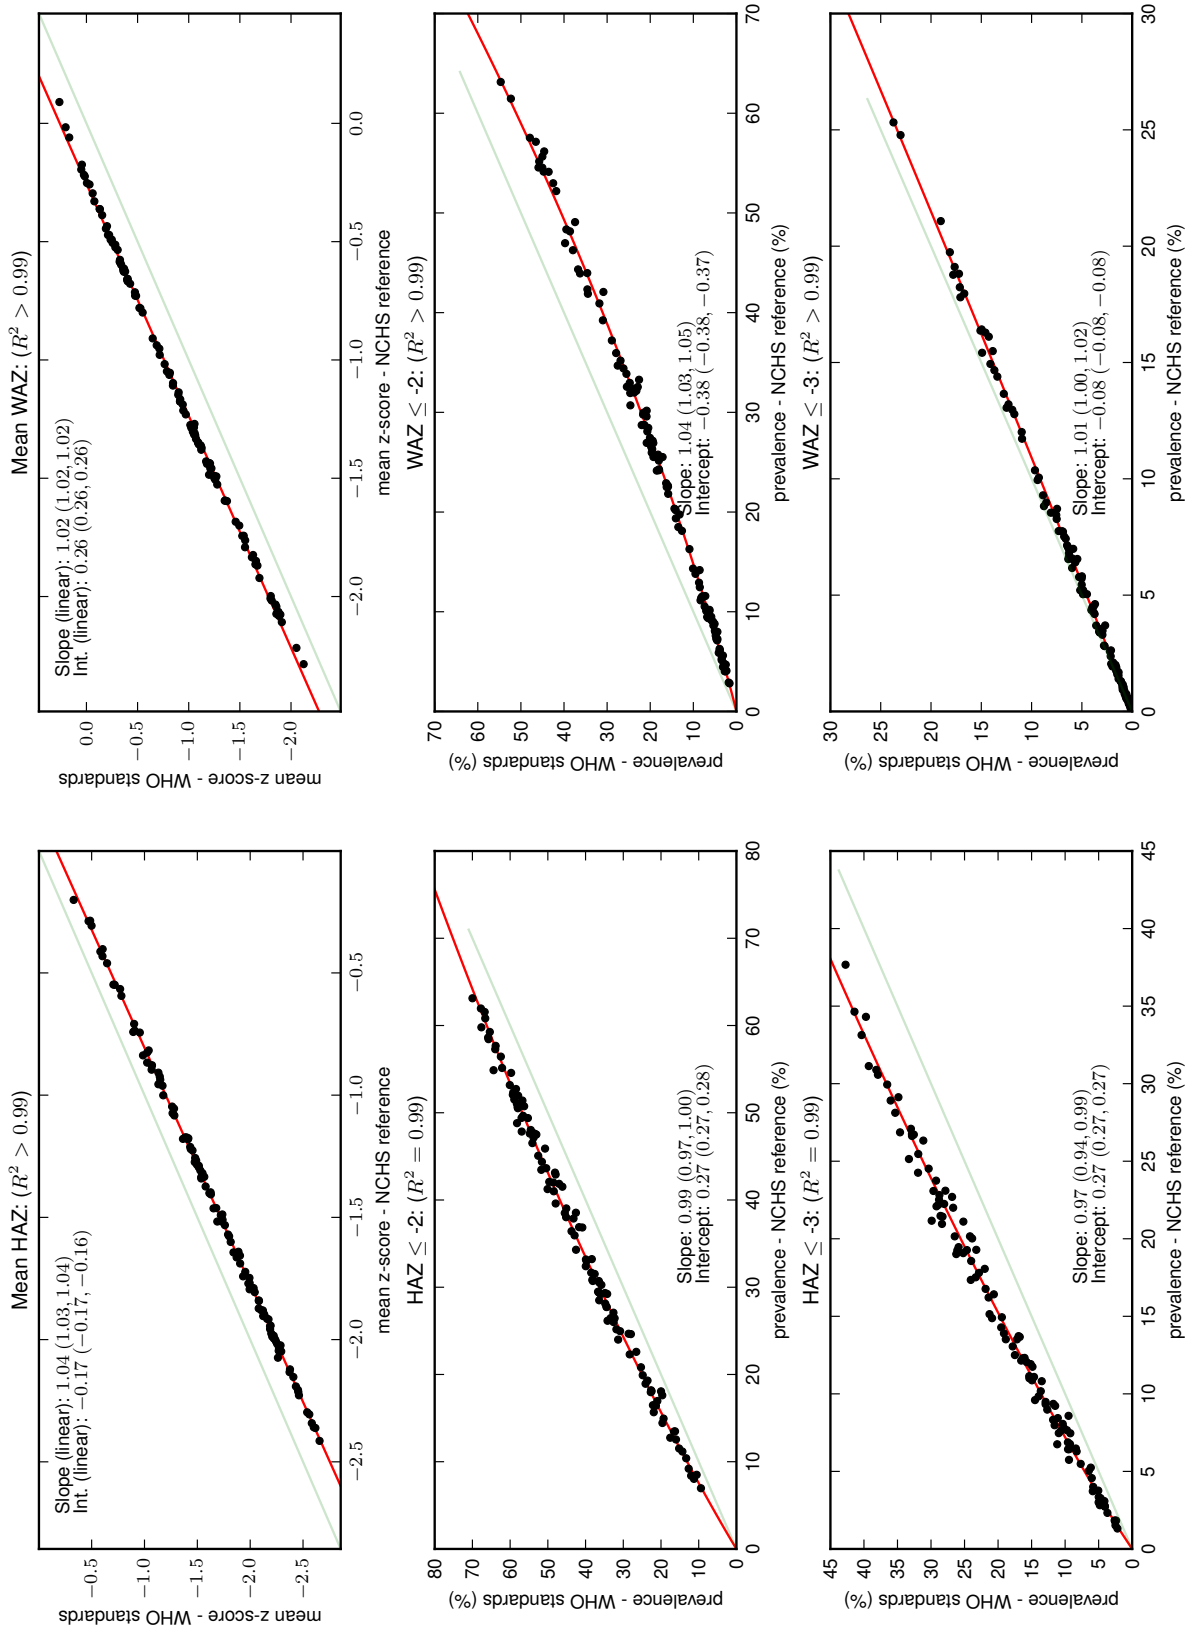



Age range: 1.00-4.99 years ( $n = 119$ )

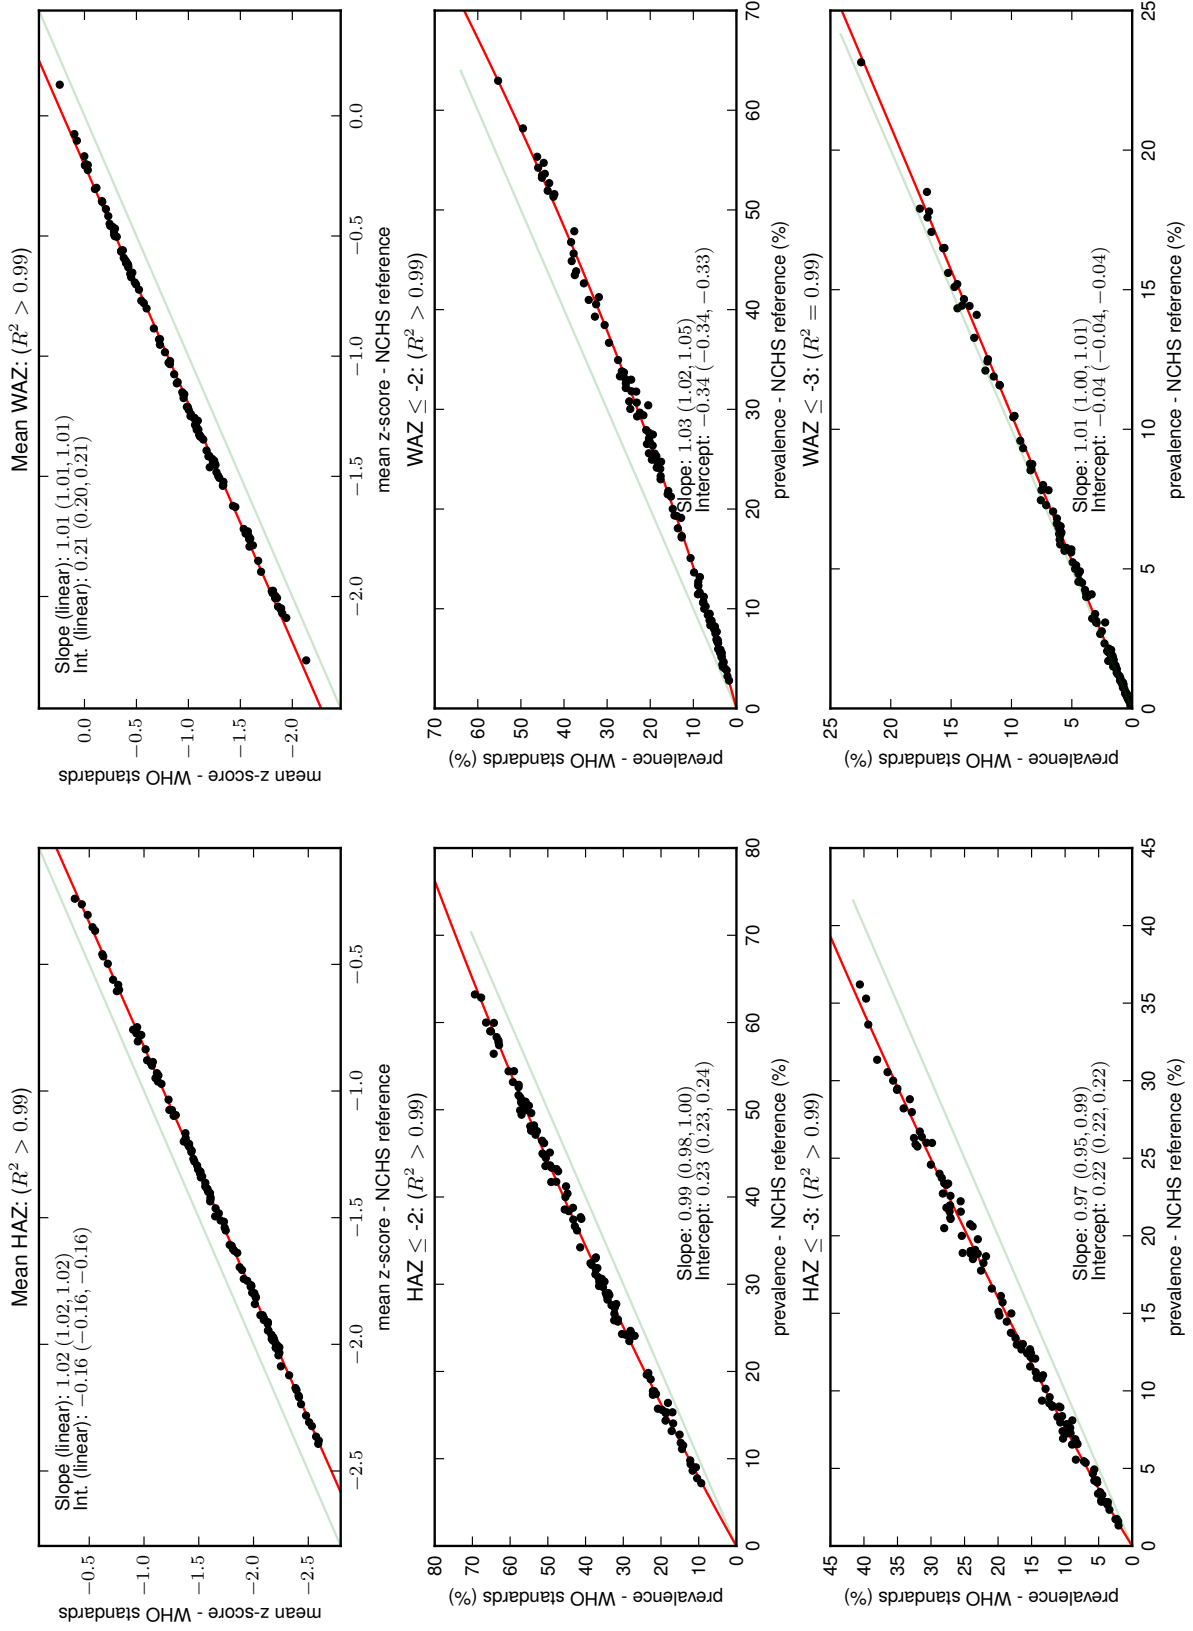

Age range: 1.50-1.99 years ( $n = 159$ )

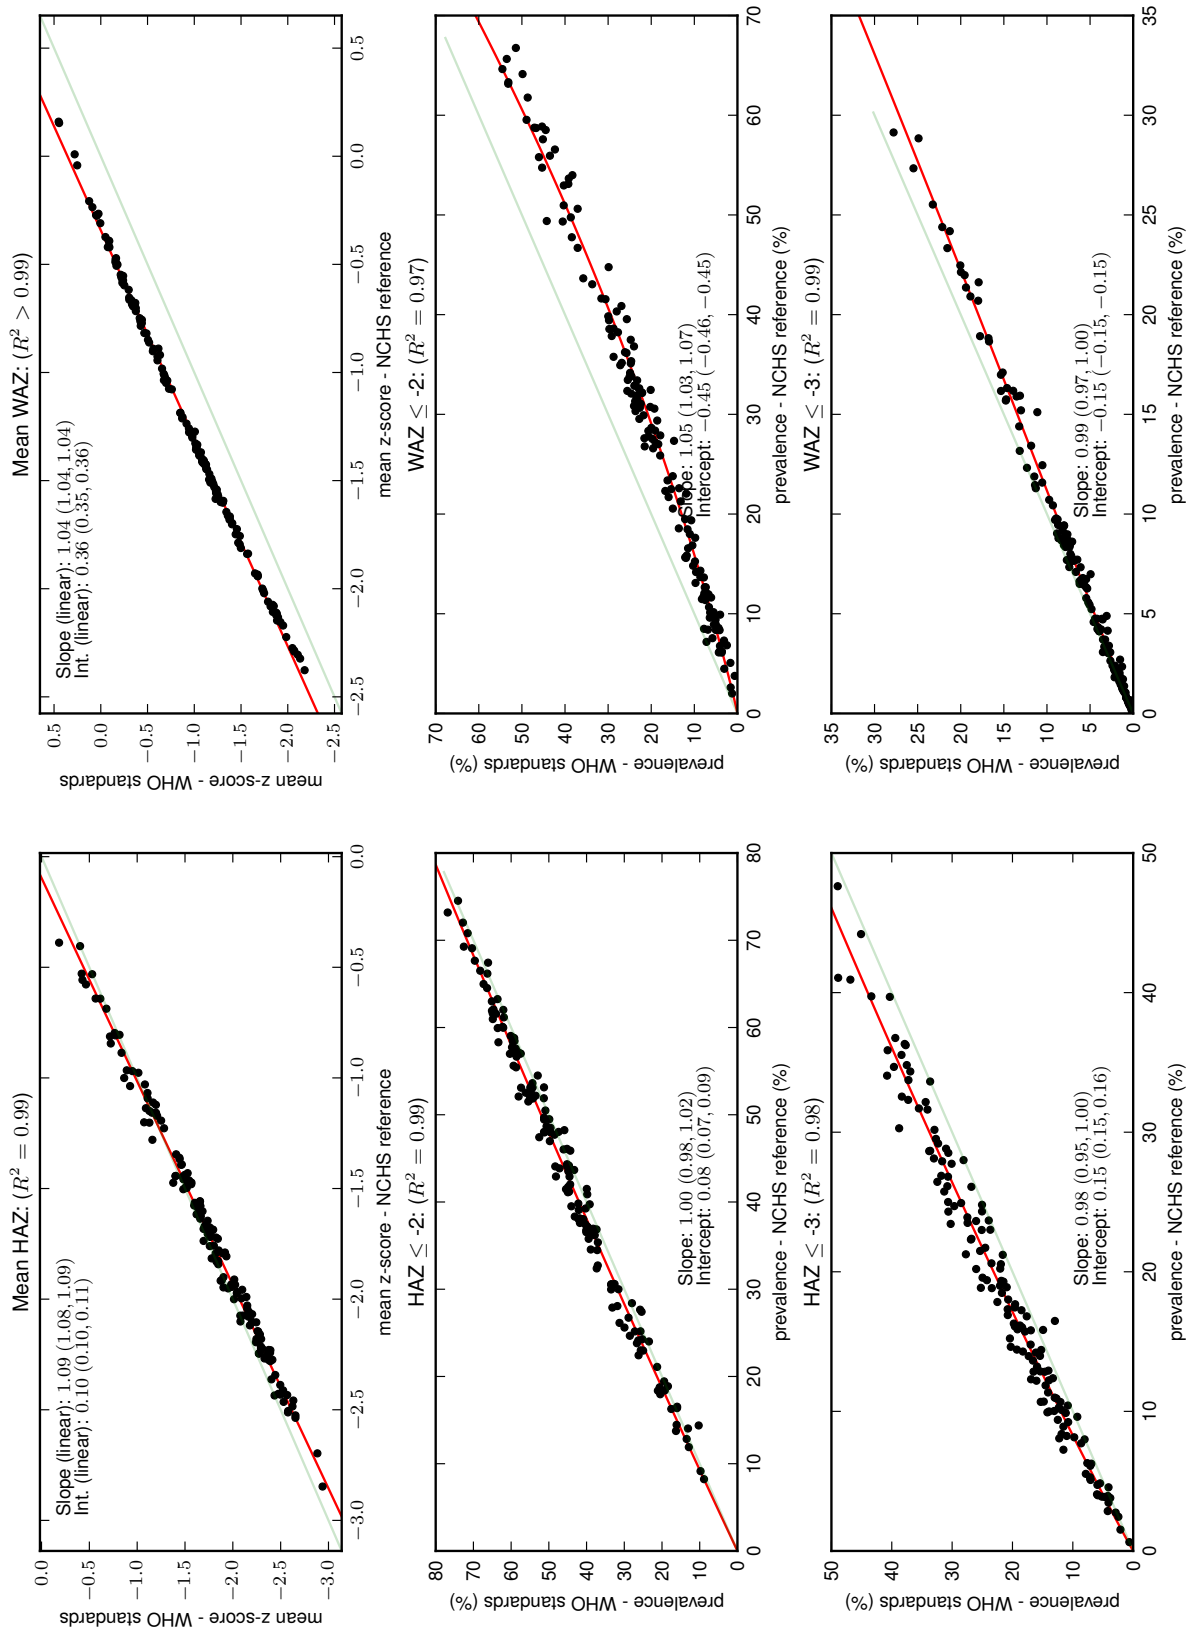

Age range: 1.50-2.49 years ( $n = 141$ )

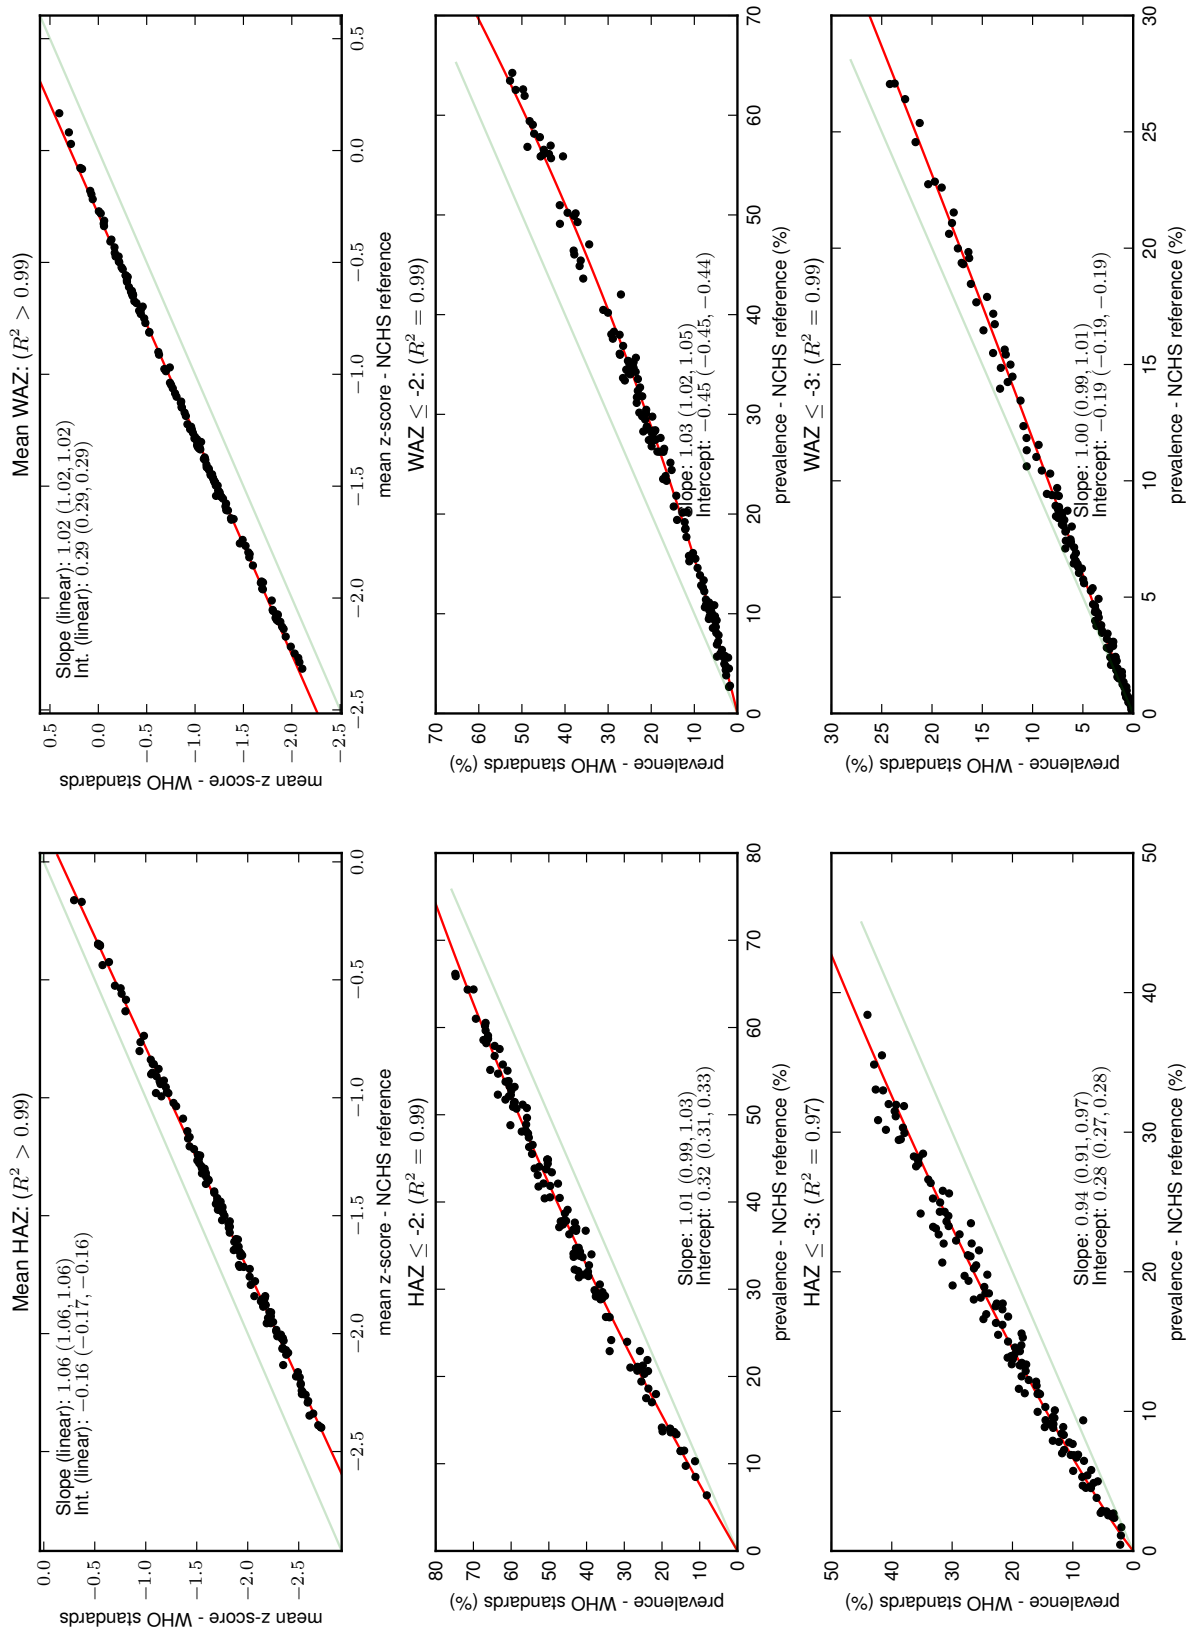

Age range: 2.00-2.49 years ( $n = 141$ )

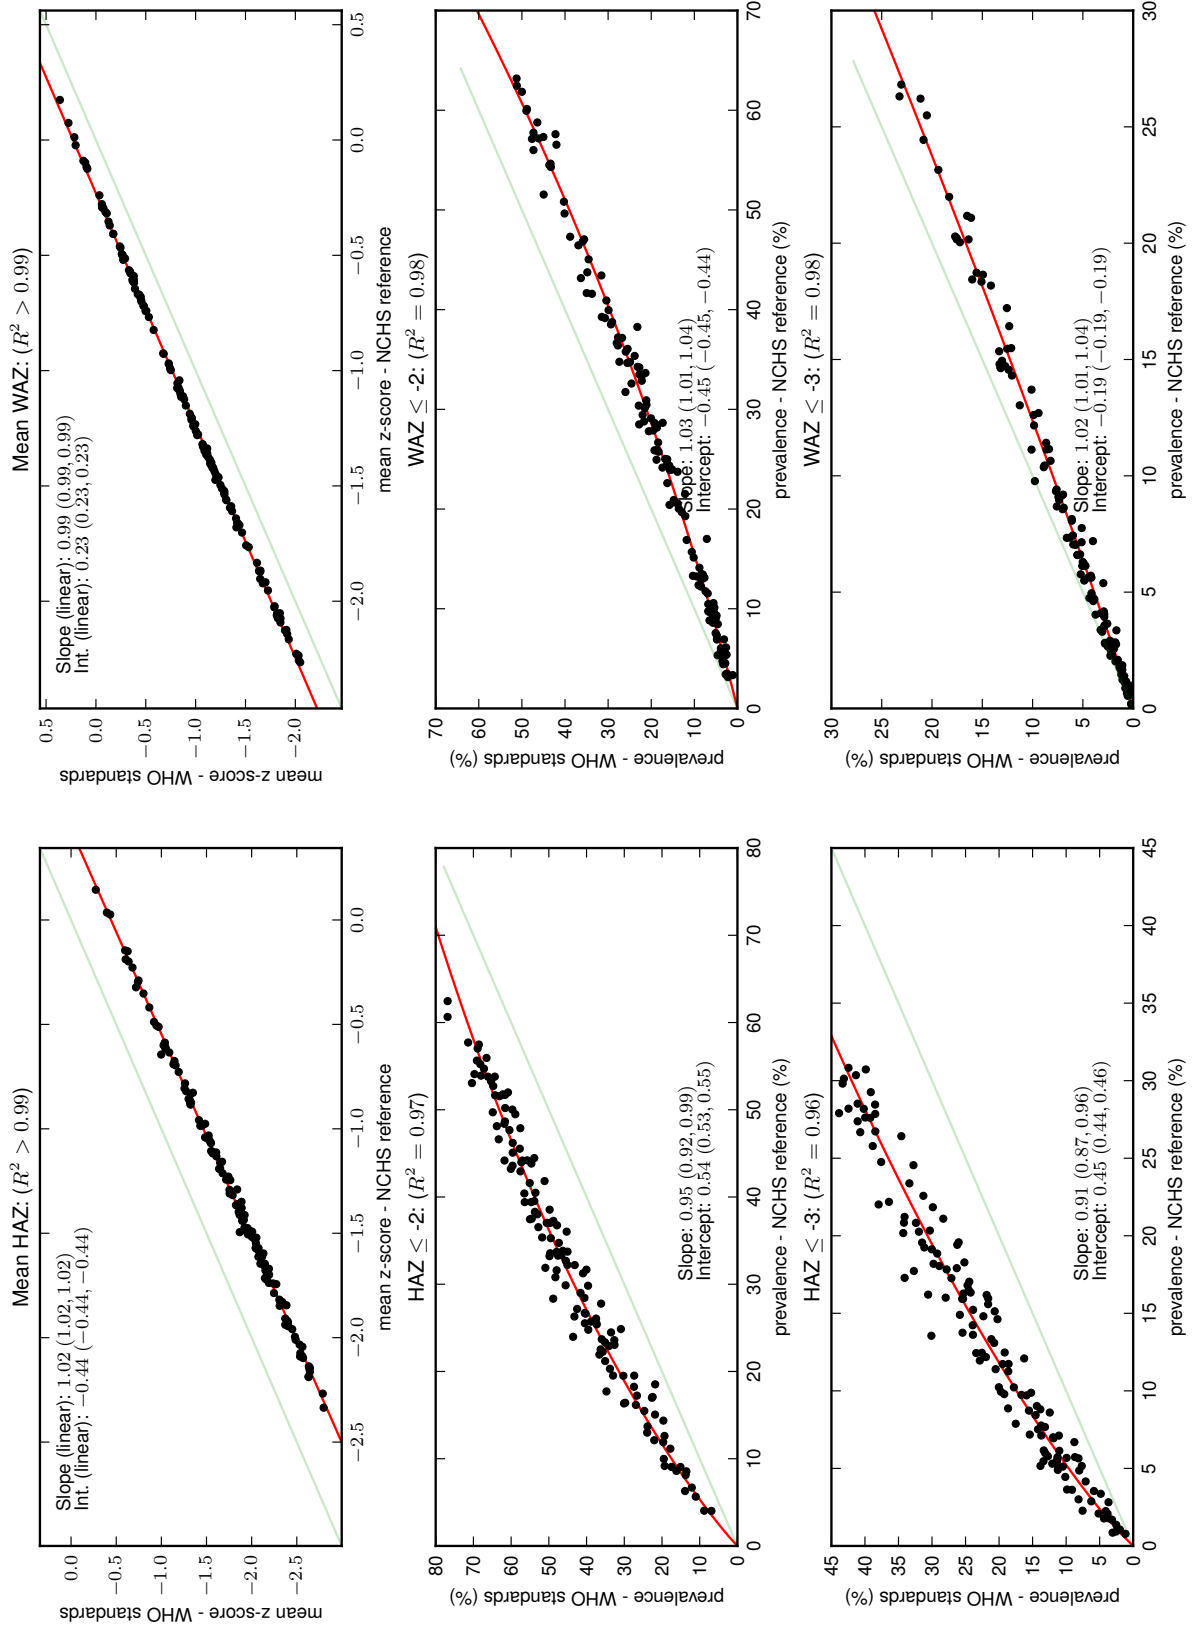

Age range: 2.00-2.99 years ( $n = 141$ )

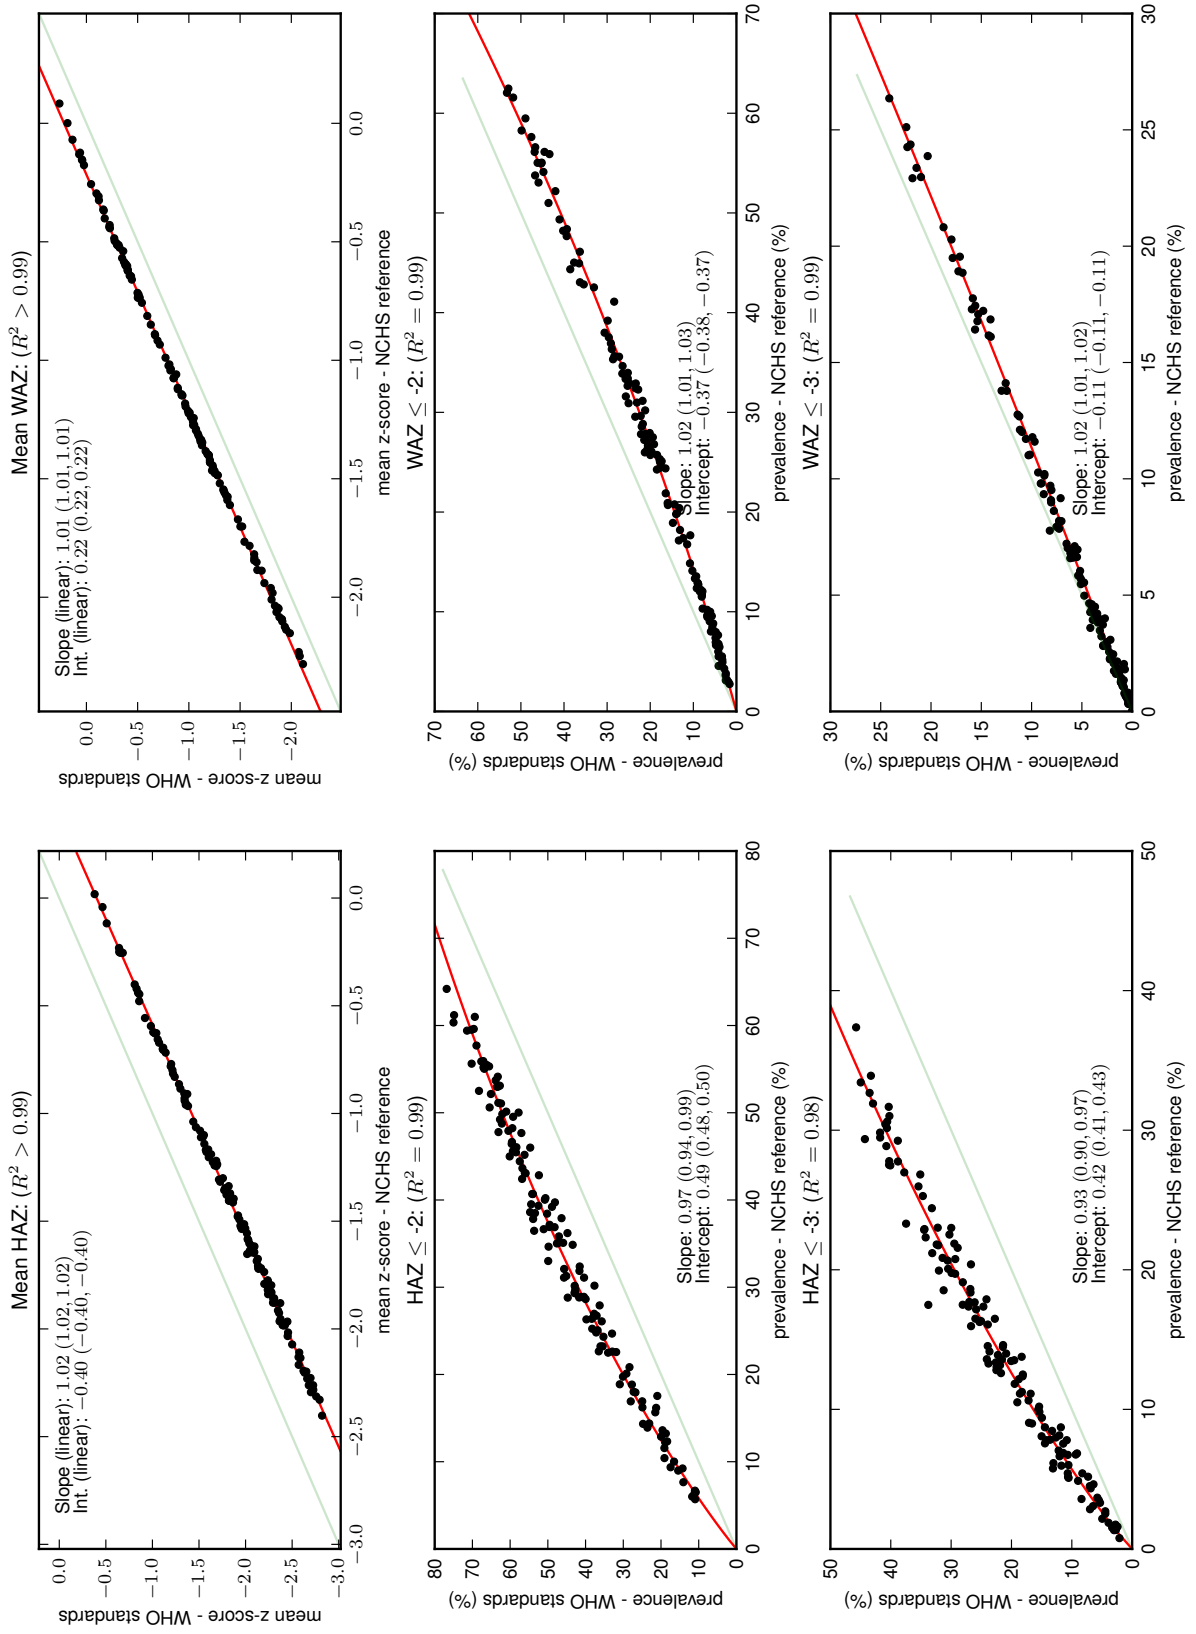

Age range: 2.00-3.99 years ( $n = 121$ )

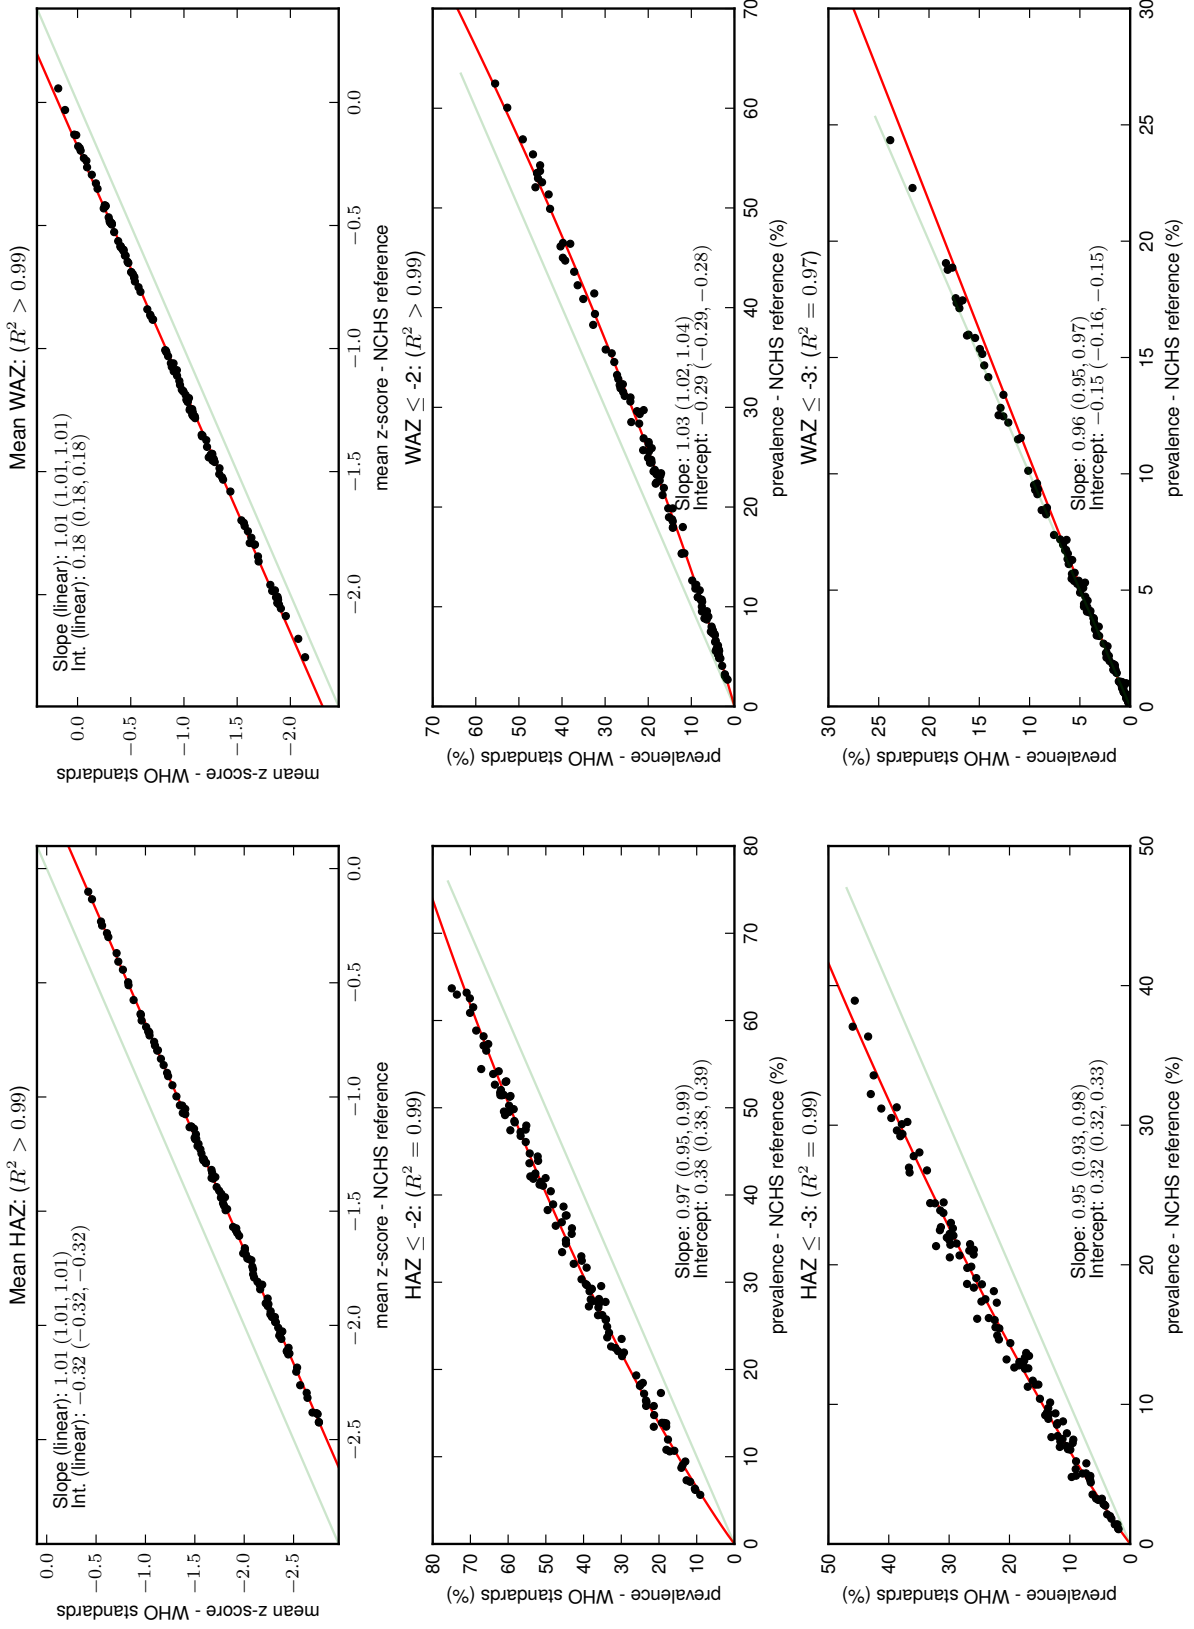

Age range: 2.00-4.99 years ( $n = 119$ )

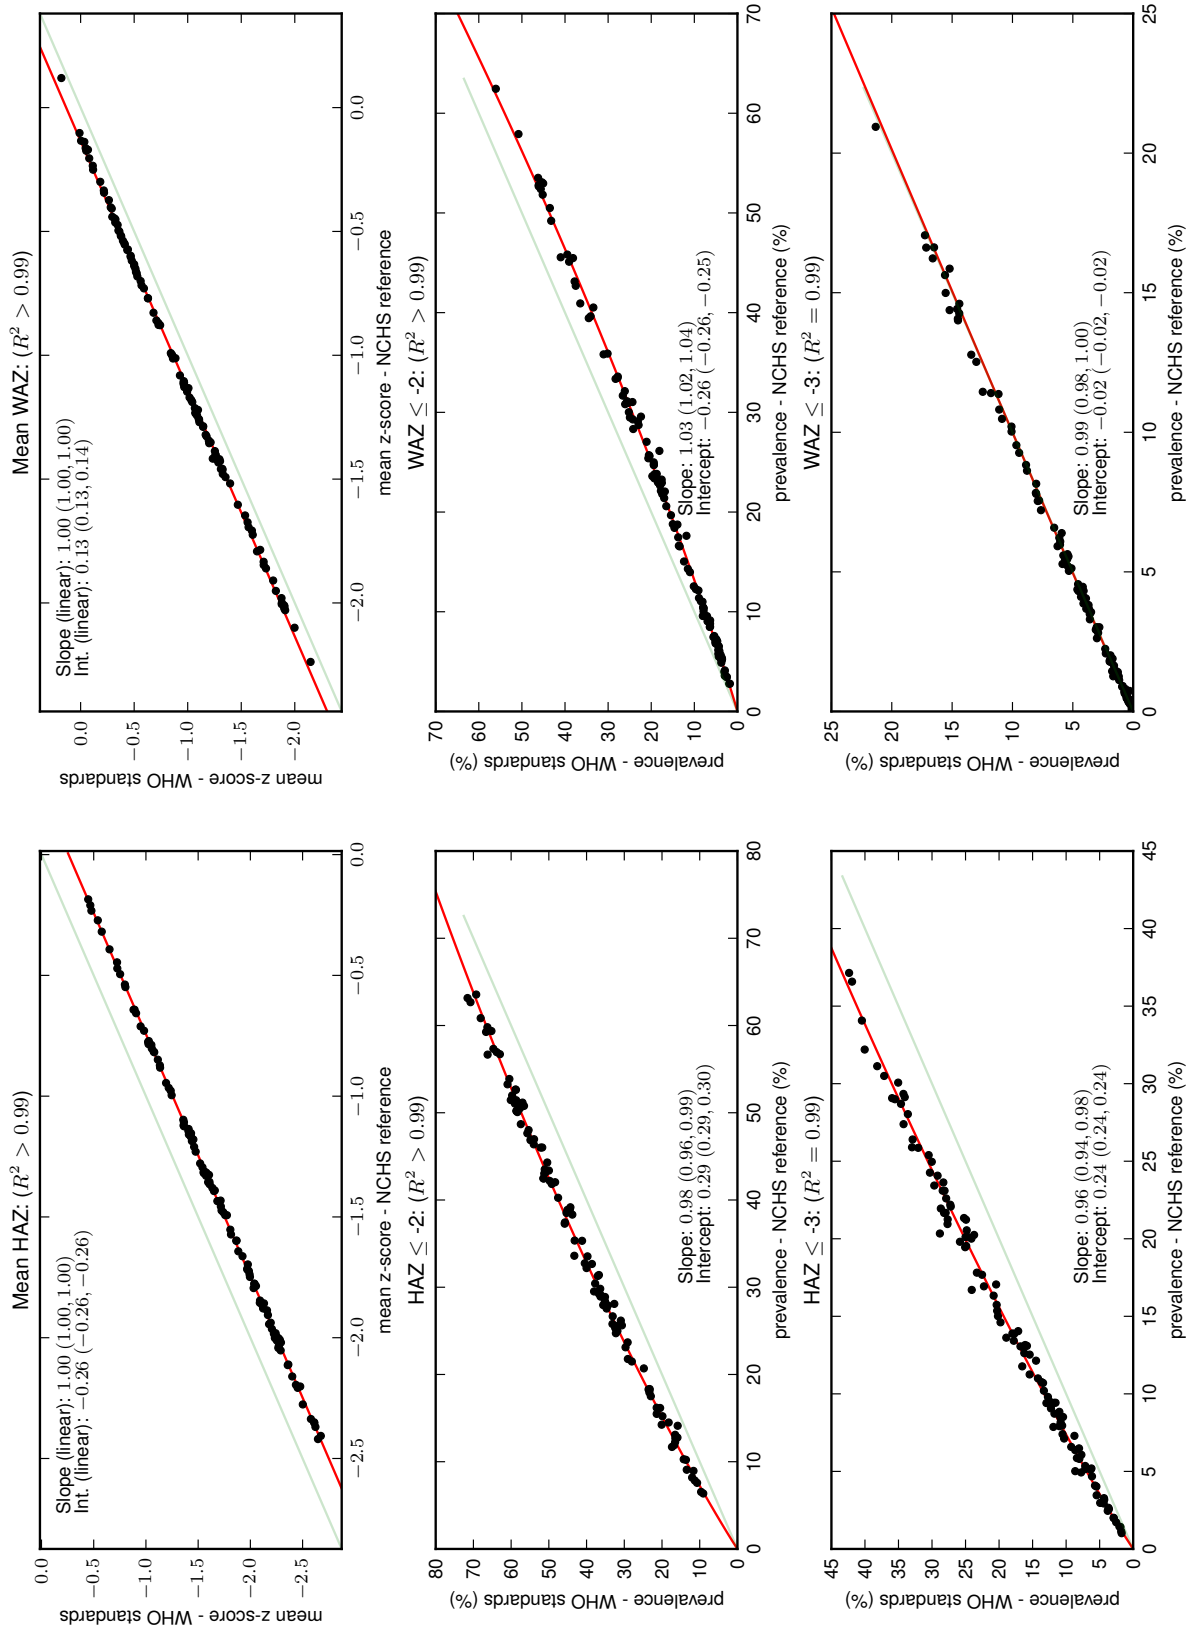

Age range: 2.50-2.99 years ( $n = 141$ )

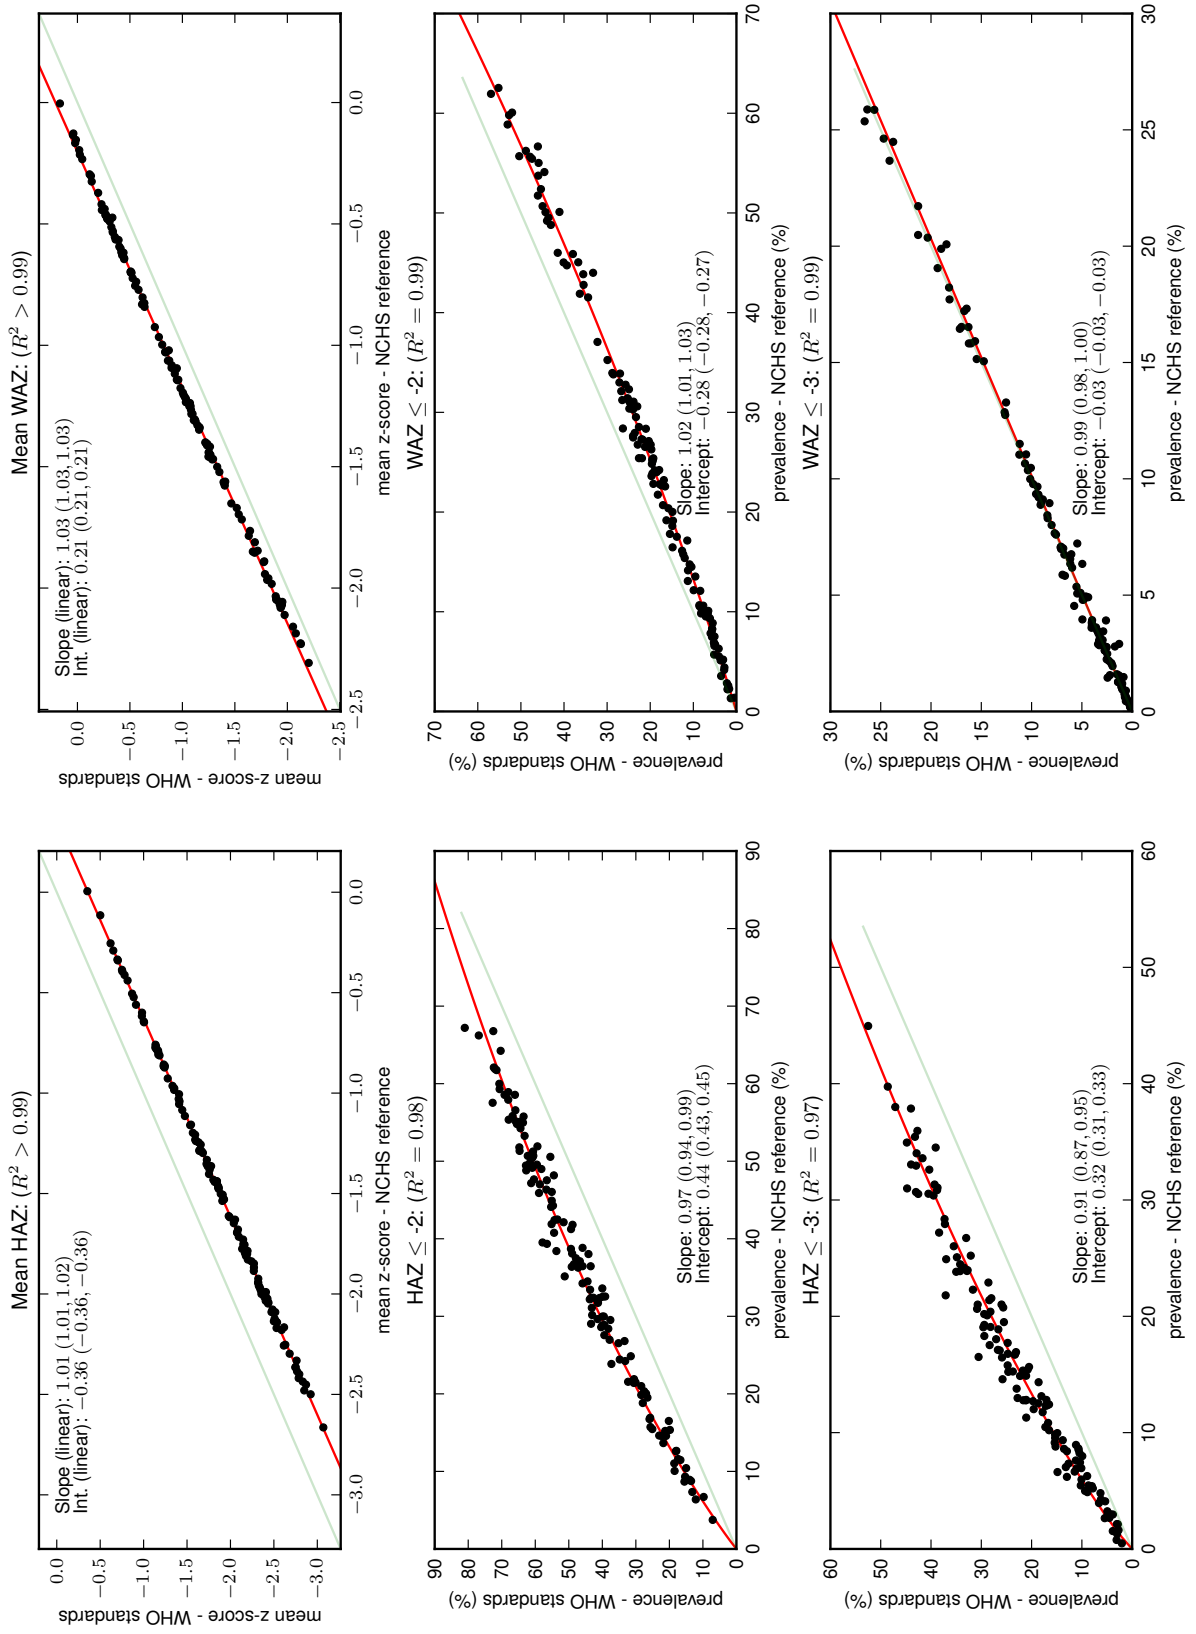



Age range: 2.50-3.49 years ( $n = 121$ )

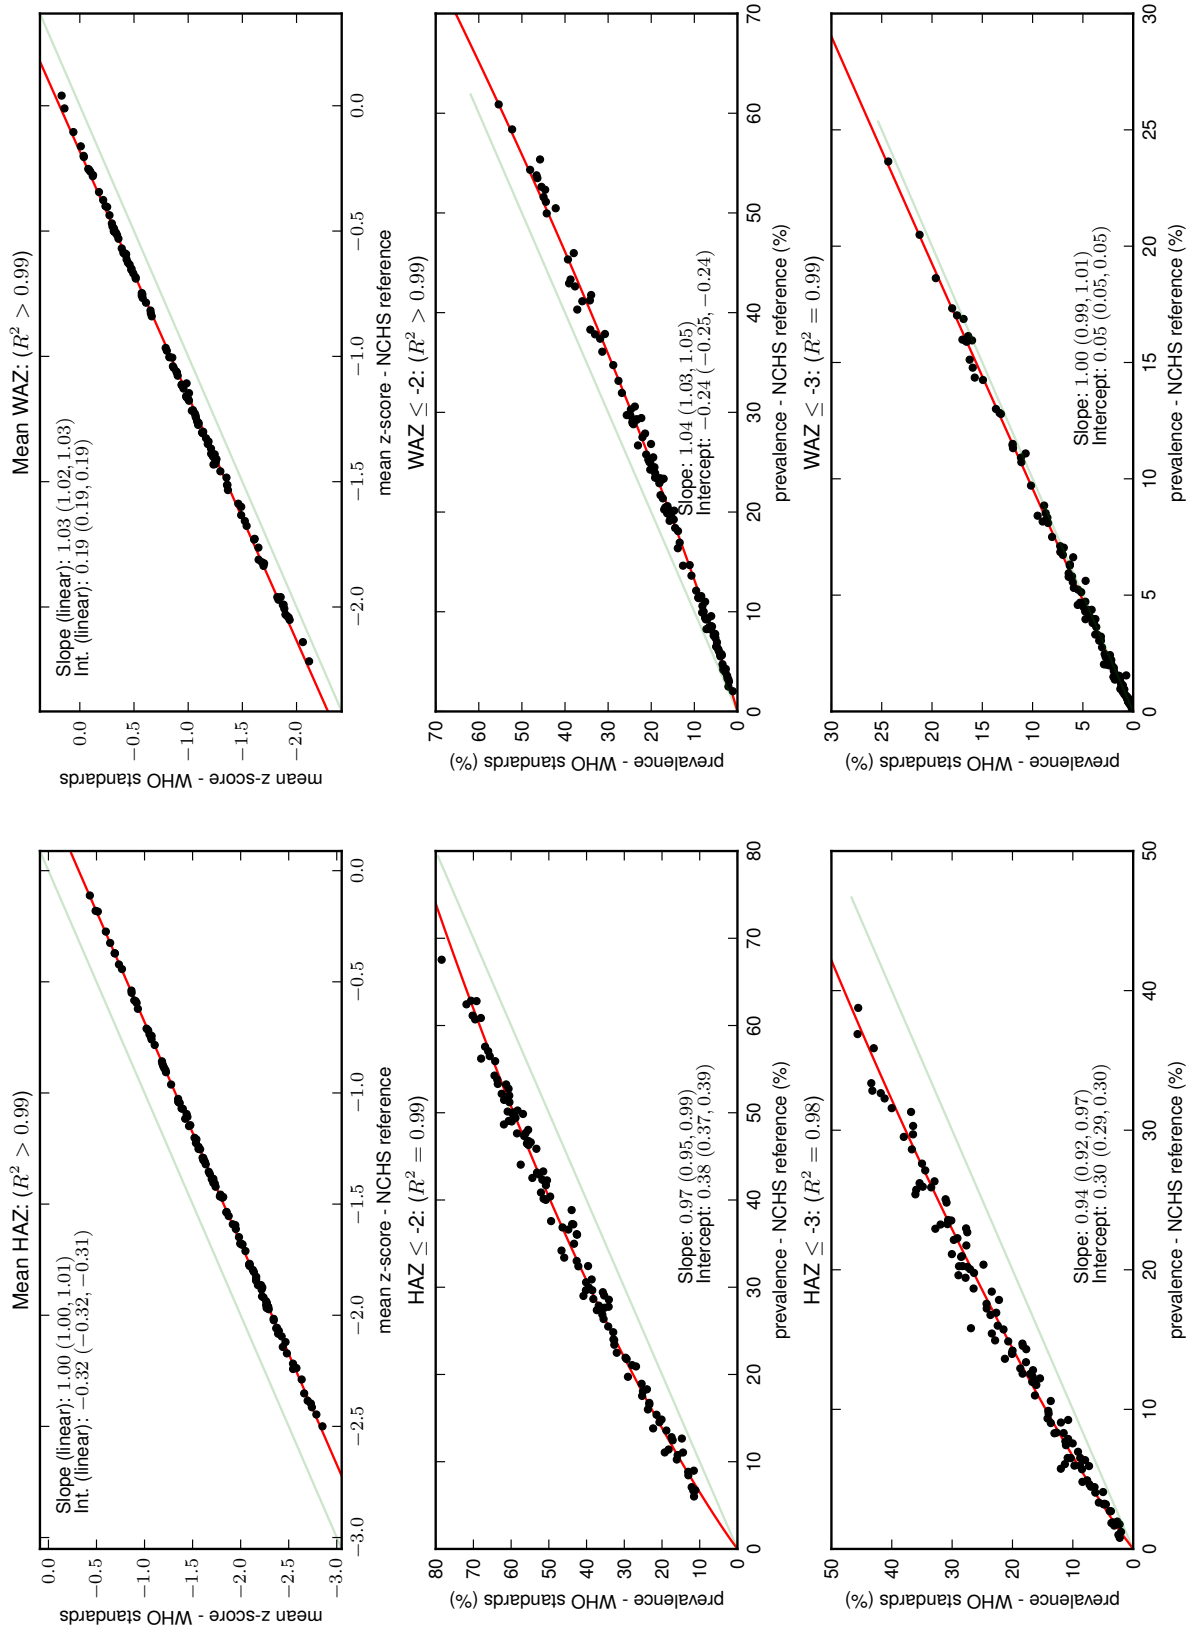

Age range: 3.00-3.99 years ( $n = 121$ )

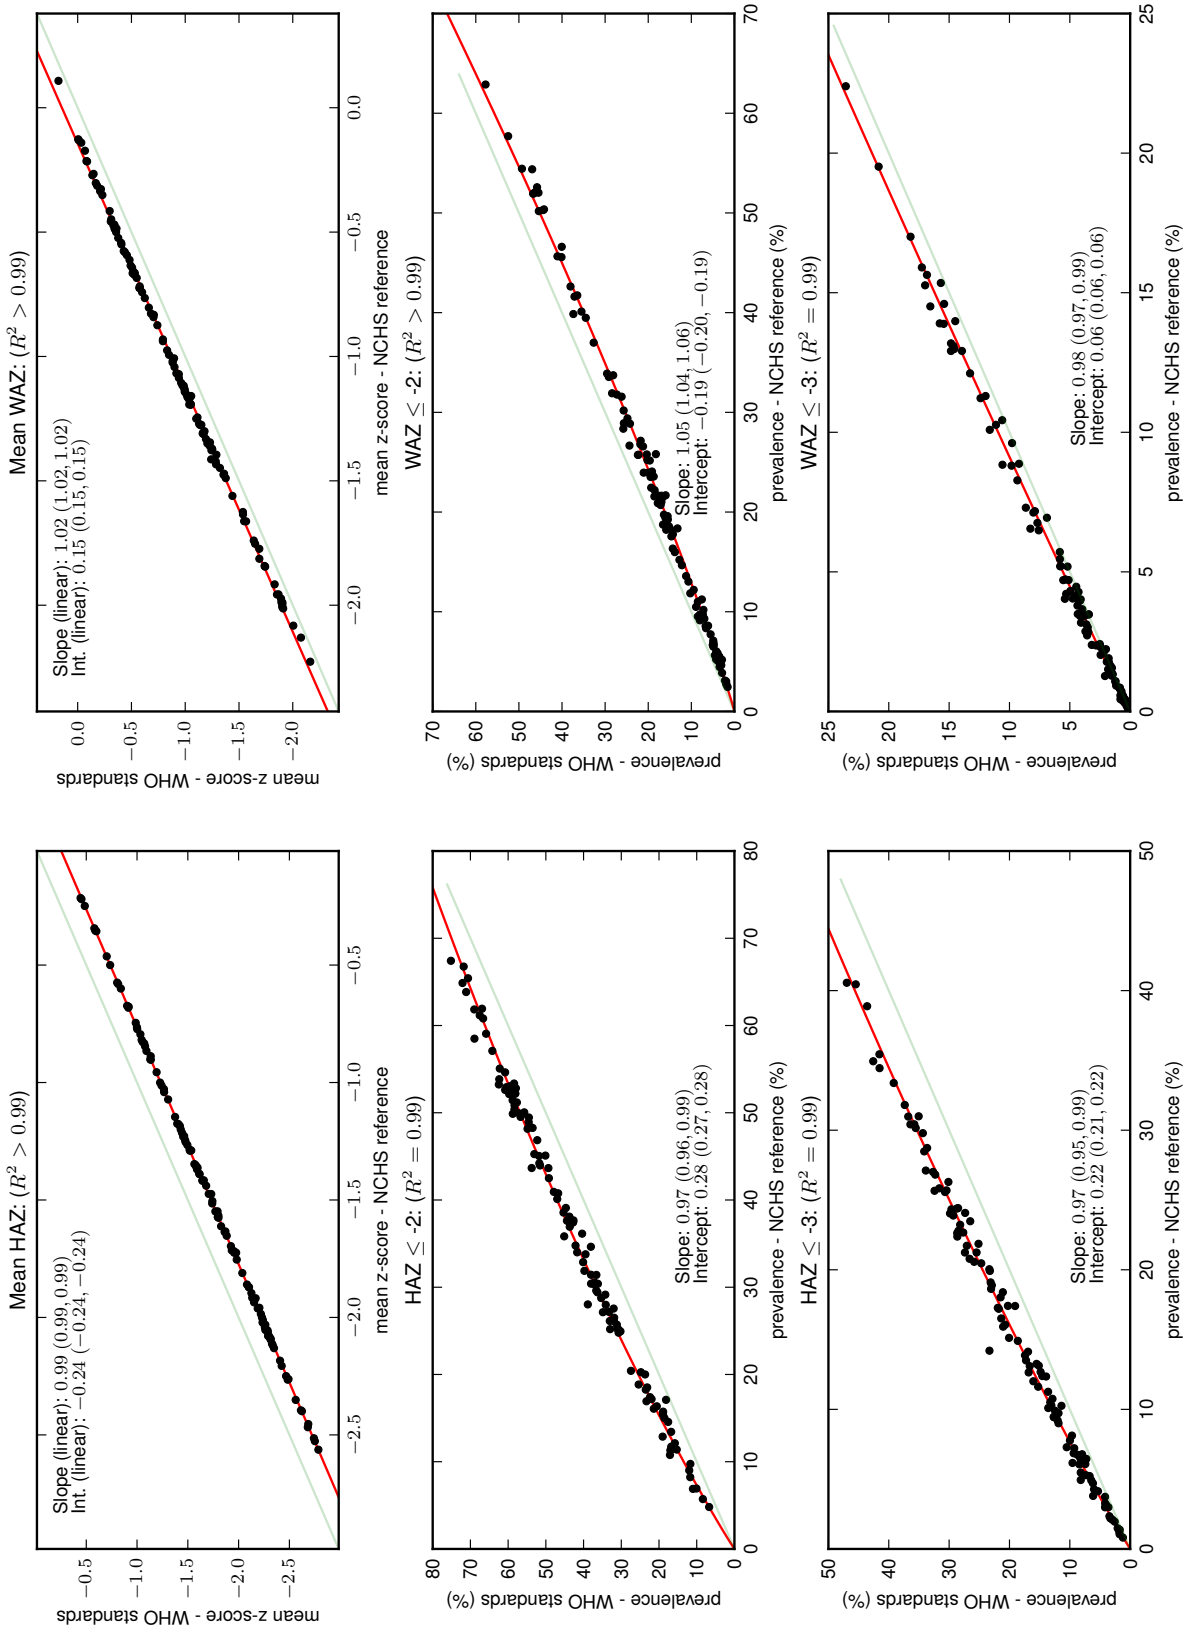

Age range: 3.00-4.99 years ( $n = 119$ )

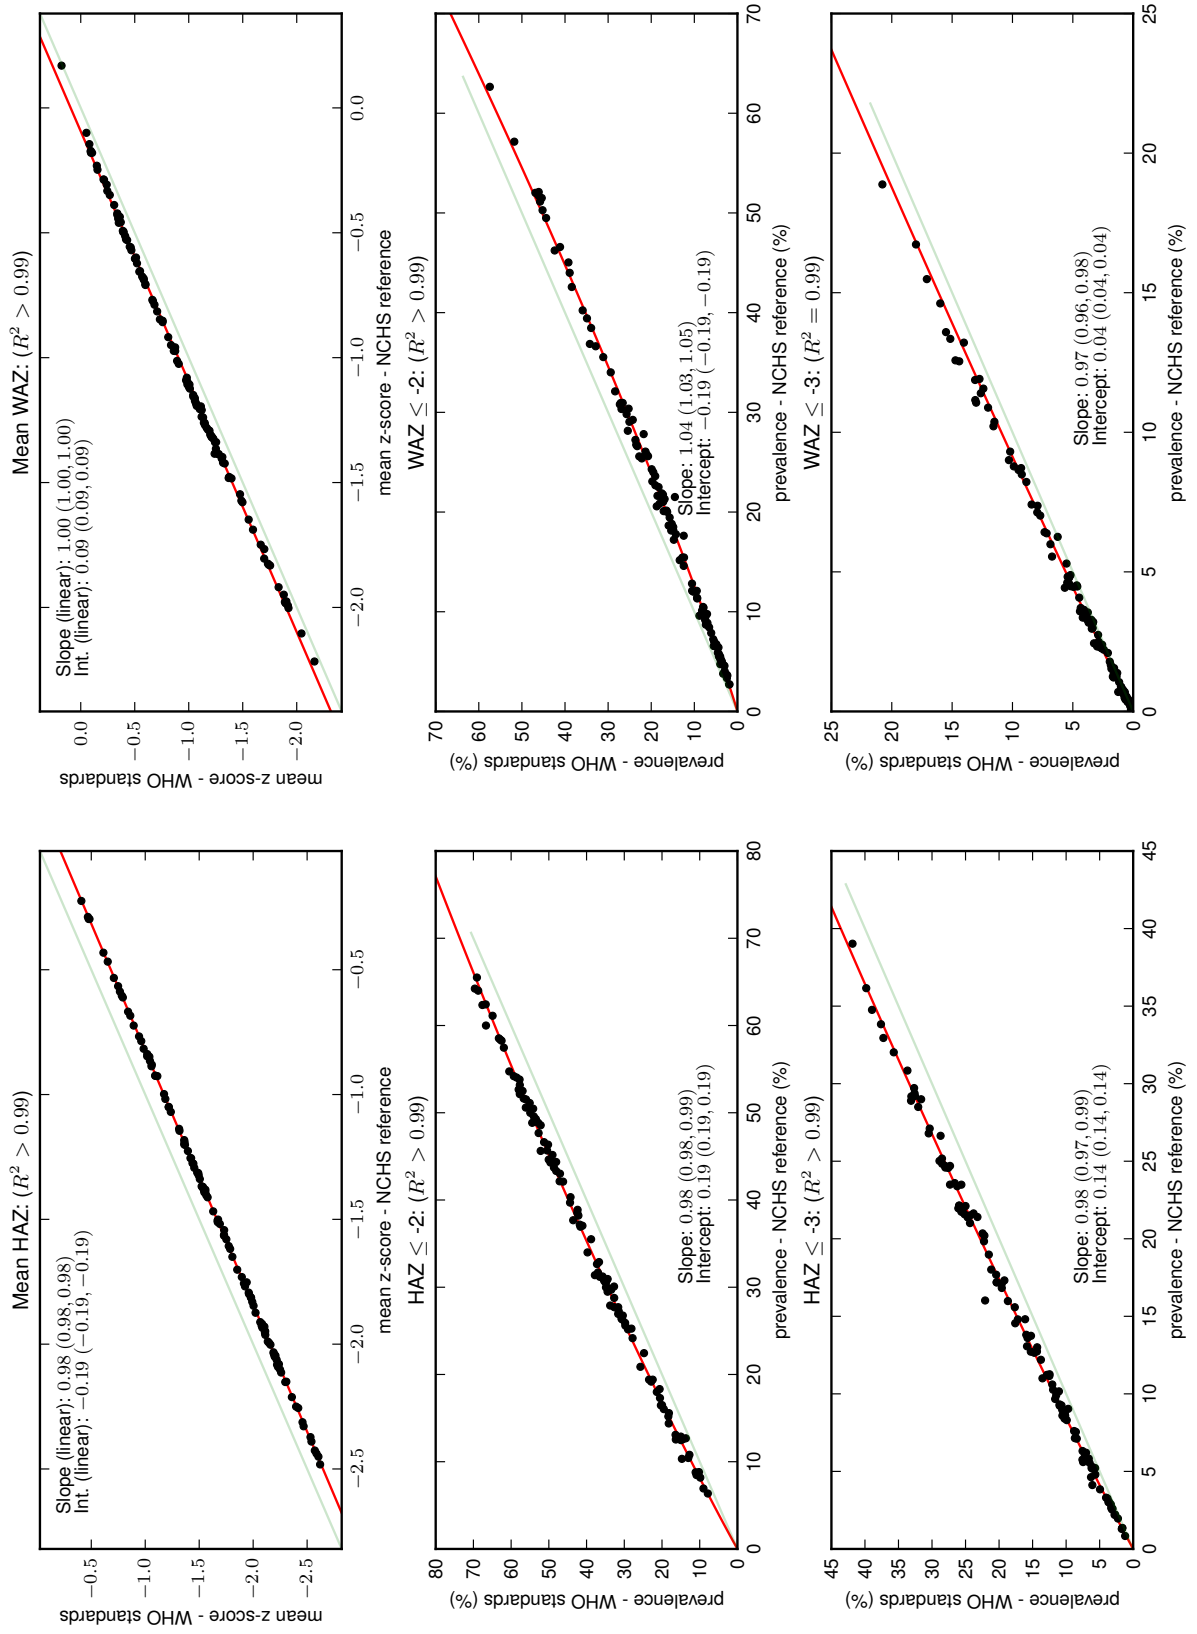

Age range: 3.50-4.49 years ( $n = 119$ )

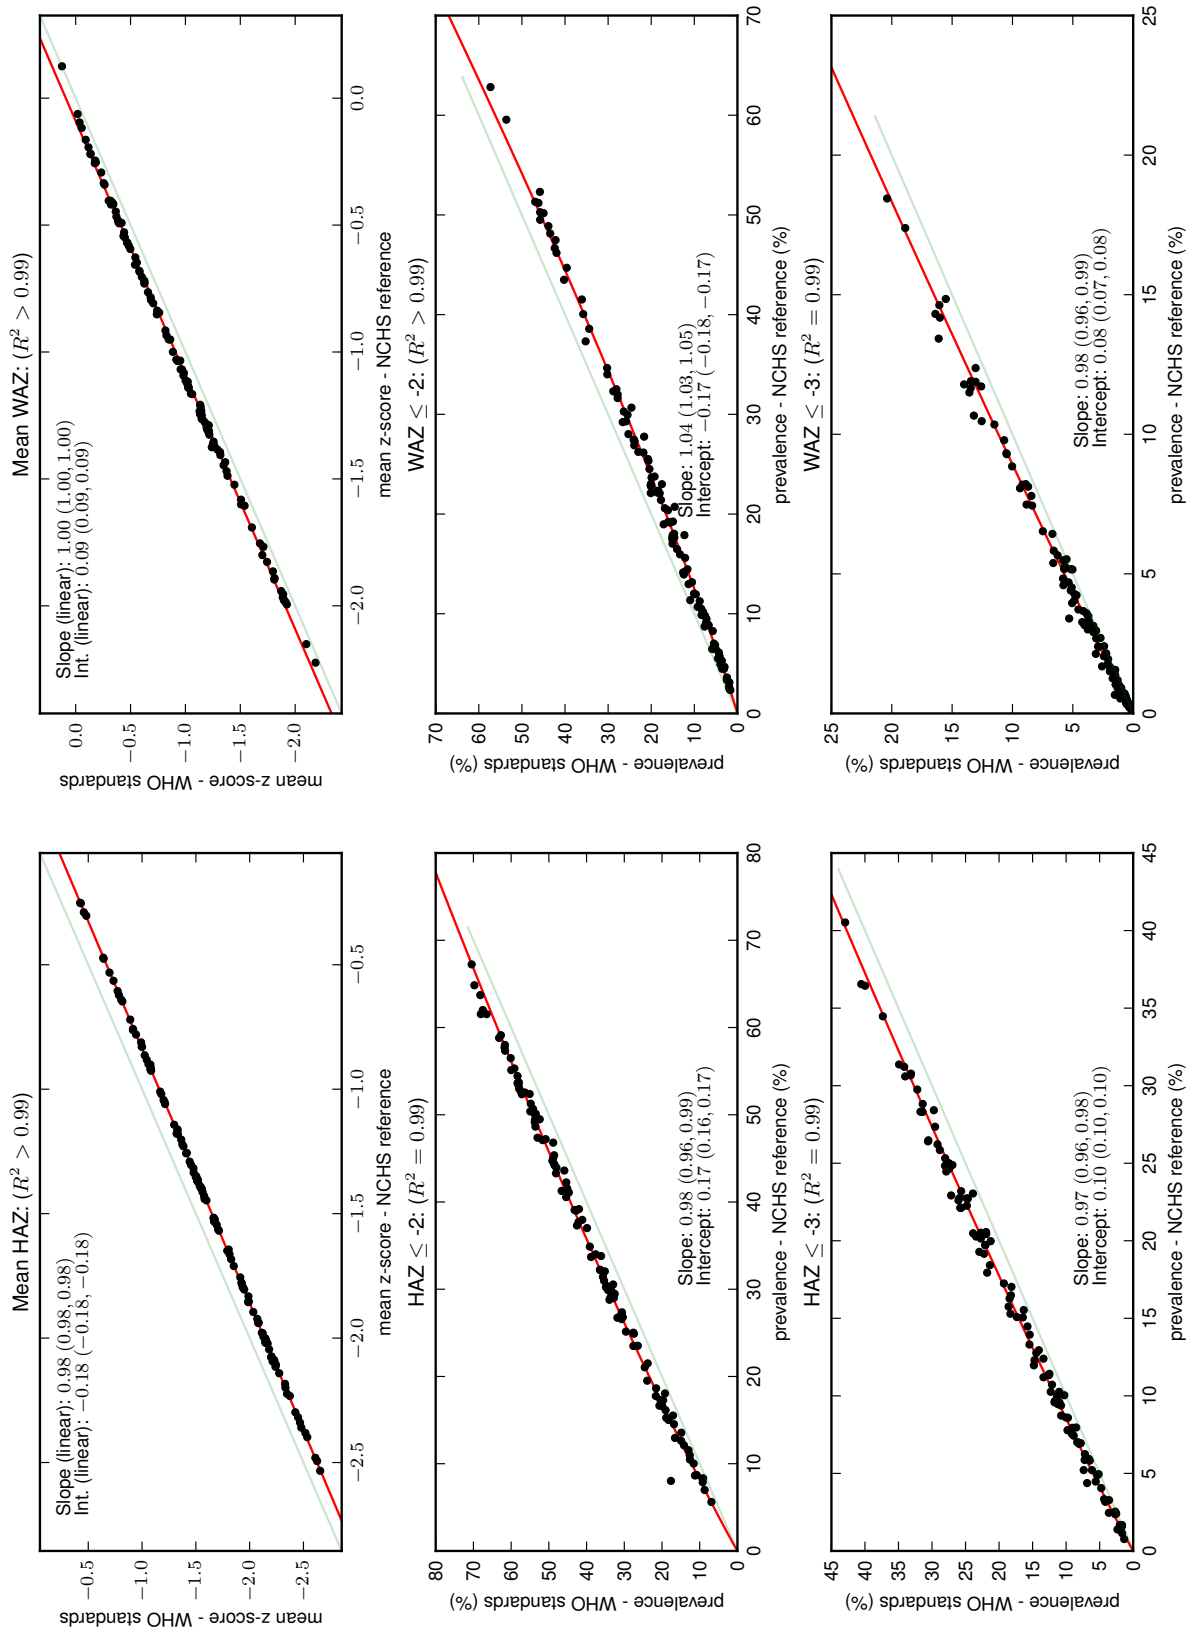

Age range: 4.00-4.99 years ( $n = 119$ ).

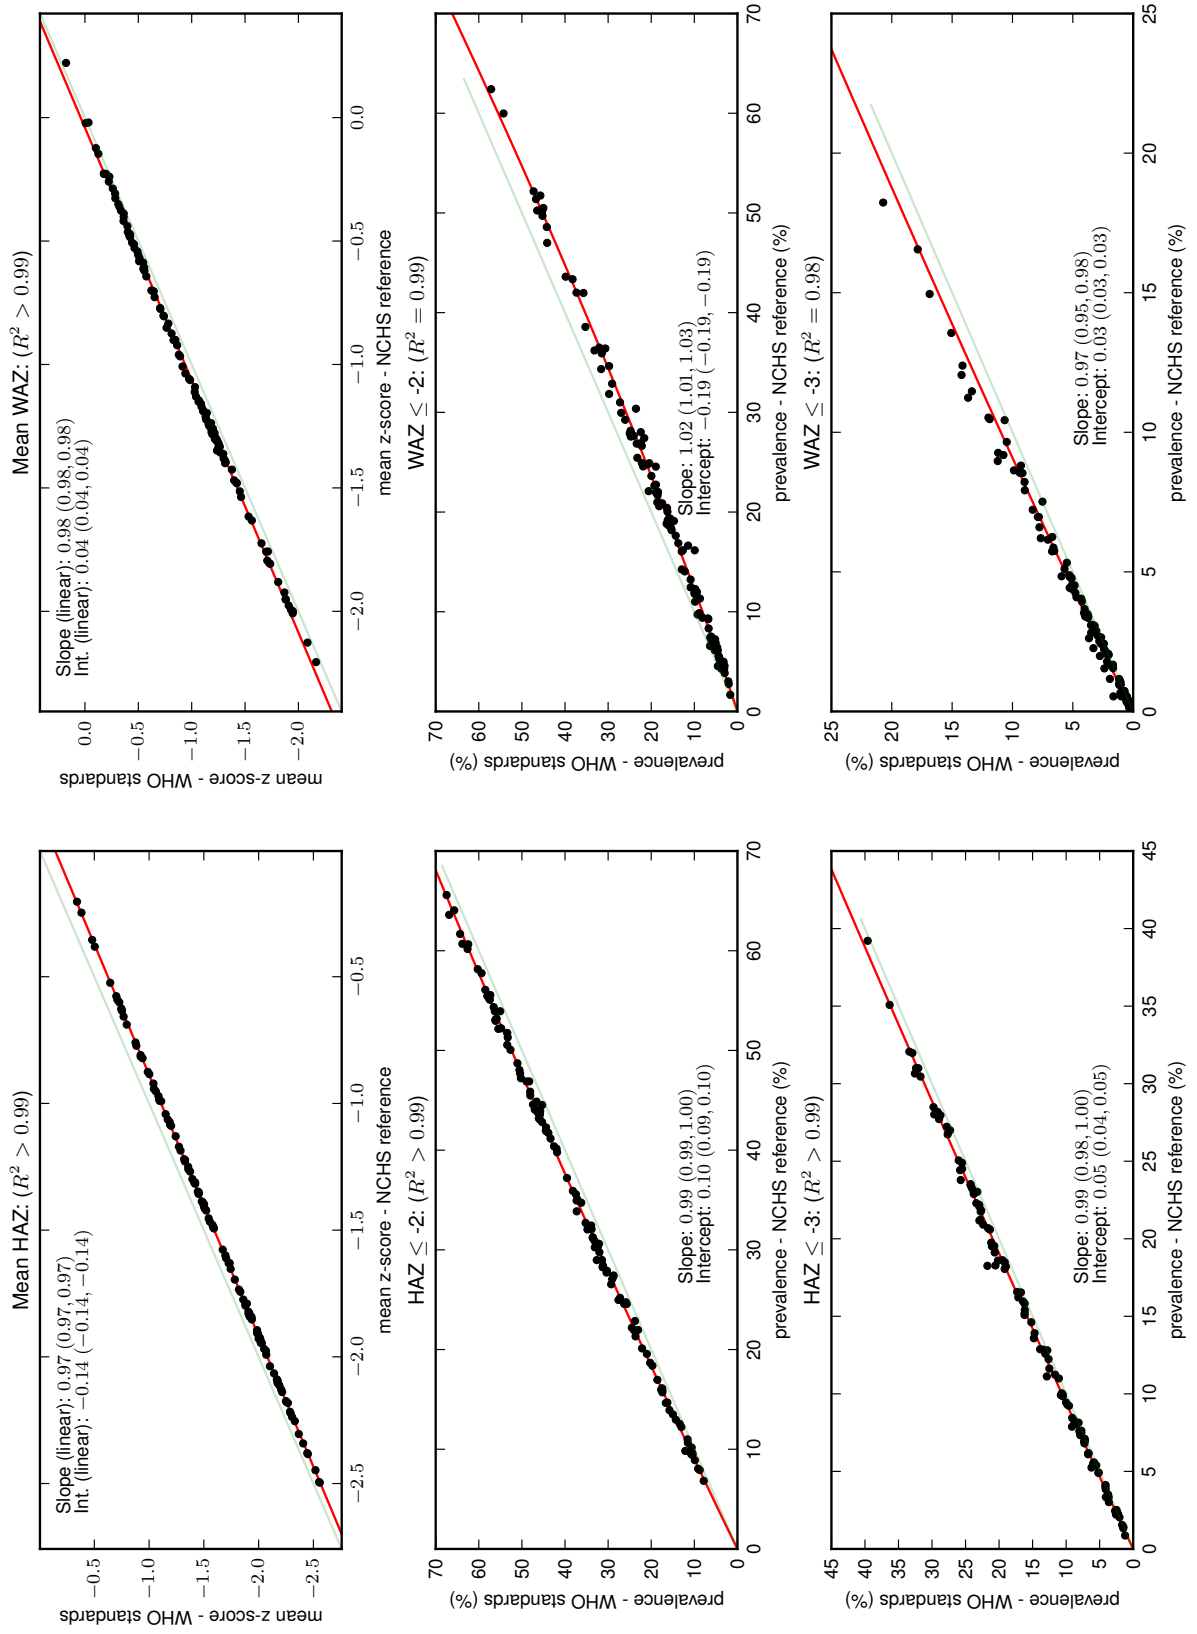

Age range: 4.50-4.99 years ( $n = 119$ )

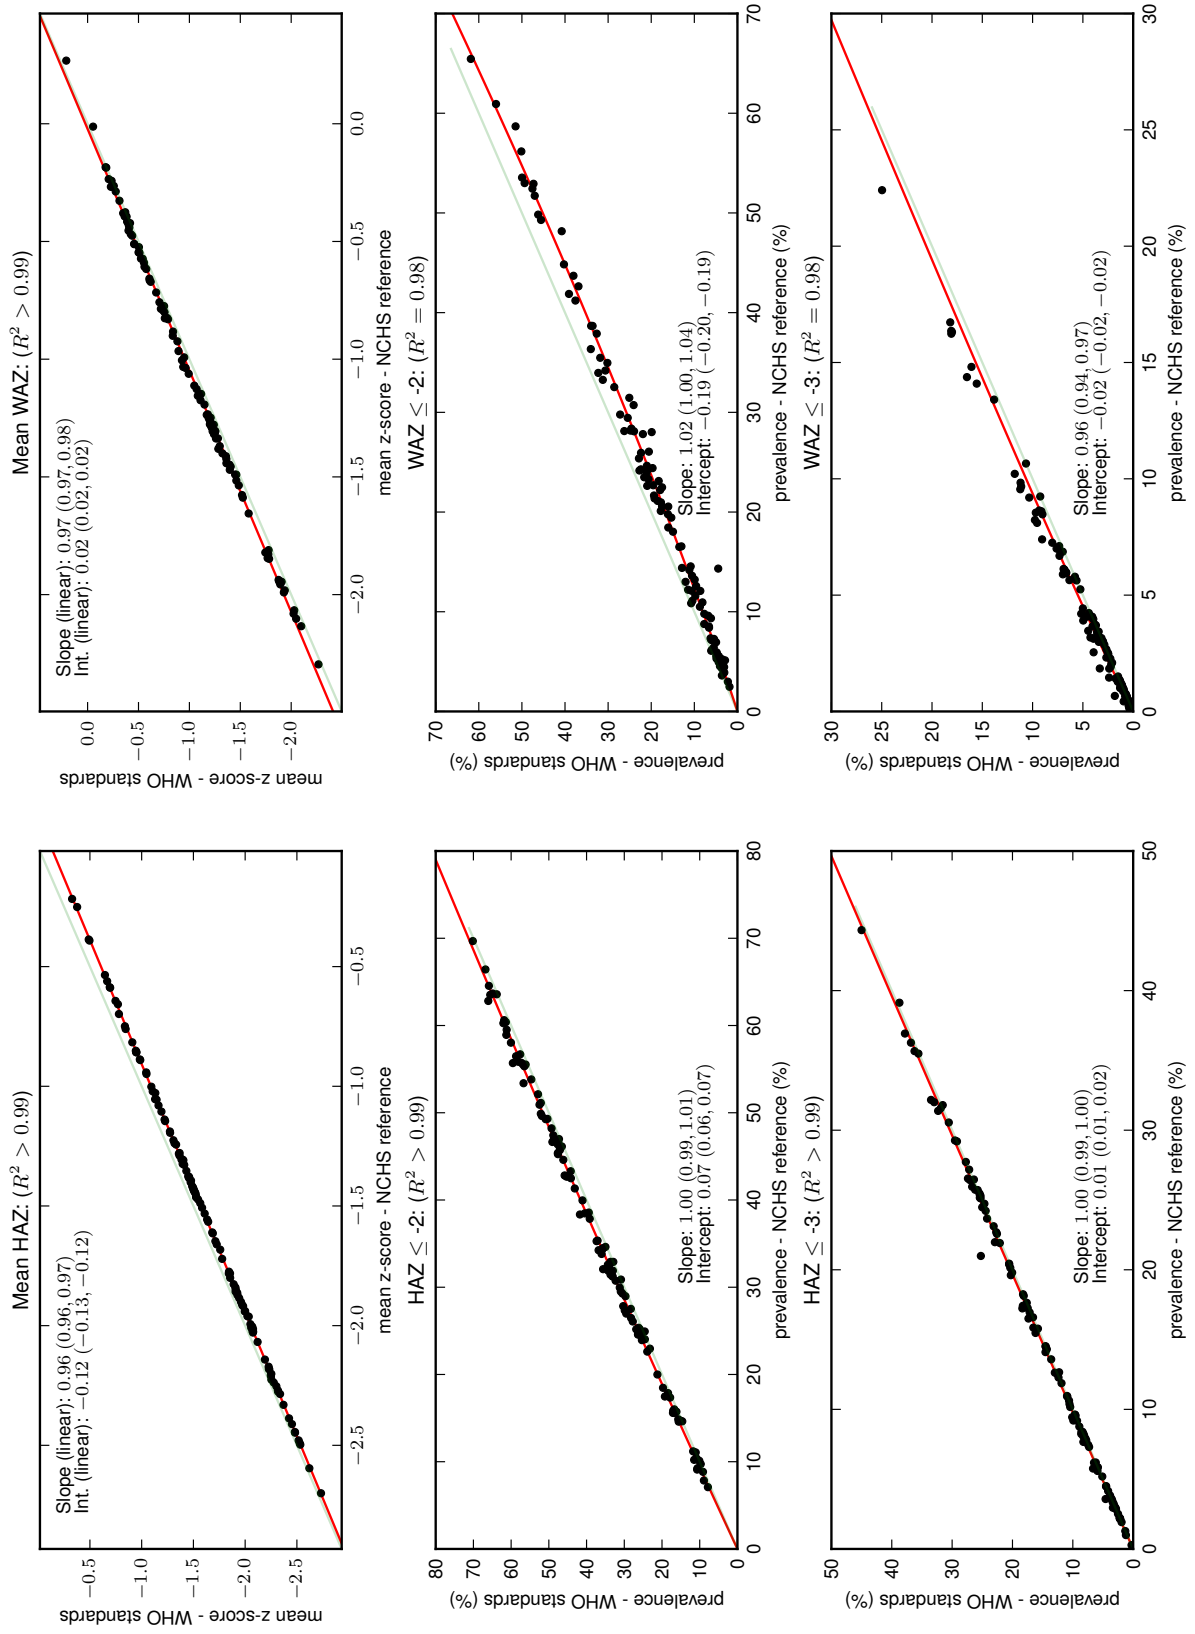

**Wefigure 2. The relationship between male and female HAZ and WAZ.**

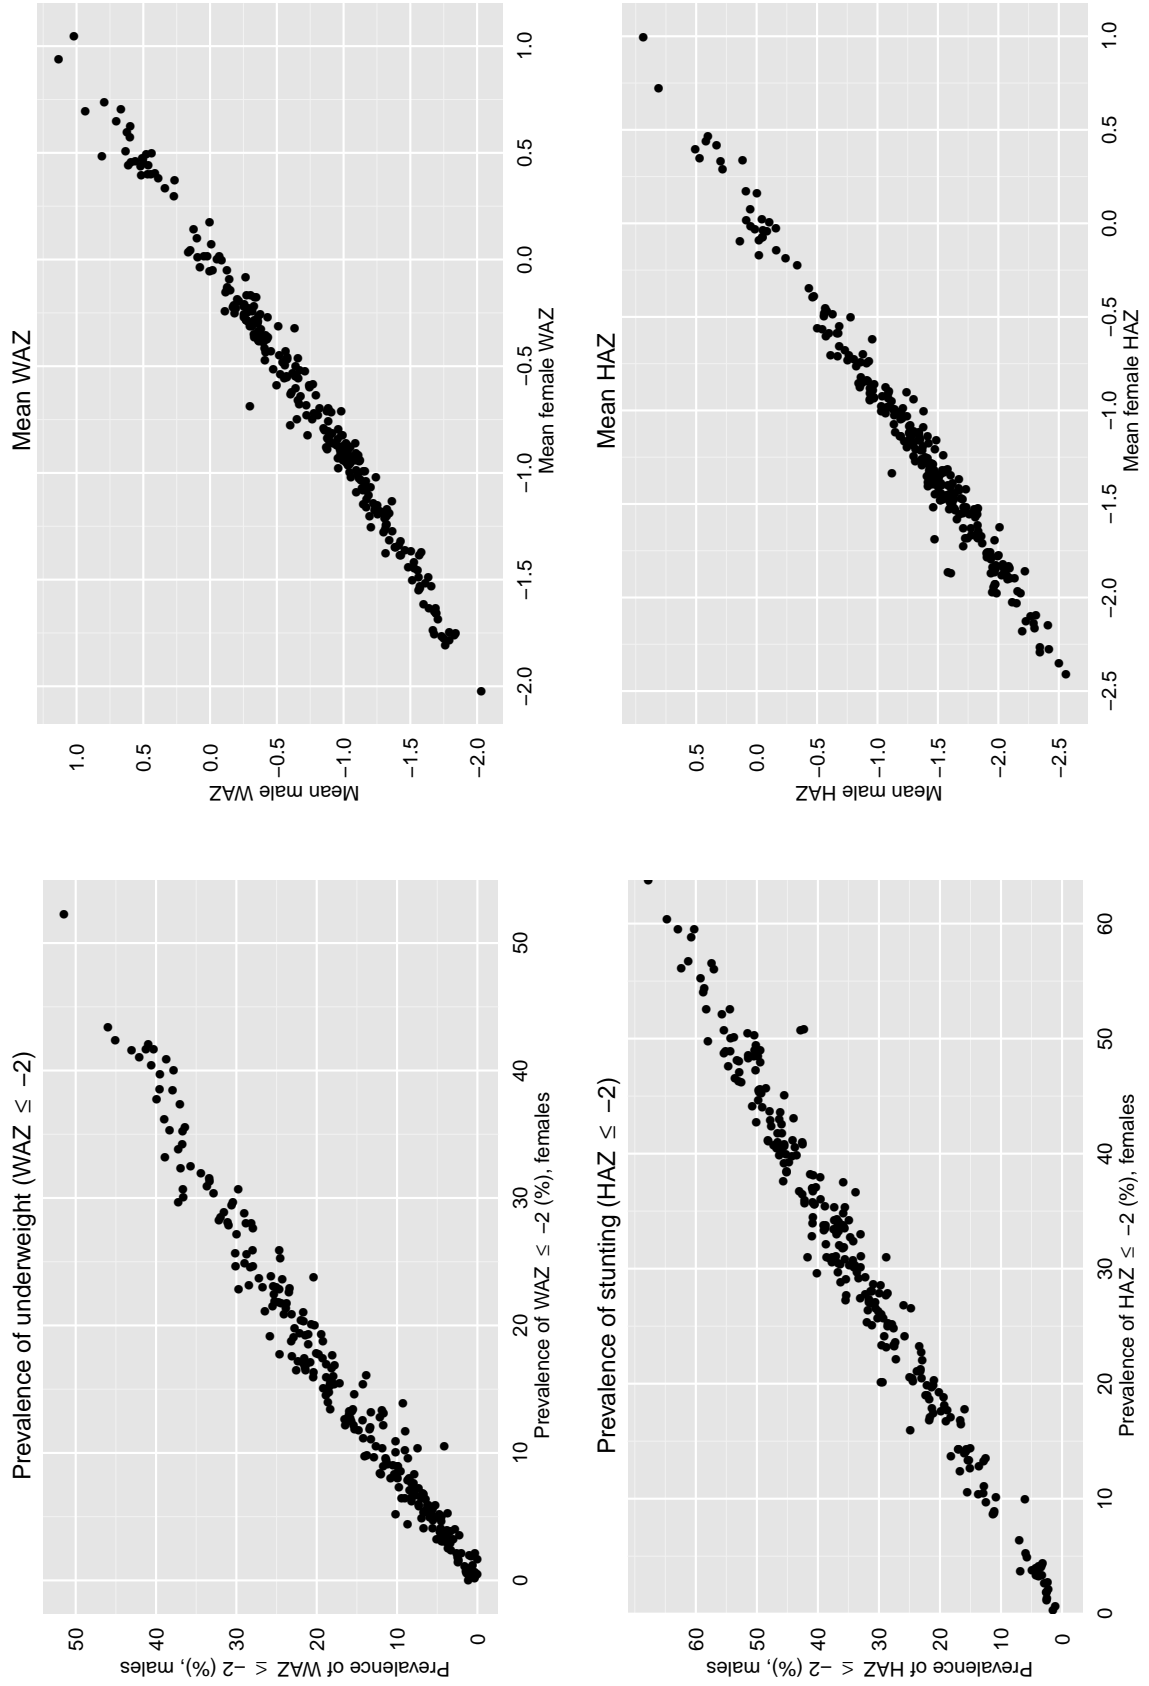

Webfigure 3. Number of data sources by year, region, and representativeness.

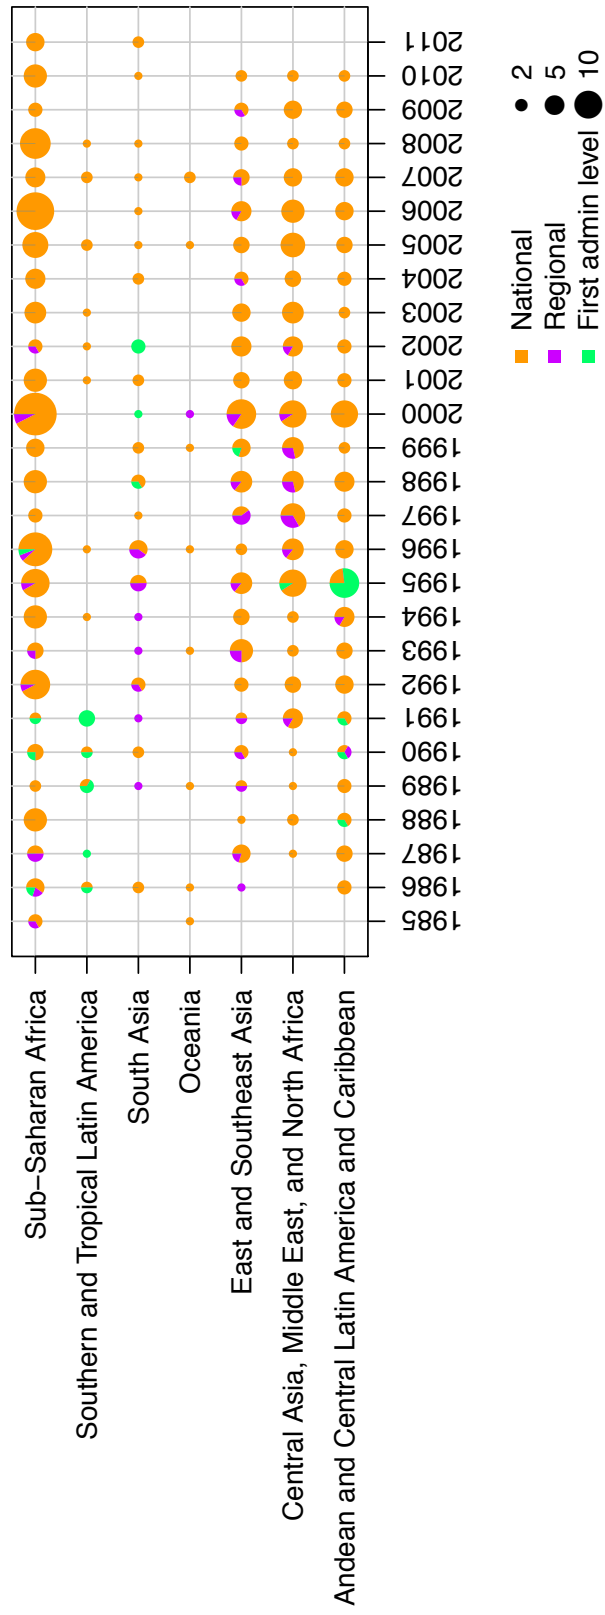



**Webfigure 4a: HAZ means and prevalences by country in 1985. Countries are ordered according to their means. See Figure 5 for 2011 estimates and Webfigure 5 for trends by country.**

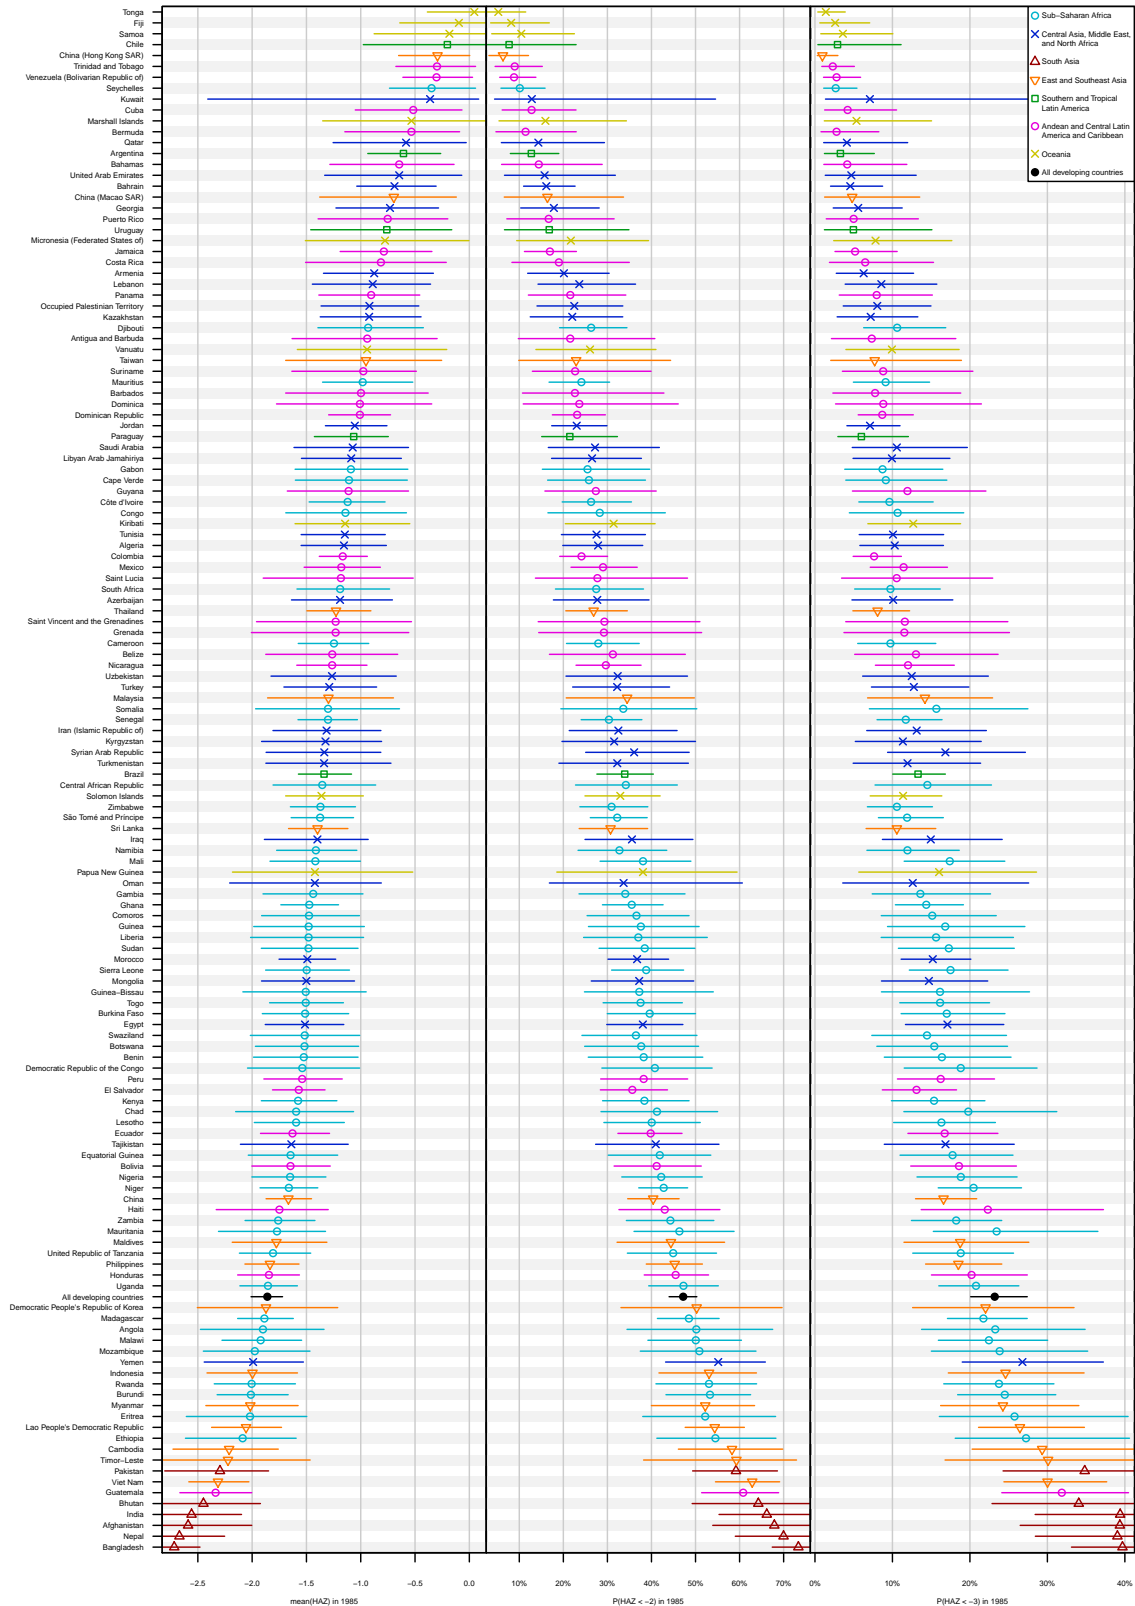

**Webfigure 4b: WAZ means and prevalences by country in 1985. Countries are ordered according to their means. See Figure 5 for 2011 estimates and Webfigure 5 for trends by country.**

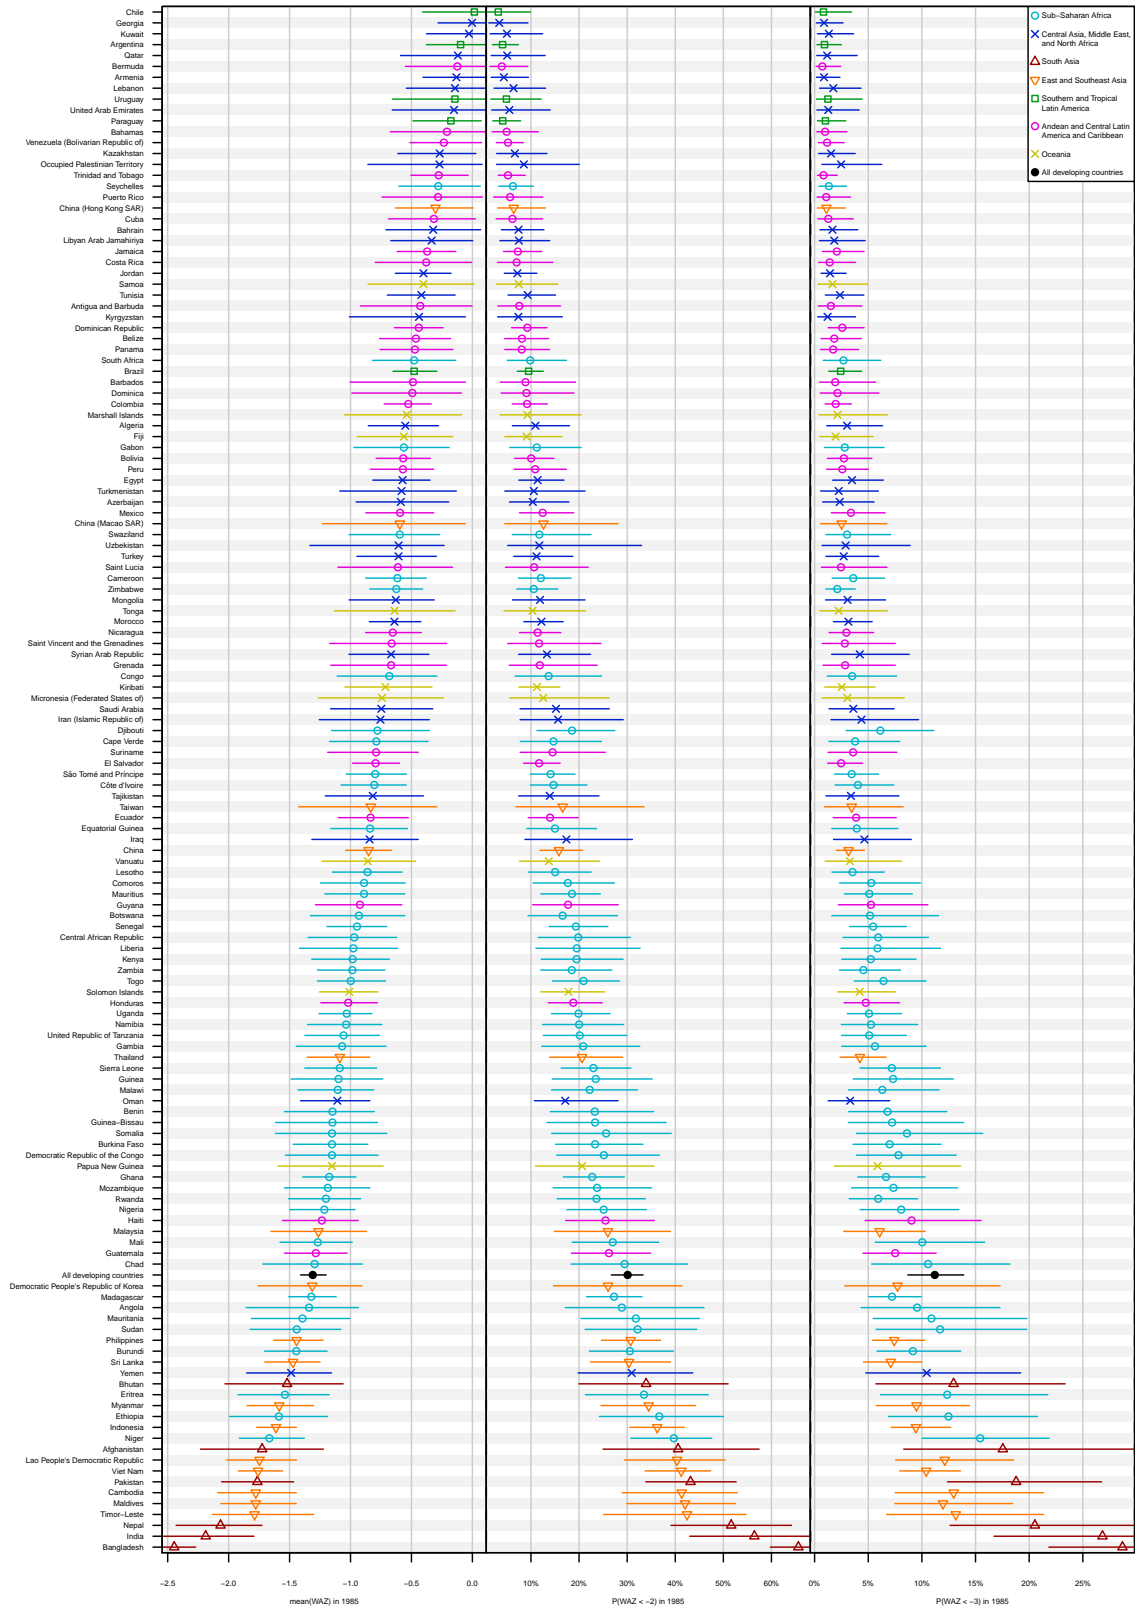

**Webfigure 5: Trends in HAZ and WAZ distributions, means and prevalences by country between 1985 and 2011 in relation to original data by country. The shaded area shows the uncertainty intervals, defined and estimated as described in Methods. (See pages 85-225.)**

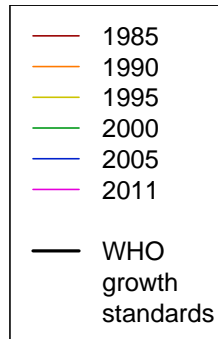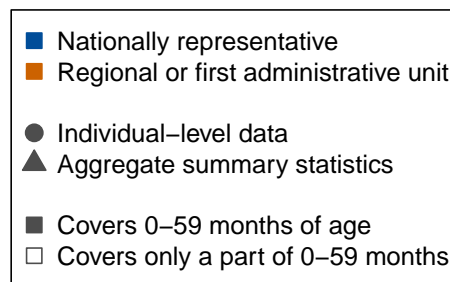

# Afghanistan

South Asia Region

### HAZ

### WAZ

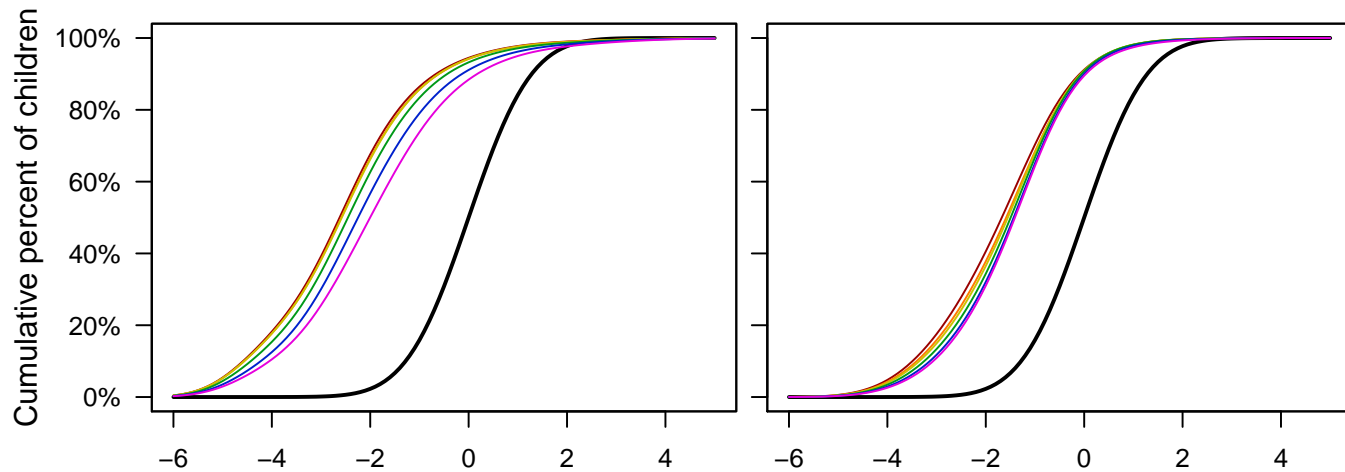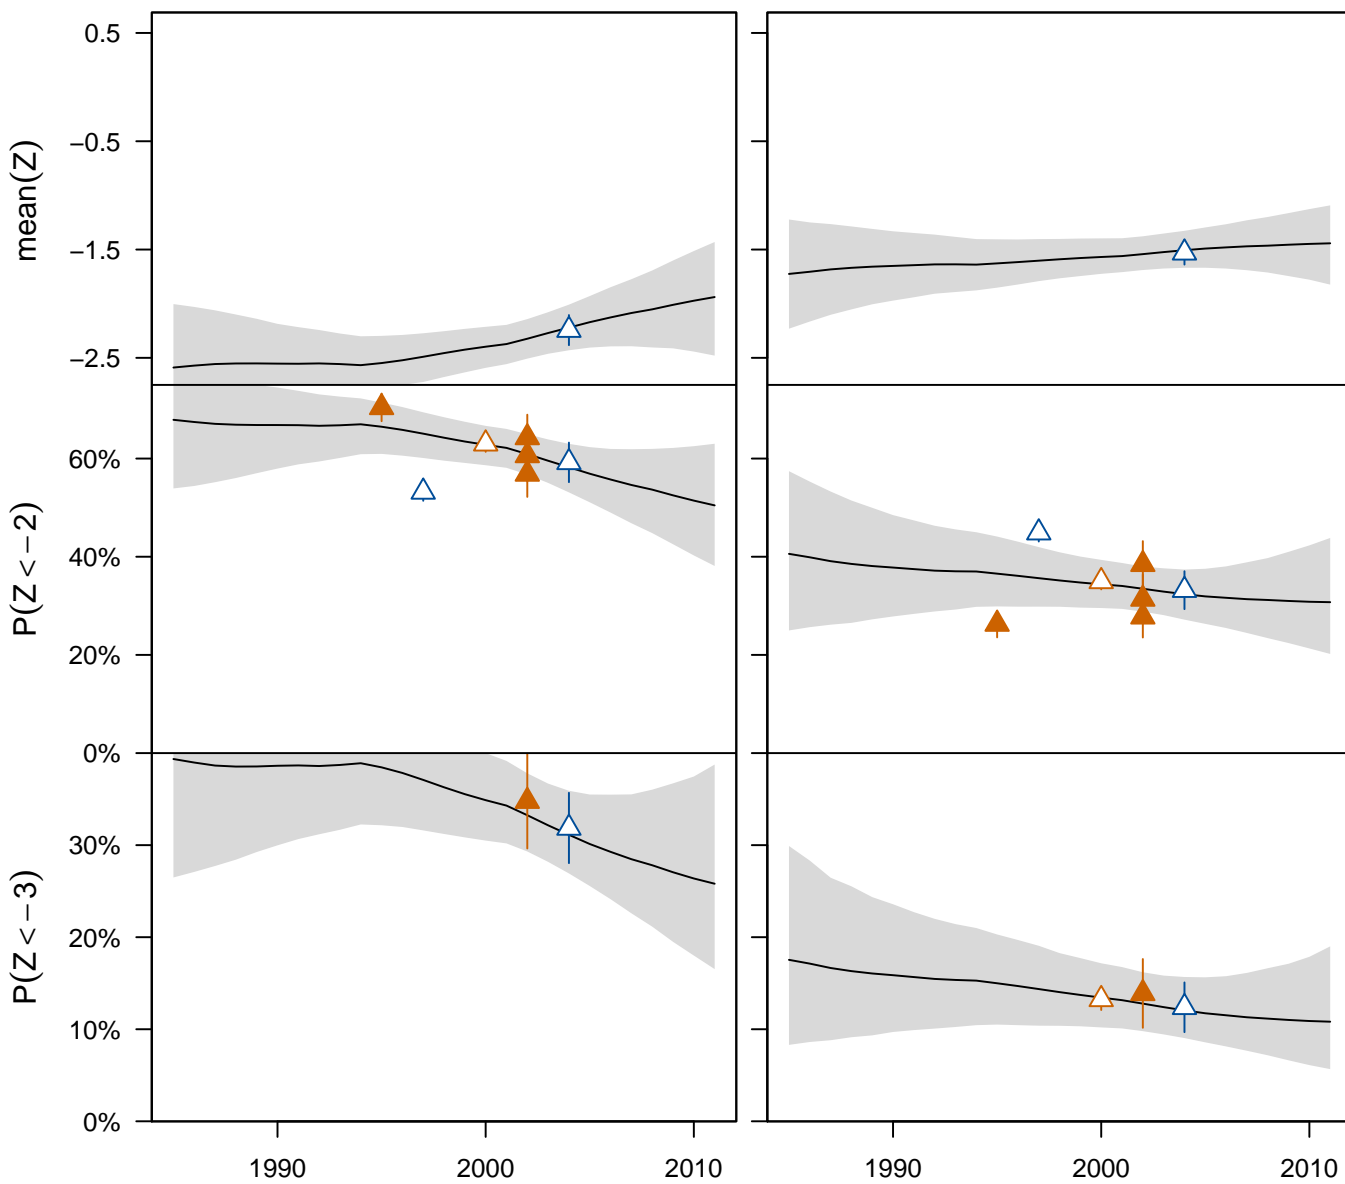

# Algeria

Central Asia, Middle East, and North Africa Region

HAZ

WAZ

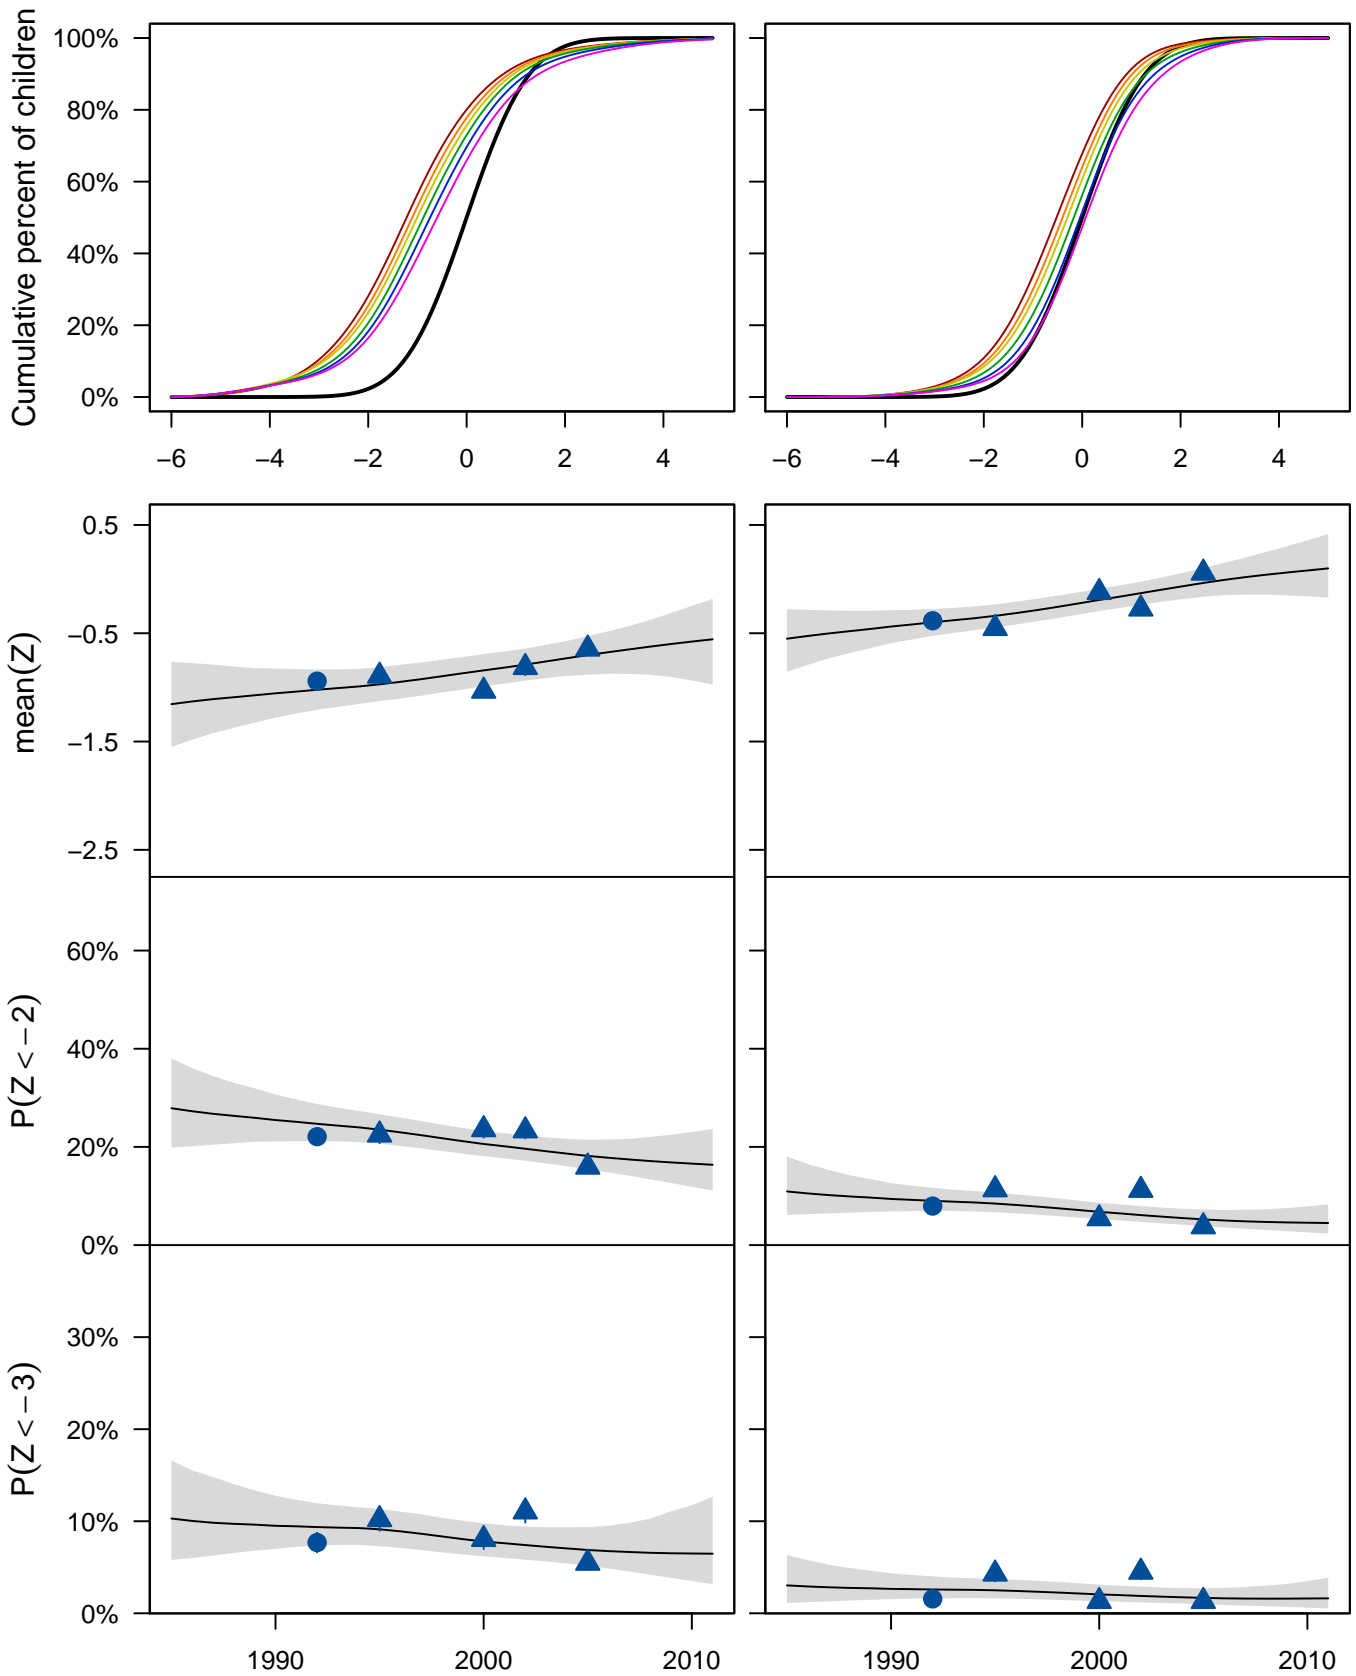

# Angola

## Sub-Saharan Africa Region

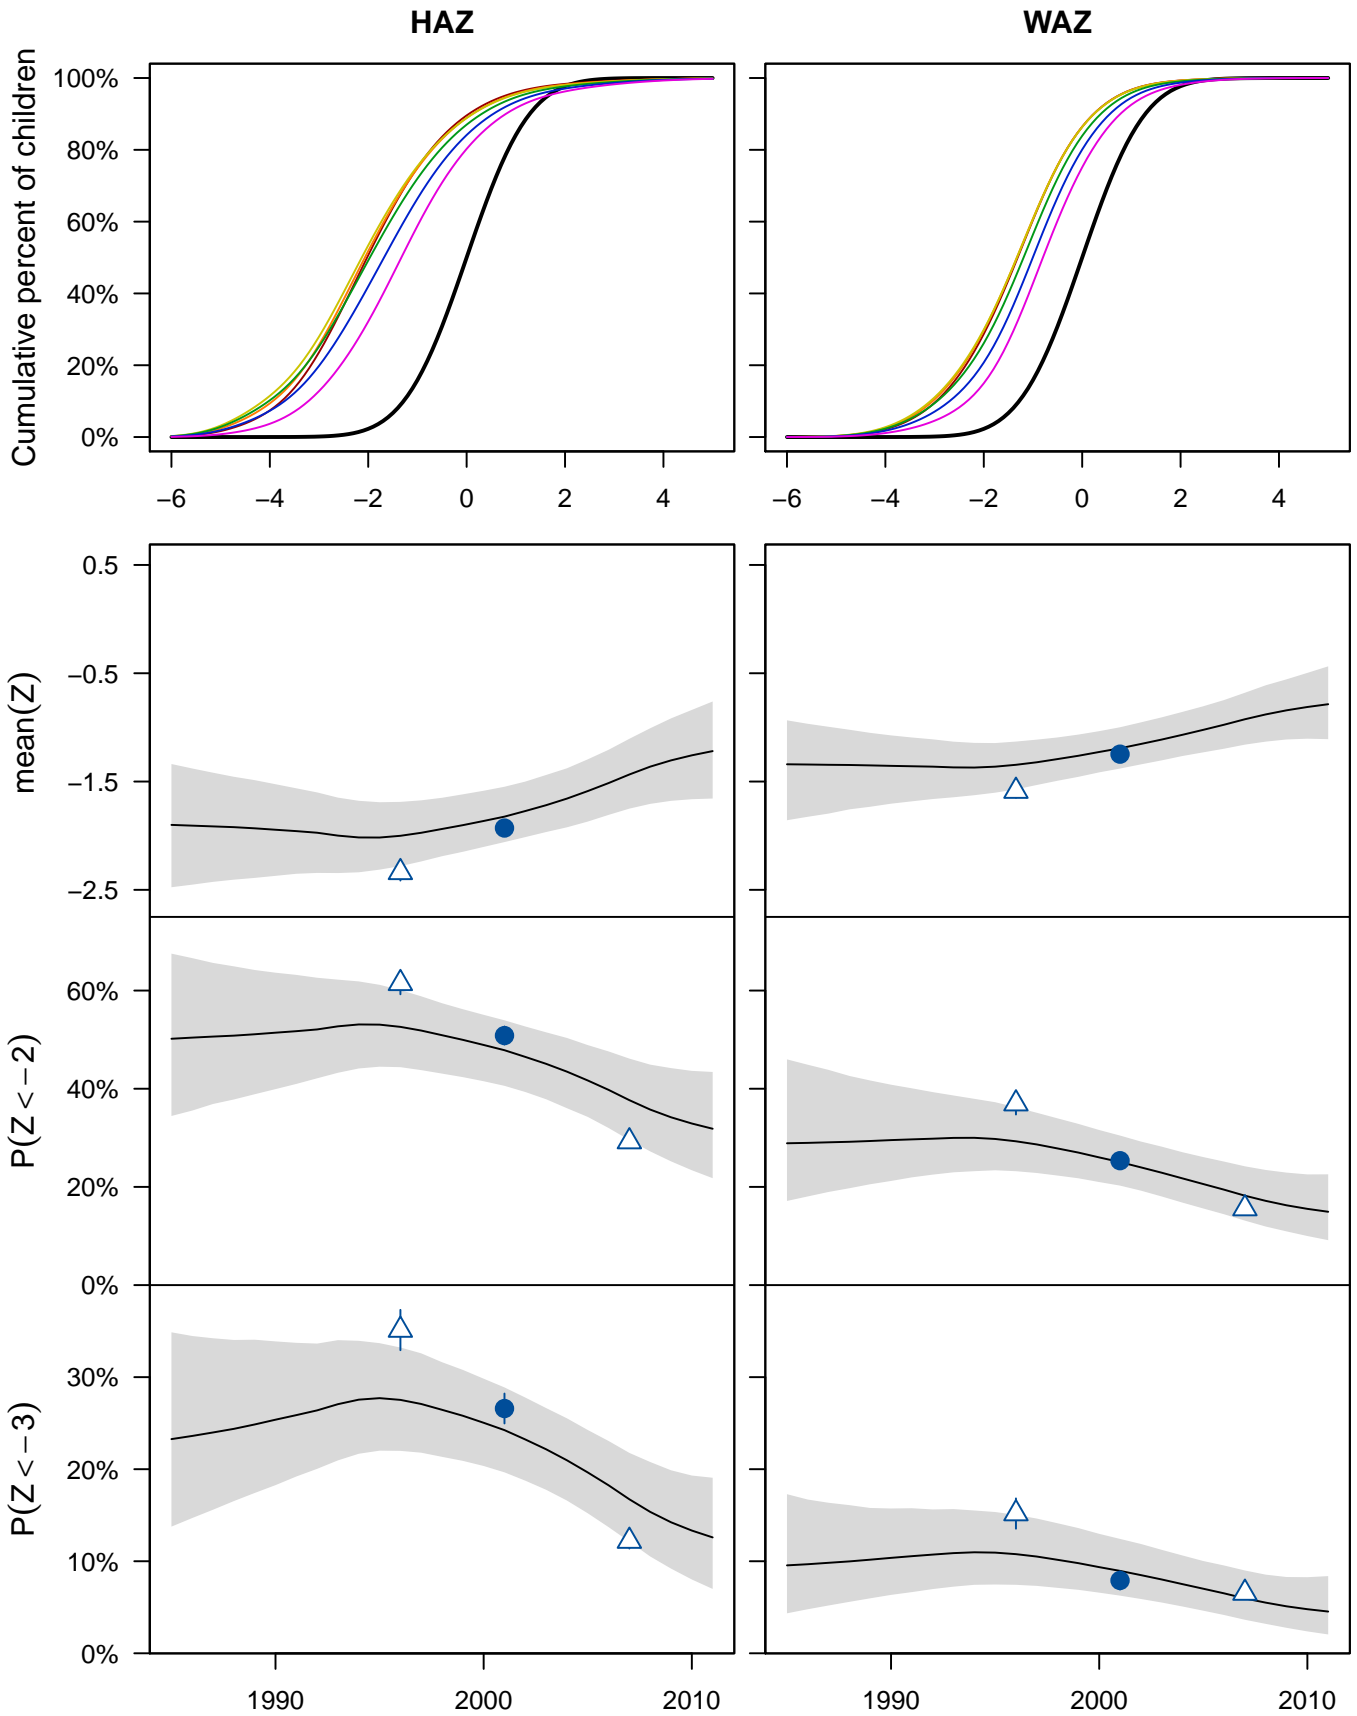

# Antigua and Barbuda

Andean and Central Latin America and Caribbean Region

HAZ

WAZ

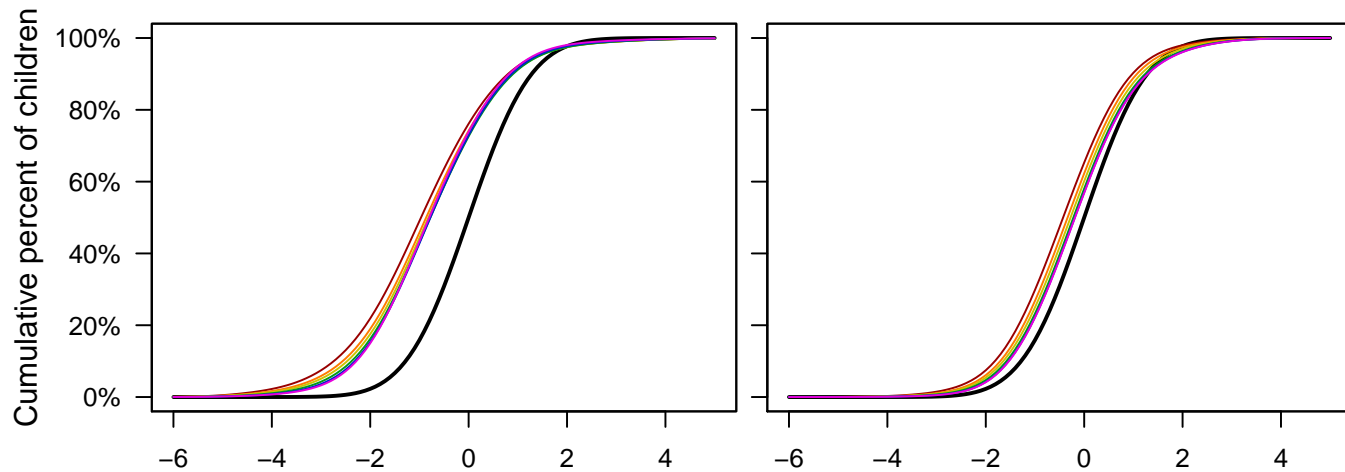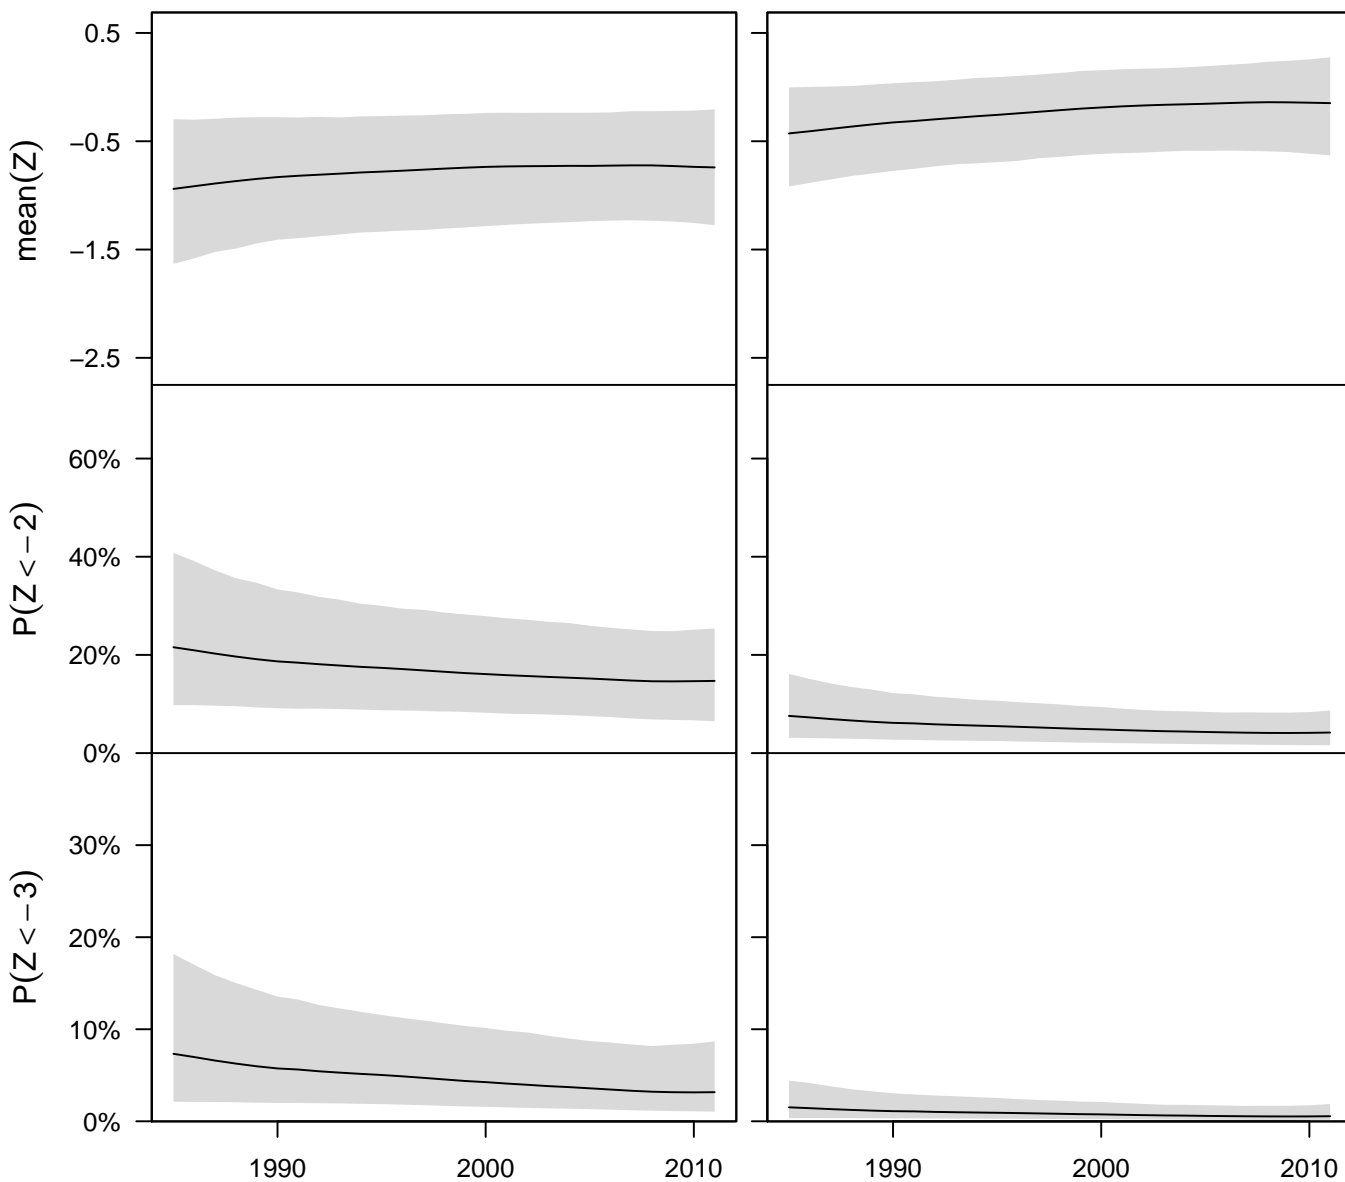

# Argentina

Southern and Tropical Latin America Region

HAZ

WAZ

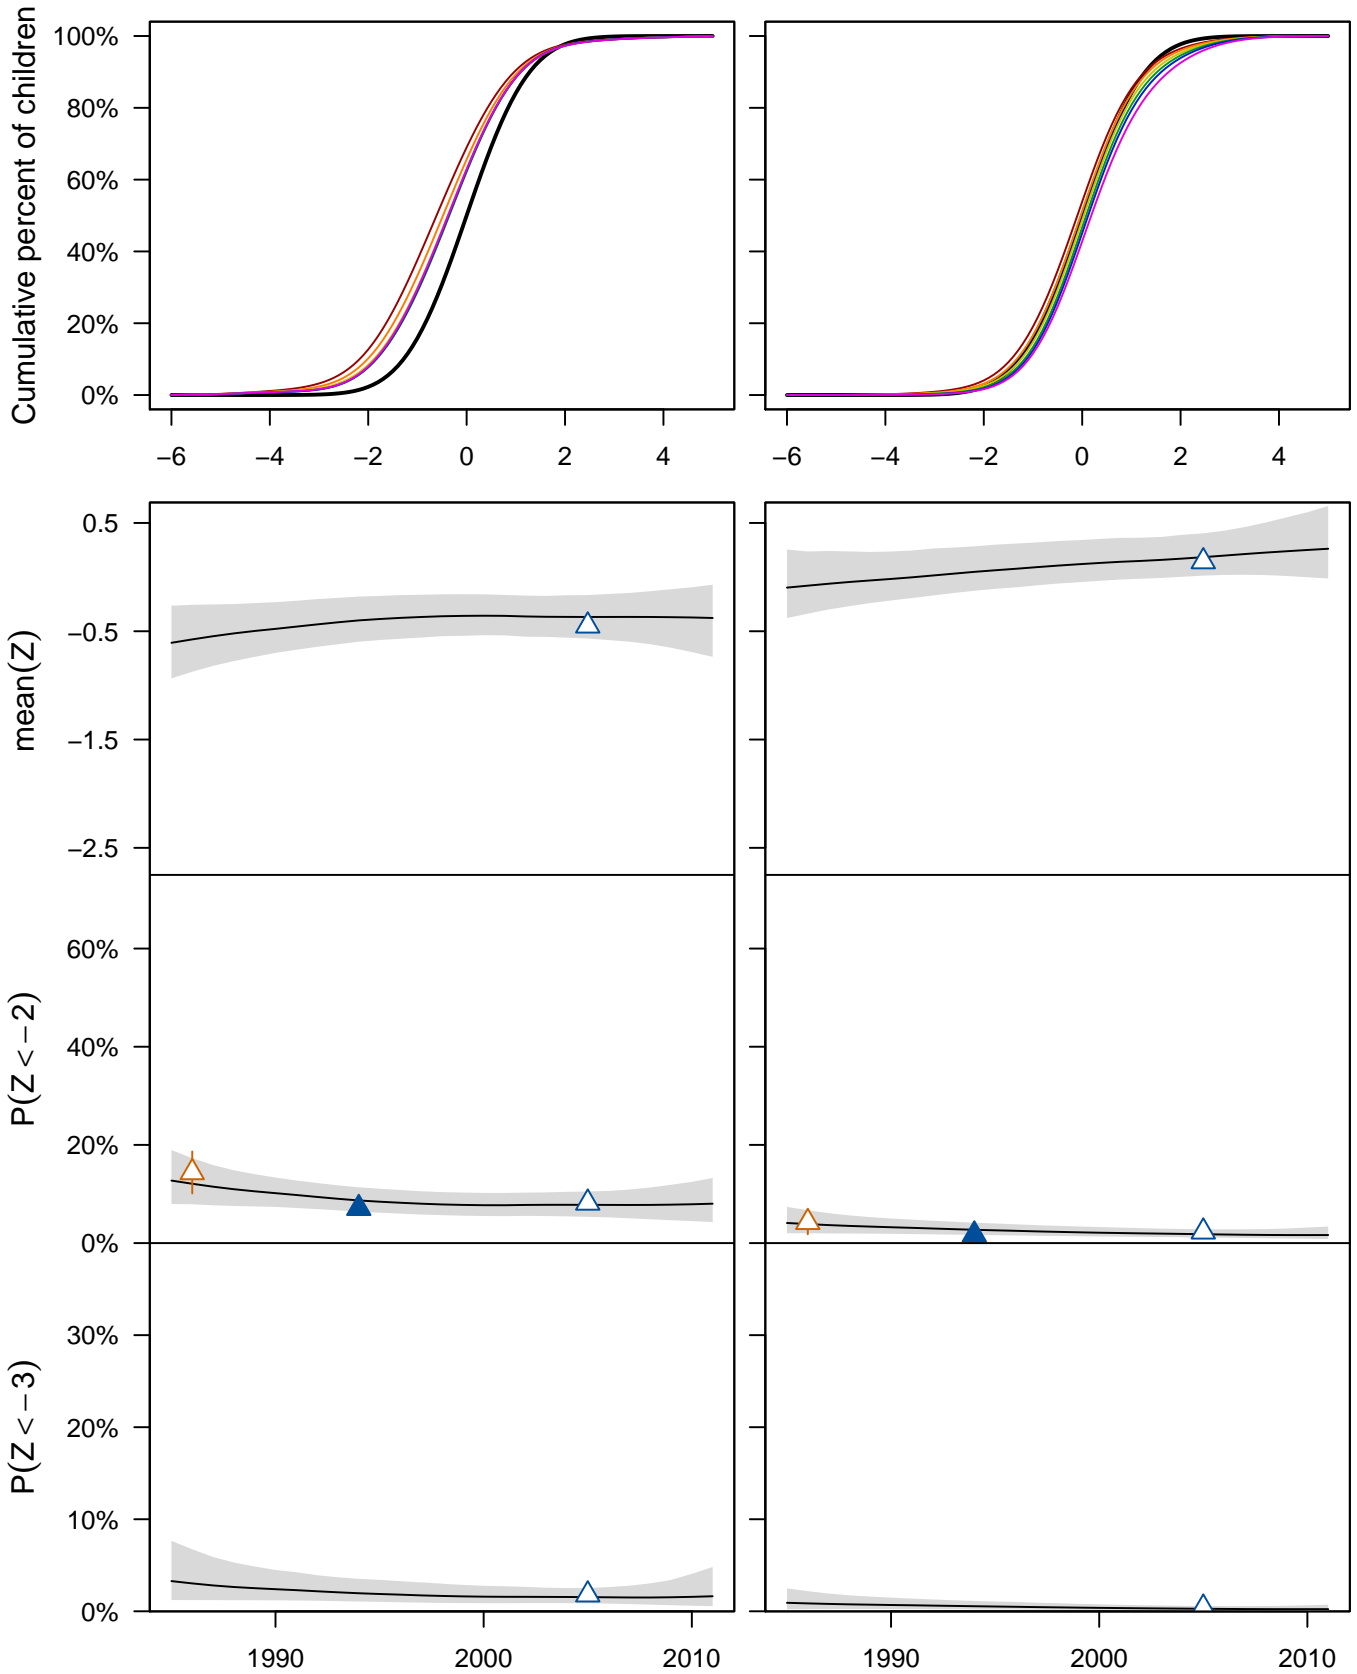



# Armenia

Central Asia, Middle East, and North Africa Region

HAZ

WAZ

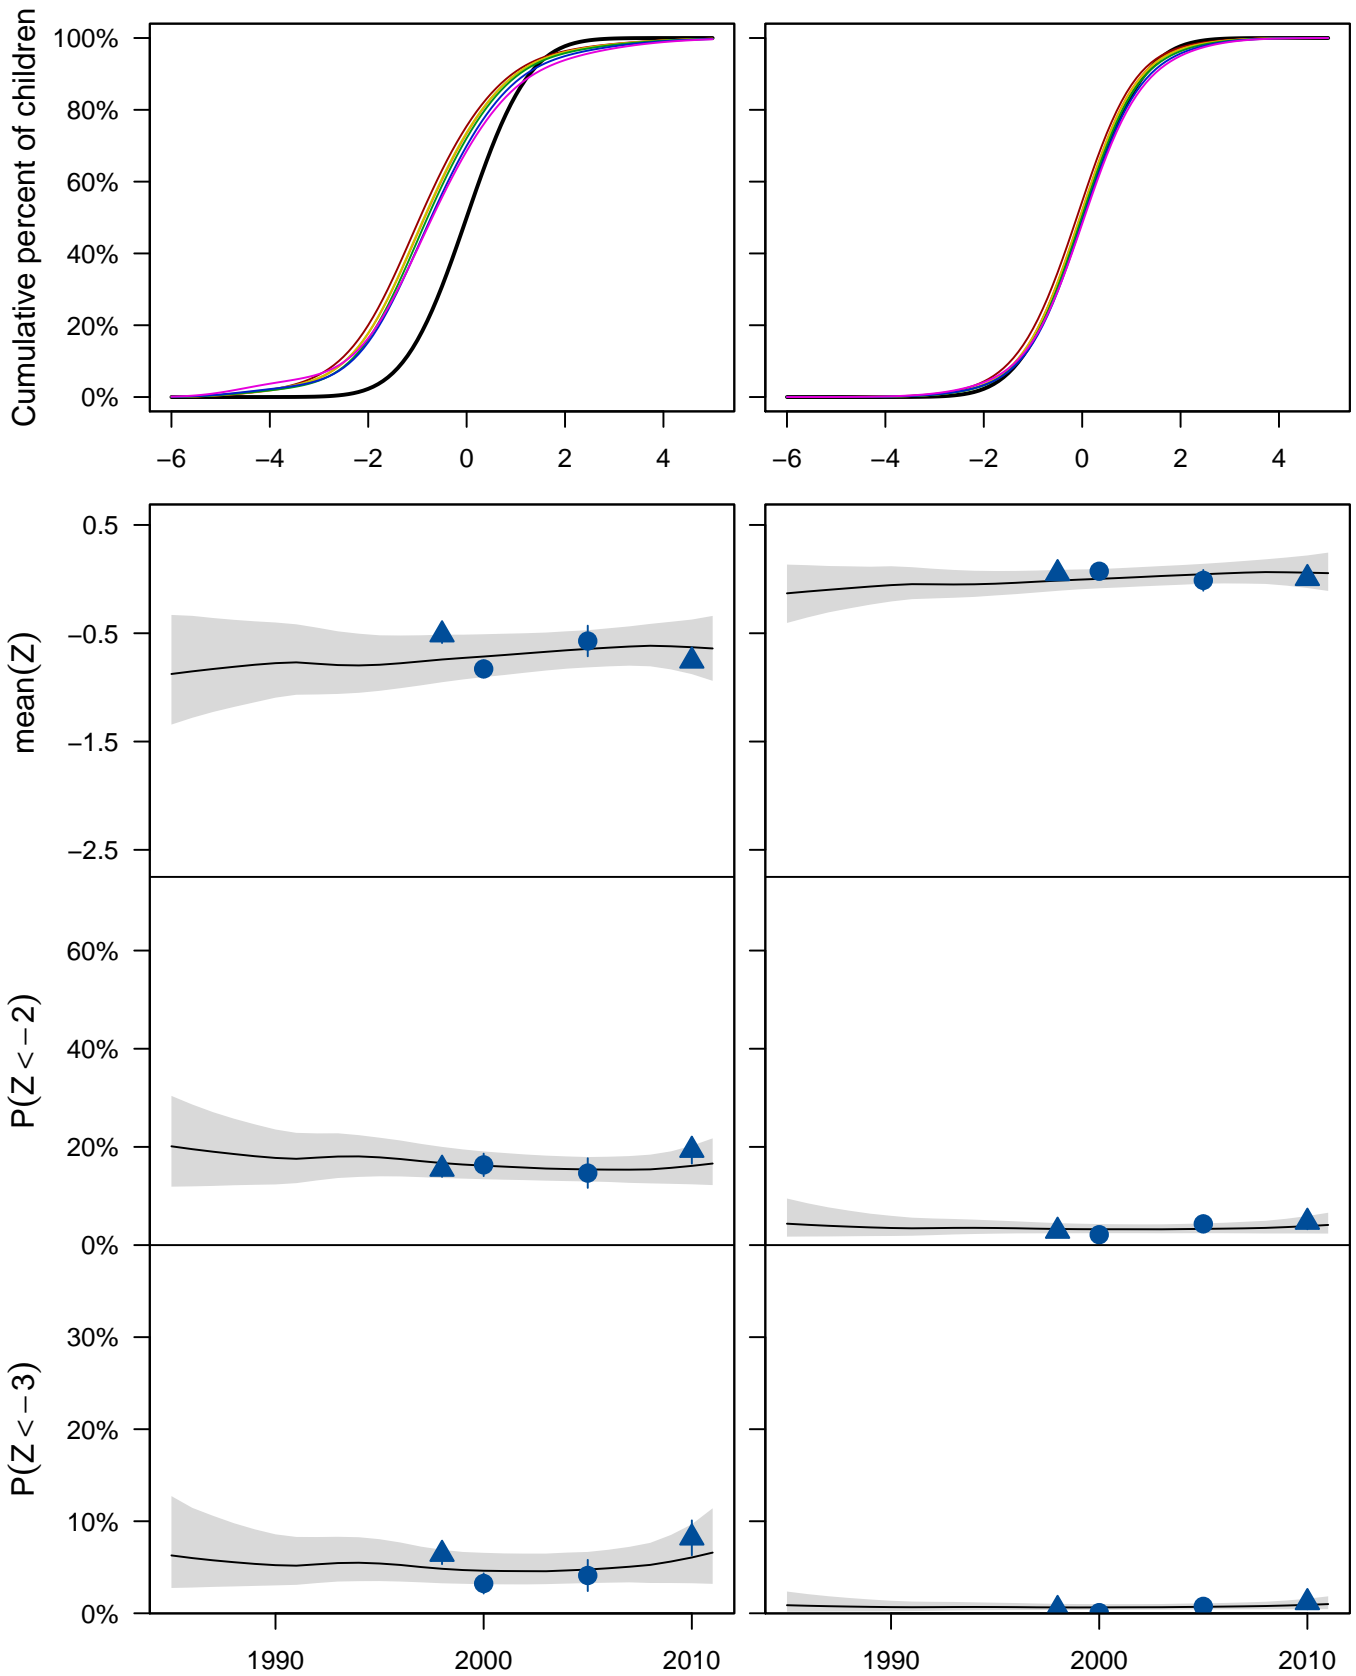

# Azerbaijan

Central Asia, Middle East, and North Africa Region

HAZ

WAZ

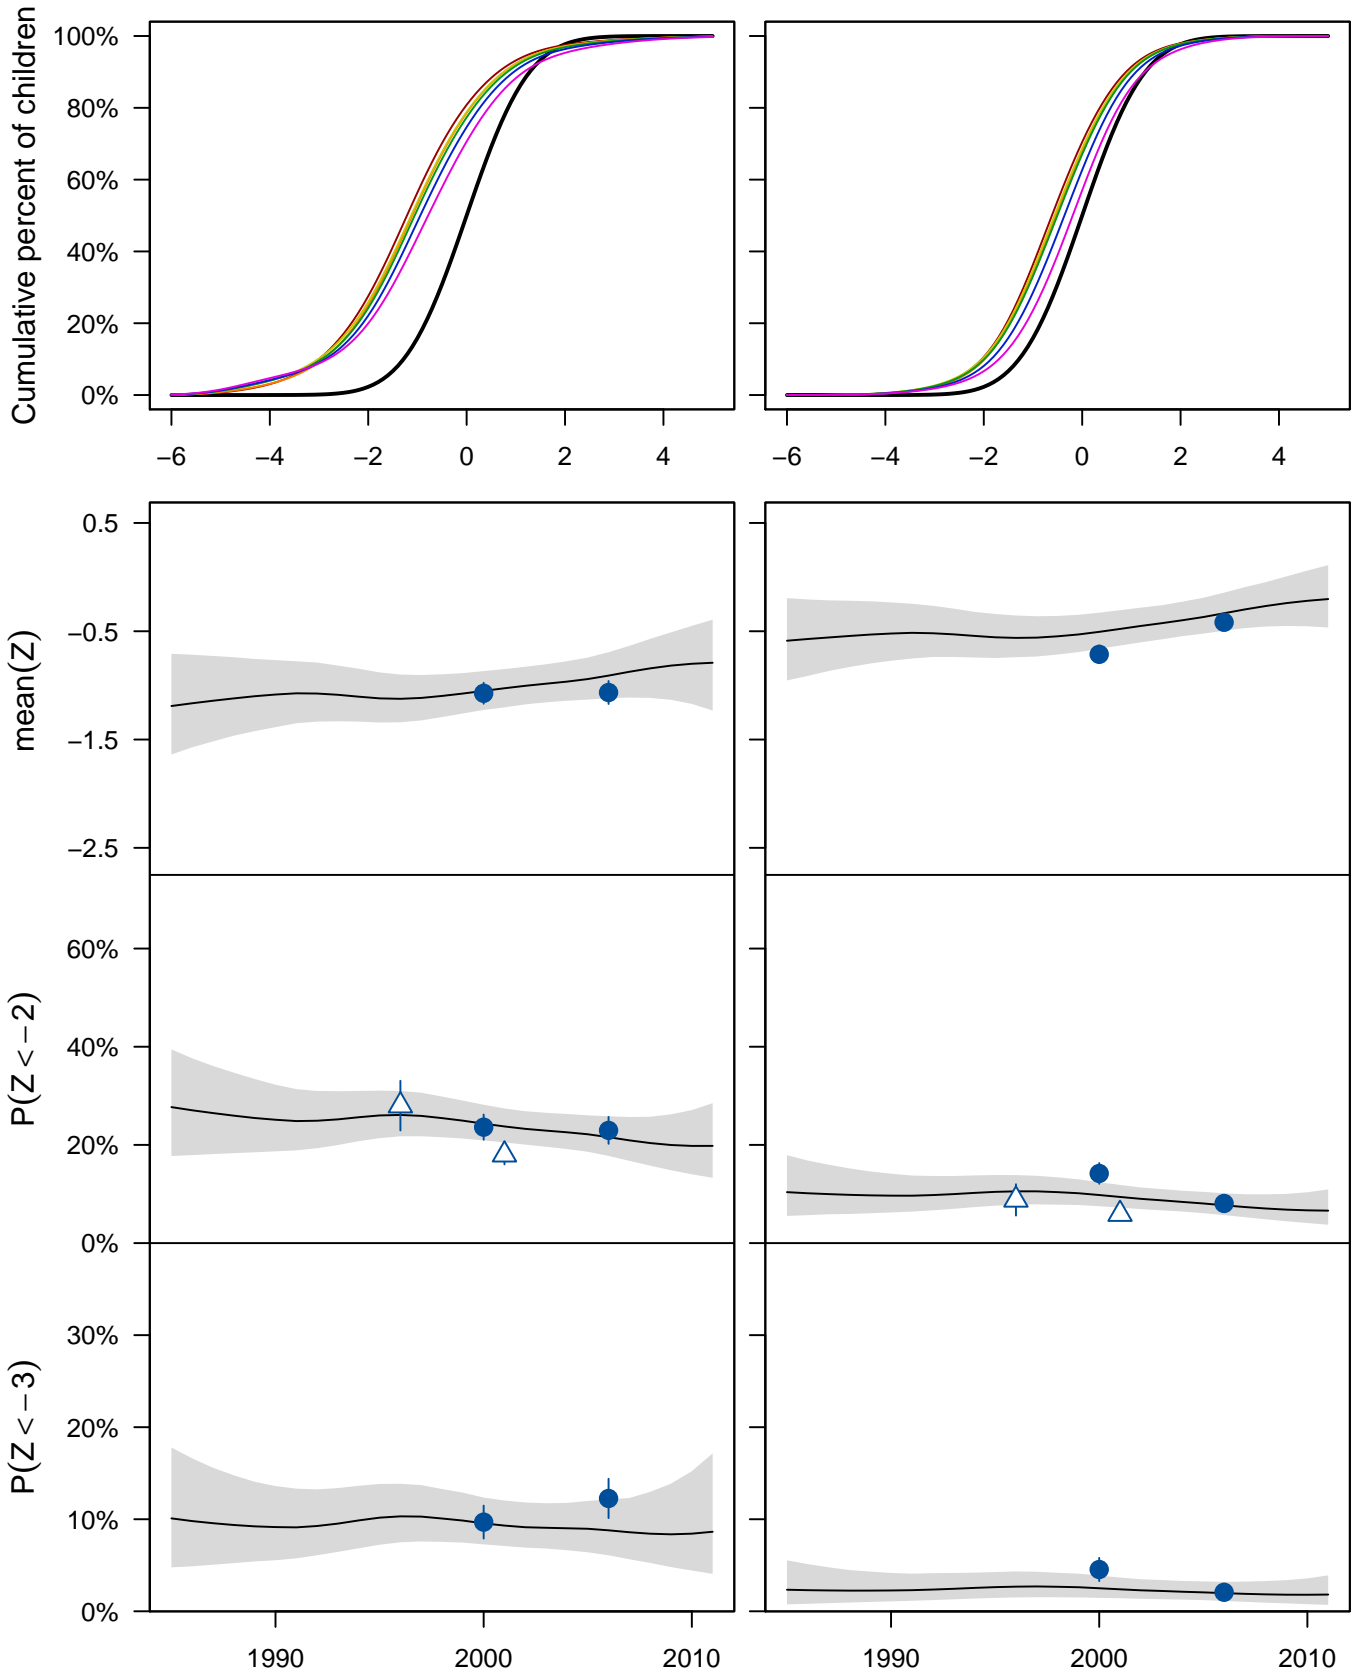

# Bahamas

Andean and Central Latin America and Caribbean Region

HAZ

WAZ

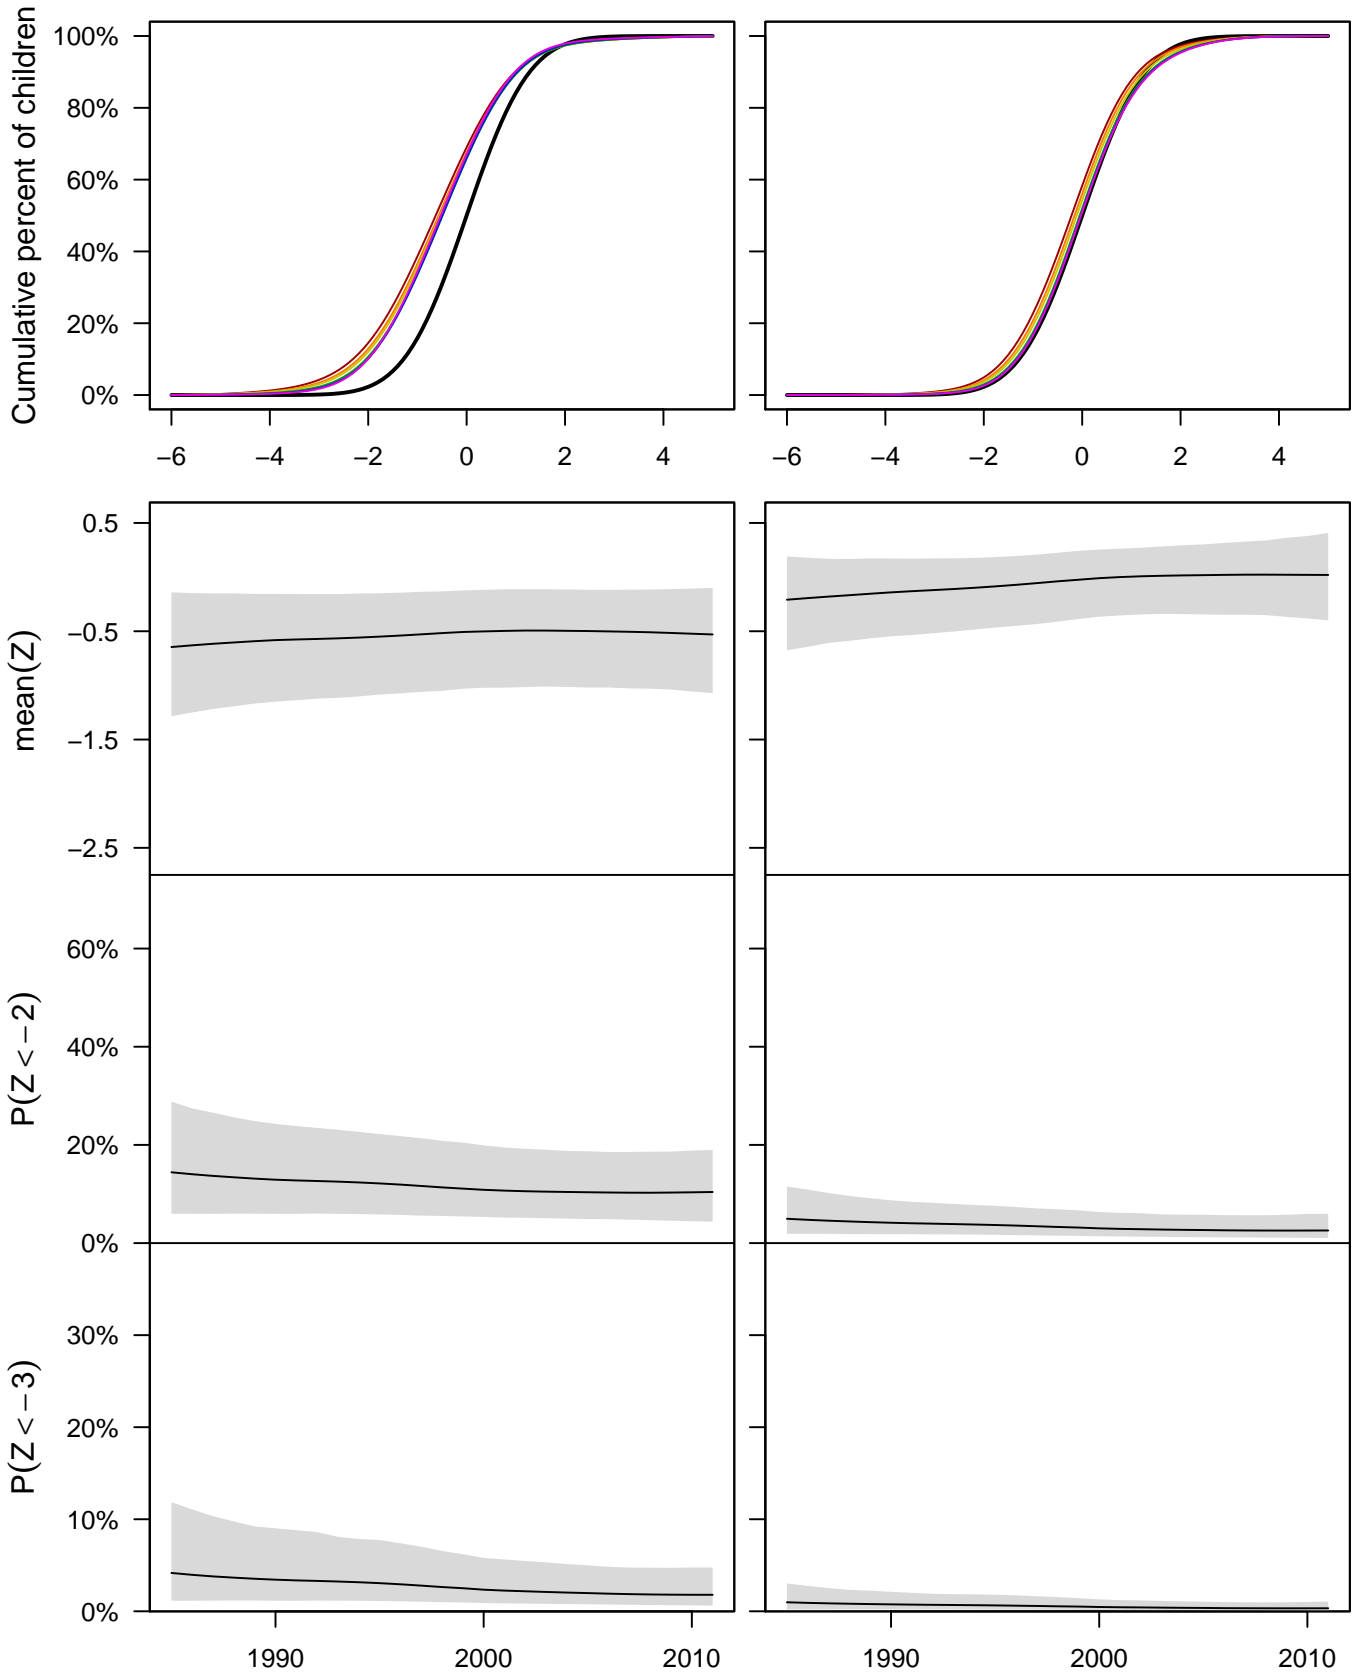

# Bahrain

Central Asia, Middle East, and North Africa Region

HAZ

WAZ

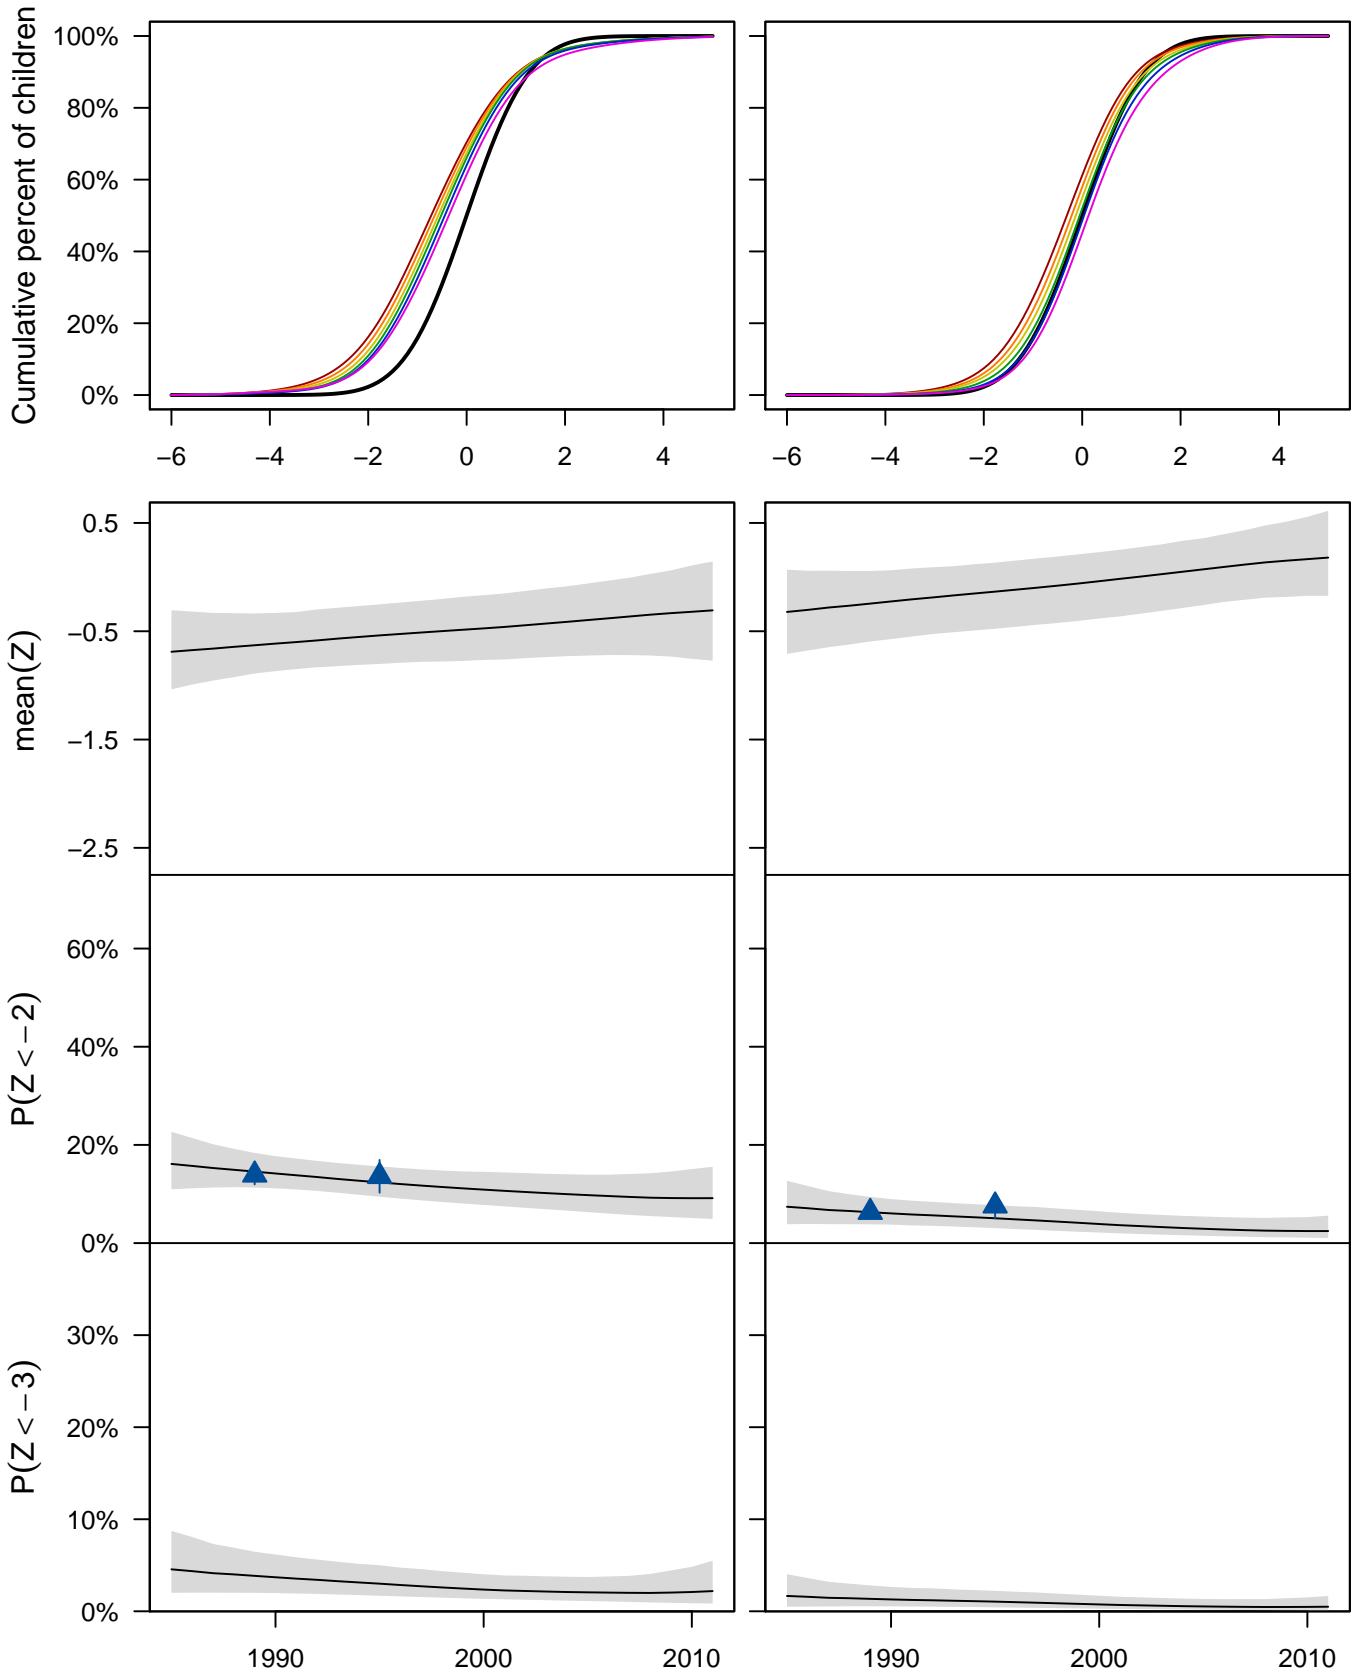

# Bangladesh

South Asia Region

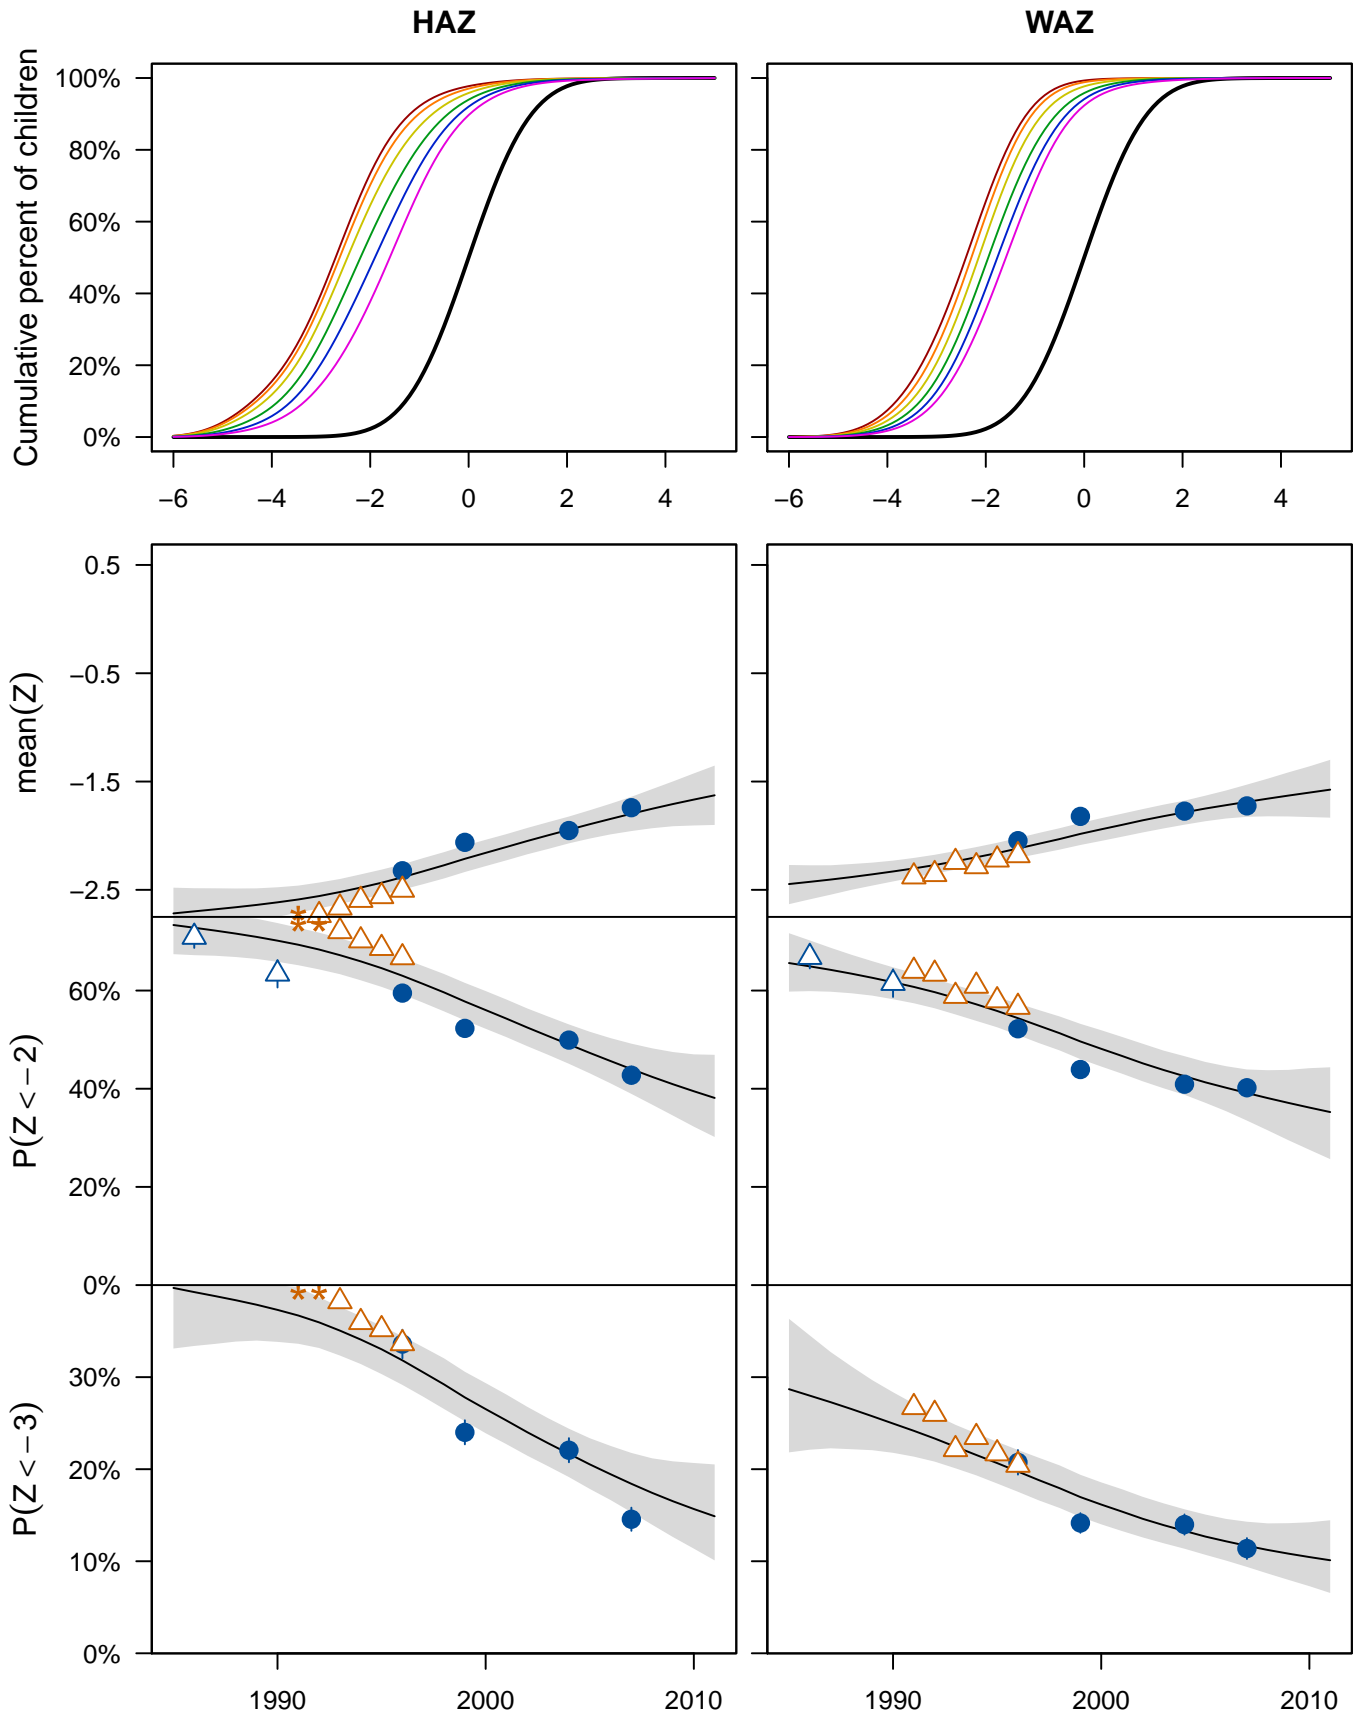

# Barbados

Andean and Central Latin America and Caribbean Region

HAZ

WAZ

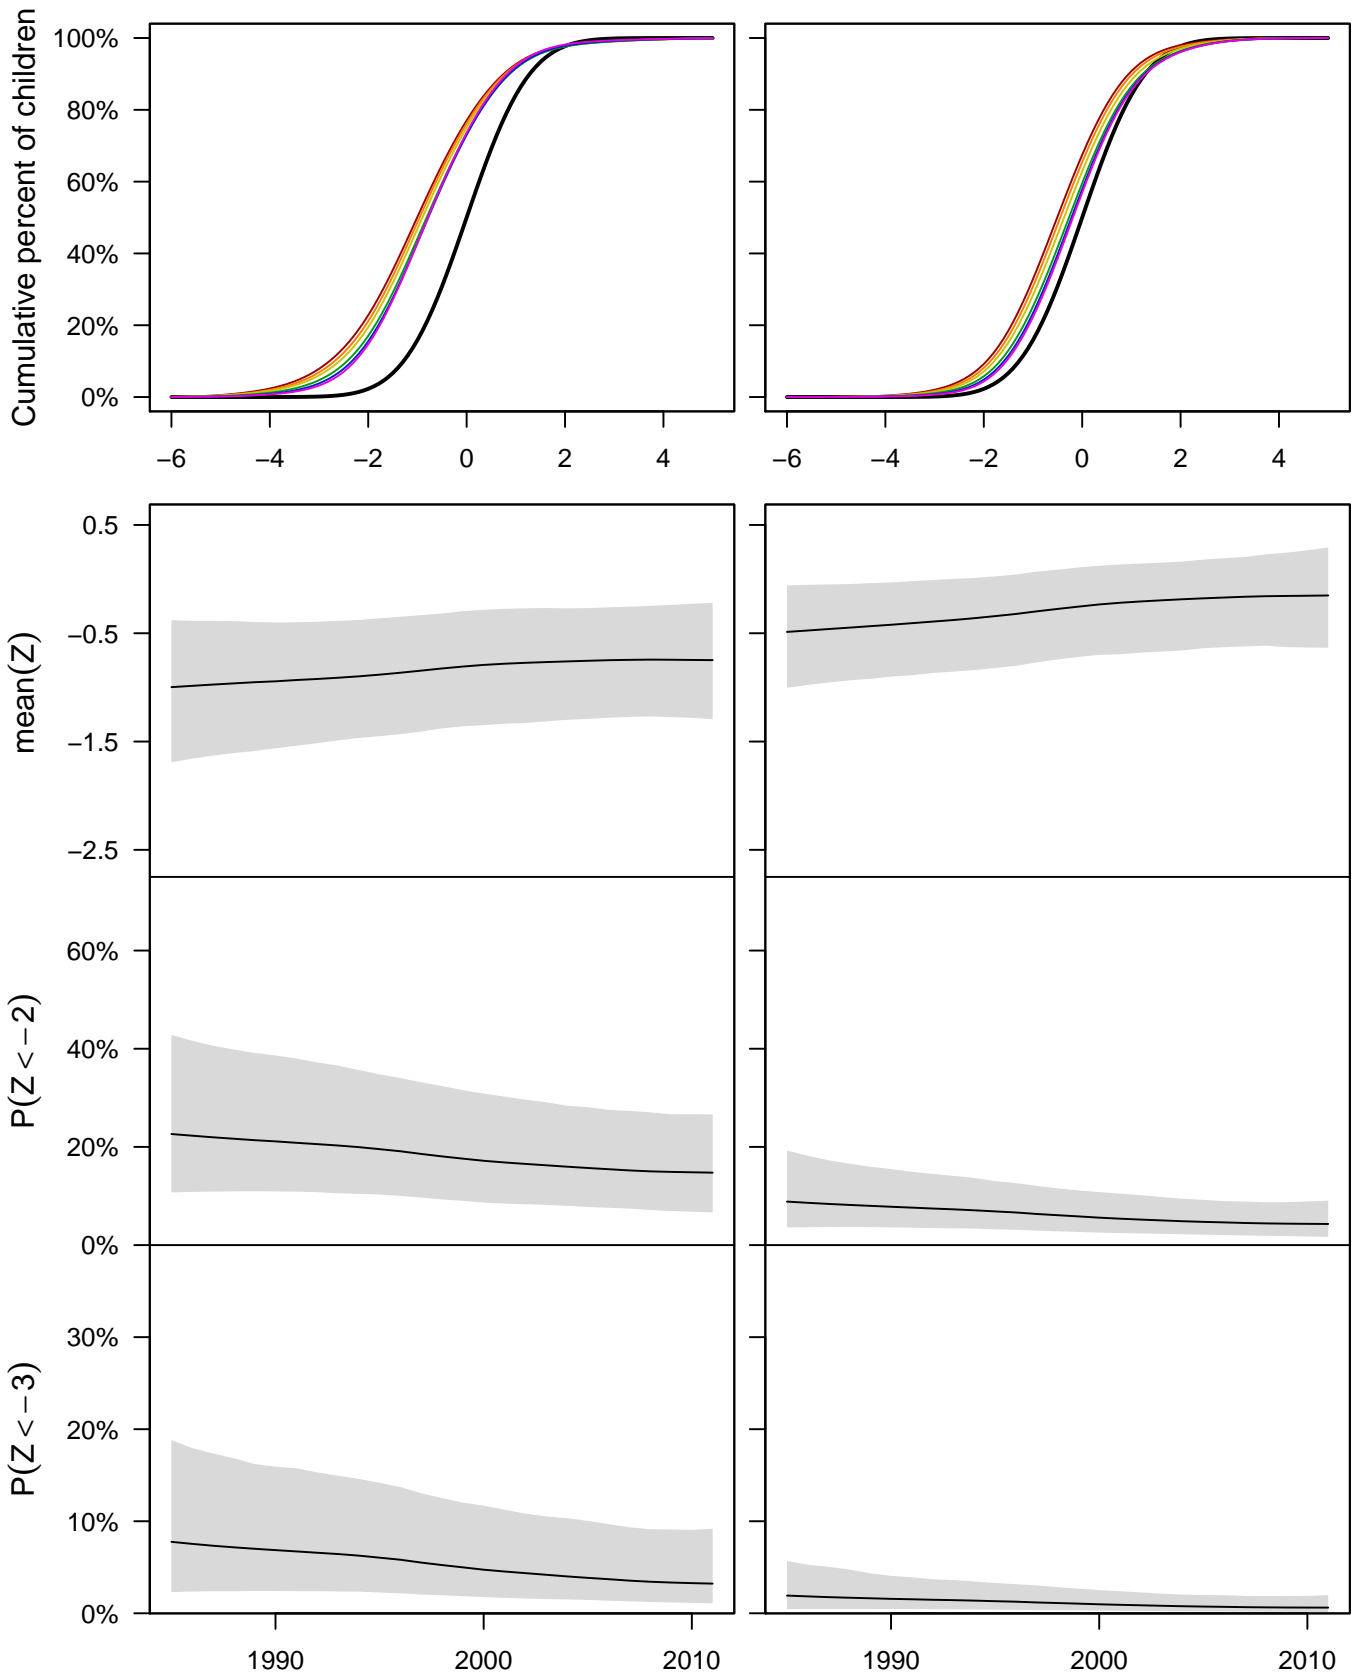

# Belize

Andean and Central Latin America and Caribbean Region

HAZ

WAZ

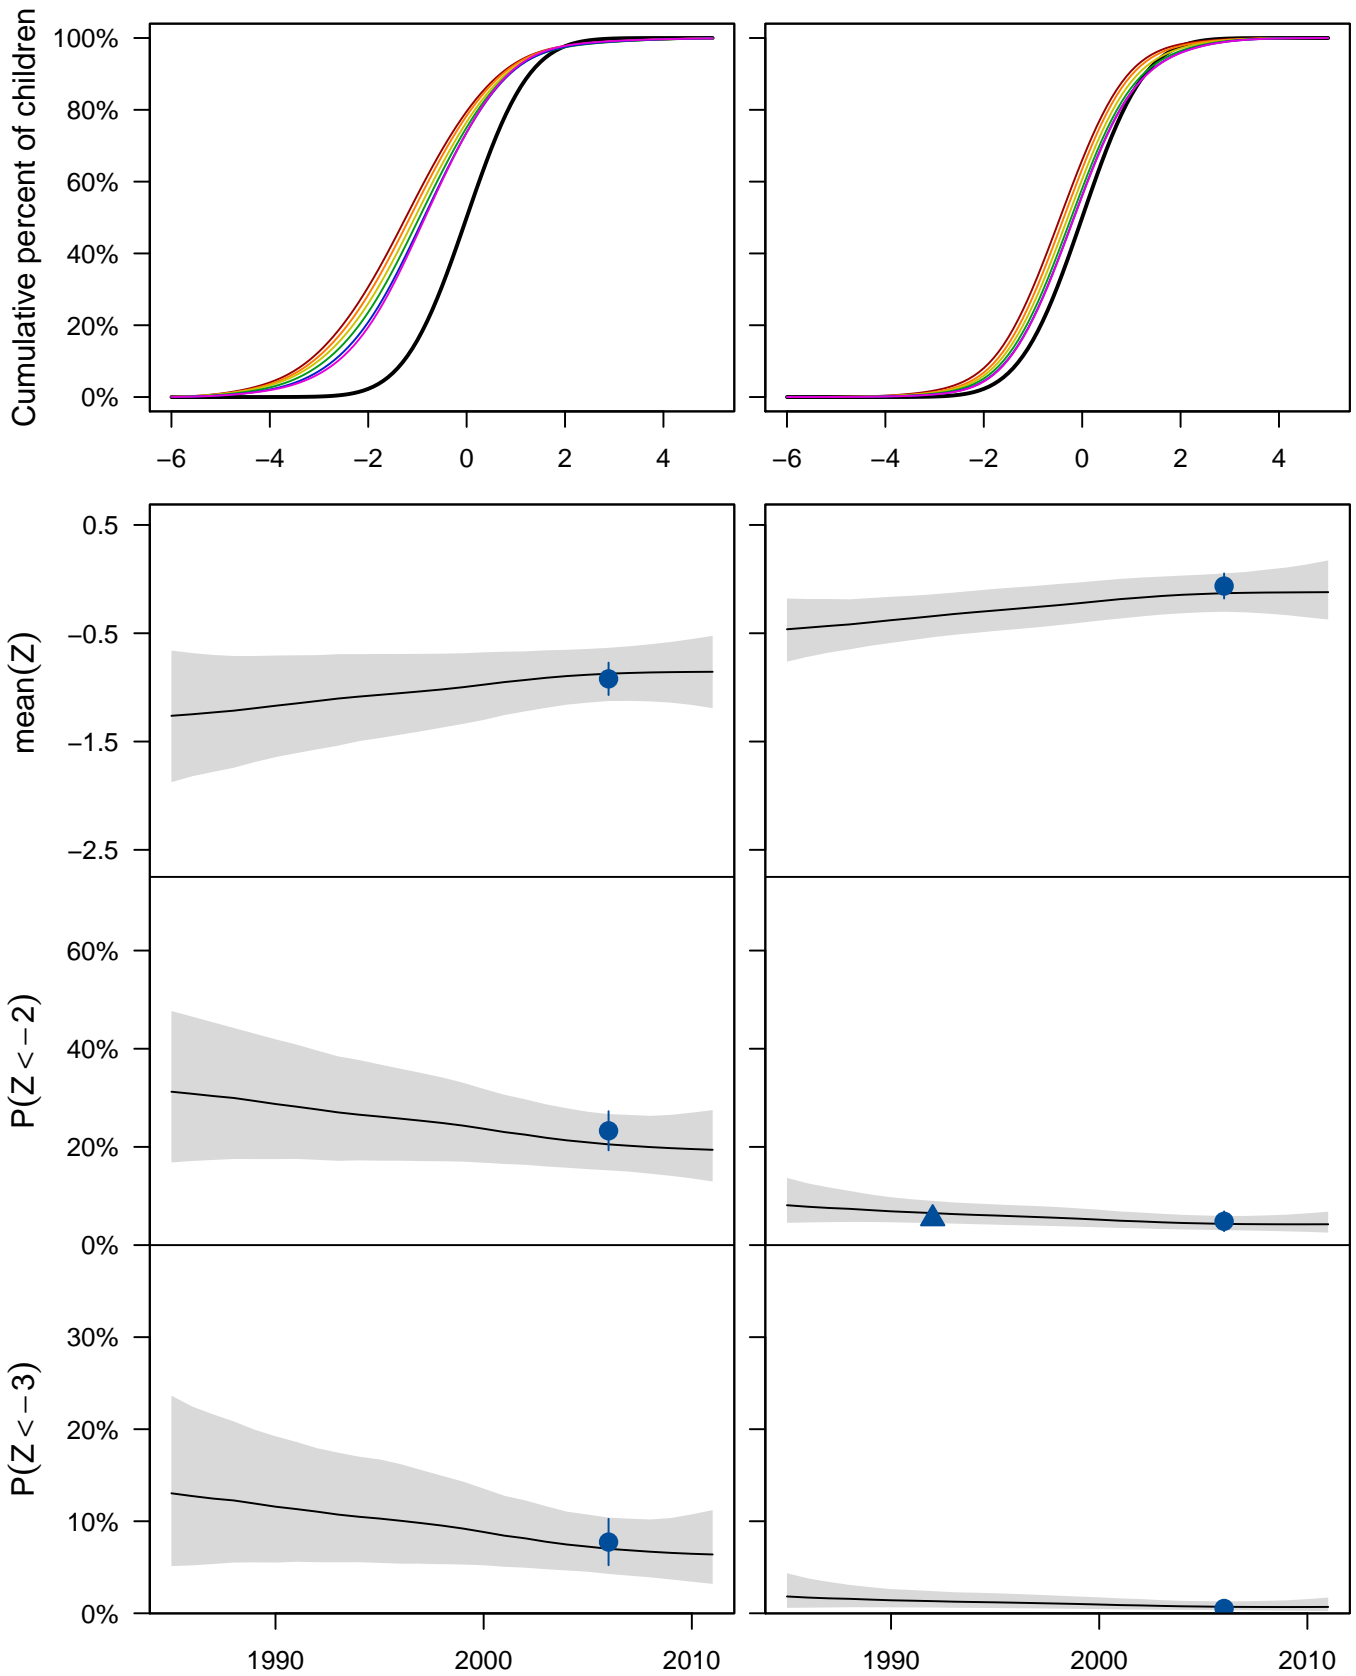

# Benin

Sub-Saharan Africa Region

### HAZ

### WAZ

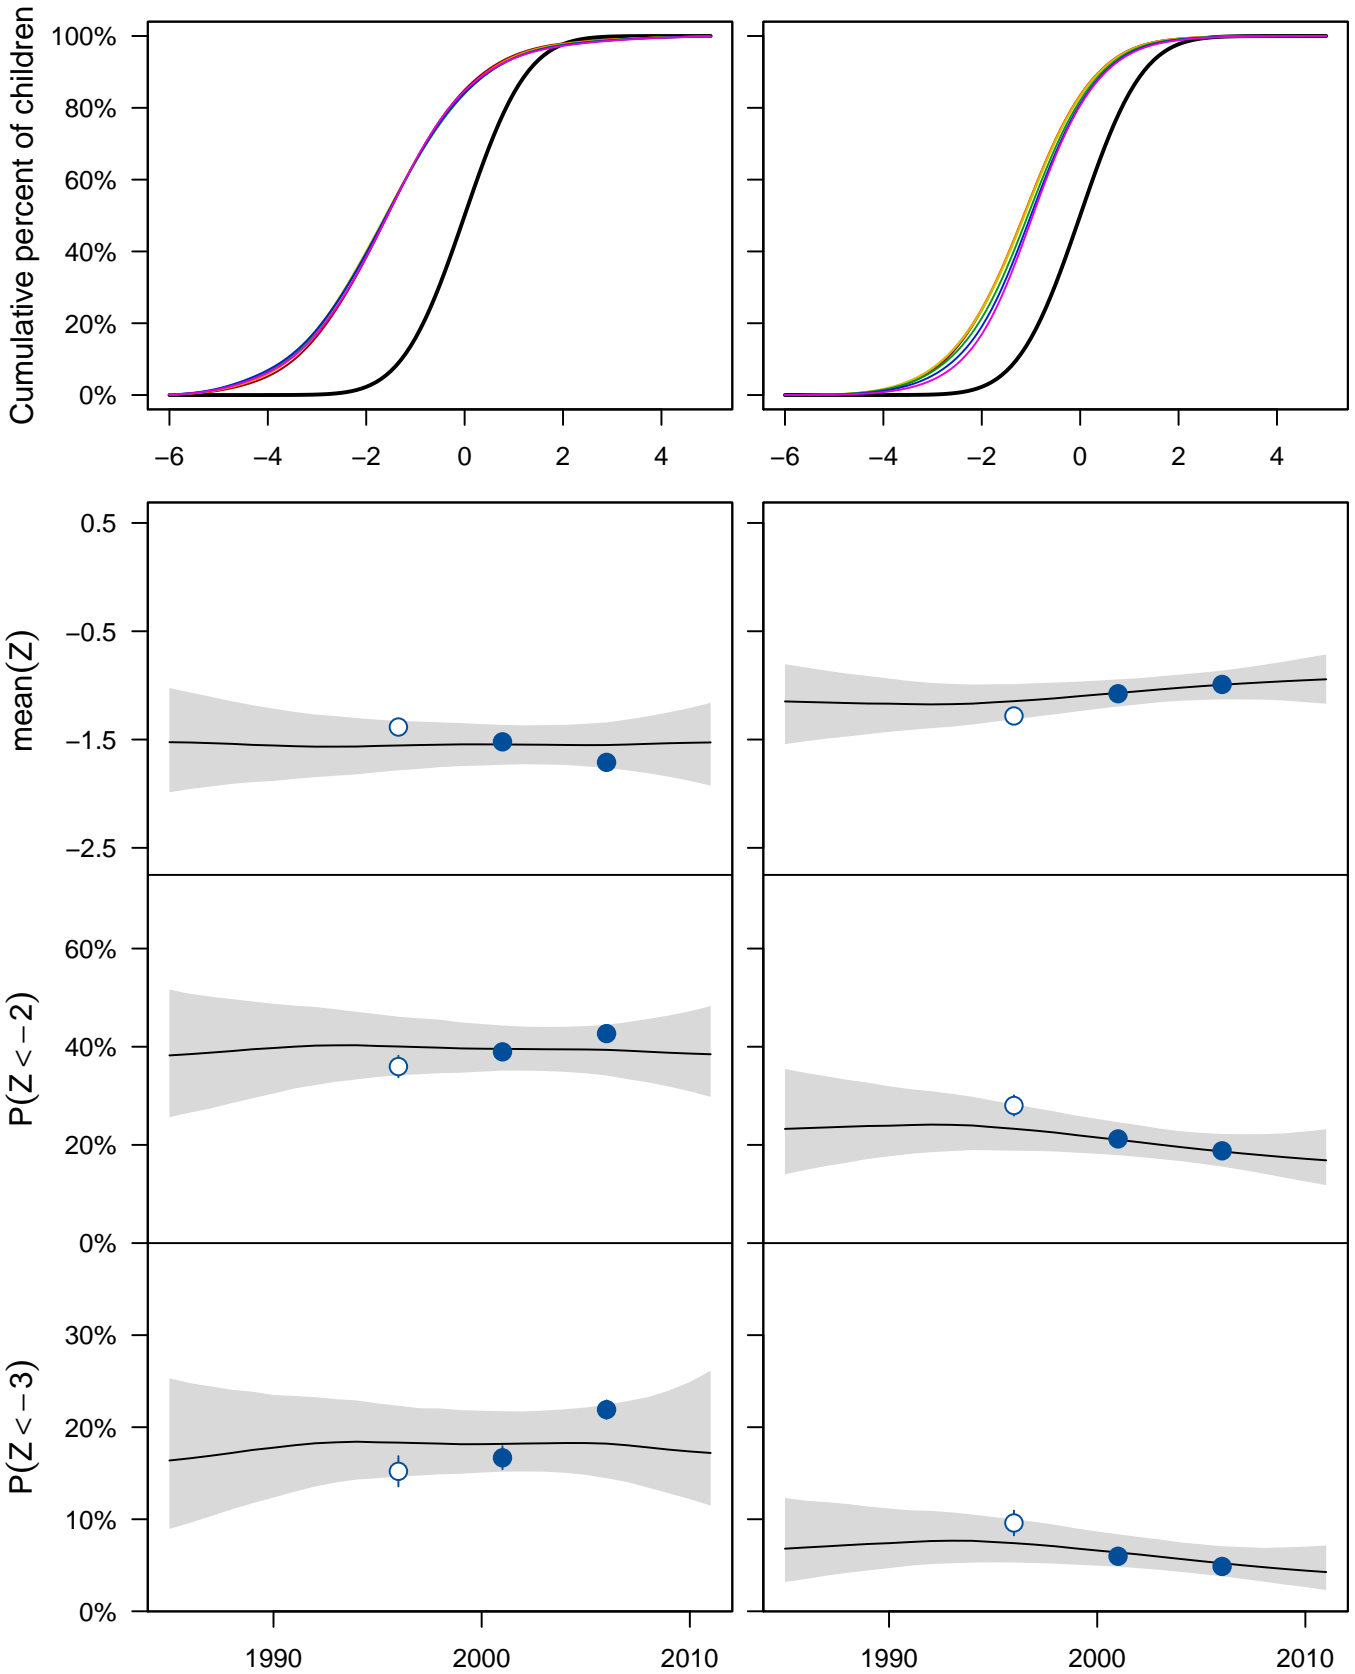



# Bermuda

Andean and Central Latin America and Caribbean Region

HAZ

WAZ

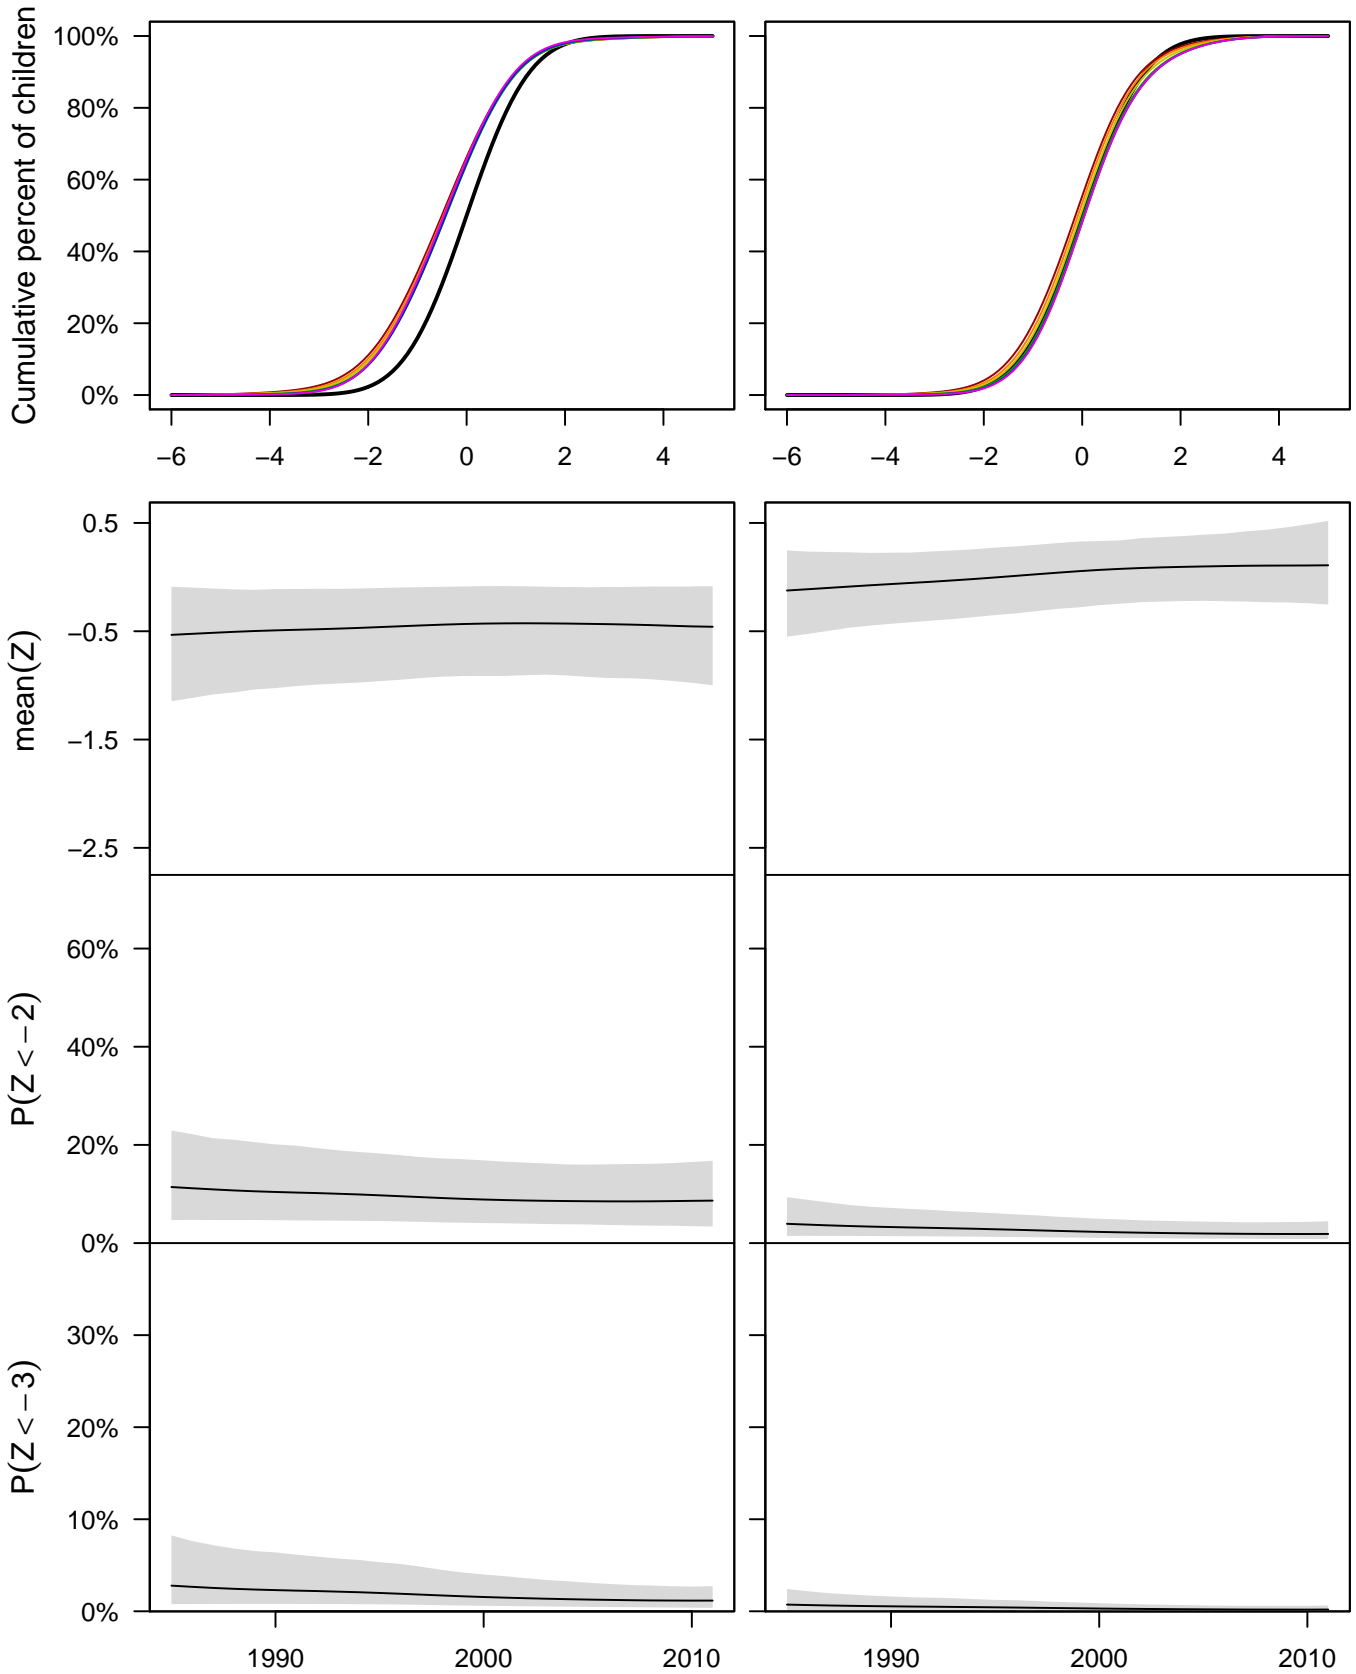

# Bhutan

## South Asia Region

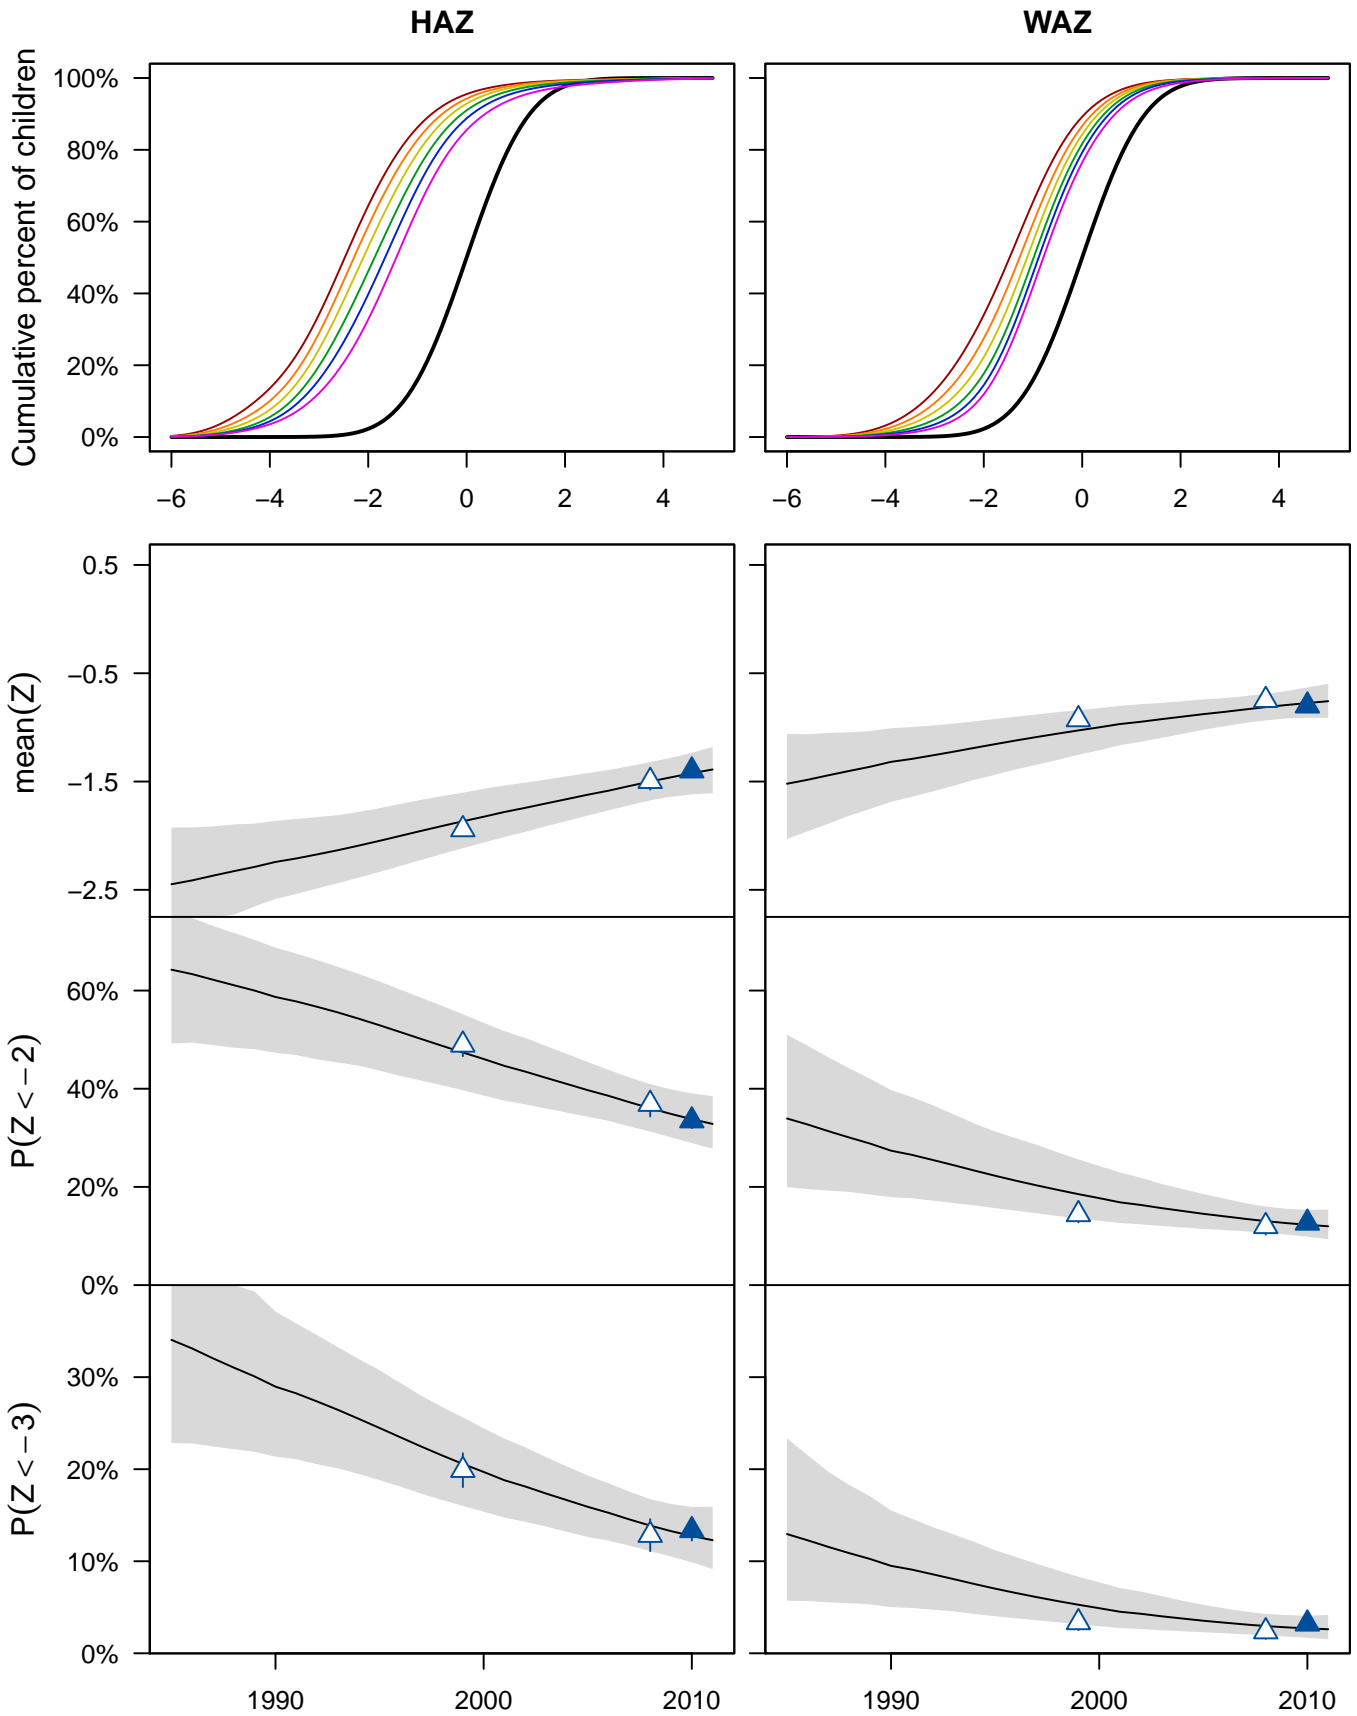

# Bolivia

Andean and Central Latin America and Caribbean Region

HAZ

WAZ

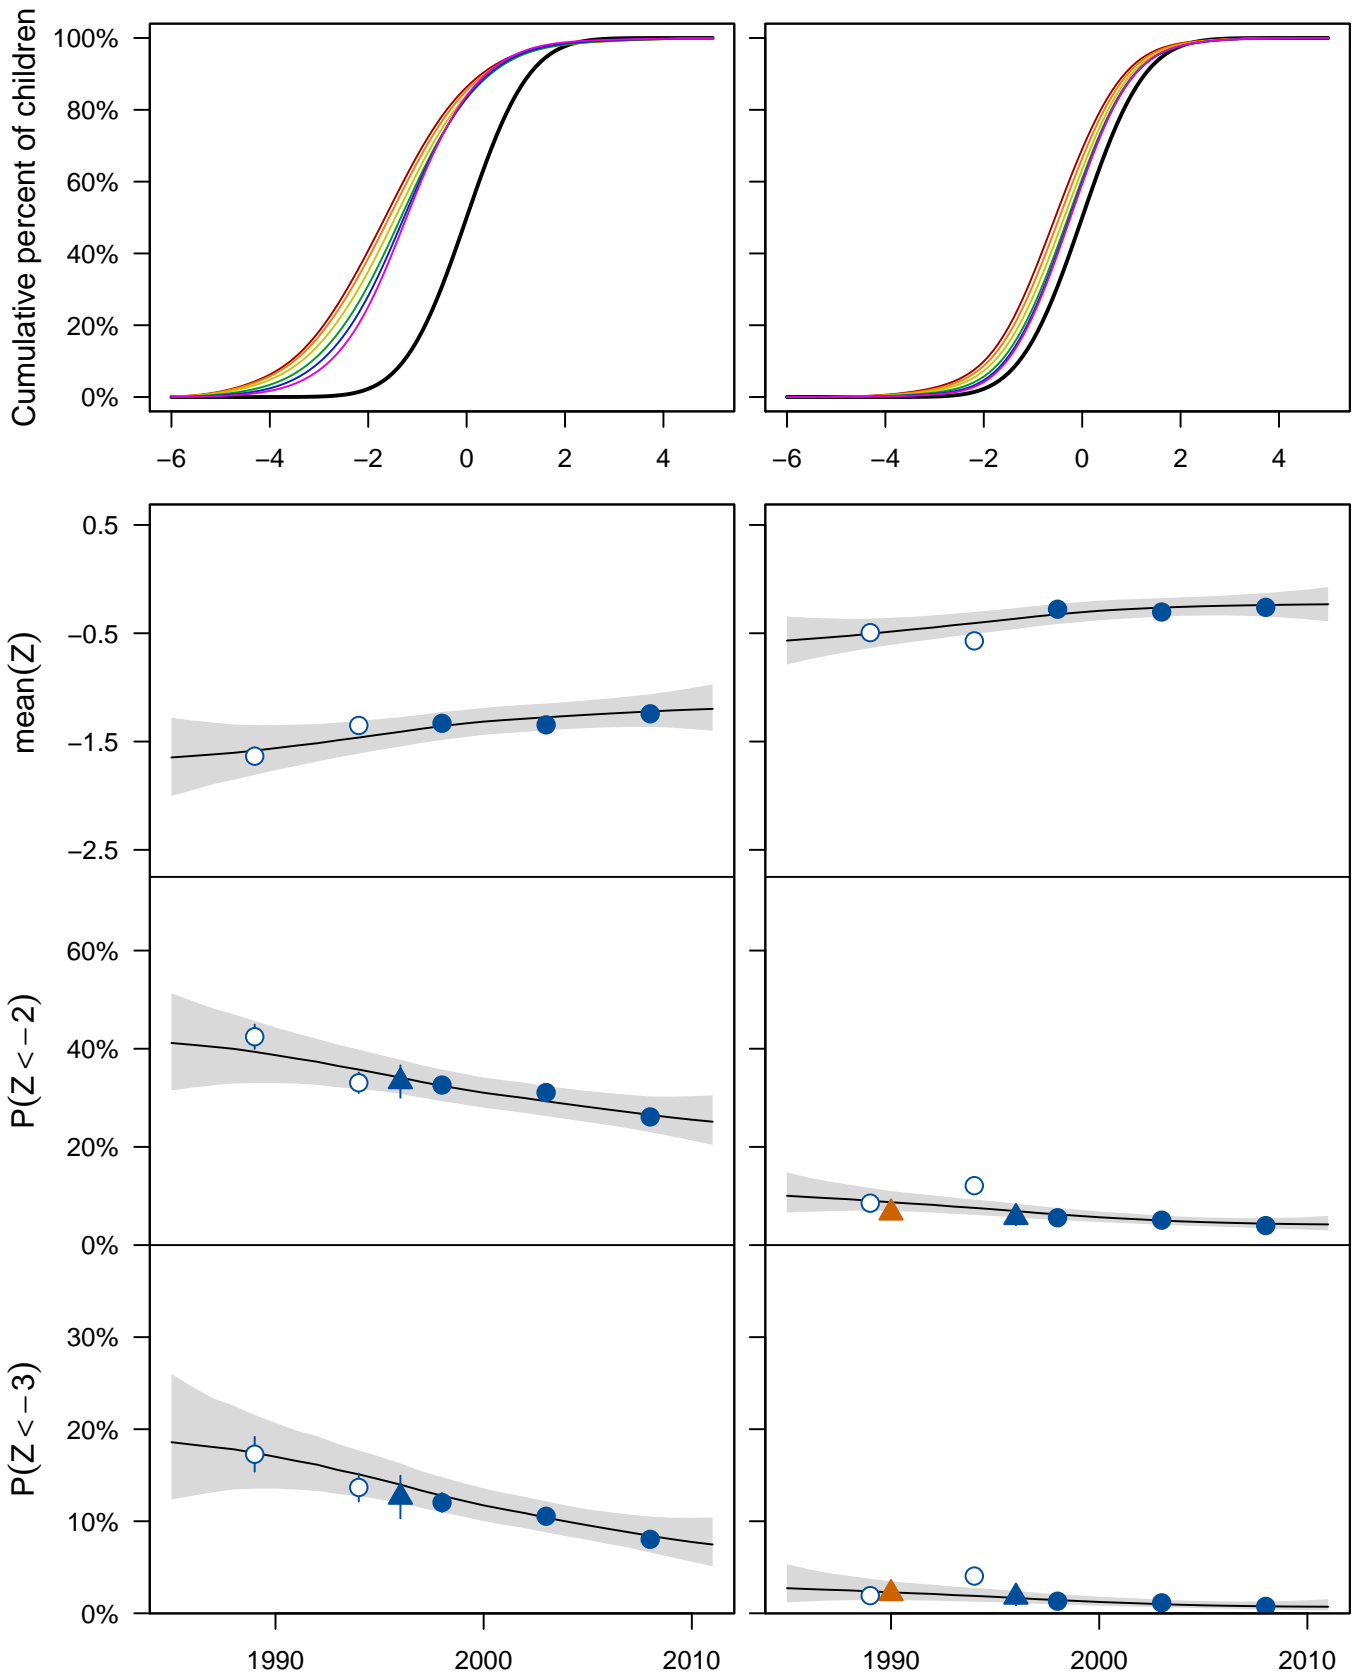

# Botswana

Sub-Saharan Africa Region

HAZ

WAZ

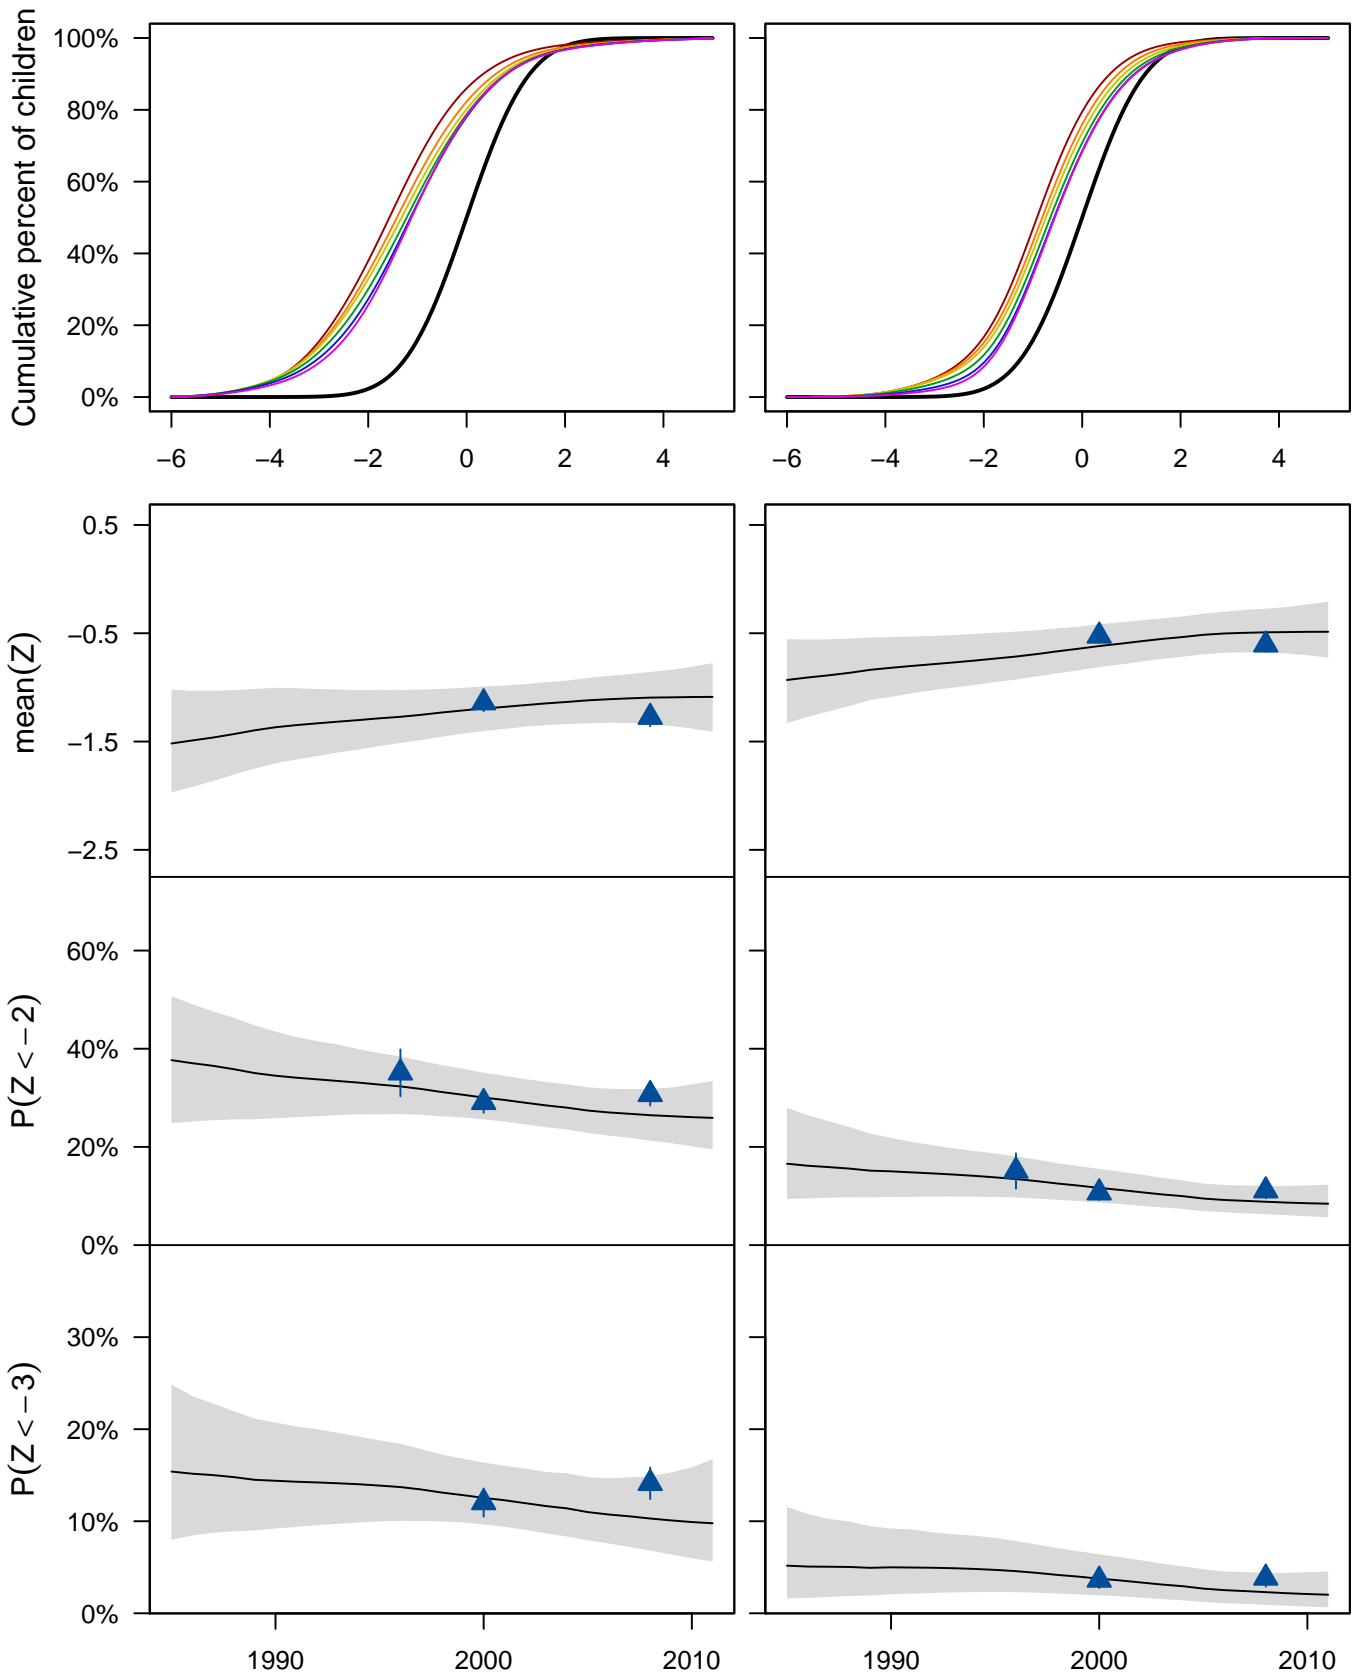

# Brazil

## Southern and Tropical Latin America Region

### HAZ

### WAZ

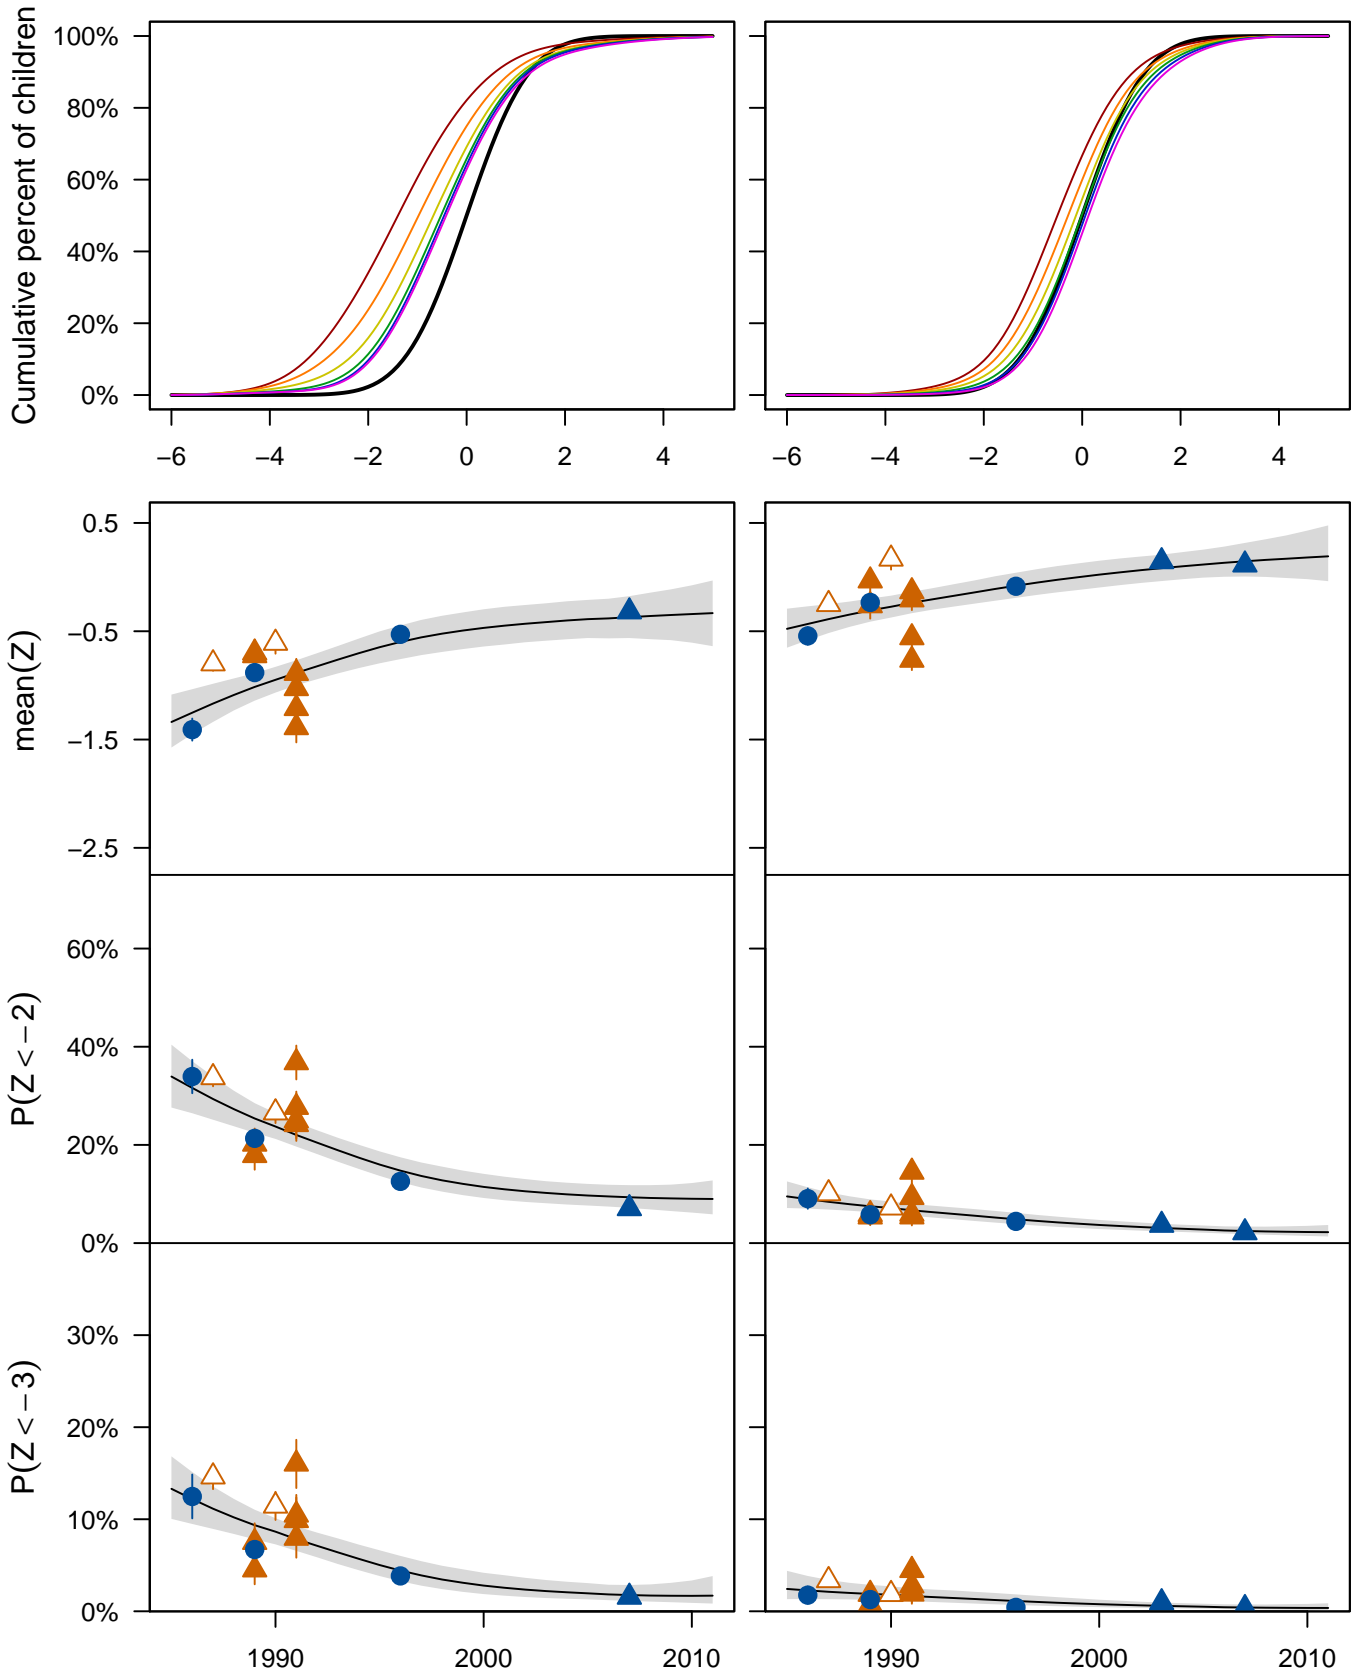

# Burkina Faso

## Sub-Saharan Africa Region

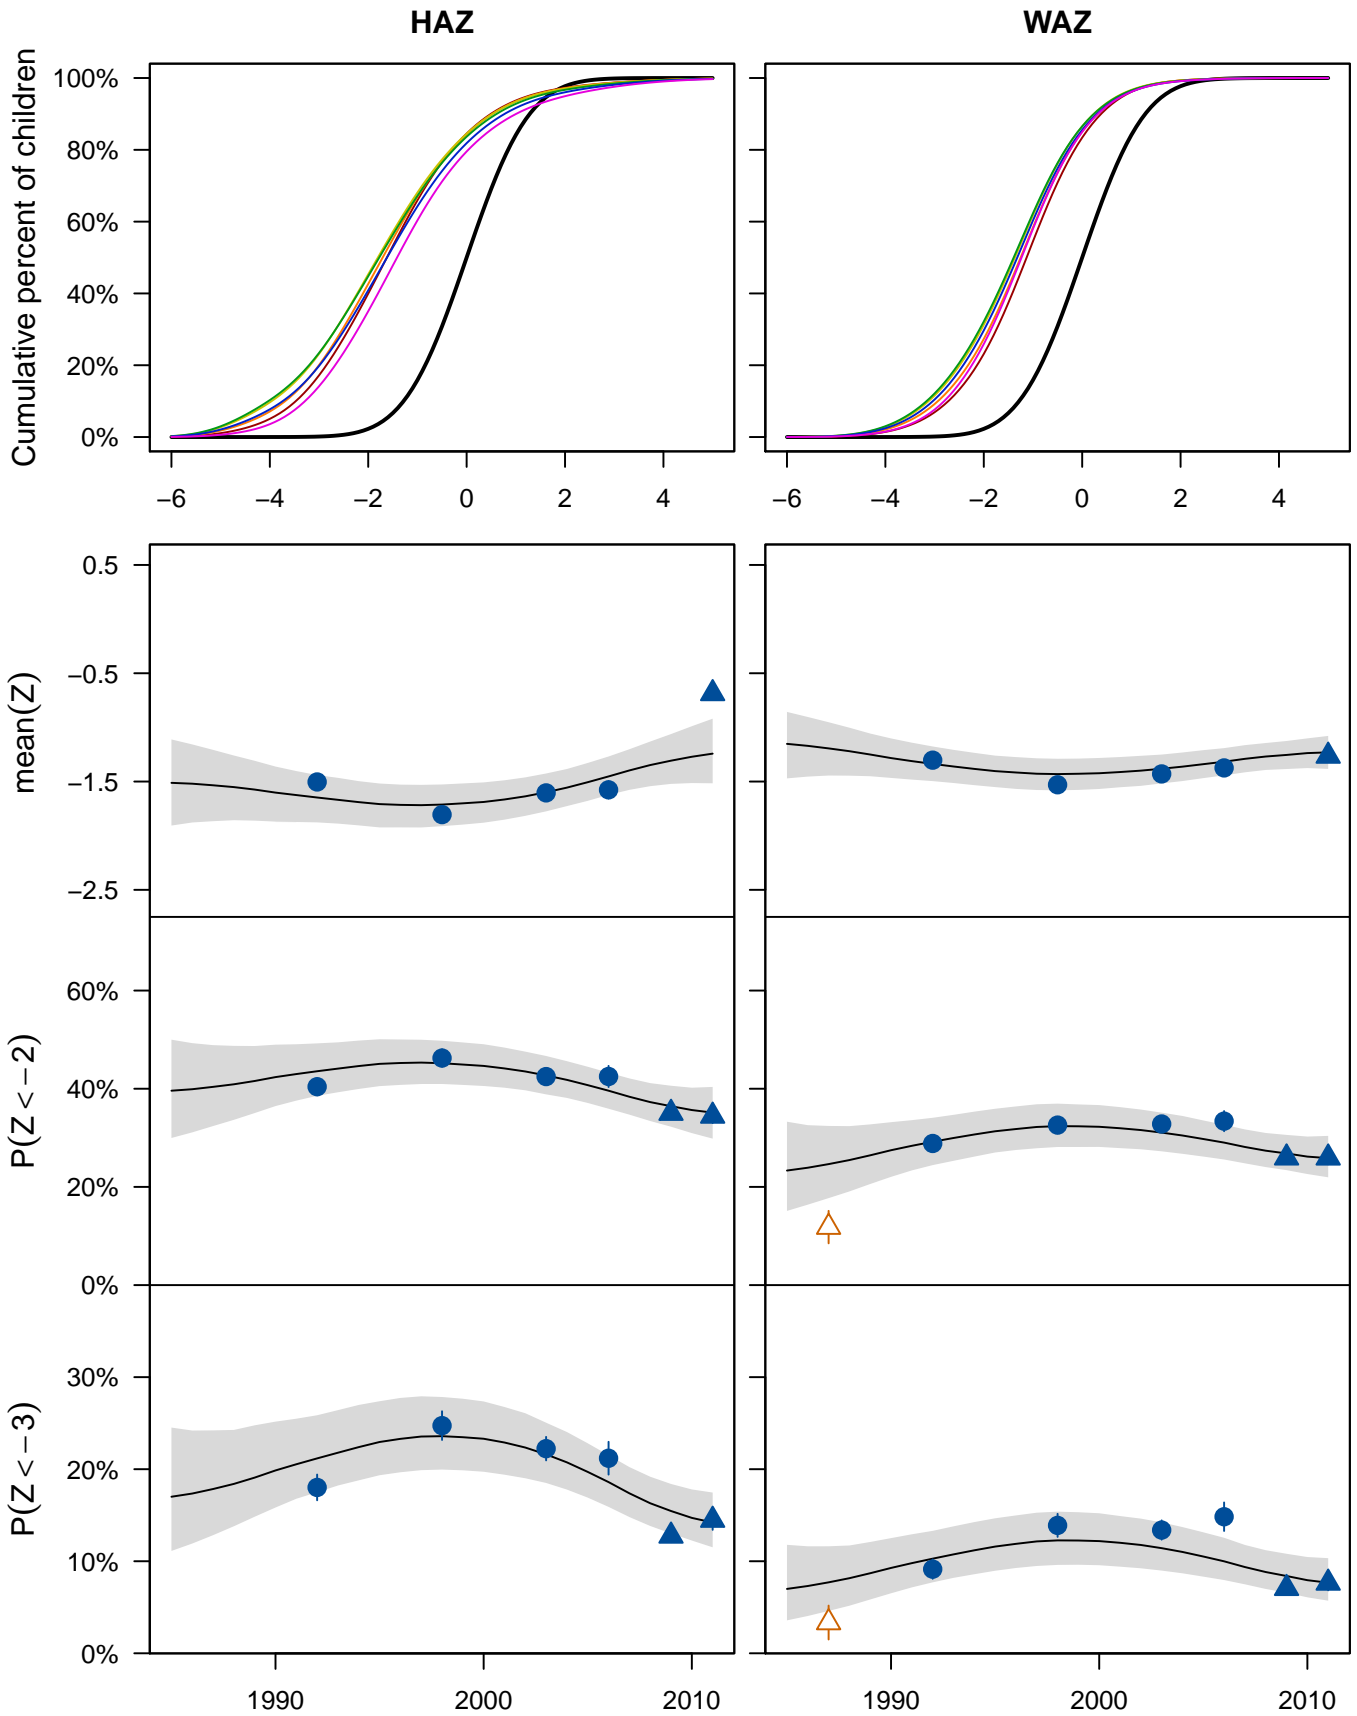

# Burundi

Sub-Saharan Africa Region

HAZ

WAZ

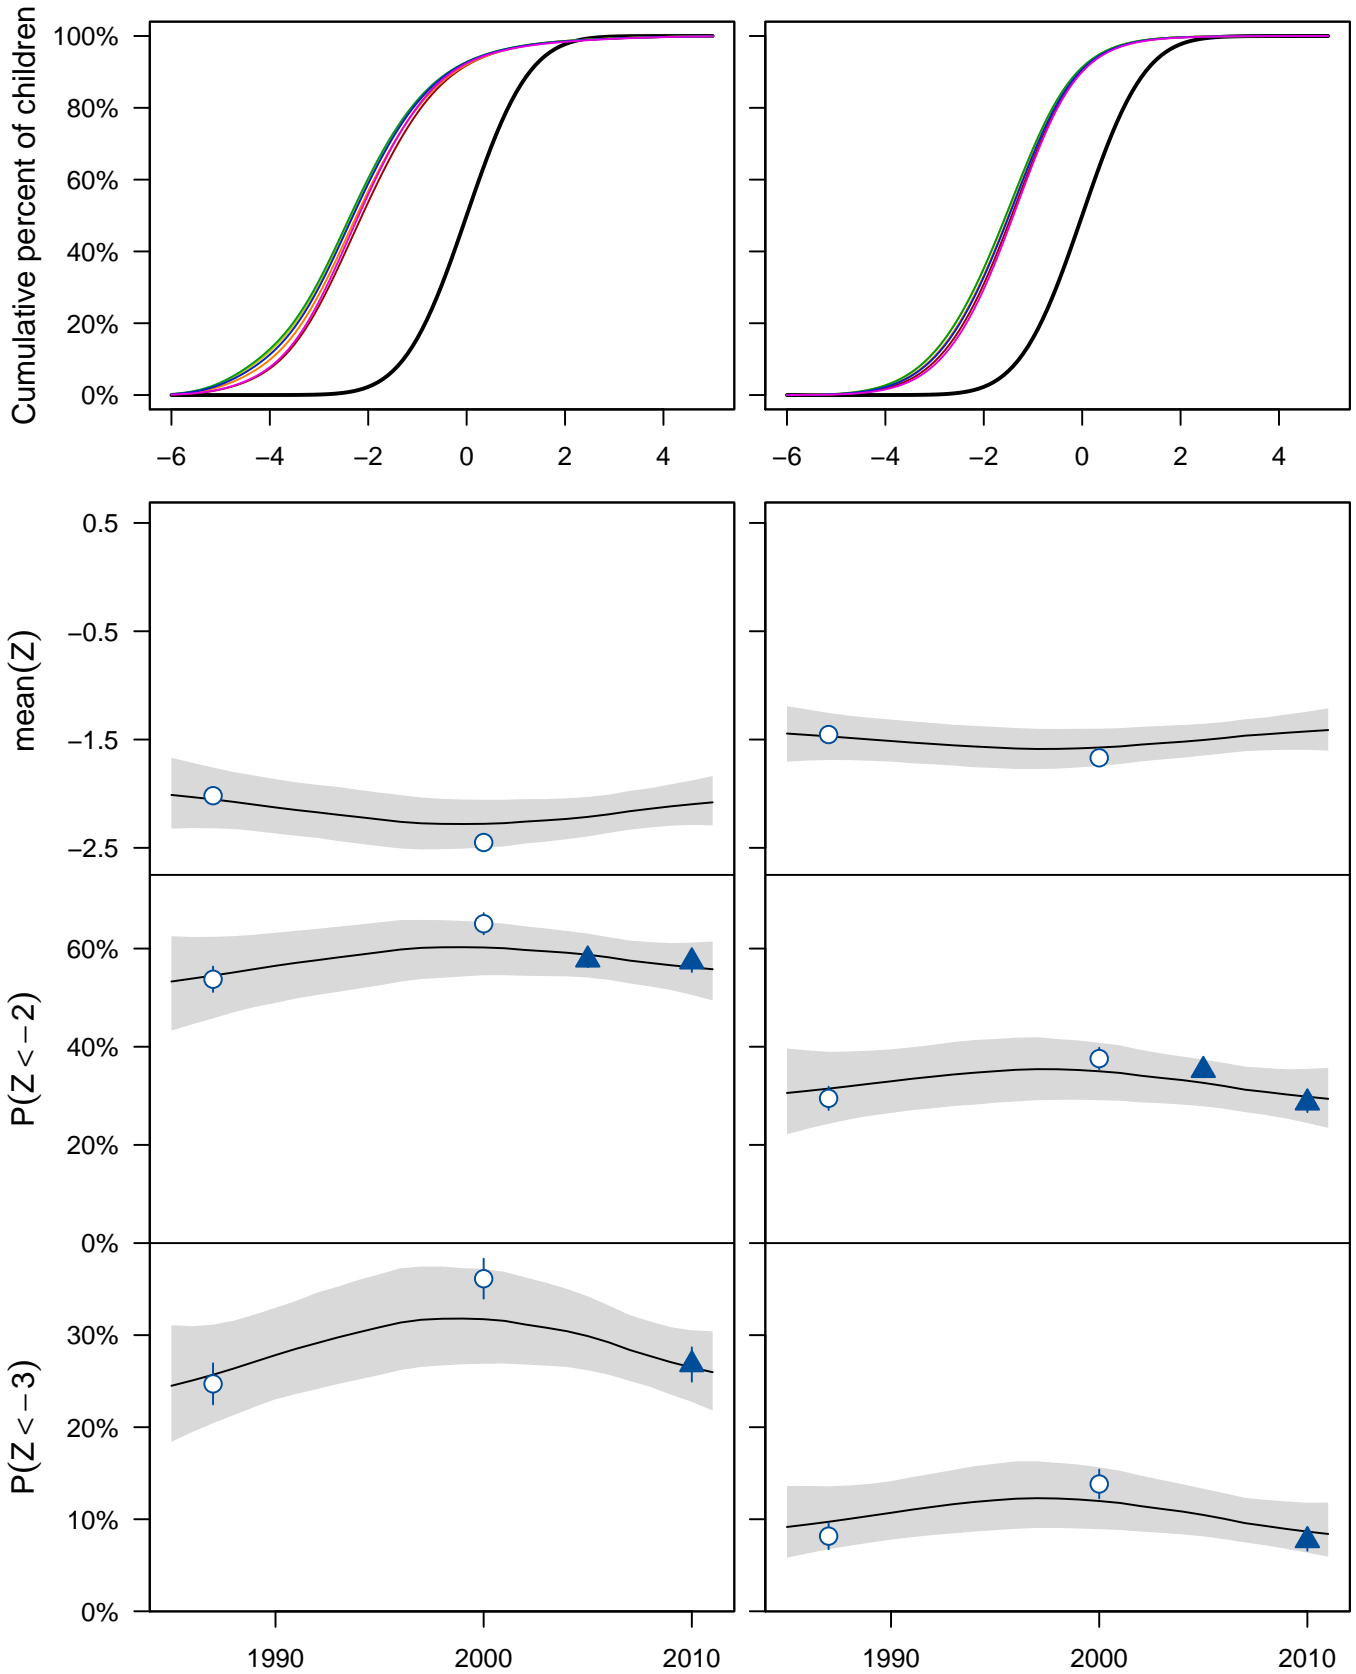

# Cambodia

East and Southeast Asia Region

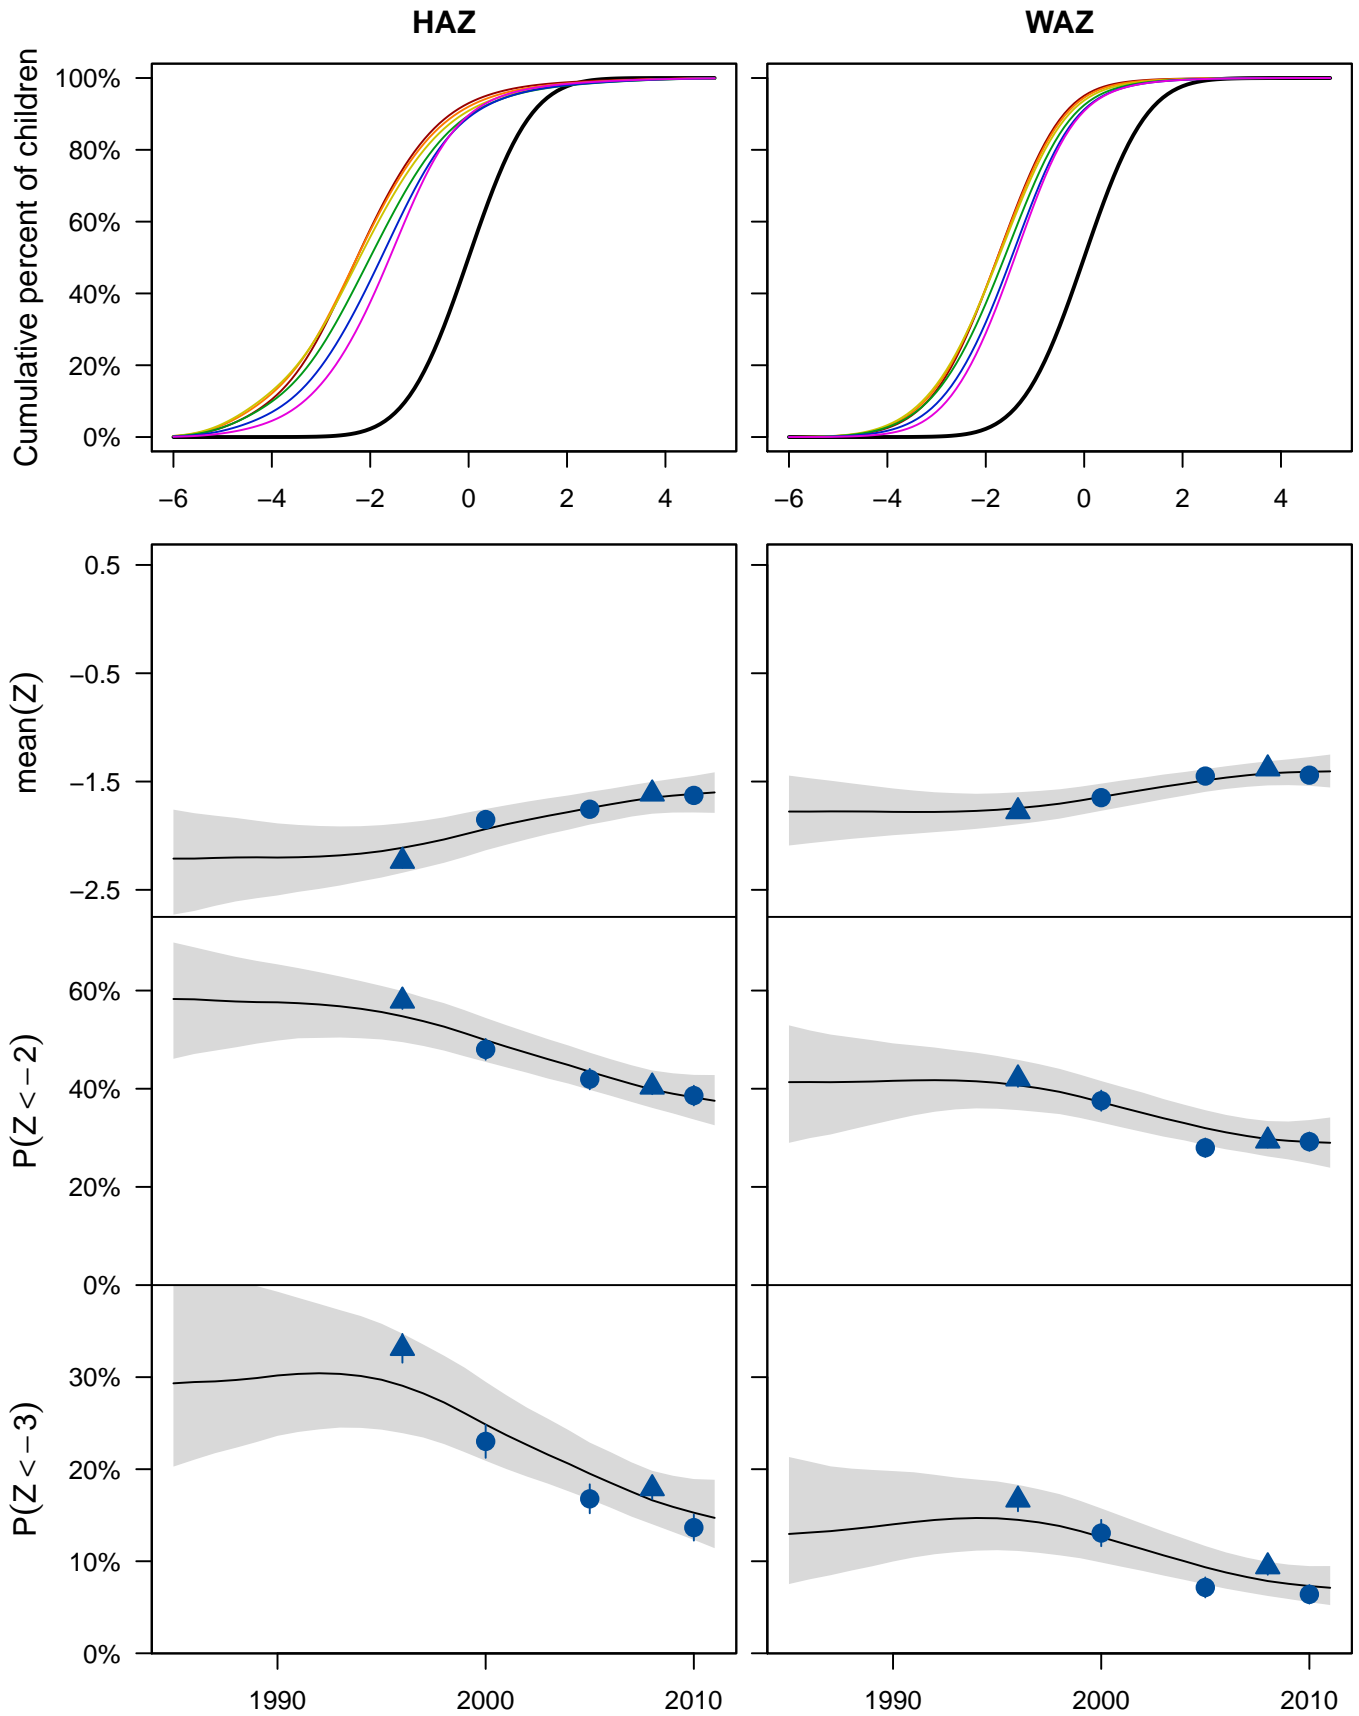



# Cameroon

Sub-Saharan Africa Region

HAZ

WAZ

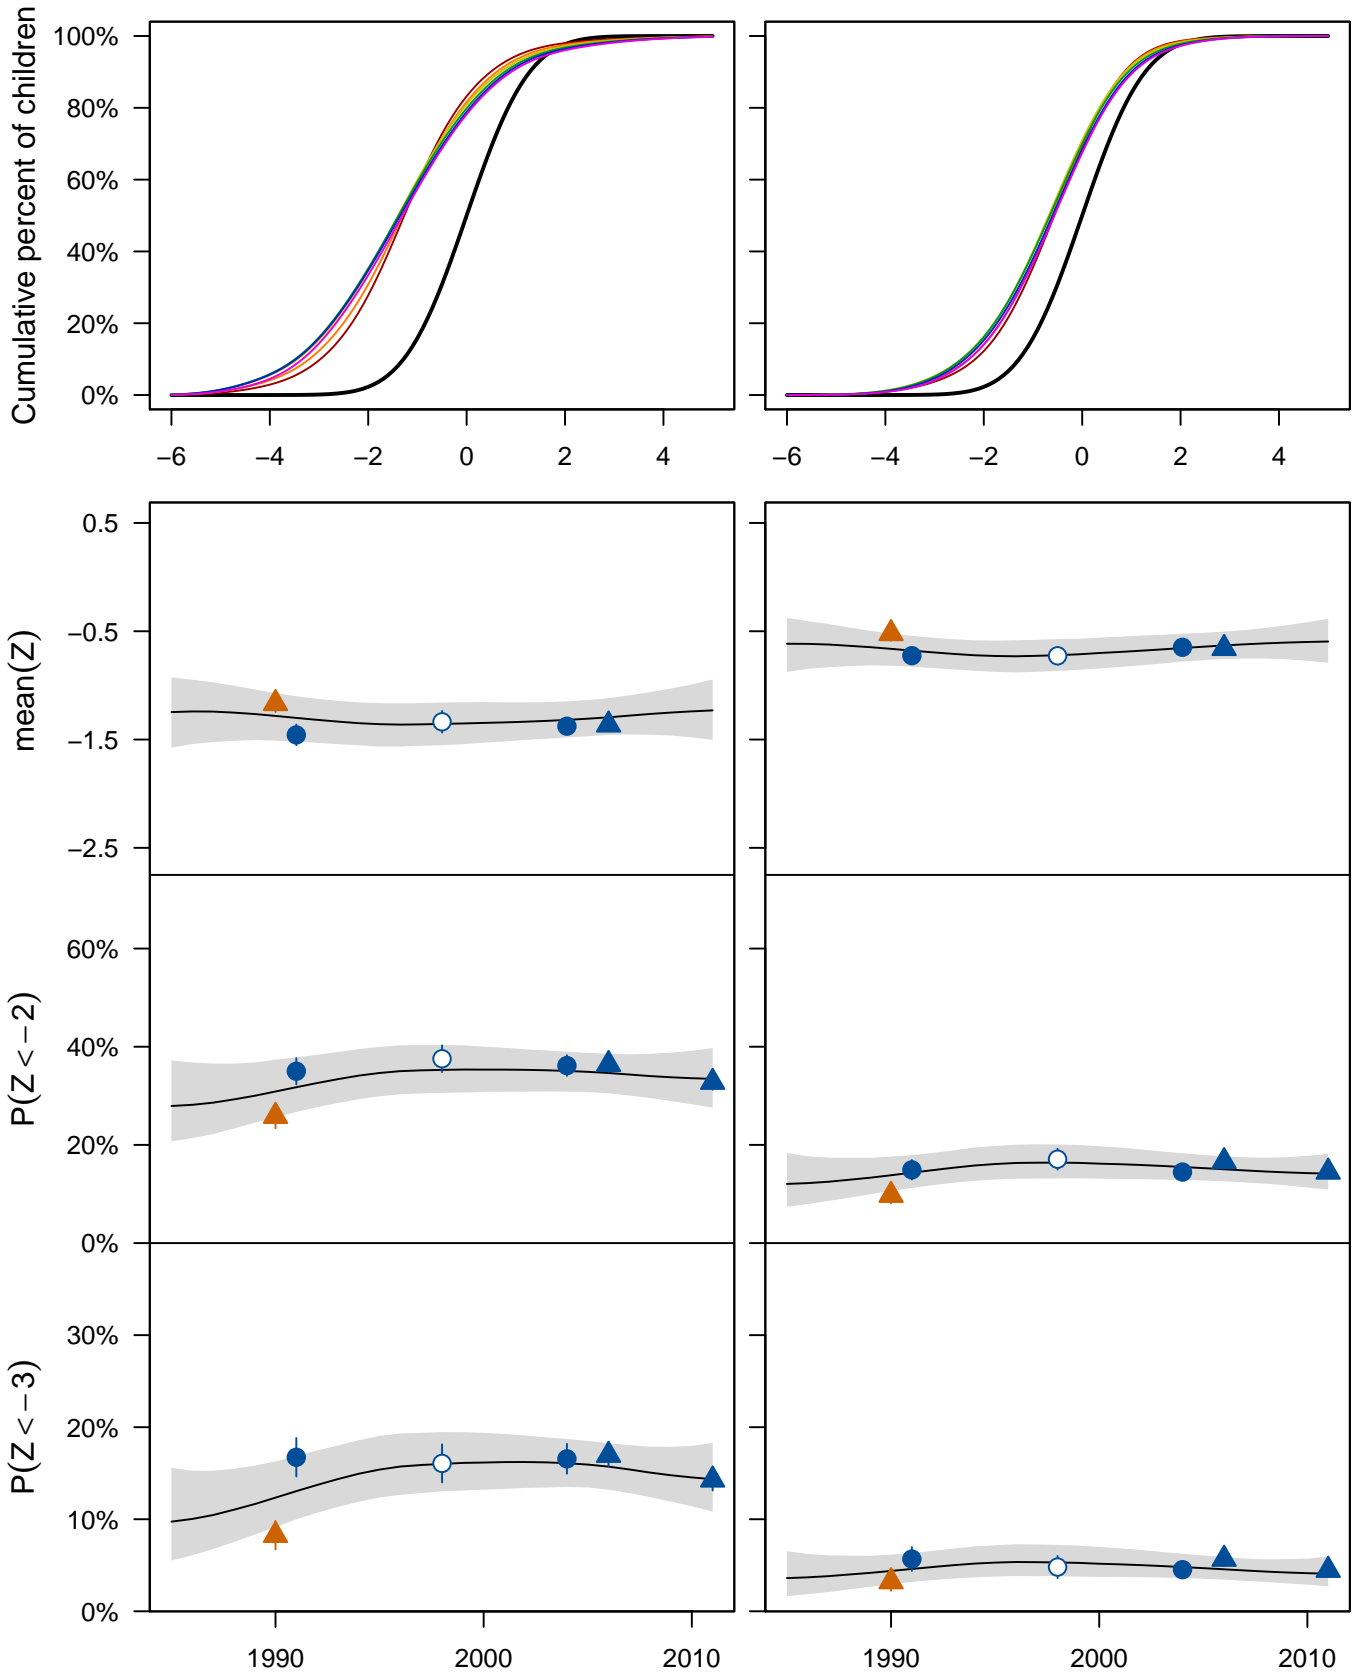

# Cape Verde

Sub-Saharan Africa Region

## HAZ

## WAZ

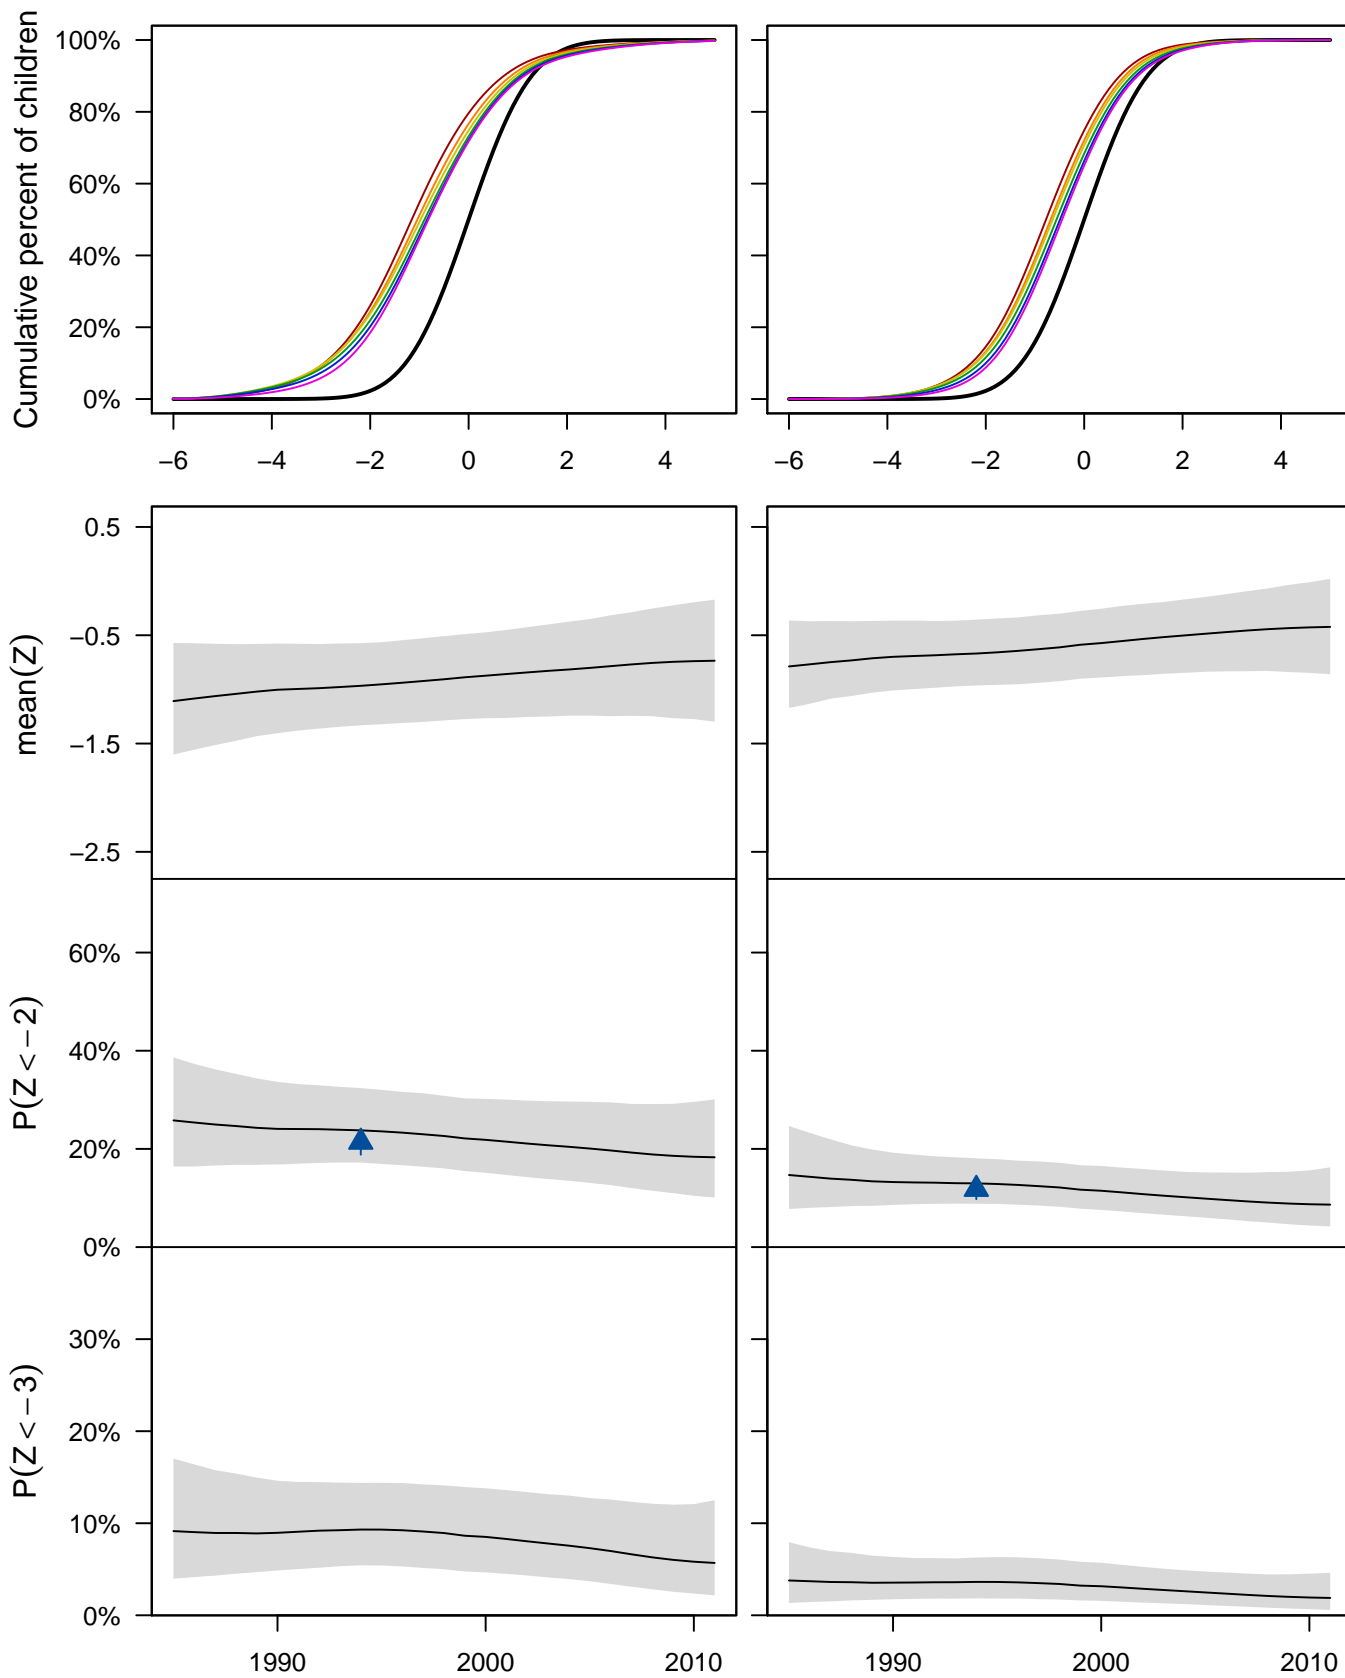

# Central African Republic

Sub-Saharan Africa Region

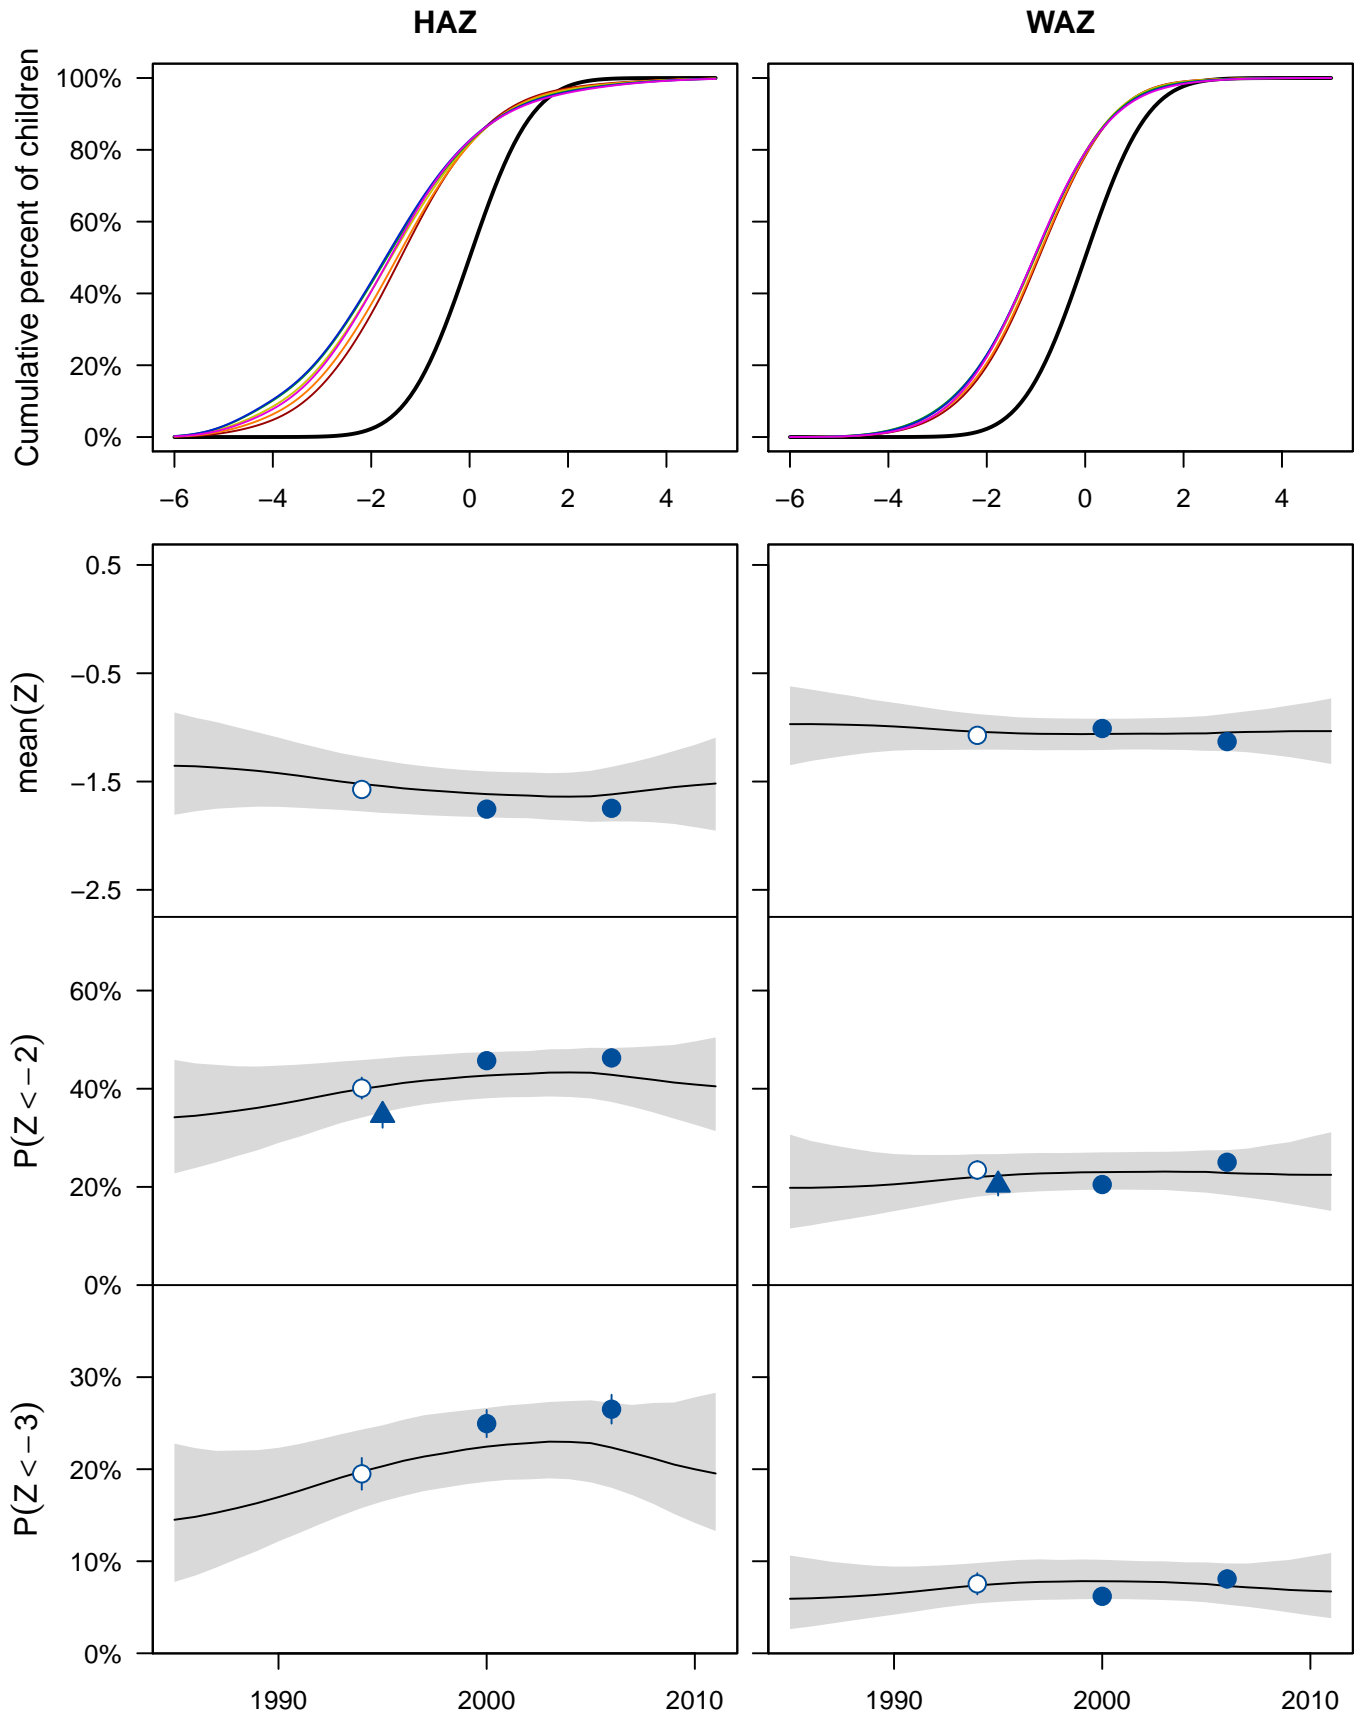

# Chad

## Sub-Saharan Africa Region

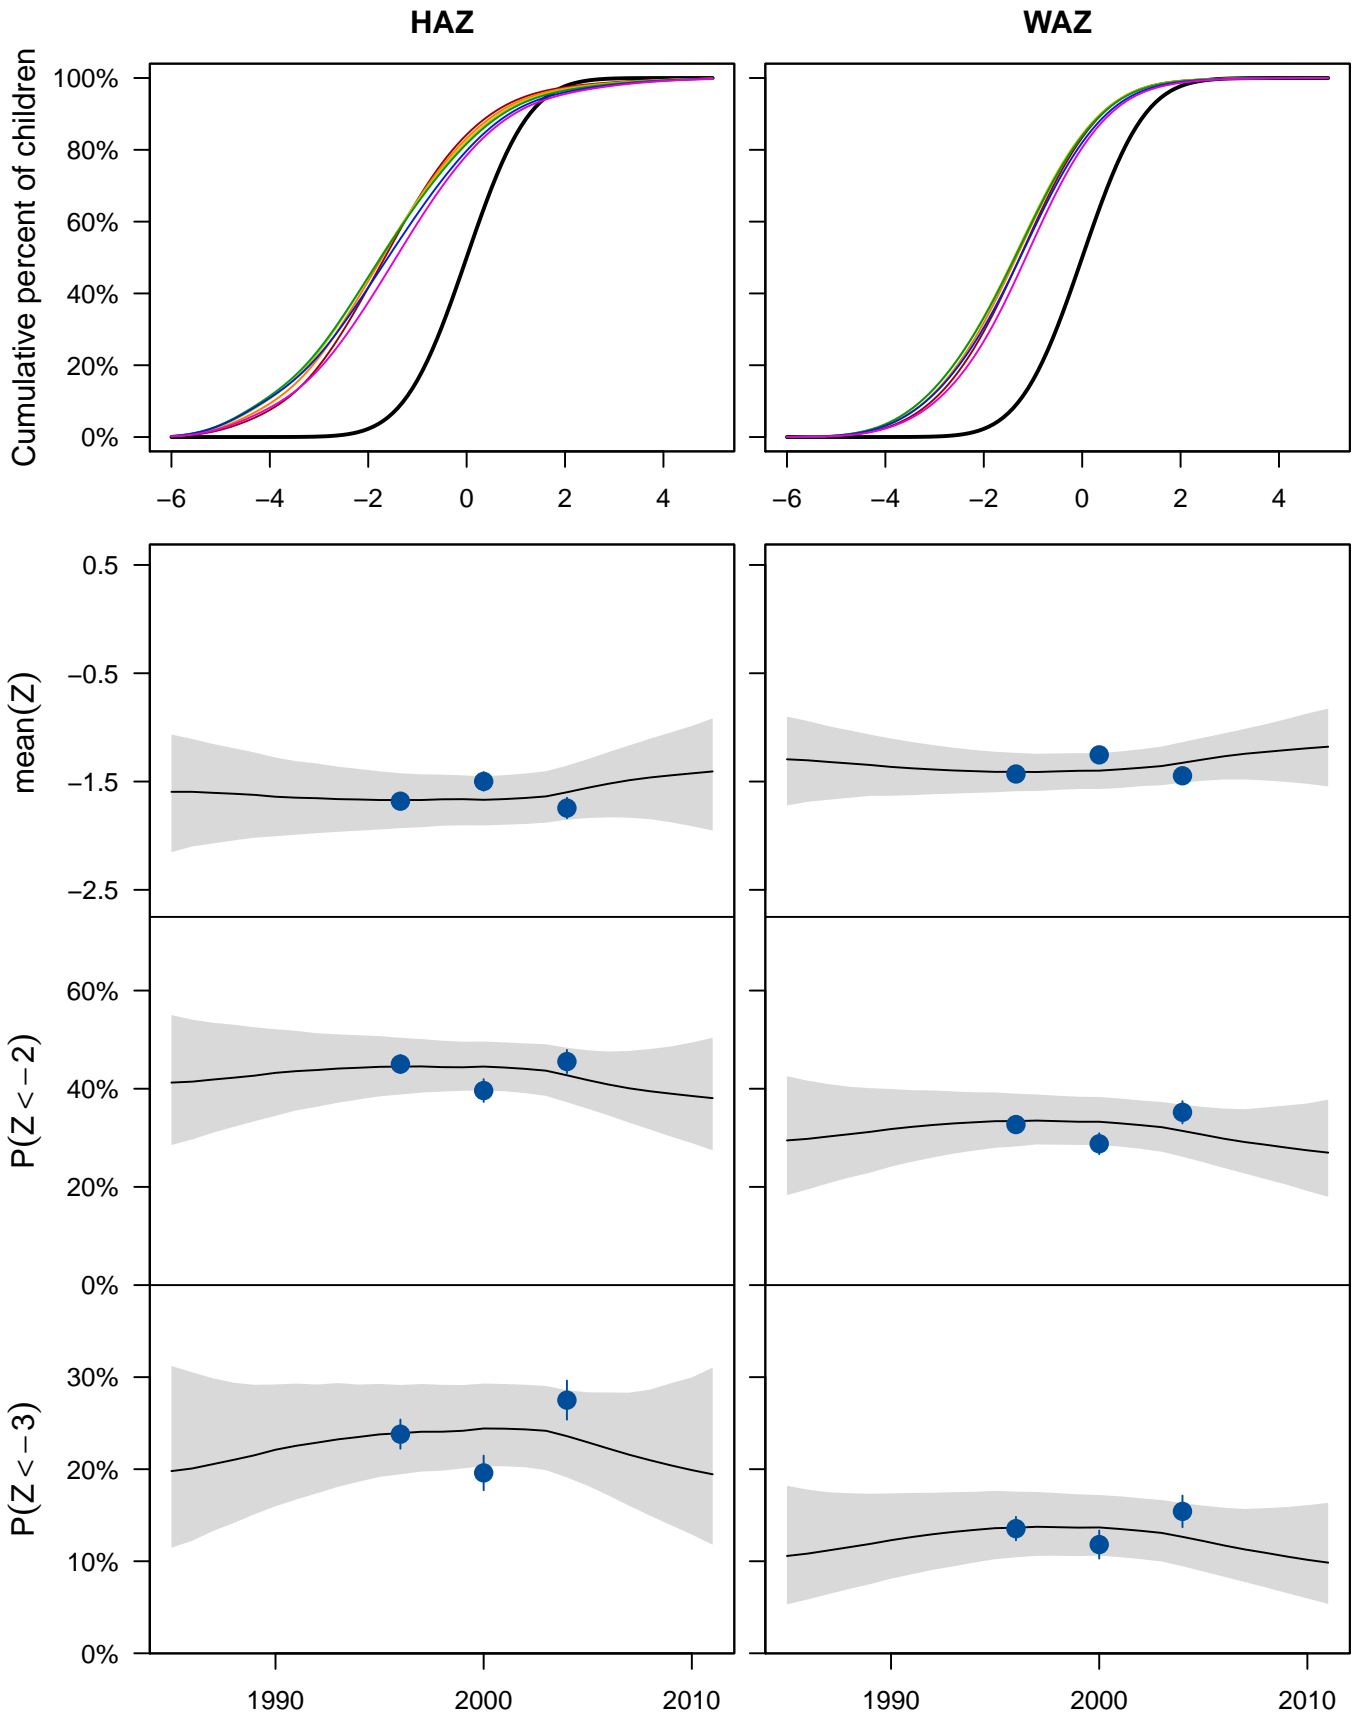

# Chile

Southern and Tropical Latin America Region

HAZ

WAZ

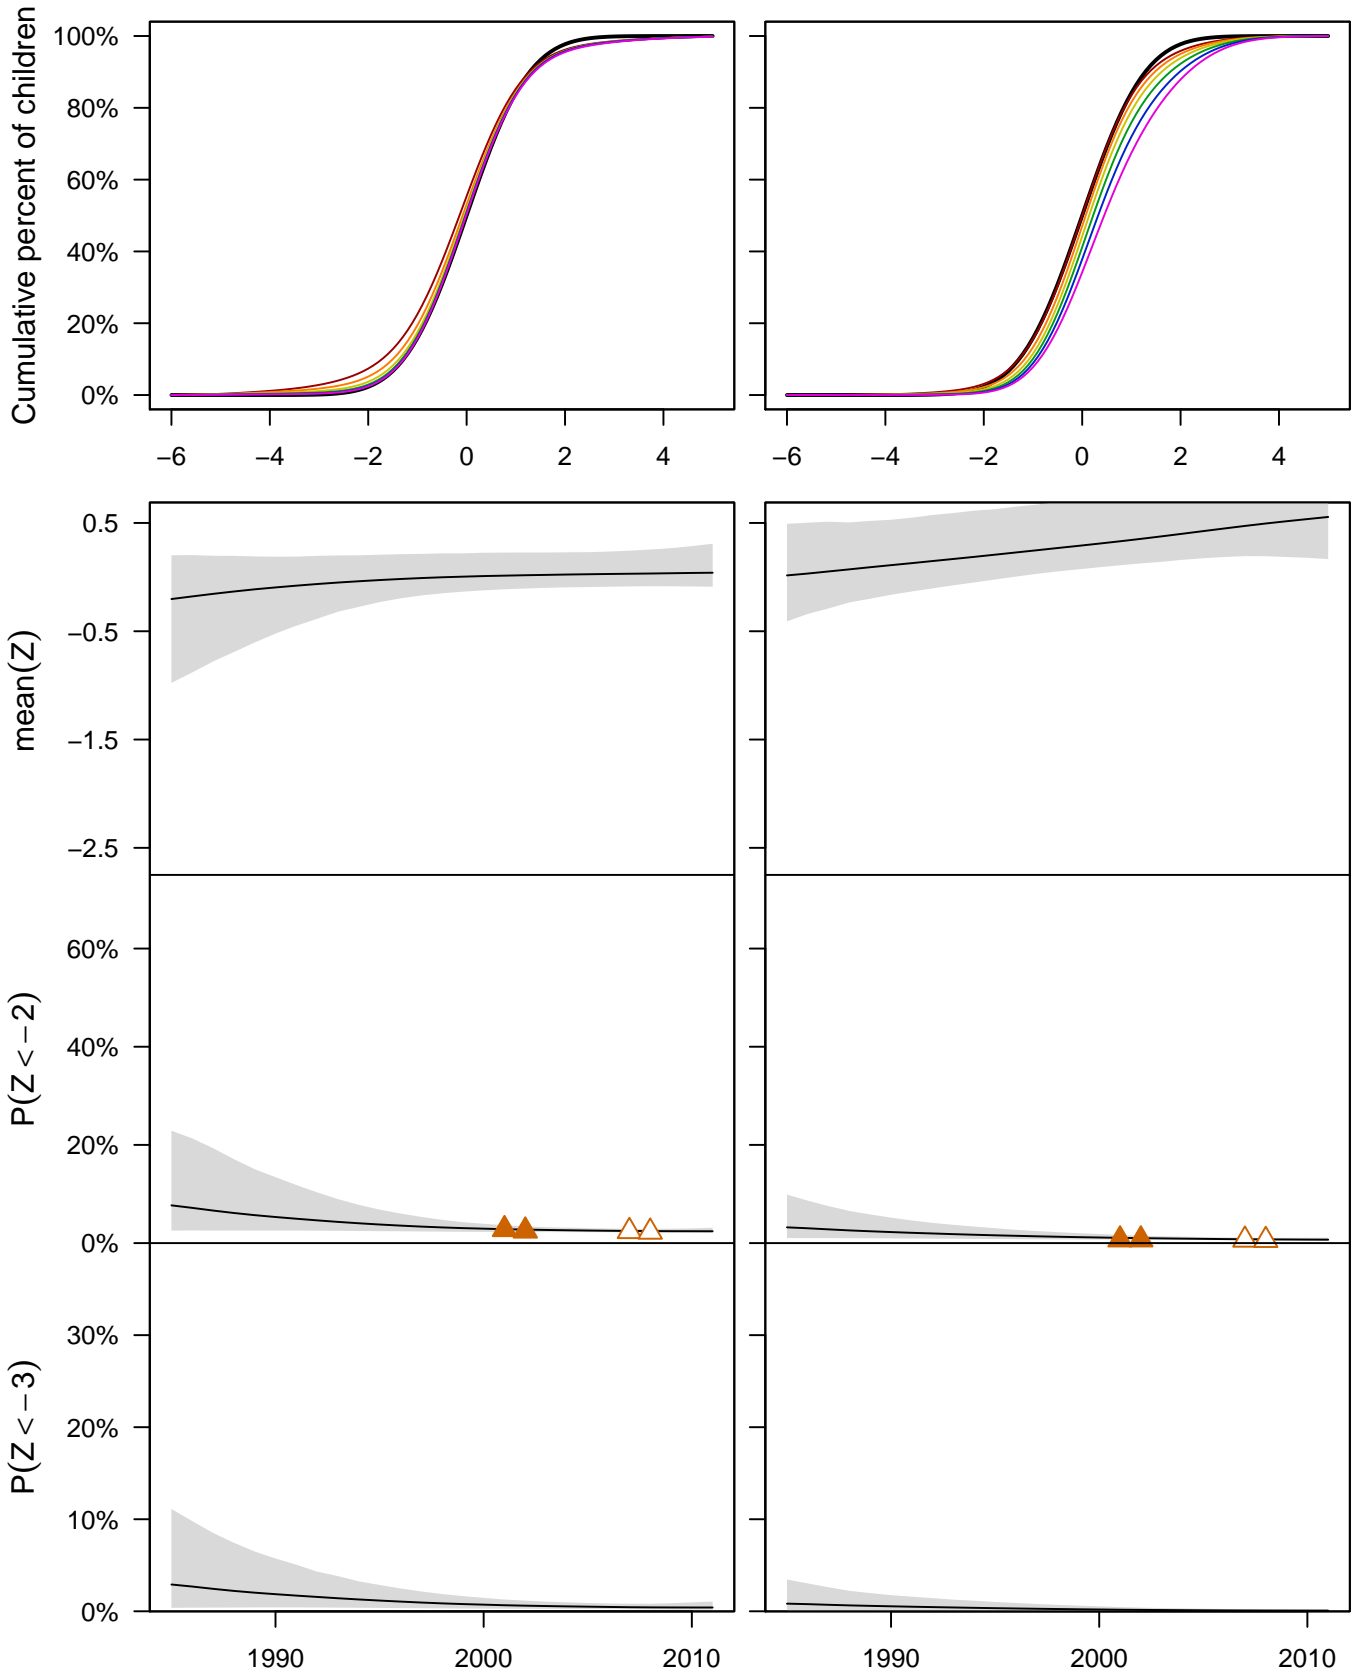

# China

East and Southeast Asia Region

HAZ

WAZ

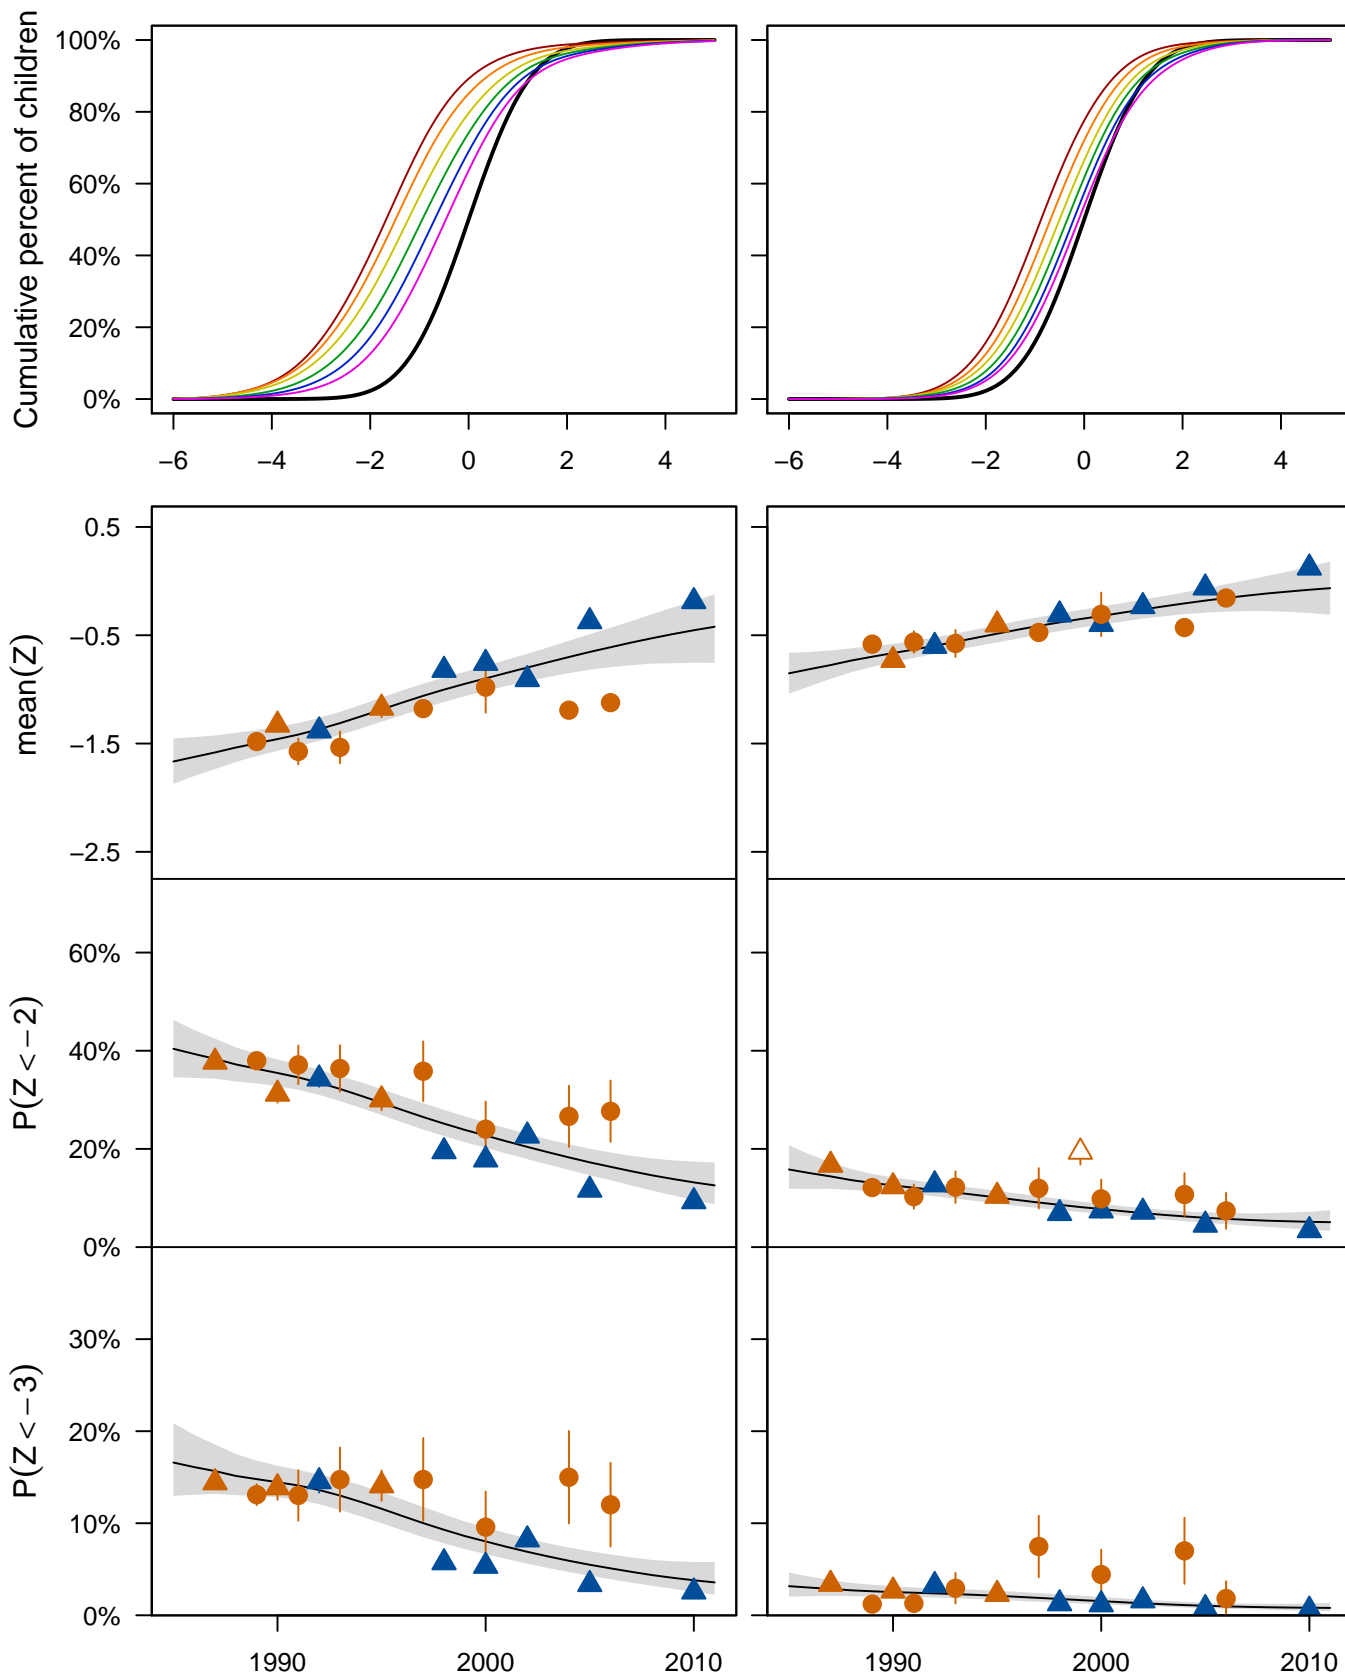

# China (Hong Kong SAR)

East and Southeast Asia Region

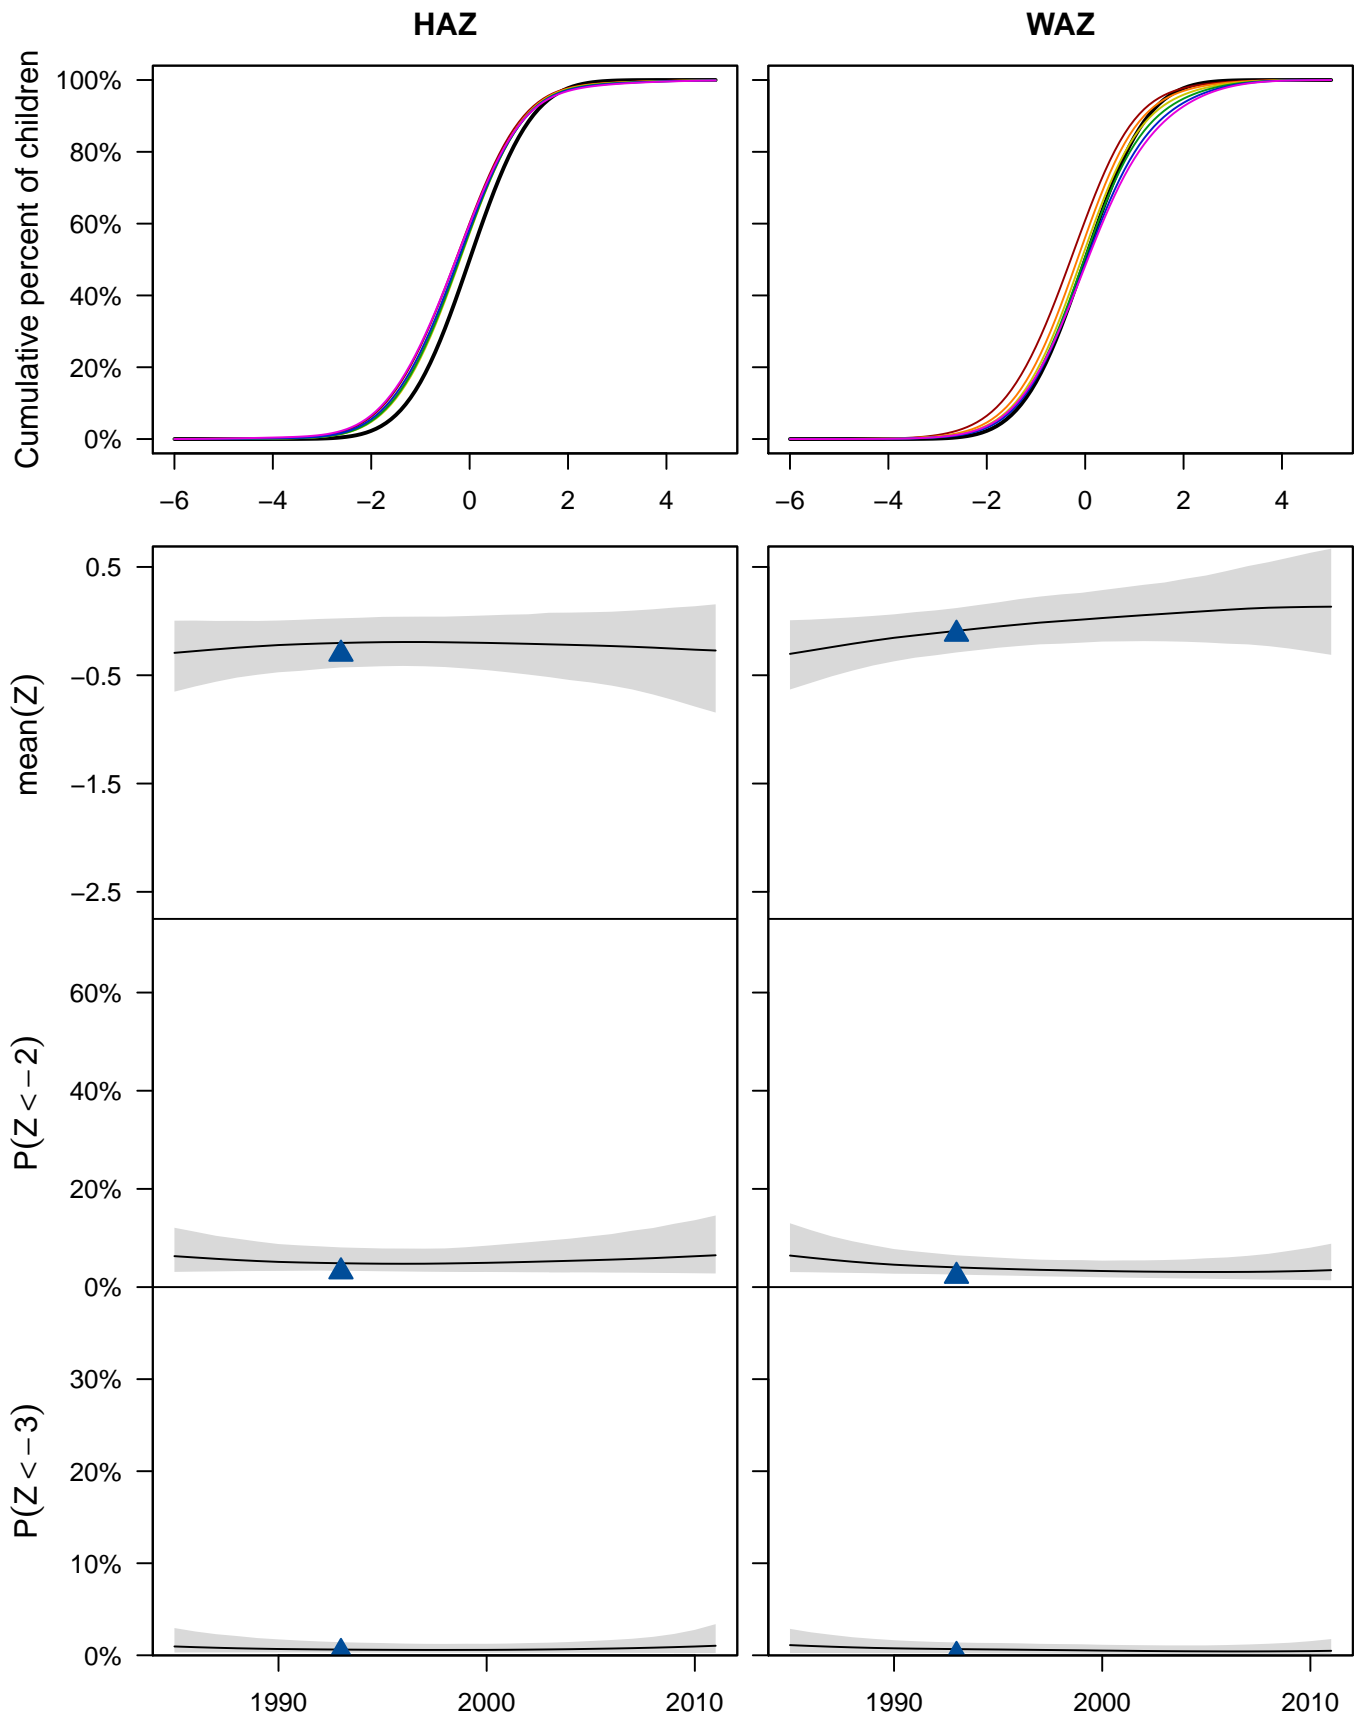

# China (Macao SAR)

East and Southeast Asia Region

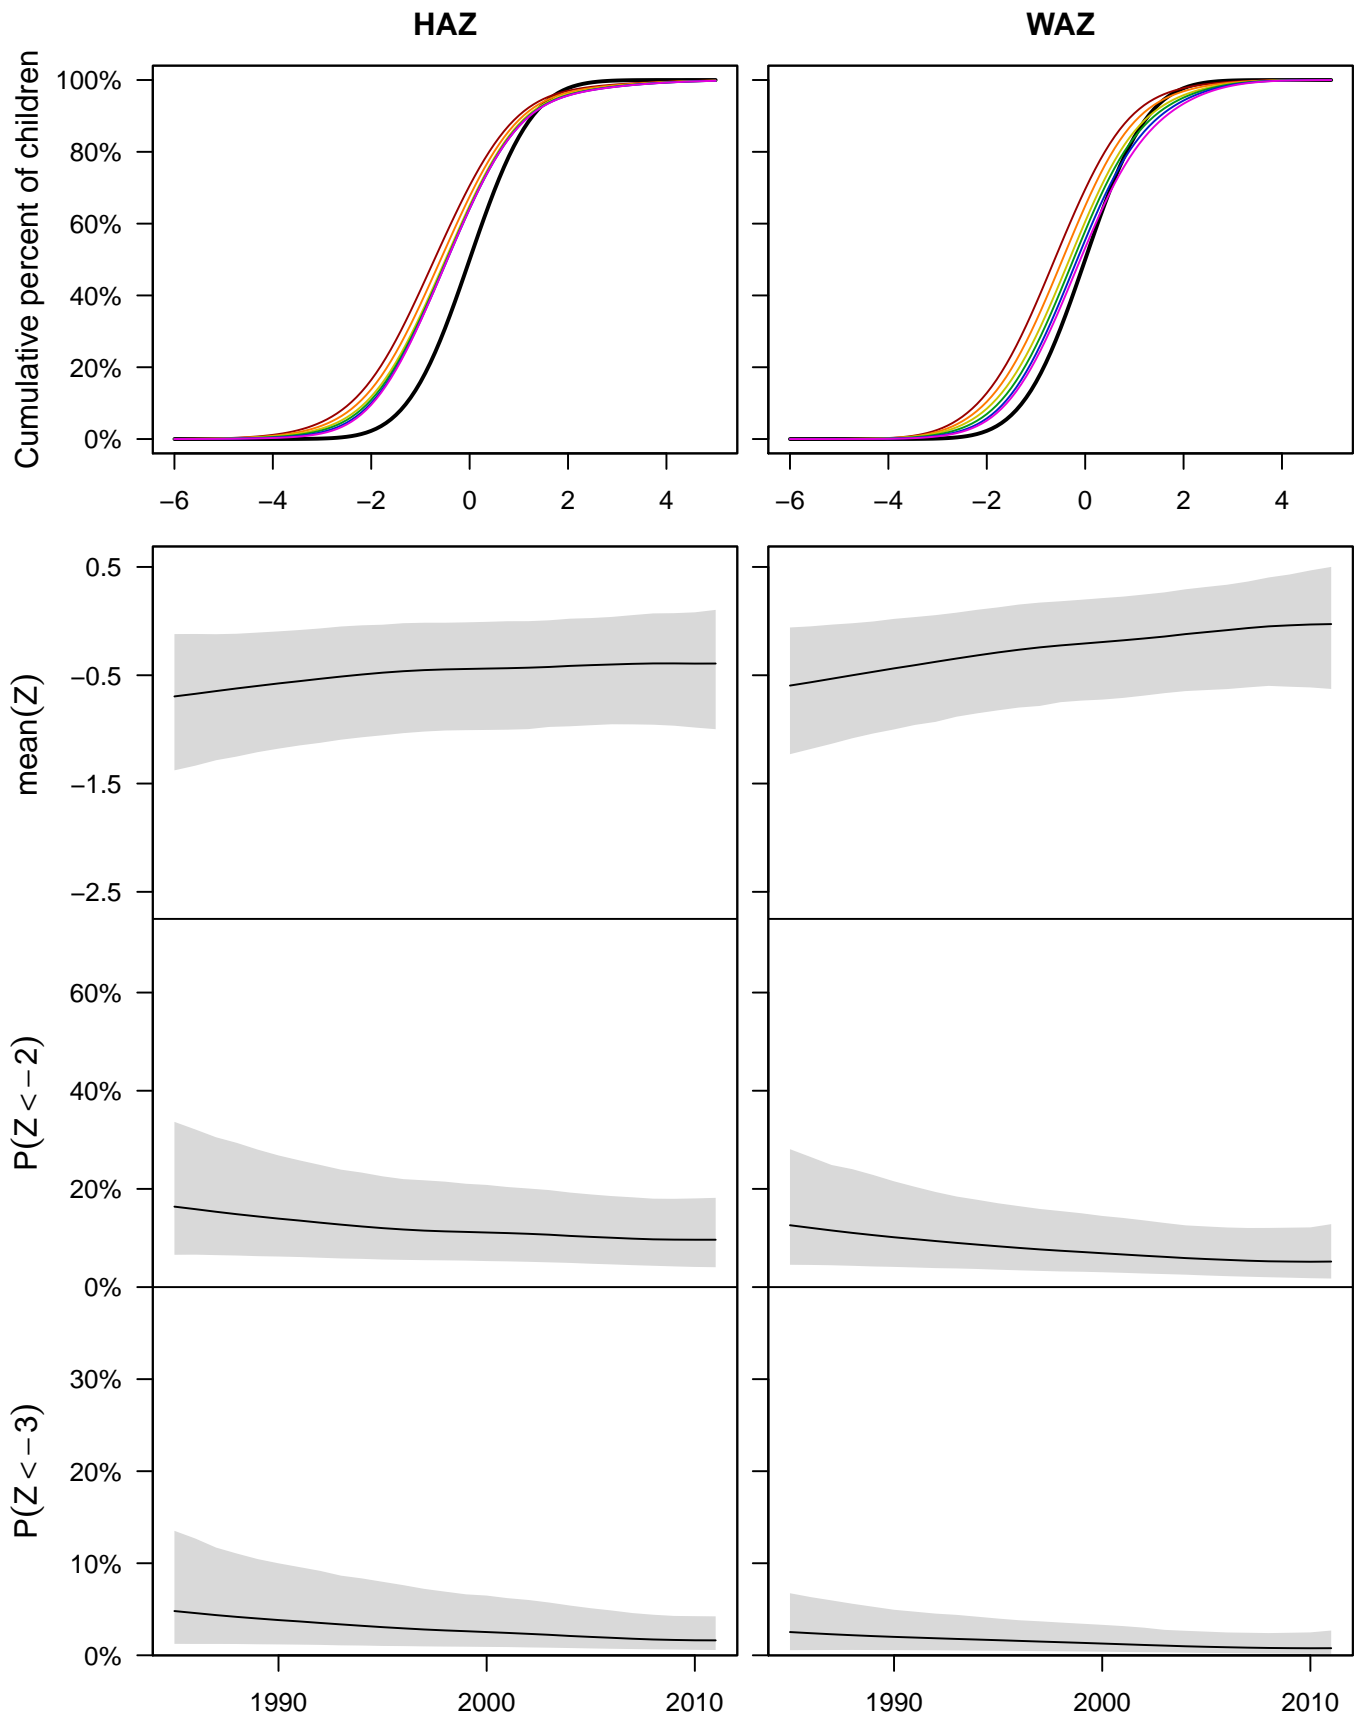



# Colombia

Andean and Central Latin America and Caribbean Region

HAZ

WAZ

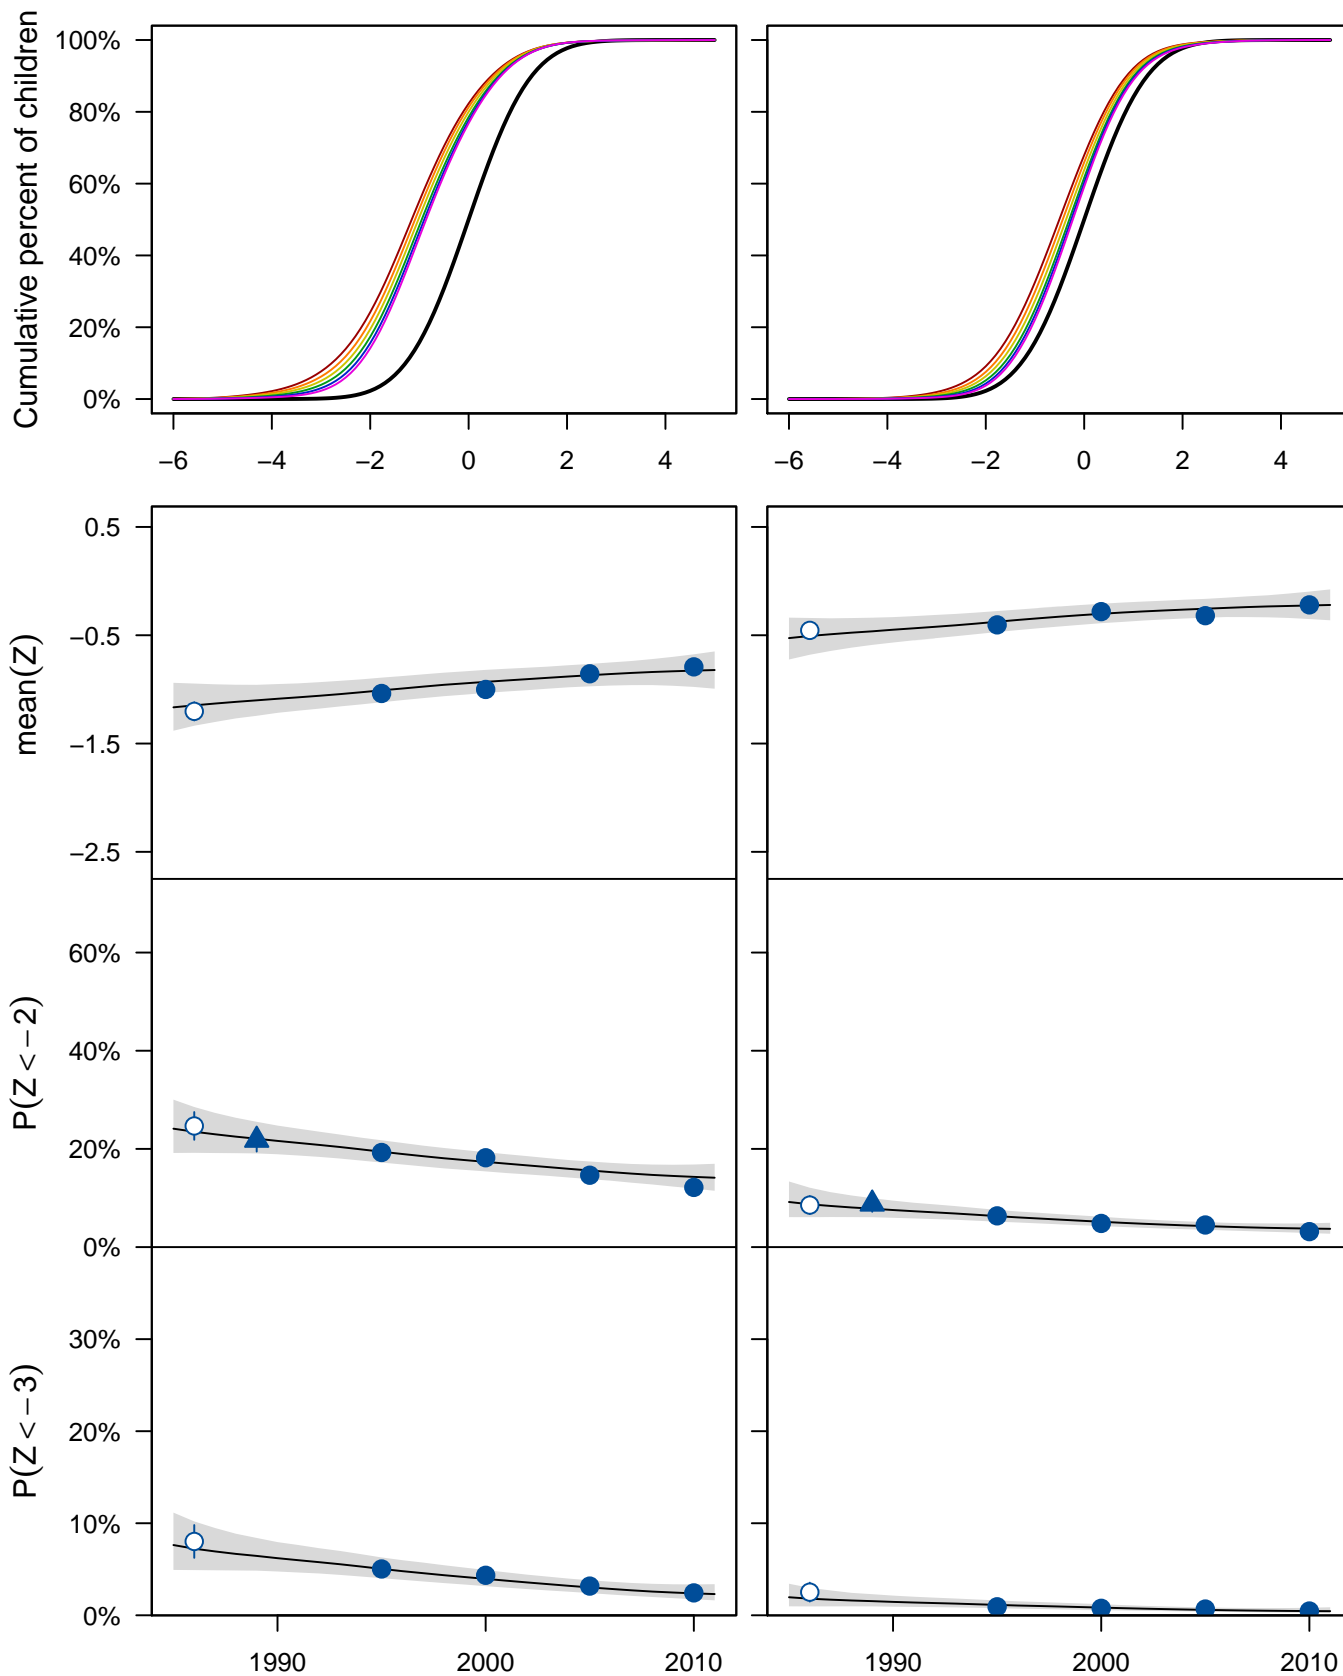

# Comoros

Sub-Saharan Africa Region

HAZ

WAZ

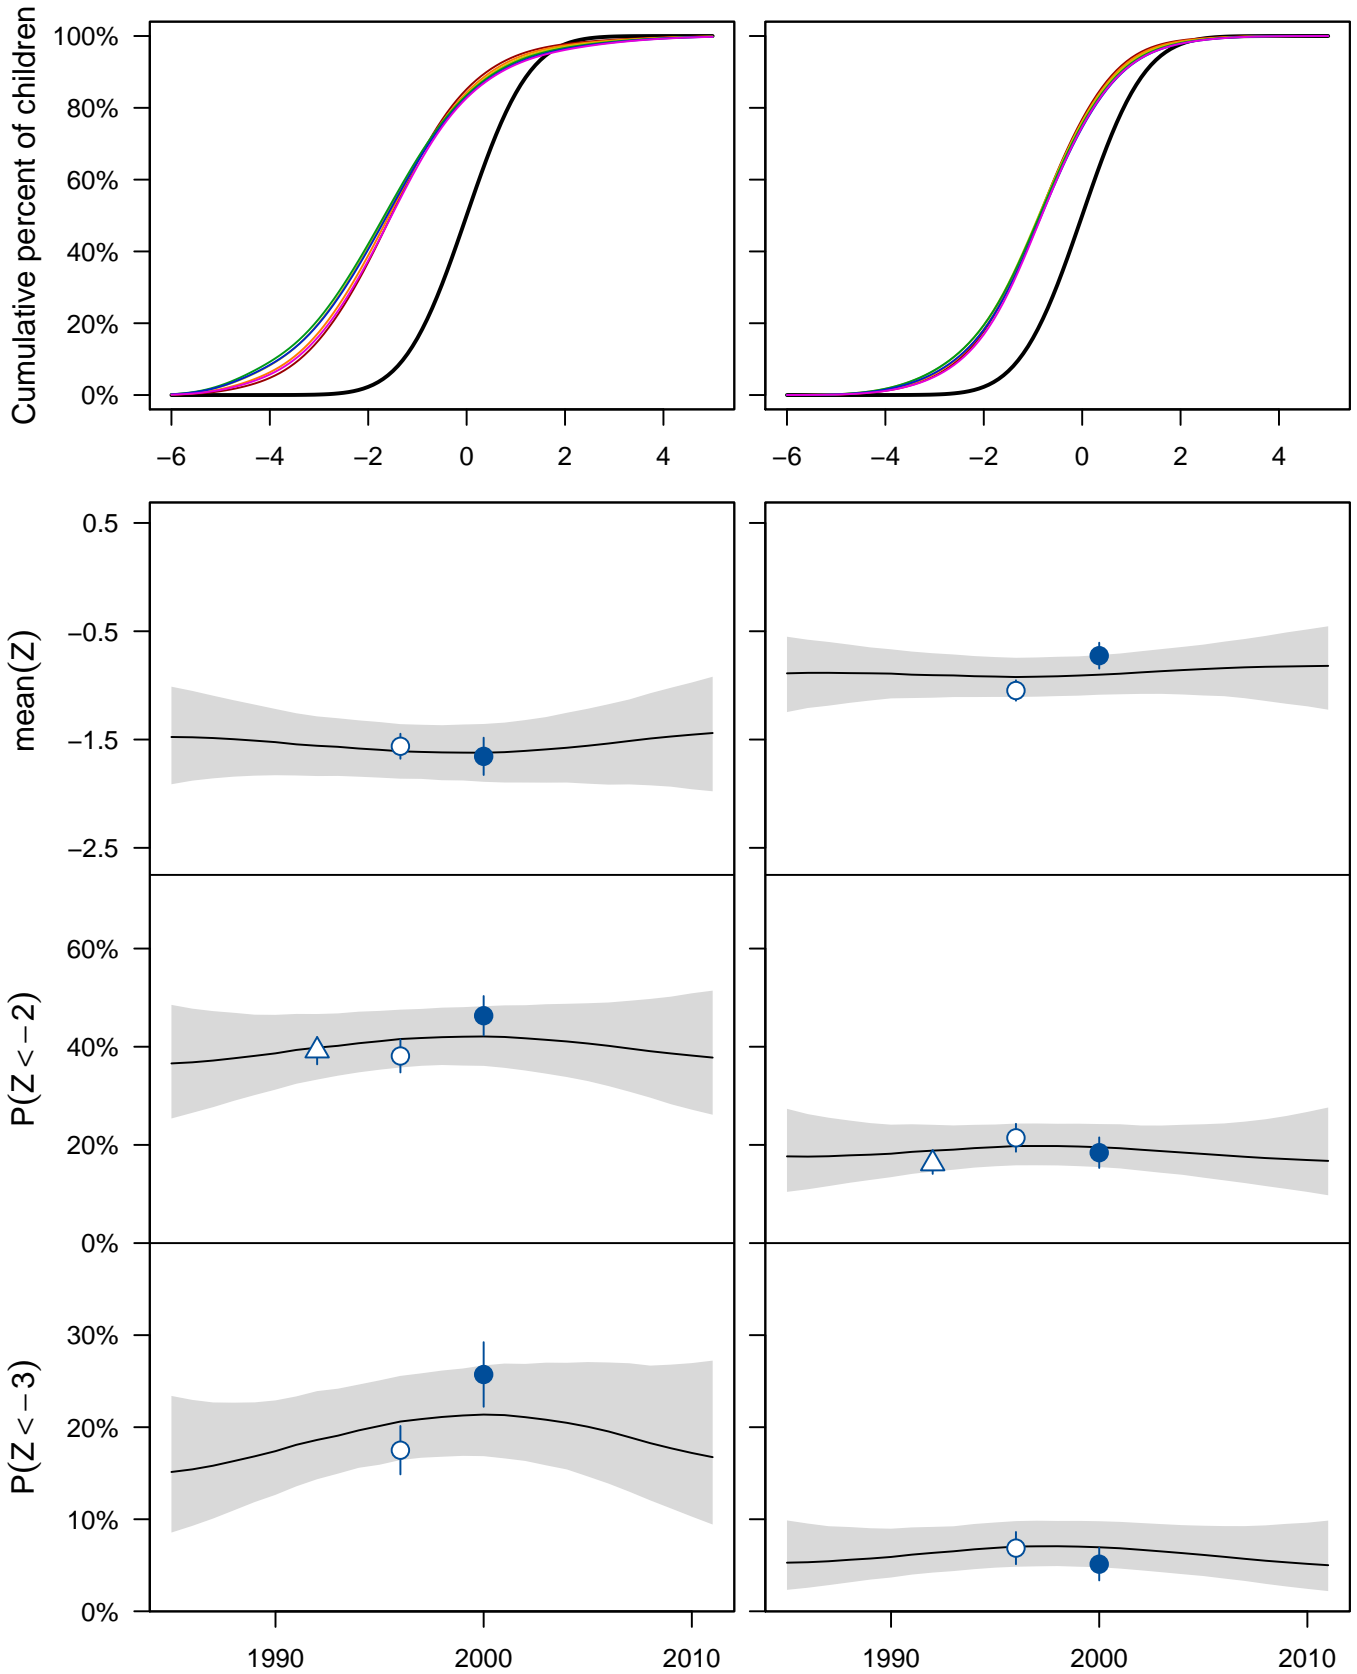

# Congo

## Sub-Saharan Africa Region

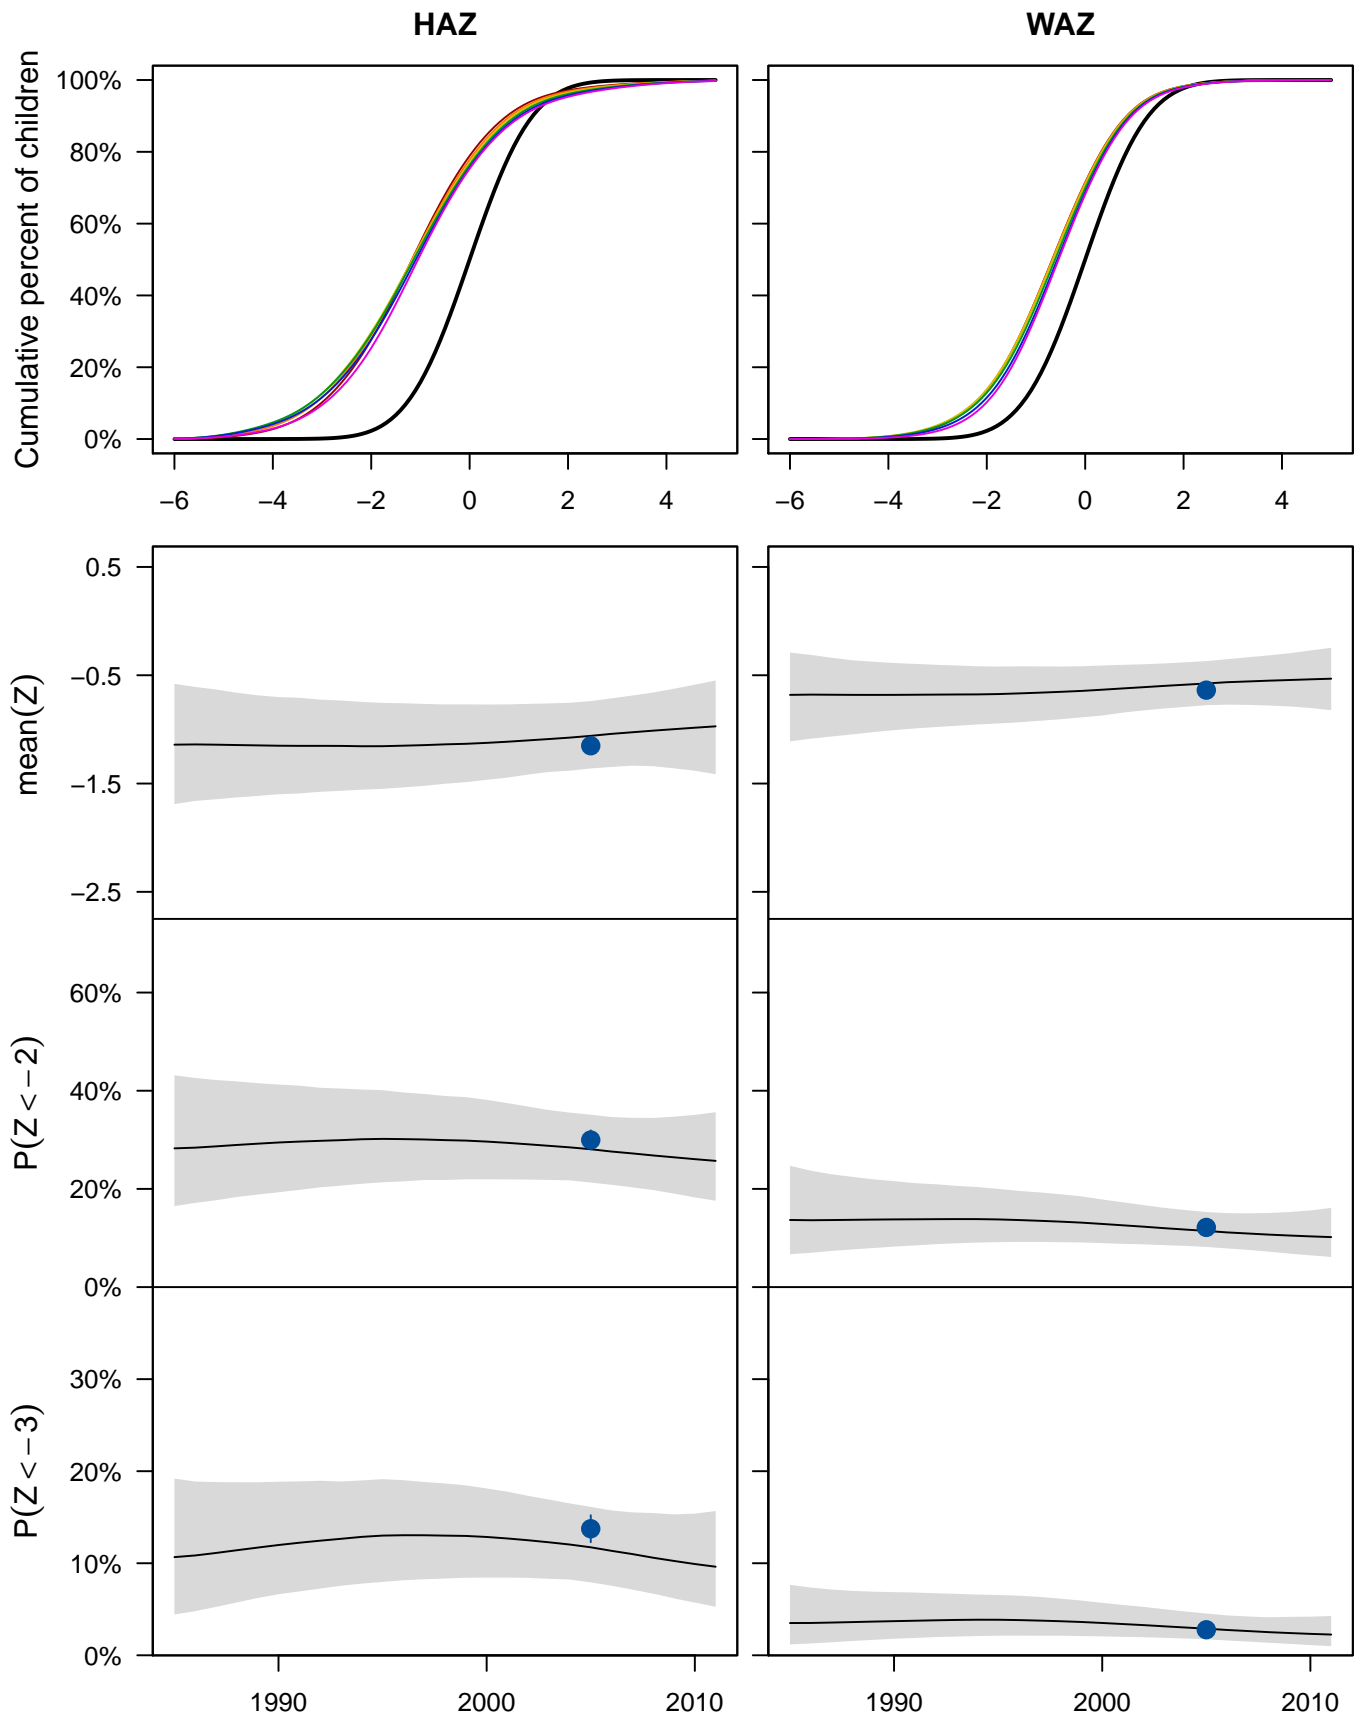

# Costa Rica

Andean and Central Latin America and Caribbean Region

HAZ

WAZ

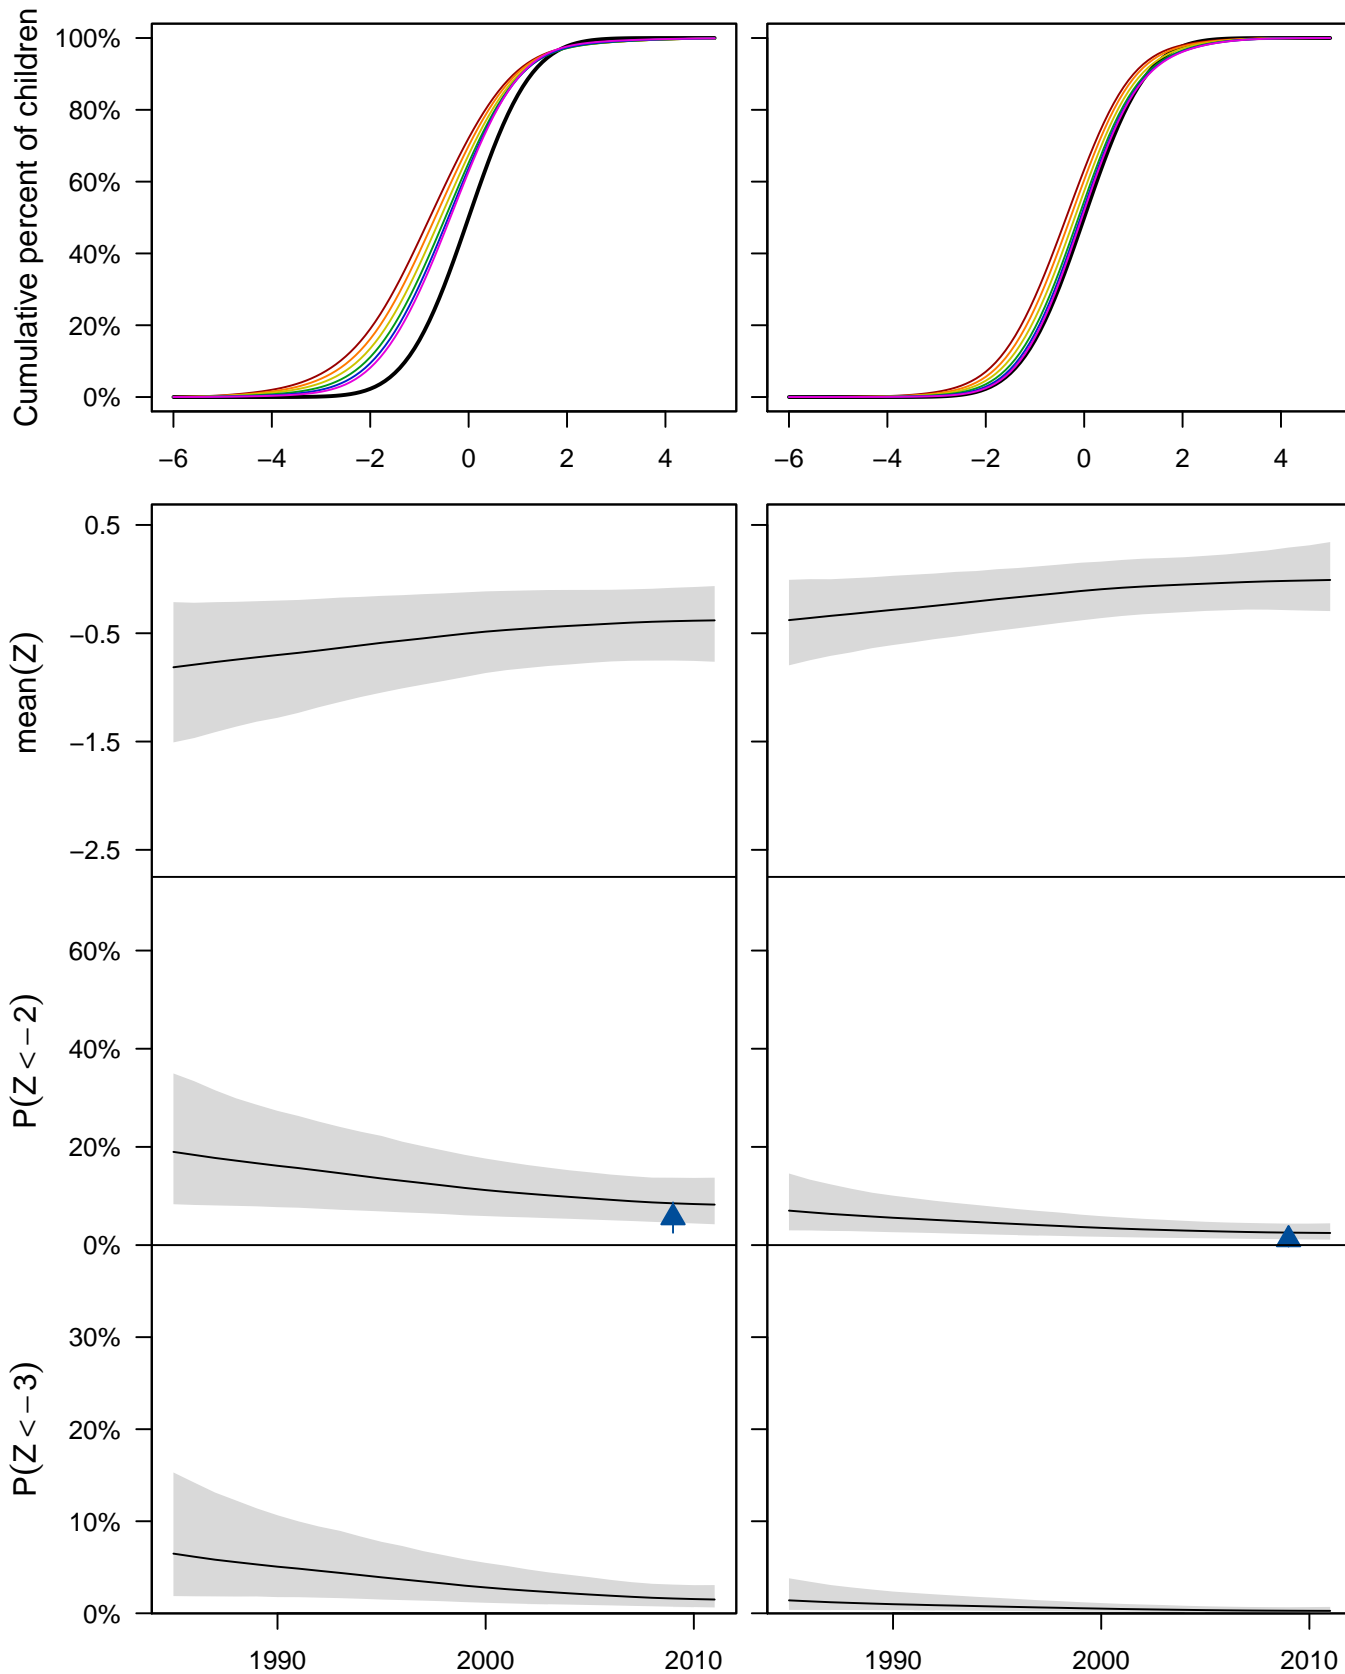

# Côte d'Ivoire

## Sub-Saharan Africa Region

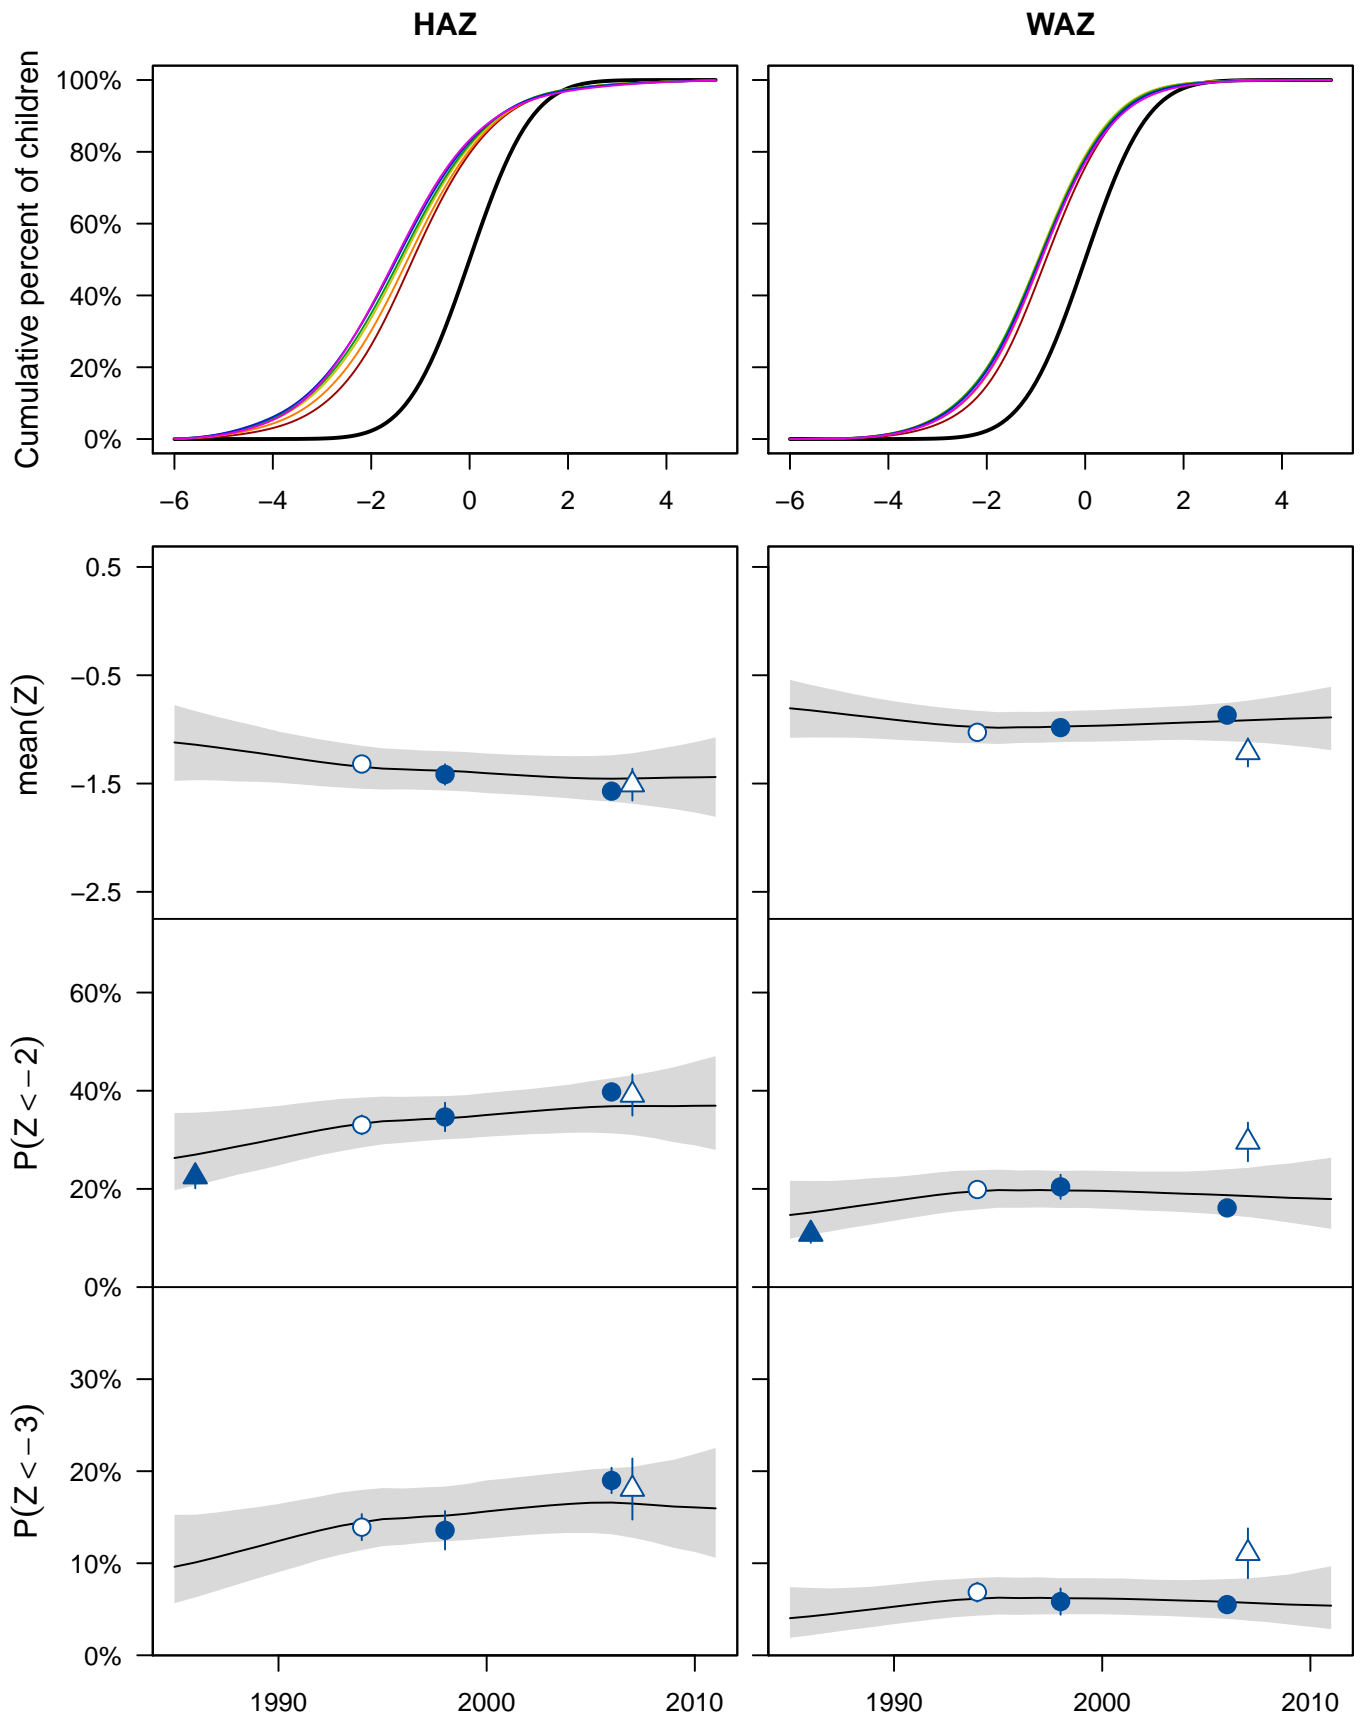

# Cuba

Andean and Central Latin America and Caribbean Region

HAZ

WAZ

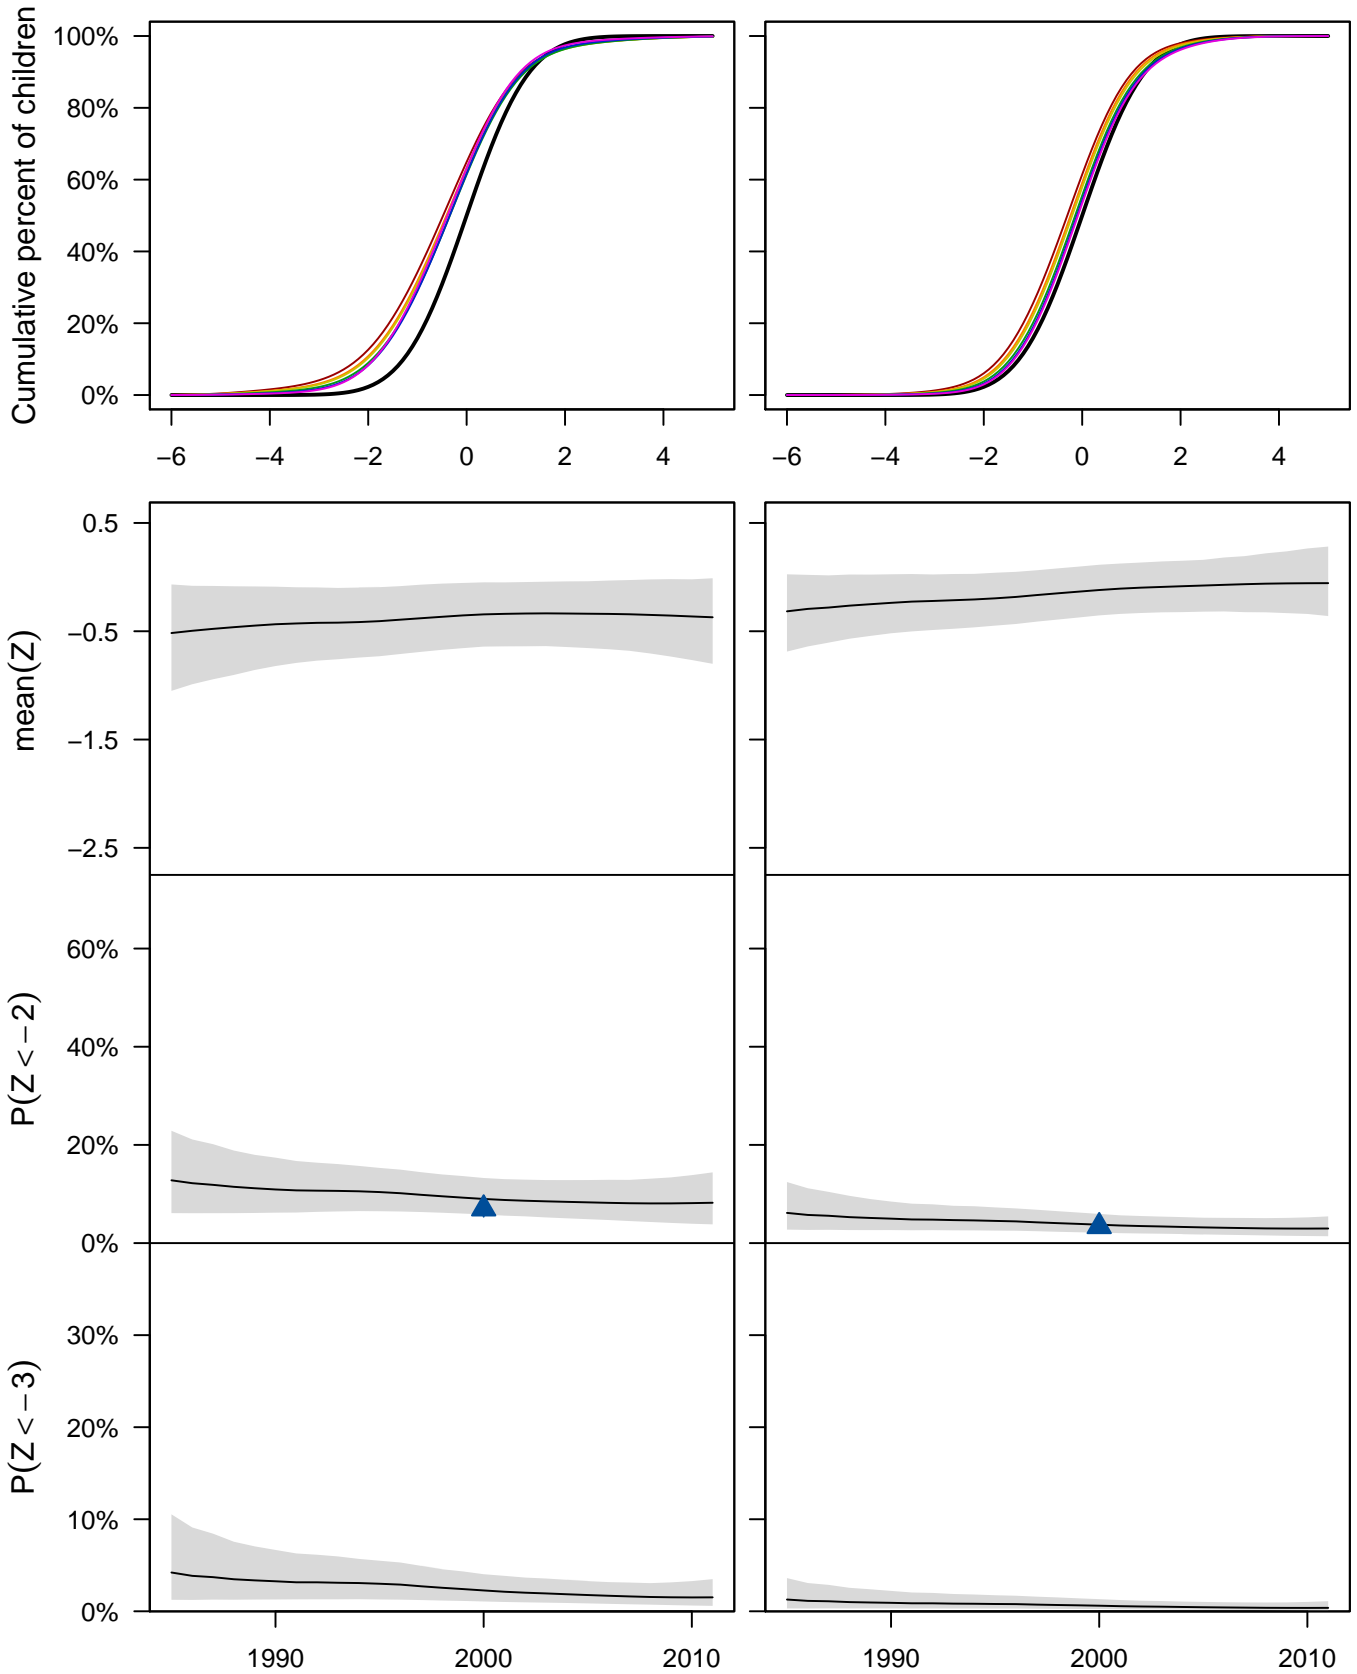

# Democratic People's Republic of Korea

East and Southeast Asia Region

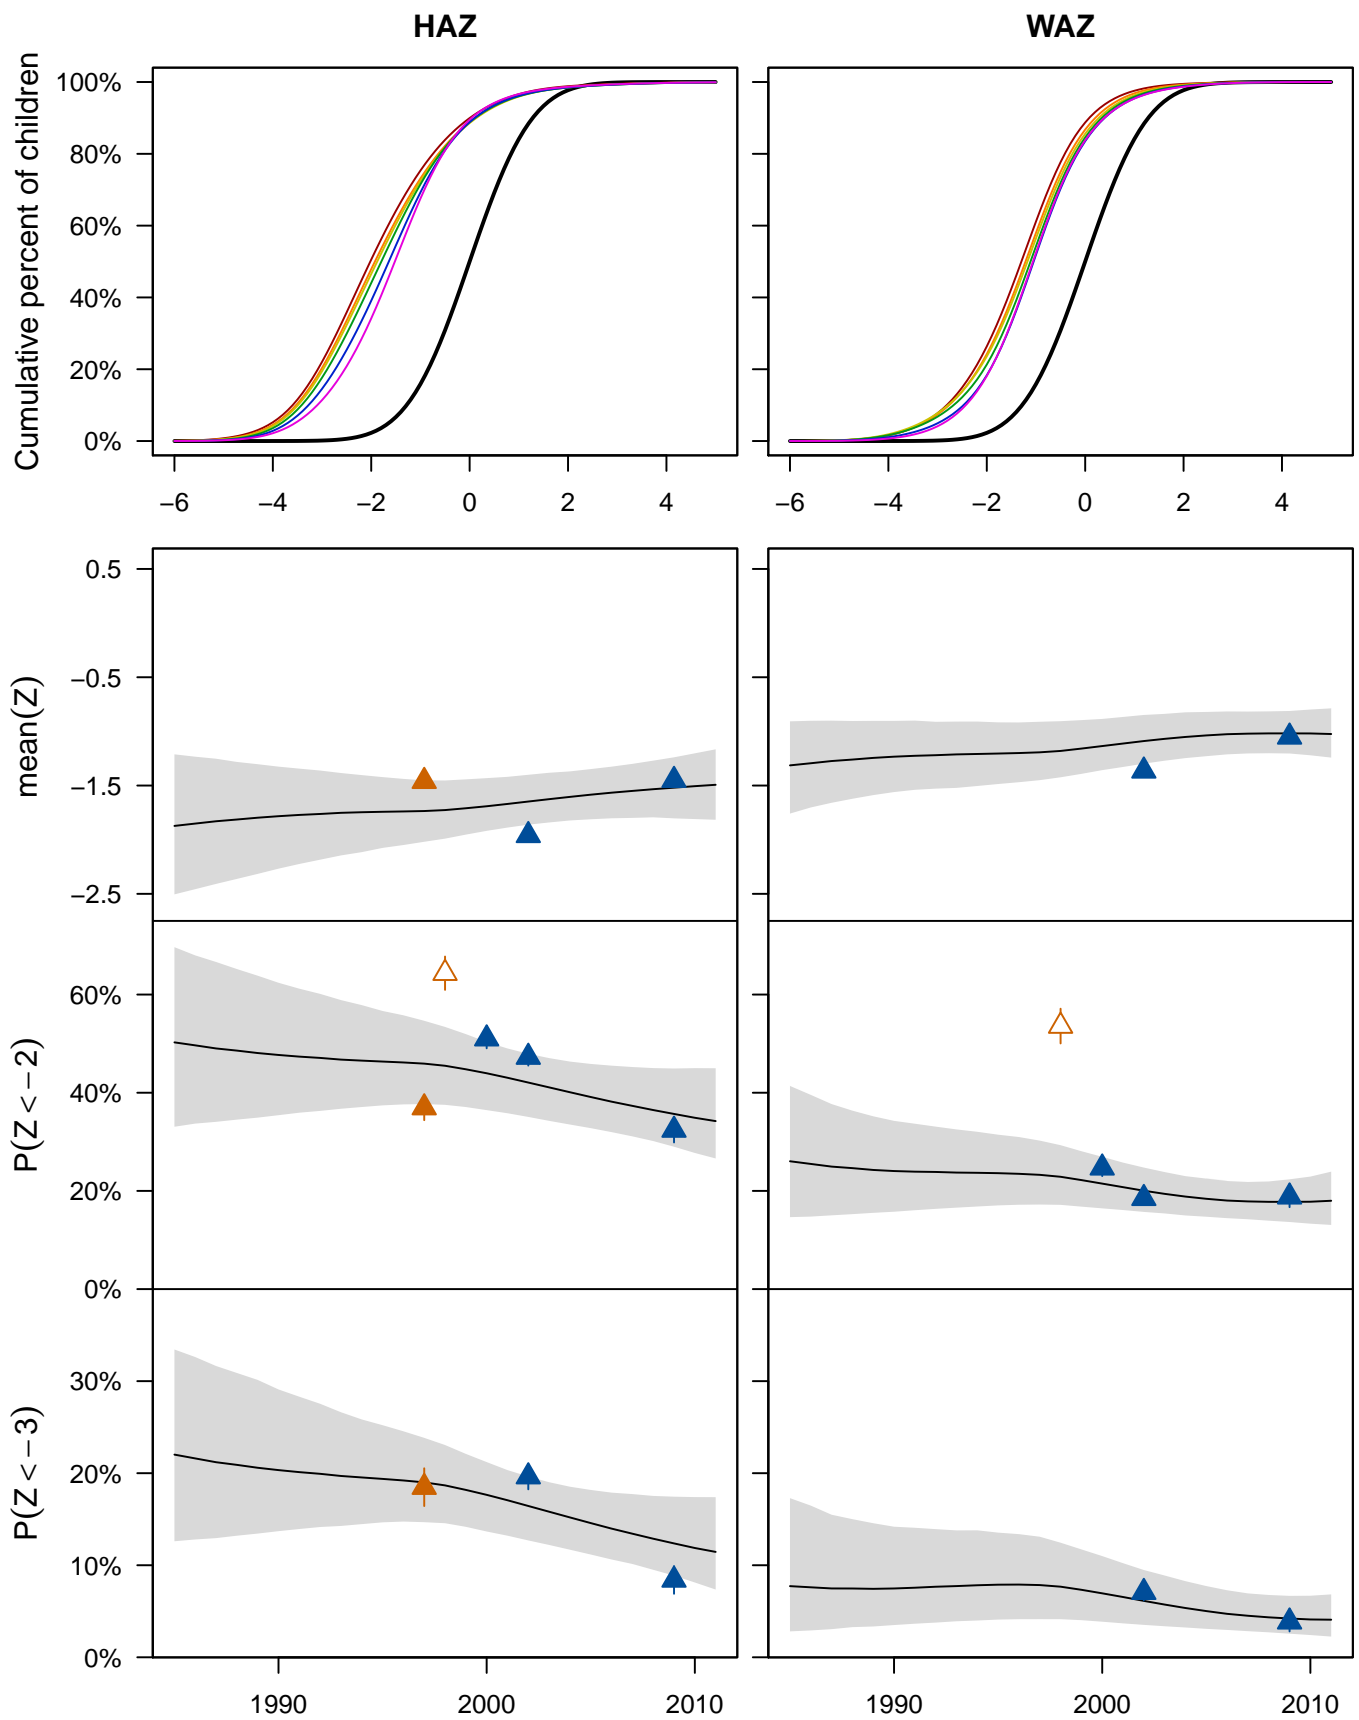

# Democratic Republic of the Congo

Sub-Saharan Africa Region

HAZ

WAZ

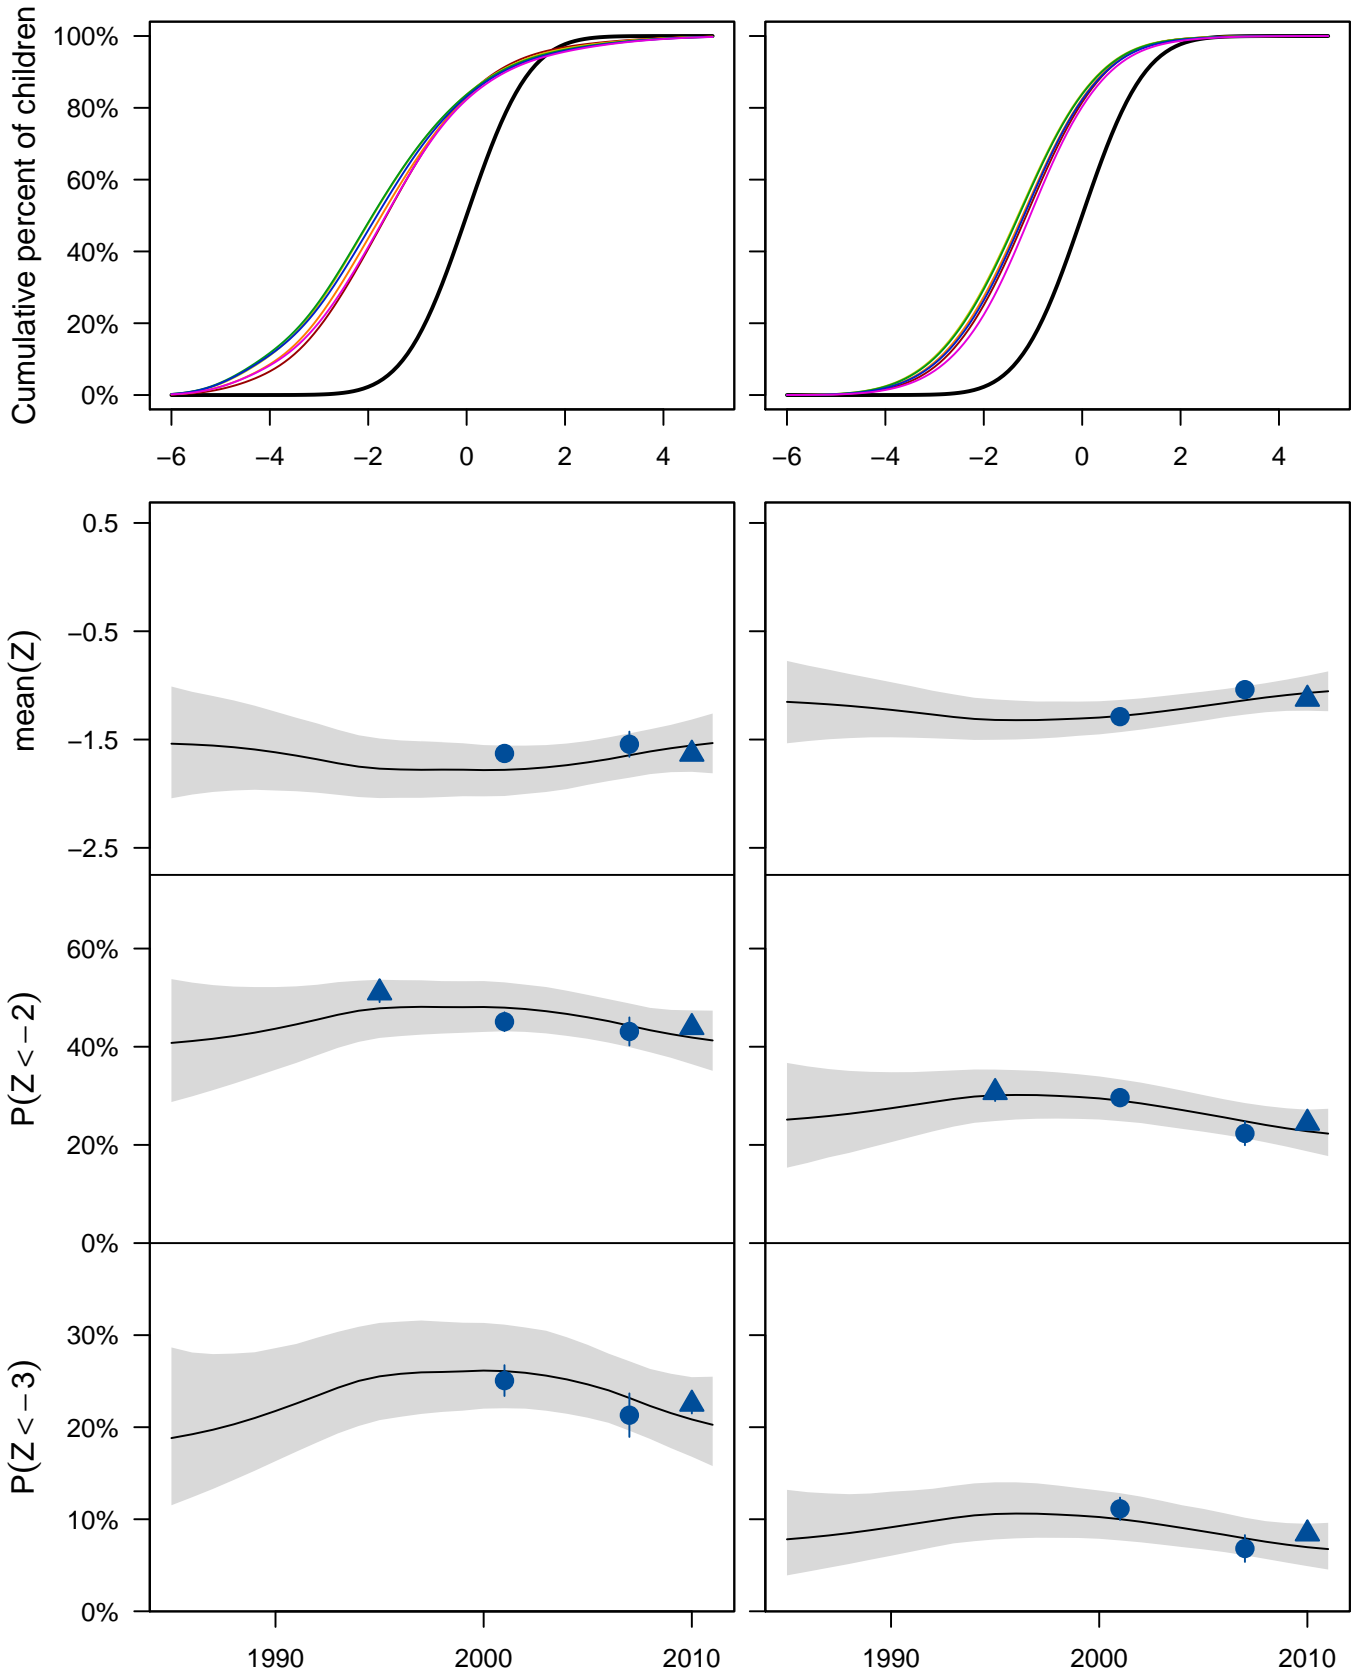



# Djibouti

## Sub-Saharan Africa Region

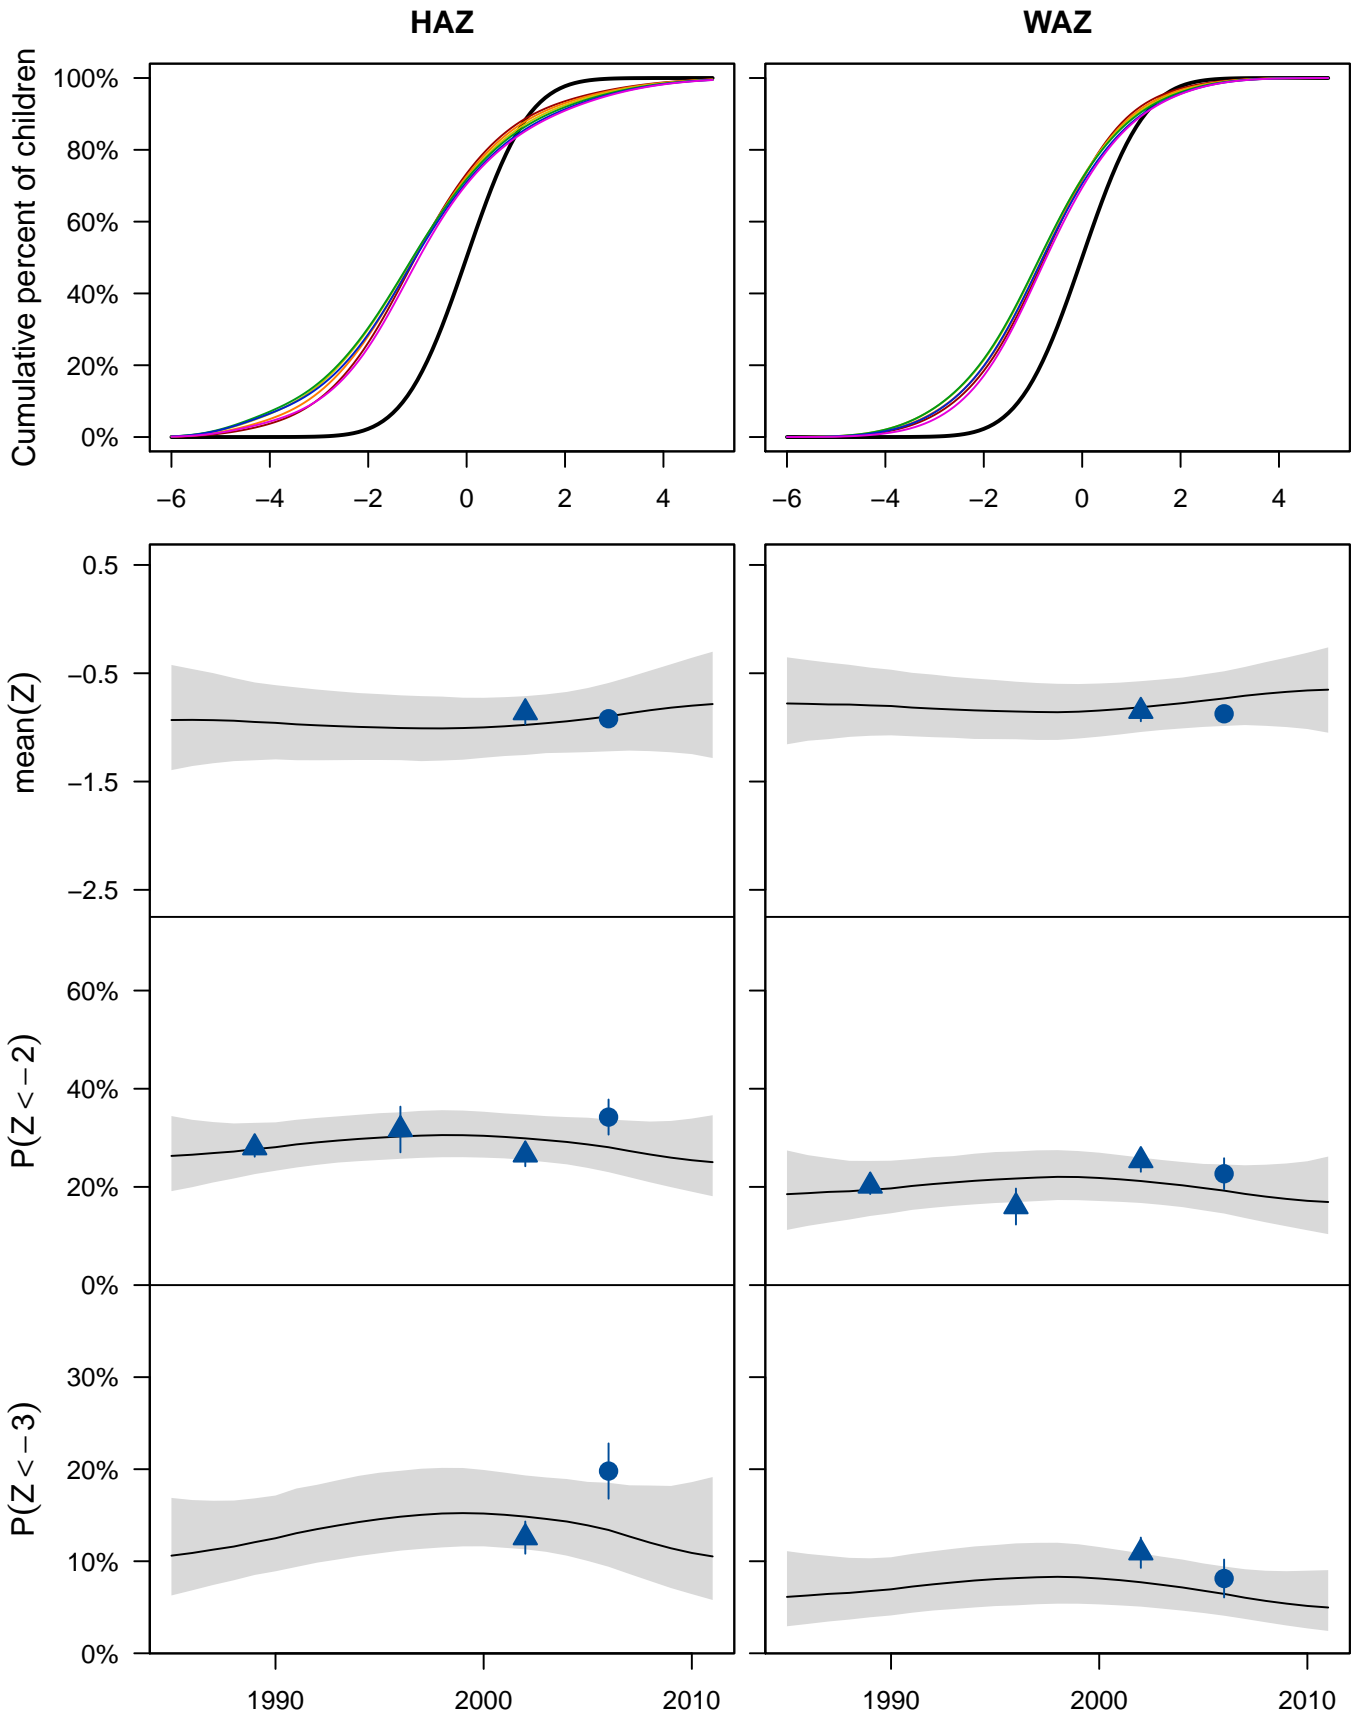

# Dominica

Andean and Central Latin America and Caribbean Region

HAZ

WAZ

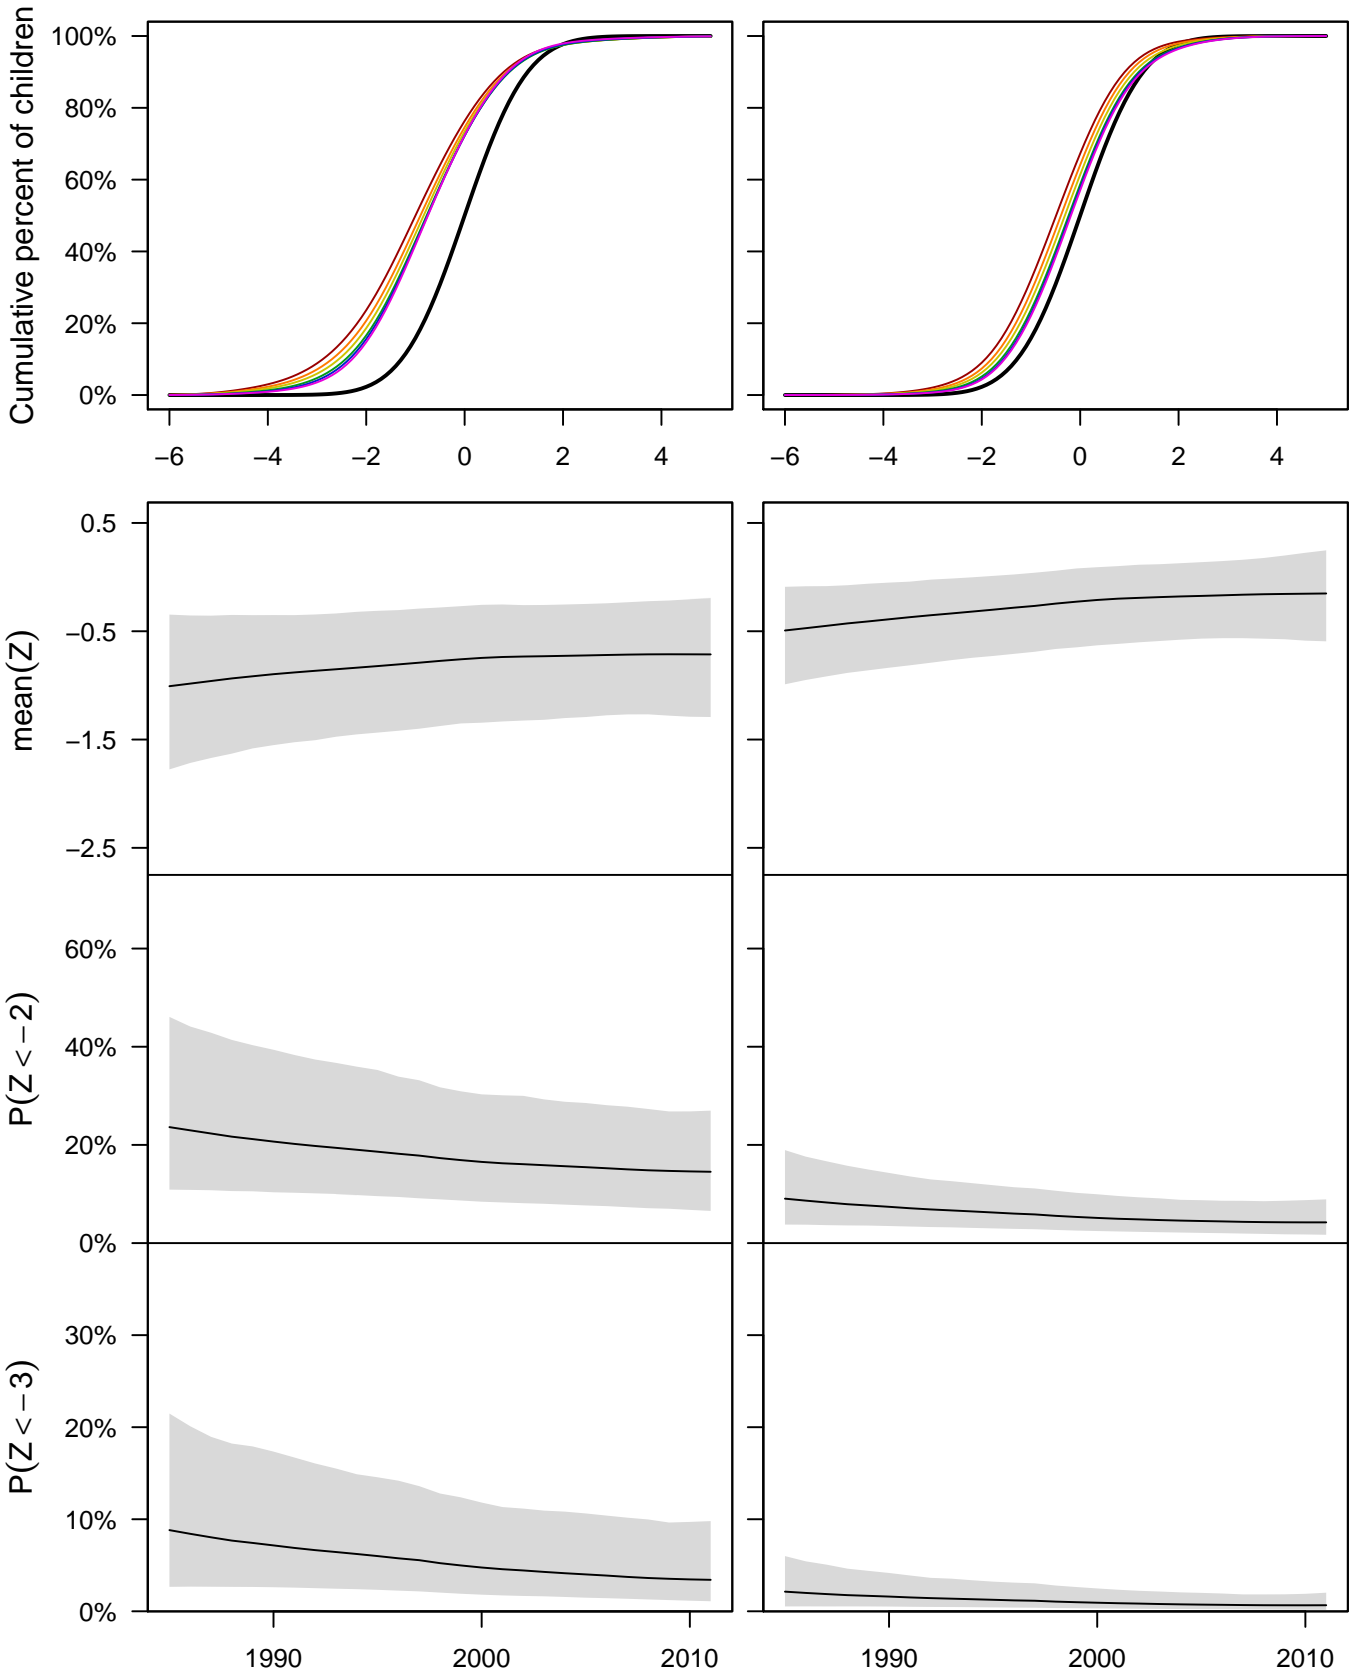

# Dominican Republic

Andean and Central Latin America and Caribbean Region

HAZ

WAZ

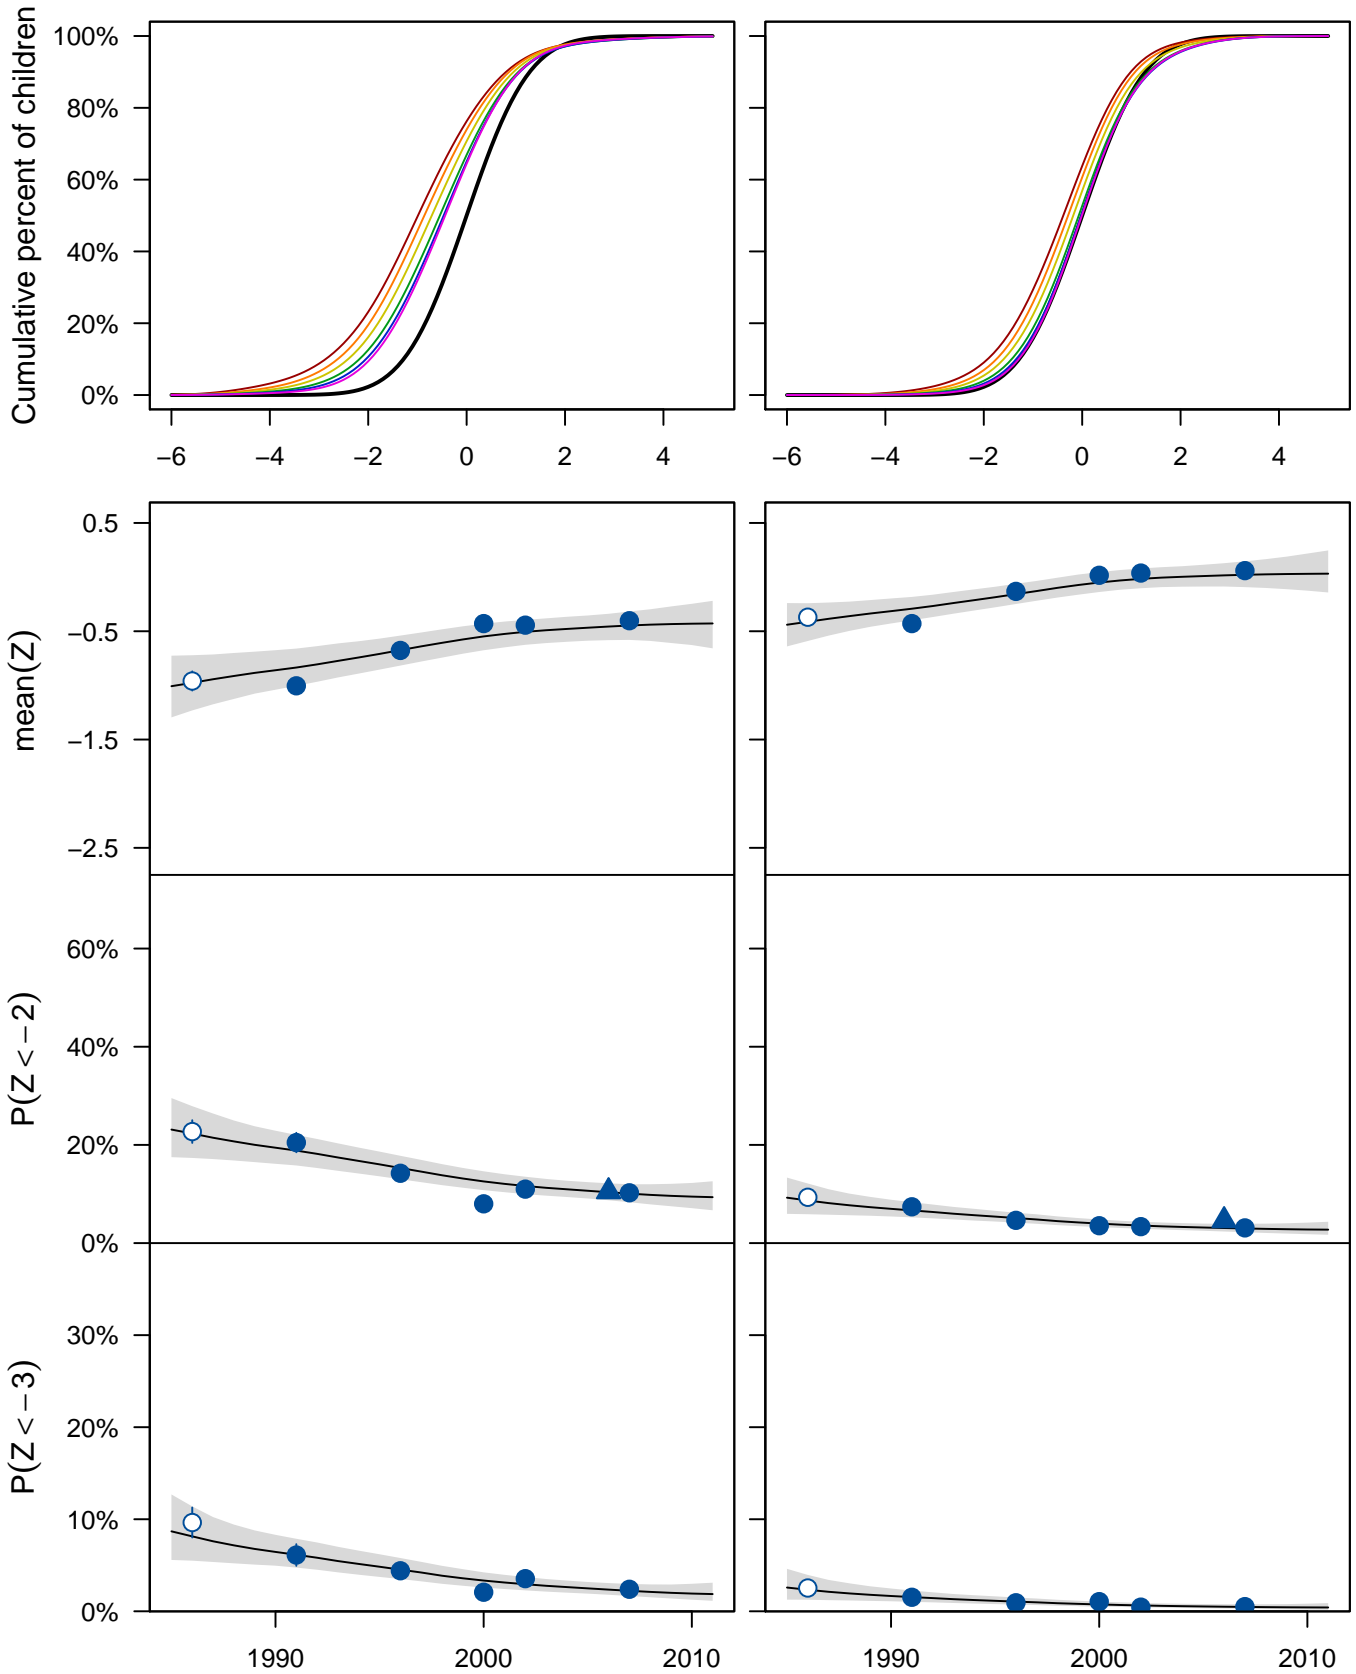

# Ecuador

Andean and Central Latin America and Caribbean Region

HAZ

WAZ

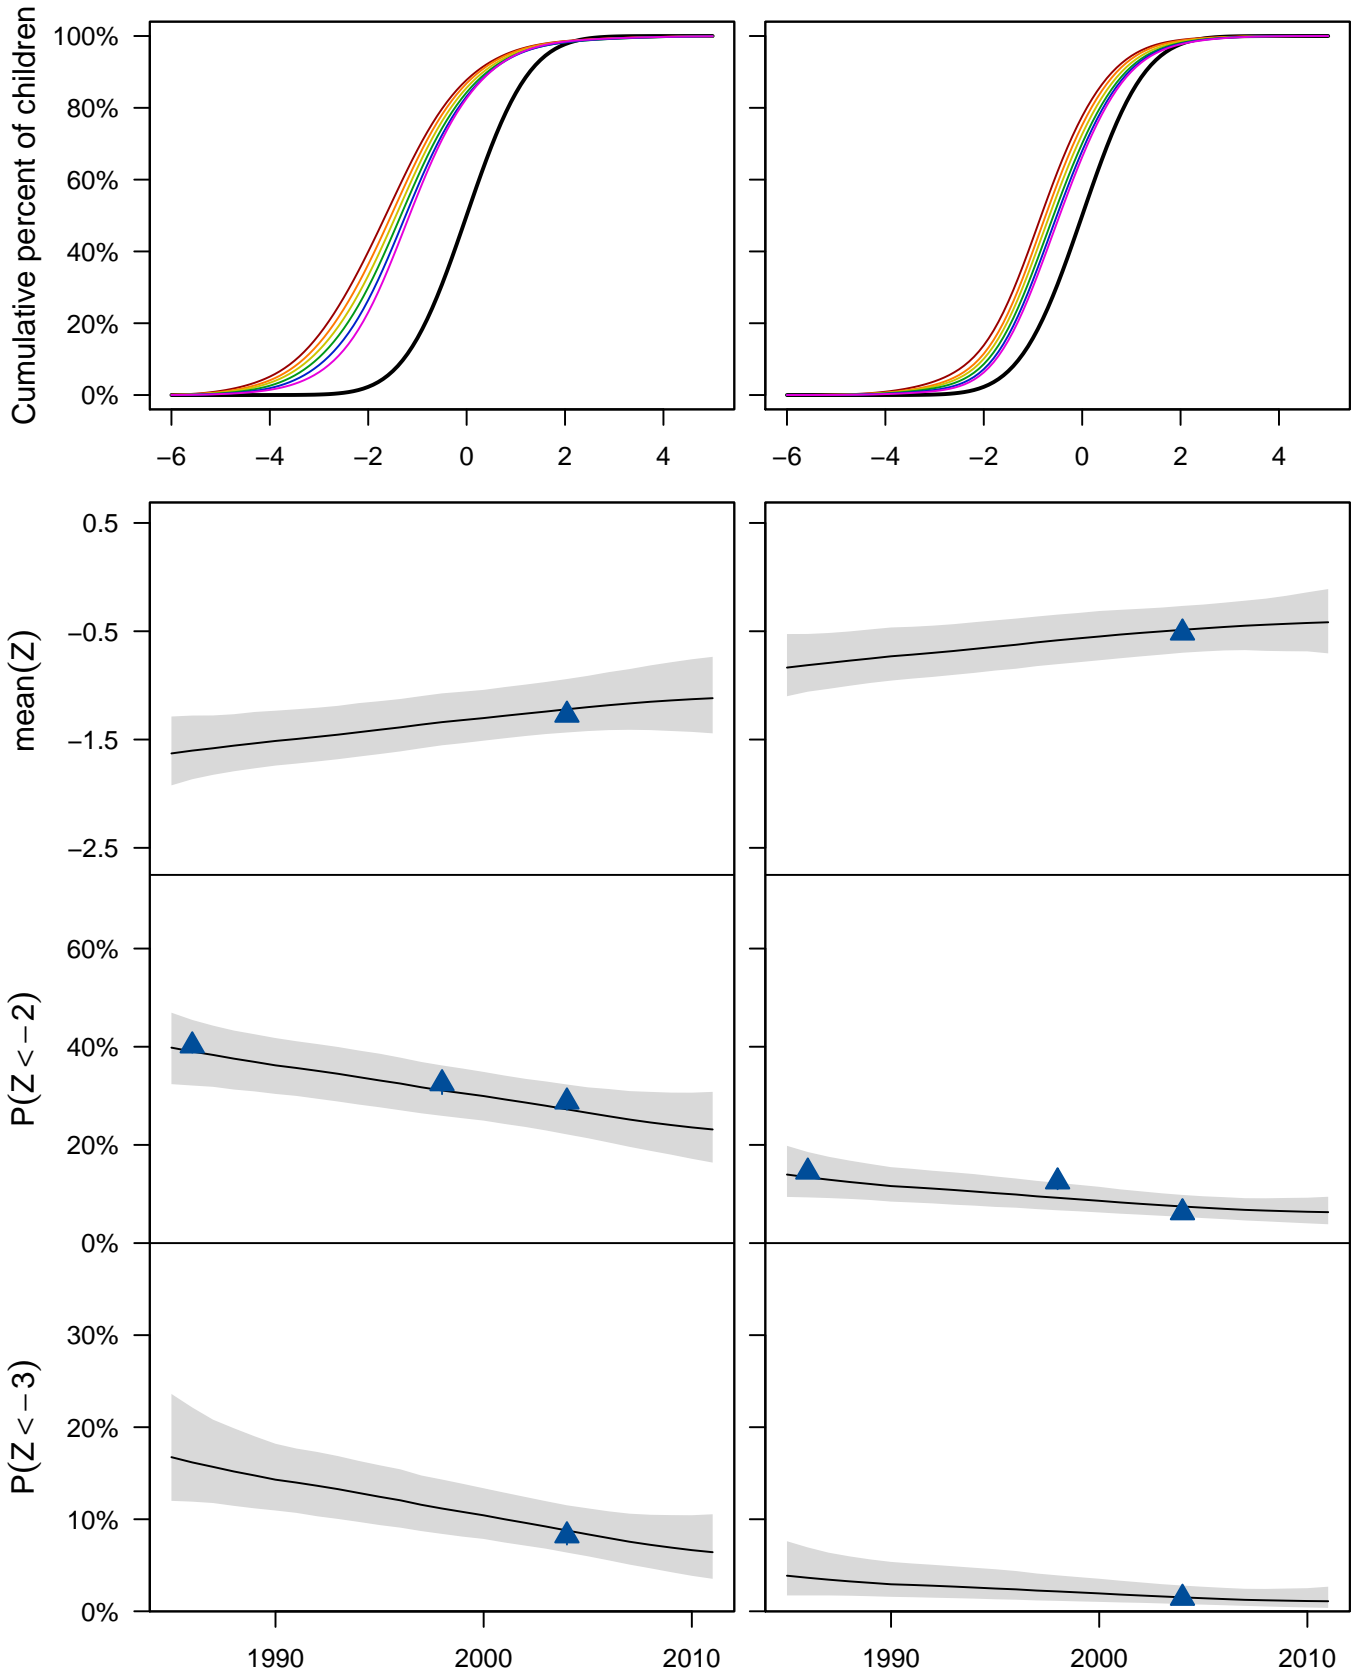

# Egypt

Central Asia, Middle East, and North Africa Region

HAZ

WAZ

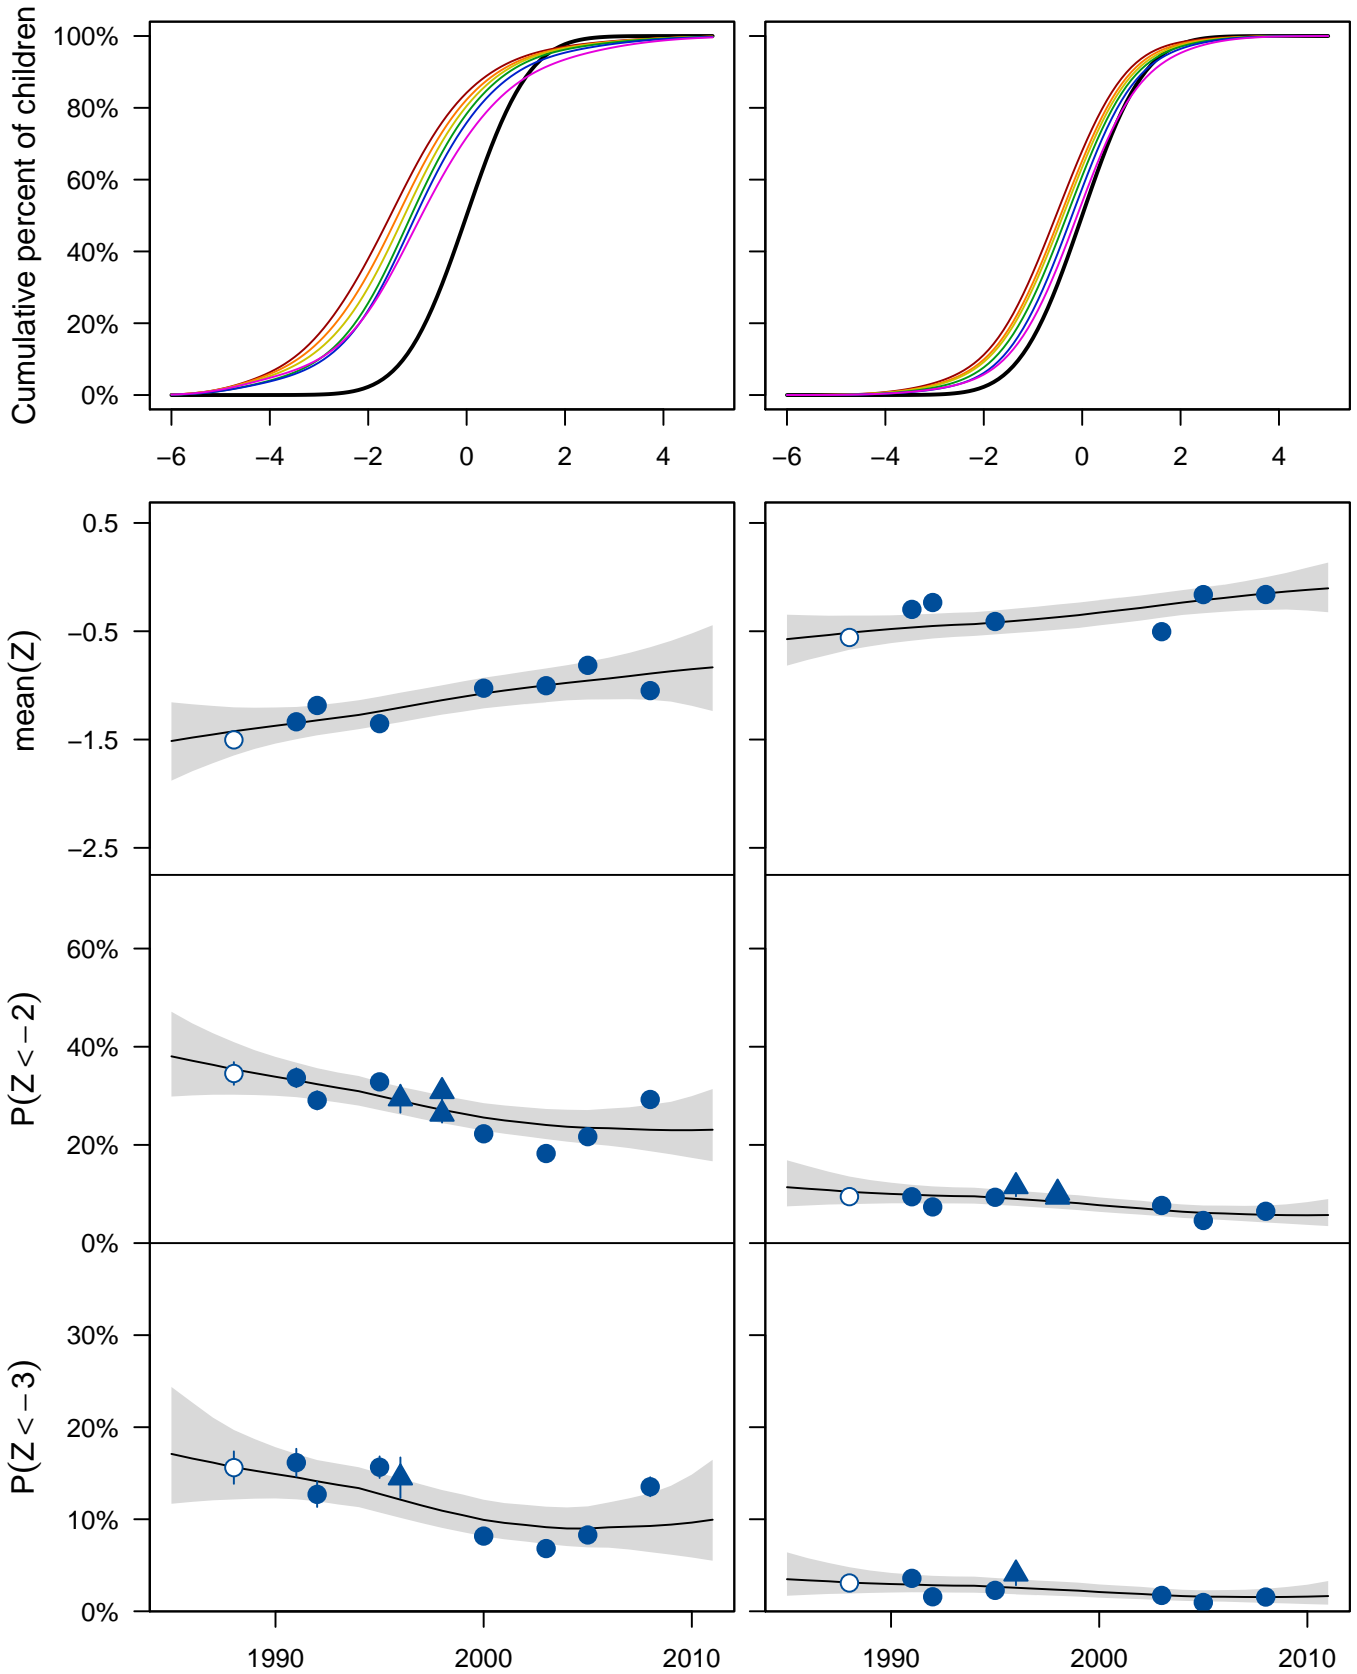

# El Salvador

Andean and Central Latin America and Caribbean Region

HAZ

WAZ

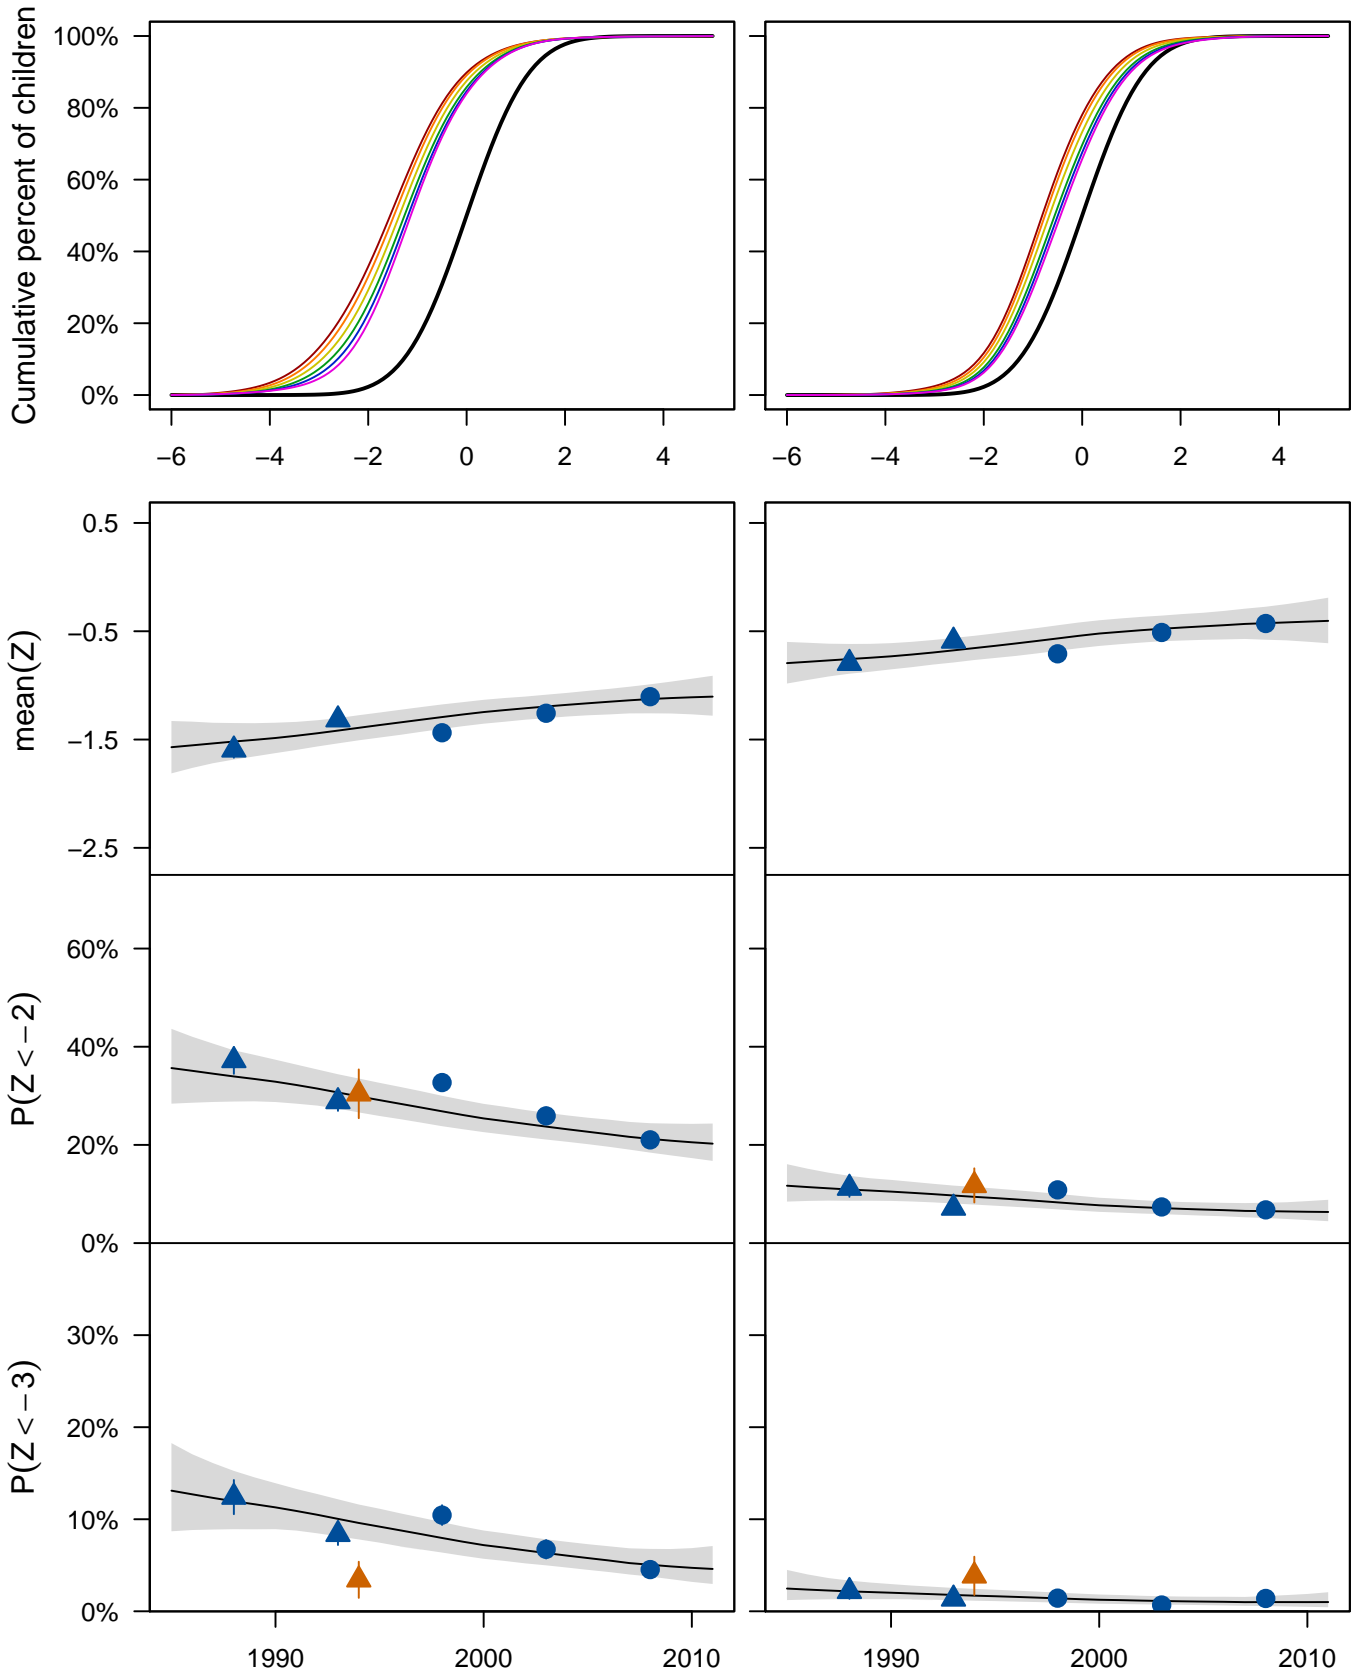

# Equatorial Guinea

Sub-Saharan Africa Region

HAZ

WAZ

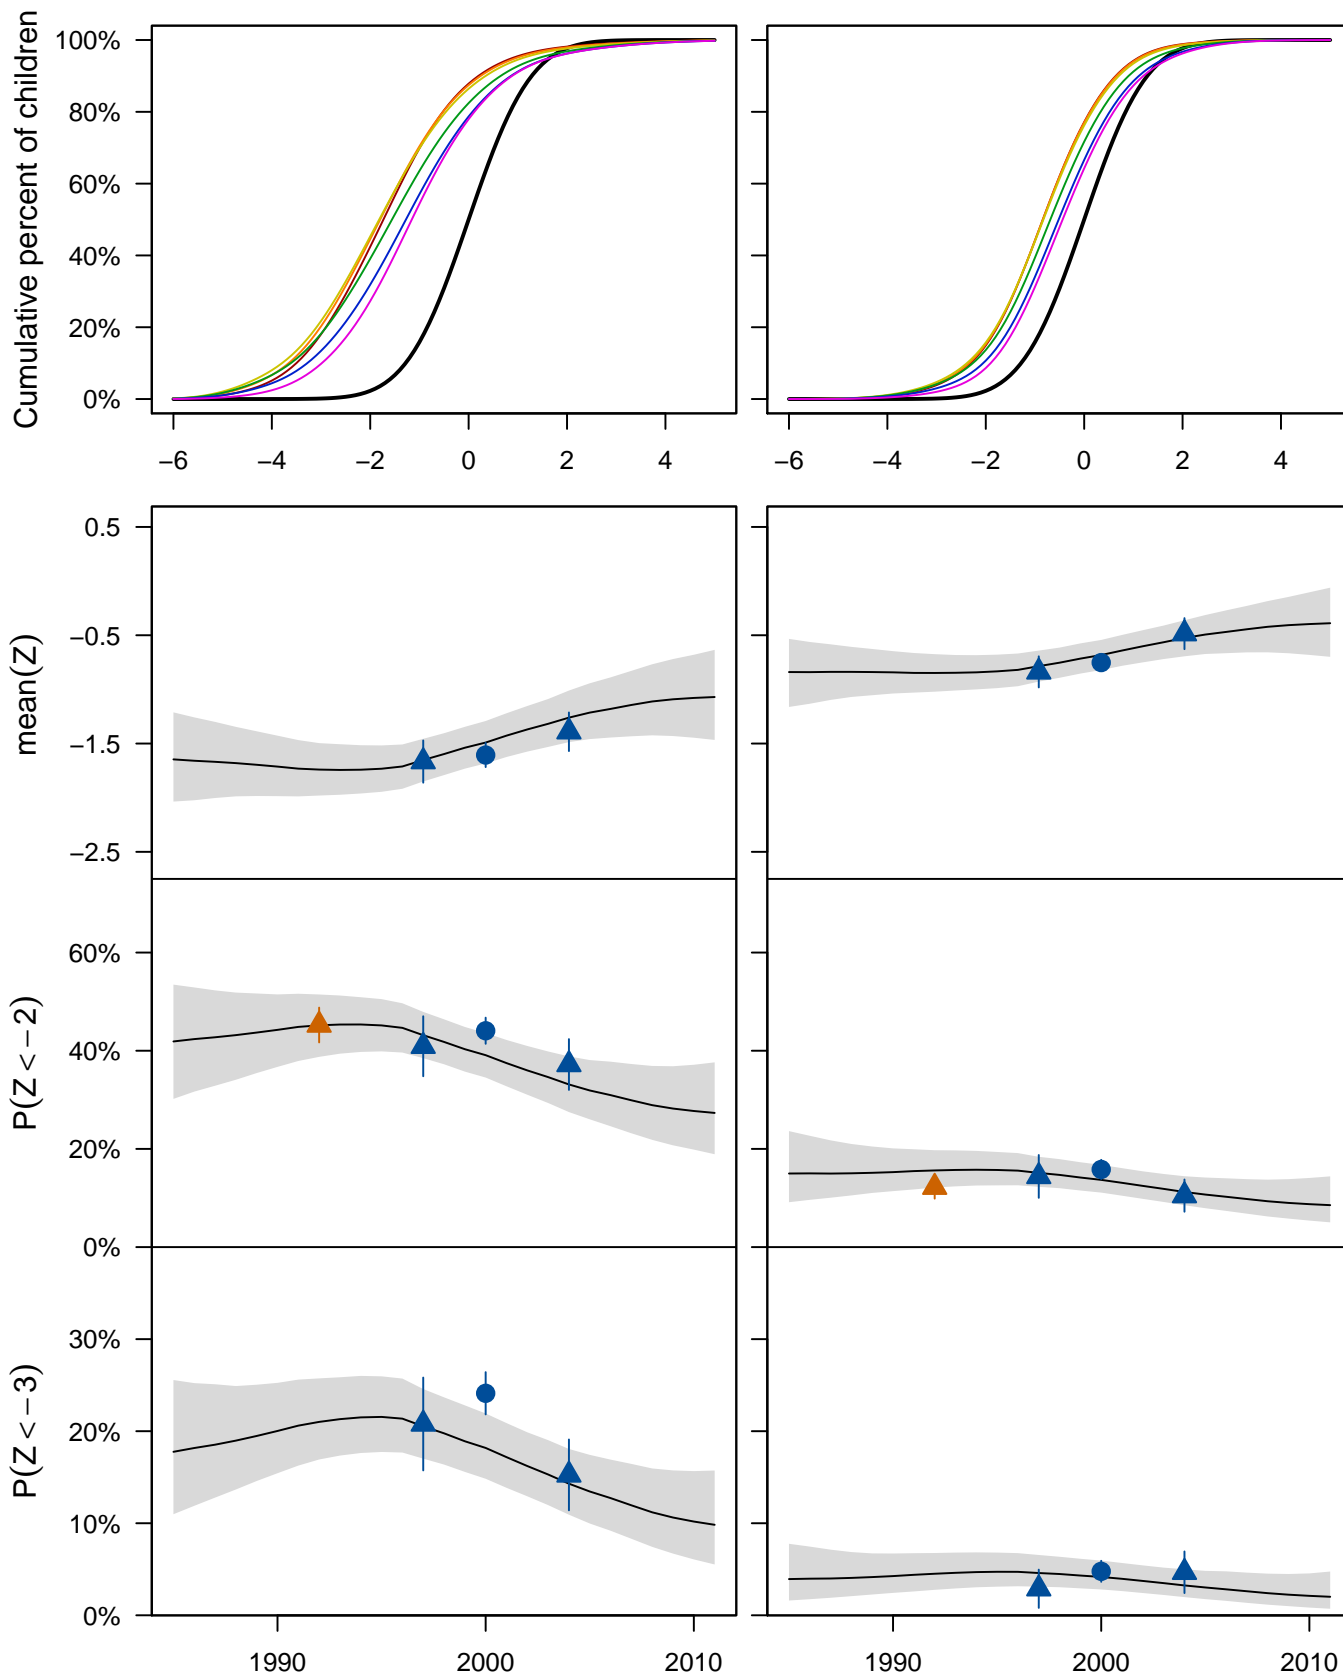

# Eritrea

## Sub-Saharan Africa Region

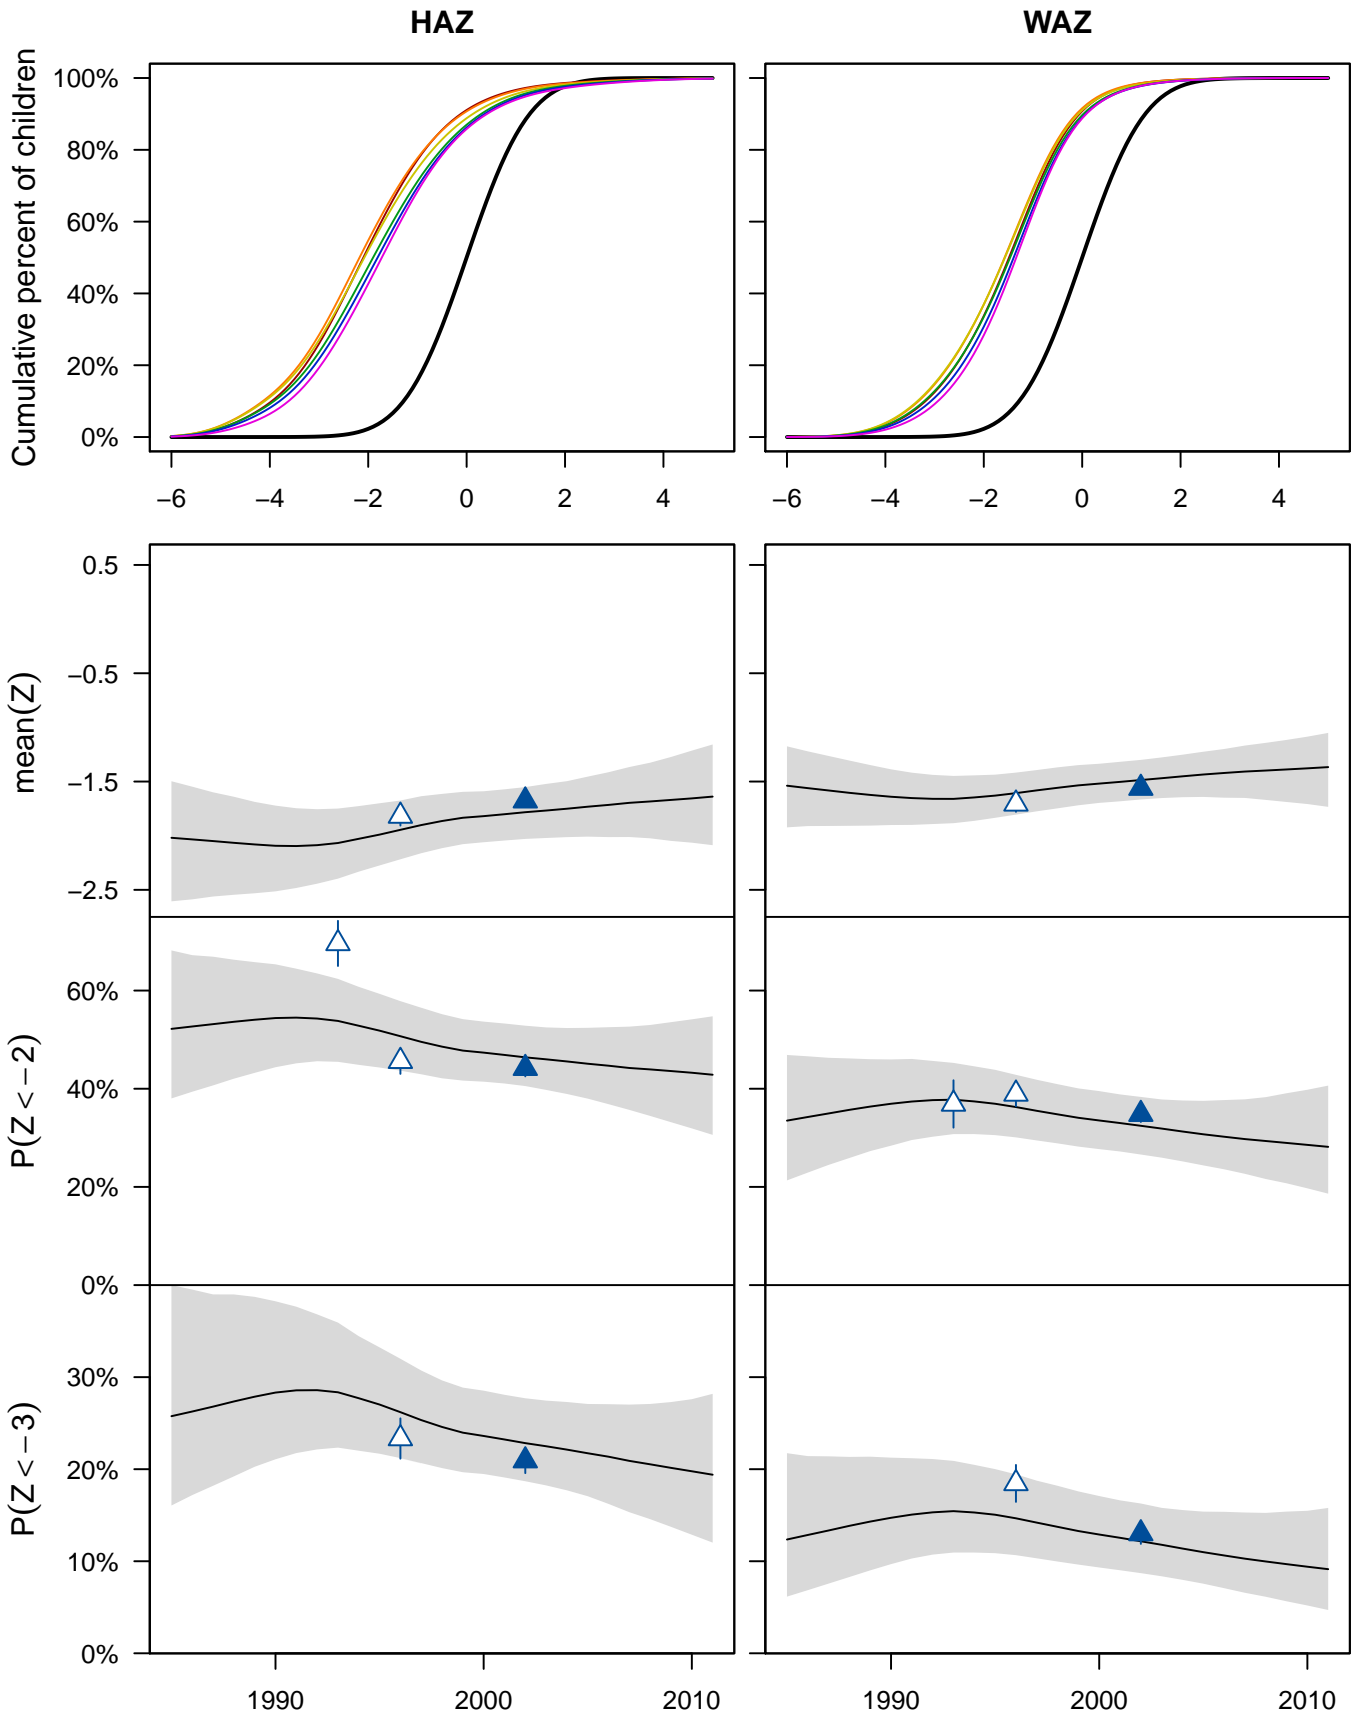



# Ethiopia

## Sub-Saharan Africa Region

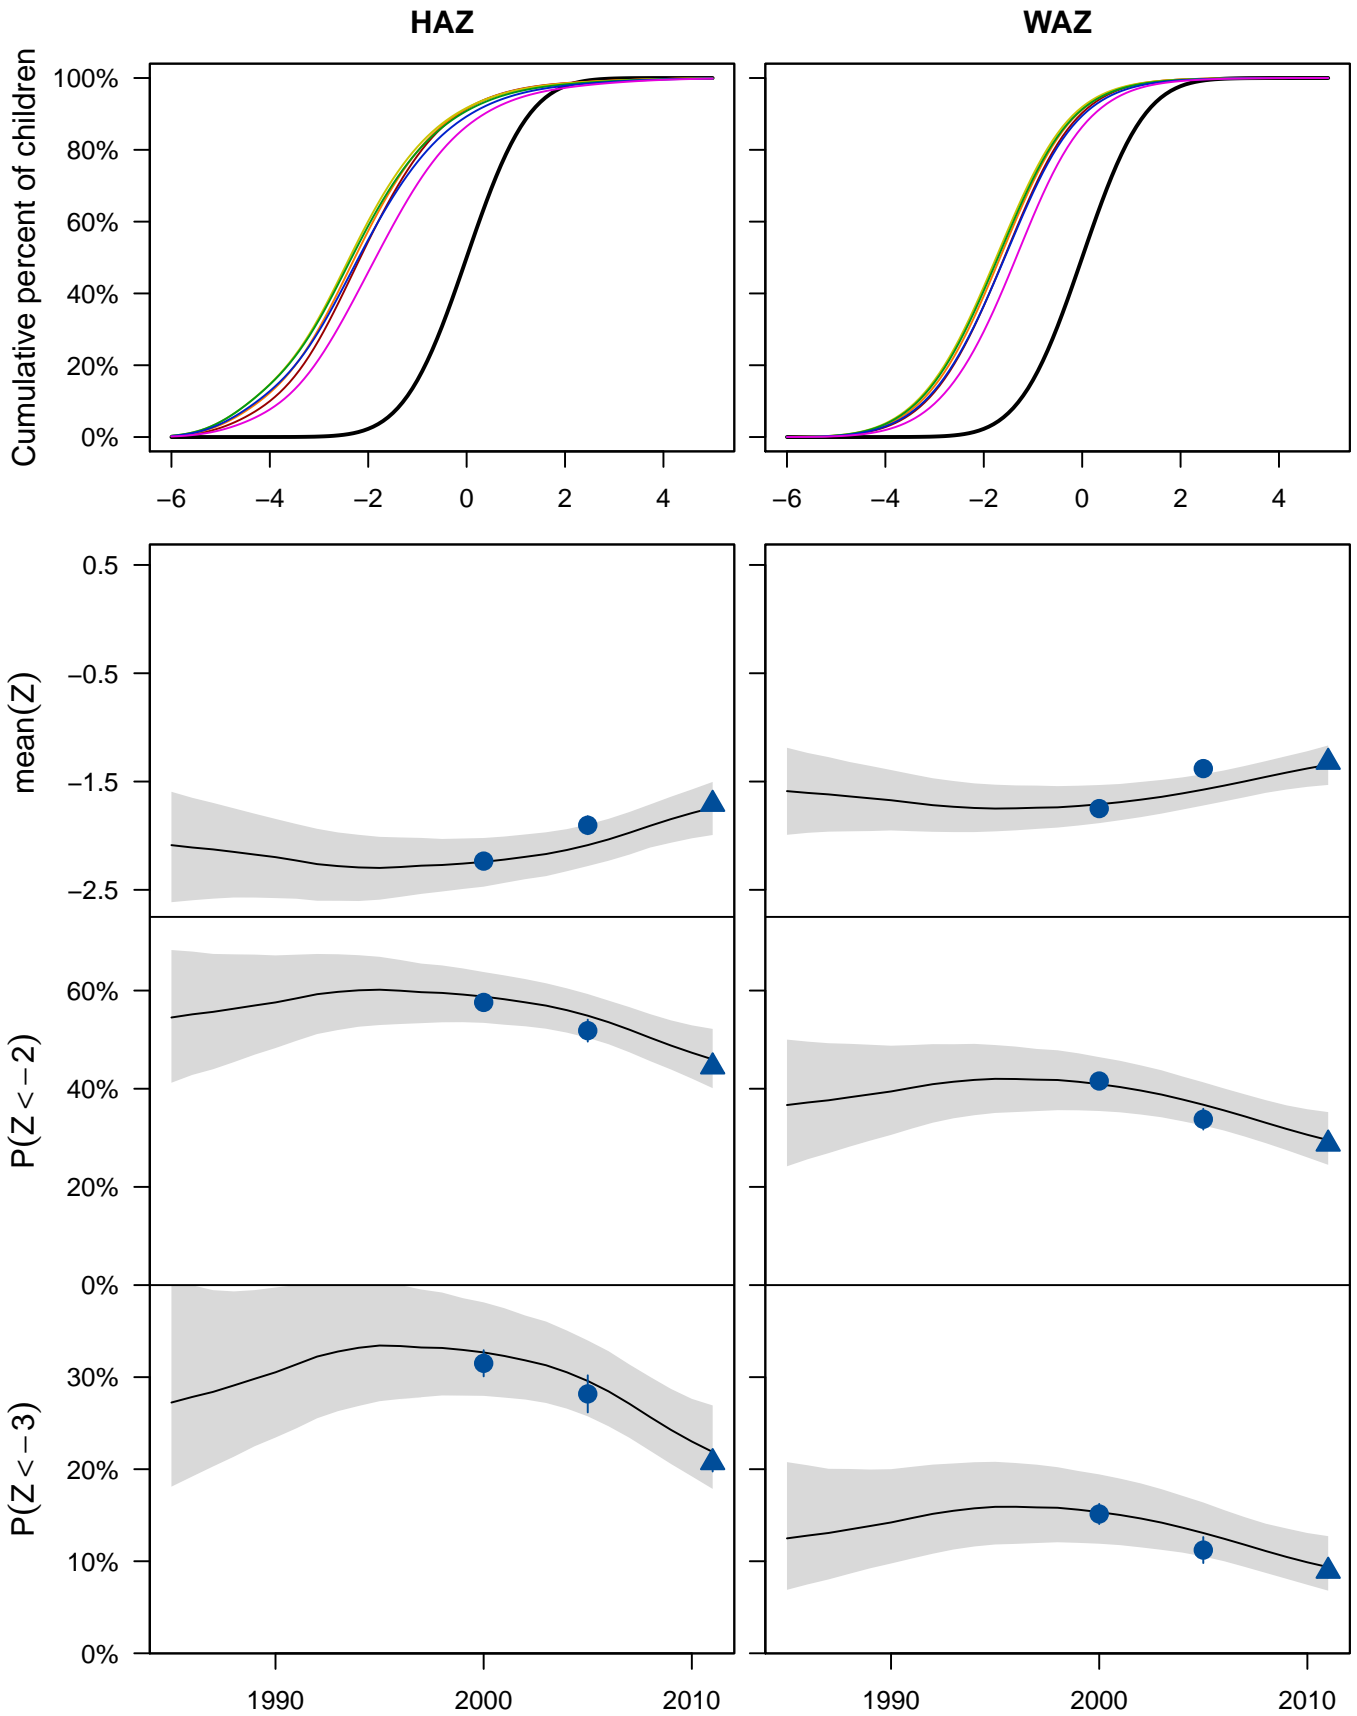

# Fiji

Oceania Region

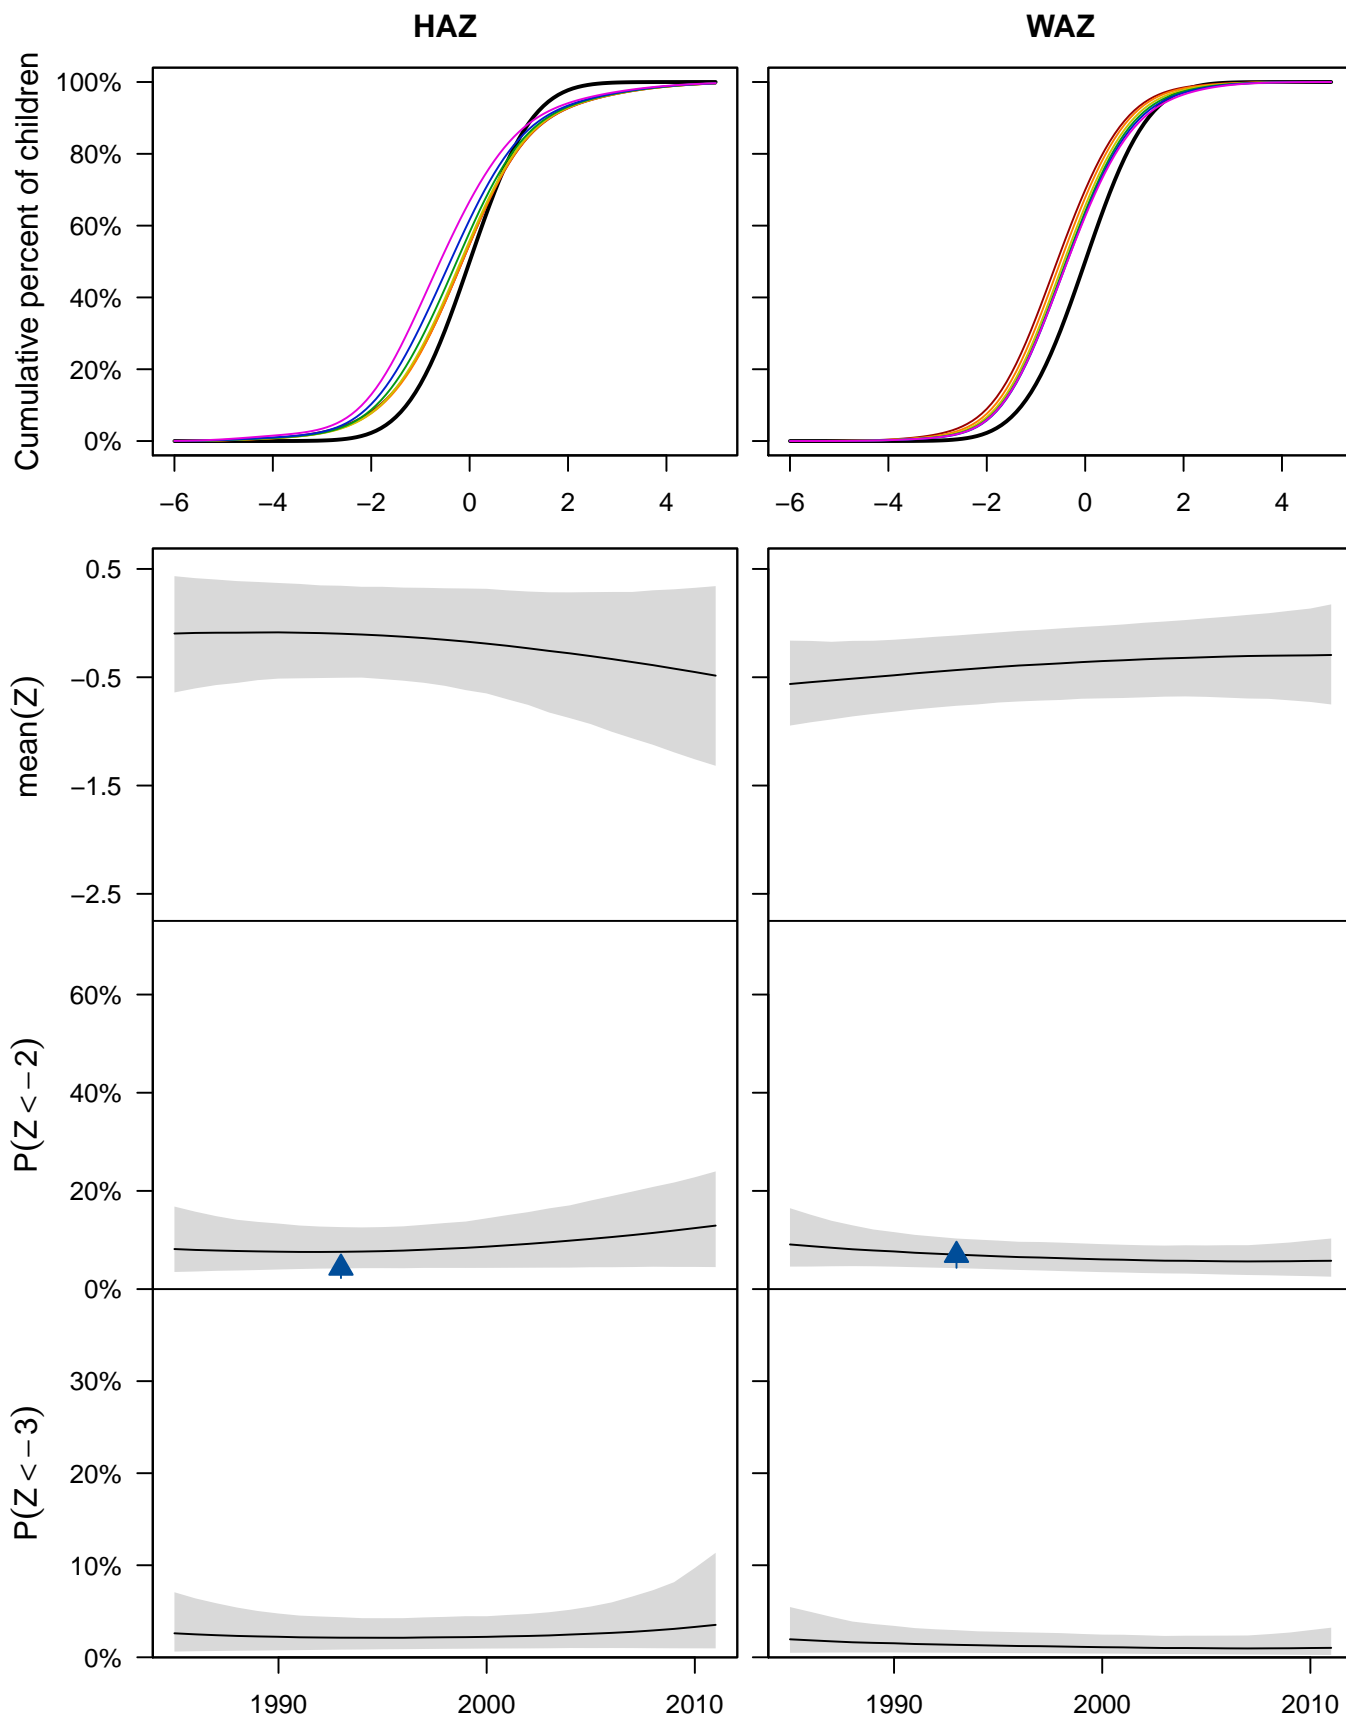

# Gabon

Sub-Saharan Africa Region

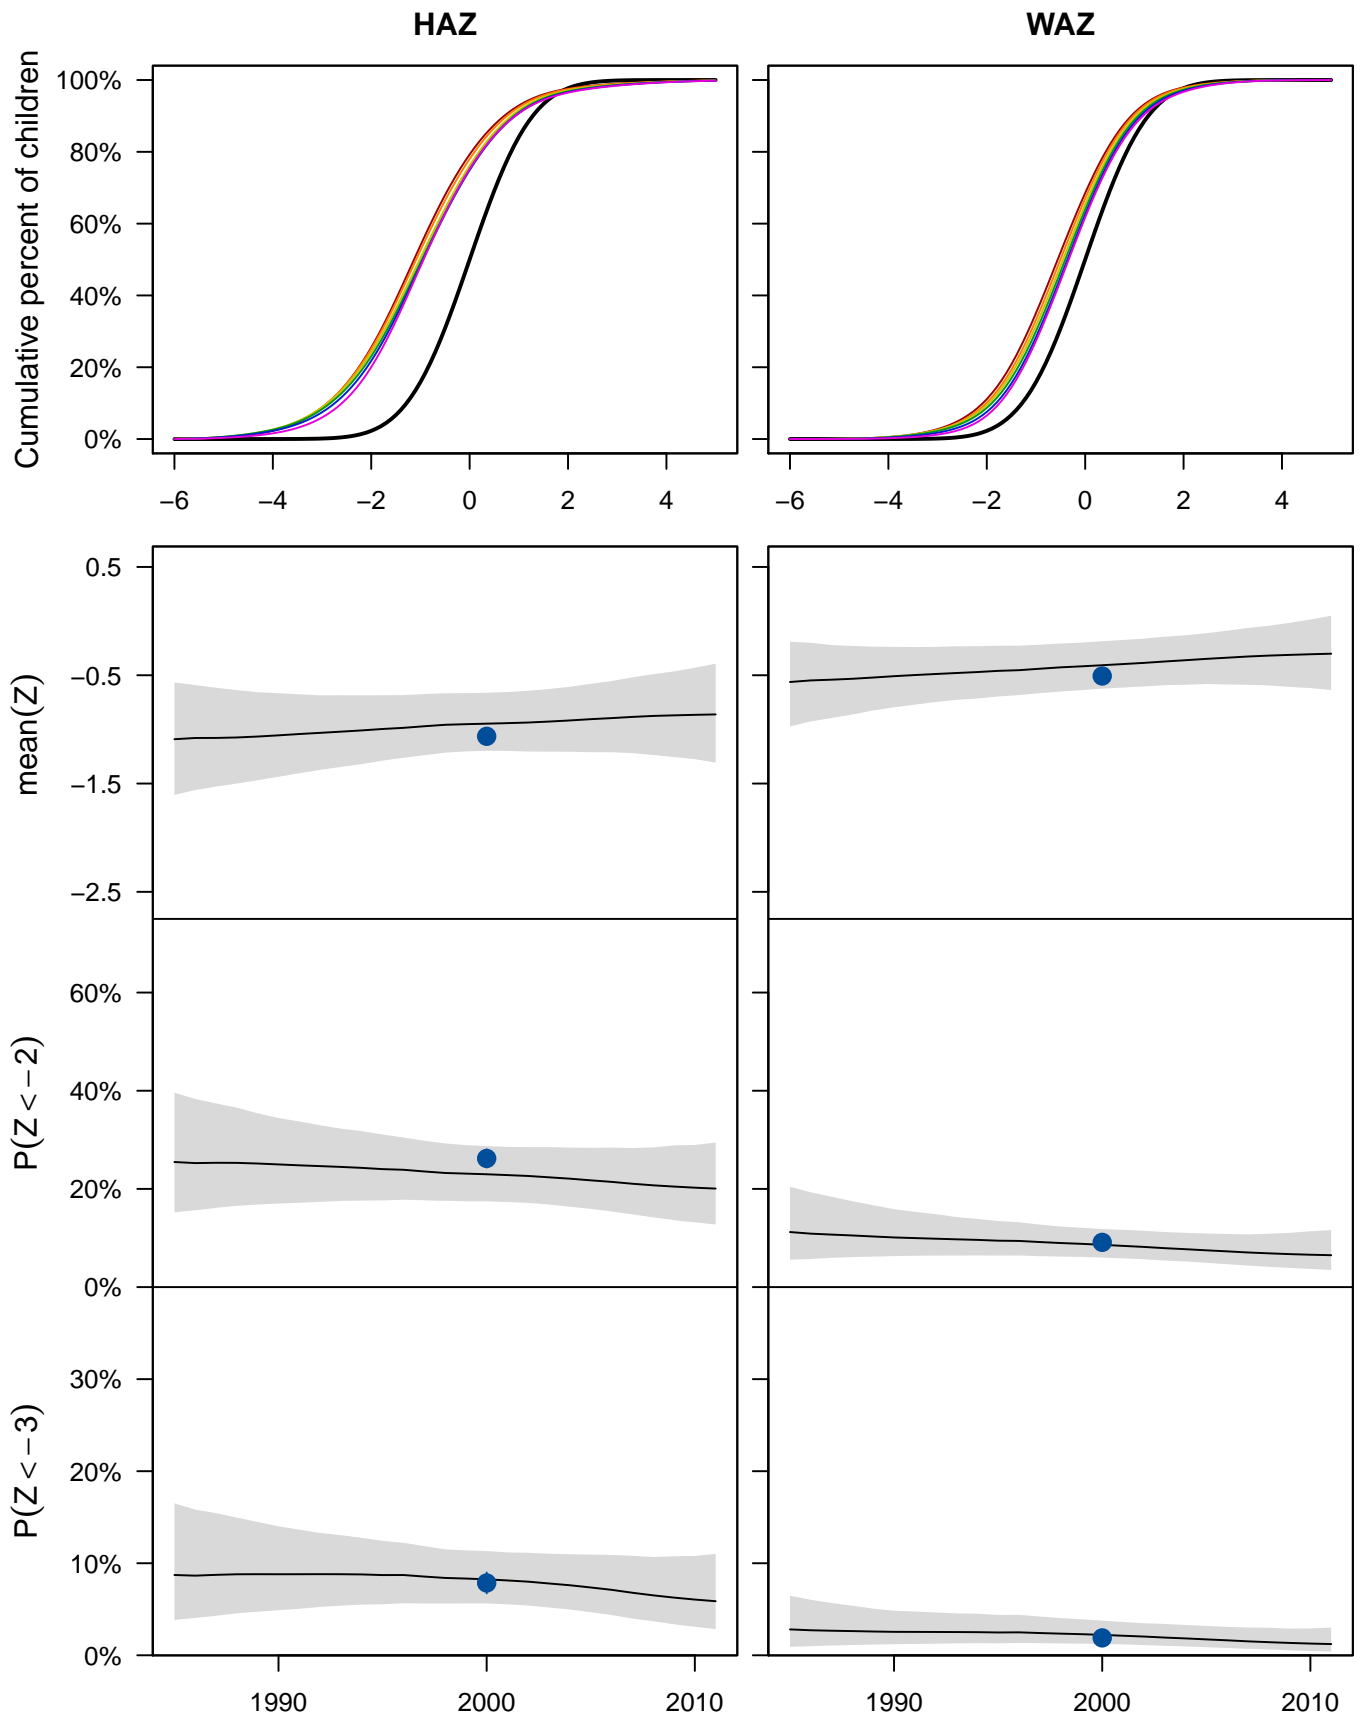

# Gambia

## Sub-Saharan Africa Region

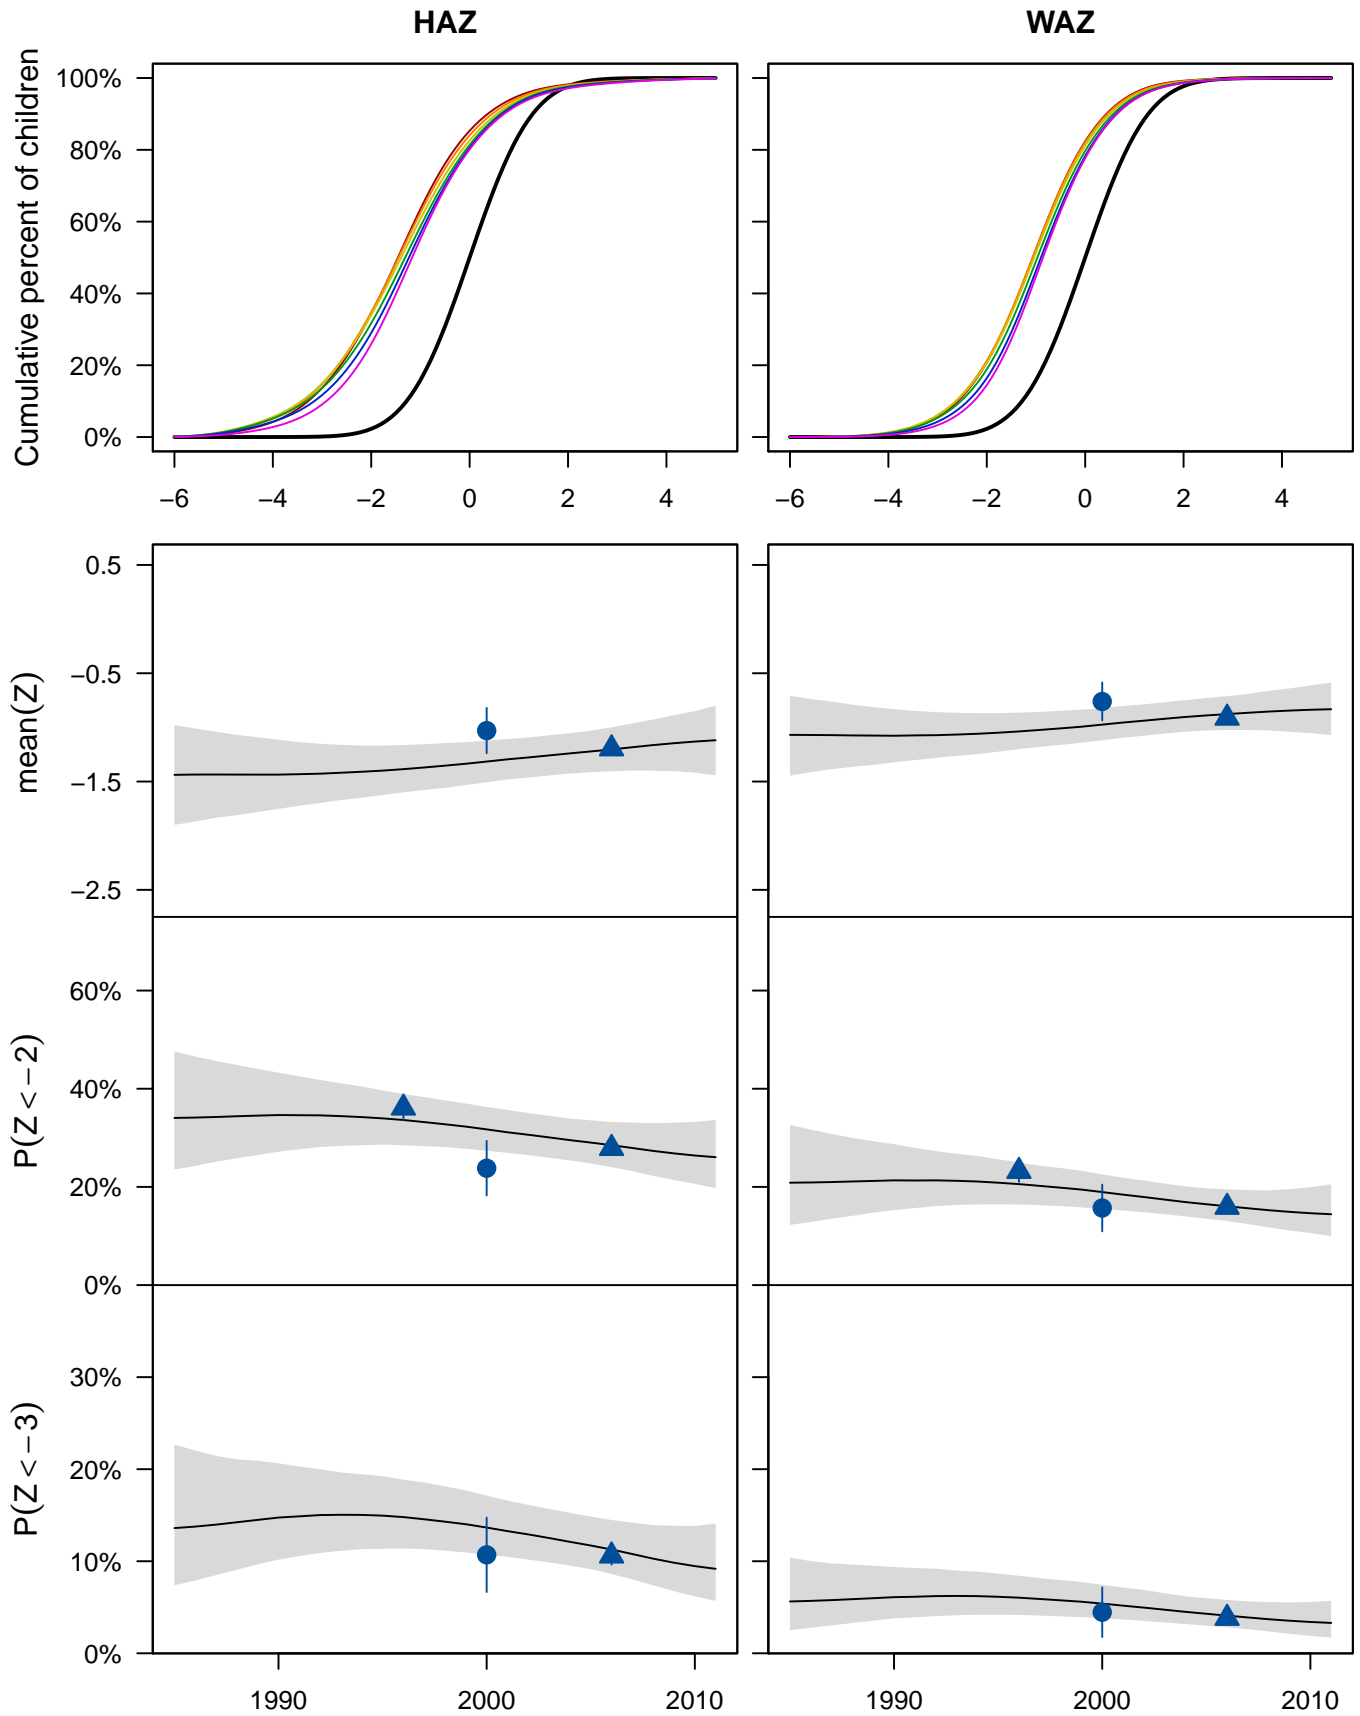

# Georgia

Central Asia, Middle East, and North Africa Region

HAZ

WAZ

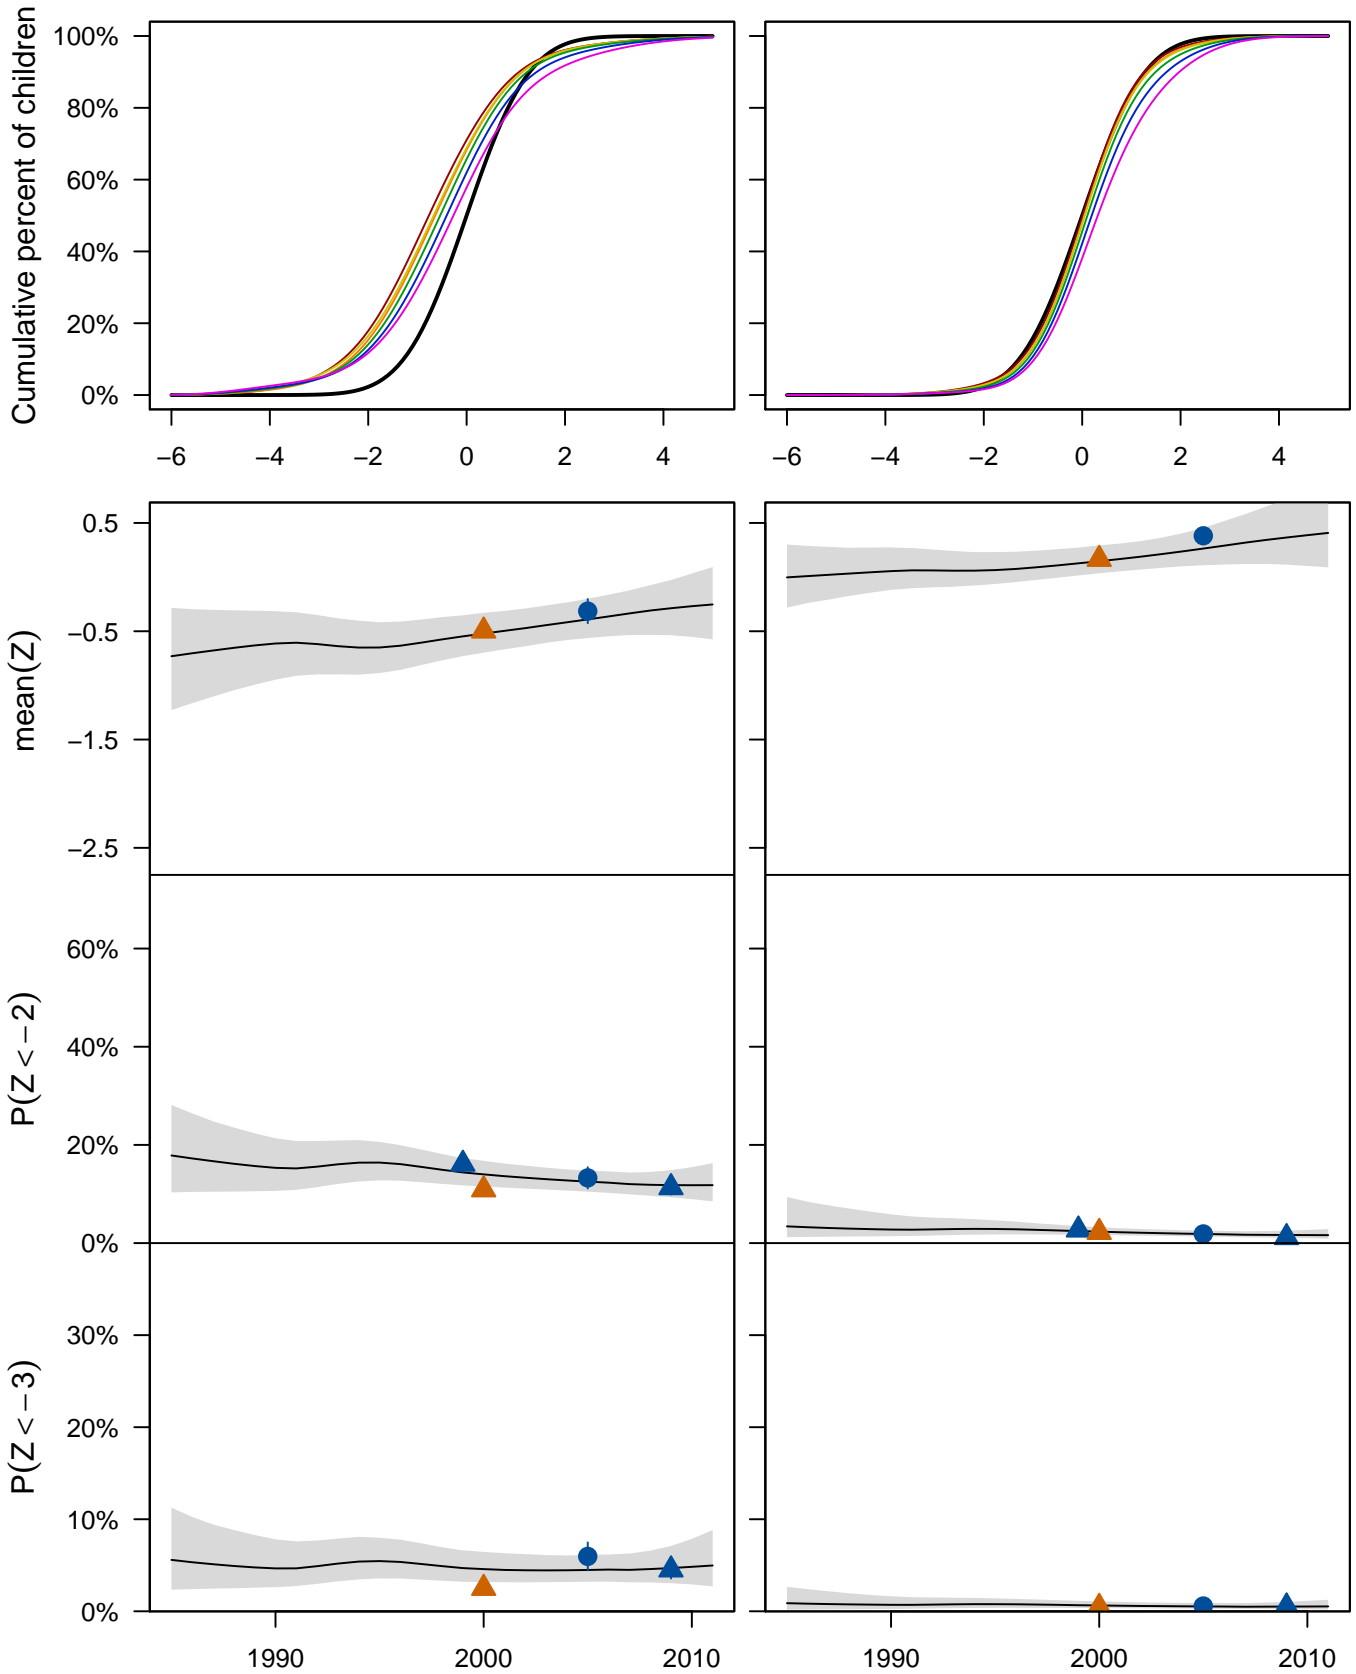

# Ghana

## Sub-Saharan Africa Region

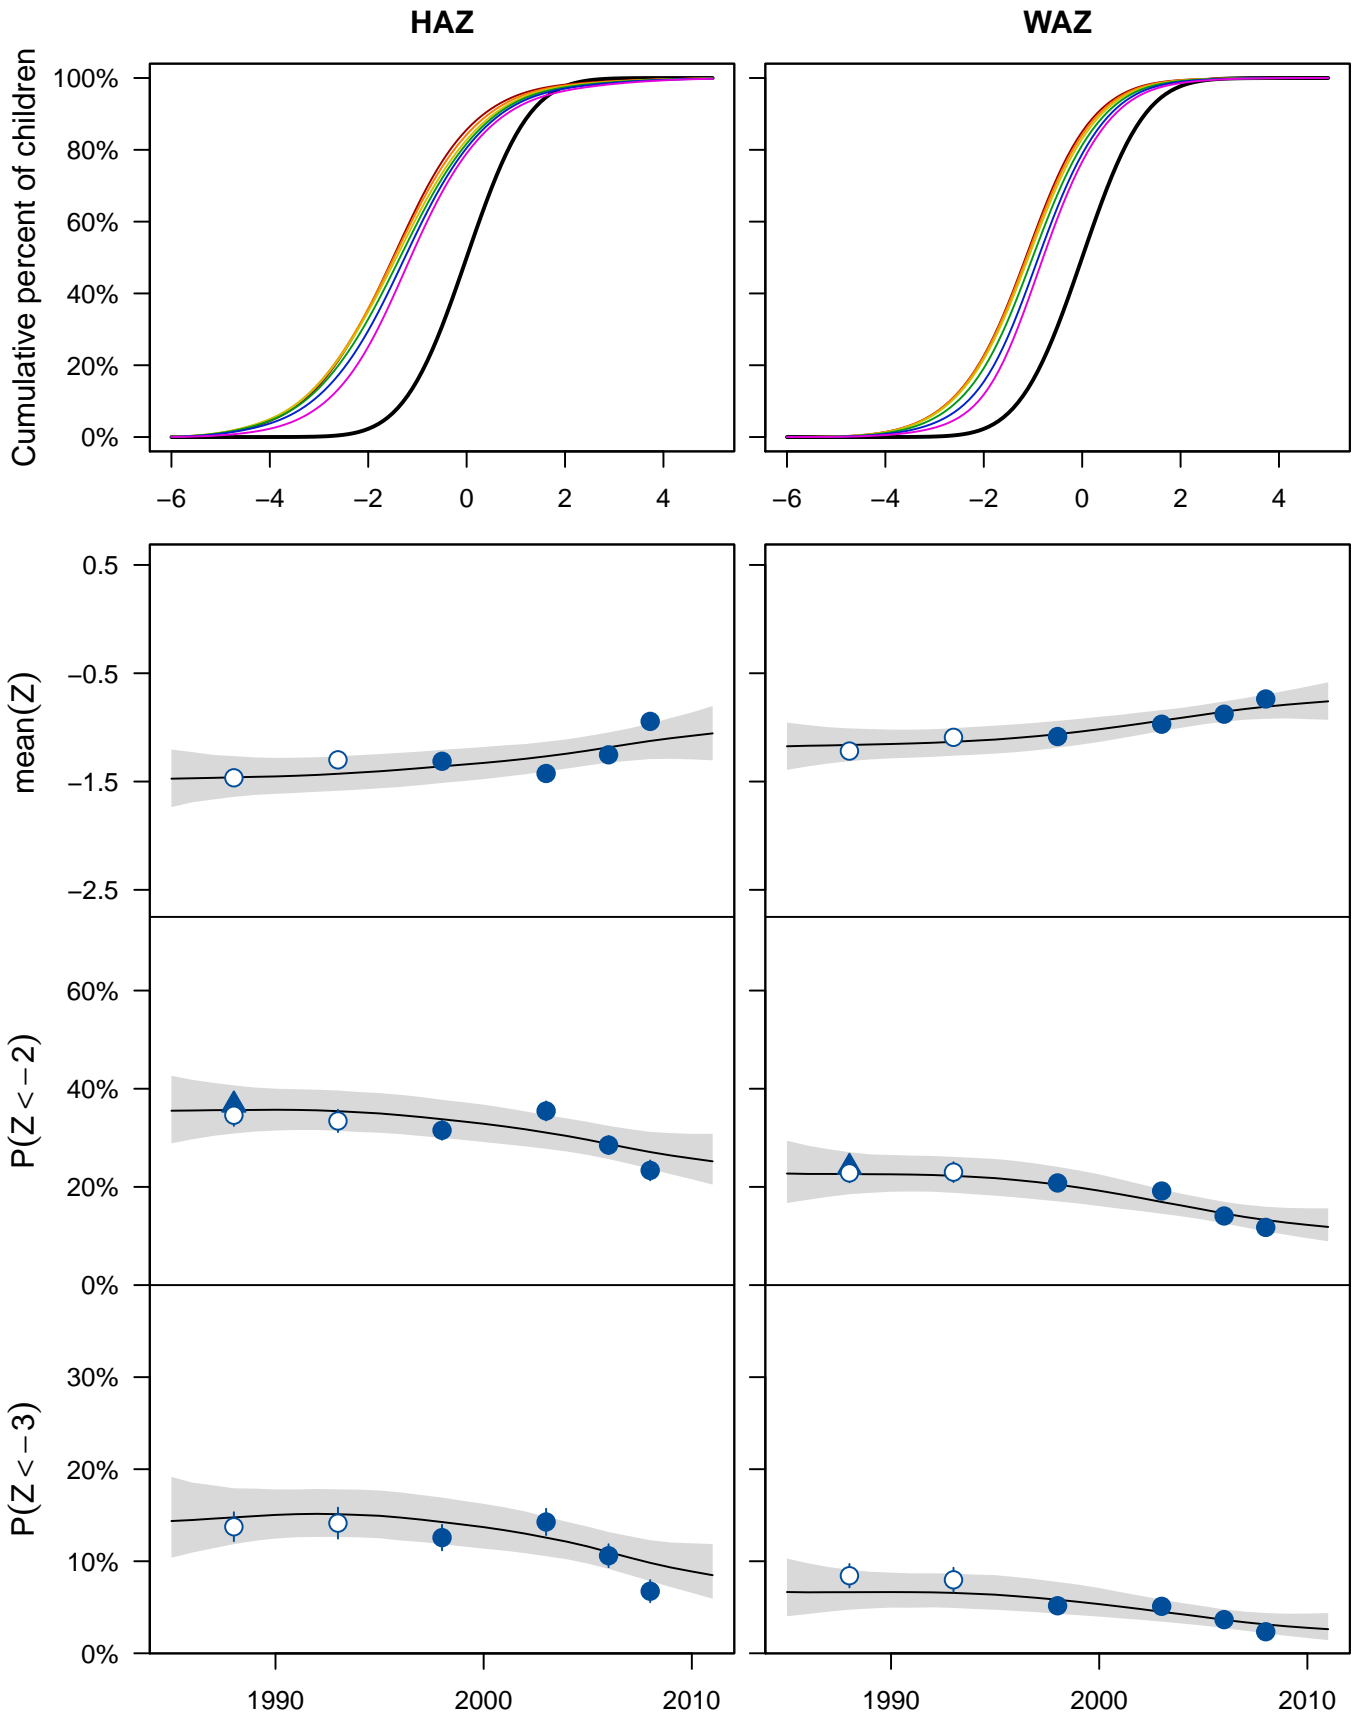

# Grenada

Andean and Central Latin America and Caribbean Region

HAZ

WAZ

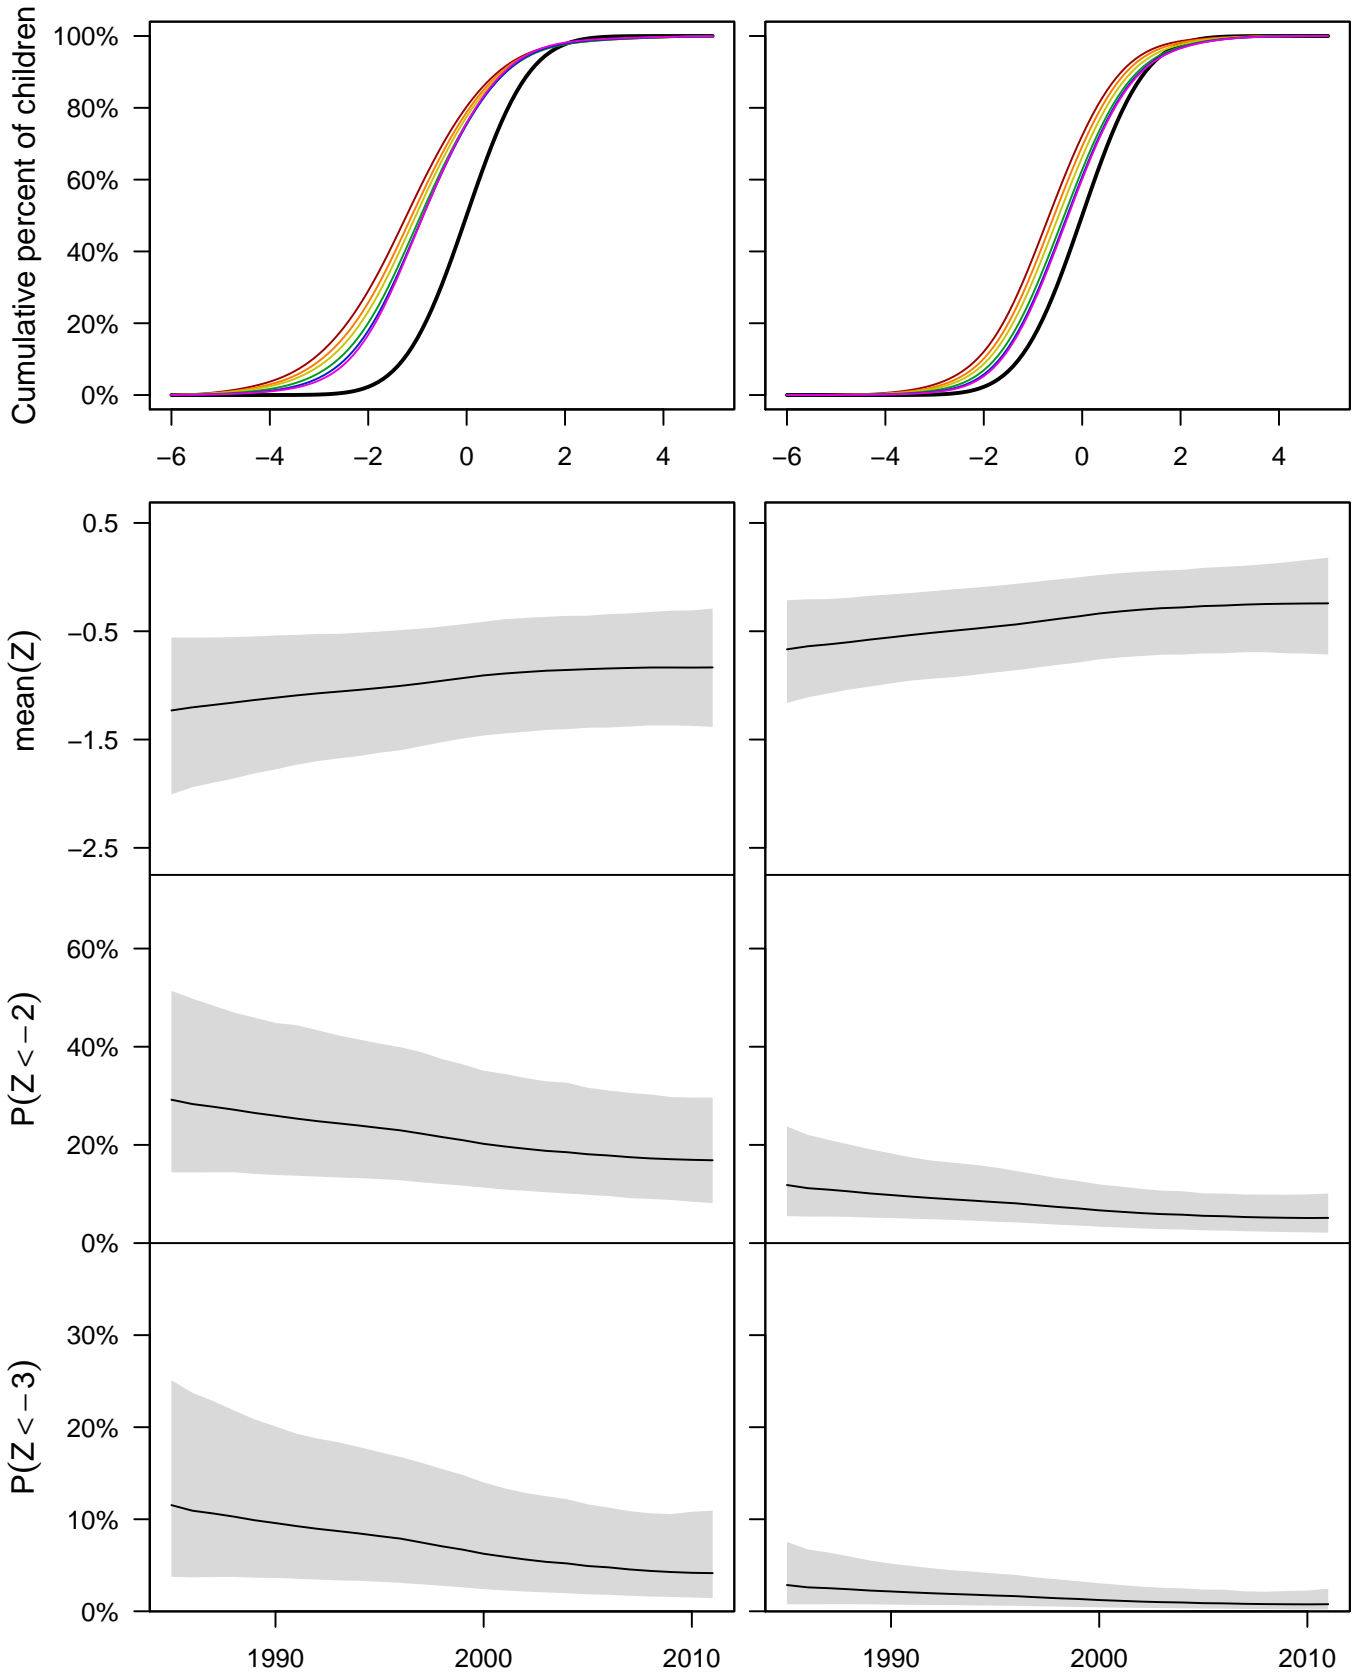

# Guatemala

Andean and Central Latin America and Caribbean Region

HAZ

WAZ

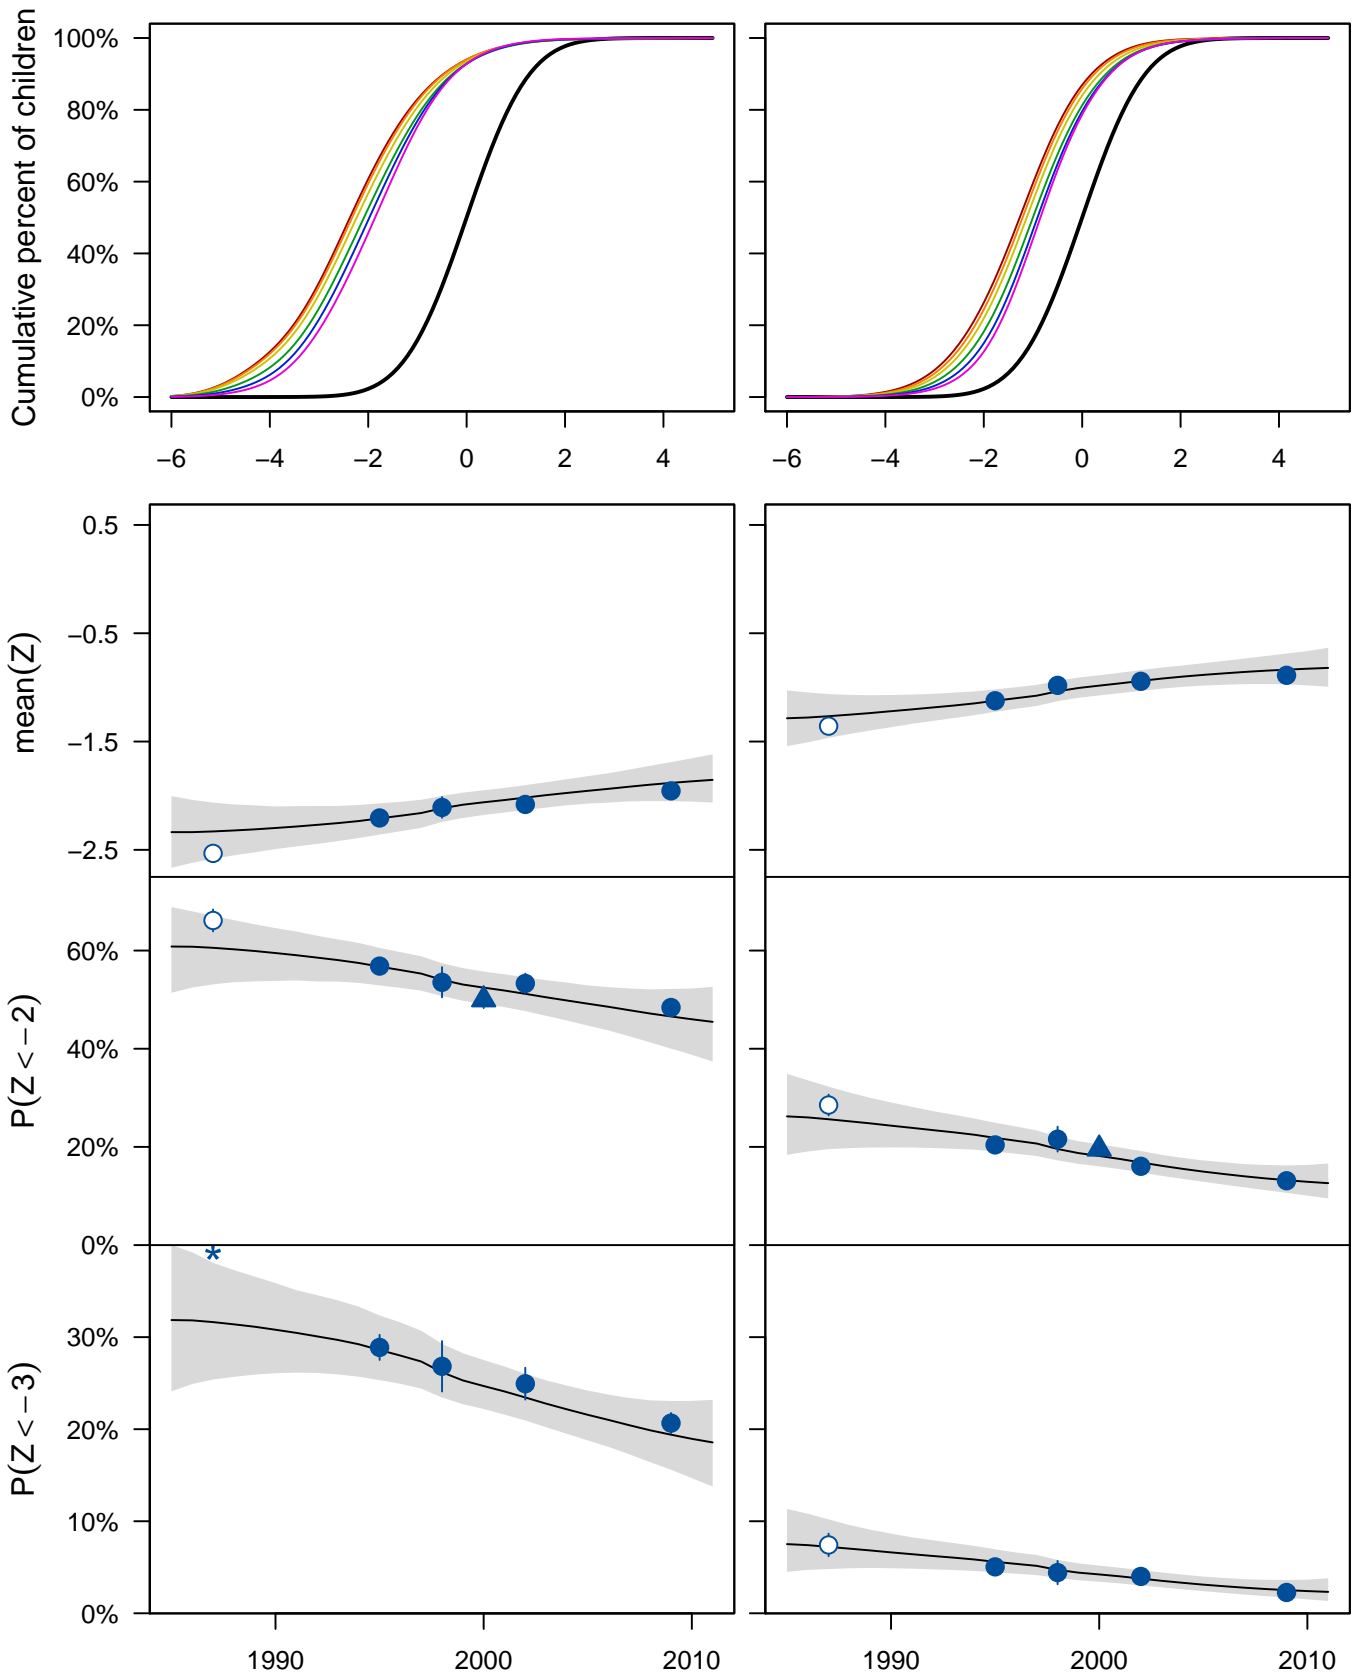



# Guinea

Sub-Saharan Africa Region

HAZ

WAZ

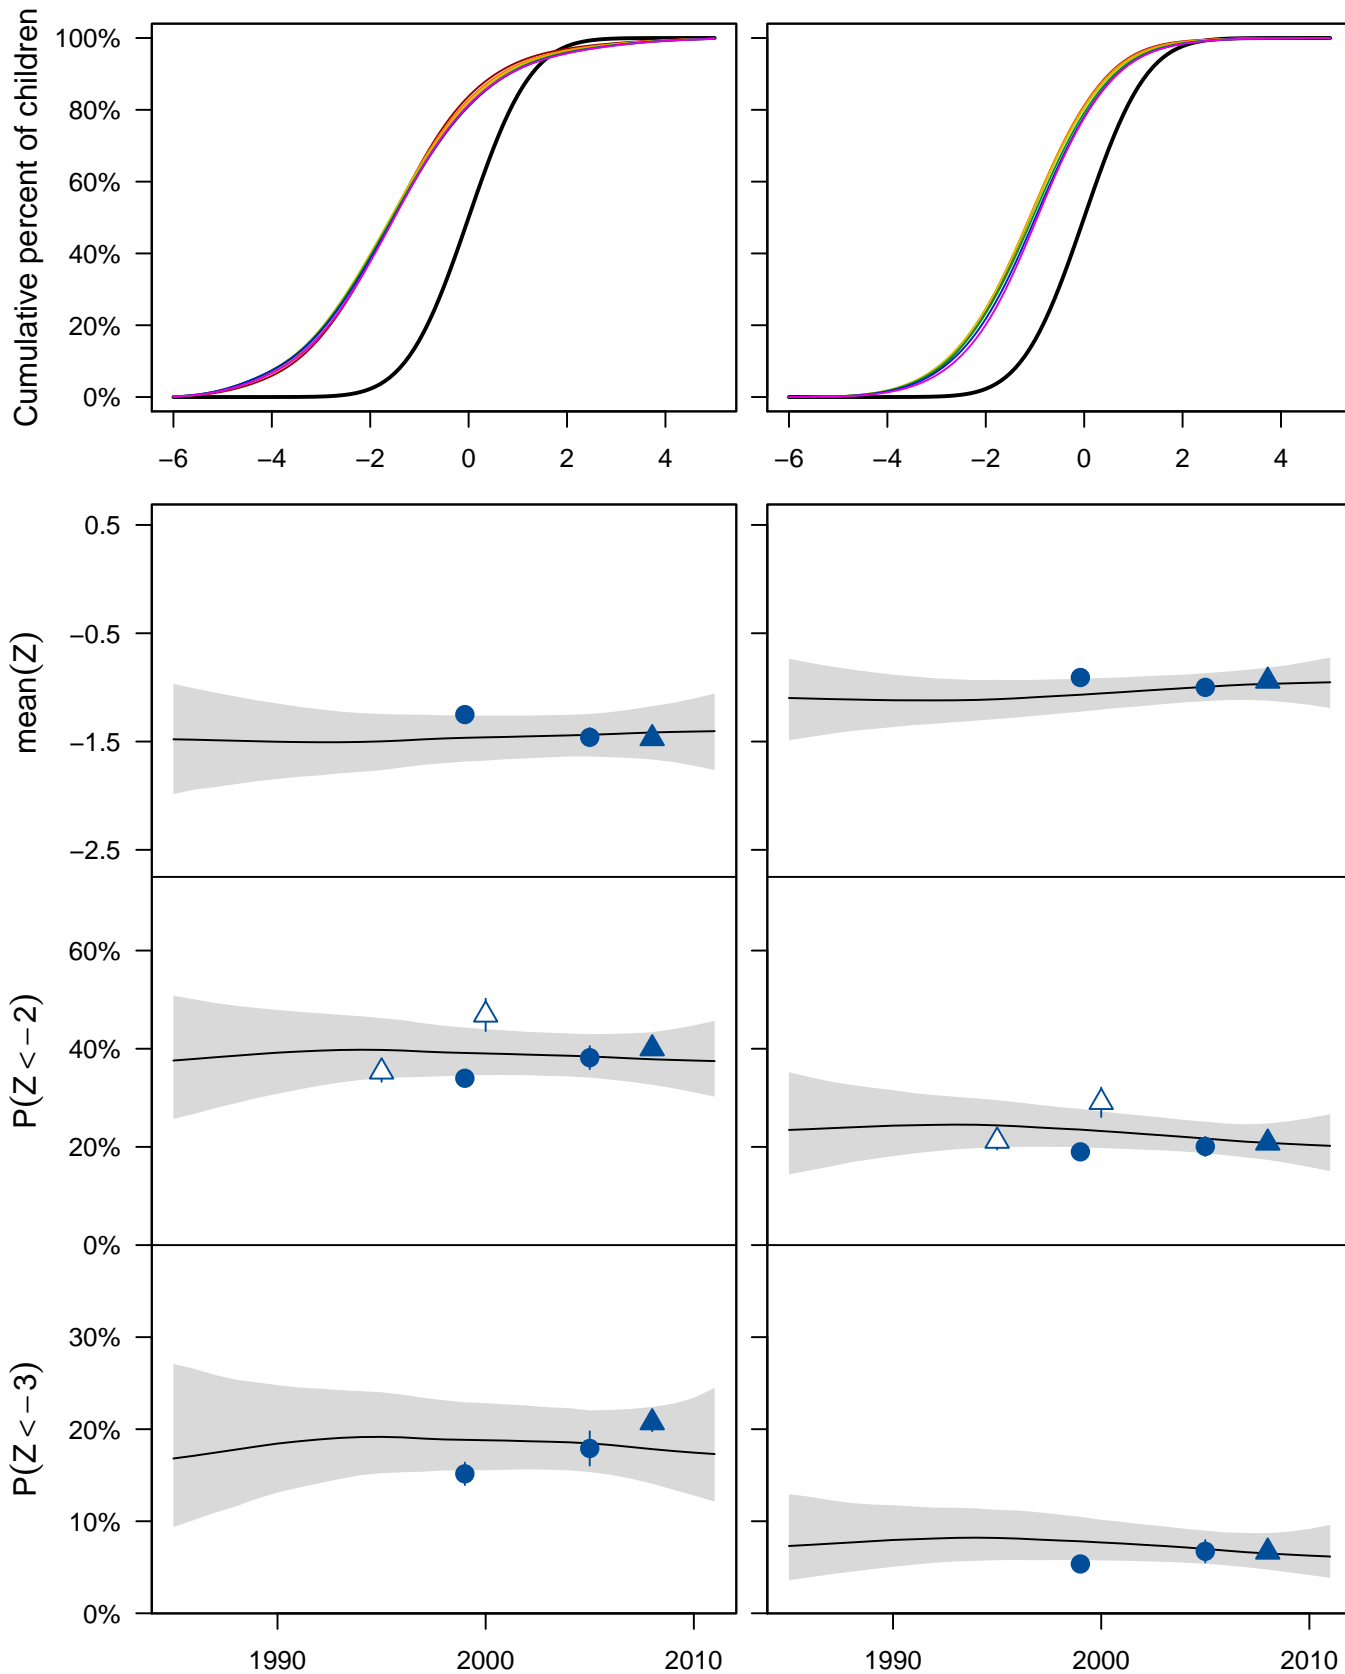

# Guinea-Bissau

## Sub-Saharan Africa Region

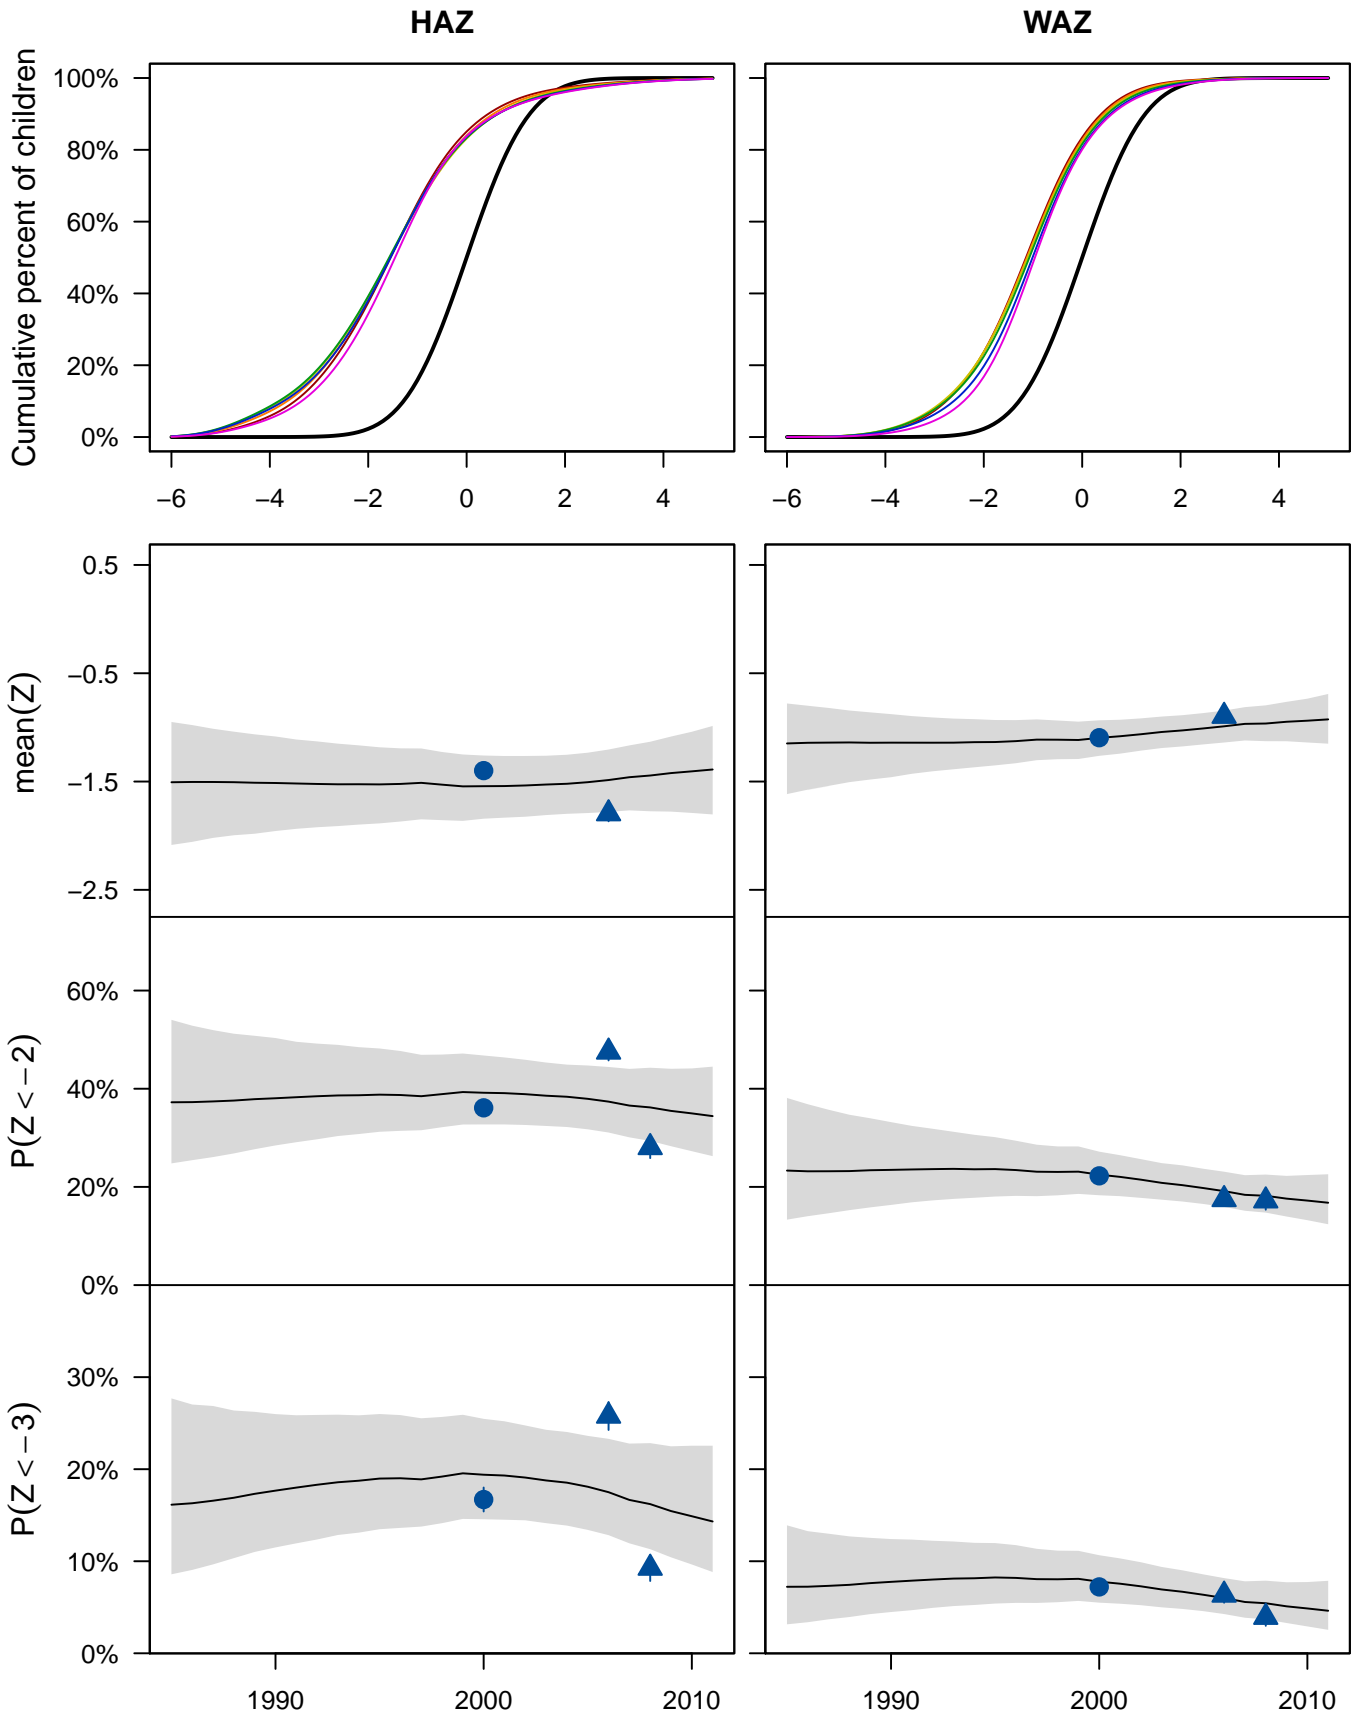

# Guyana

Andean and Central Latin America and Caribbean Region

HAZ

WAZ

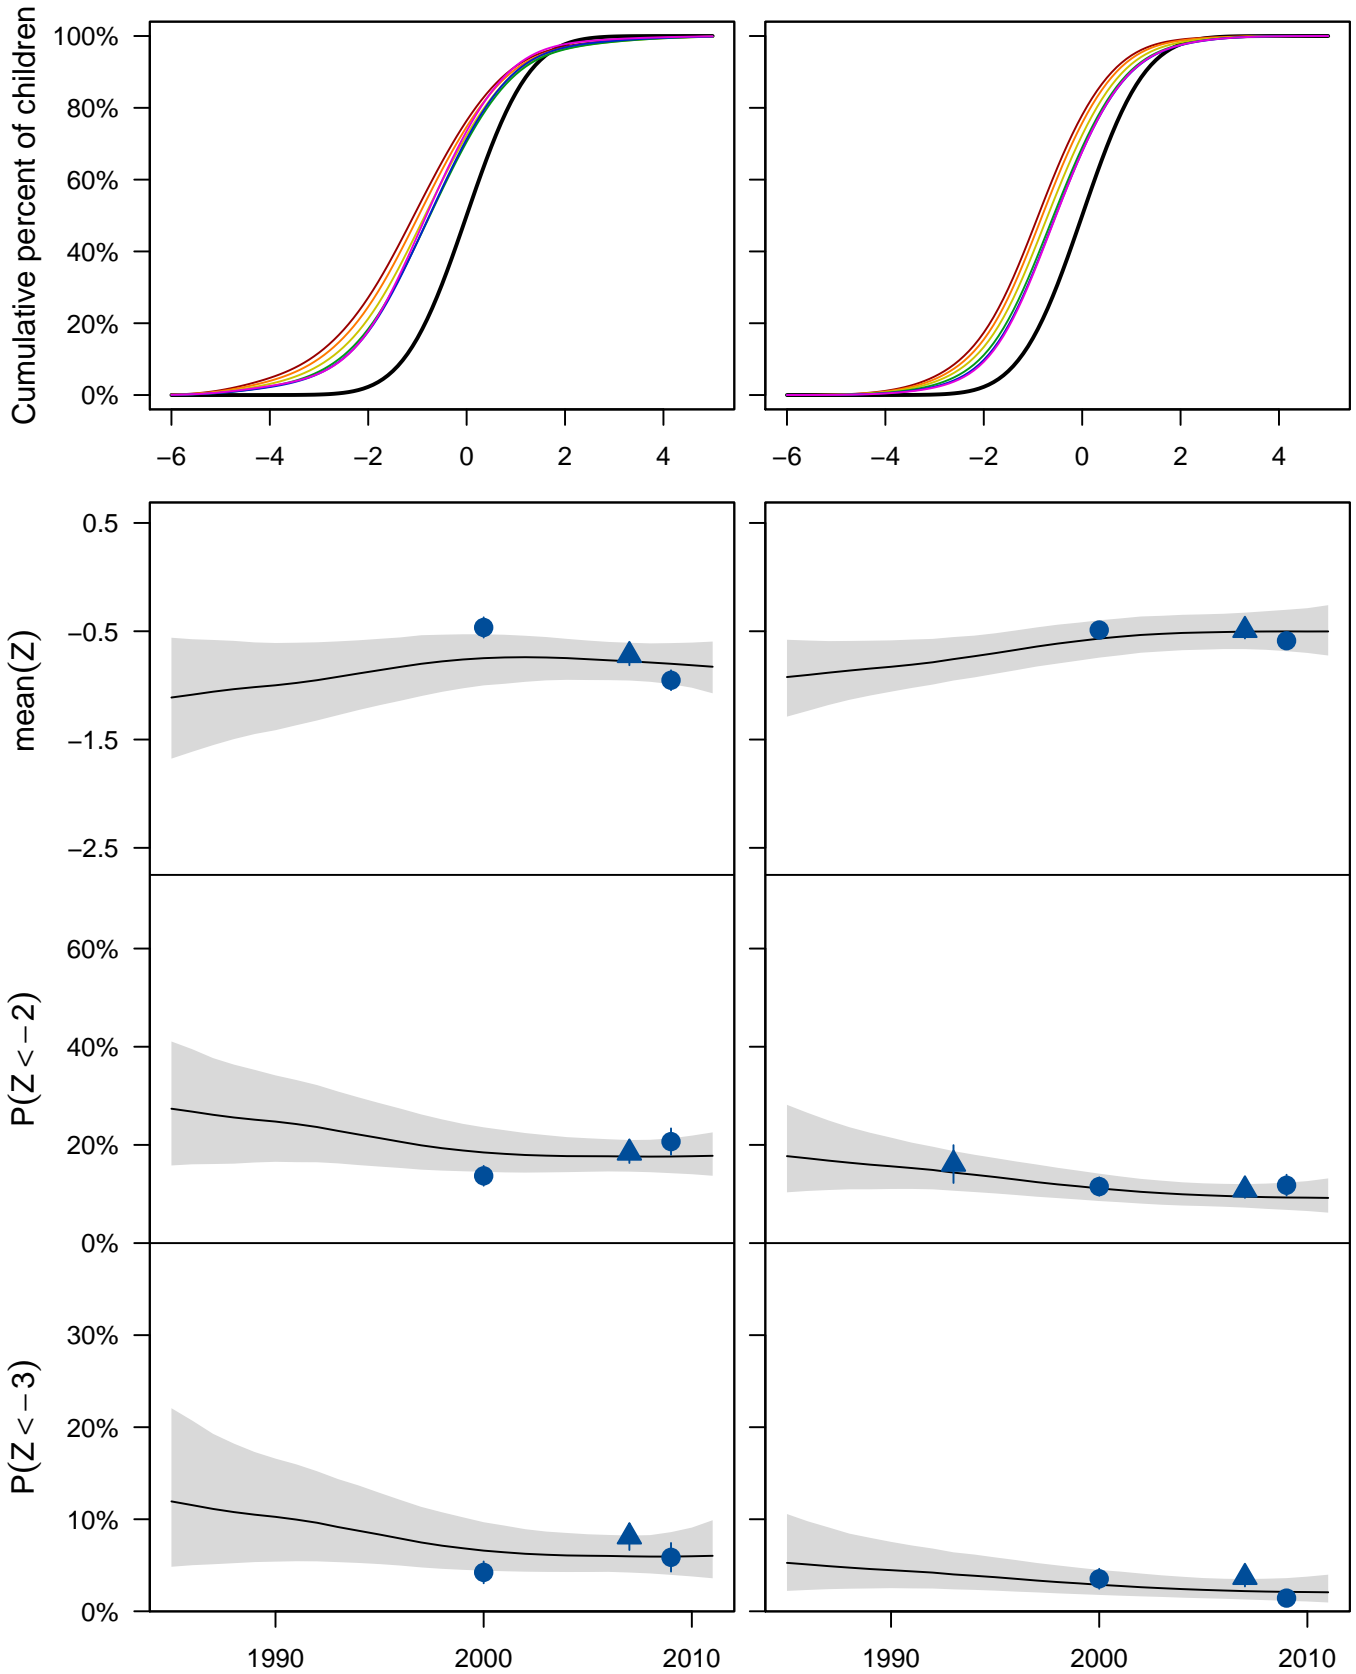

# Haiti

Andean and Central Latin America and Caribbean Region

HAZ

WAZ

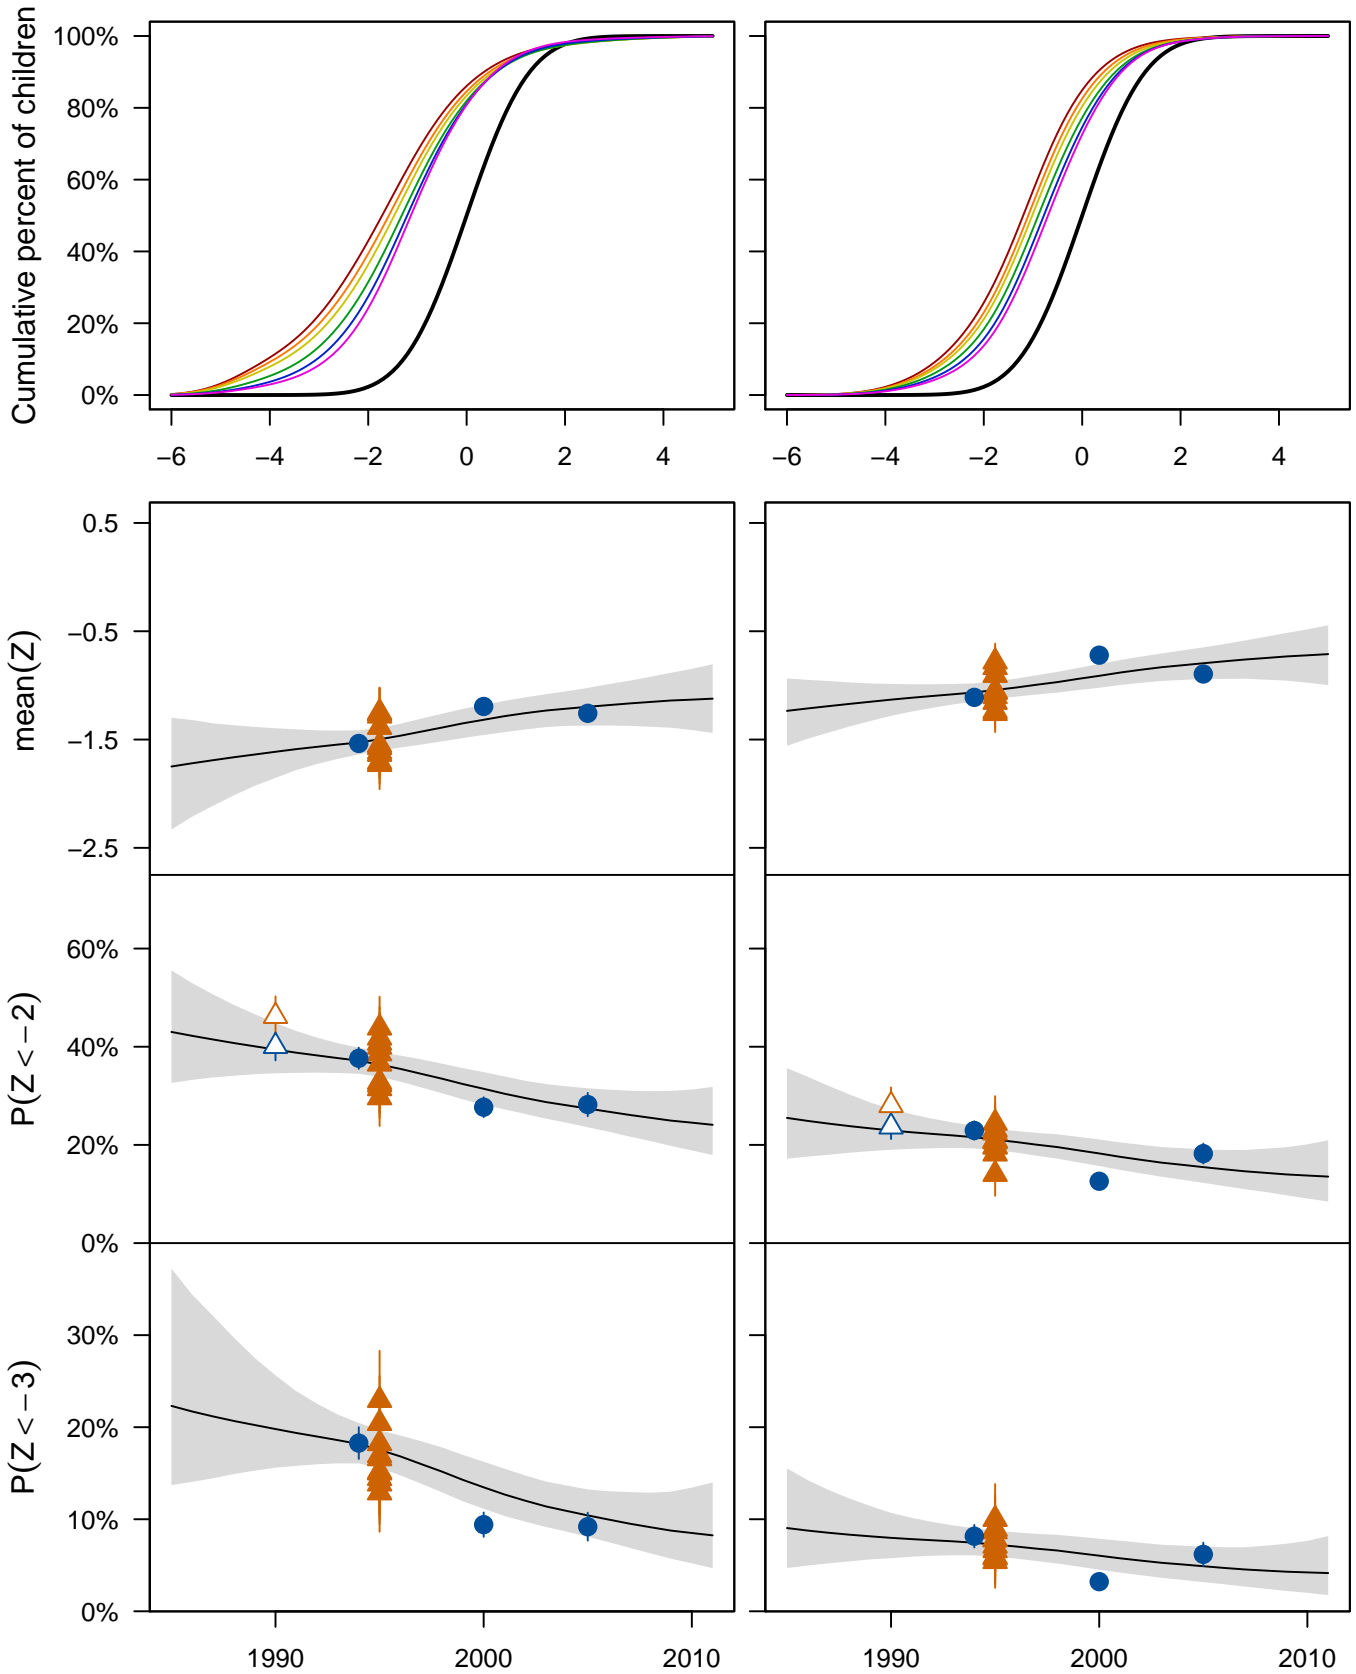

# Honduras

Andean and Central Latin America and Caribbean Region

HAZ

WAZ

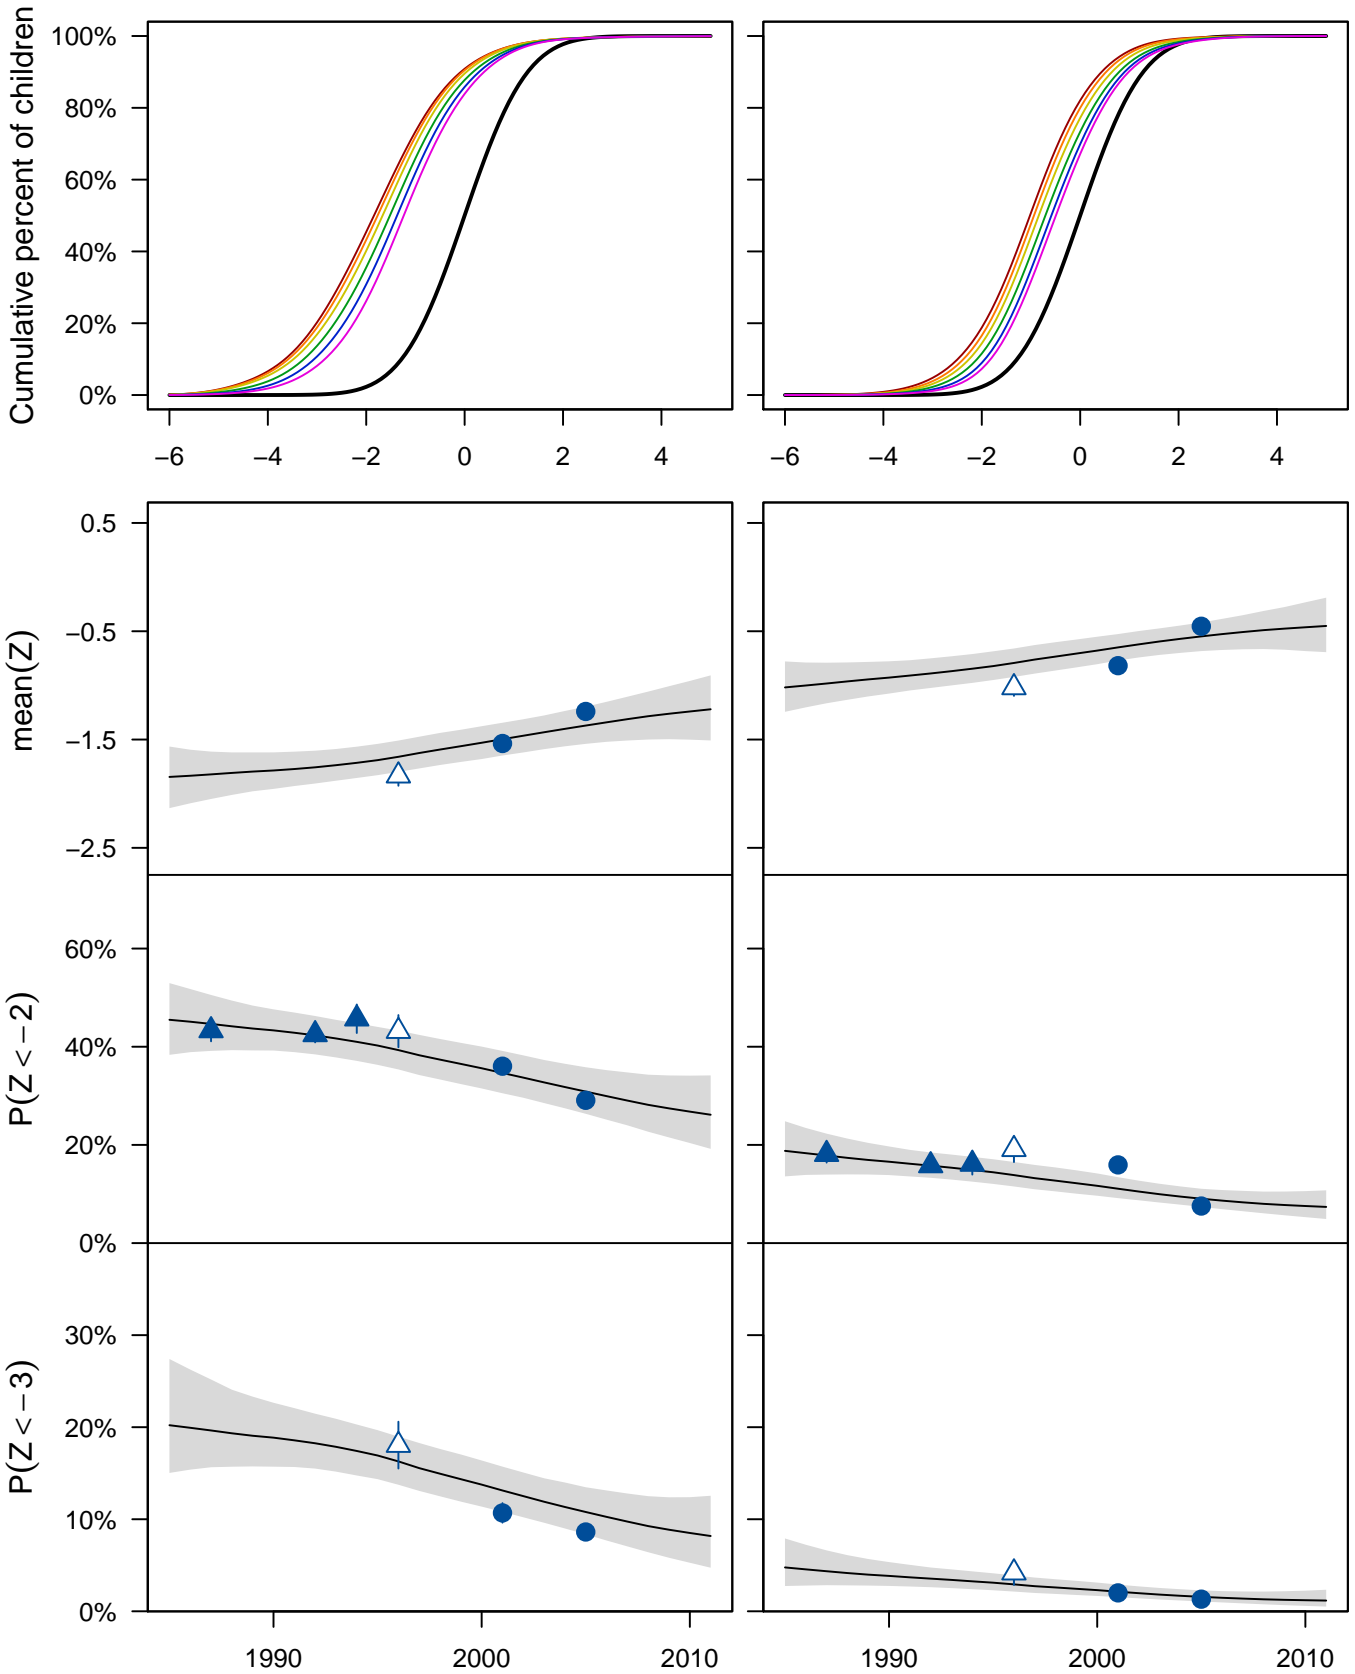

# India

## South Asia Region

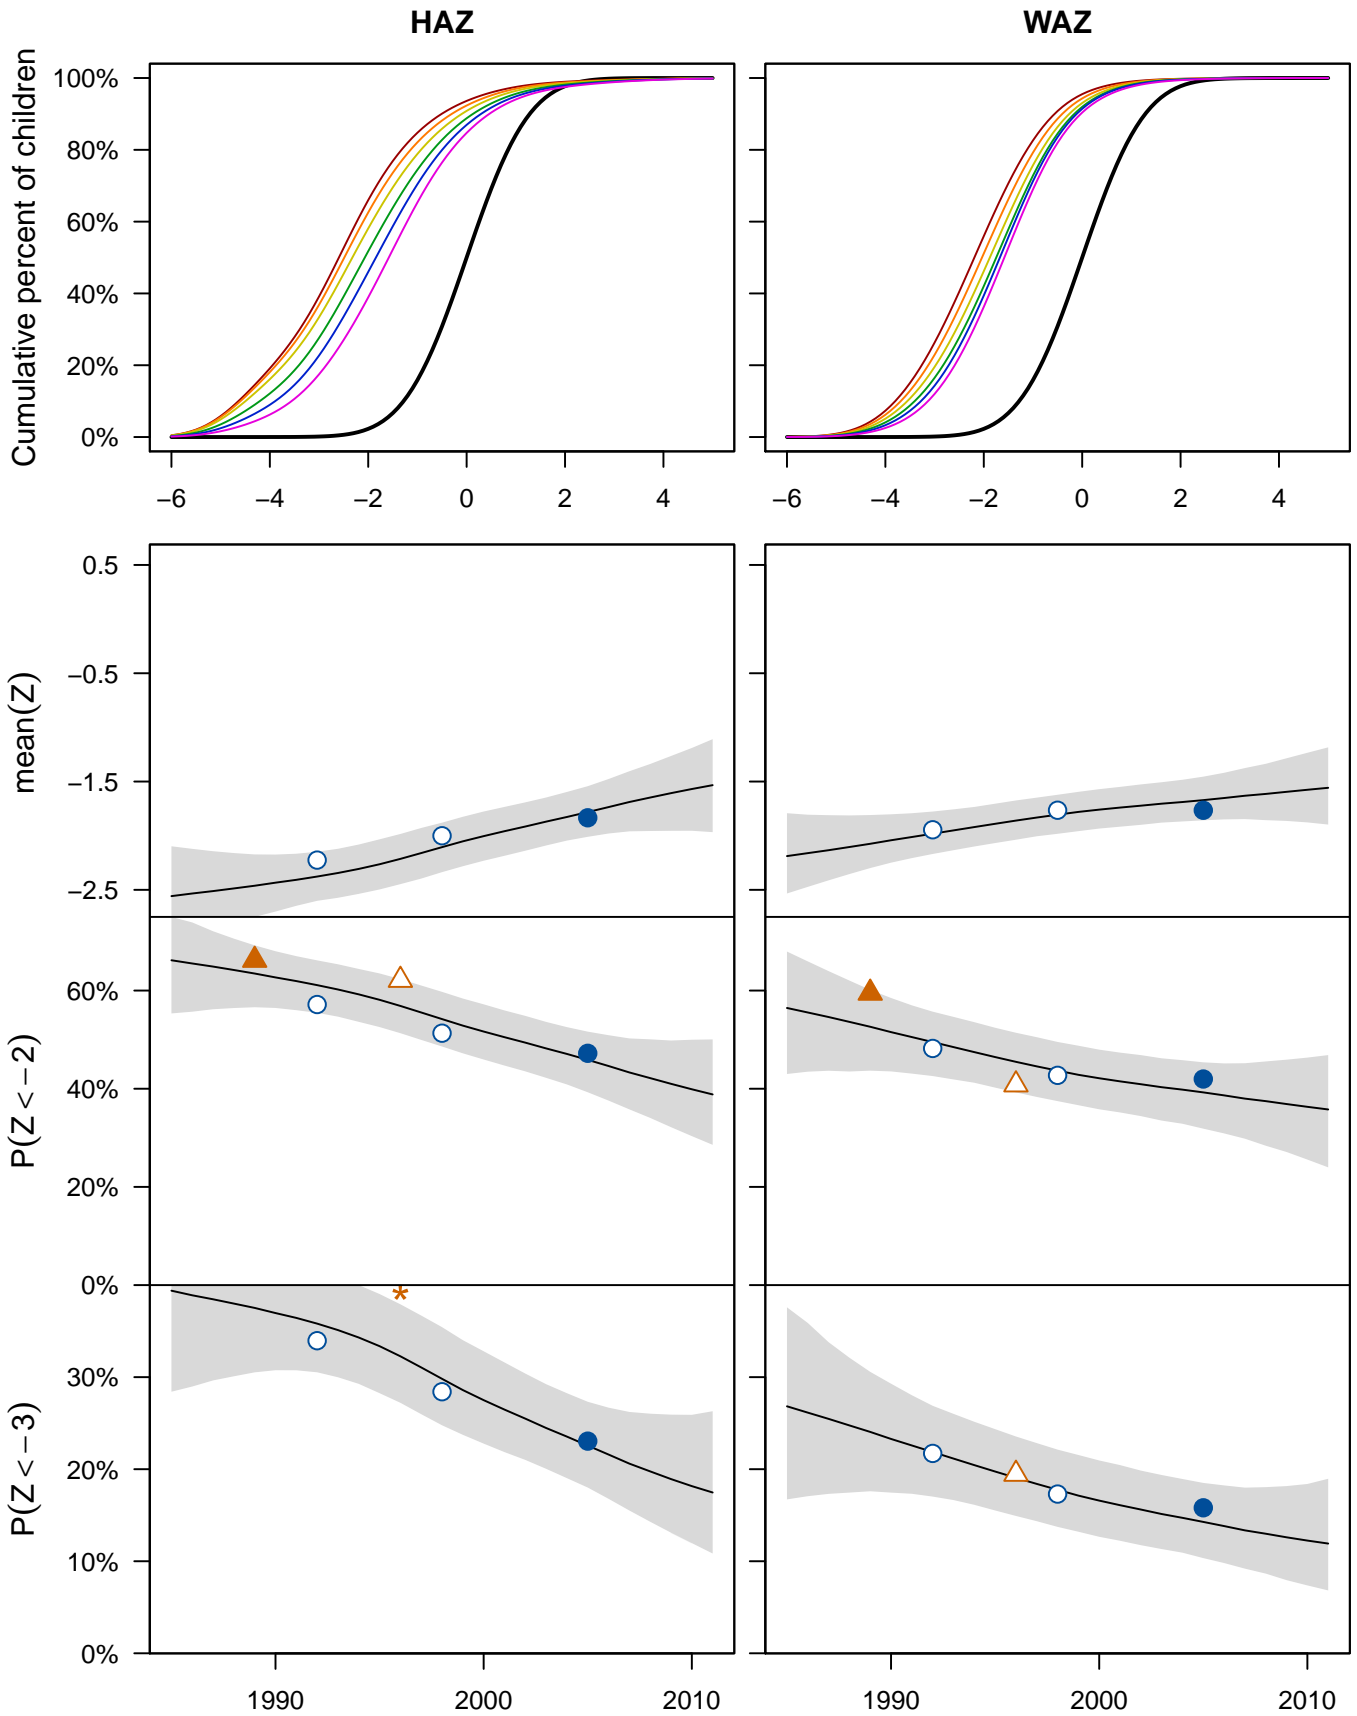

# Indonesia

East and Southeast Asia Region

HAZ

WAZ

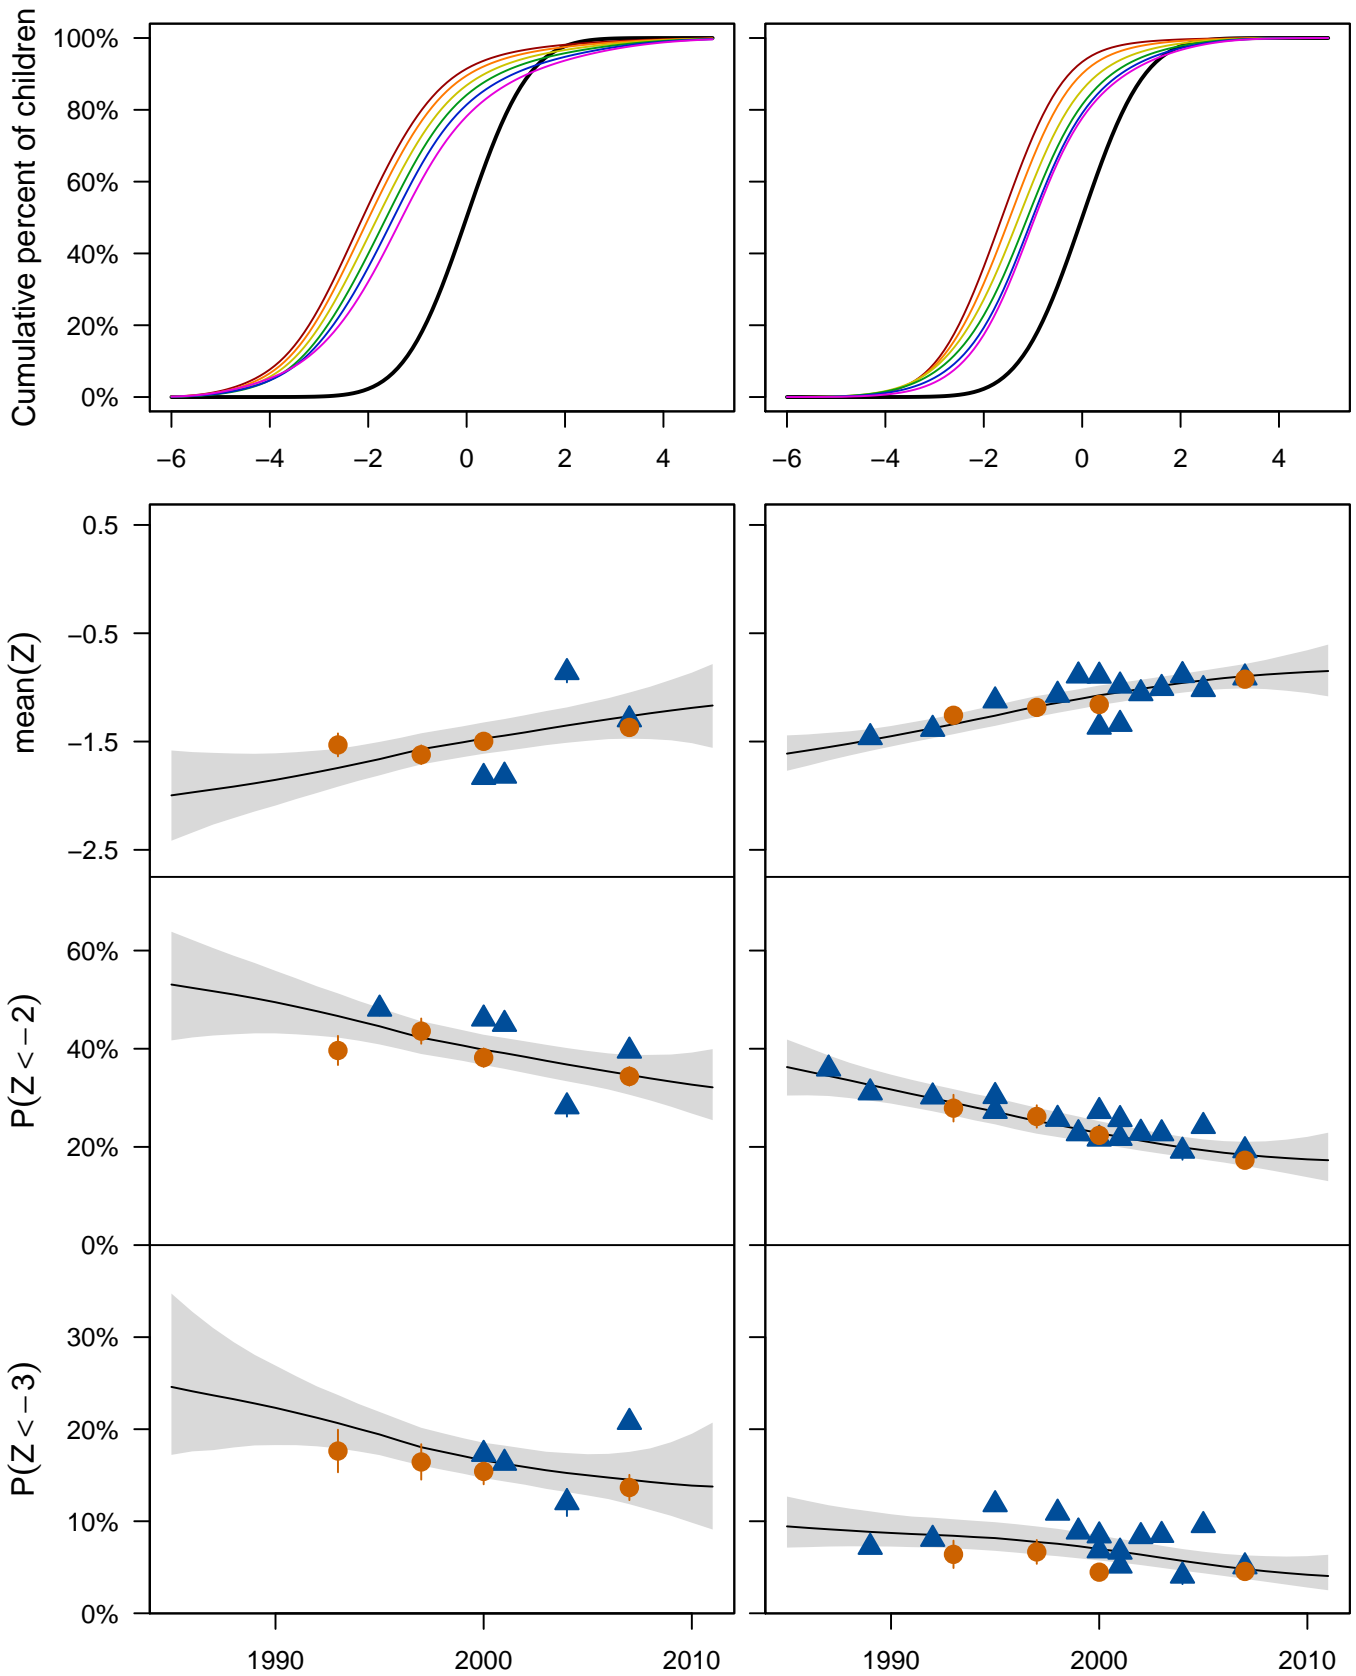

# Iran (Islamic Republic of)

Central Asia, Middle East, and North Africa Region

HAZ

WAZ

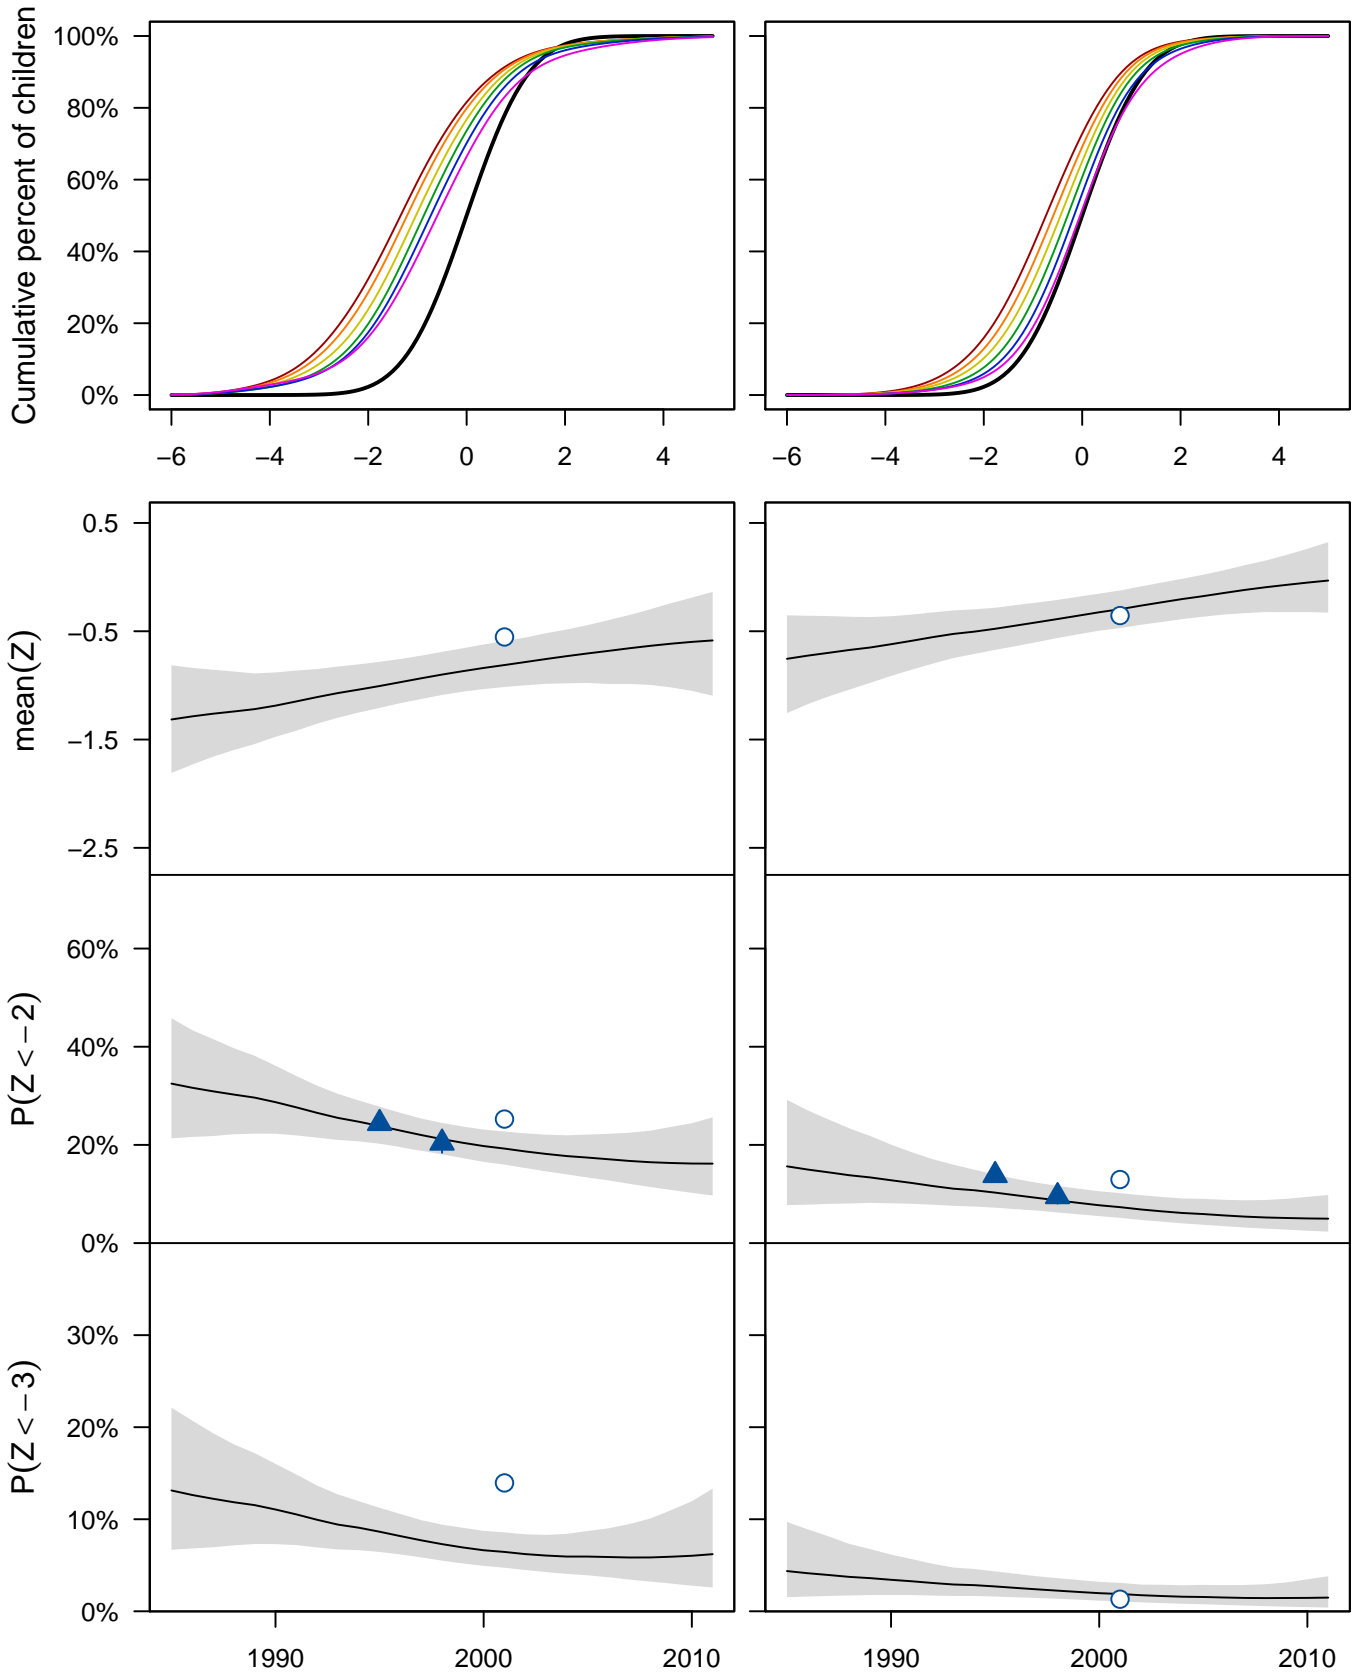



# Iraq

Central Asia, Middle East, and North Africa Region

HAZ

WAZ

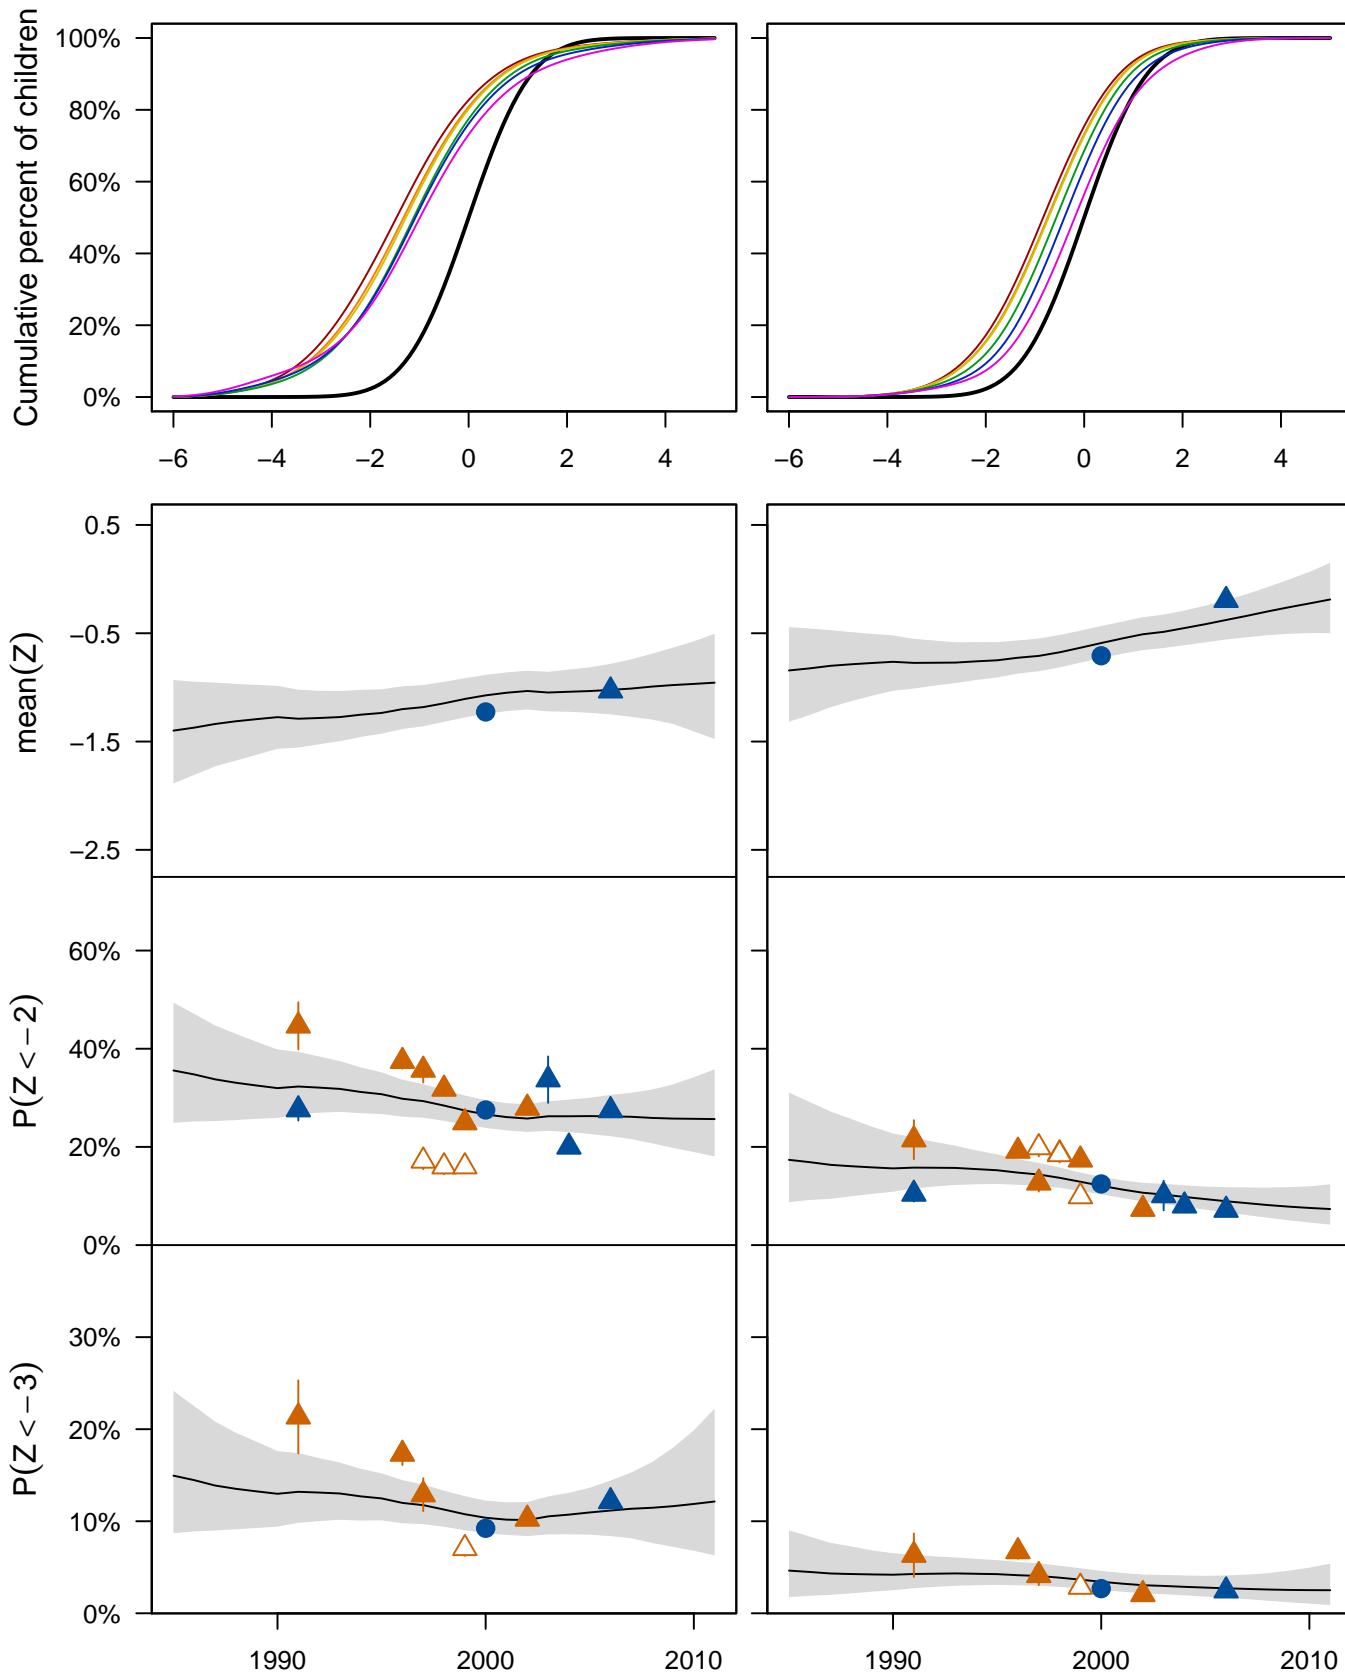

# Jamaica

Andean and Central Latin America and Caribbean Region

HAZ

WAZ

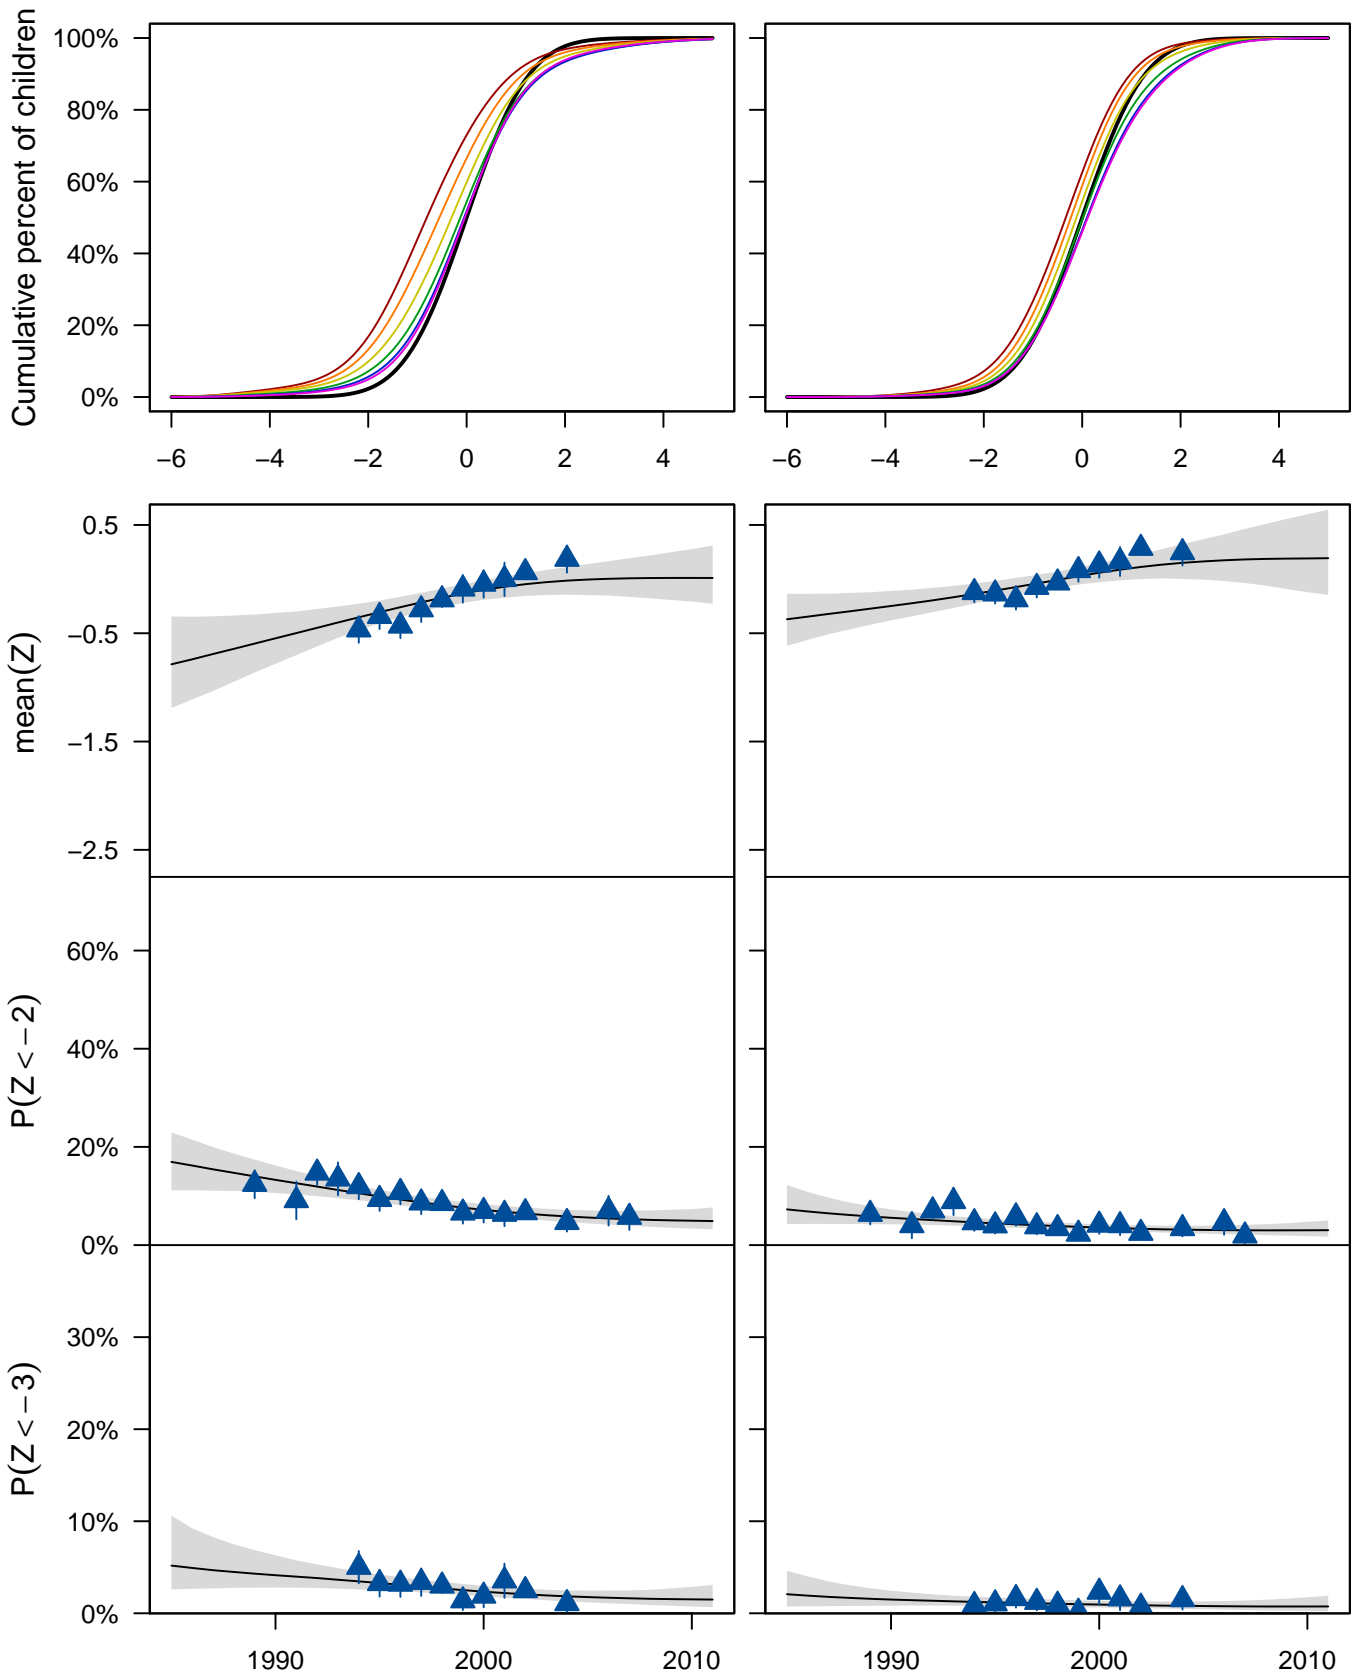

# Jordan

Central Asia, Middle East, and North Africa Region

HAZ

WAZ

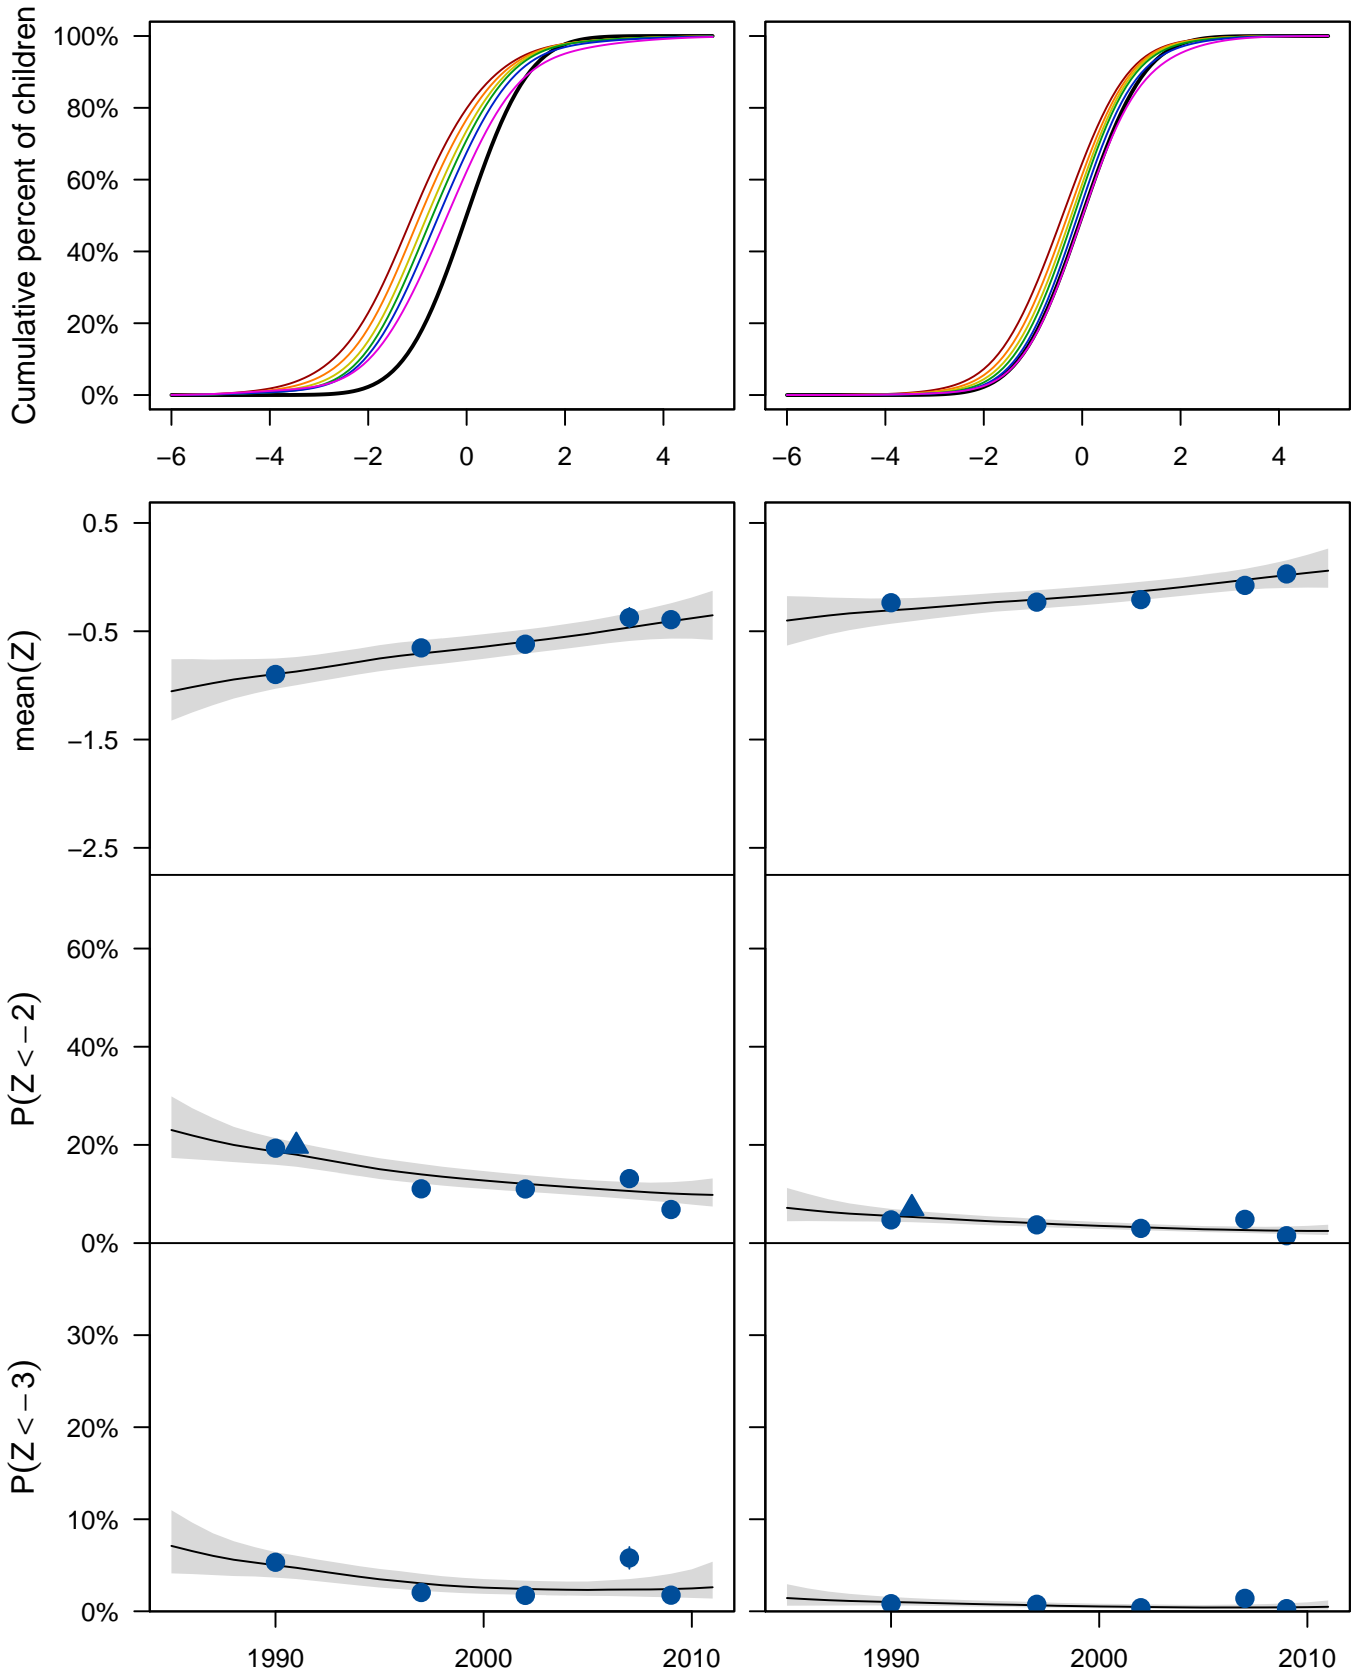

# Kazakhstan

Central Asia, Middle East, and North Africa Region

HAZ

WAZ

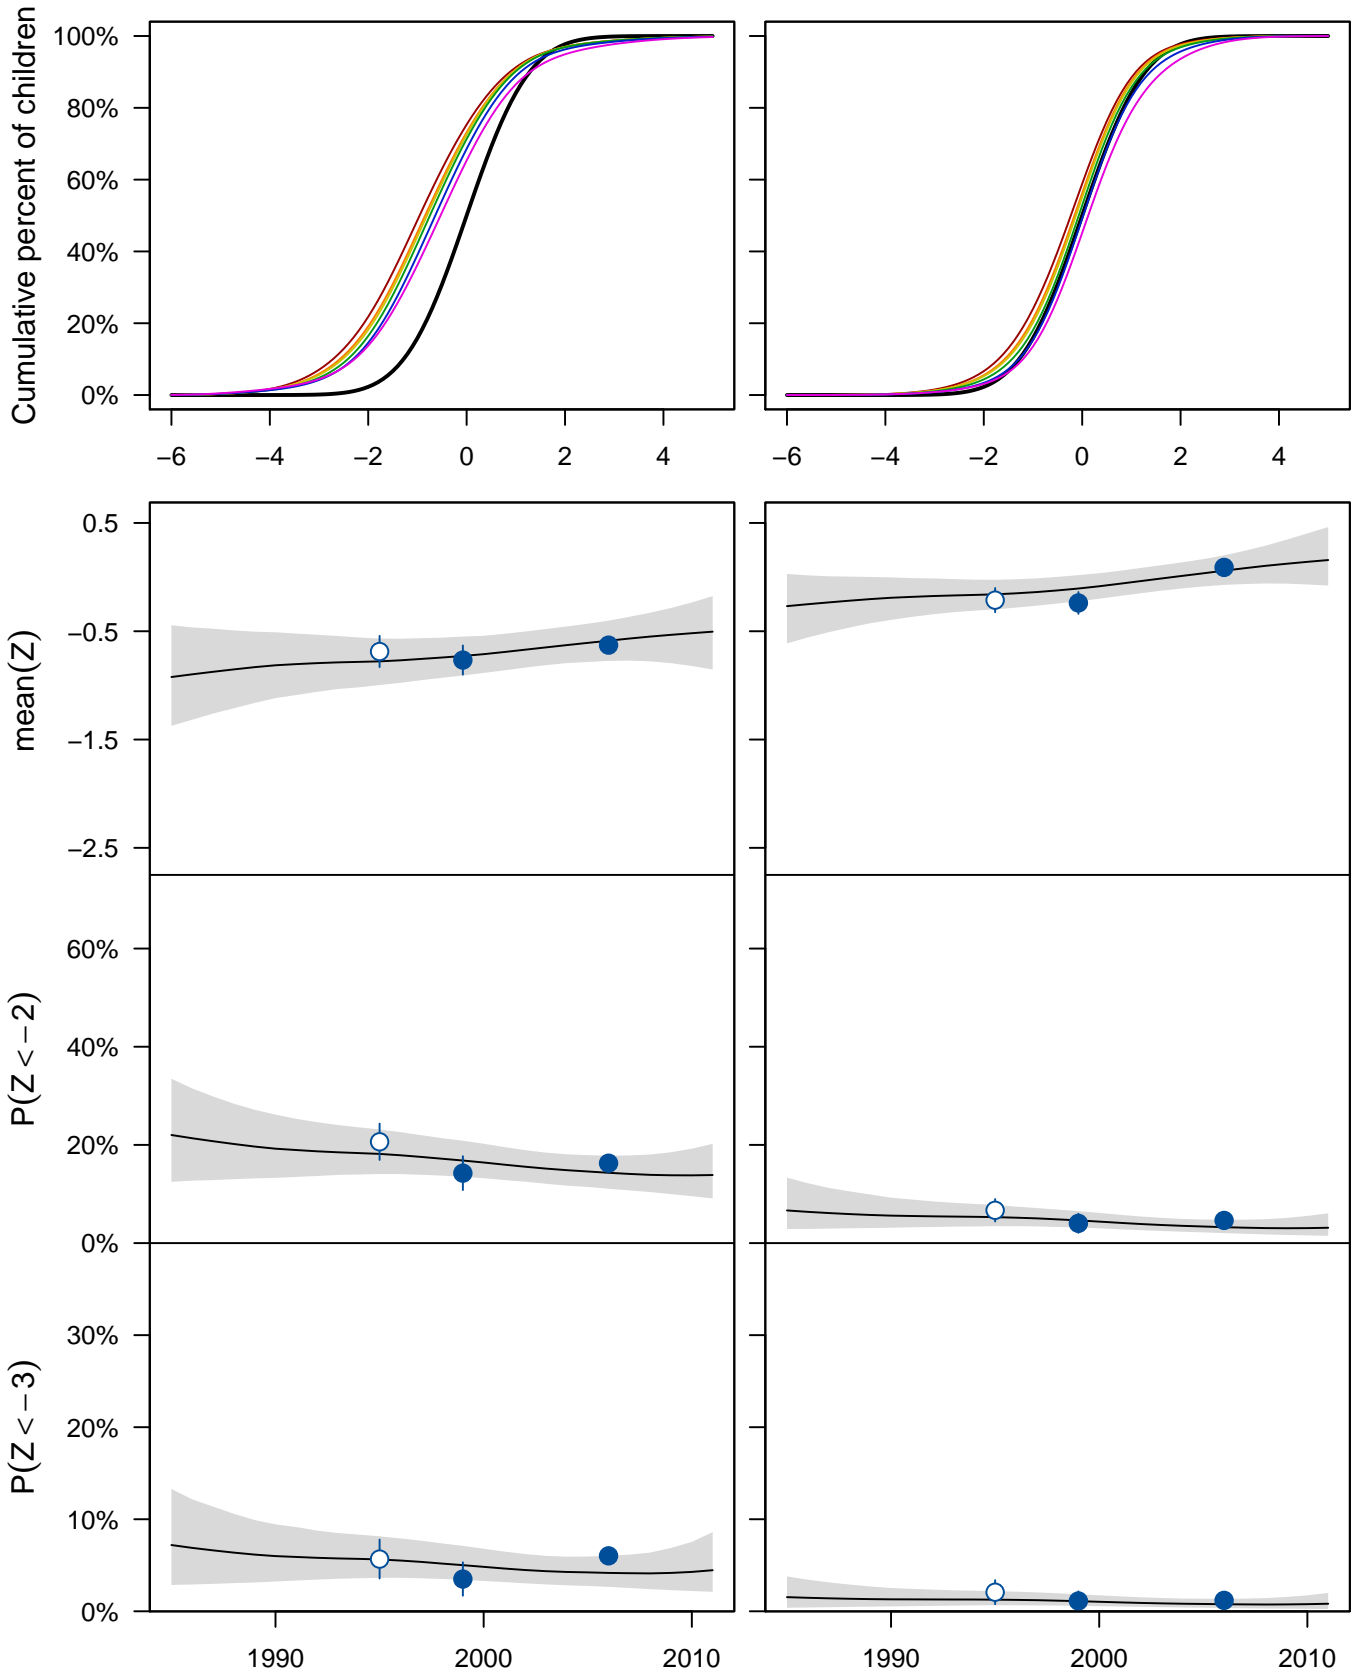

# Kenya

## Sub-Saharan Africa Region

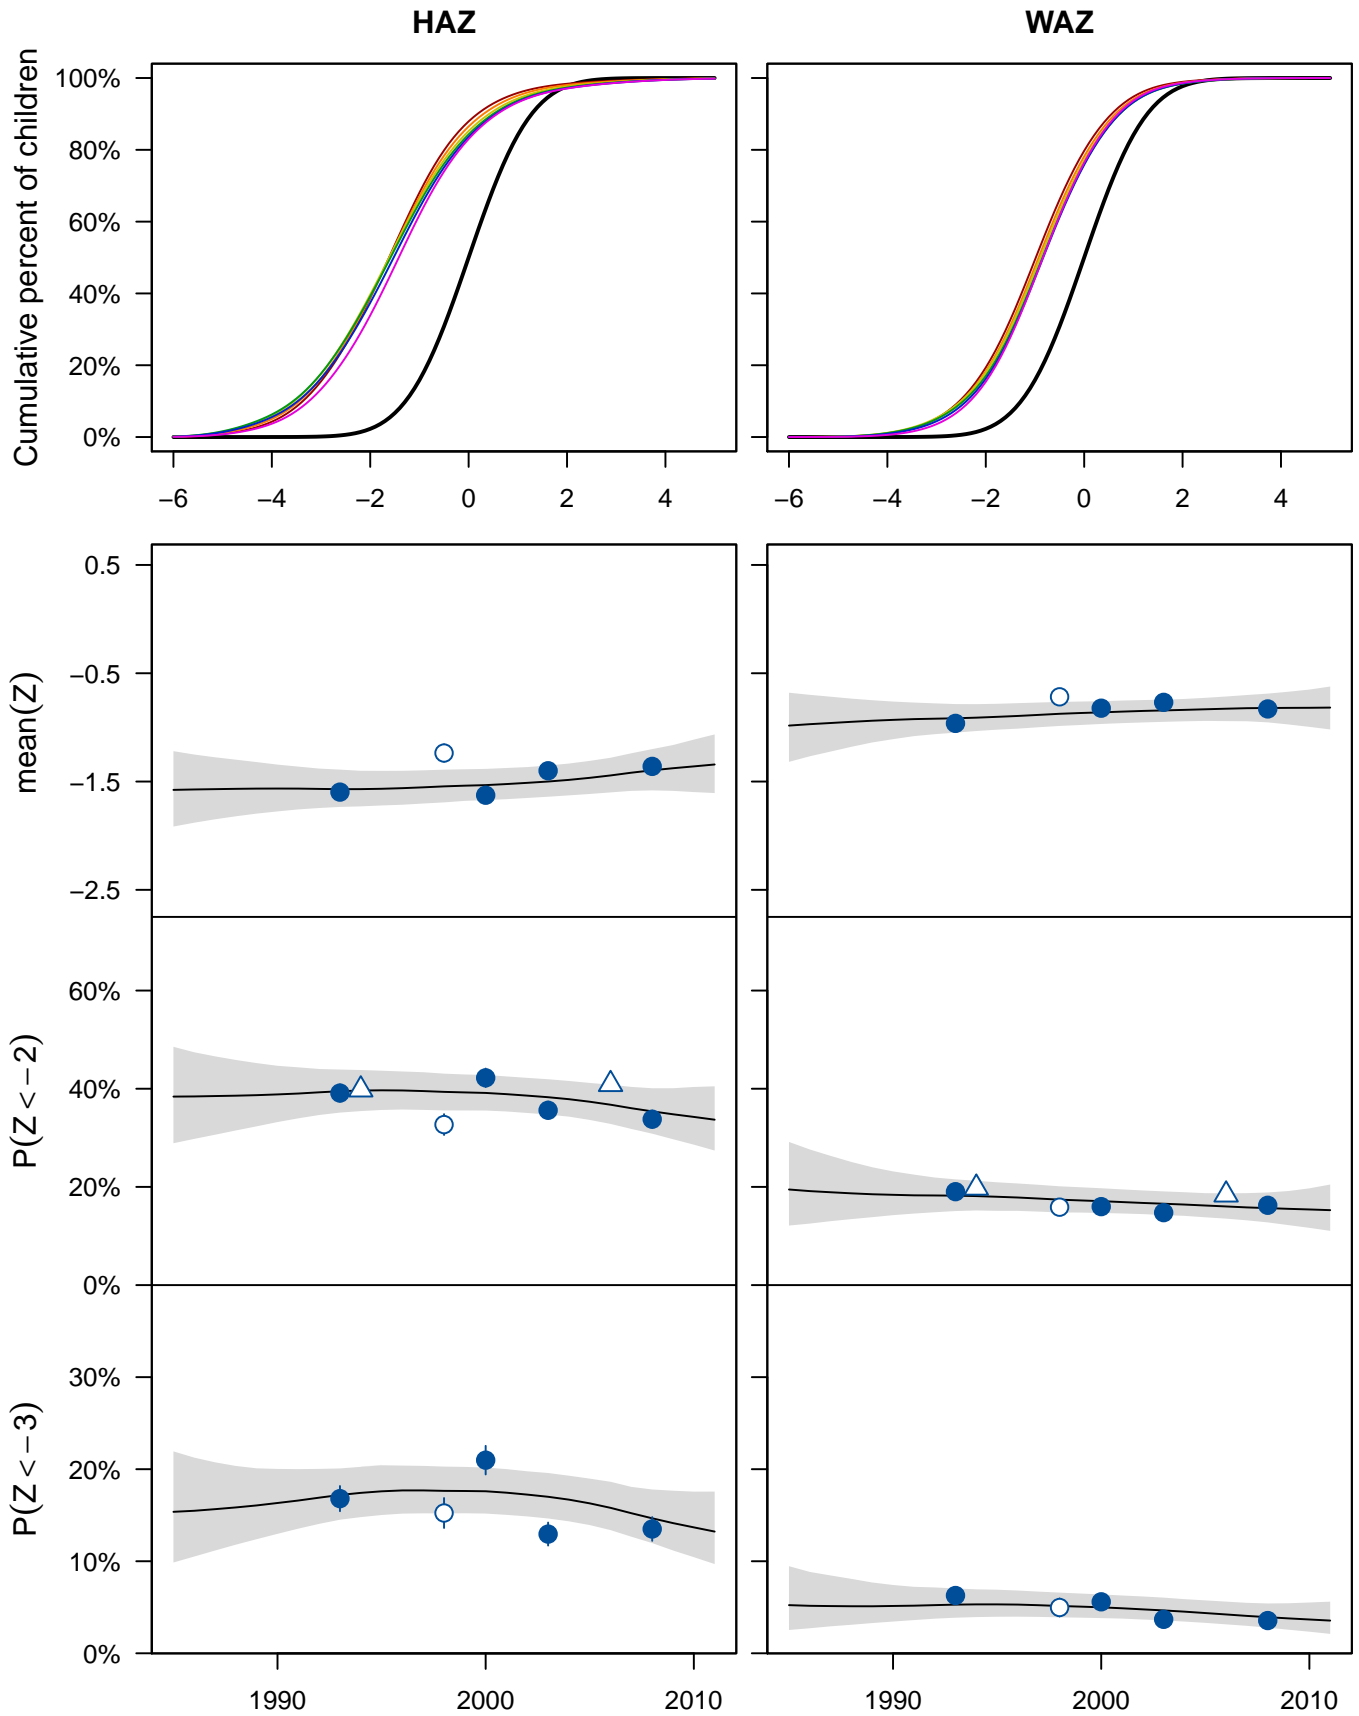

# Kiribati

Oceania Region

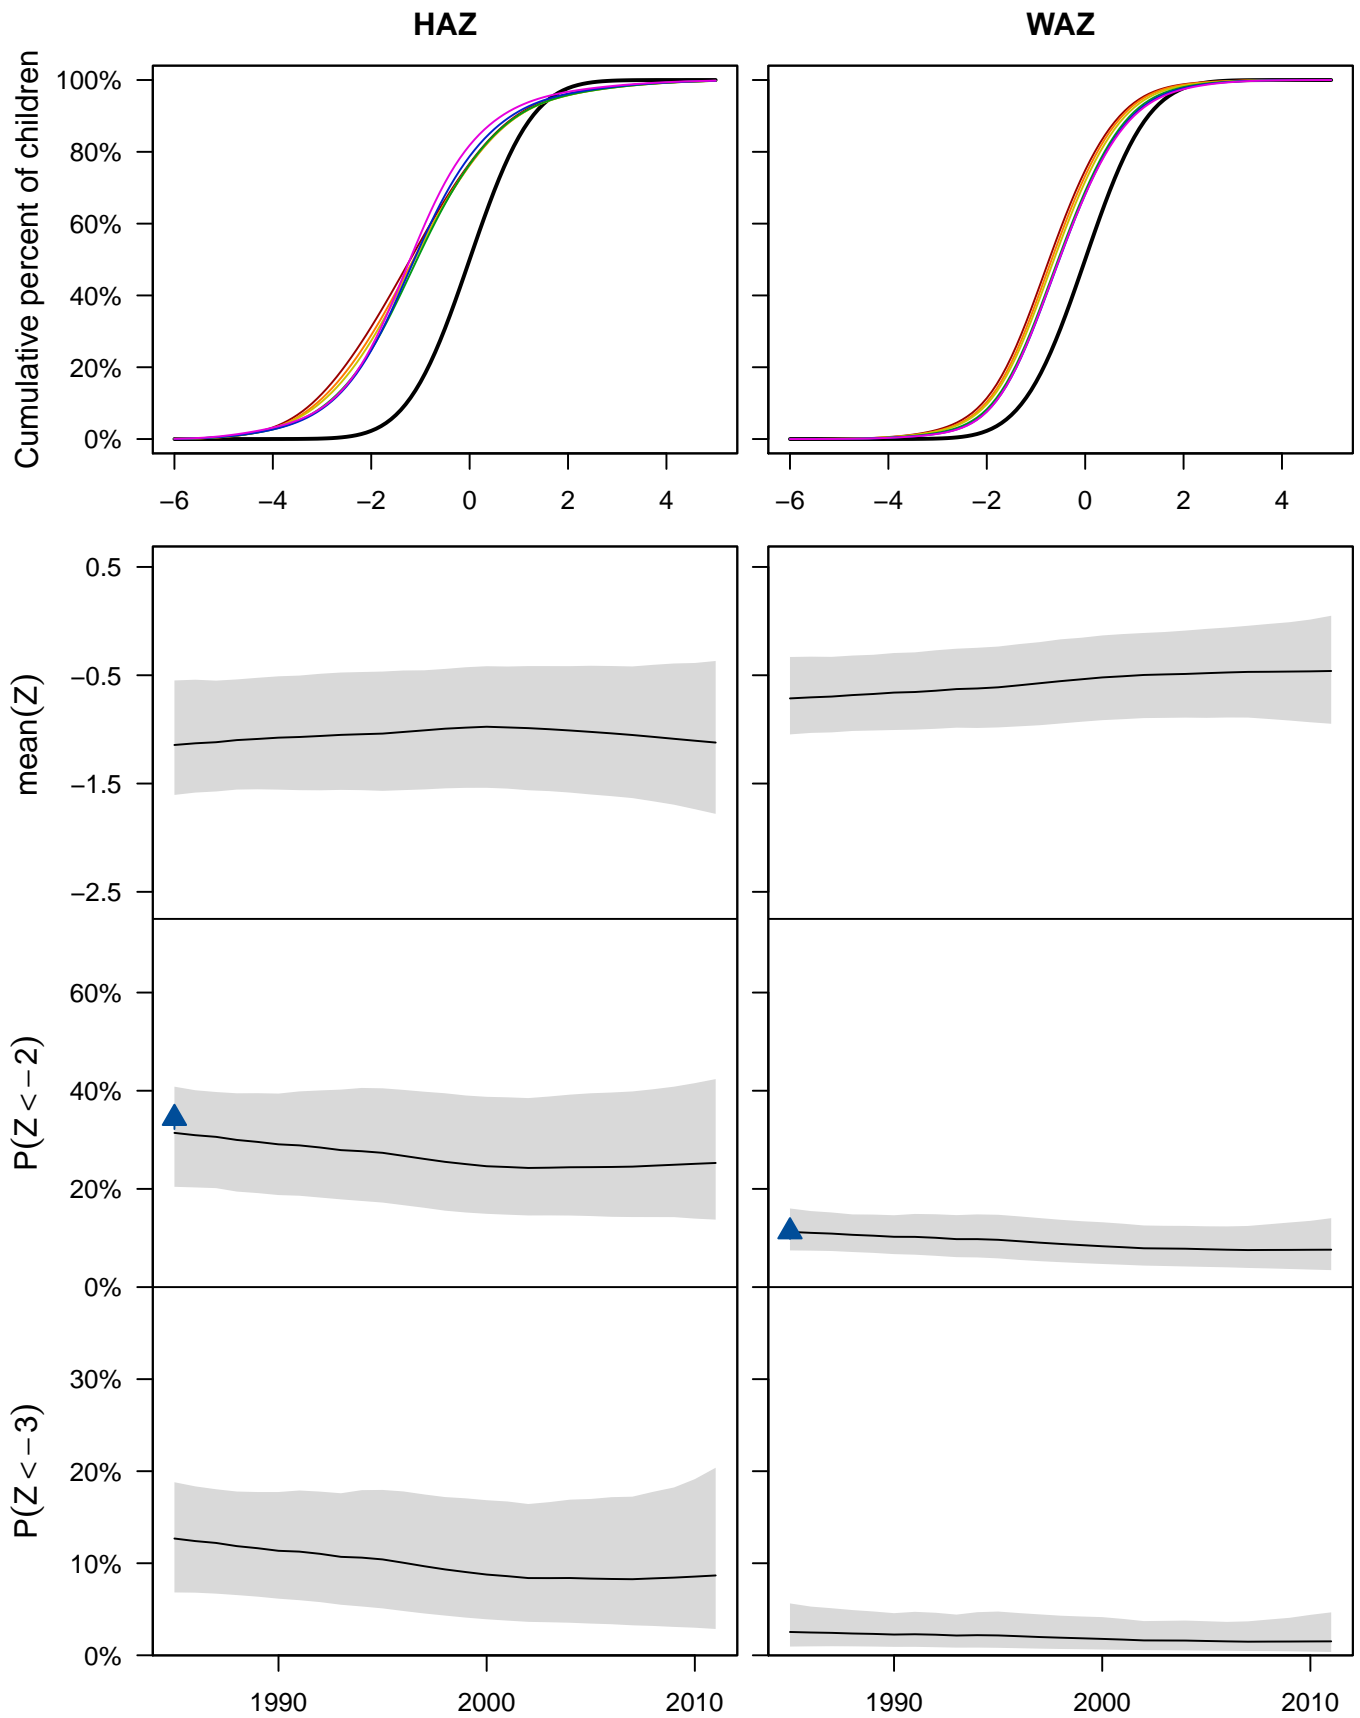

# Kuwait

Central Asia, Middle East, and North Africa Region

HAZ

WAZ

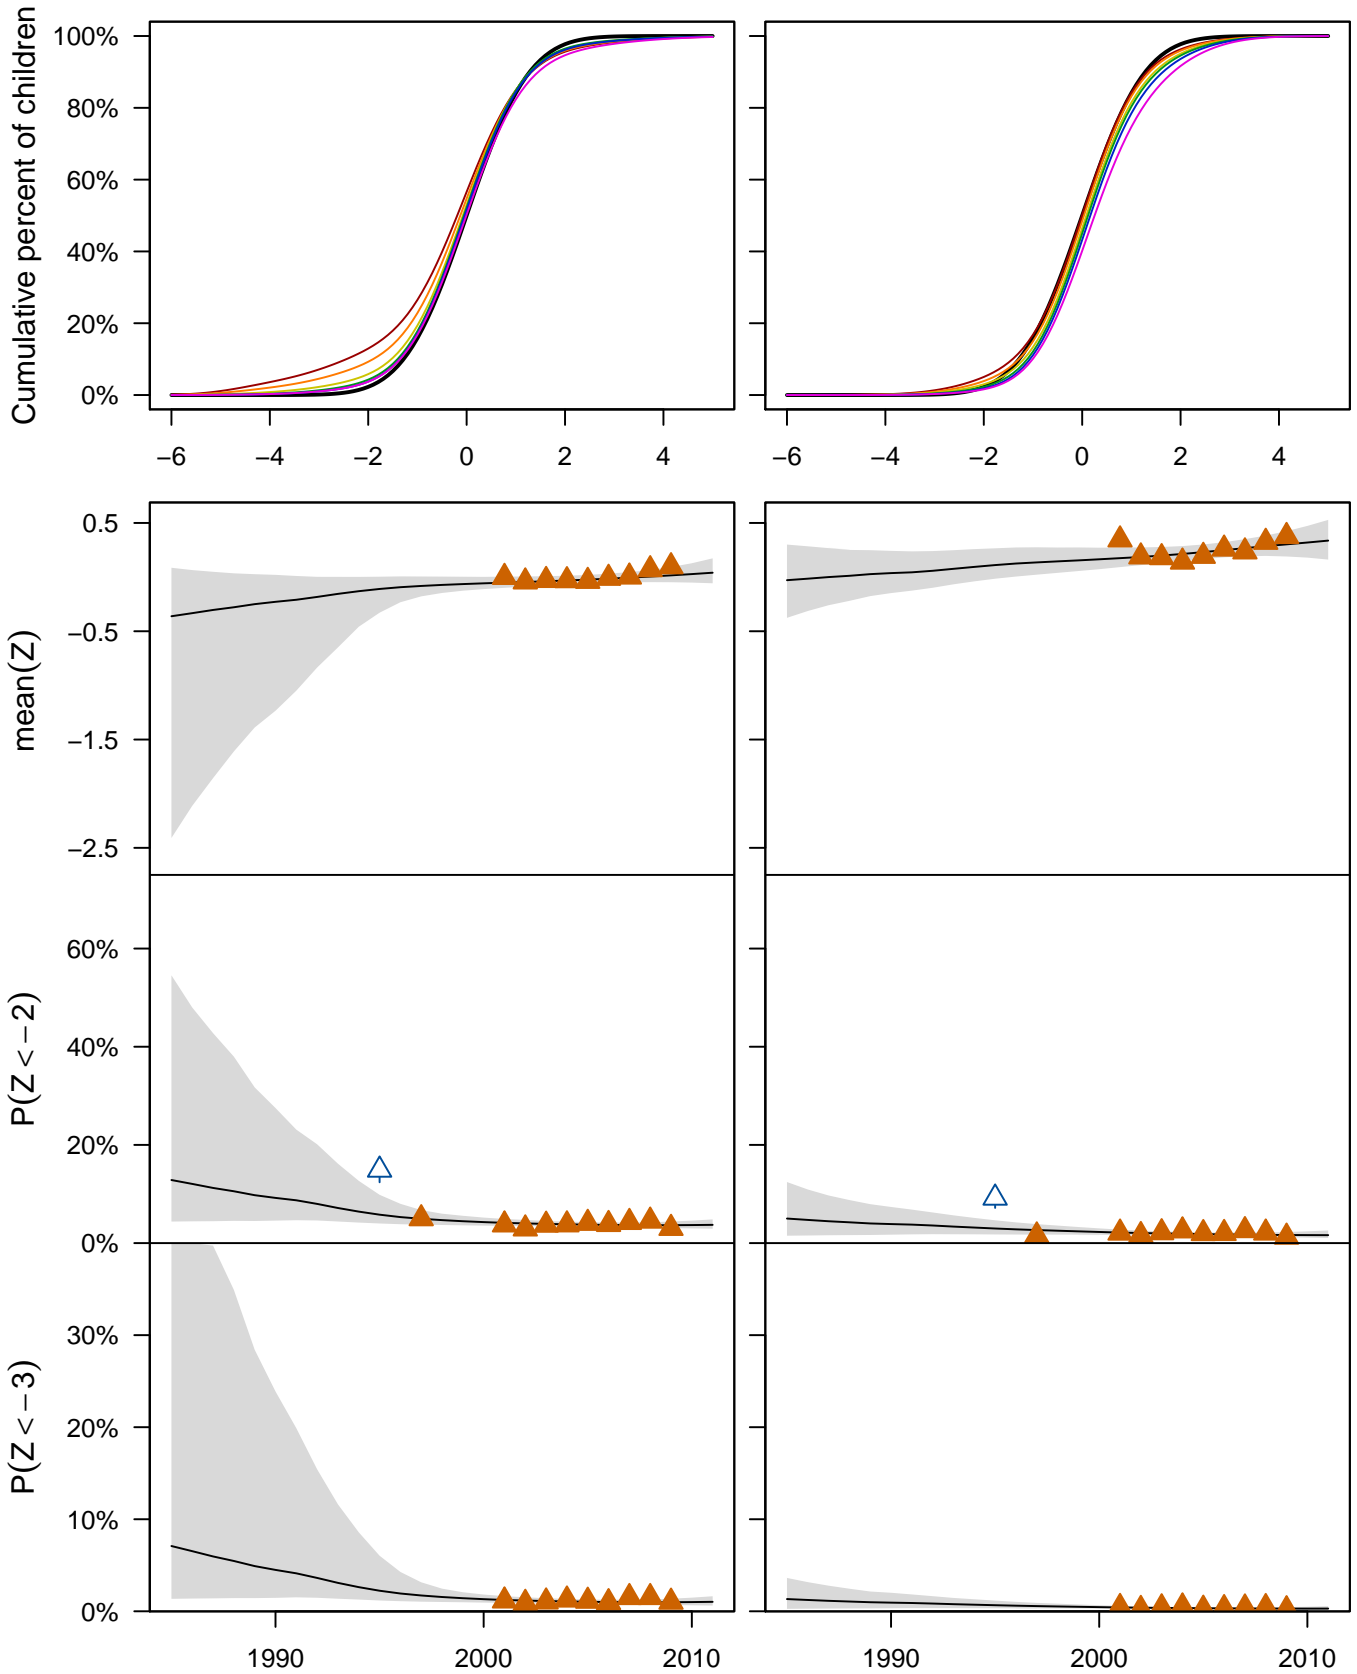

# Kyrgyzstan

Central Asia, Middle East, and North Africa Region

HAZ

WAZ

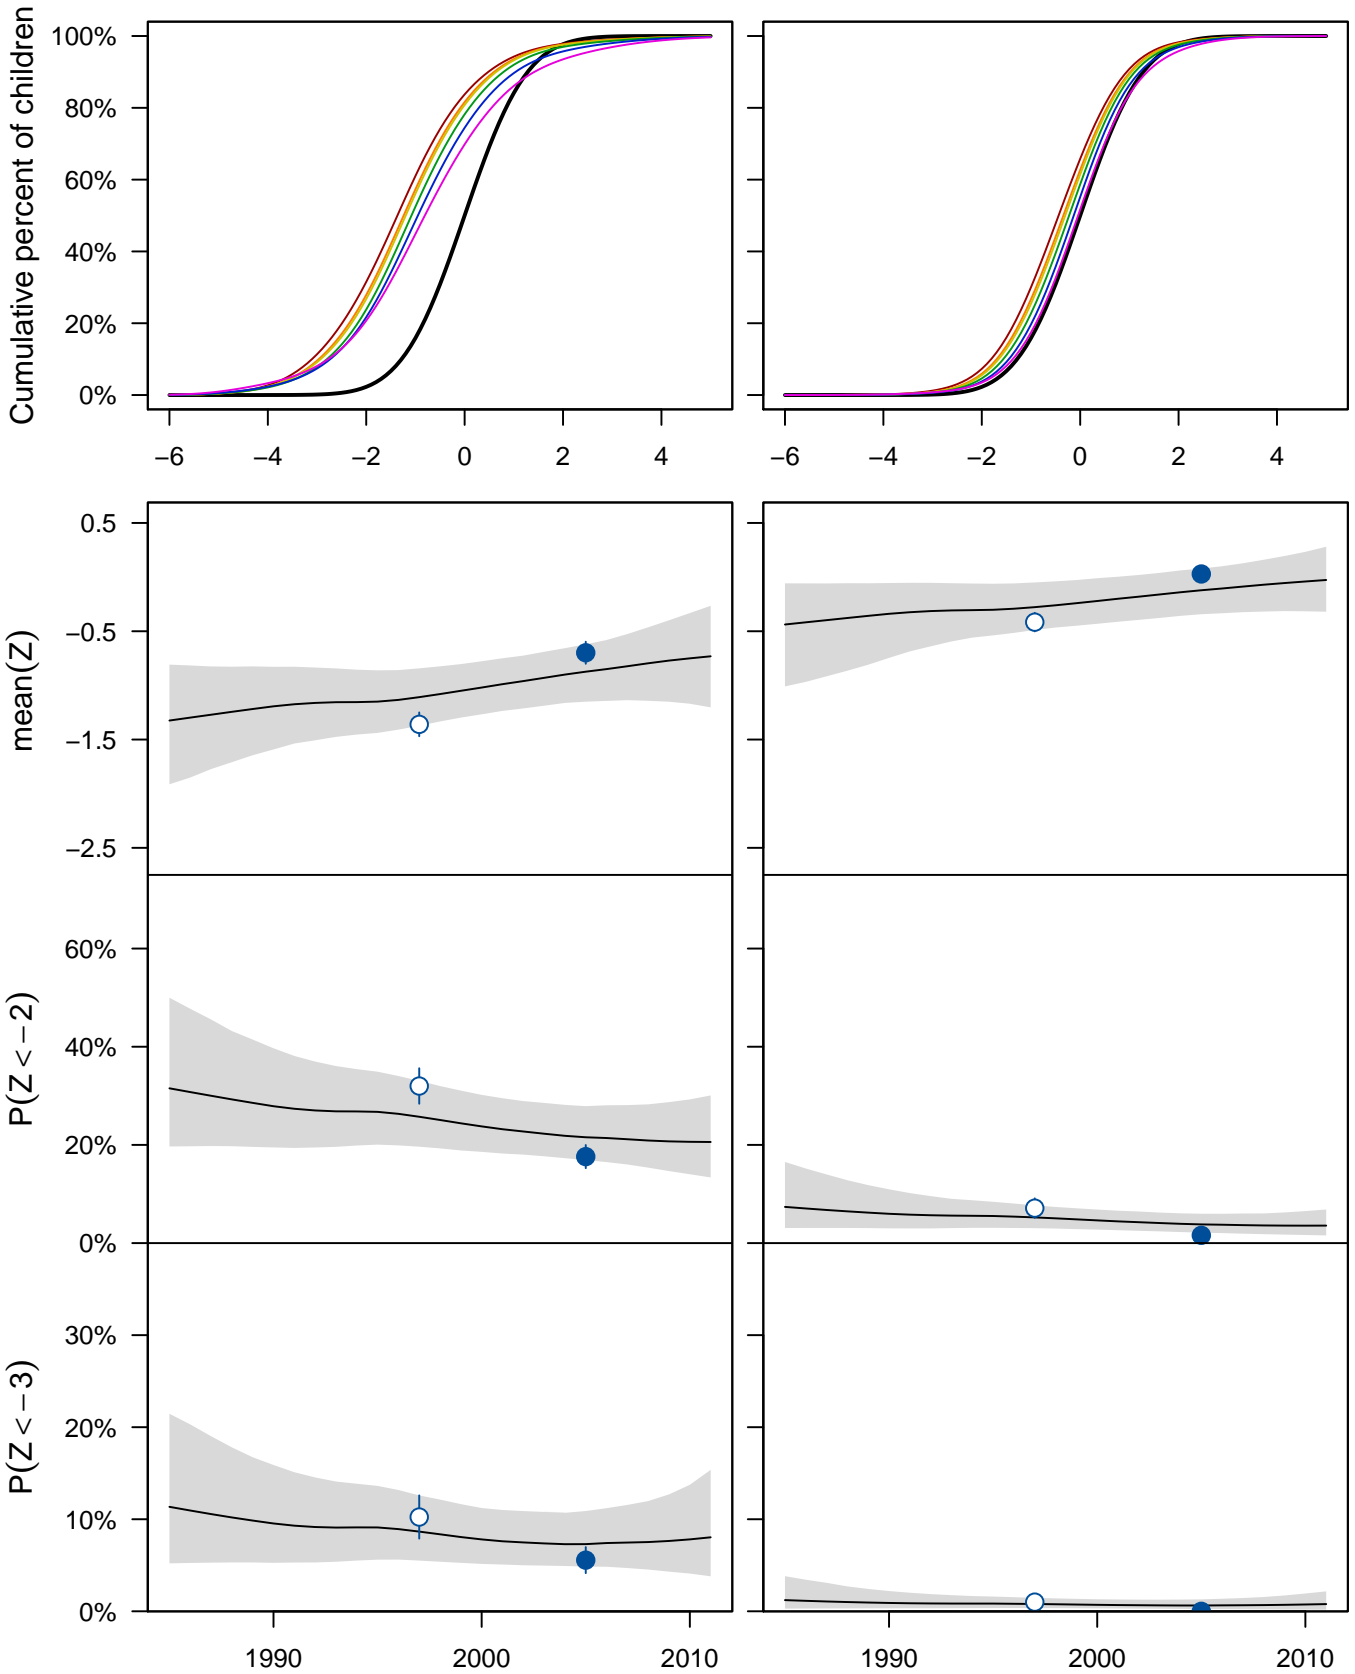



# Lao People's Democratic Republic

East and Southeast Asia Region

HAZ

WAZ

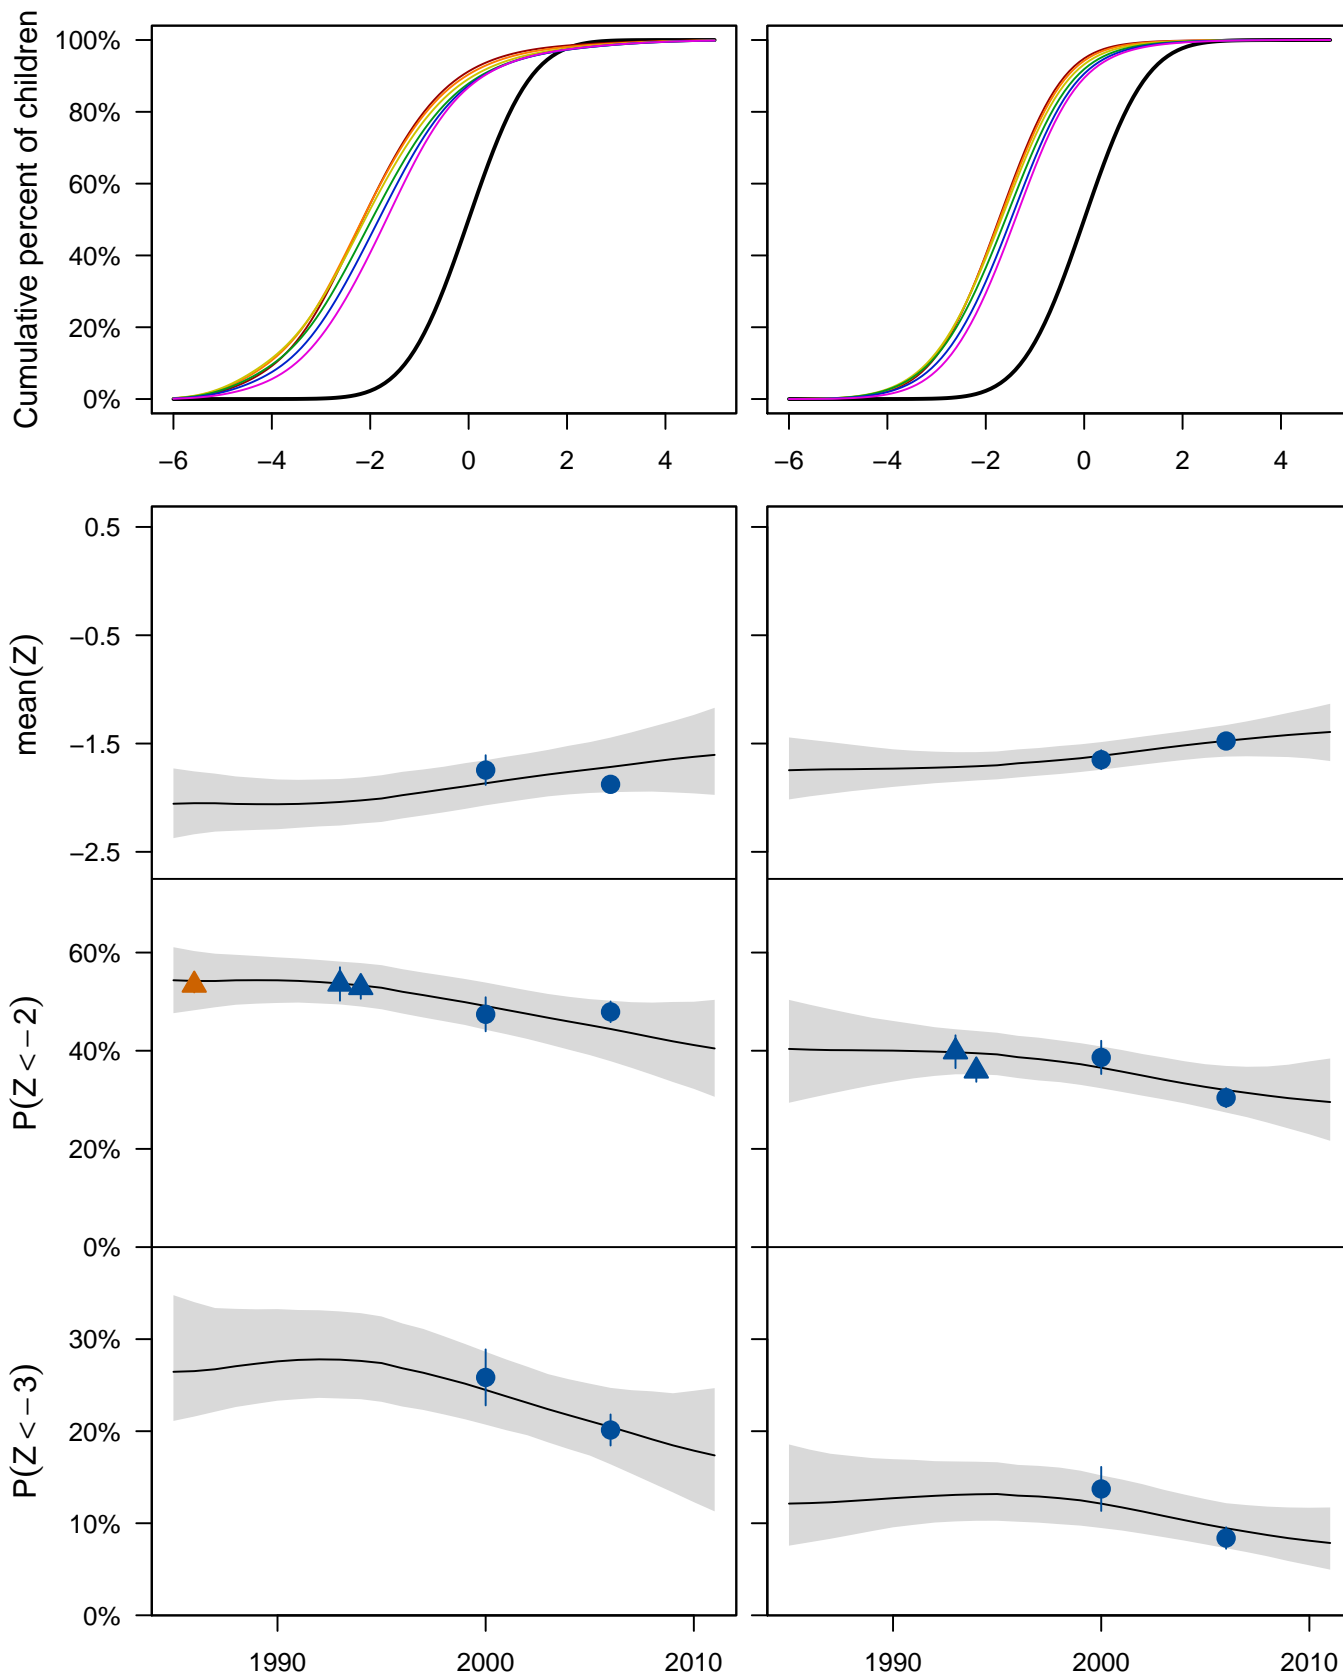

# Lebanon

Central Asia, Middle East, and North Africa Region

HAZ

WAZ

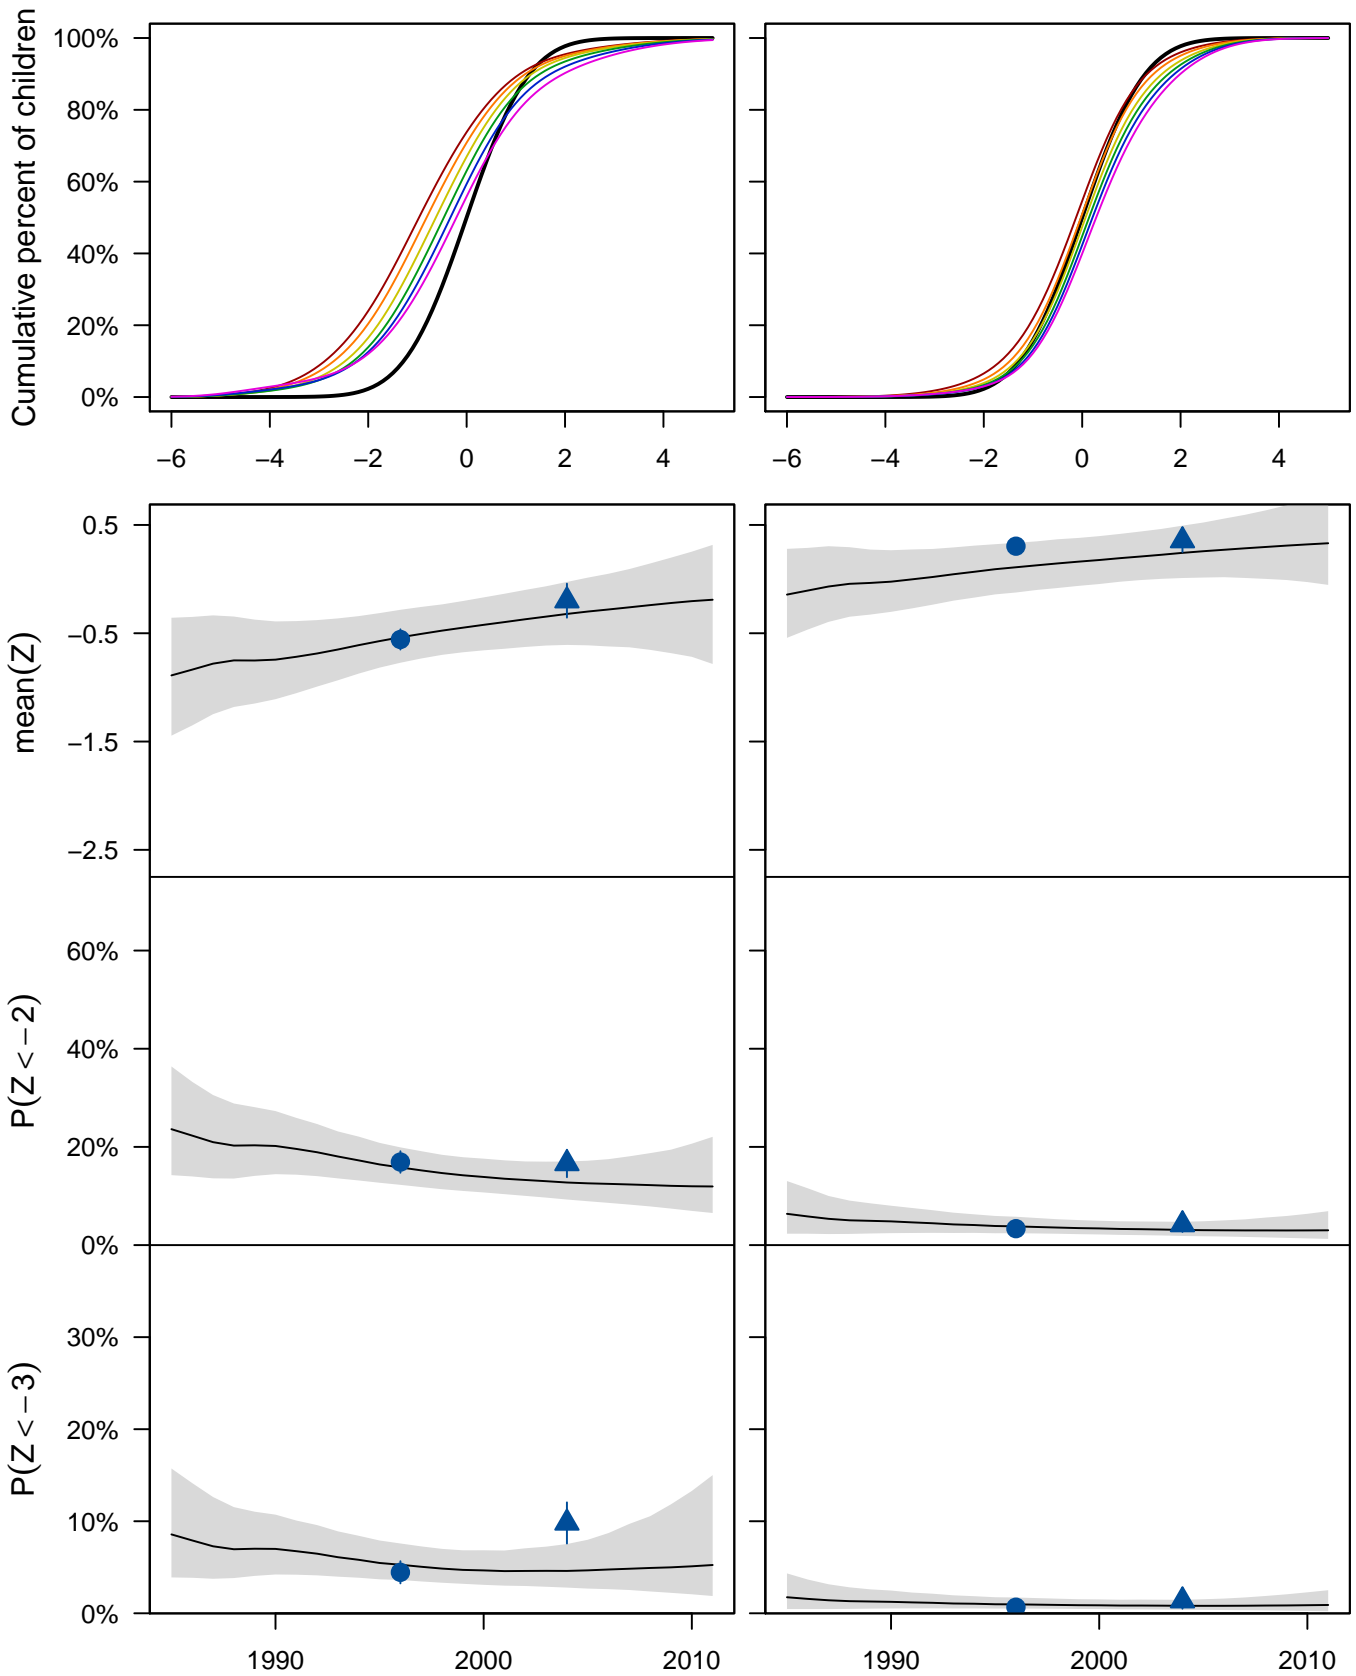

# Lesotho

## Sub-Saharan Africa Region

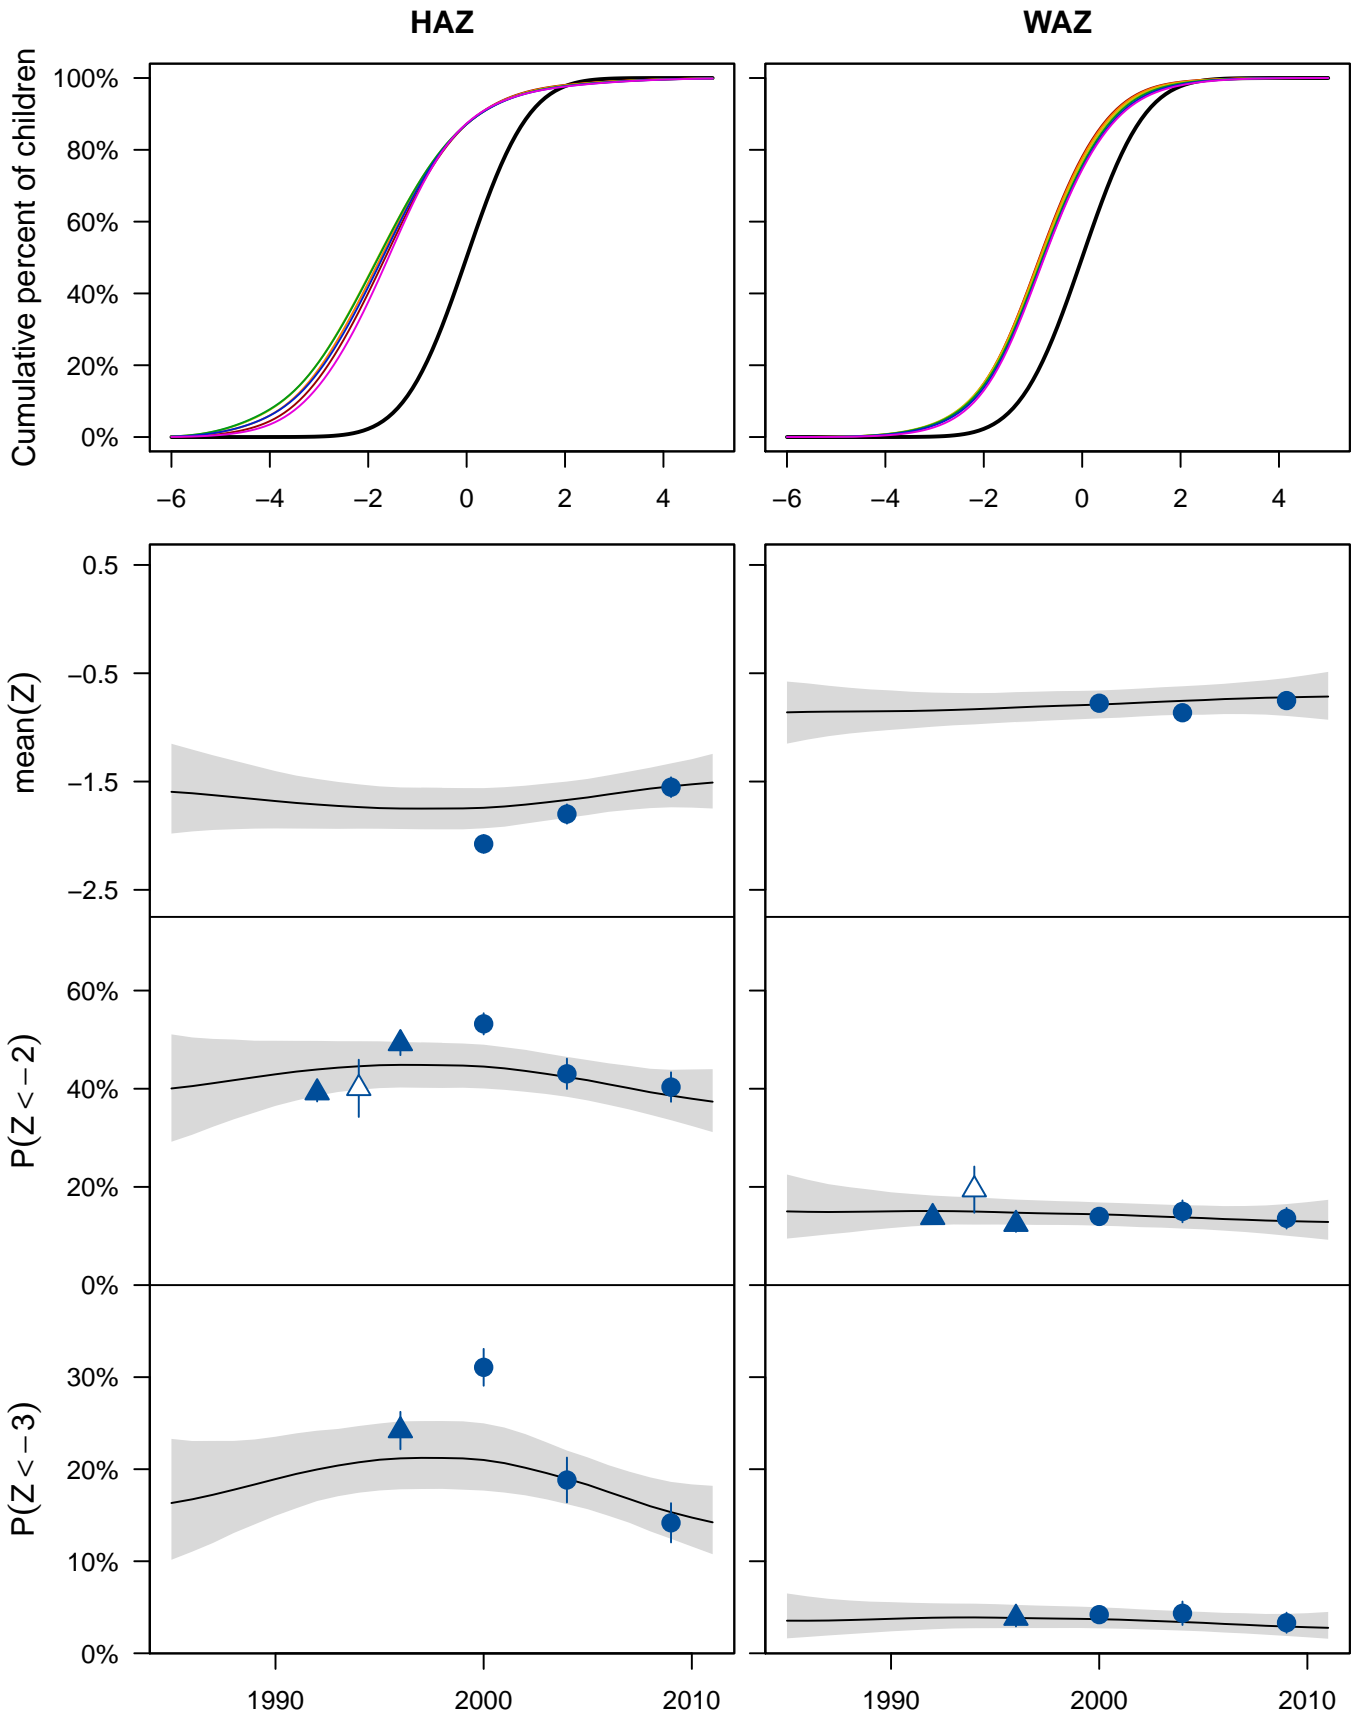

# Liberia

## Sub-Saharan Africa Region

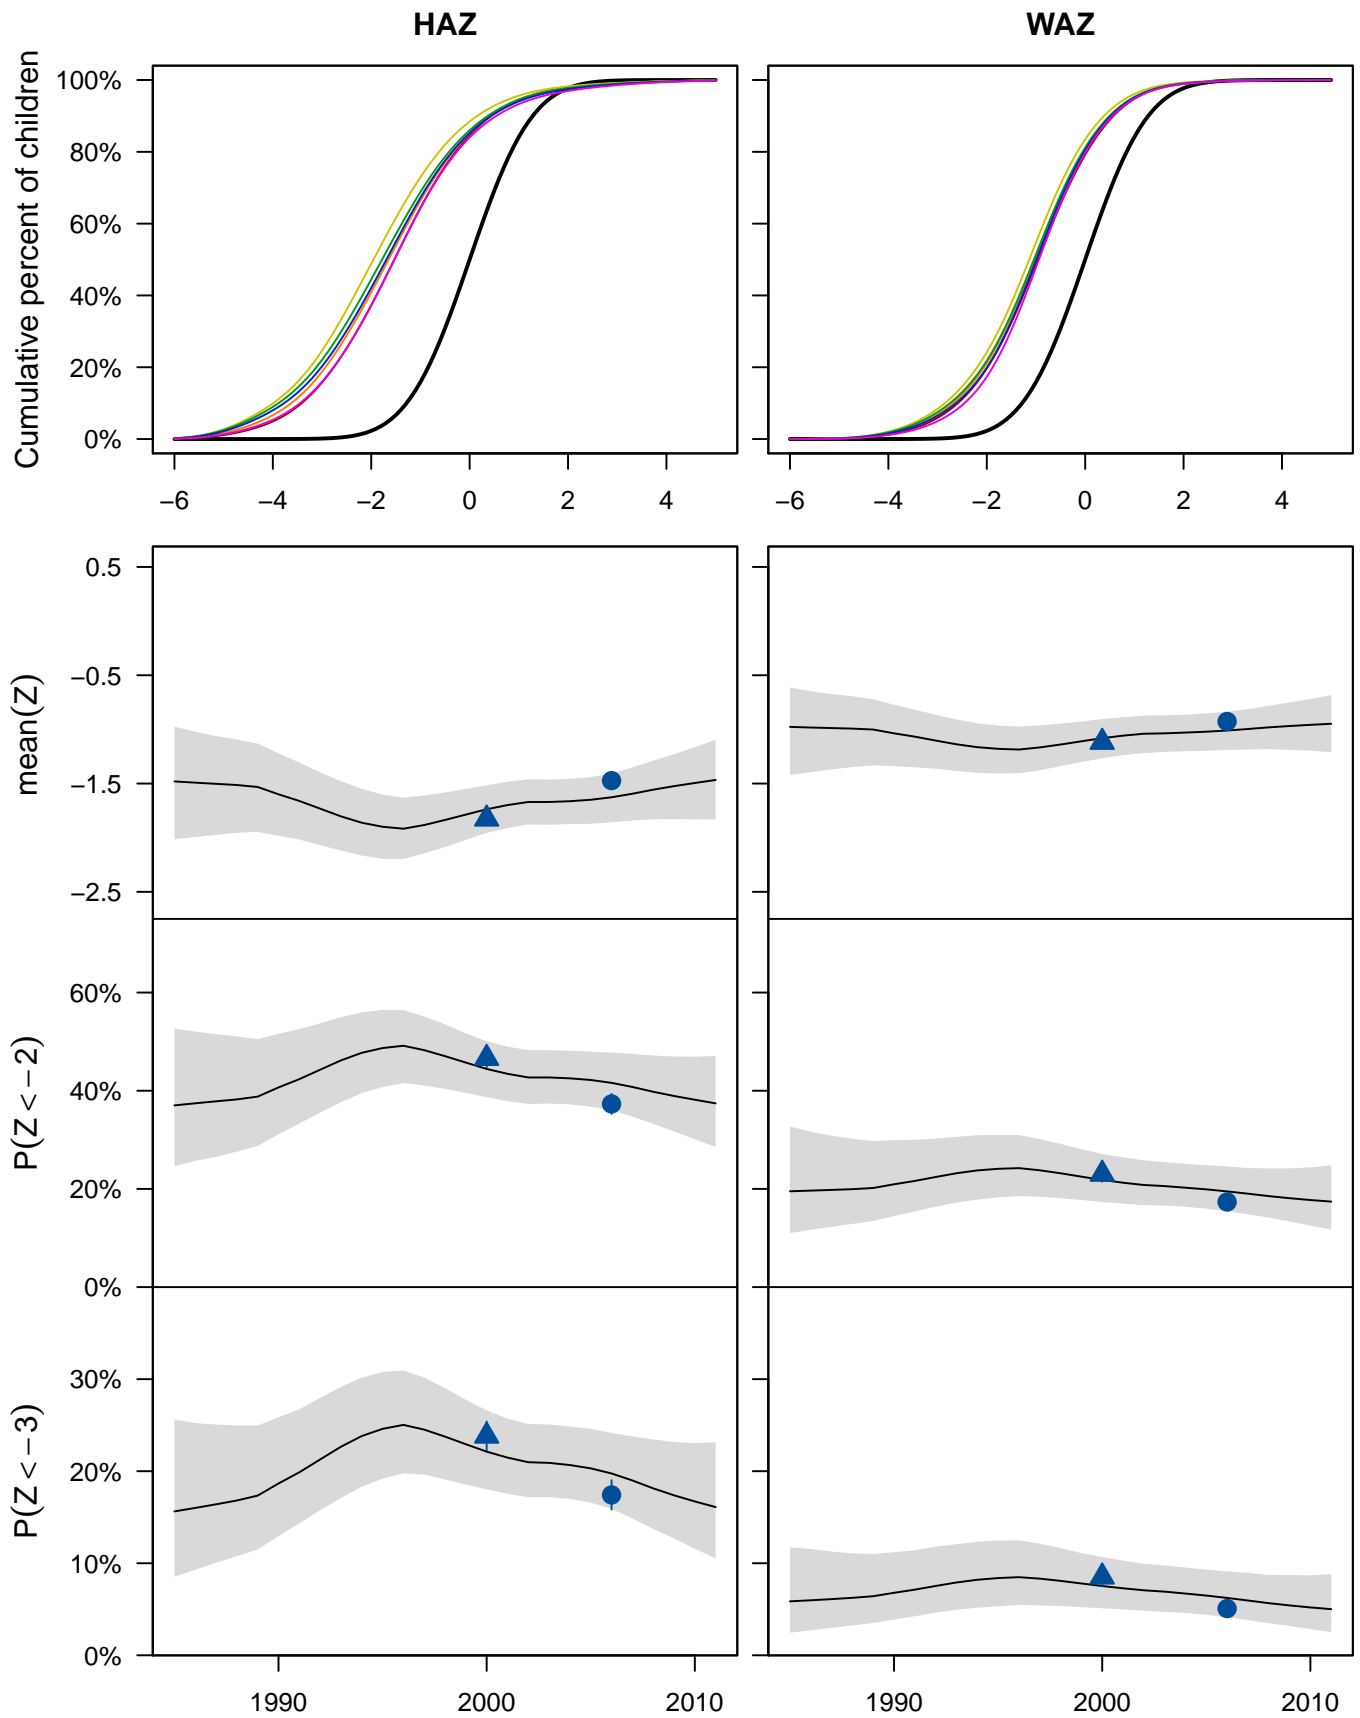

# Libyan Arab Jamahiriya

Central Asia, Middle East, and North Africa Region

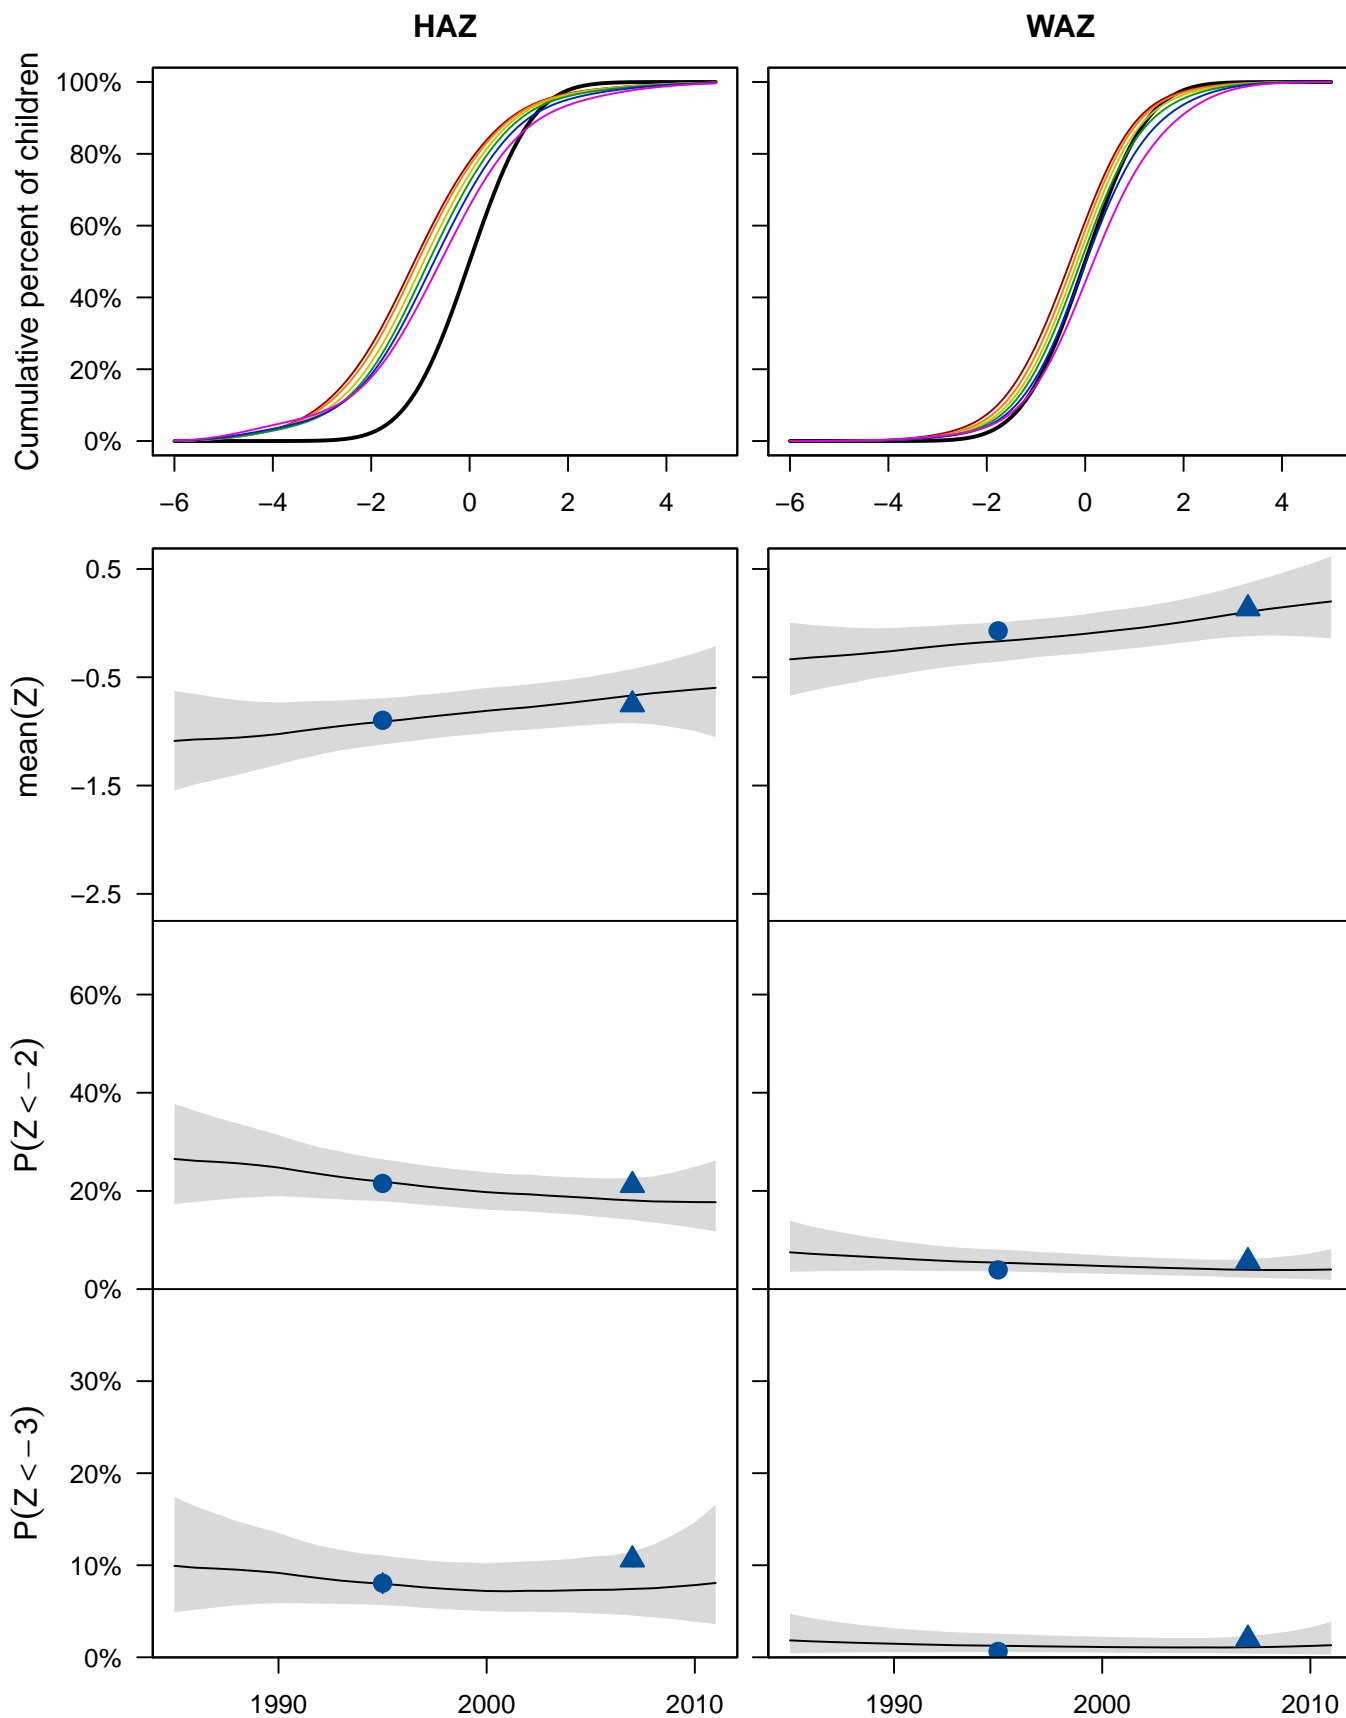

# Madagascar

## Sub-Saharan Africa Region

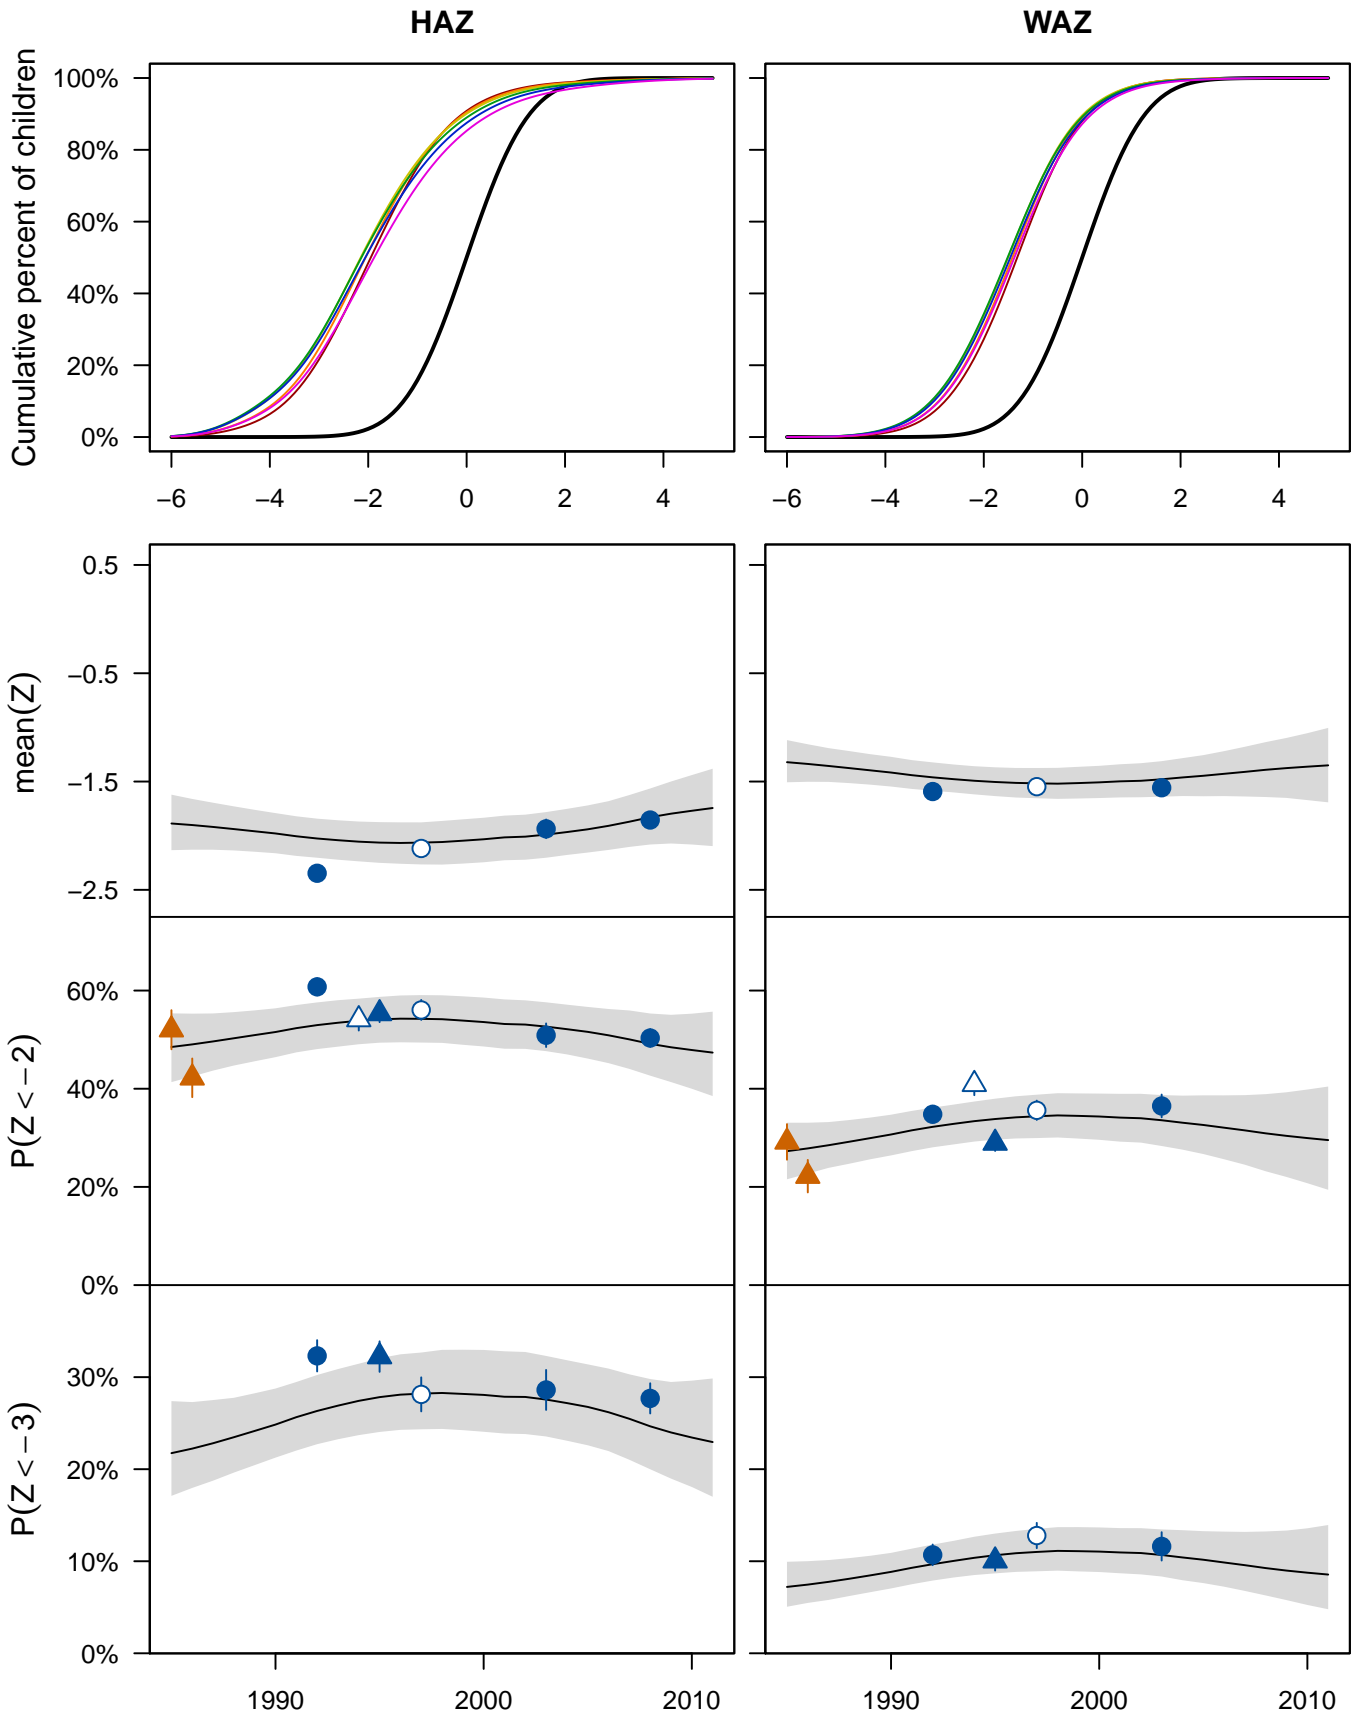

# Malawi

## Sub-Saharan Africa Region

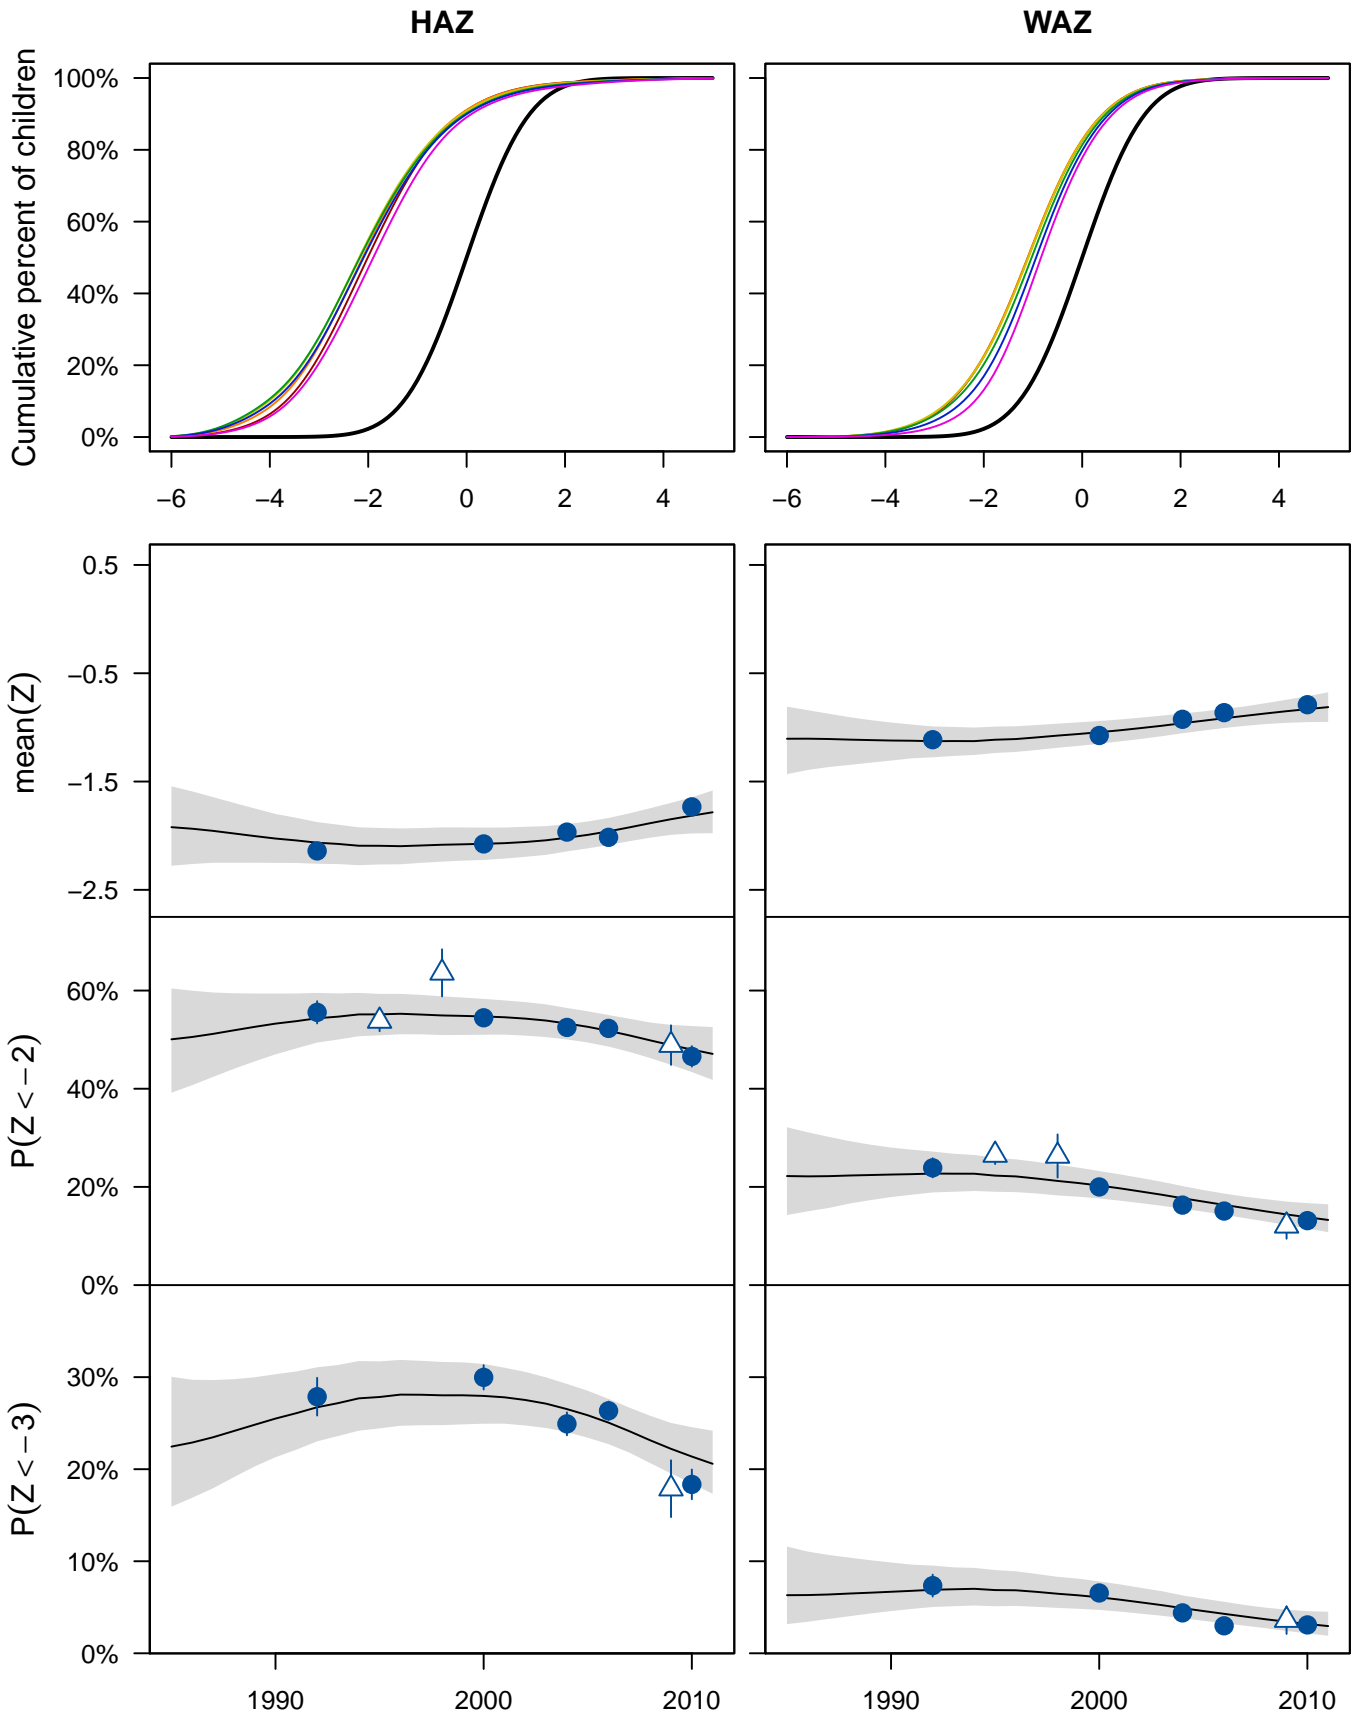

# Malaysia

East and Southeast Asia Region

HAZ

WAZ

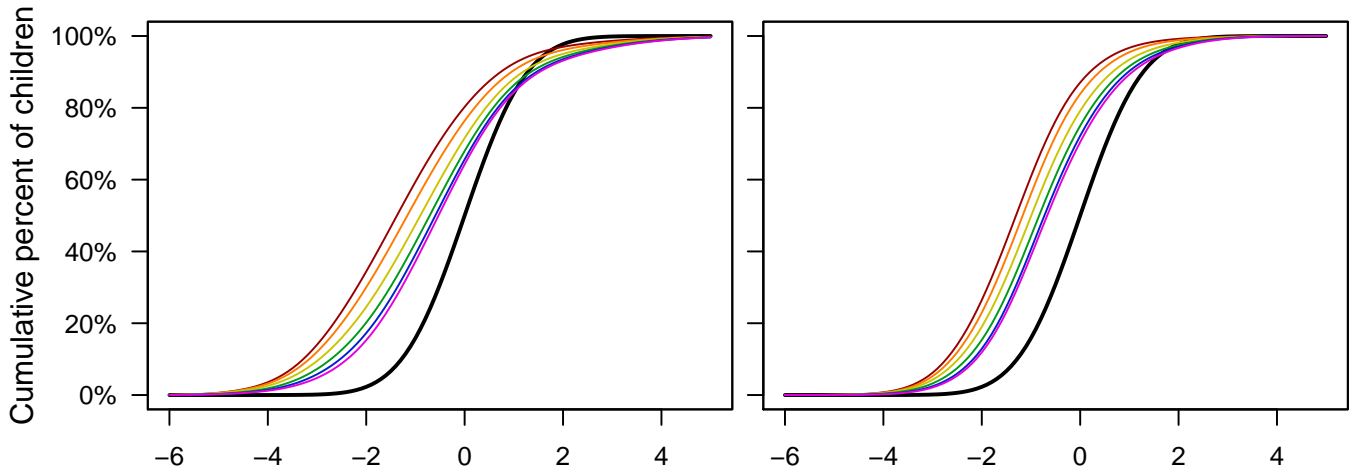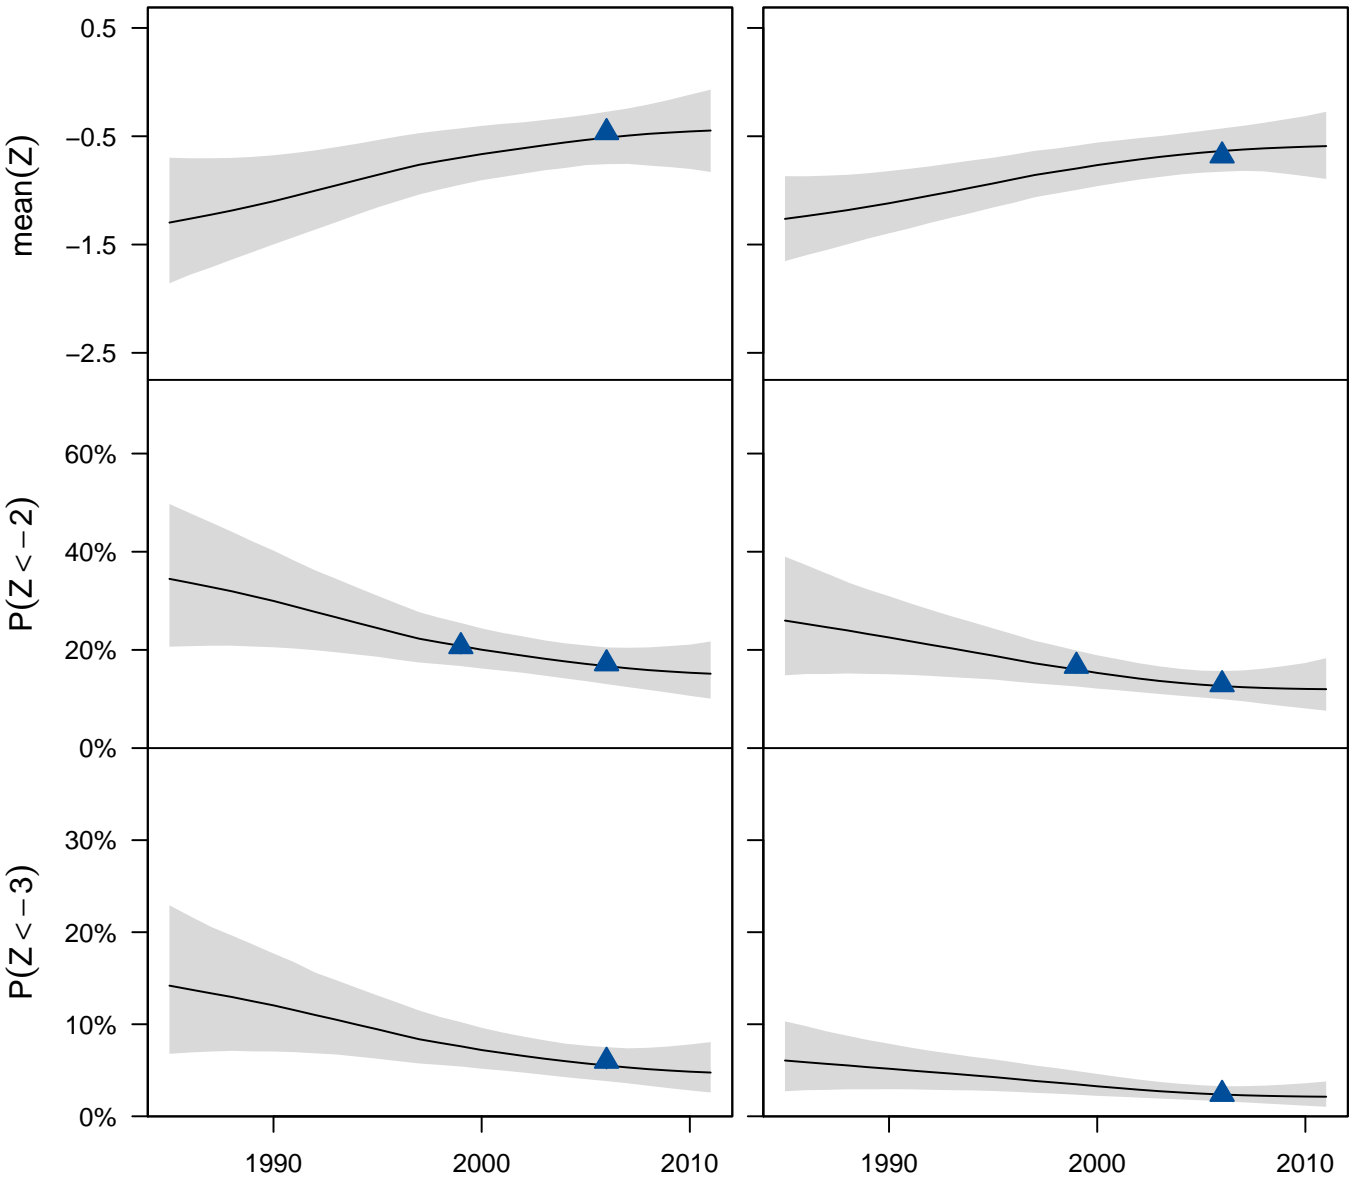



# Maldives

East and Southeast Asia Region

HAZ

WAZ

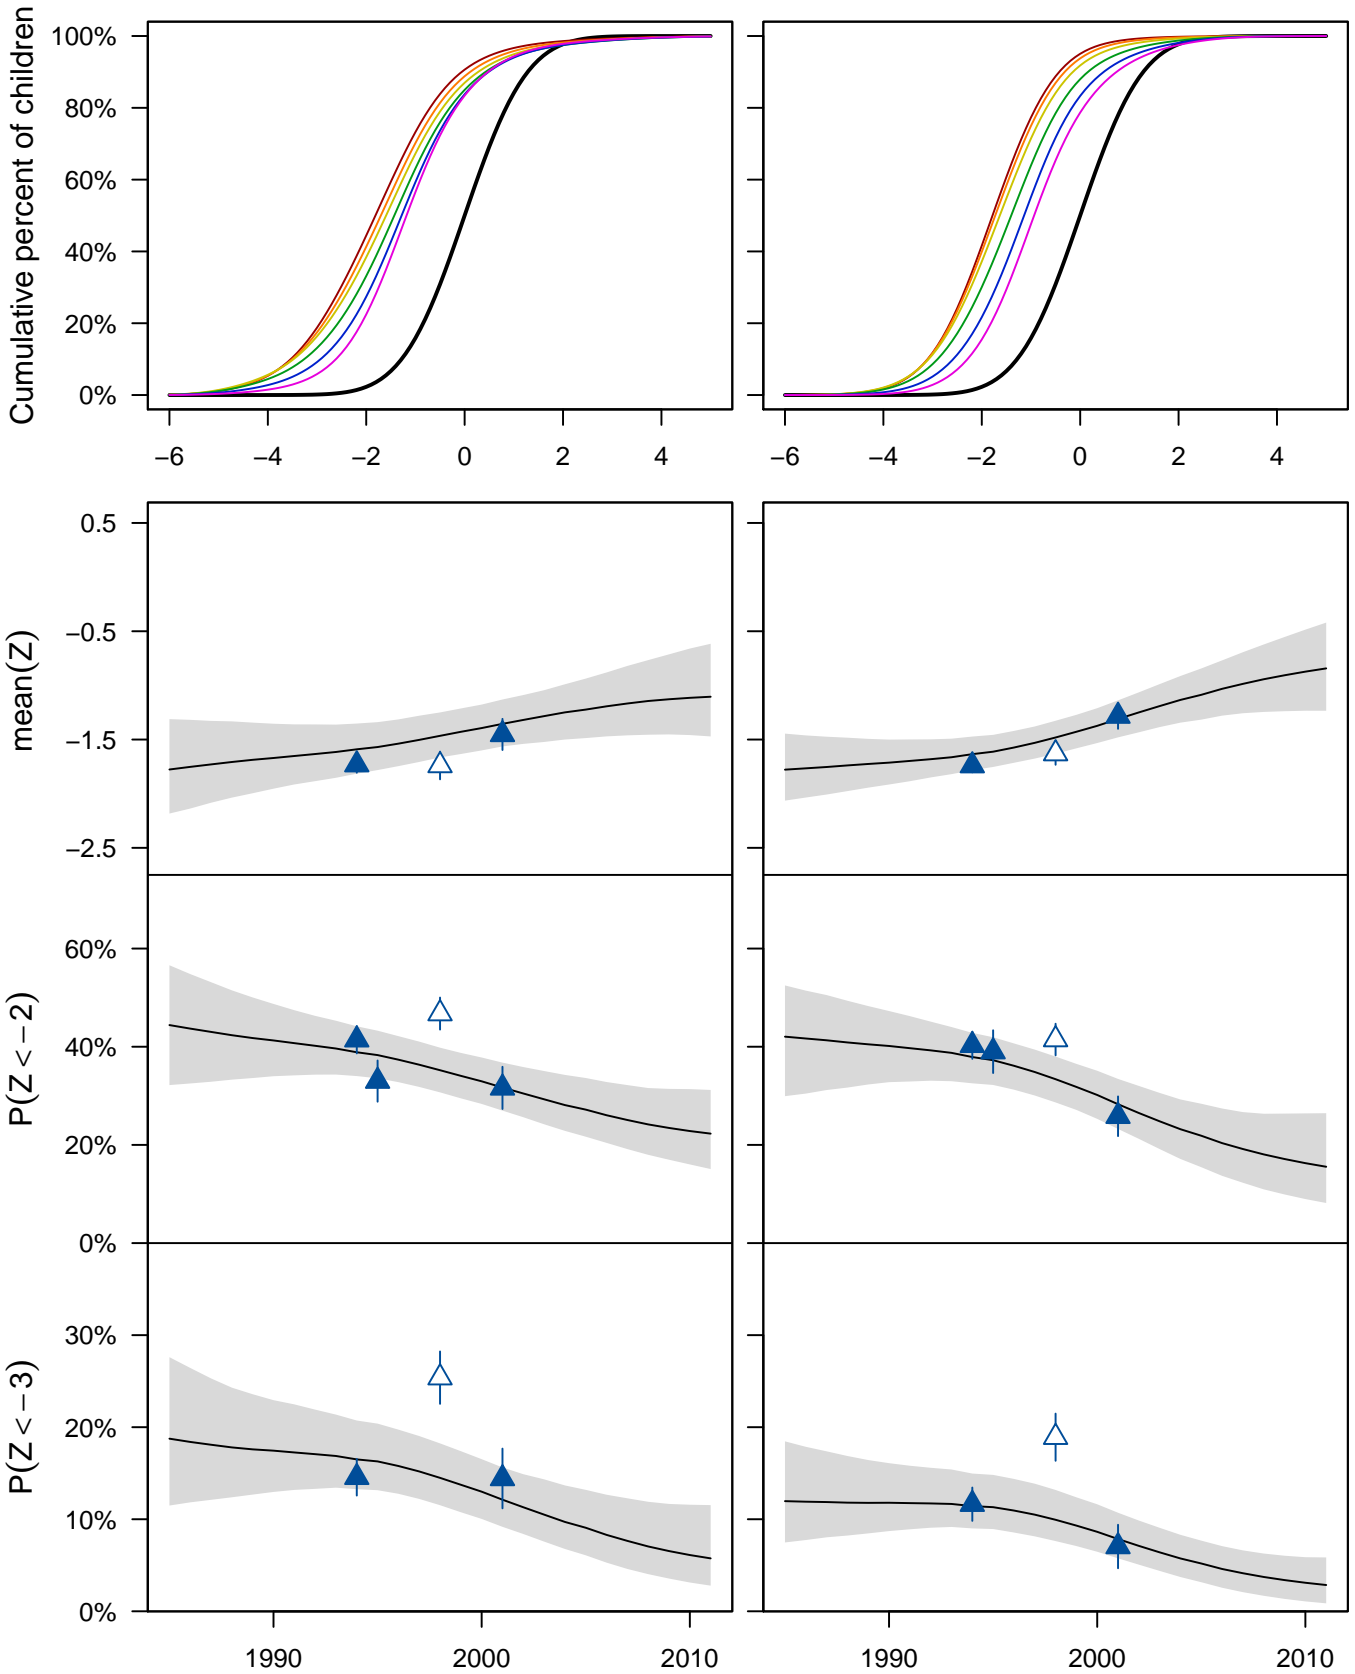

# Mali

Sub-Saharan Africa Region

### HAZ

### WAZ

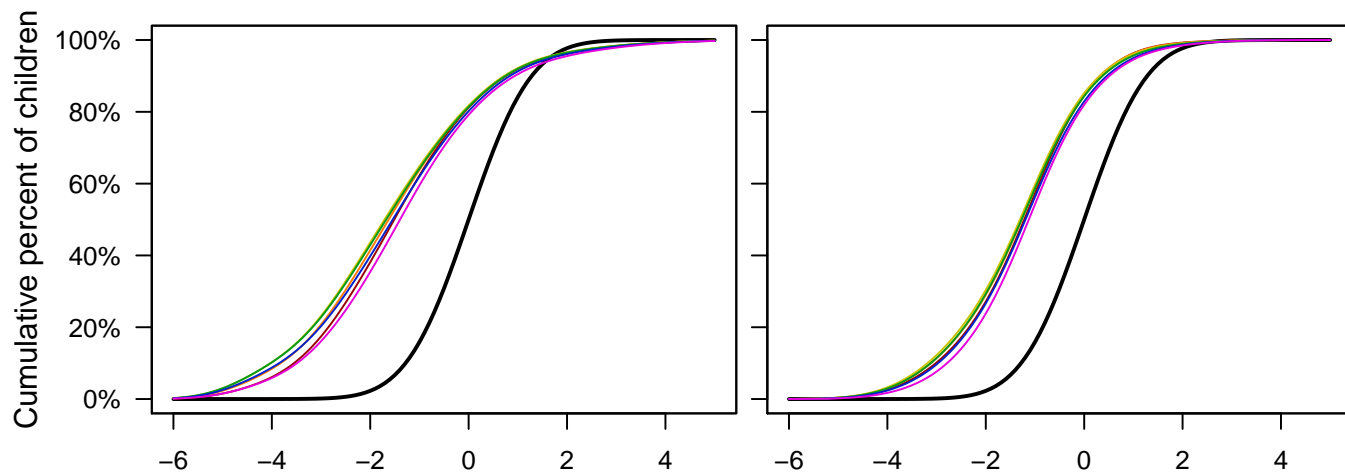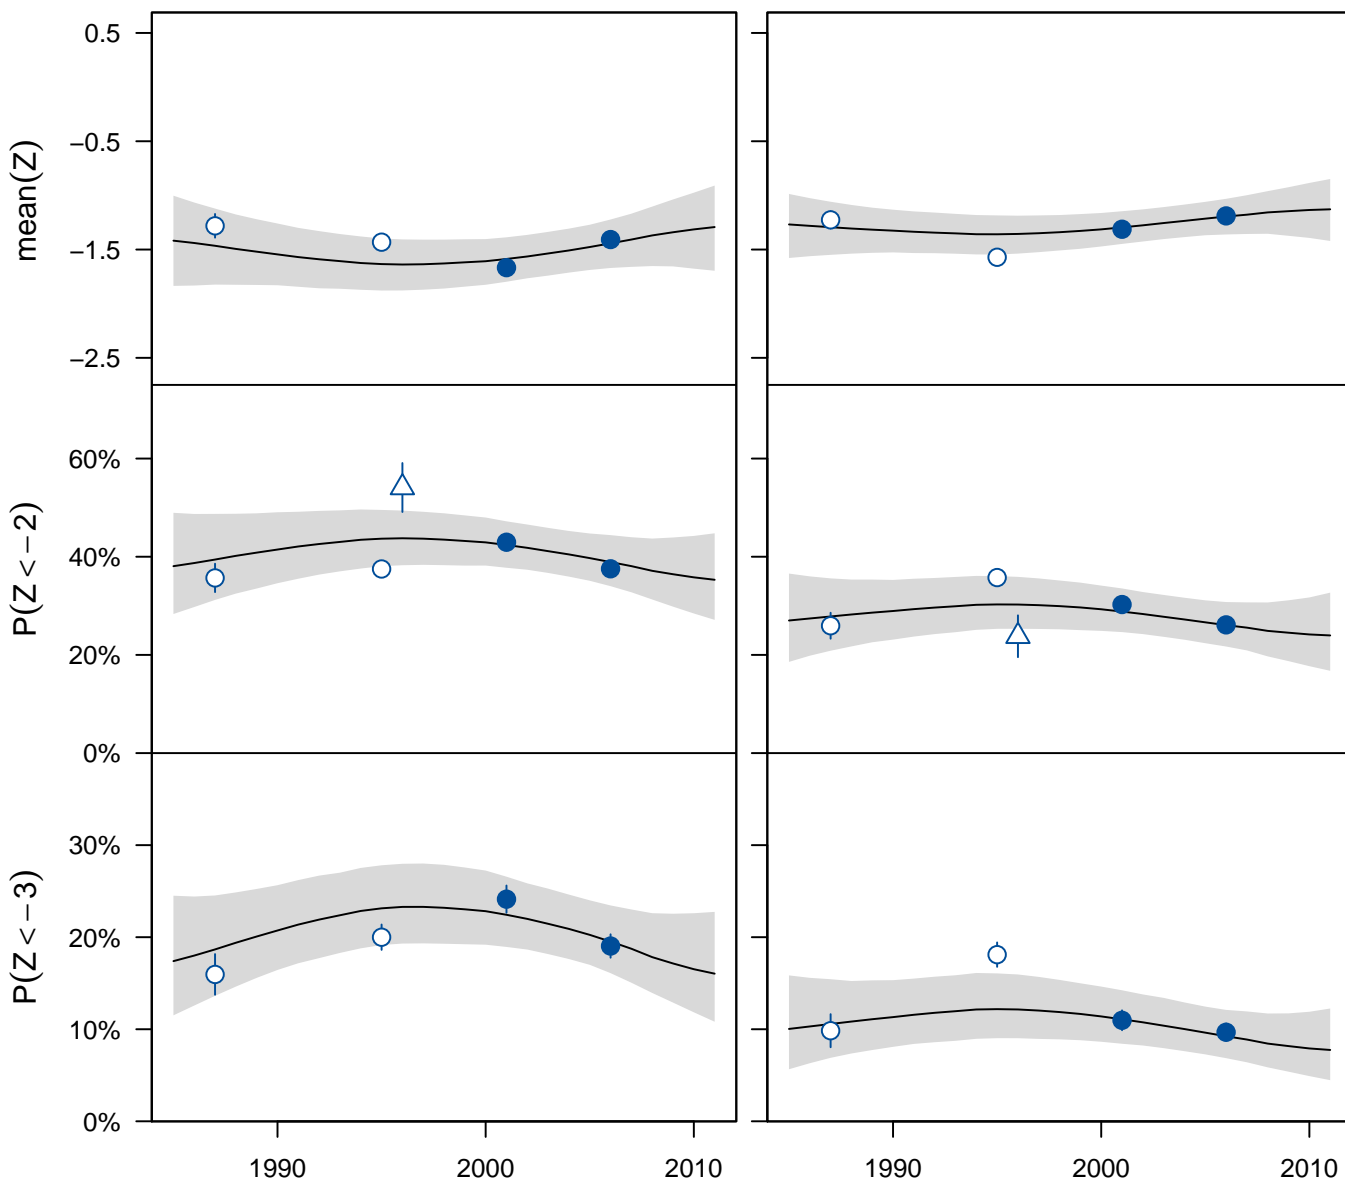

# Marshall Islands

Oceania Region

HAZ

WAZ

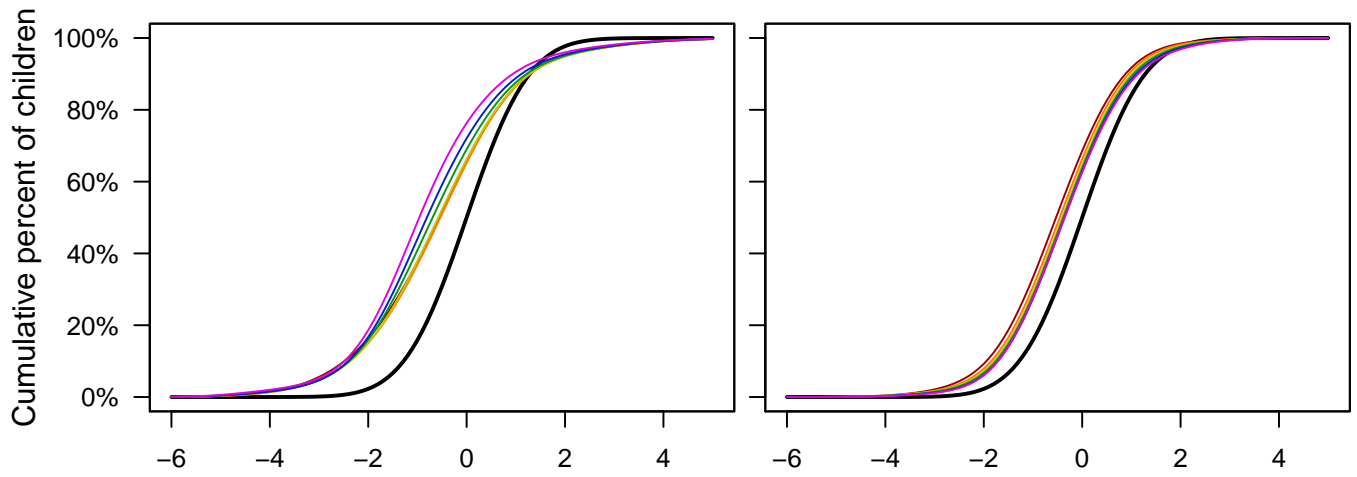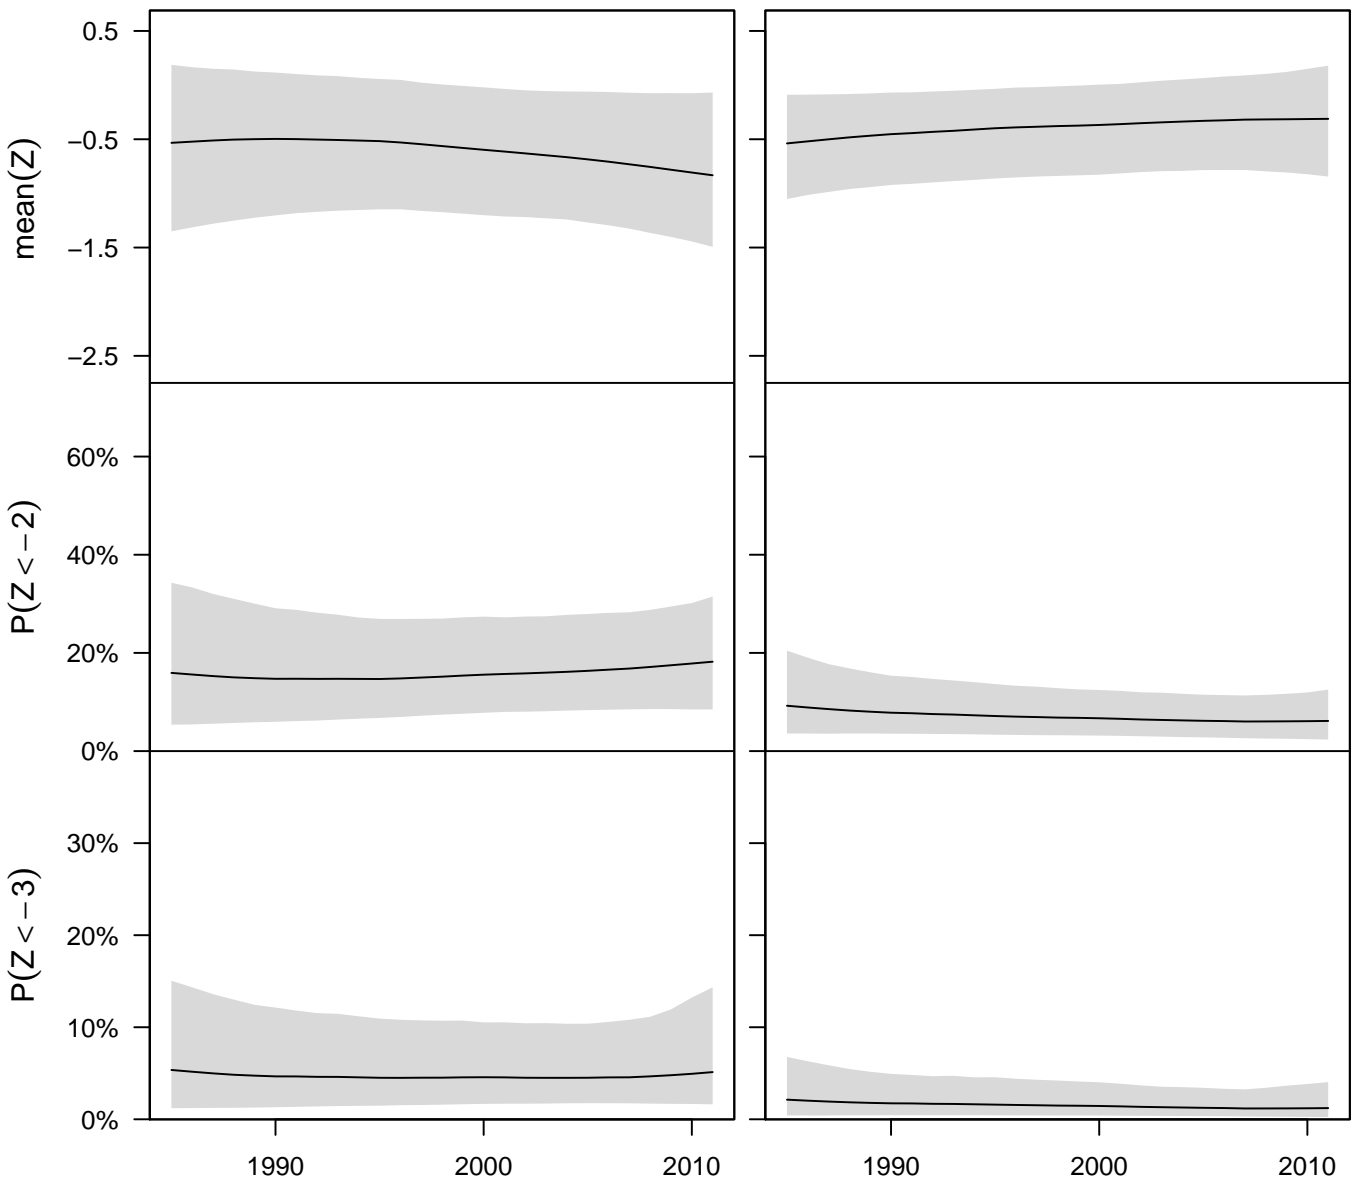

# Mauritania

## Sub-Saharan Africa Region

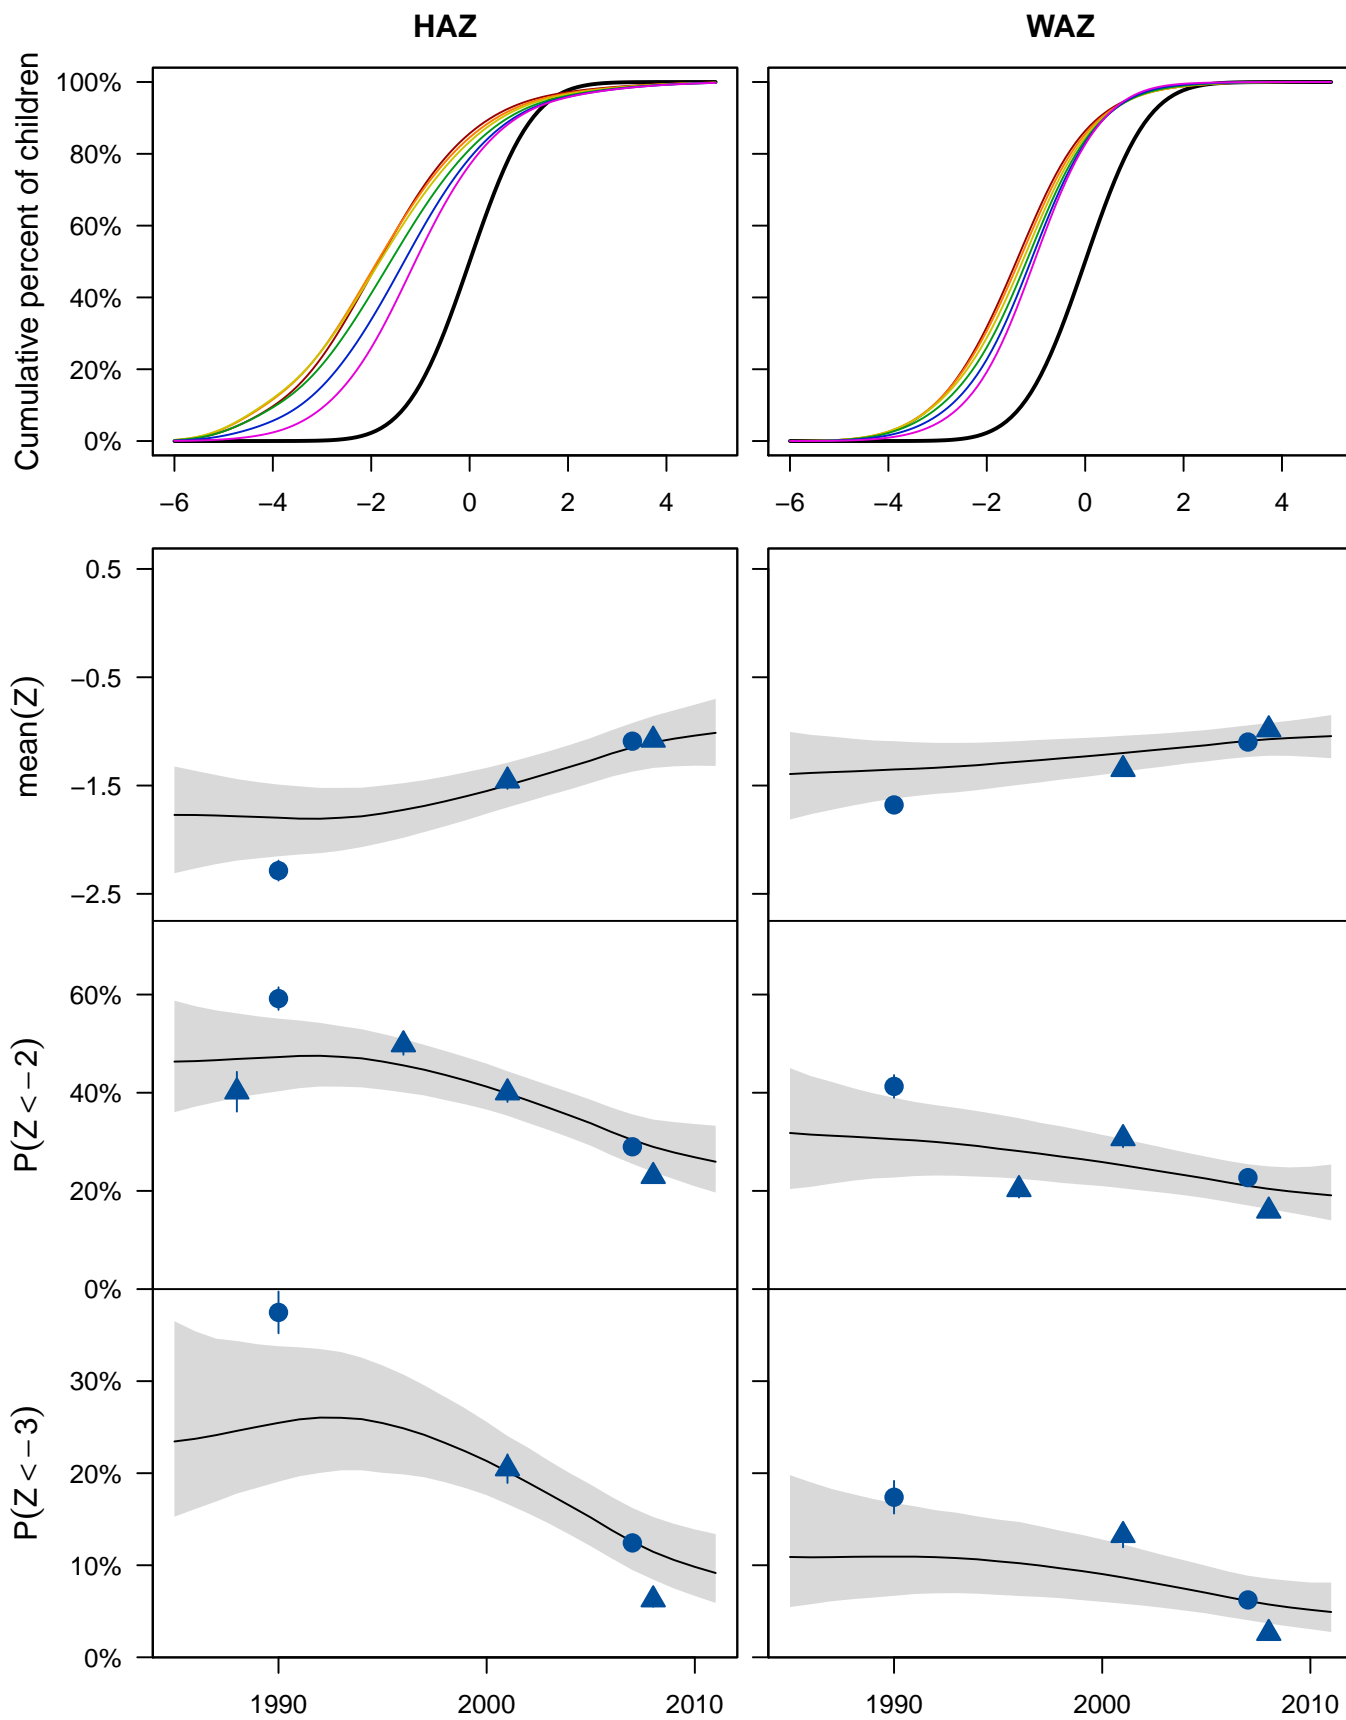

# Mauritius

Sub-Saharan Africa Region

HAZ

WAZ

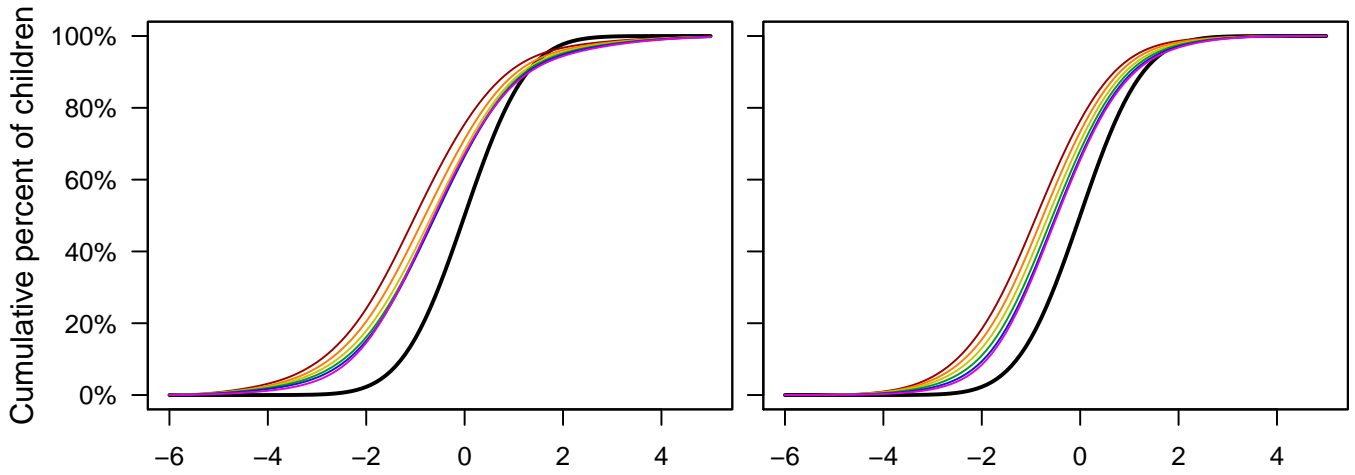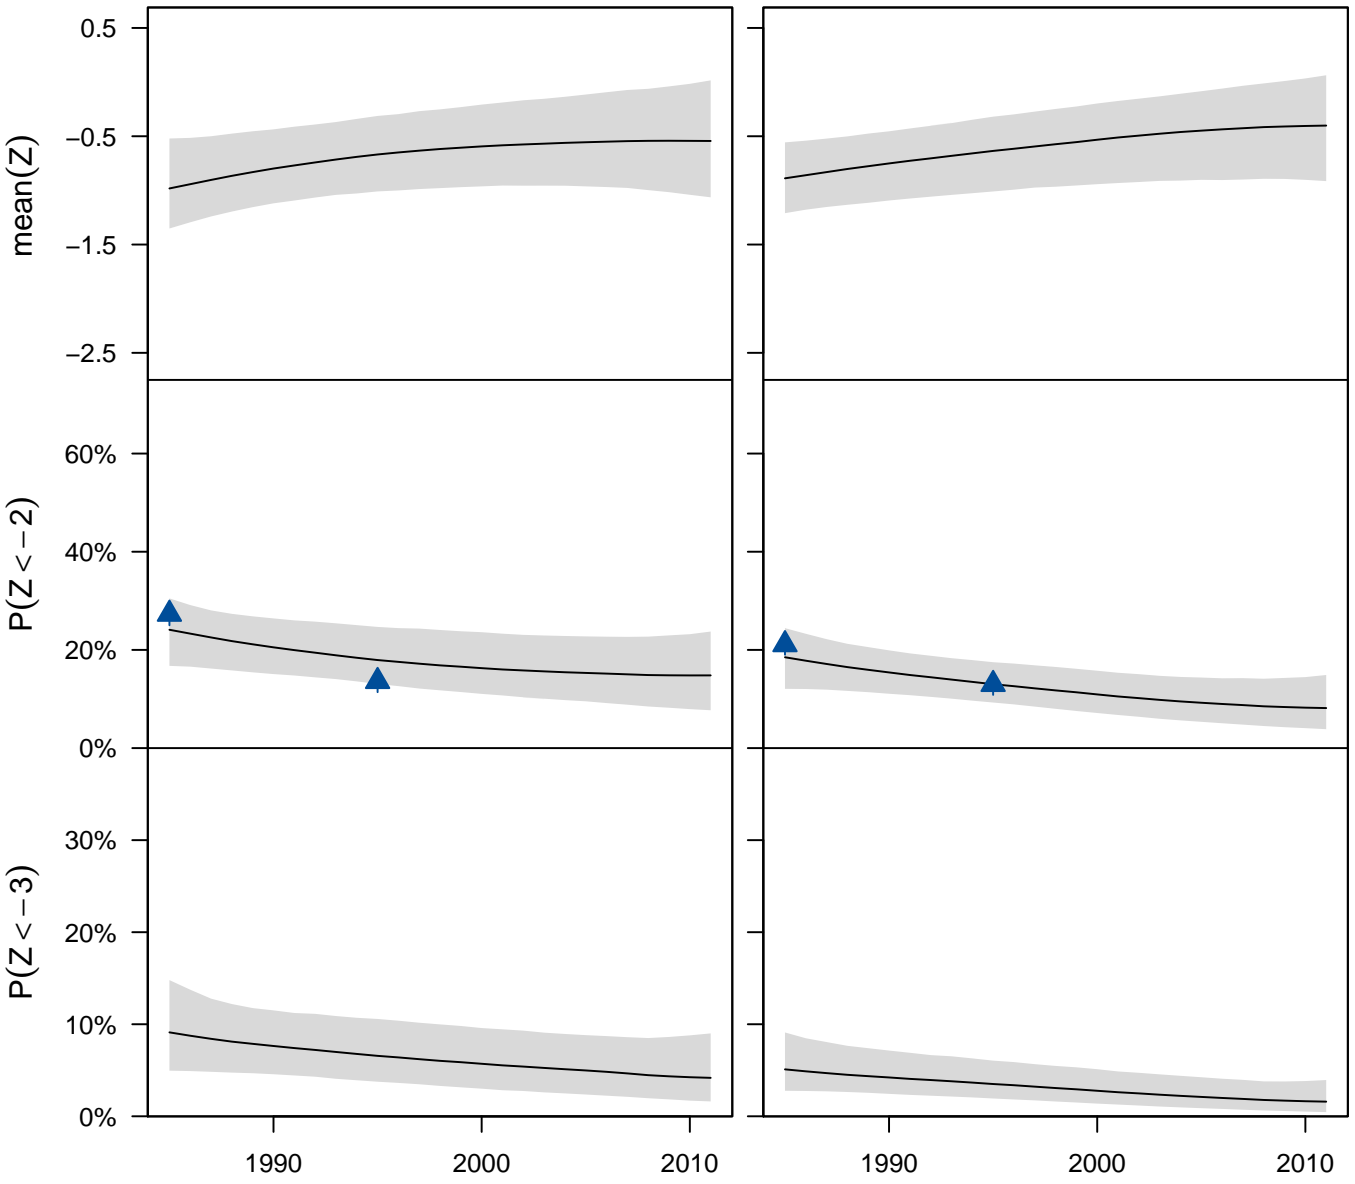

# Mexico

Andean and Central Latin America and Caribbean Region

HAZ

WAZ

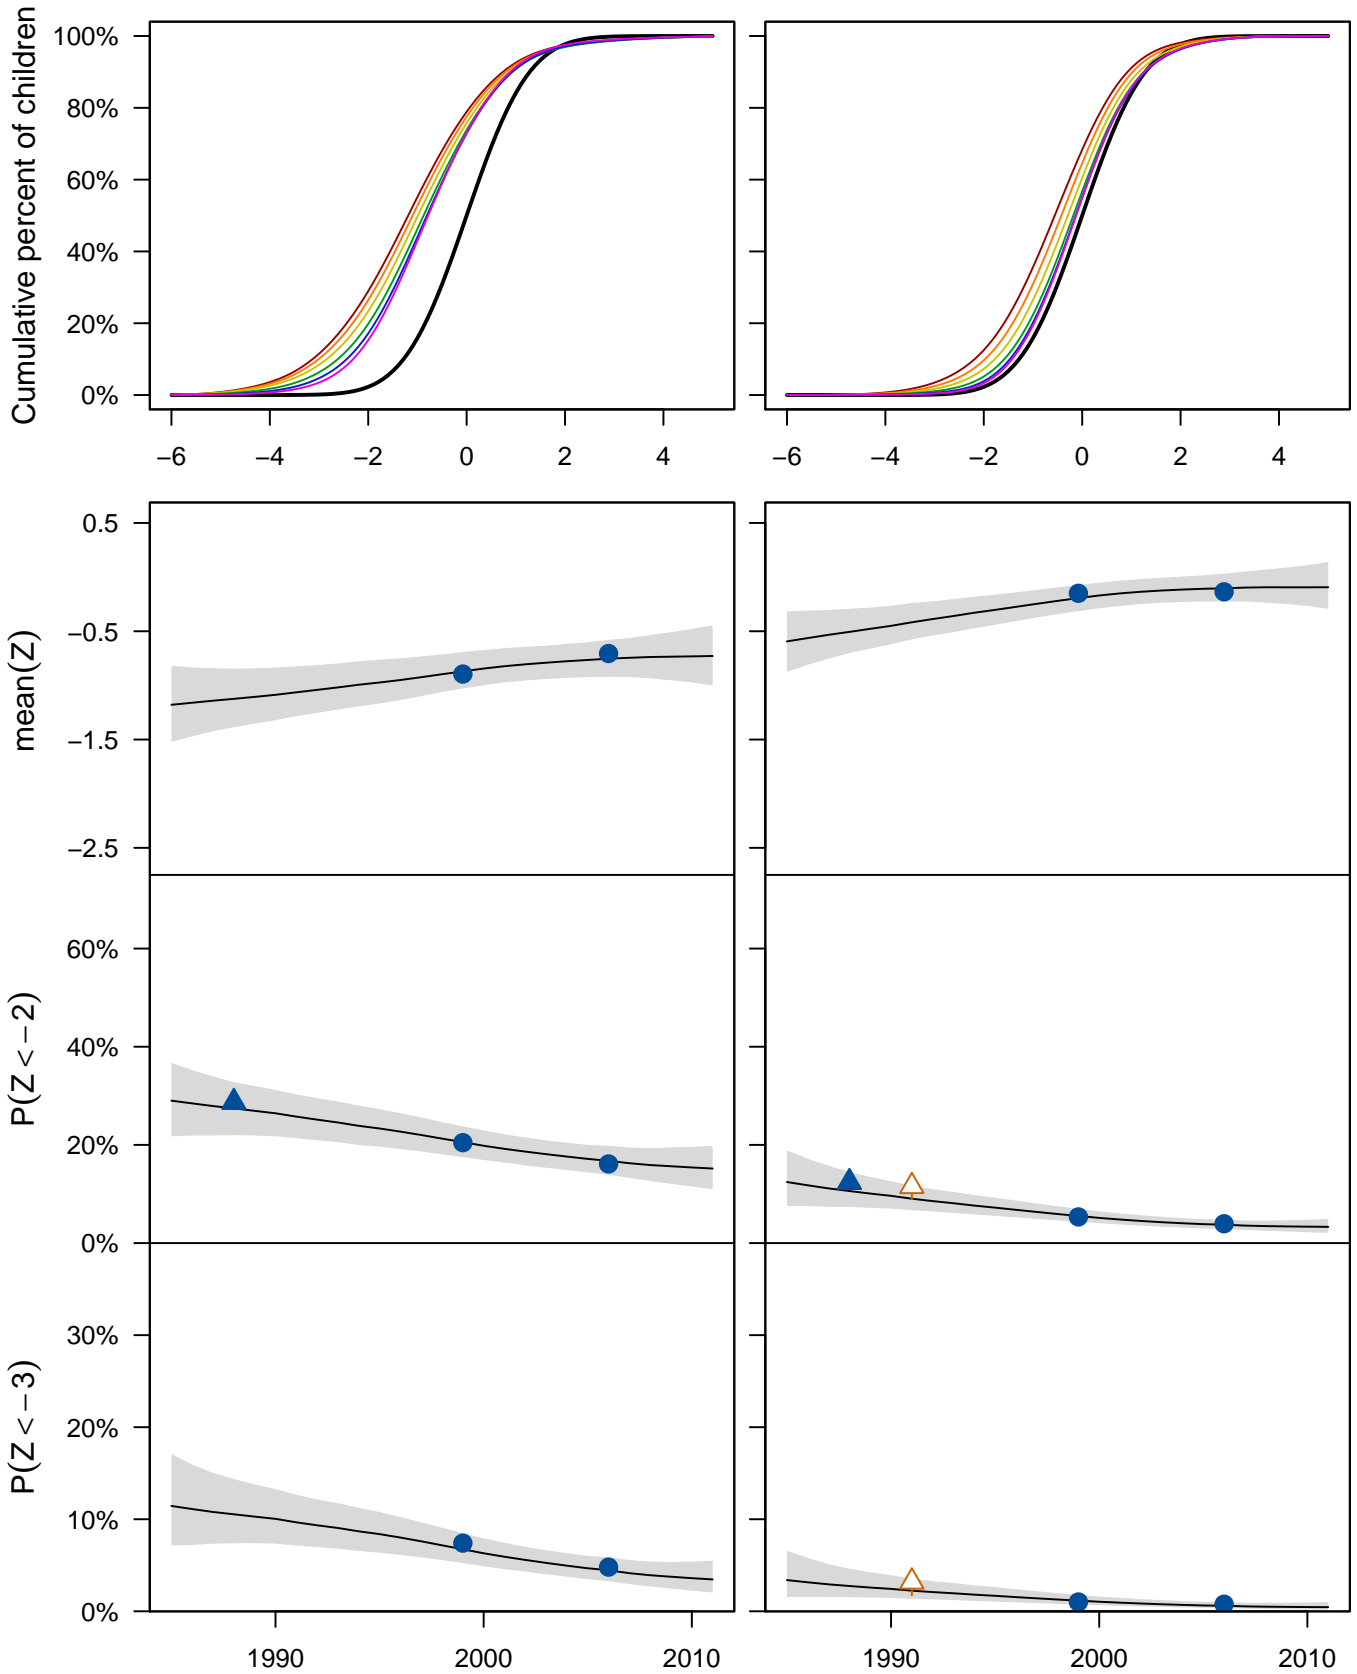

# Micronesia (Federated States of)

Oceania Region

HAZ

WAZ

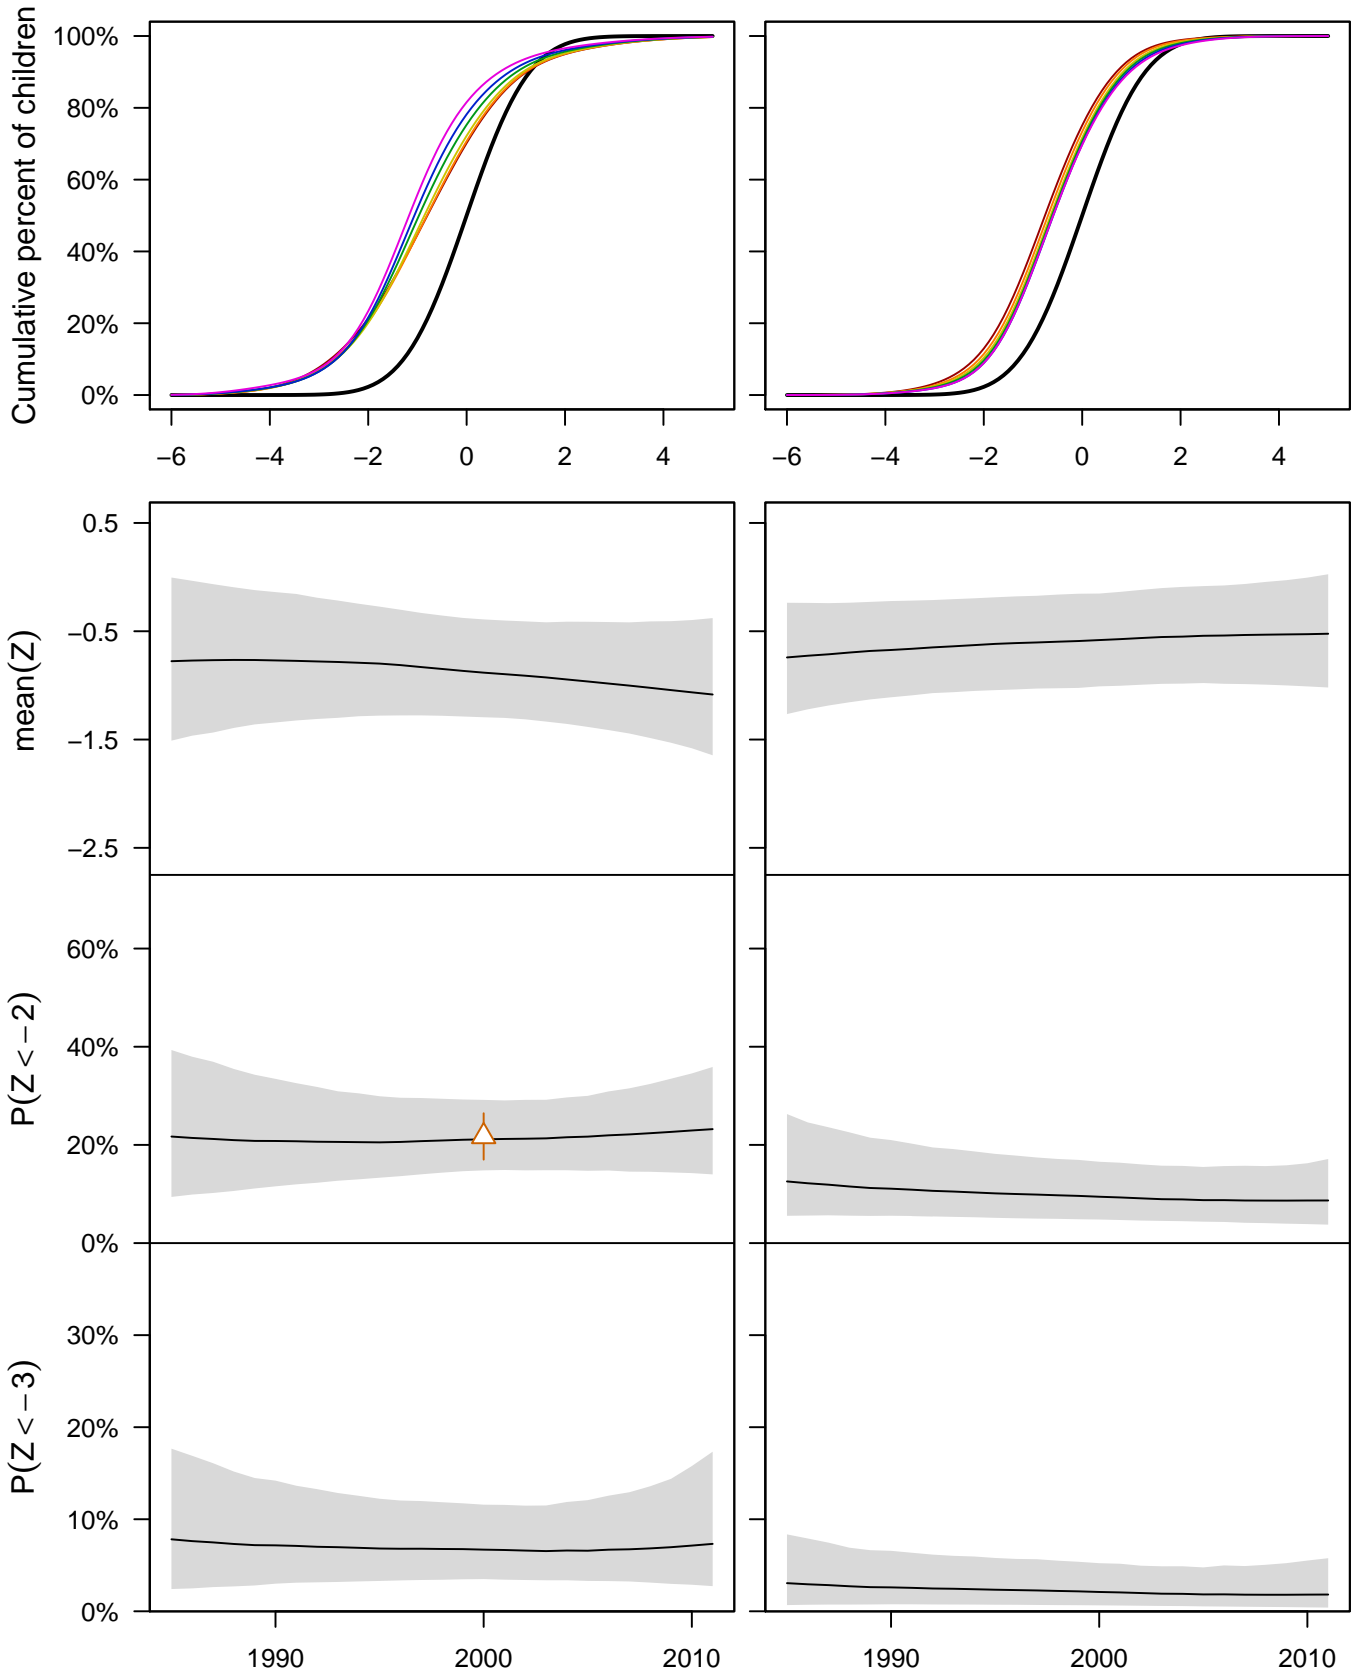

# Mongolia

Central Asia, Middle East, and North Africa Region

HAZ

WAZ

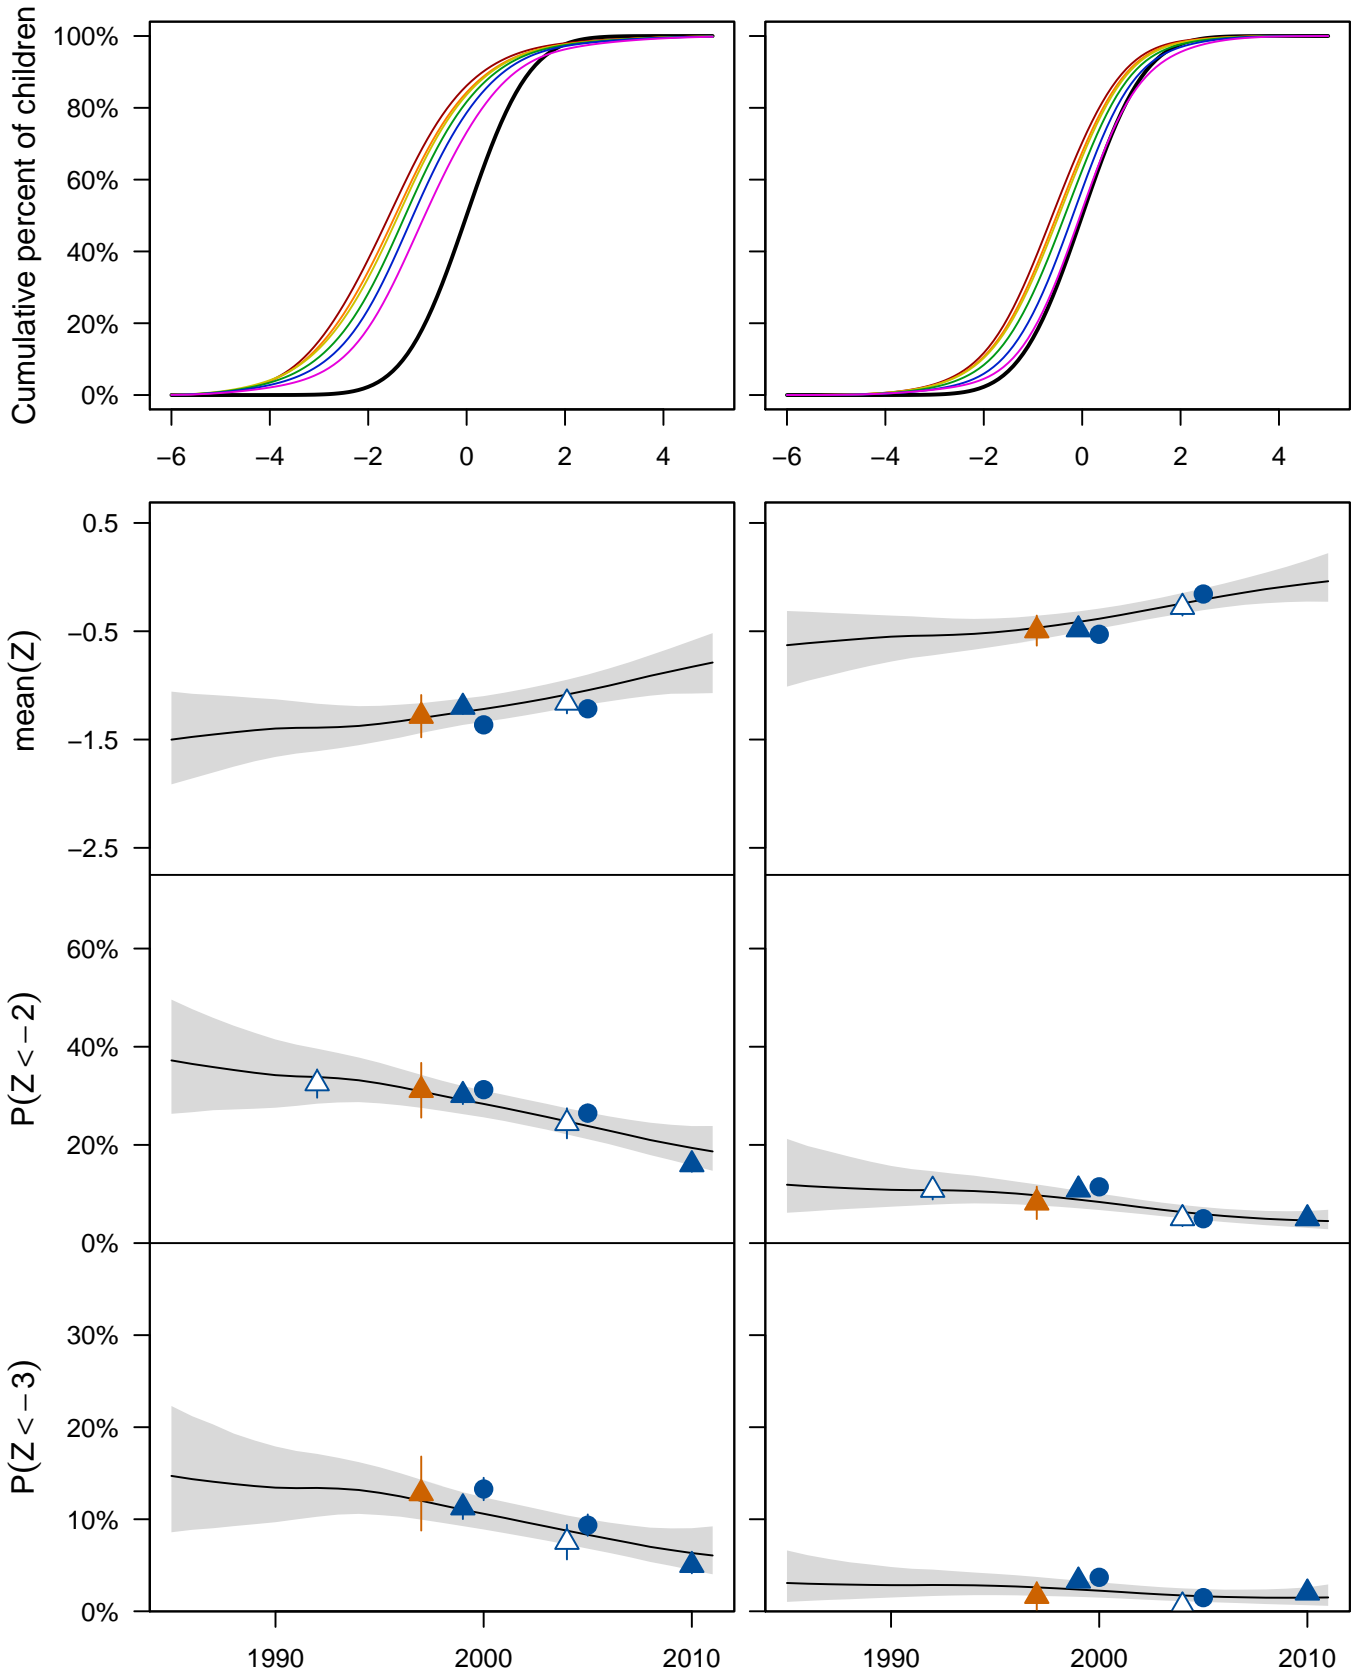



# Morocco

Central Asia, Middle East, and North Africa Region

HAZ

WAZ

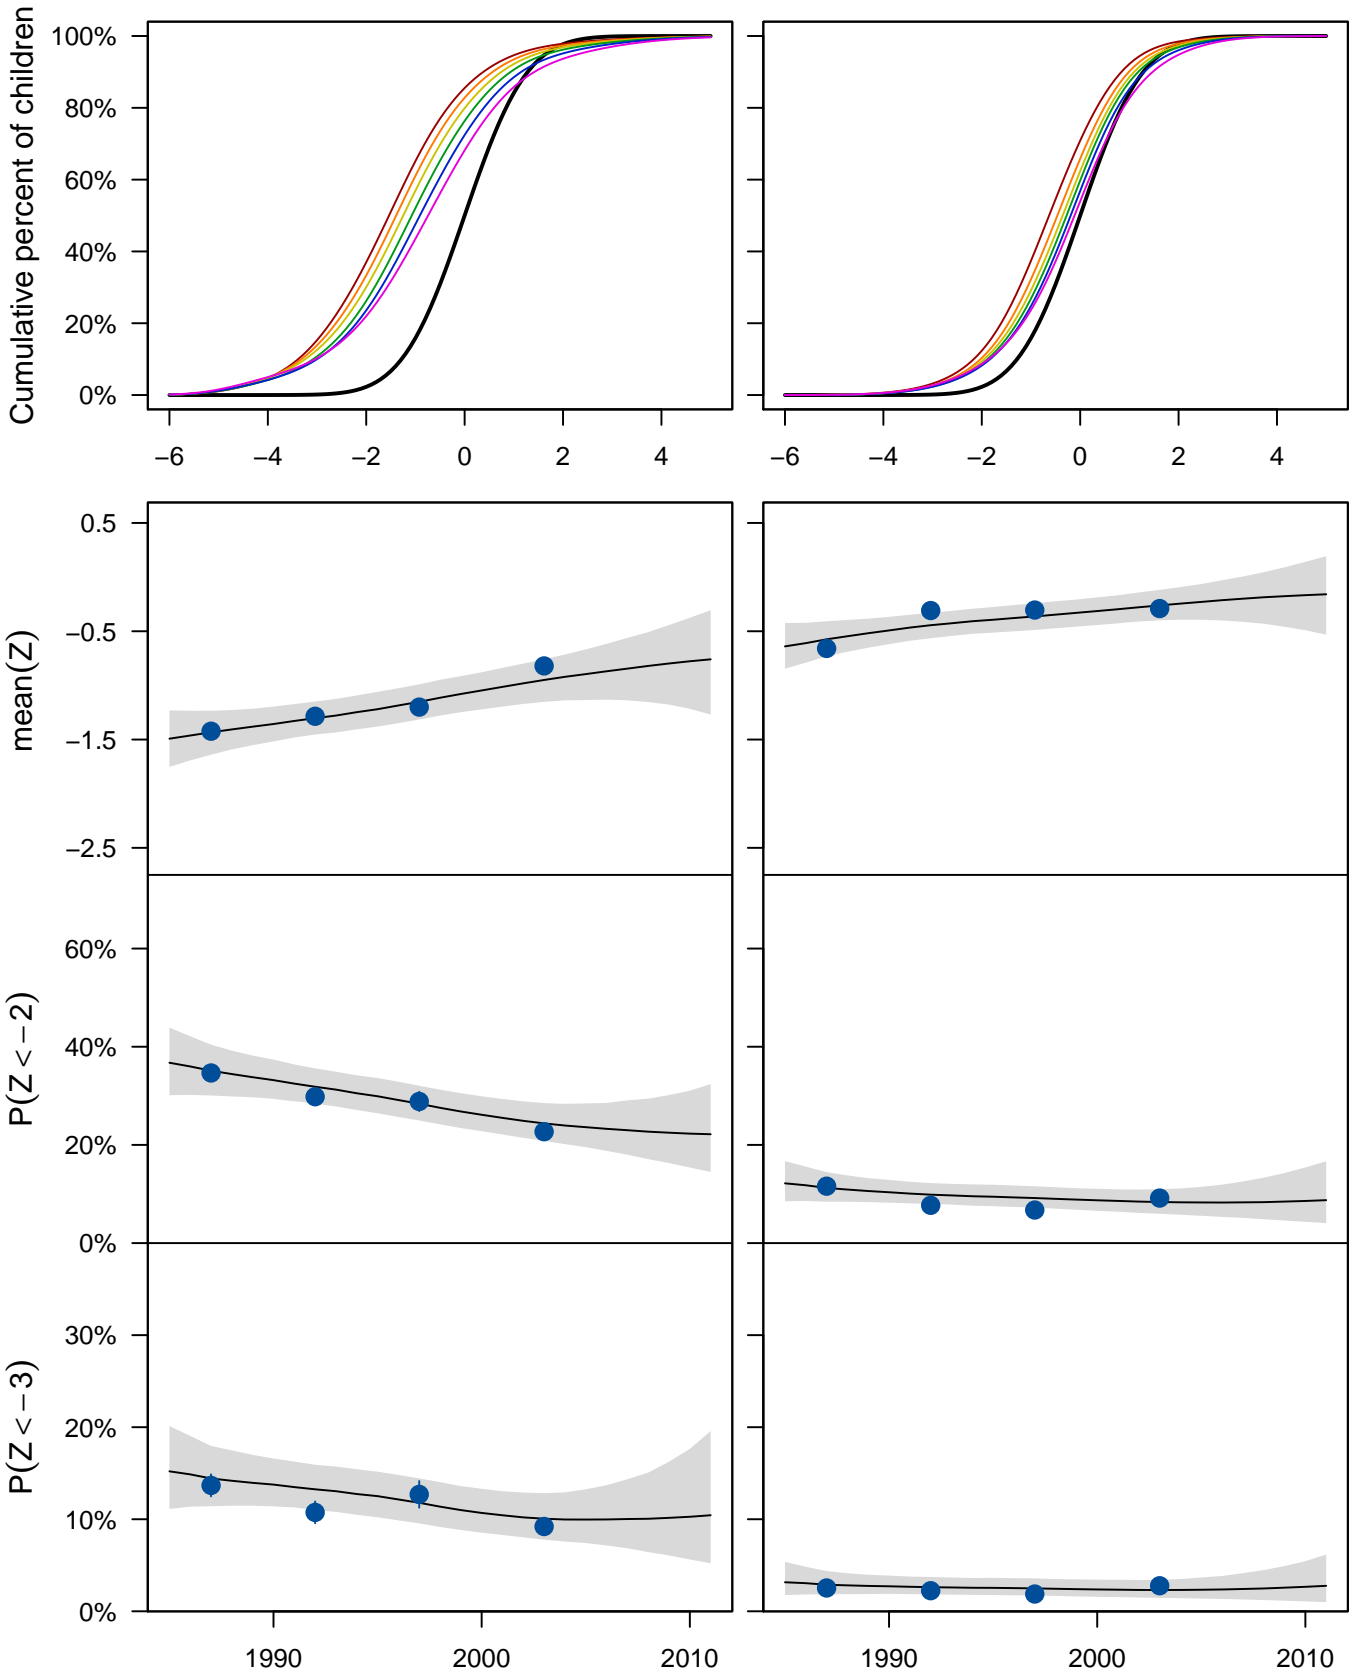

# Mozambique

## Sub-Saharan Africa Region

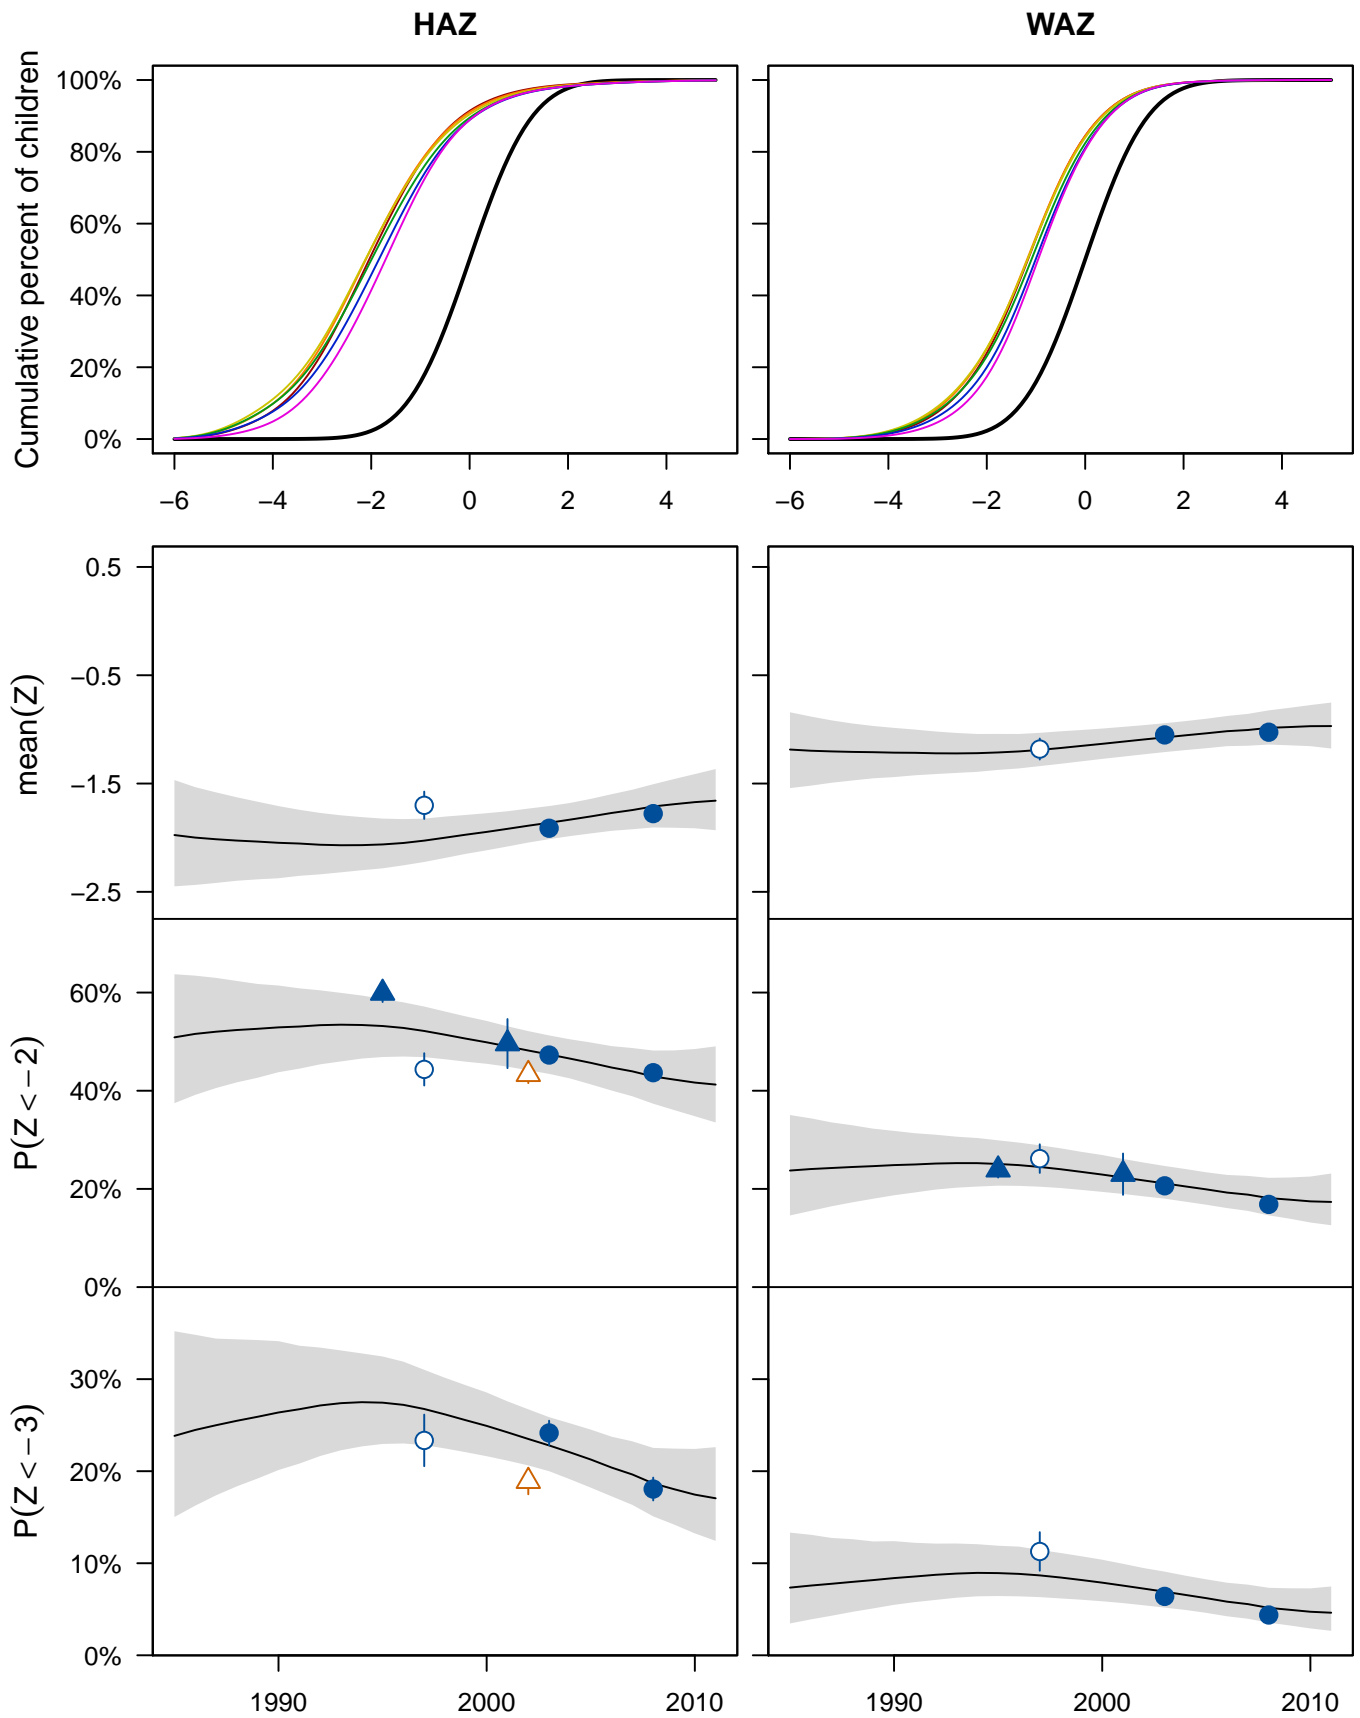

# Myanmar

East and Southeast Asia Region

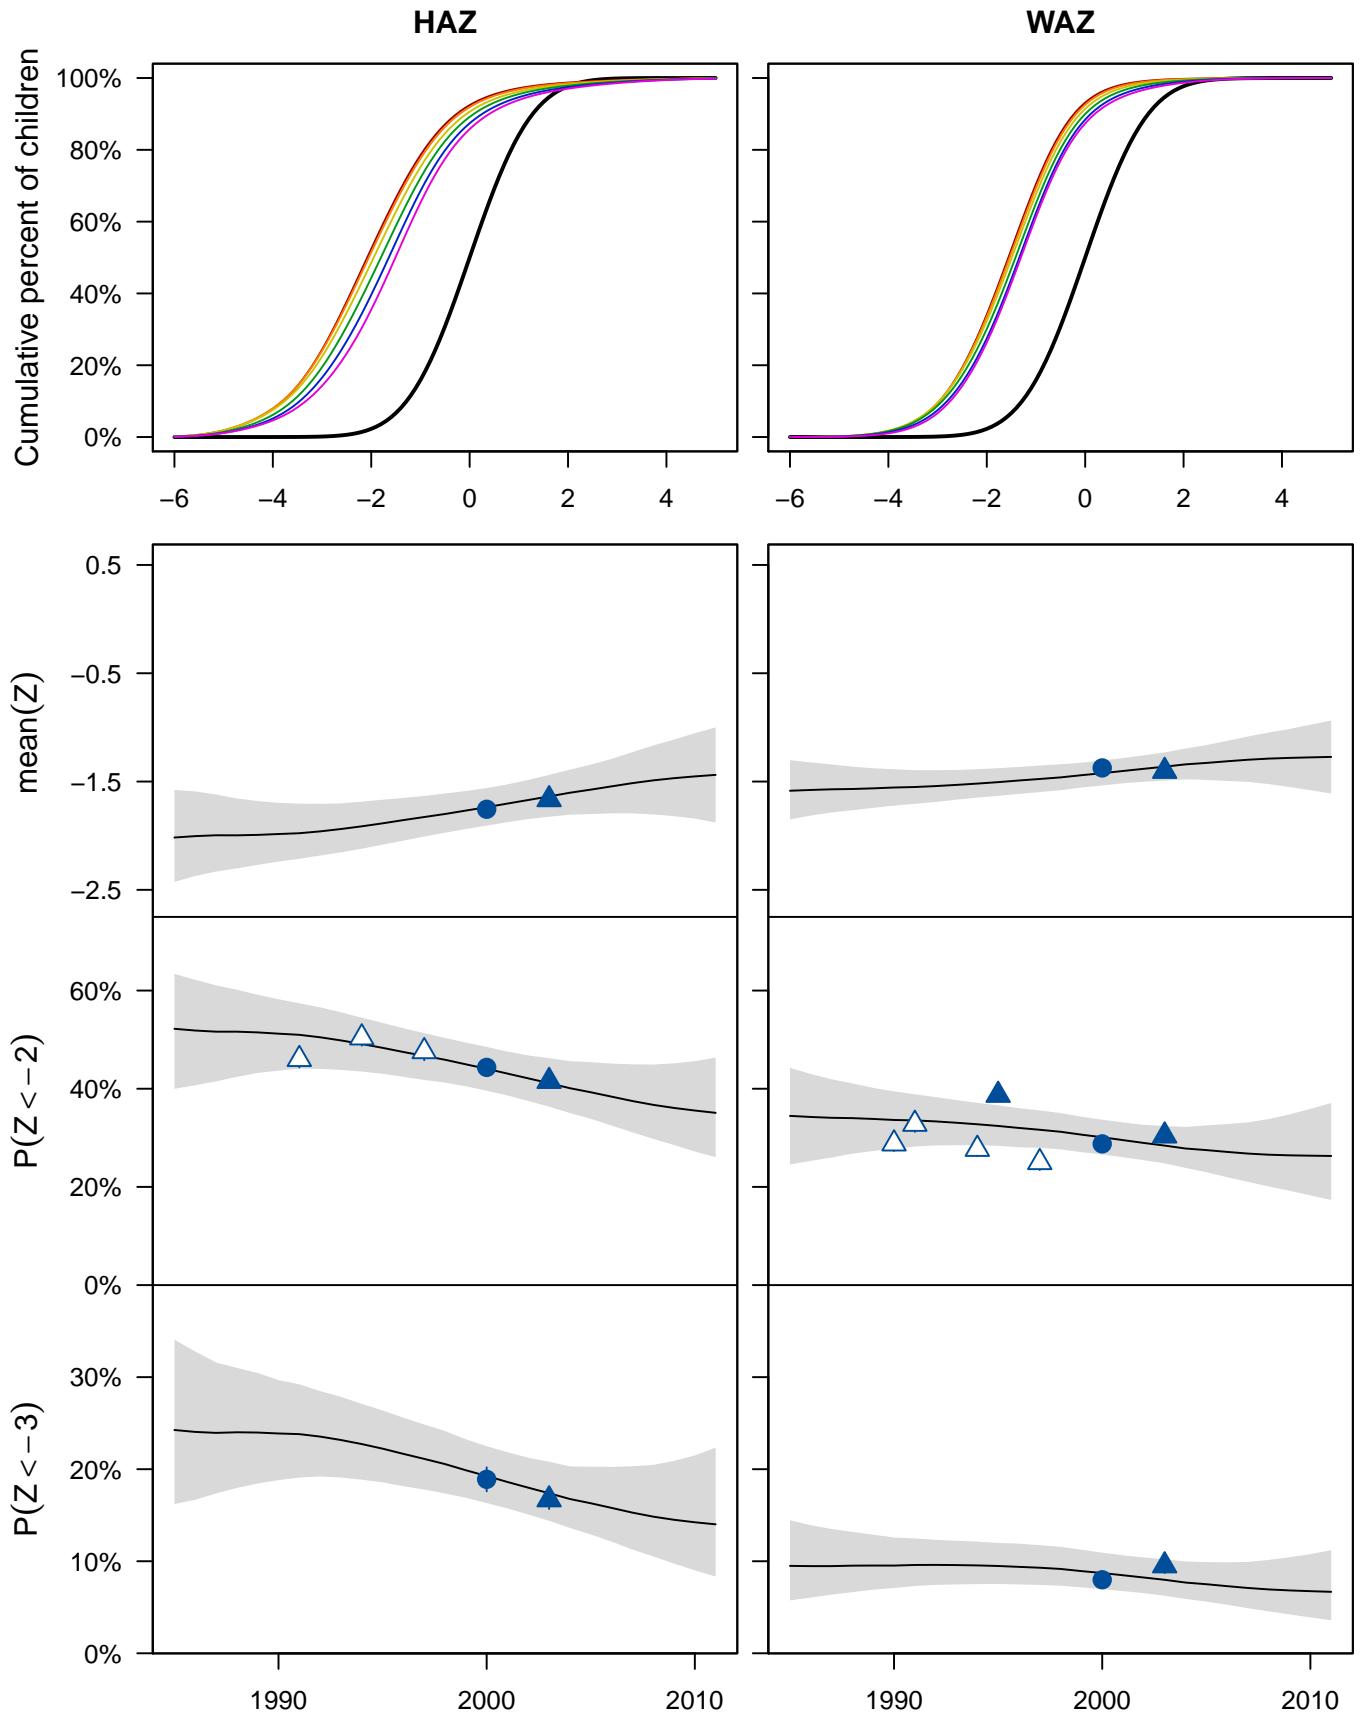

# Namibia

## Sub-Saharan Africa Region

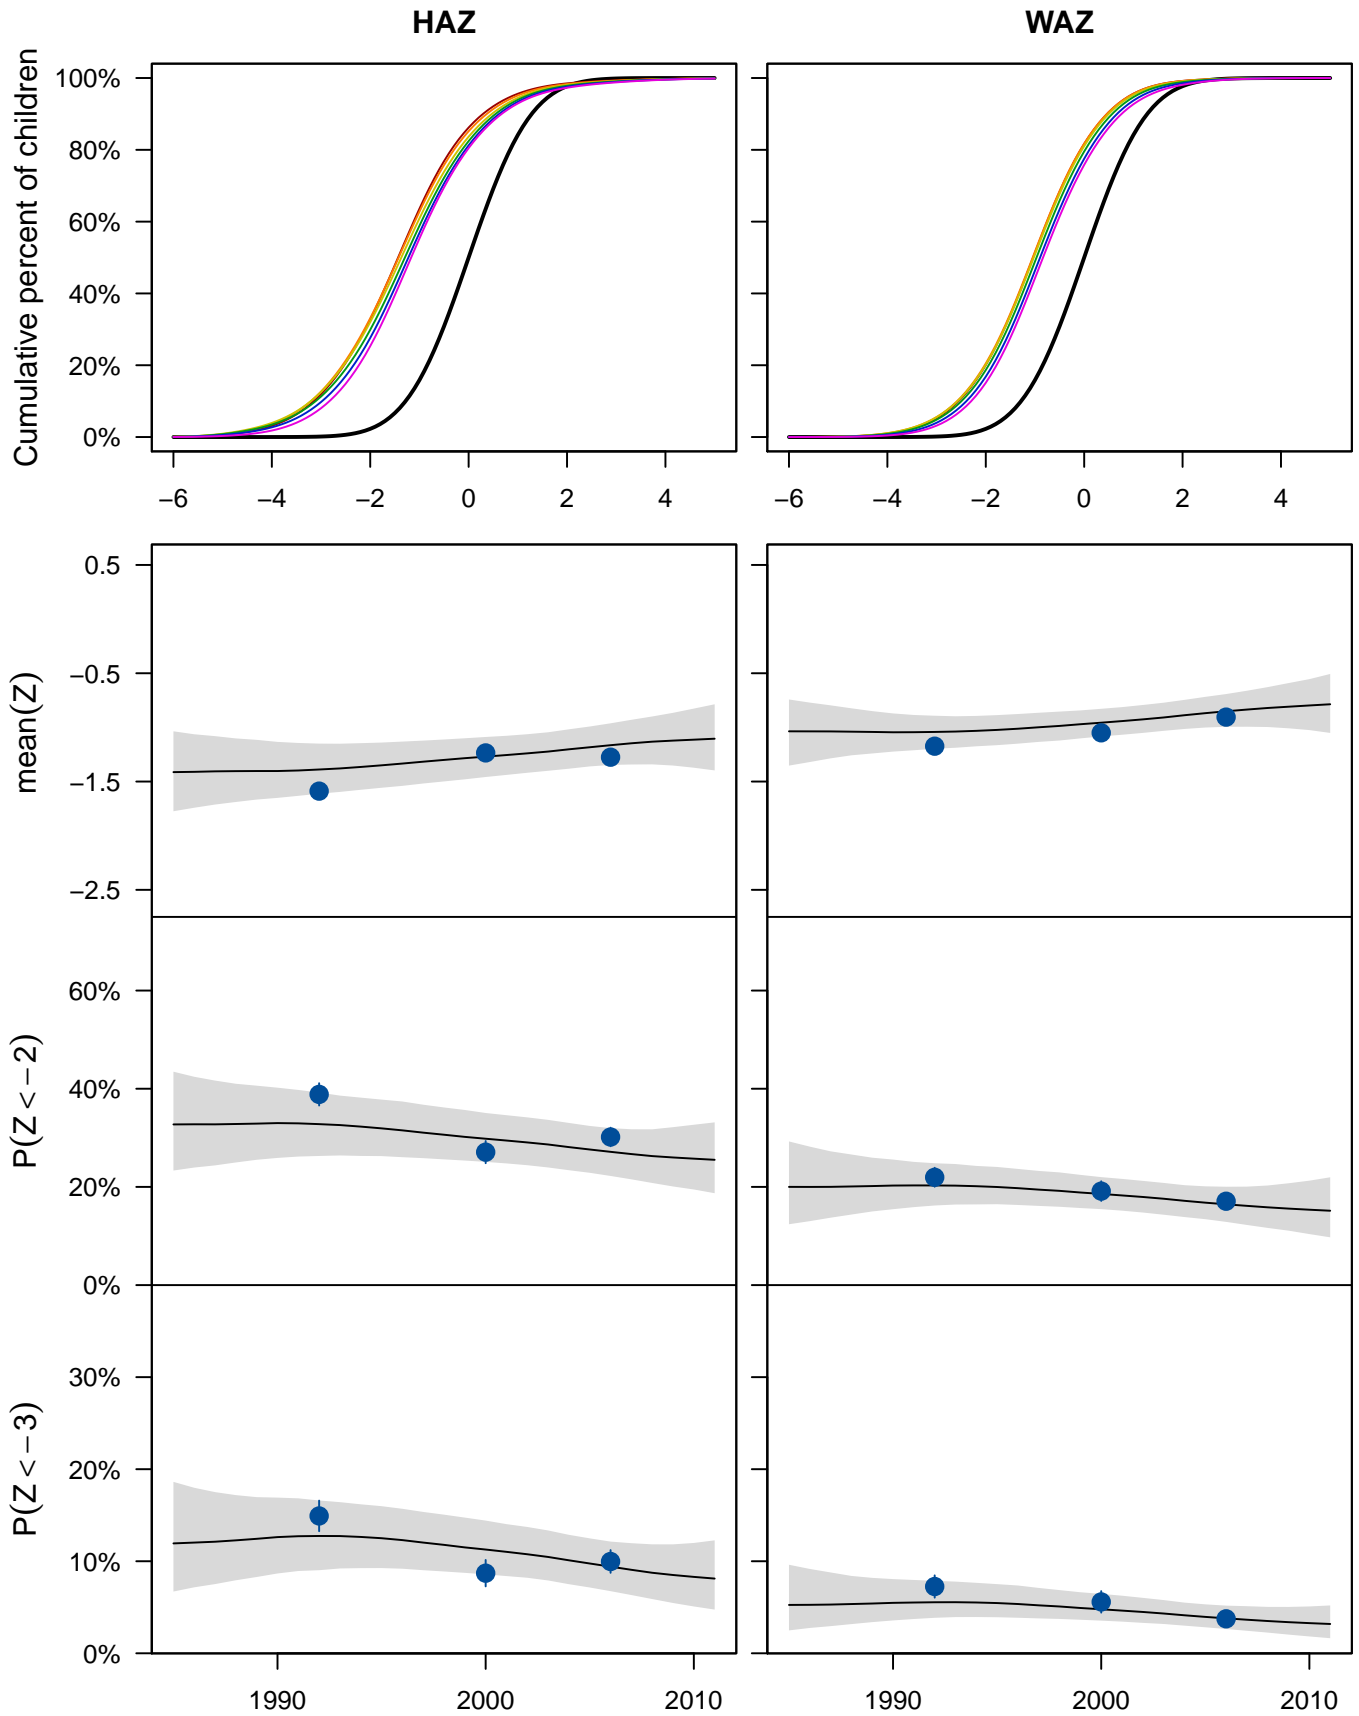

# Nepal

South Asia Region

## HAZ

## WAZ

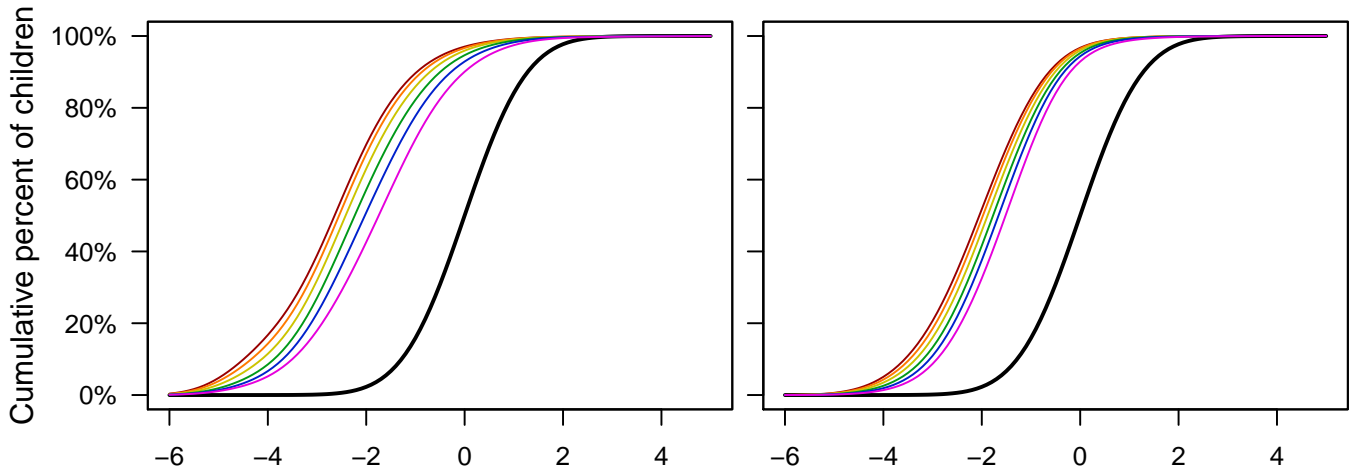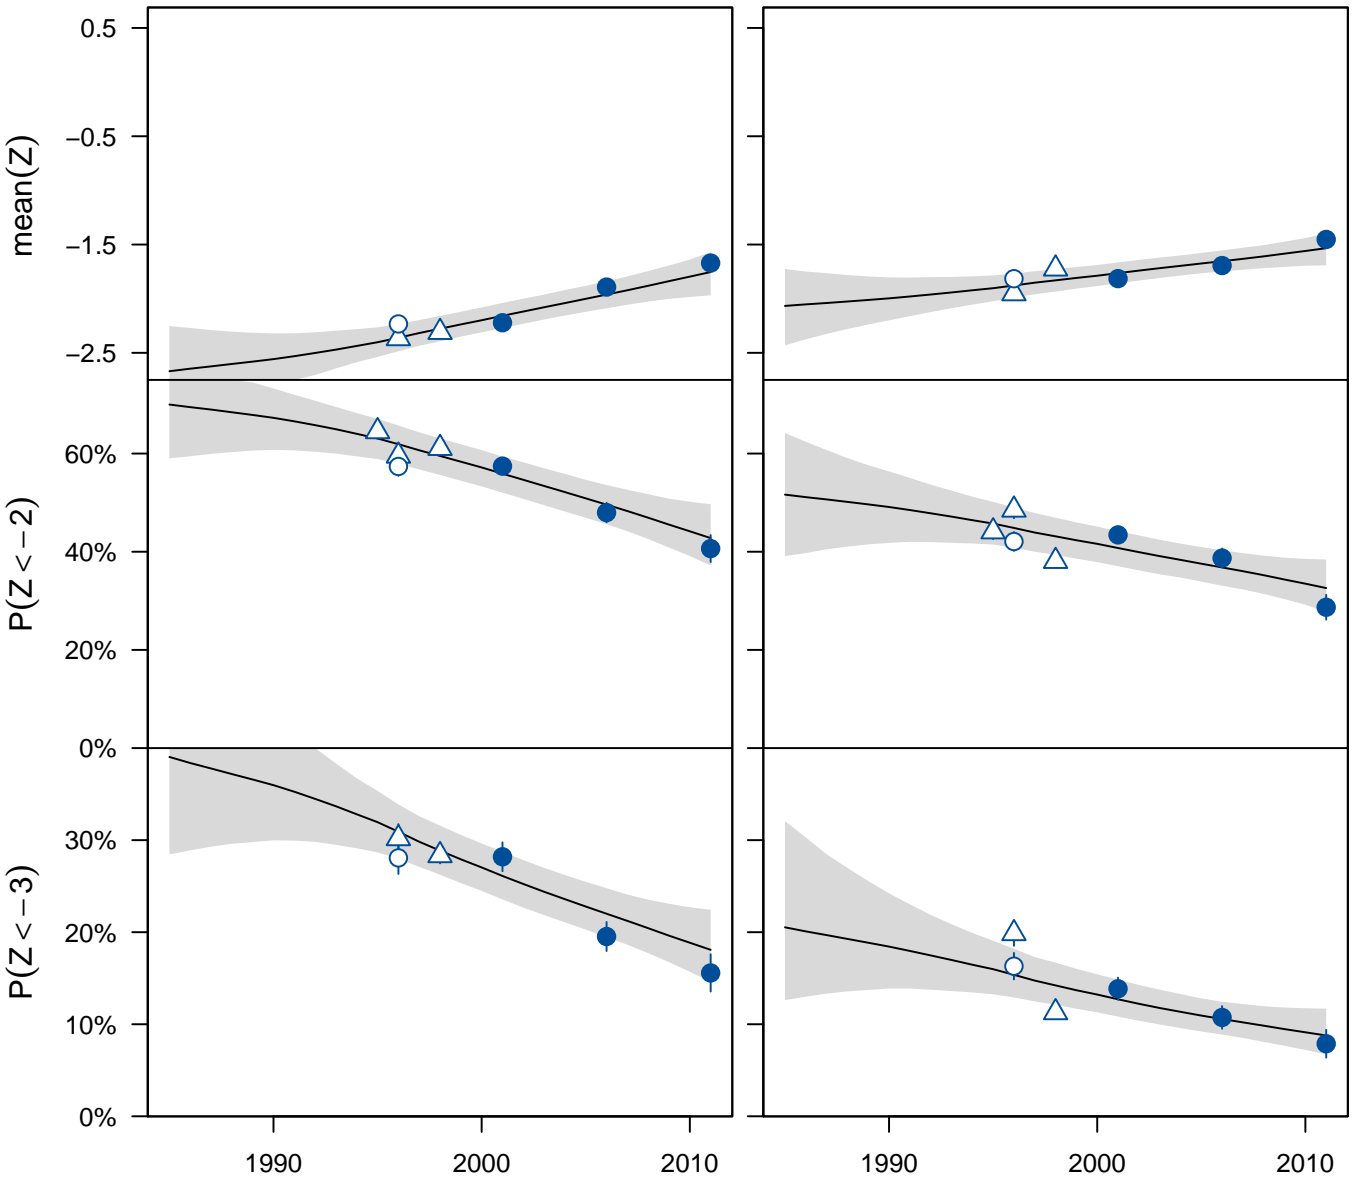

# Nicaragua

Andean and Central Latin America and Caribbean Region

HAZ

WAZ

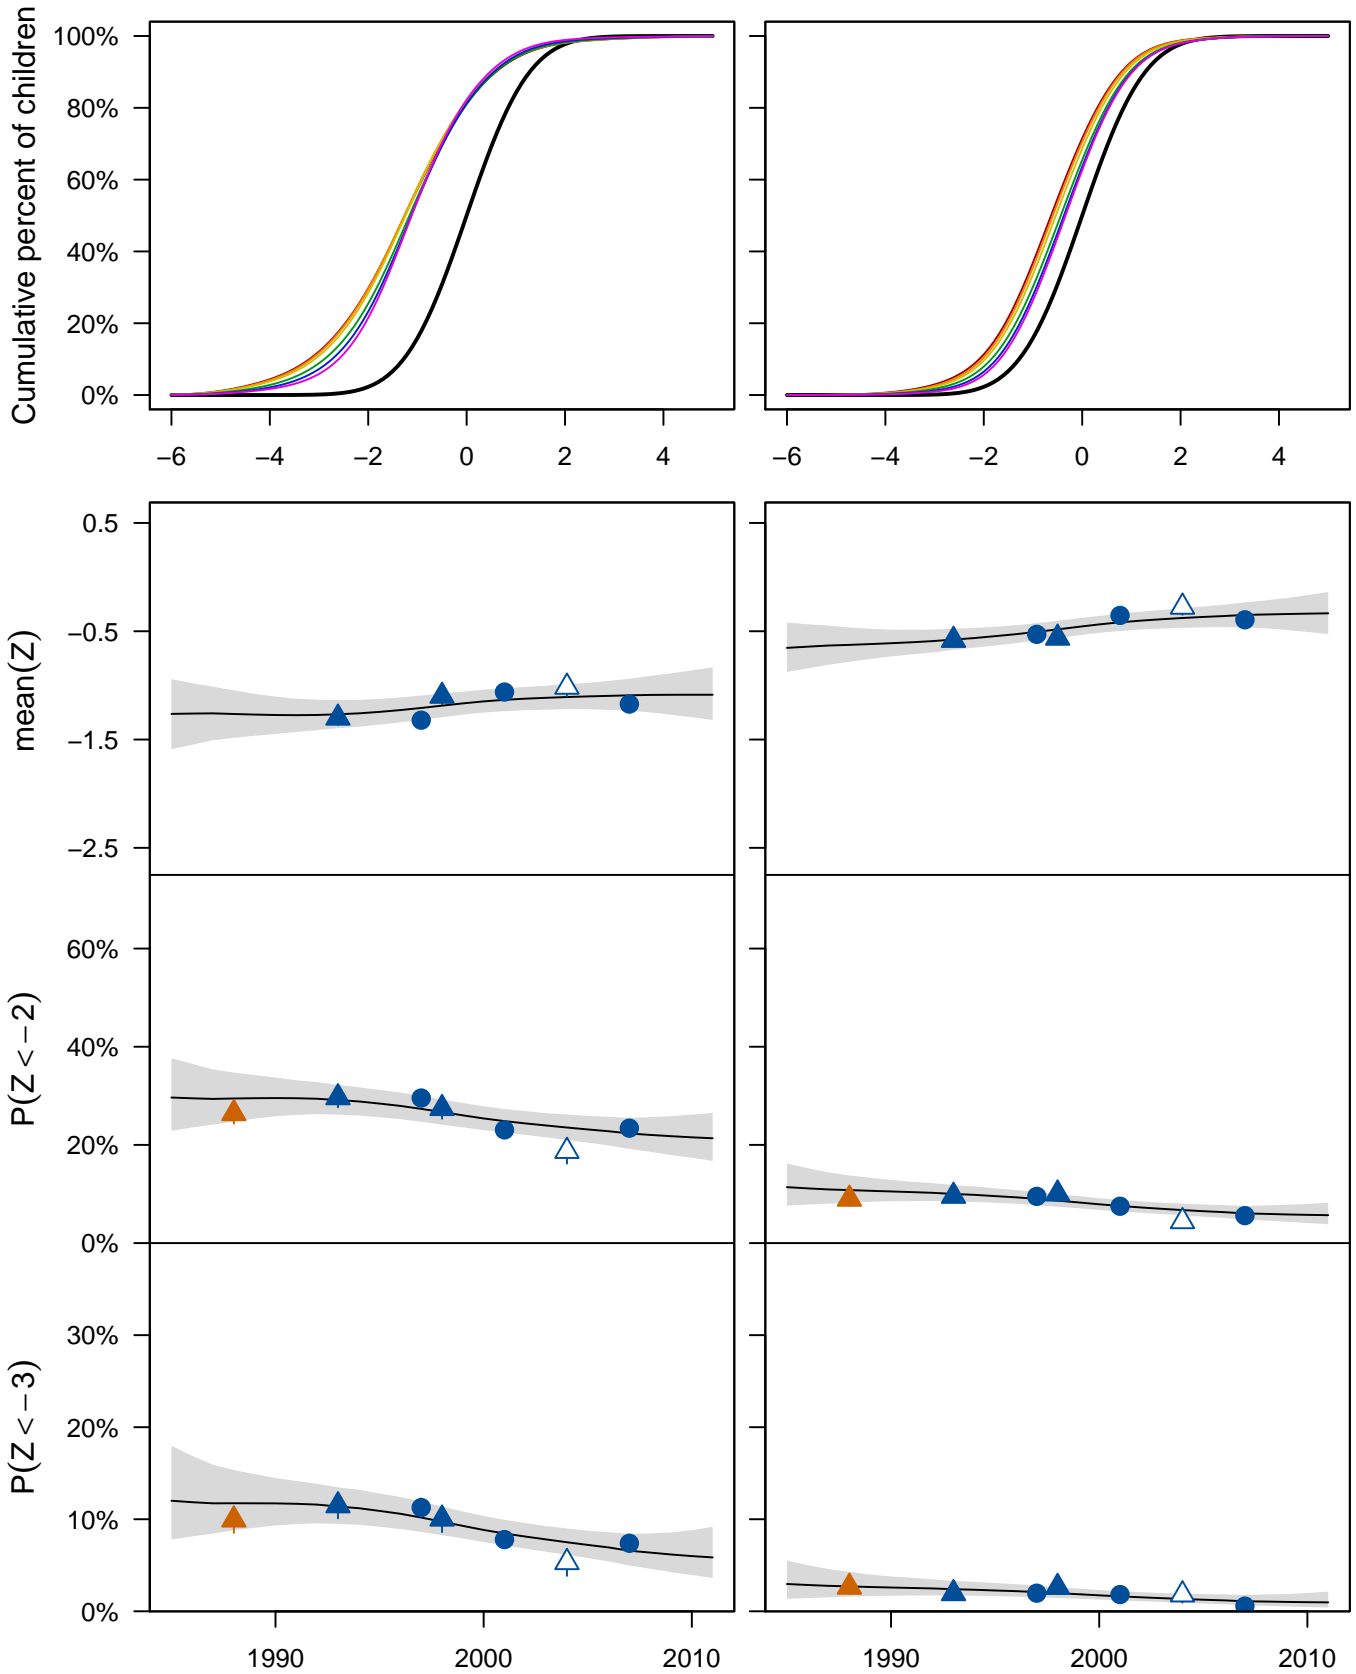

# Niger

## Sub-Saharan Africa Region

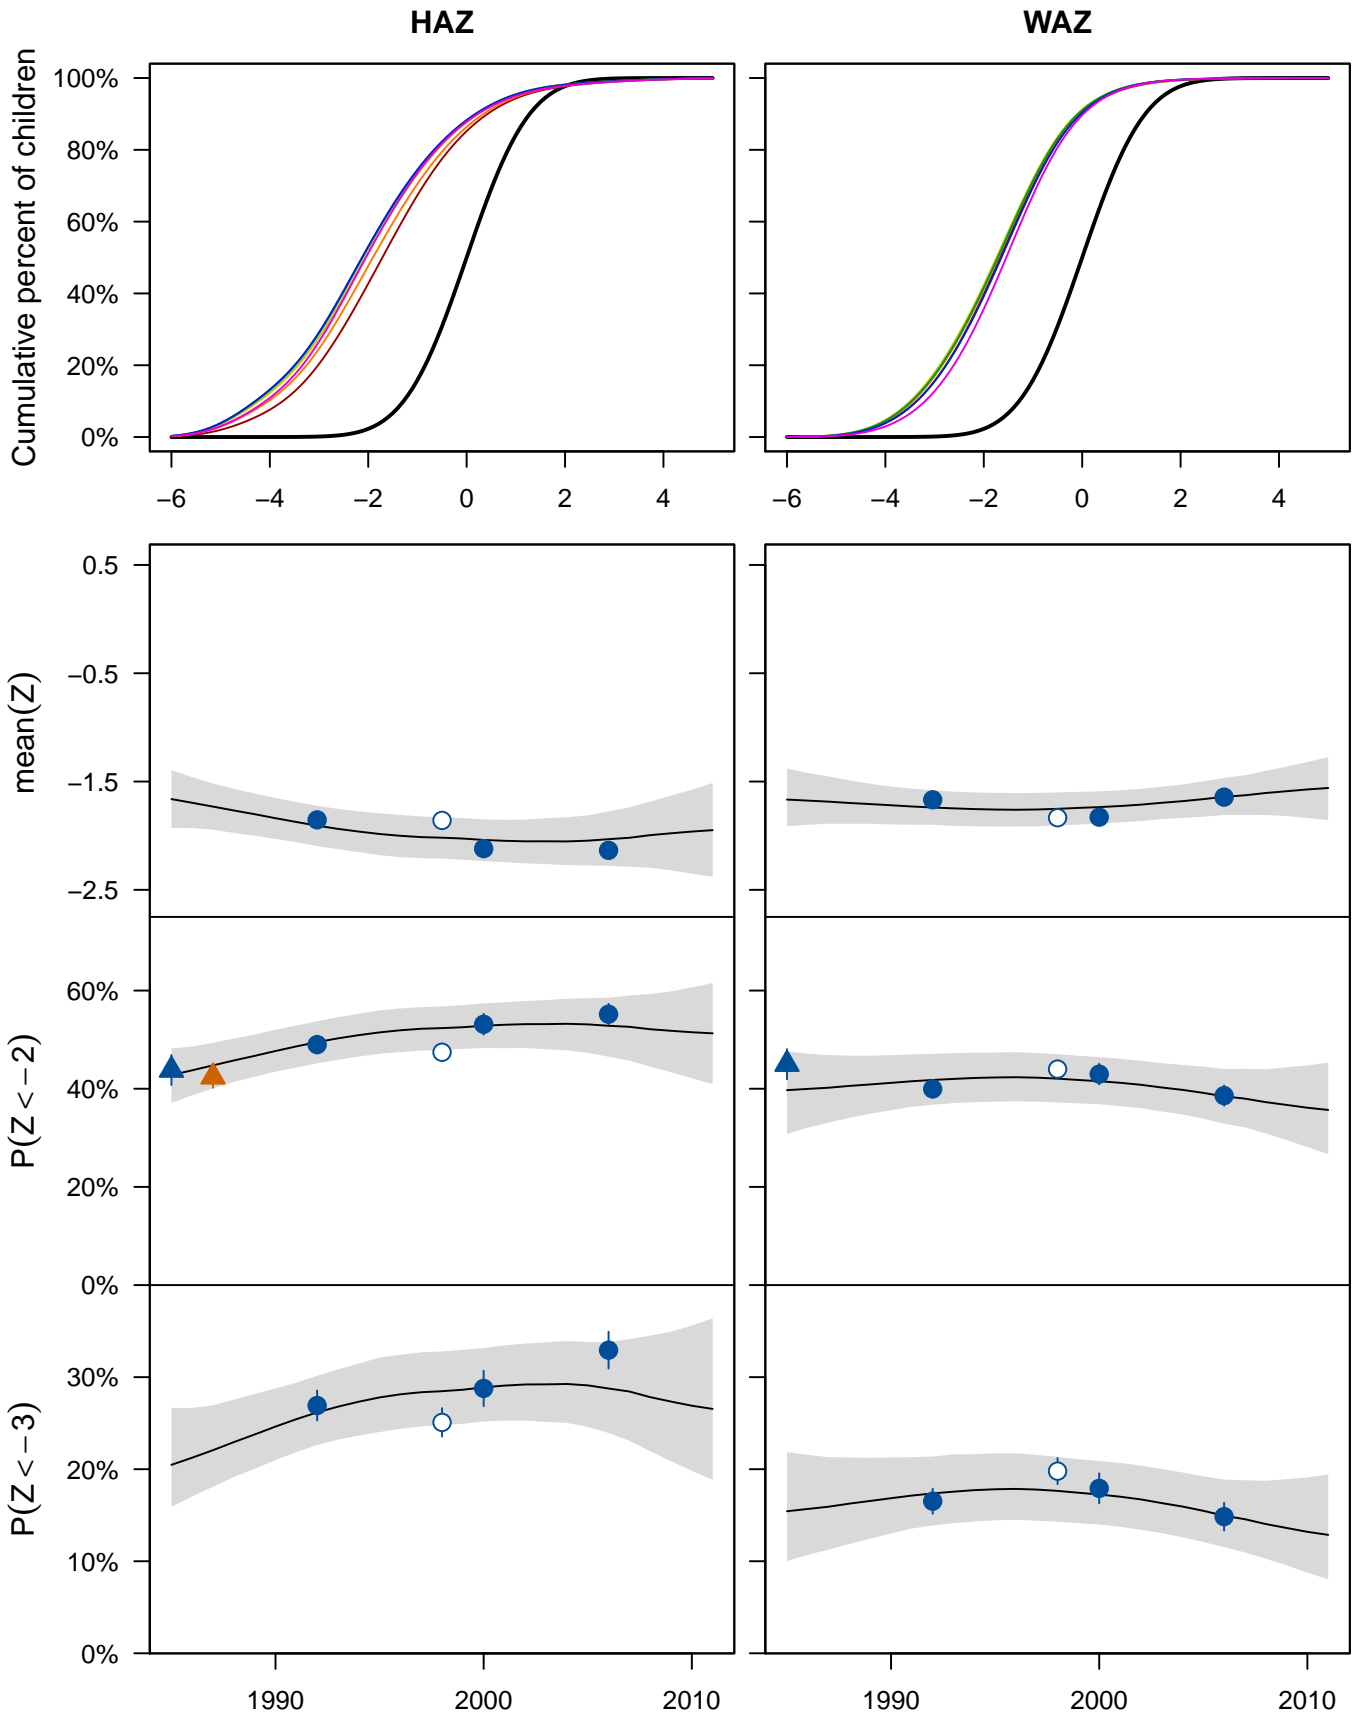

# Nigeria

## Sub-Saharan Africa Region

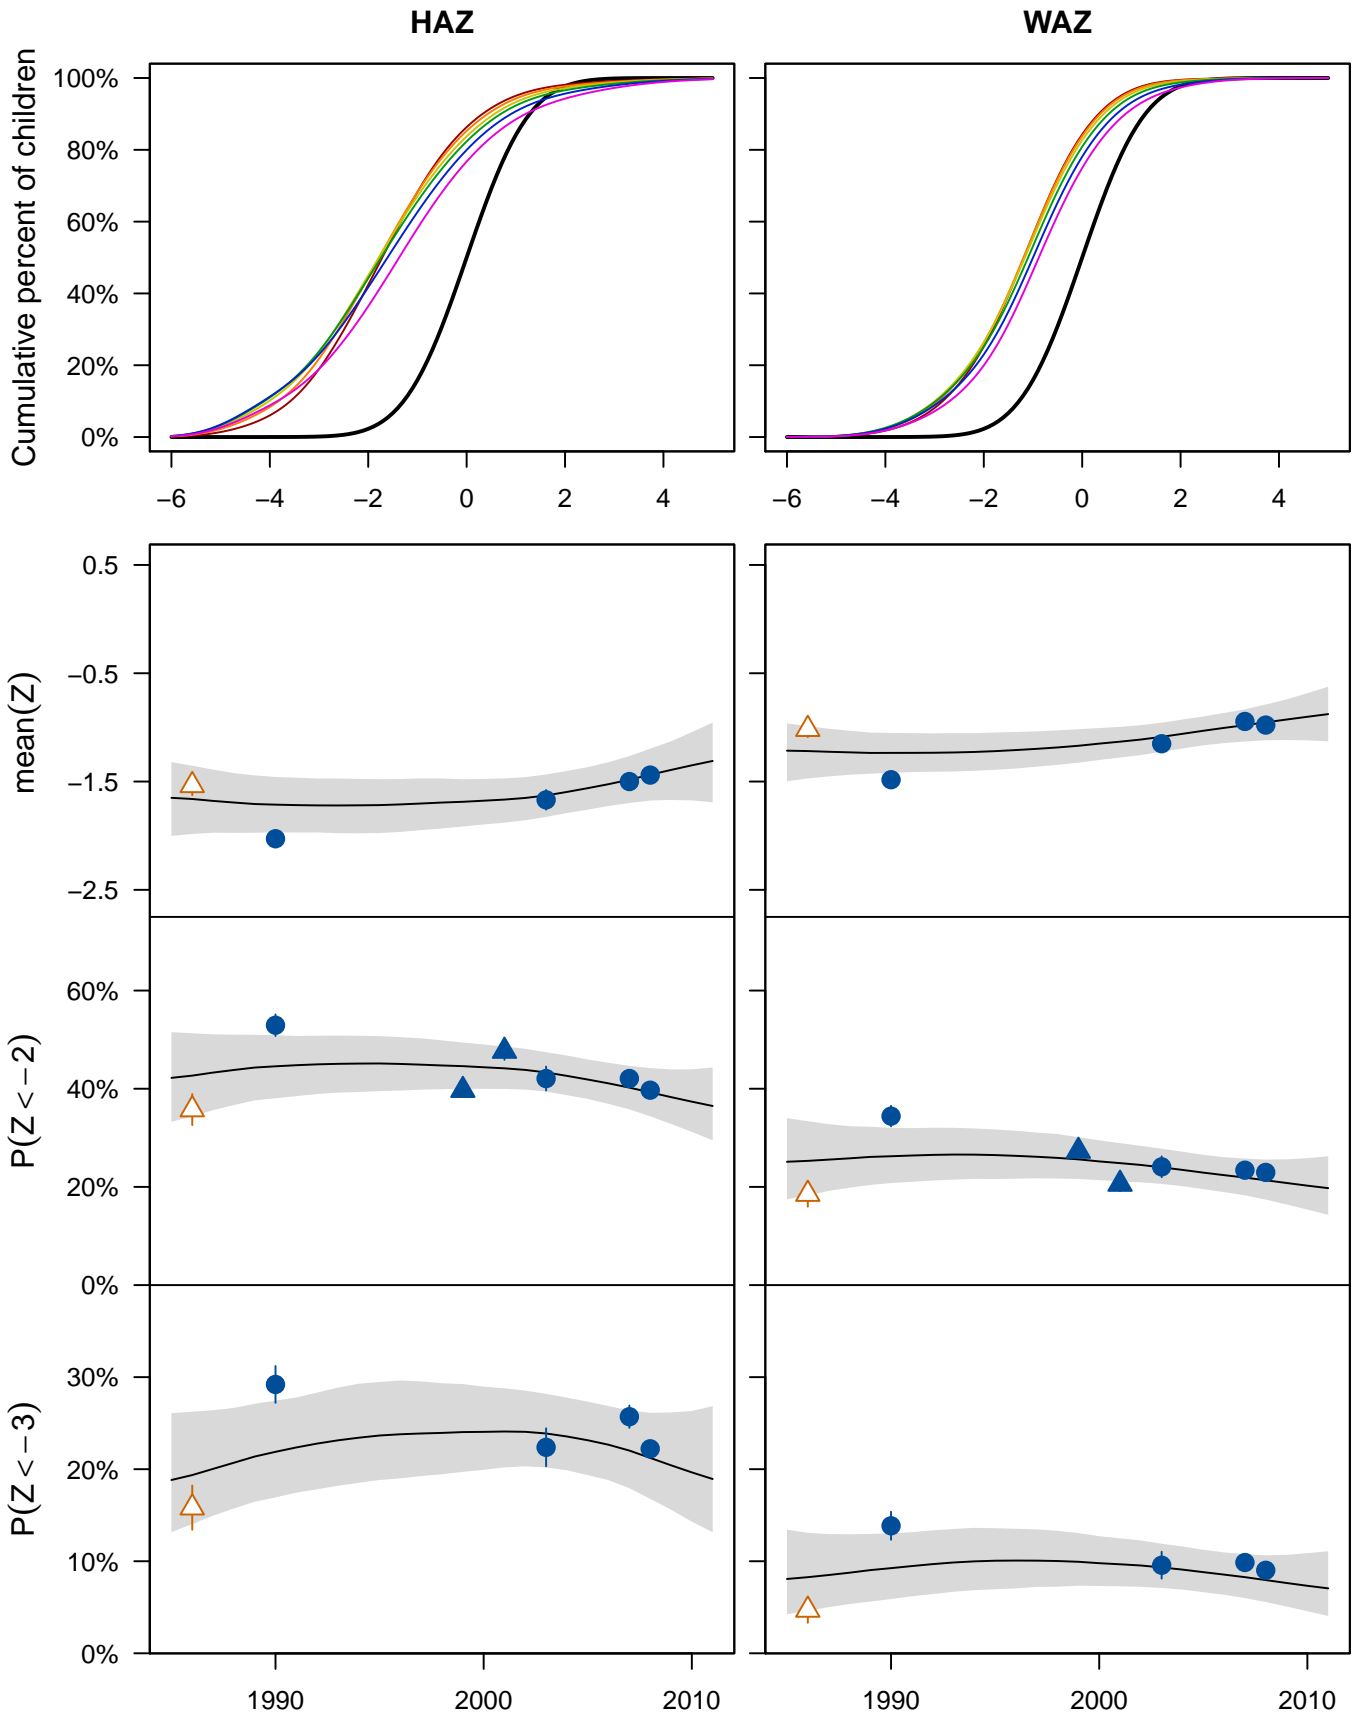



# Occupied Palestinian Territory

Central Asia, Middle East, and North Africa Region

HAZ

WAZ

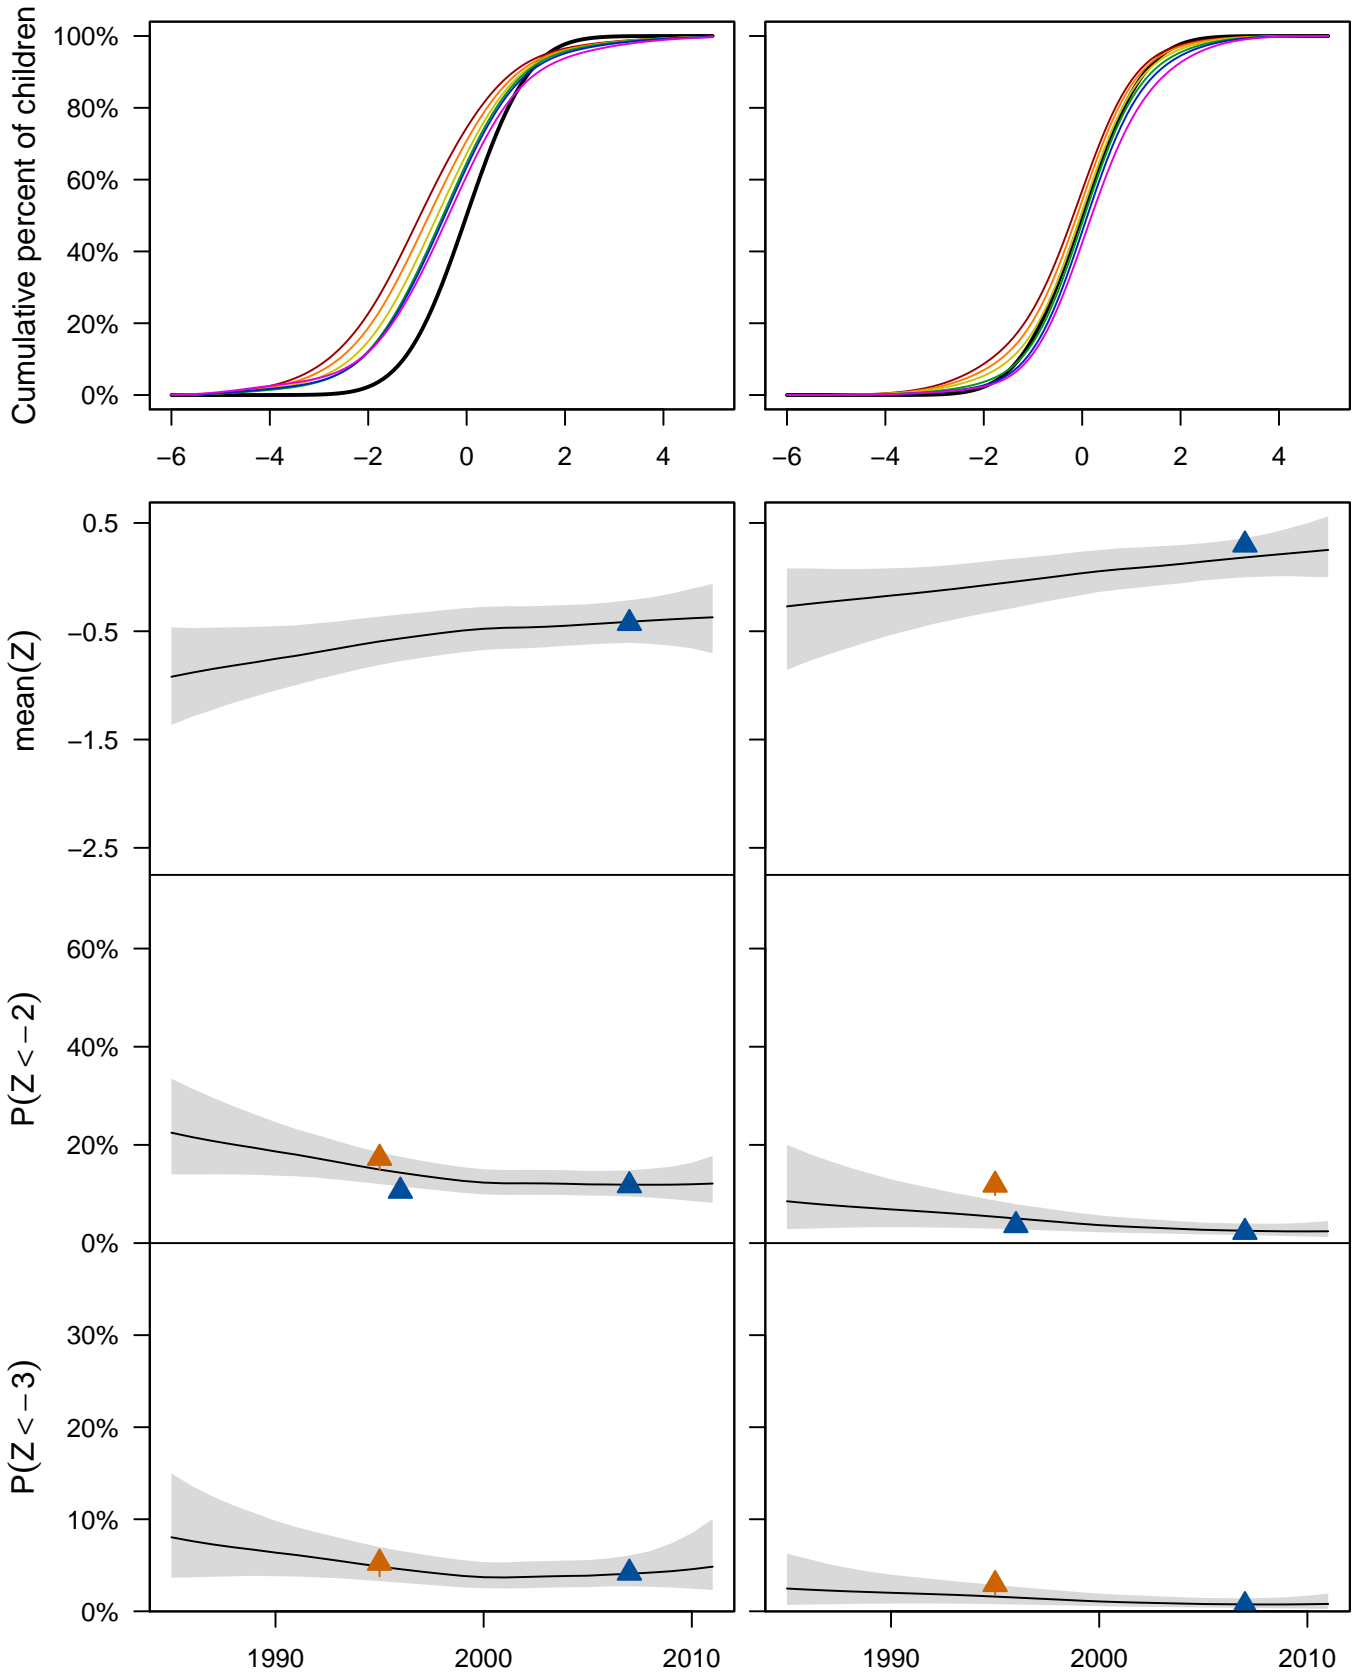

# Oman

Central Asia, Middle East, and North Africa Region

HAZ

WAZ

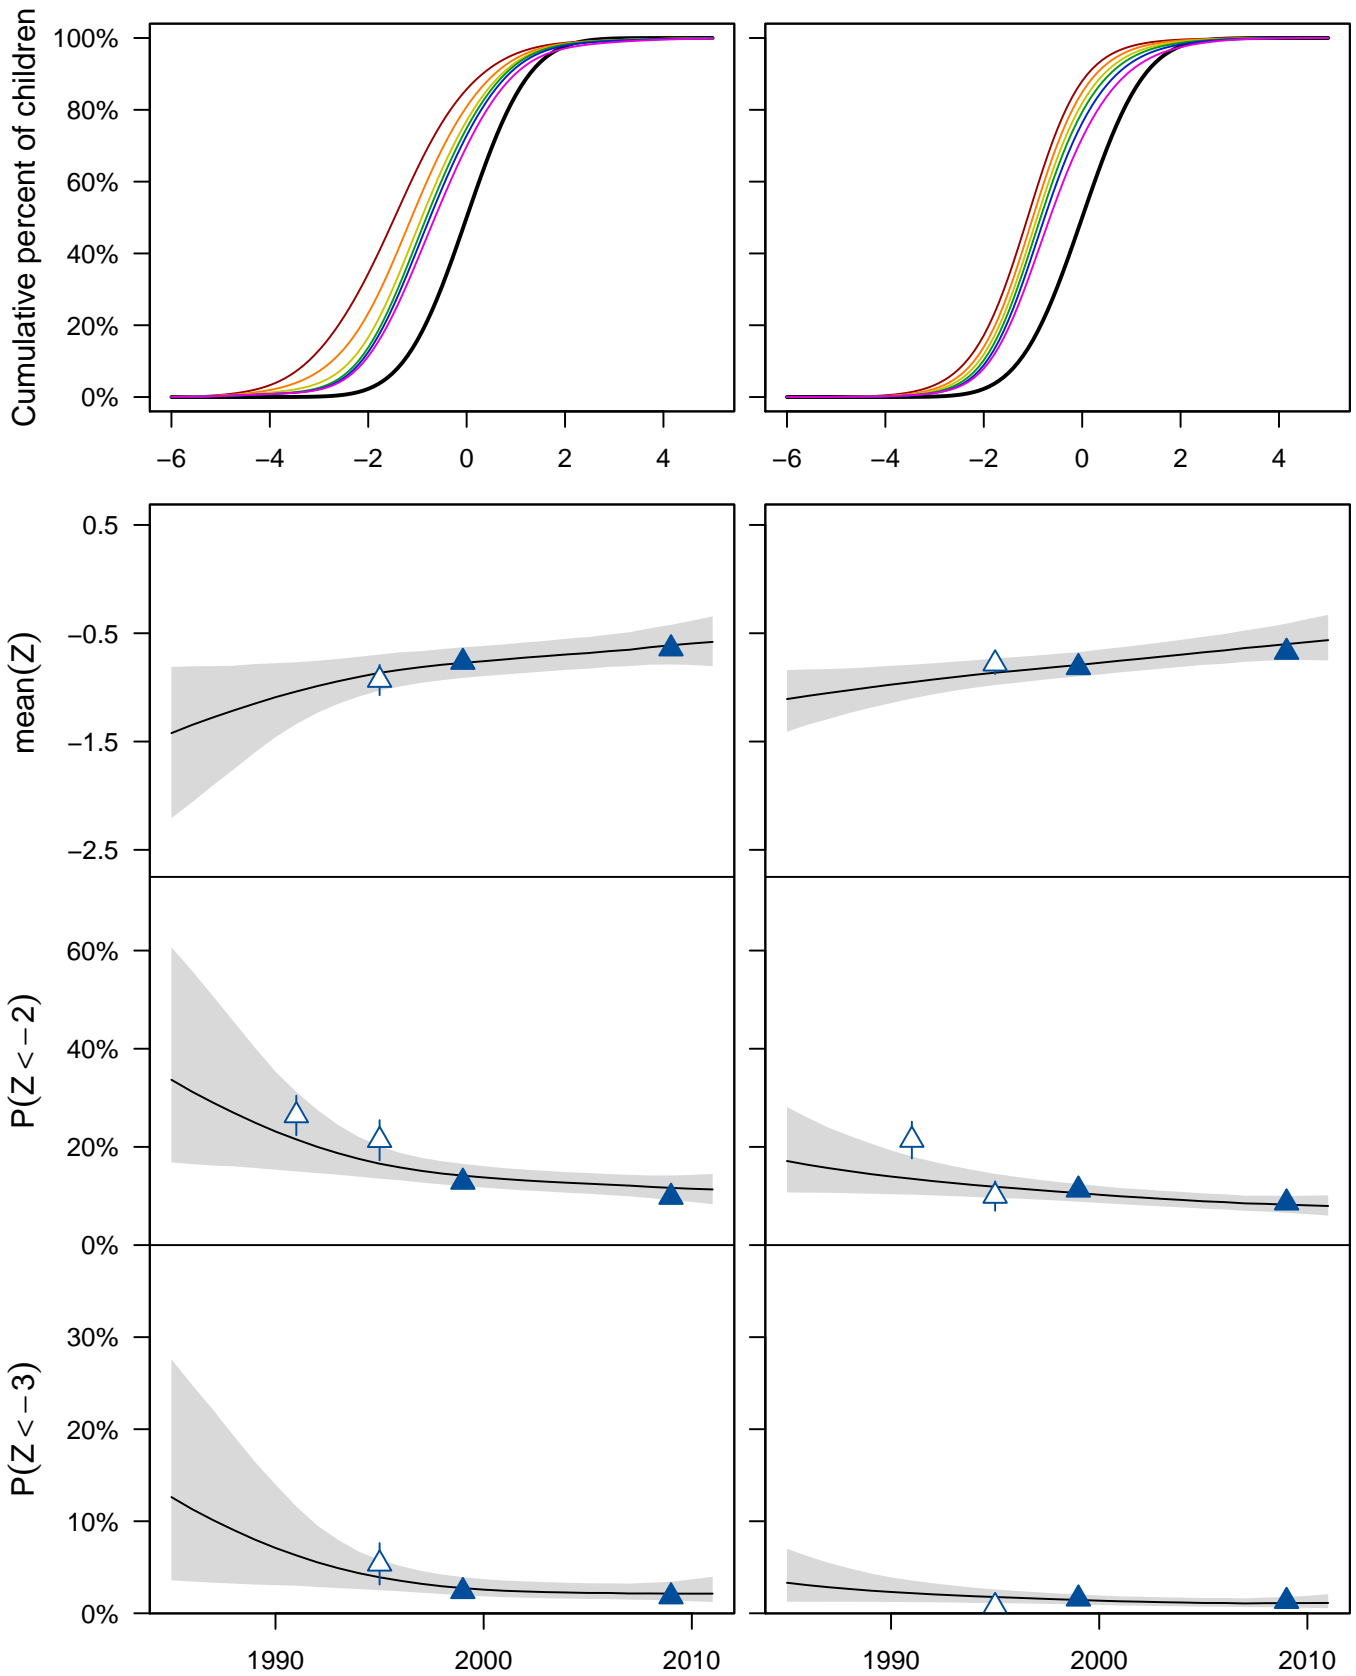

# Pakistan

## South Asia Region

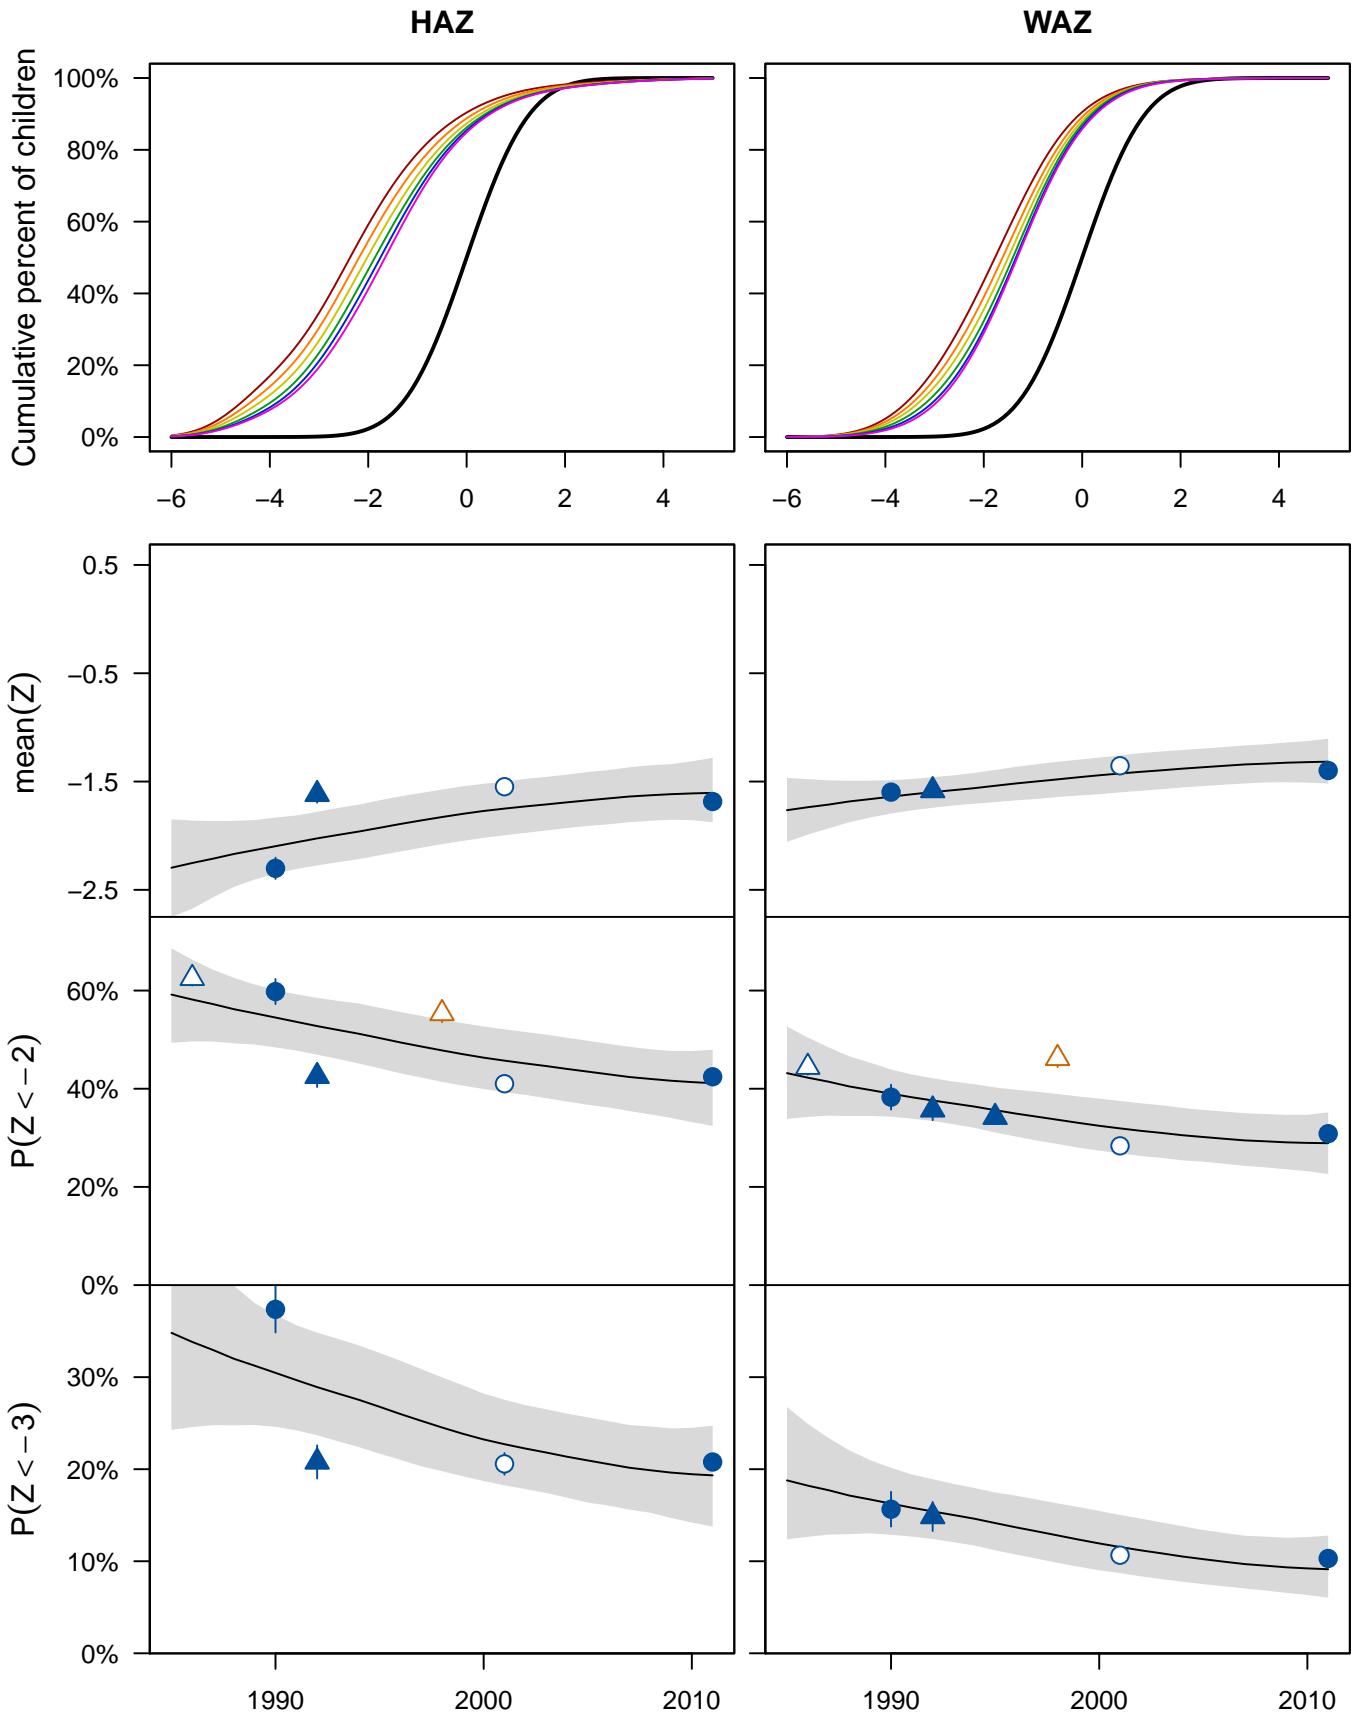

# Panama

Andean and Central Latin America and Caribbean Region

HAZ

WAZ

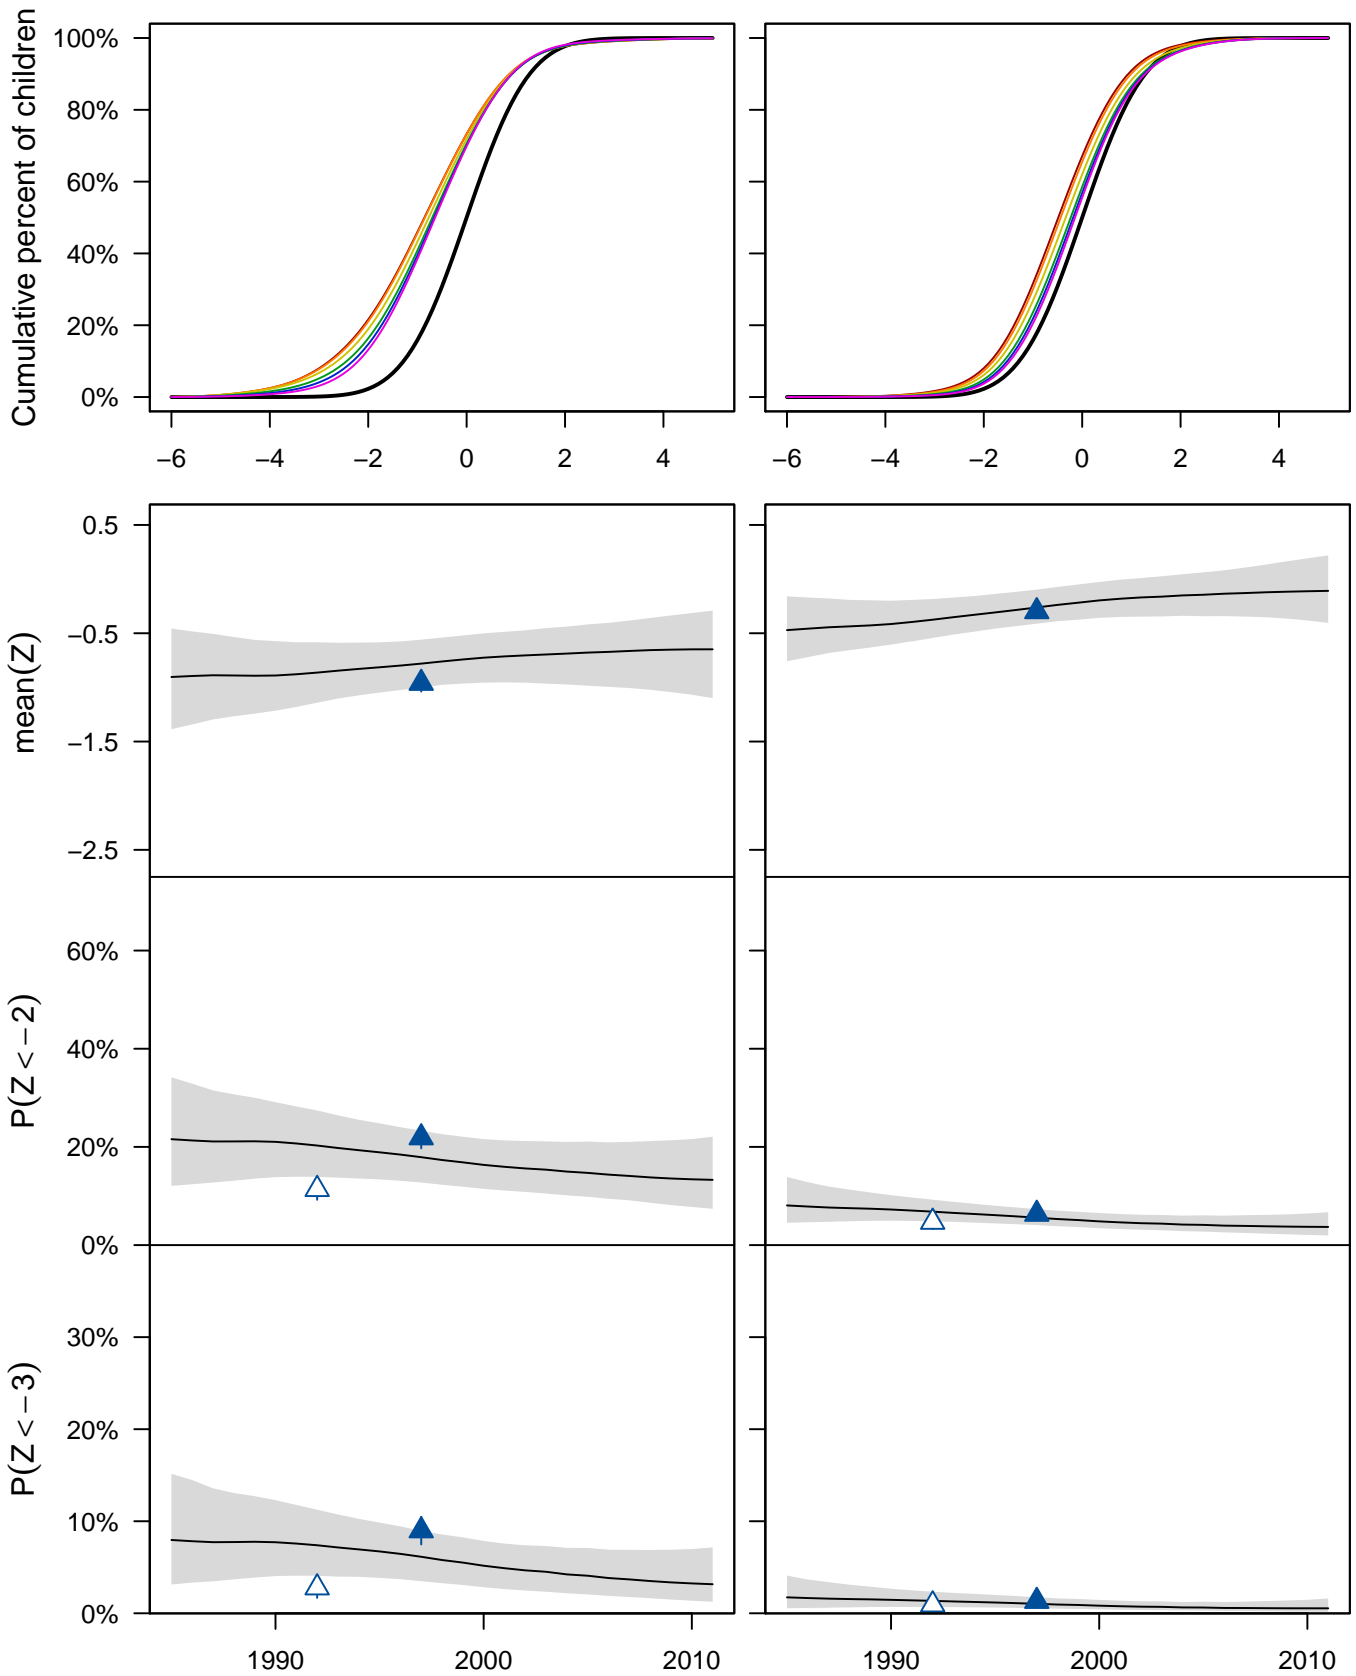

# Papua New Guinea

Oceania Region

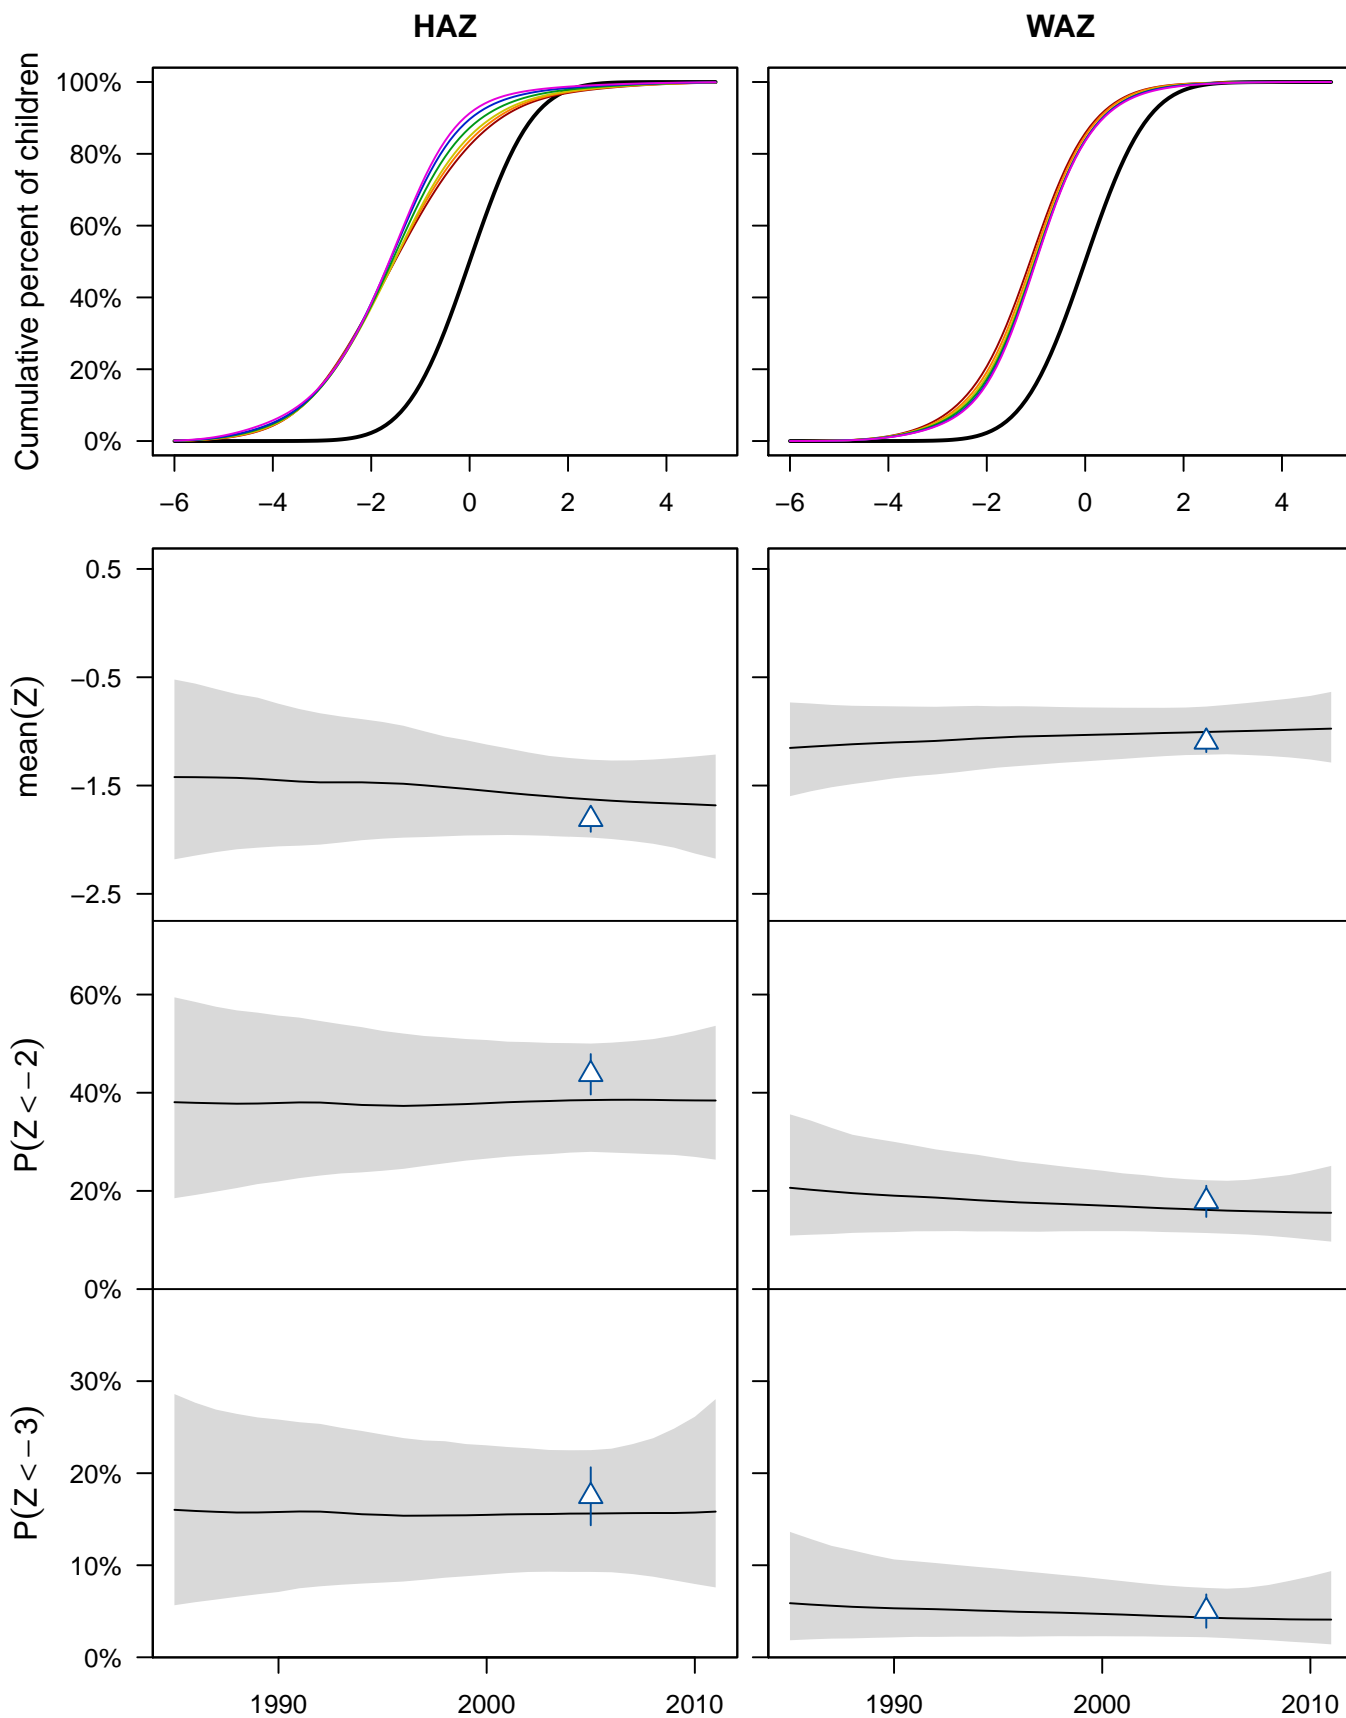

# Paraguay

Southern and Tropical Latin America Region

HAZ

WAZ

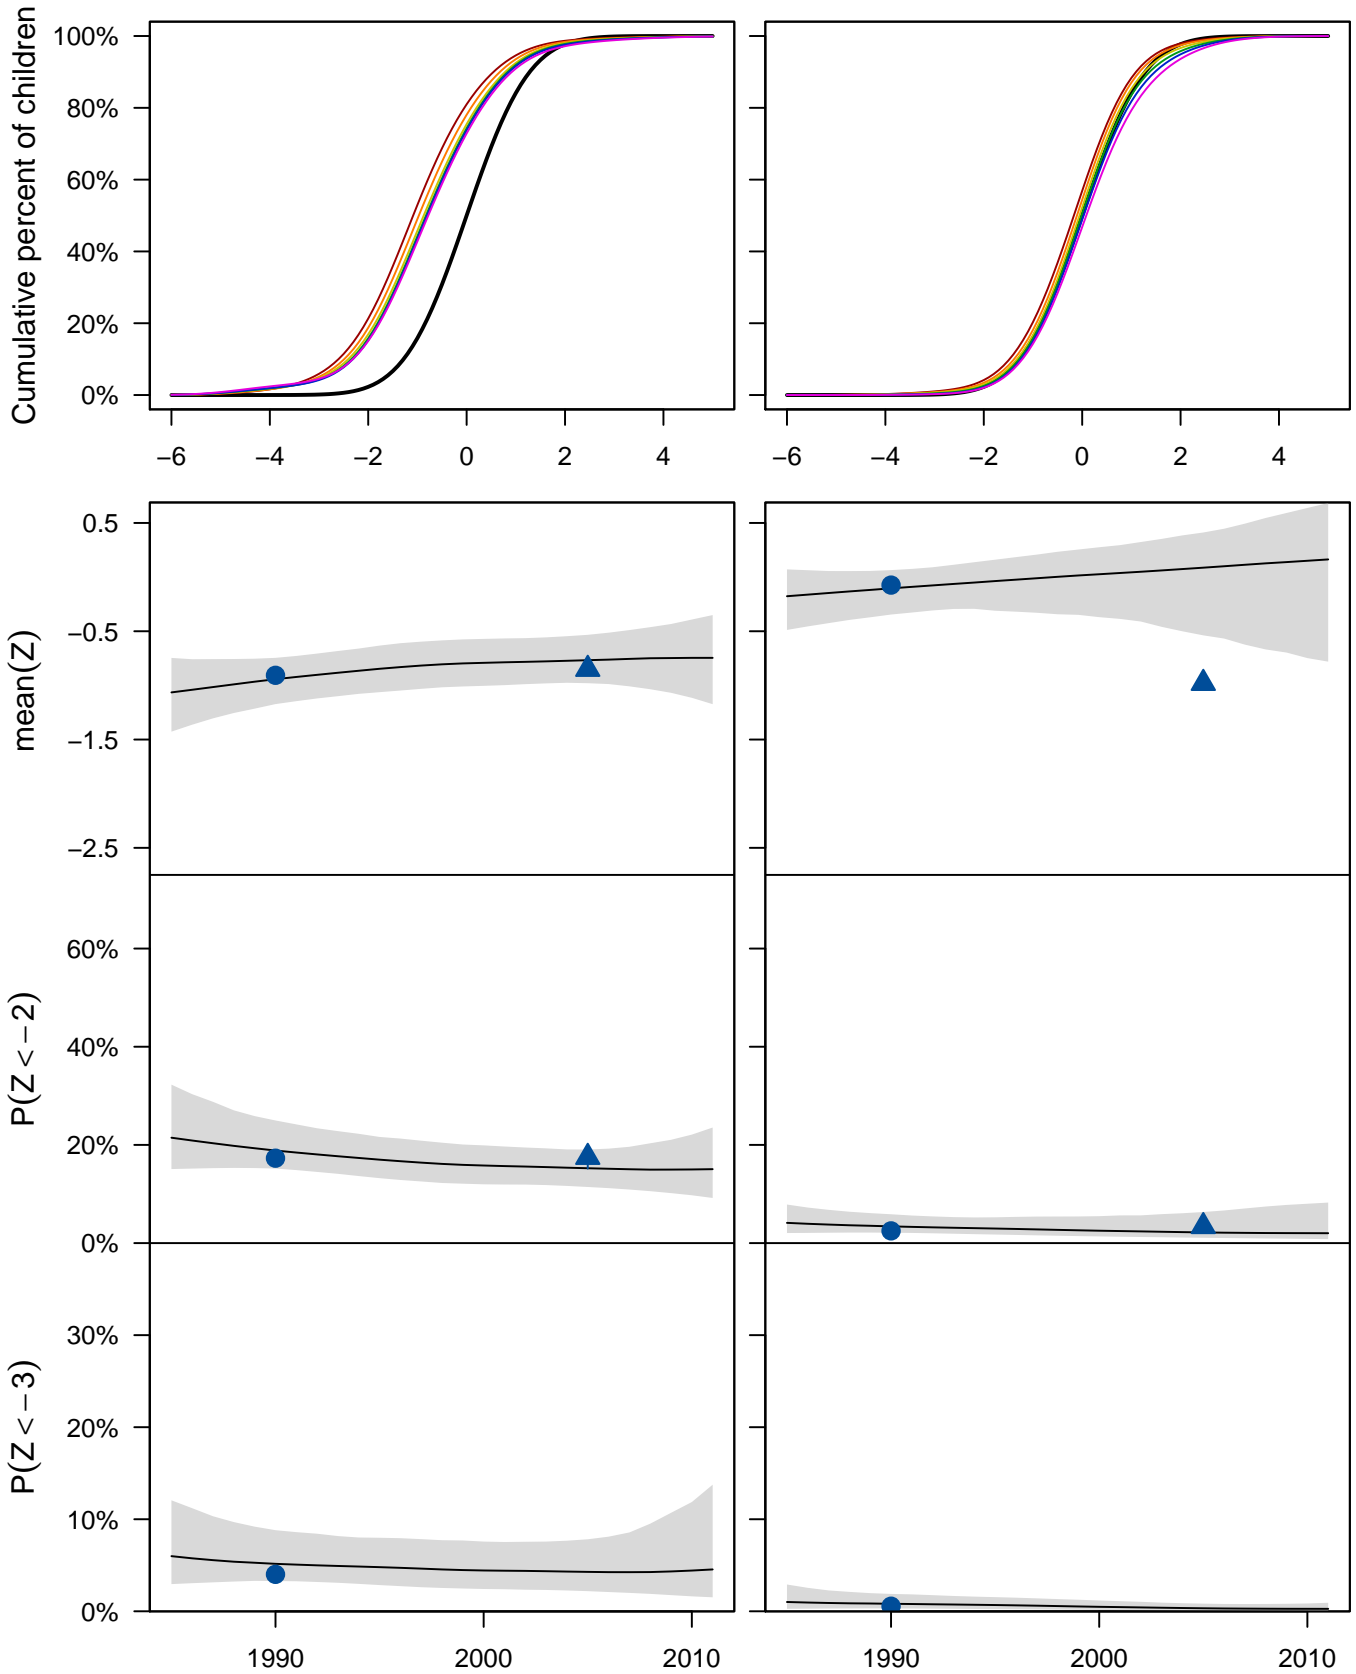

# Peru

Andean and Central Latin America and Caribbean Region

HAZ

WAZ

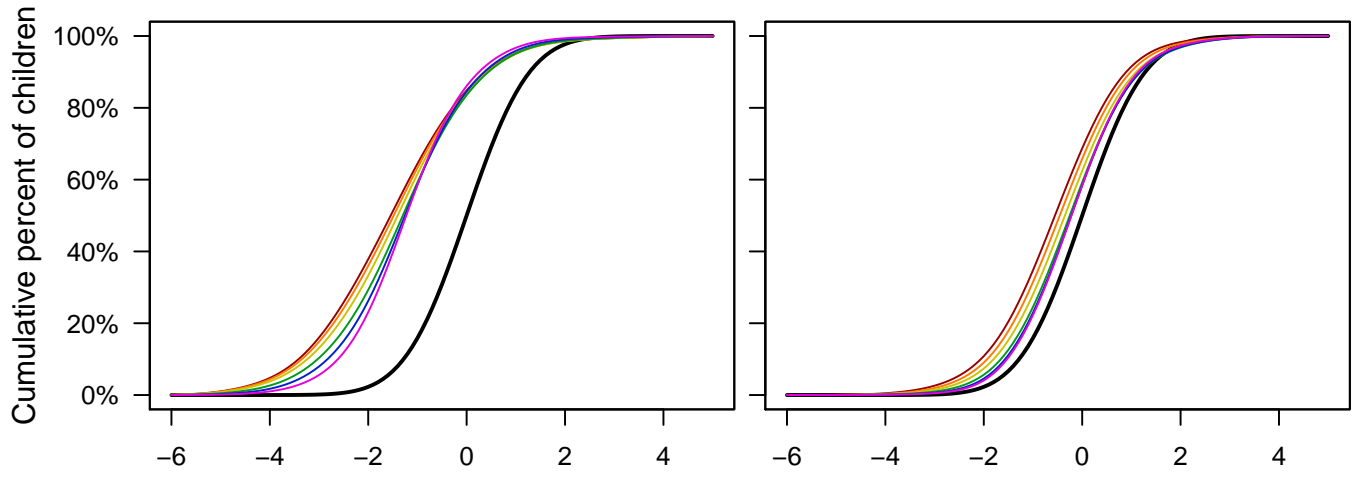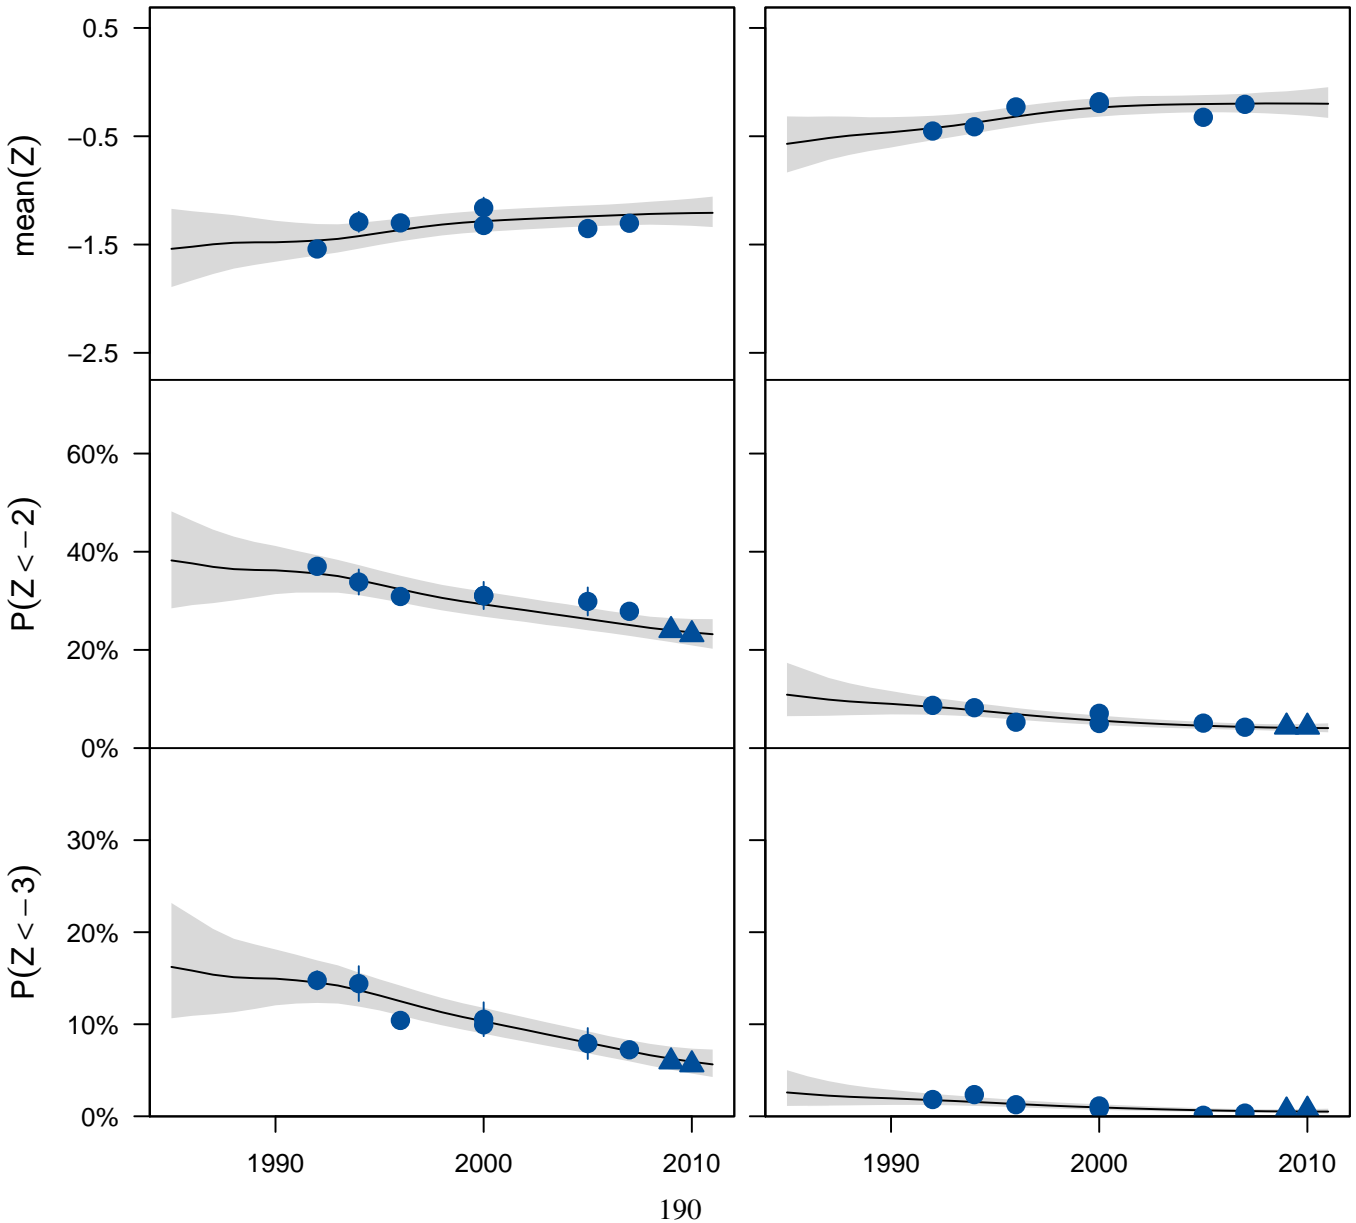

# Philippines

East and Southeast Asia Region

HAZ

WAZ

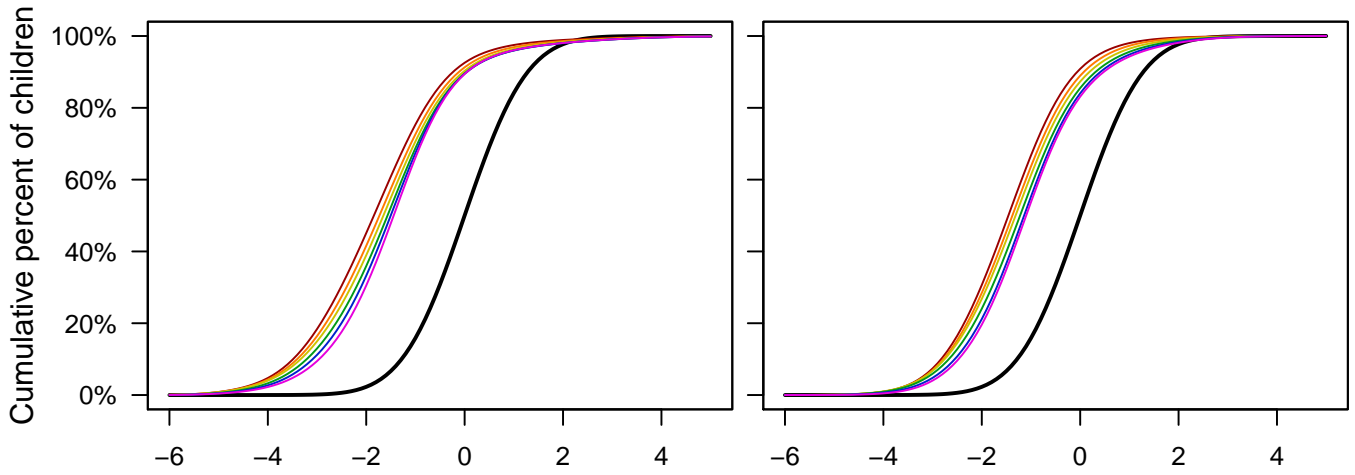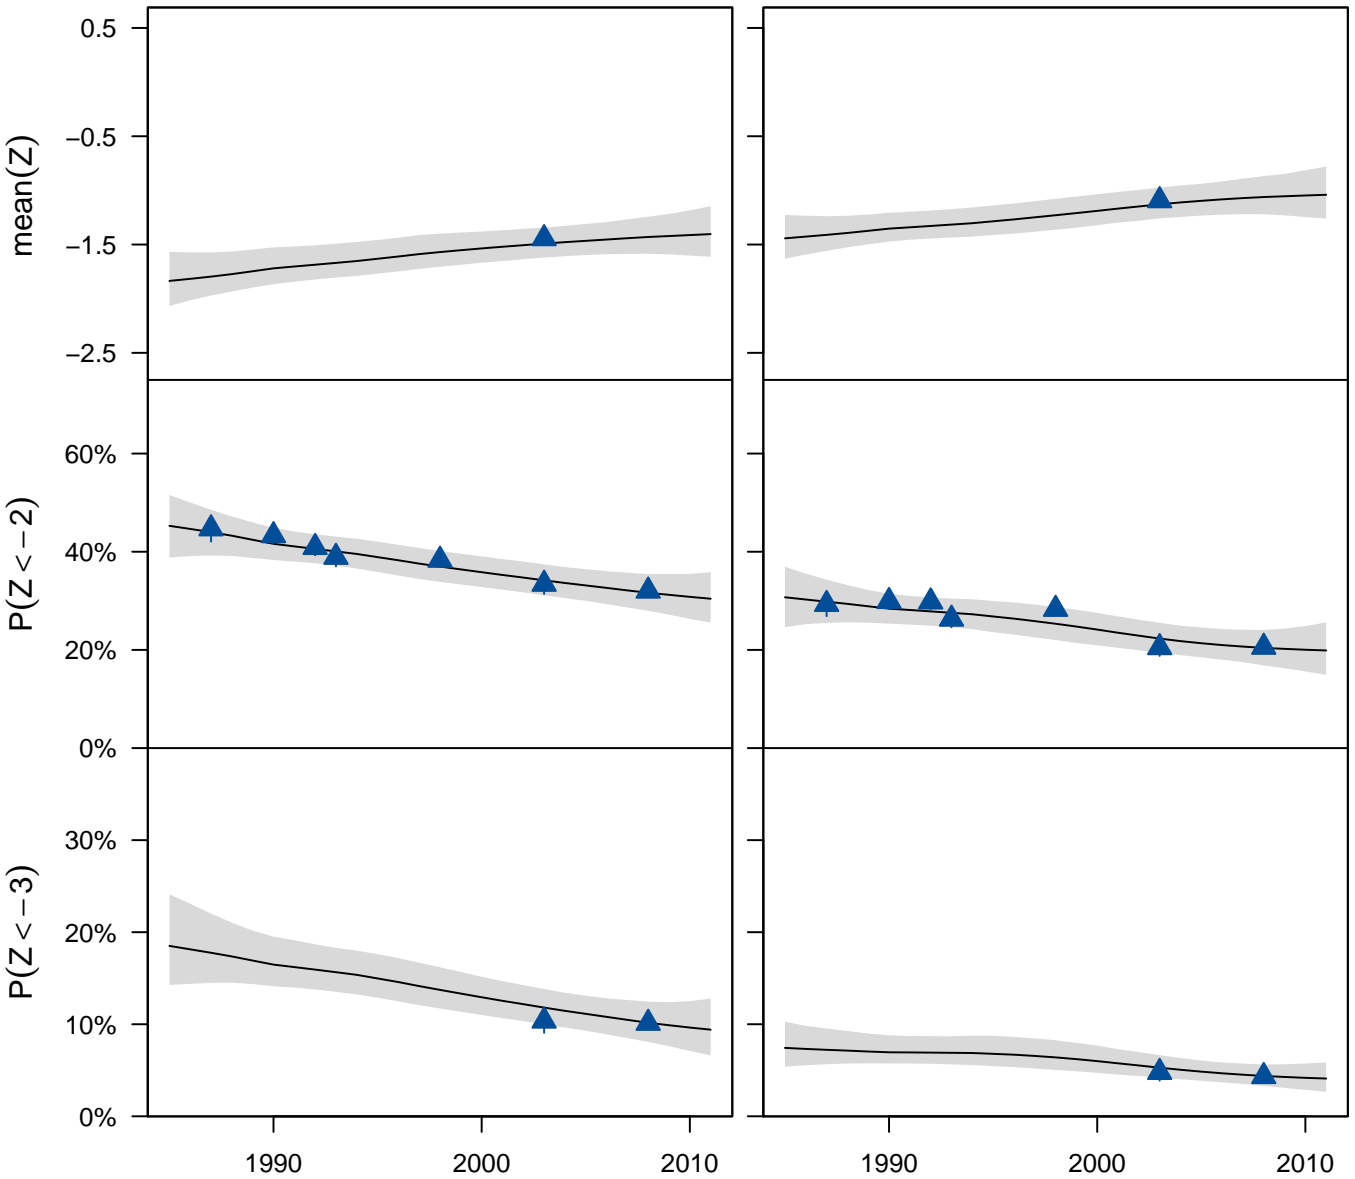



# Puerto Rico

Andean and Central Latin America and Caribbean Region

HAZ

WAZ

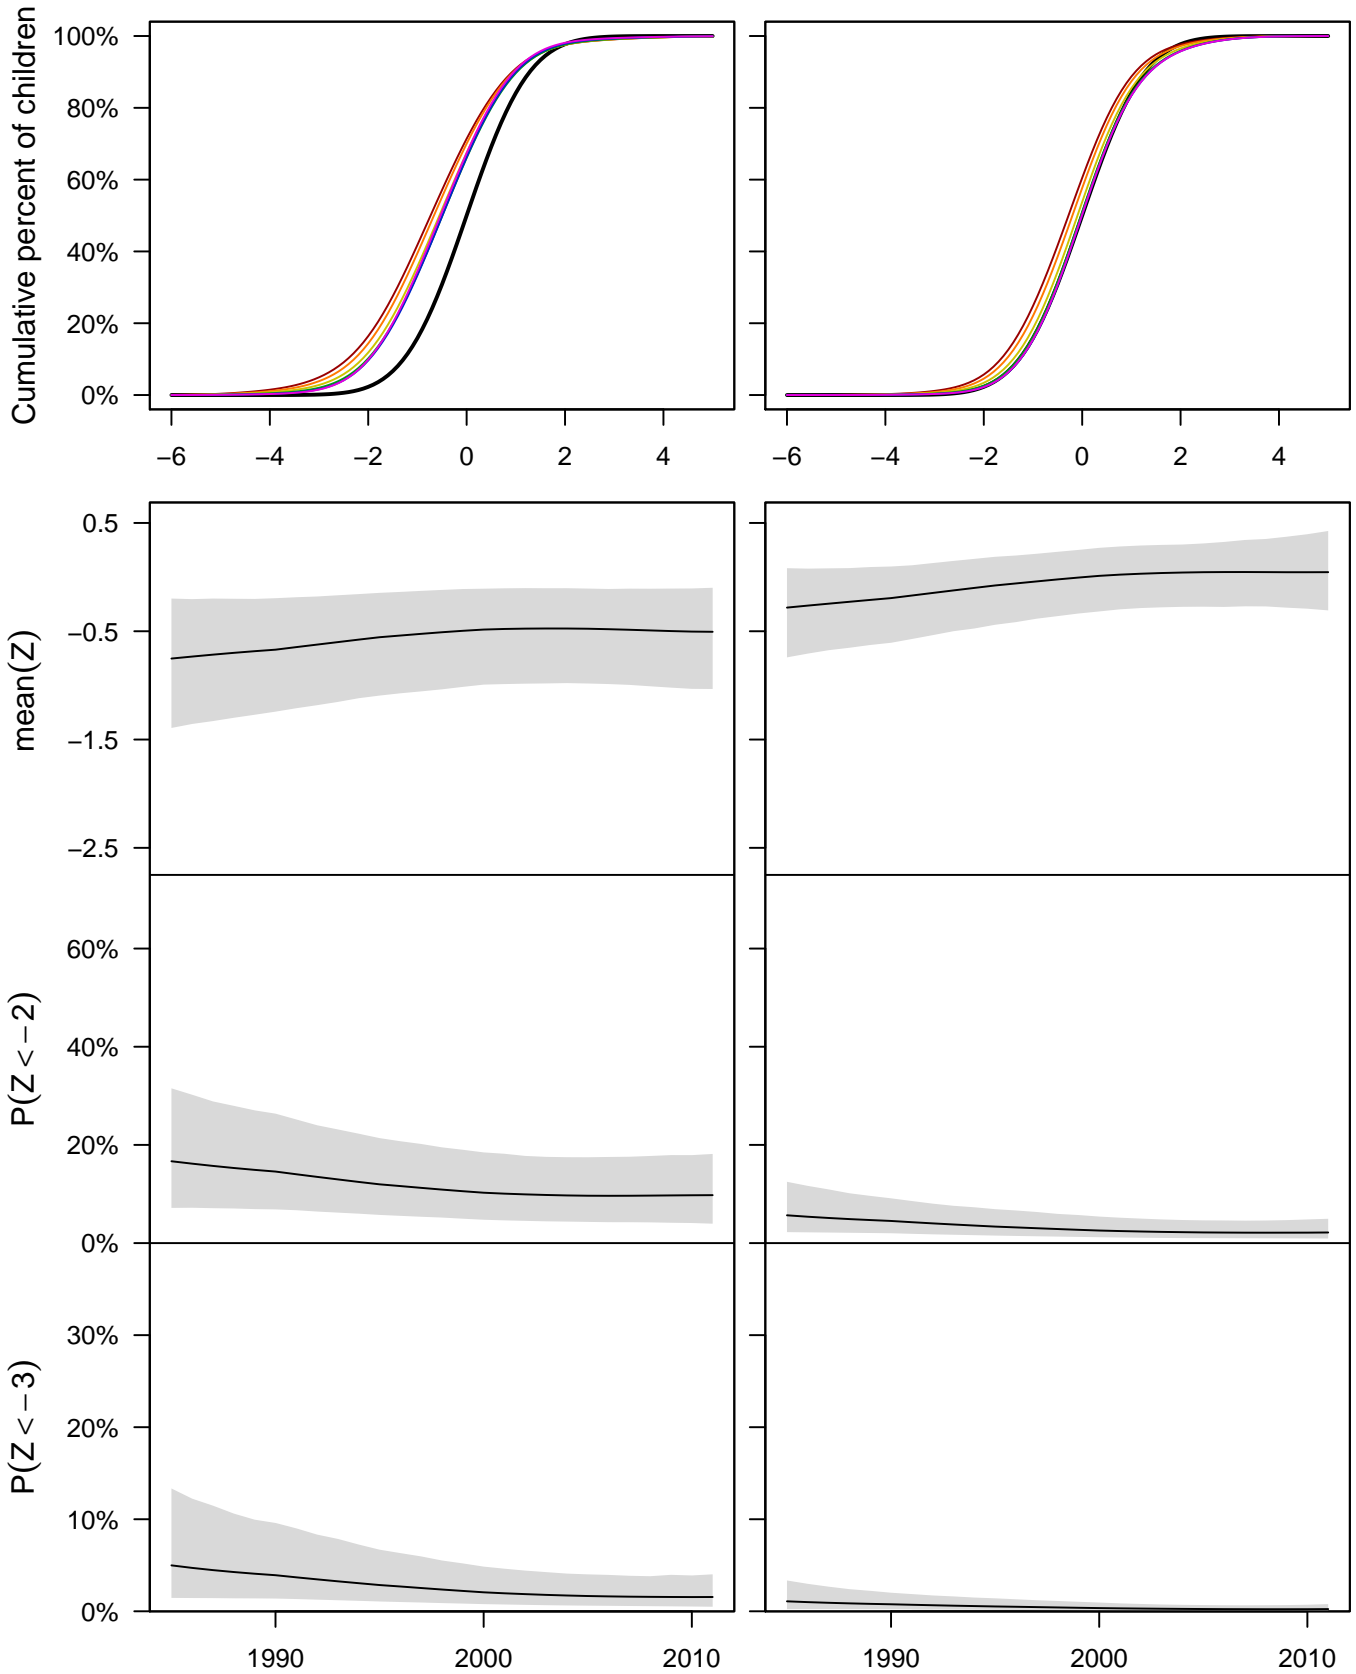

# Qatar

Central Asia, Middle East, and North Africa Region

HAZ

WAZ

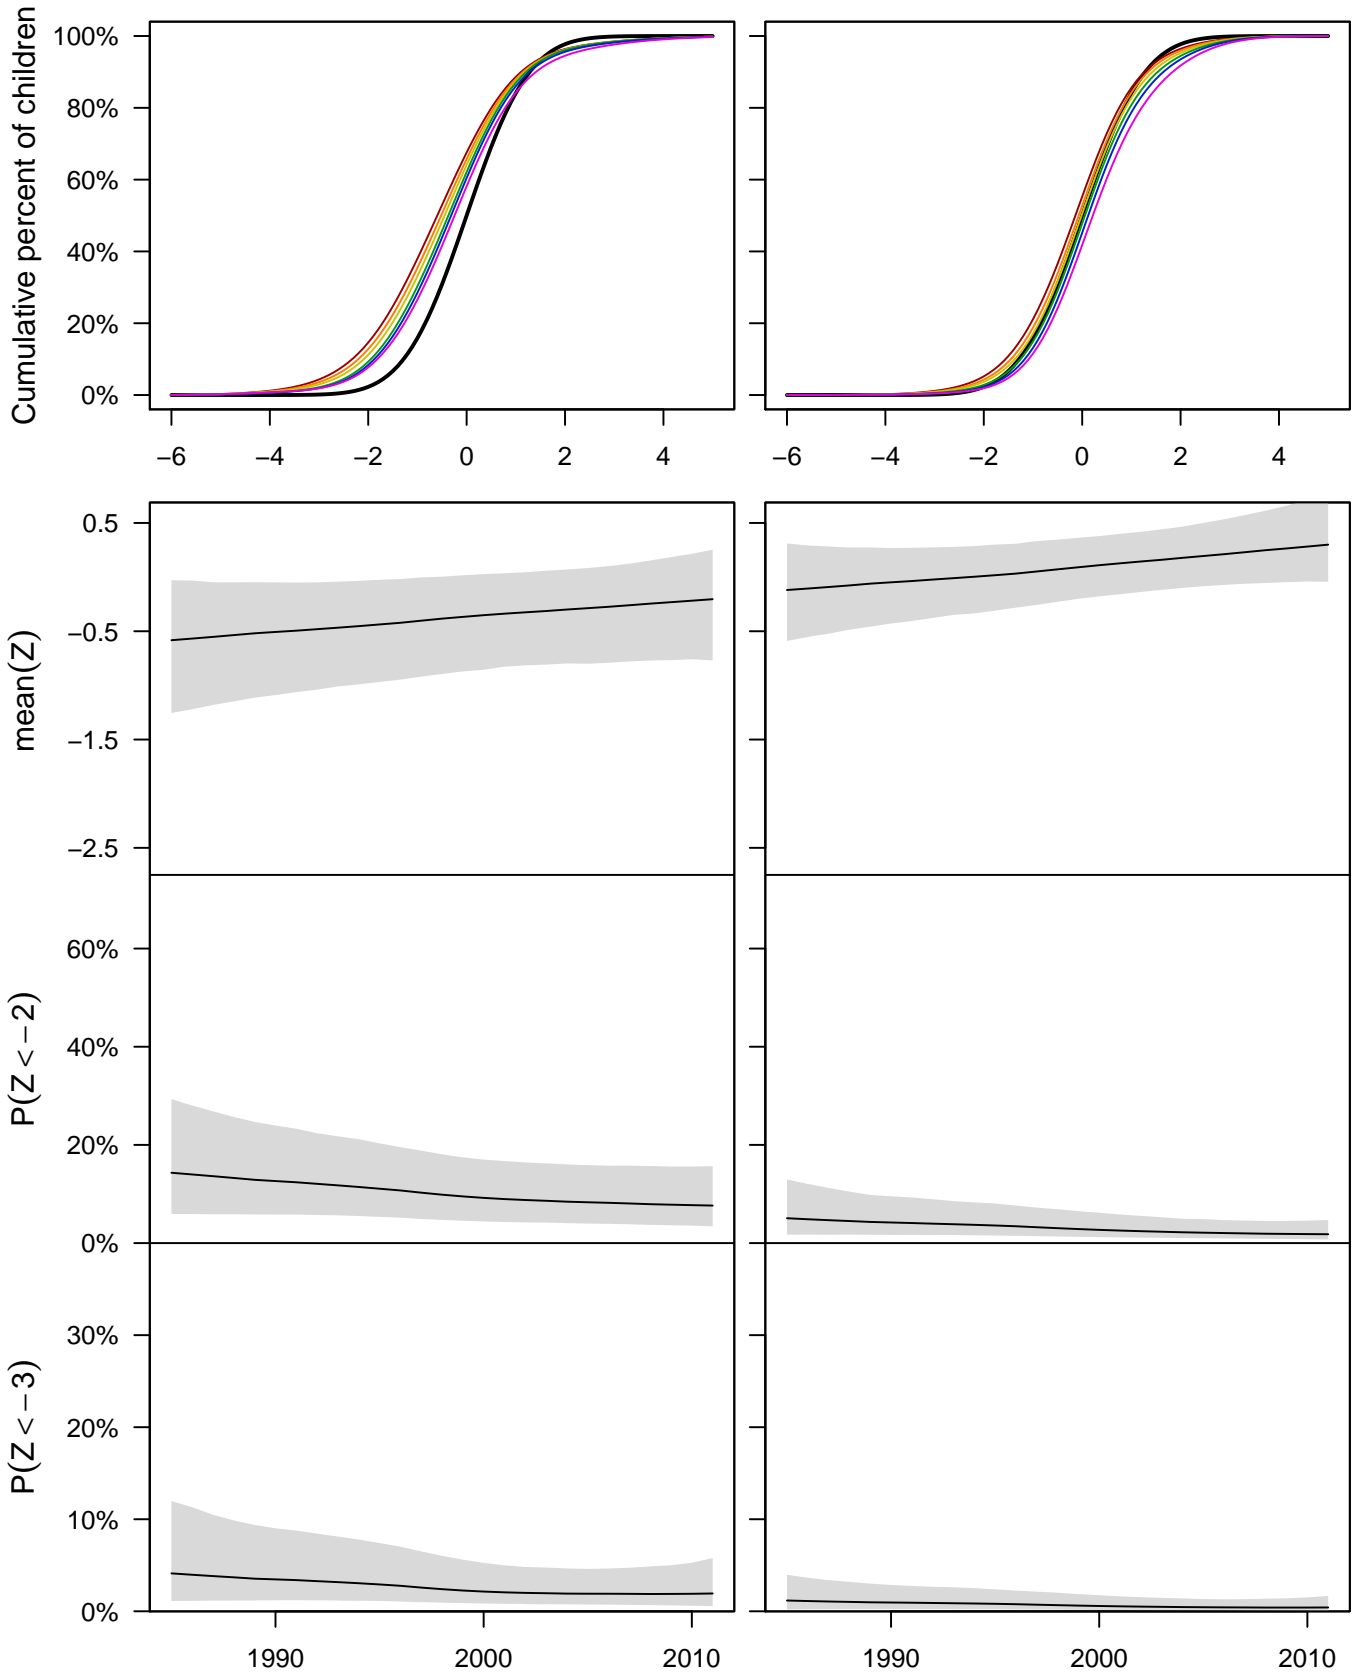

# Rwanda

Sub-Saharan Africa Region

HAZ

WAZ

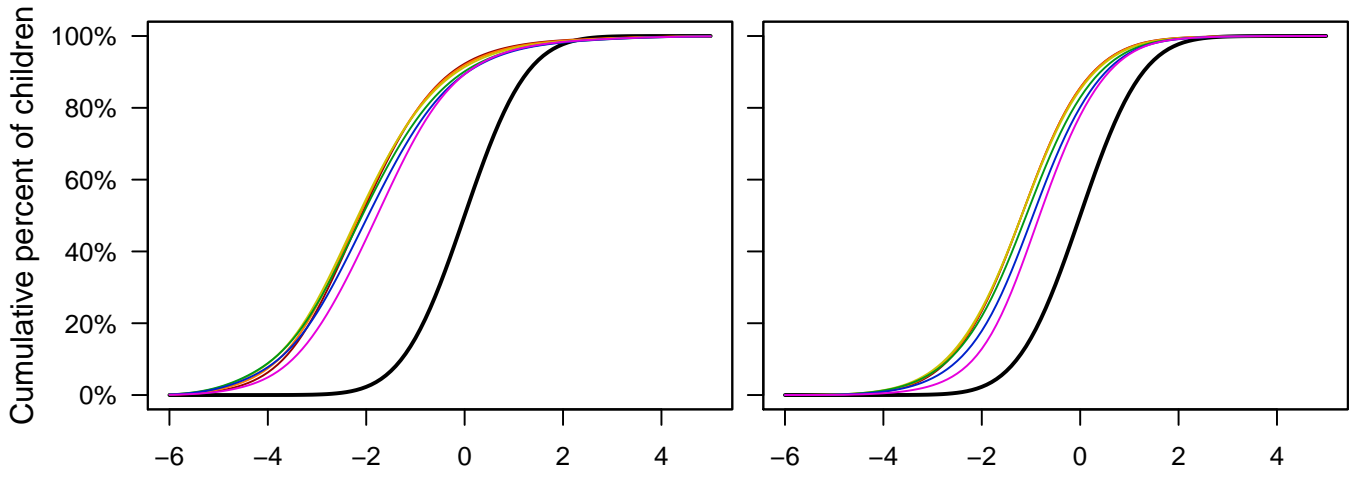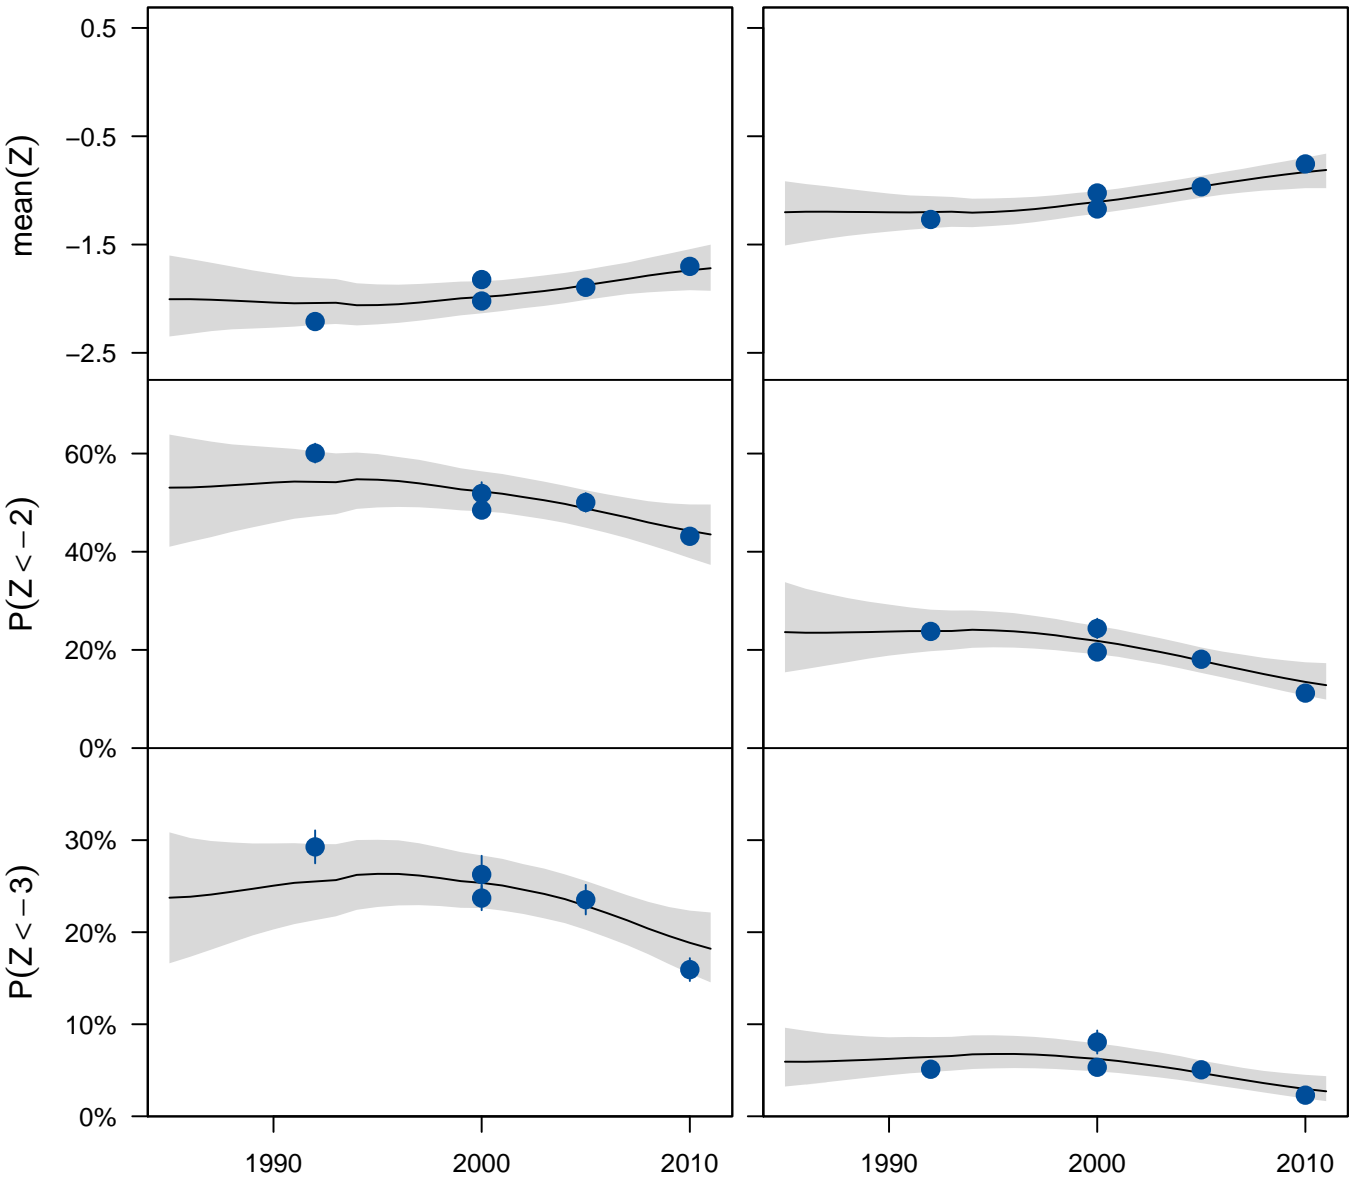

# Saint Lucia

Andean and Central Latin America and Caribbean Region

HAZ

WAZ

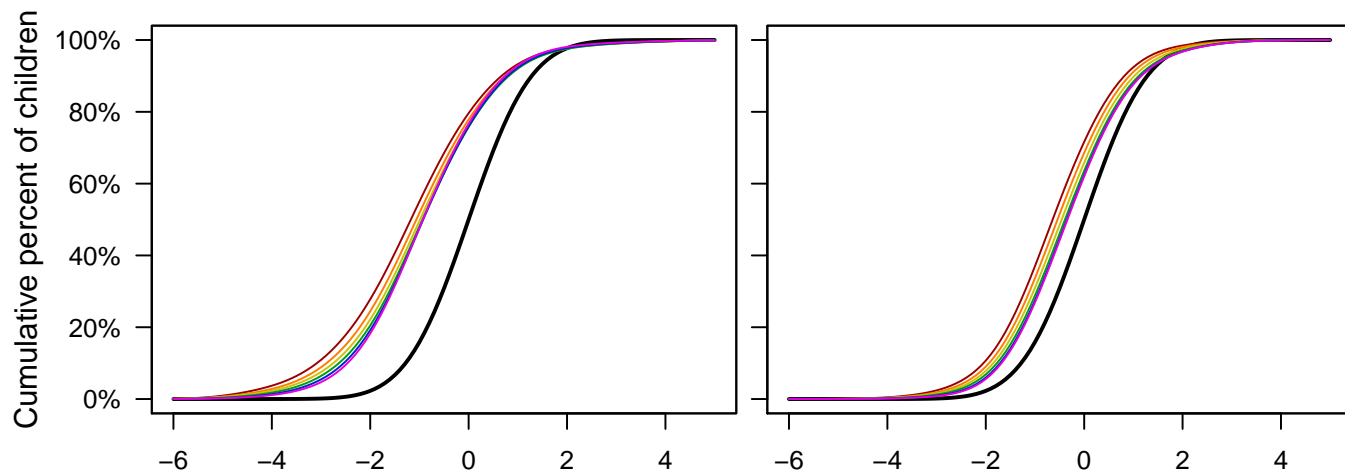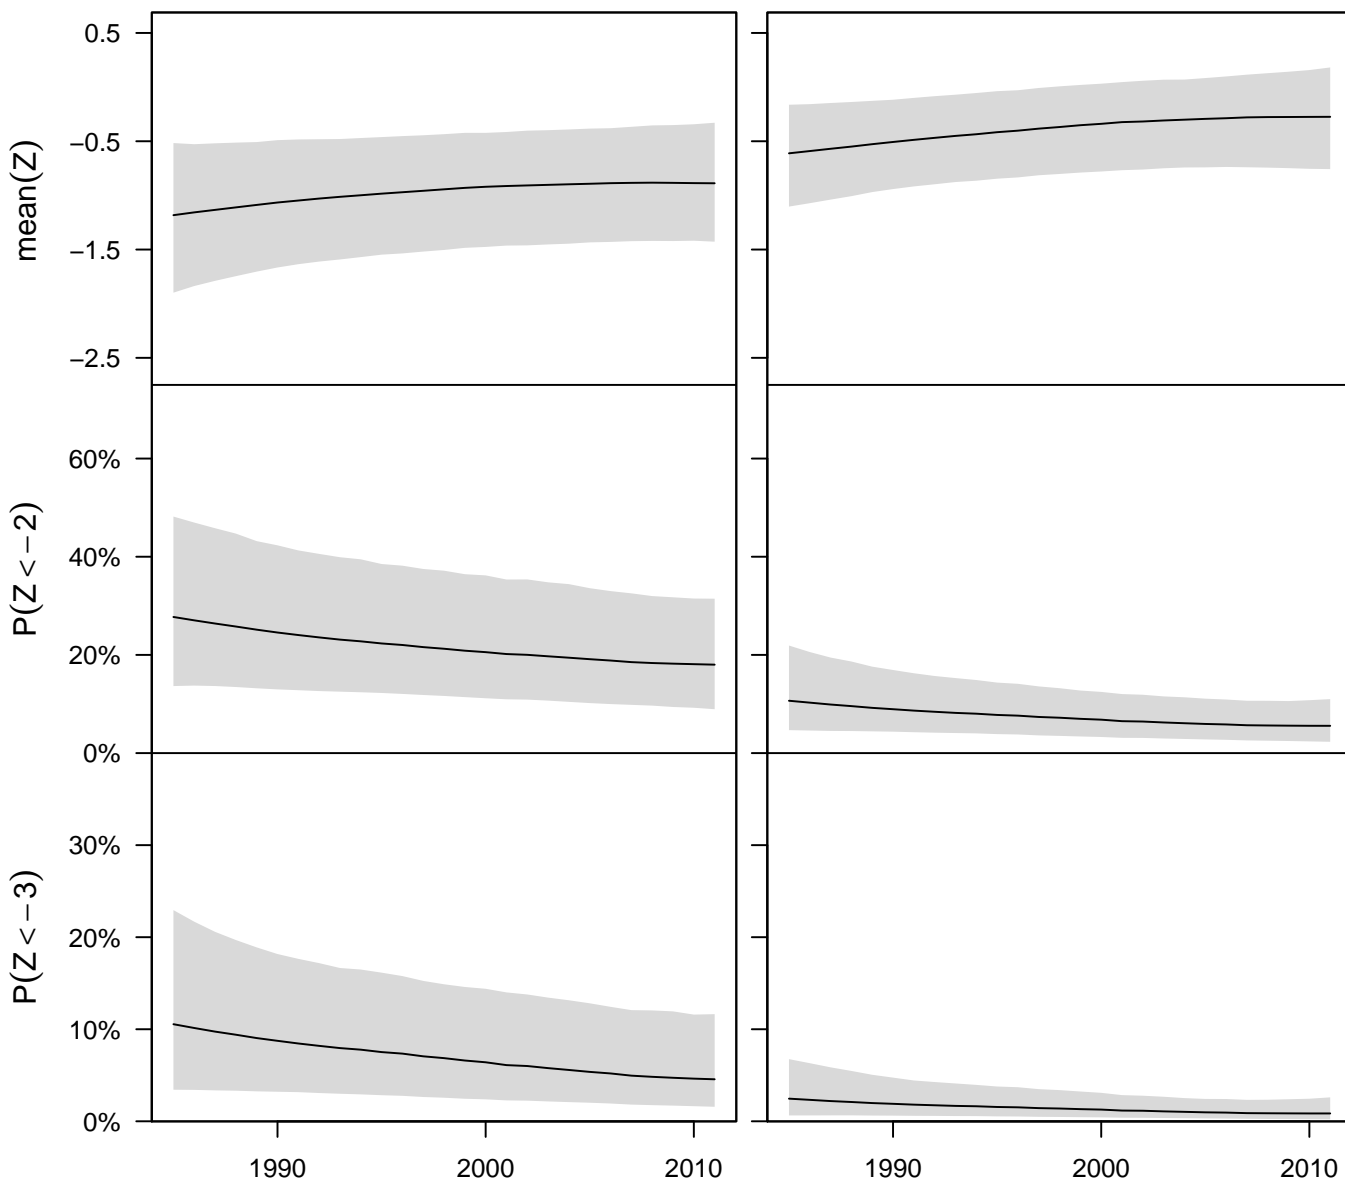

# Saint Vincent and the Grenadines

Andean and Central Latin America and Caribbean Region

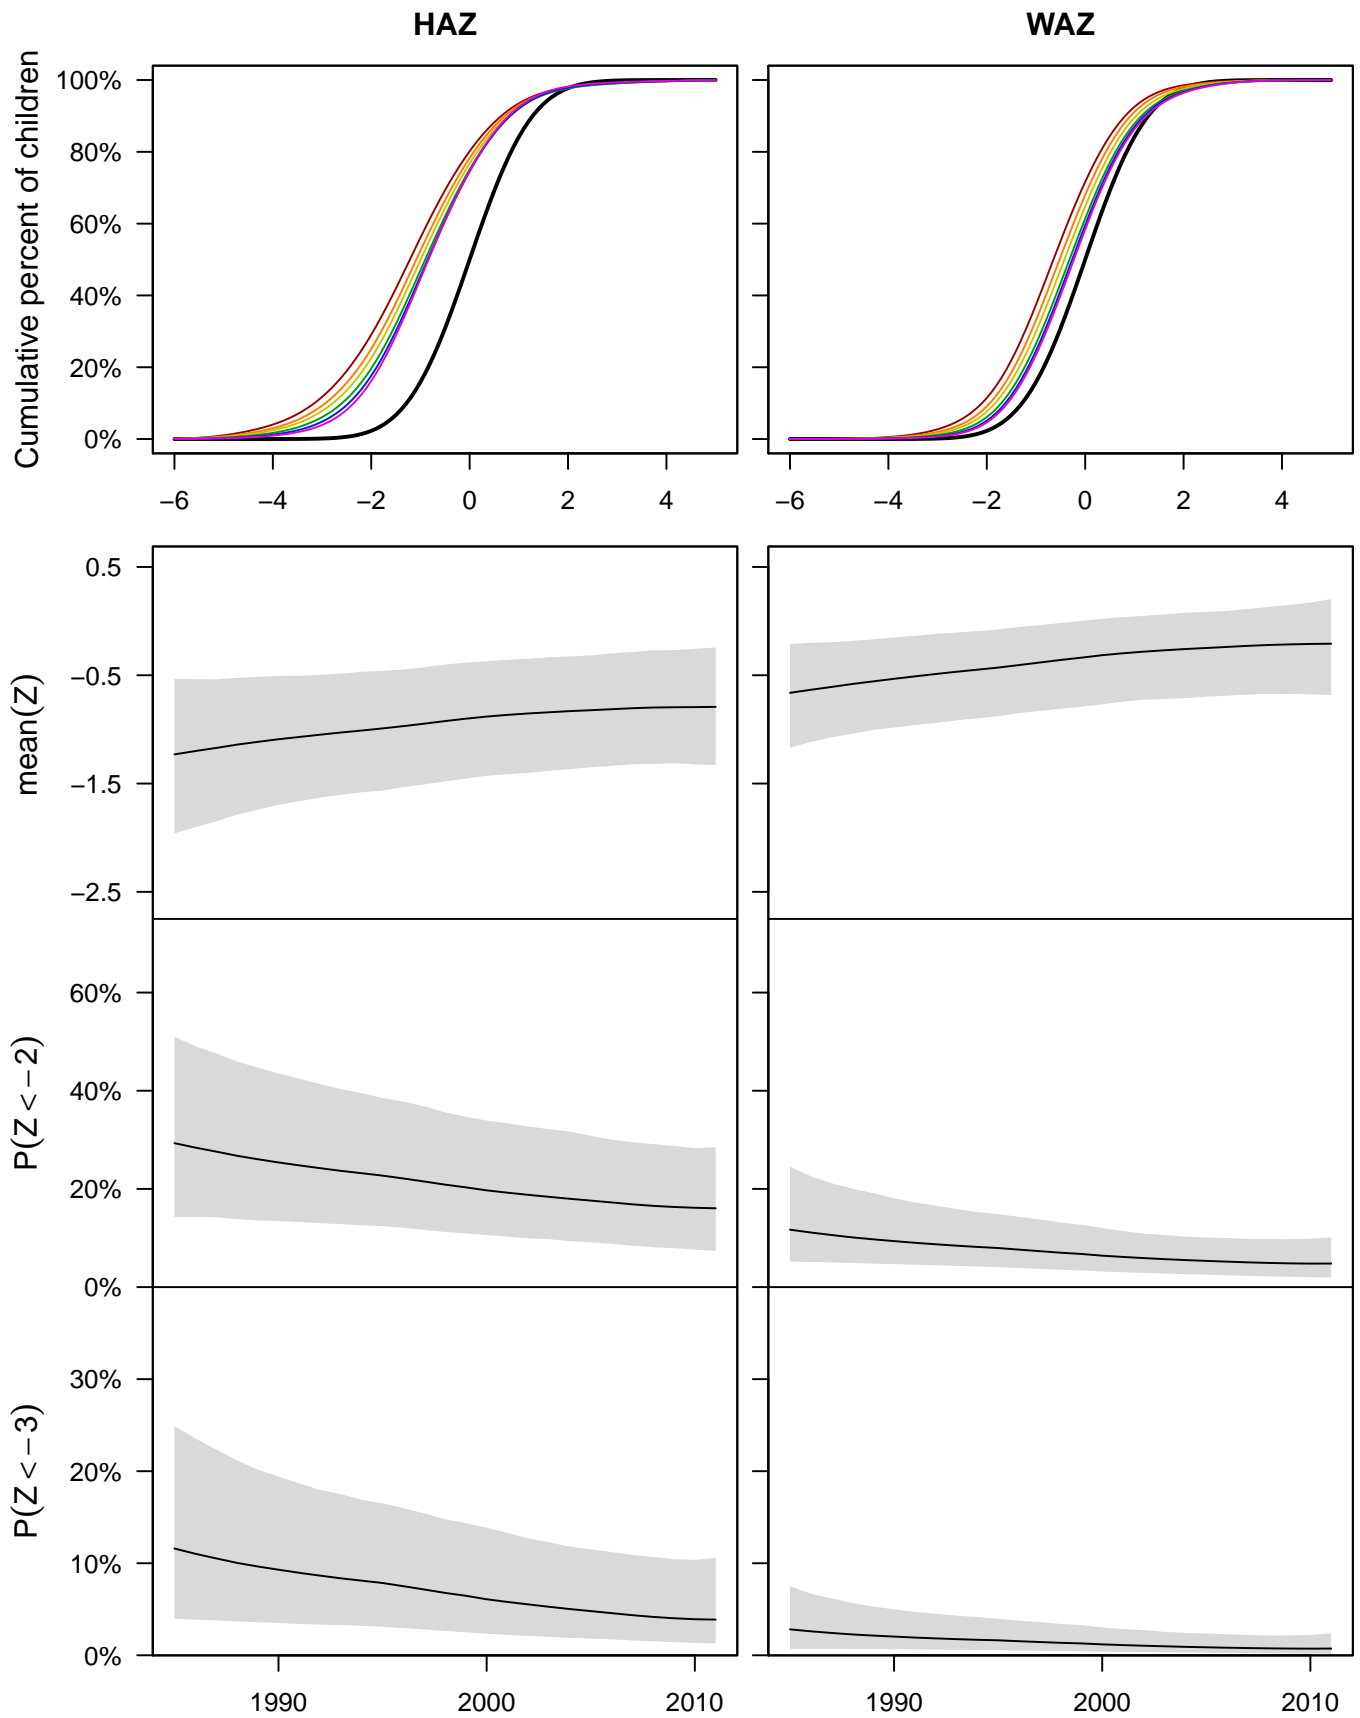

# Samoa

Oceania Region

## HAZ

## WAZ

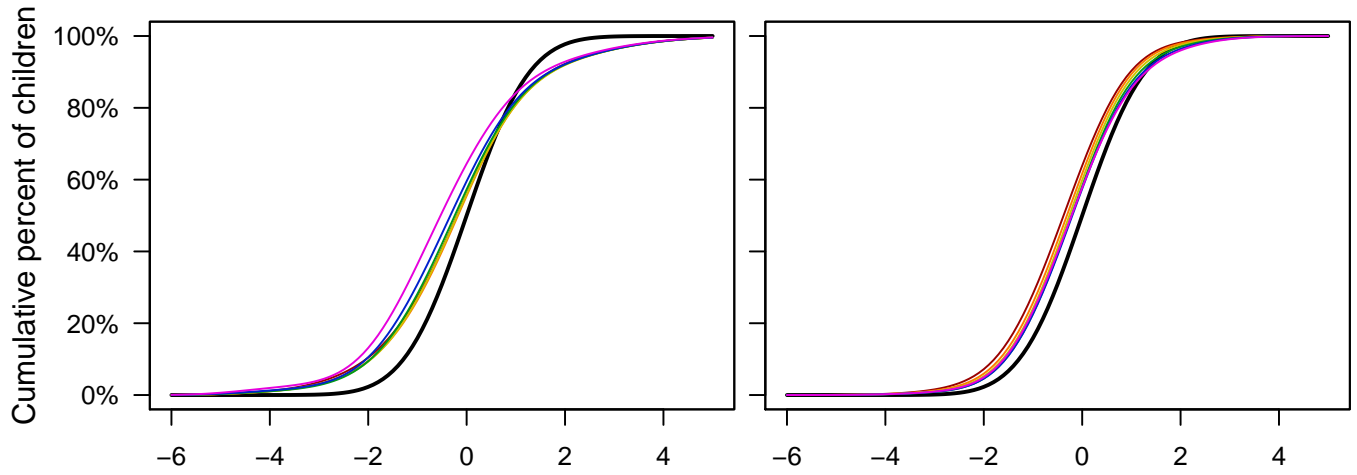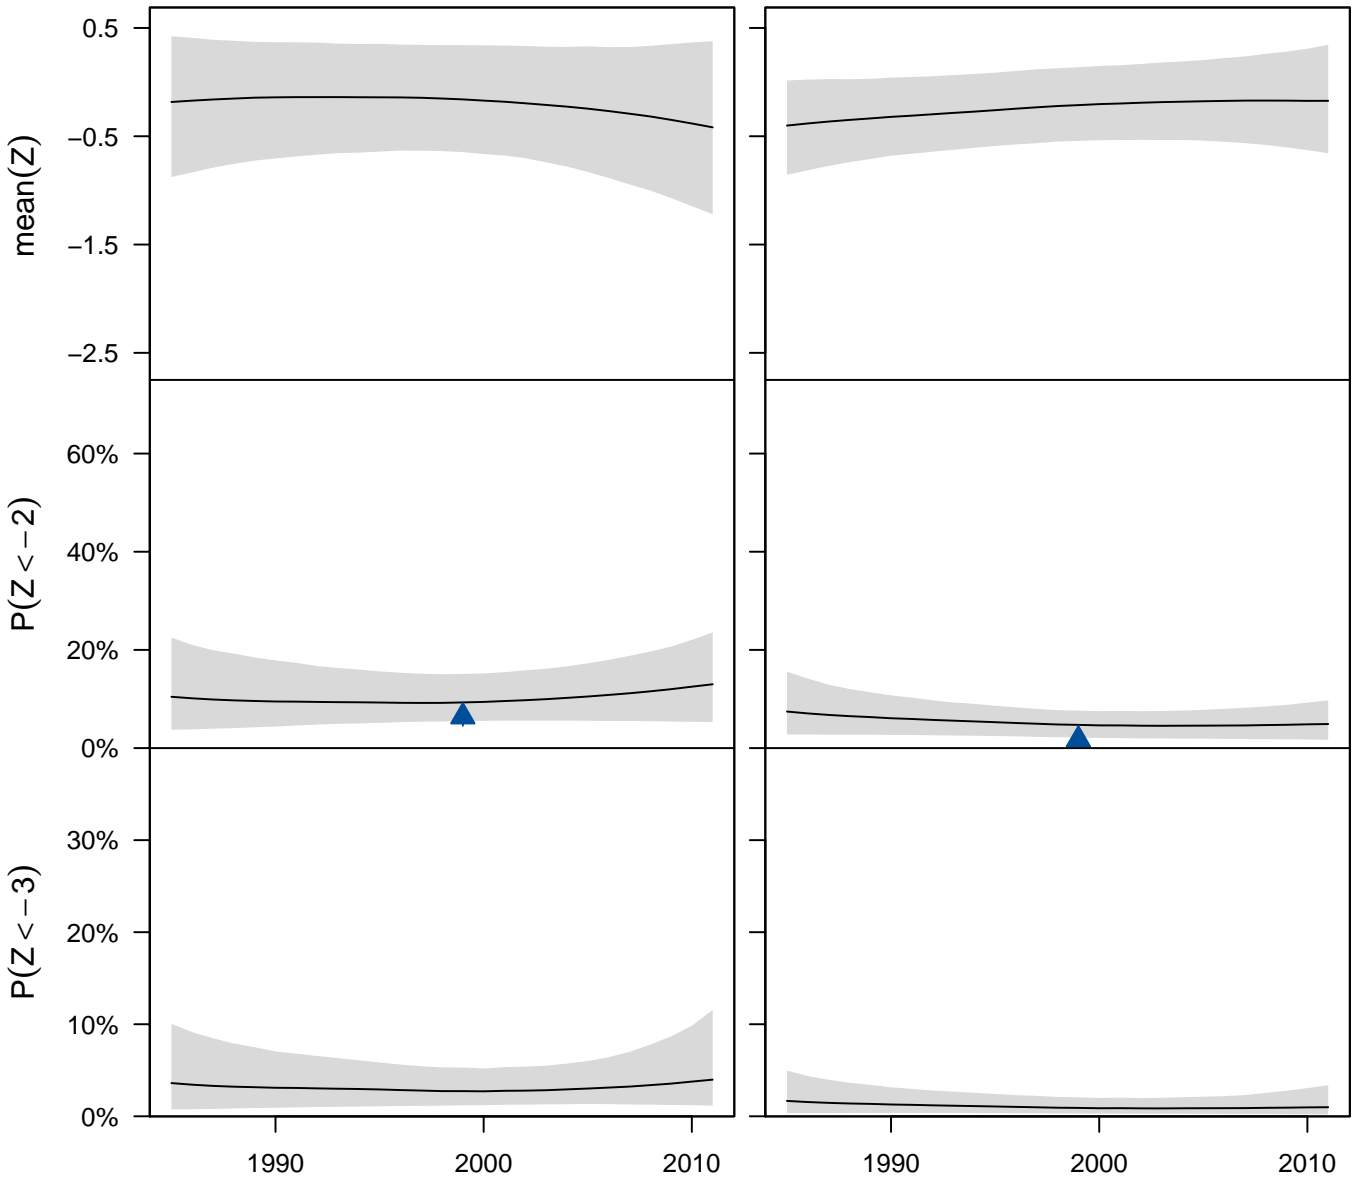

# São Tomé and Príncipe

Sub-Saharan Africa Region

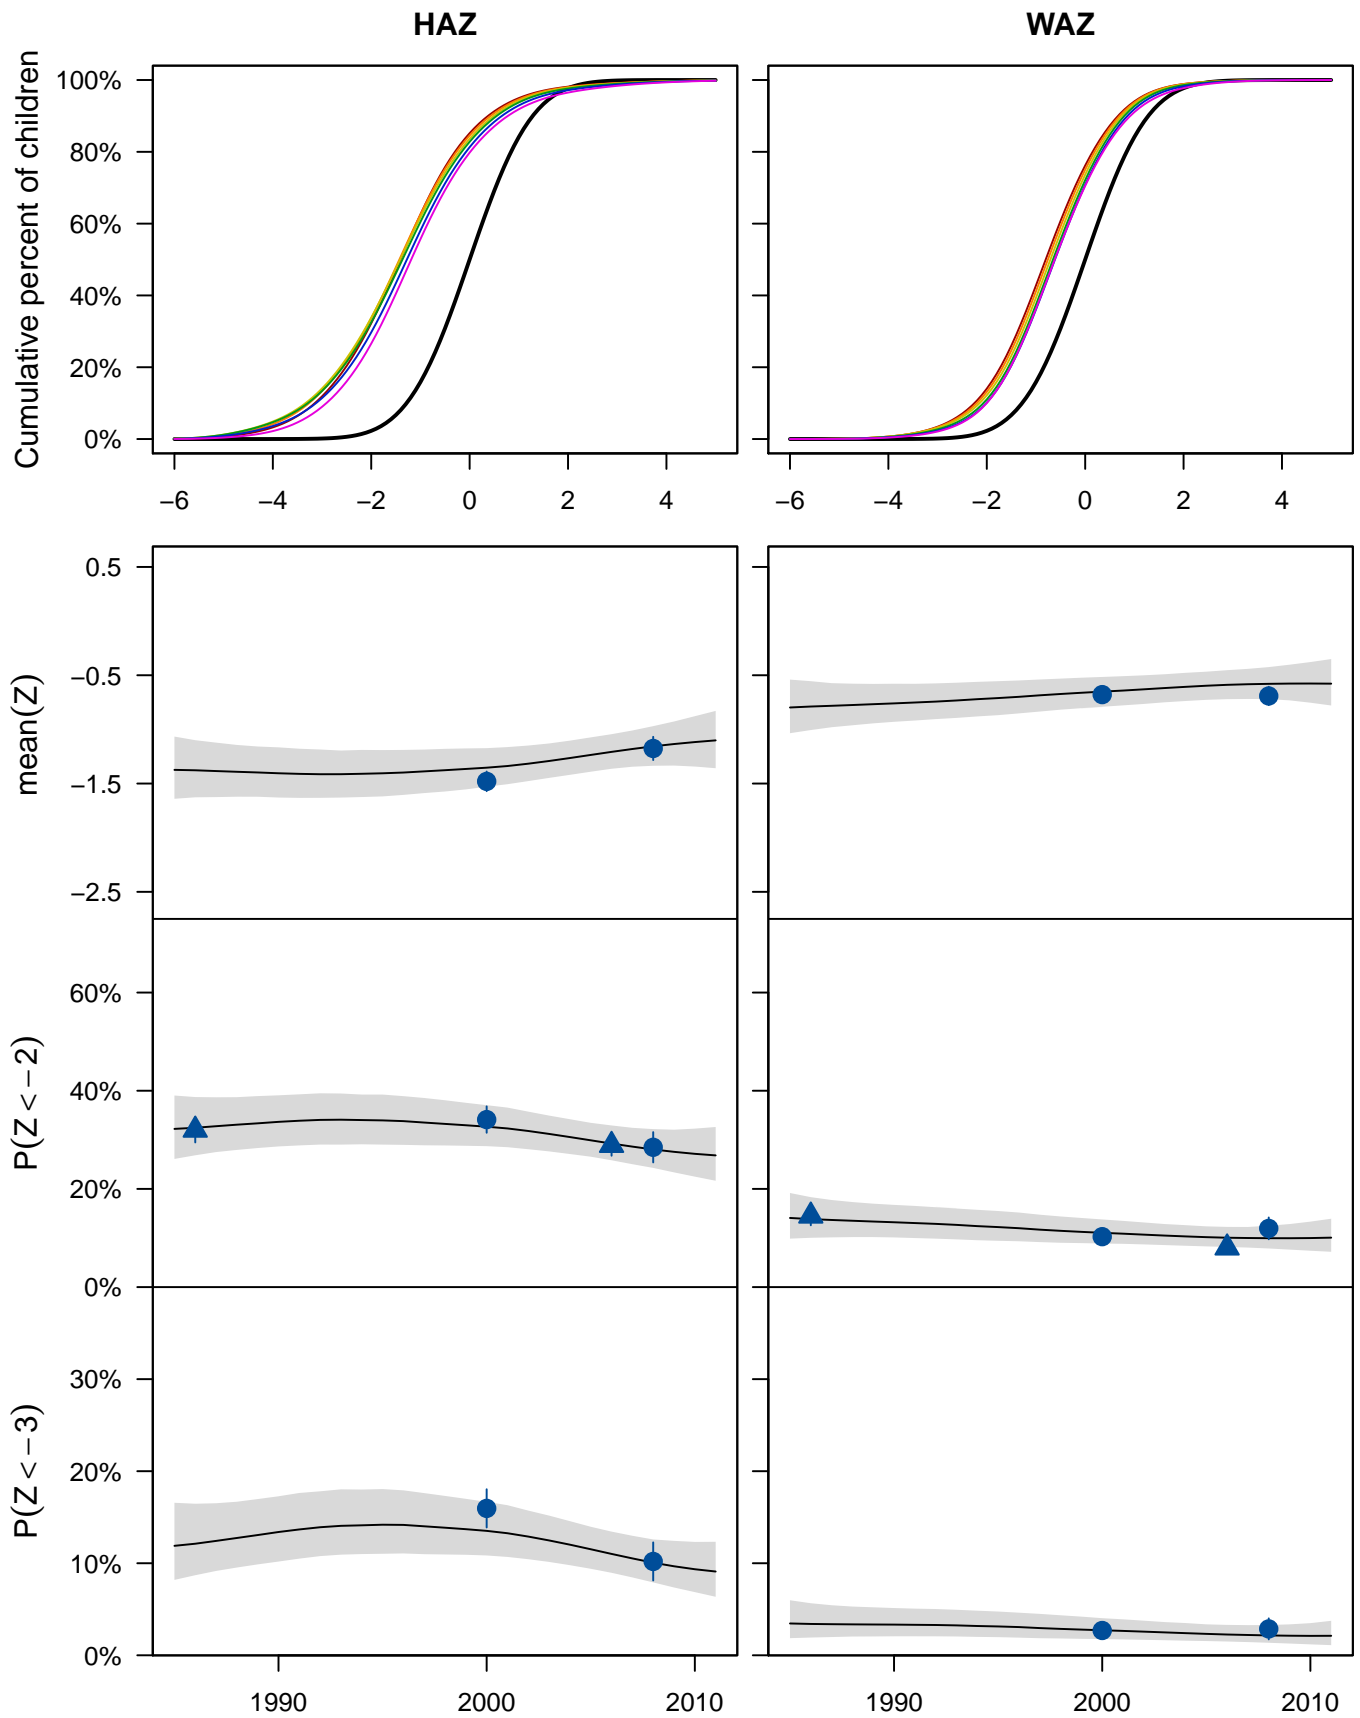

# Saudi Arabia

Central Asia, Middle East, and North Africa Region

HAZ

WAZ

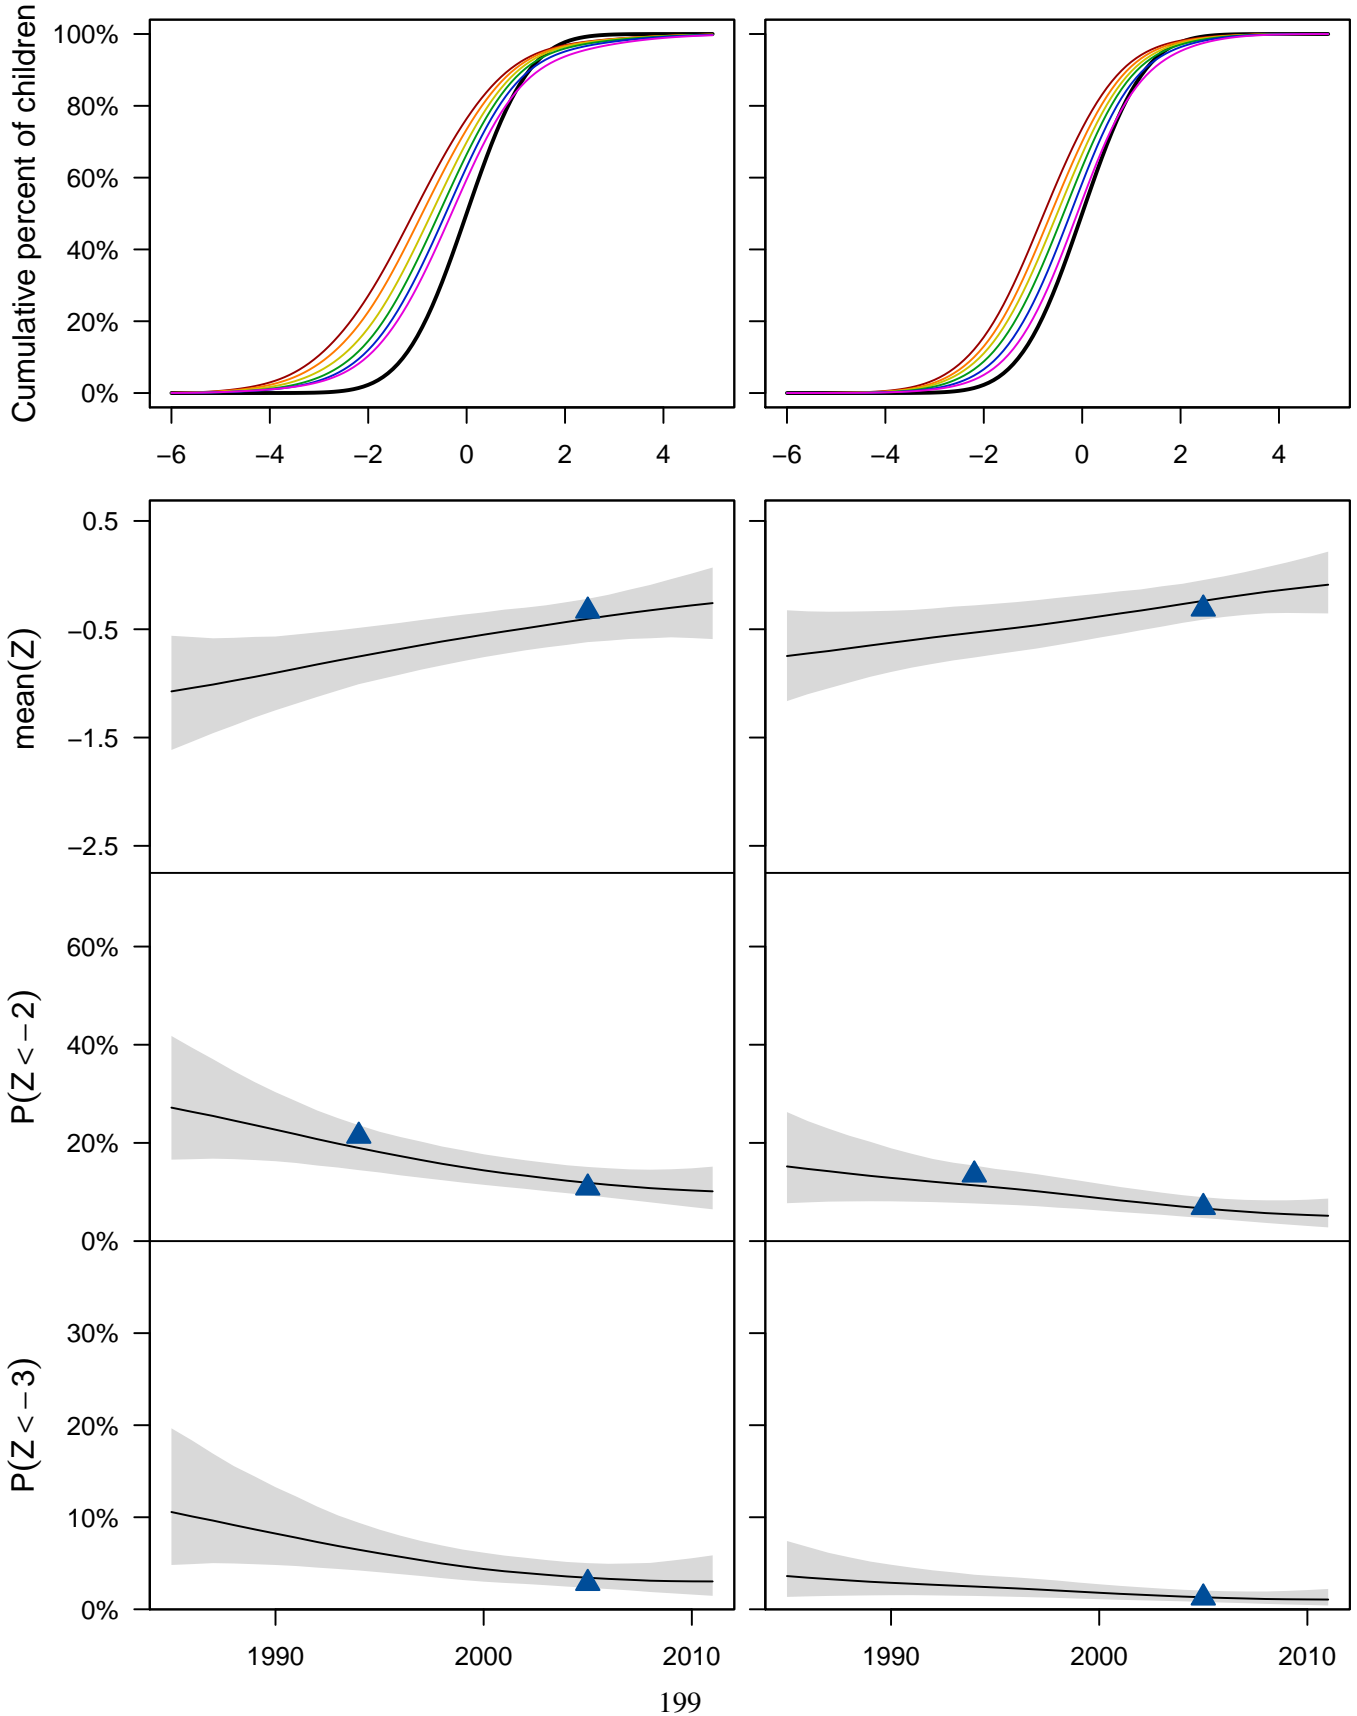



# Senegal

Sub-Saharan Africa Region

HAZ

WAZ

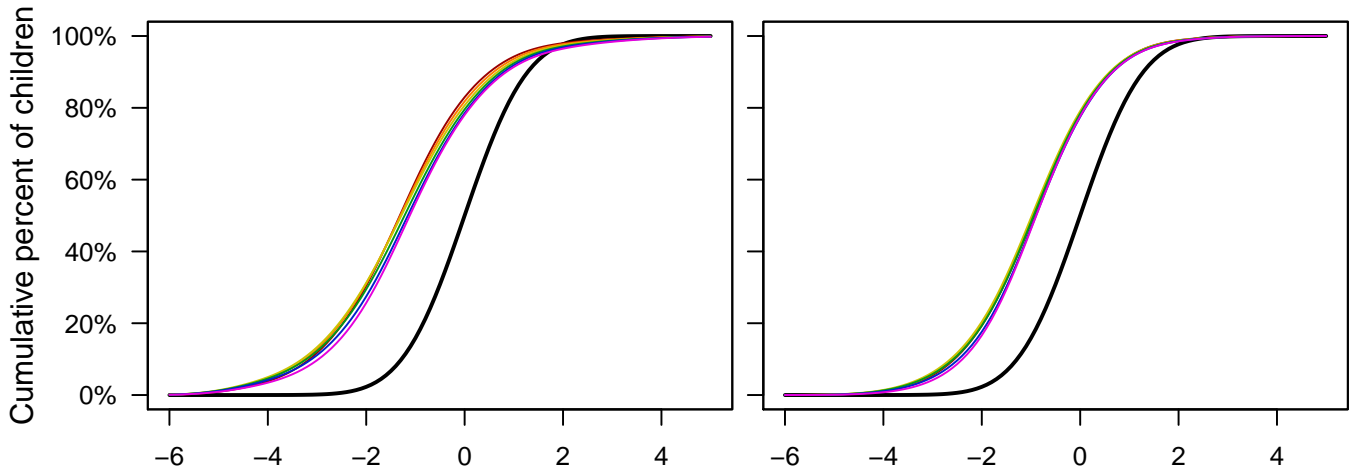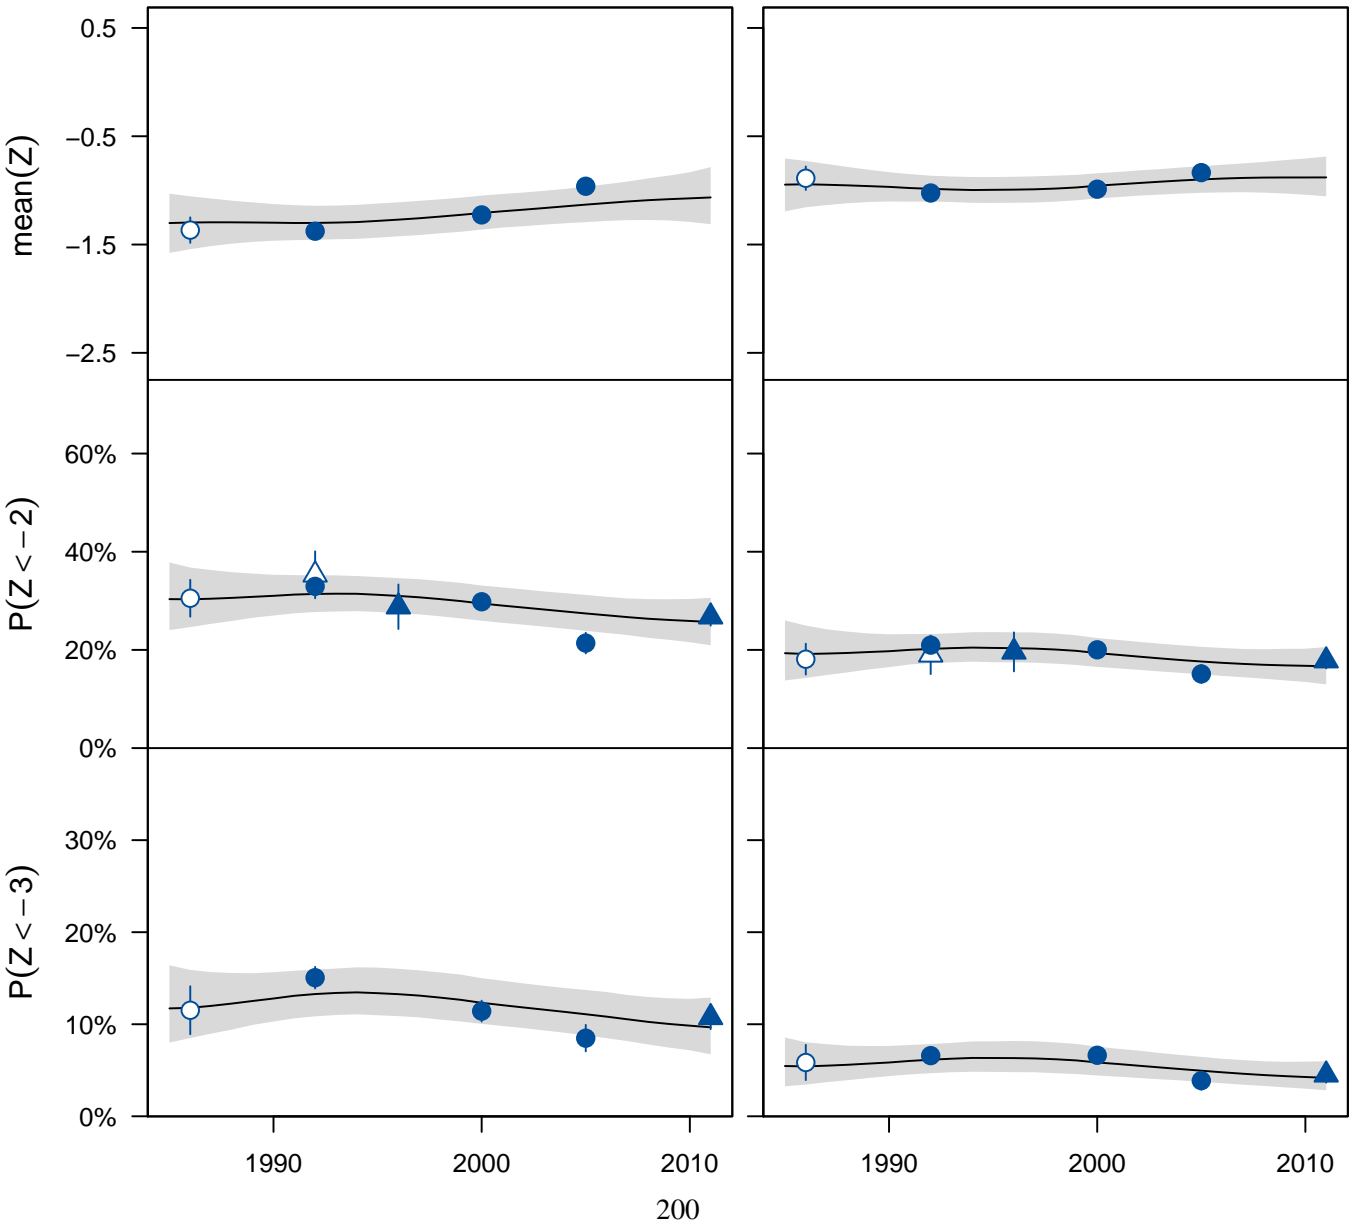

# Seychelles

Sub-Saharan Africa Region

HAZ

WAZ

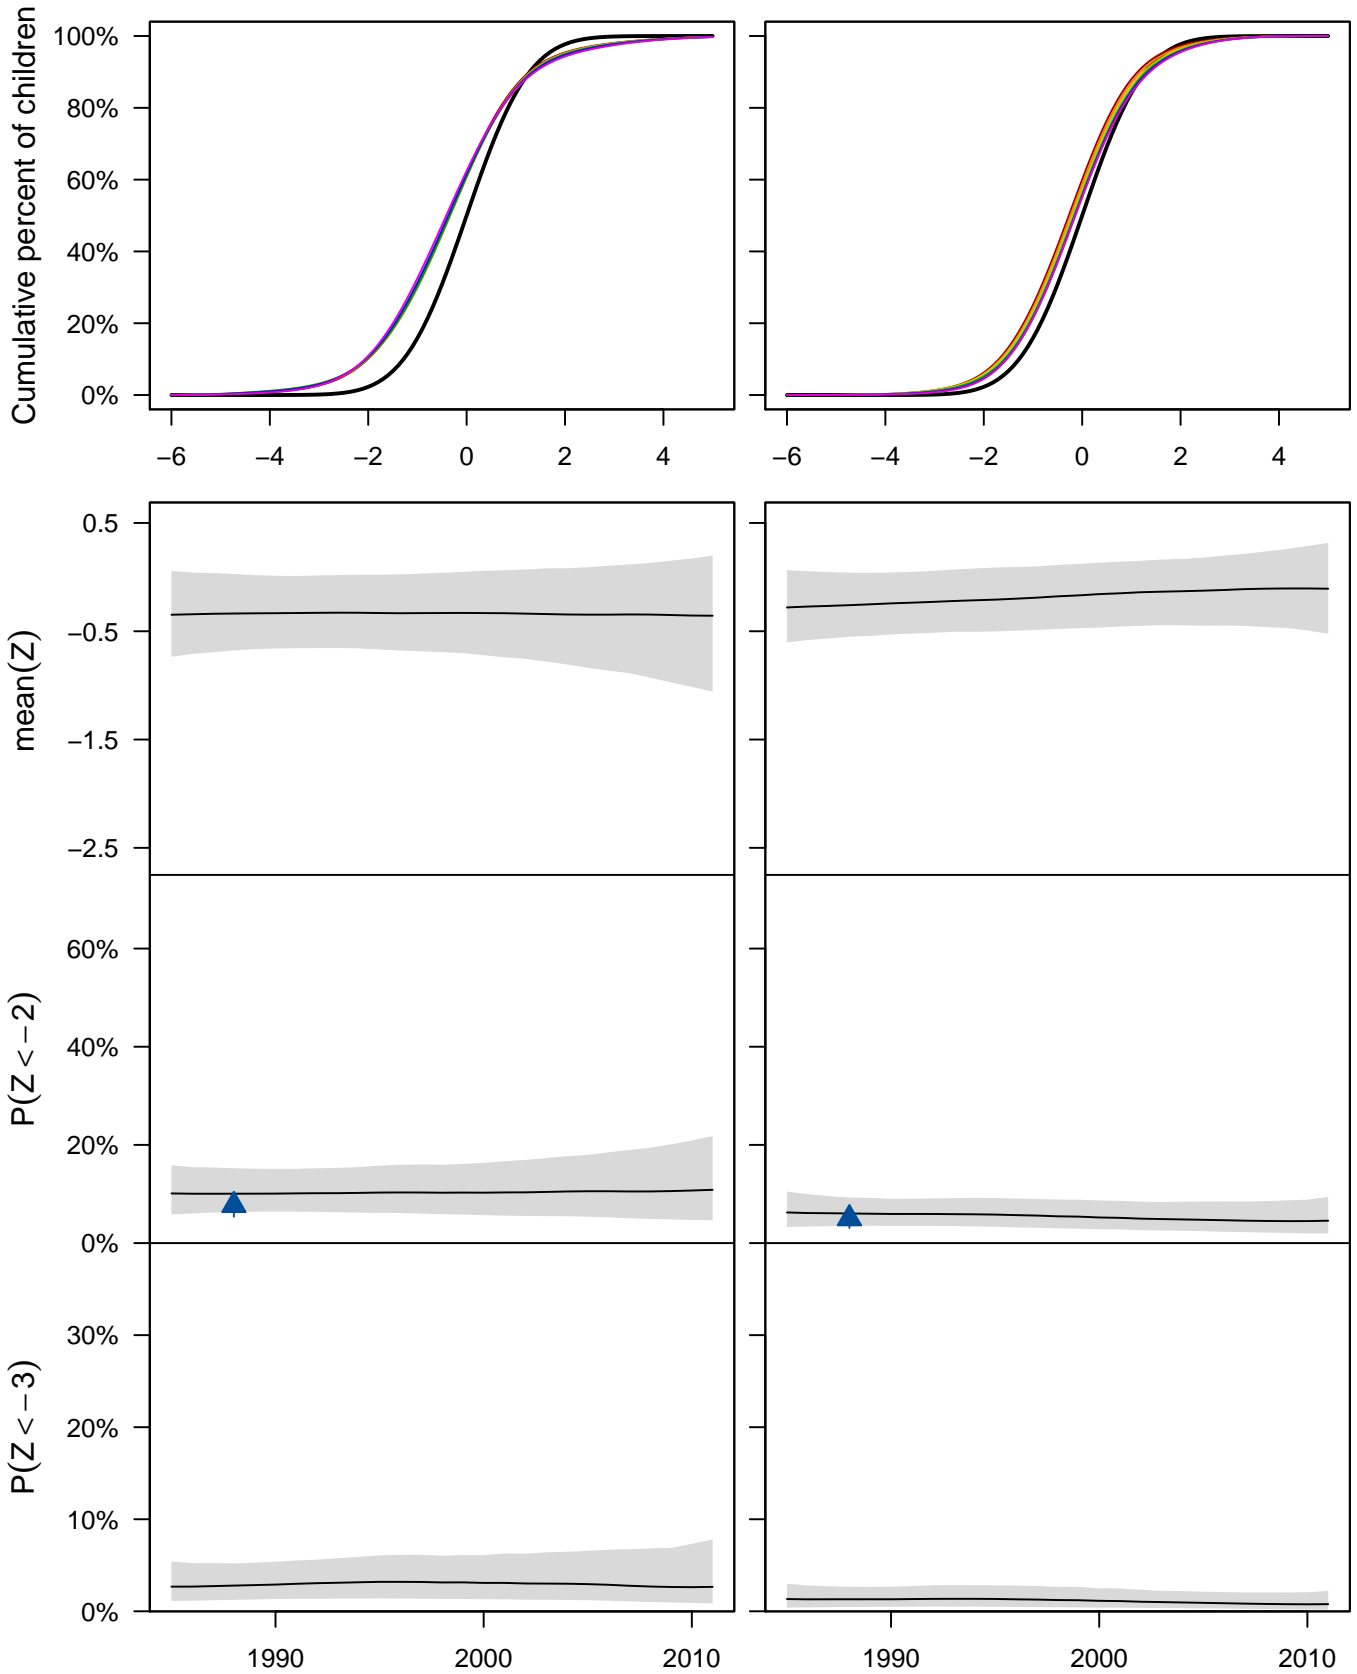

# Sierra Leone

## Sub-Saharan Africa Region

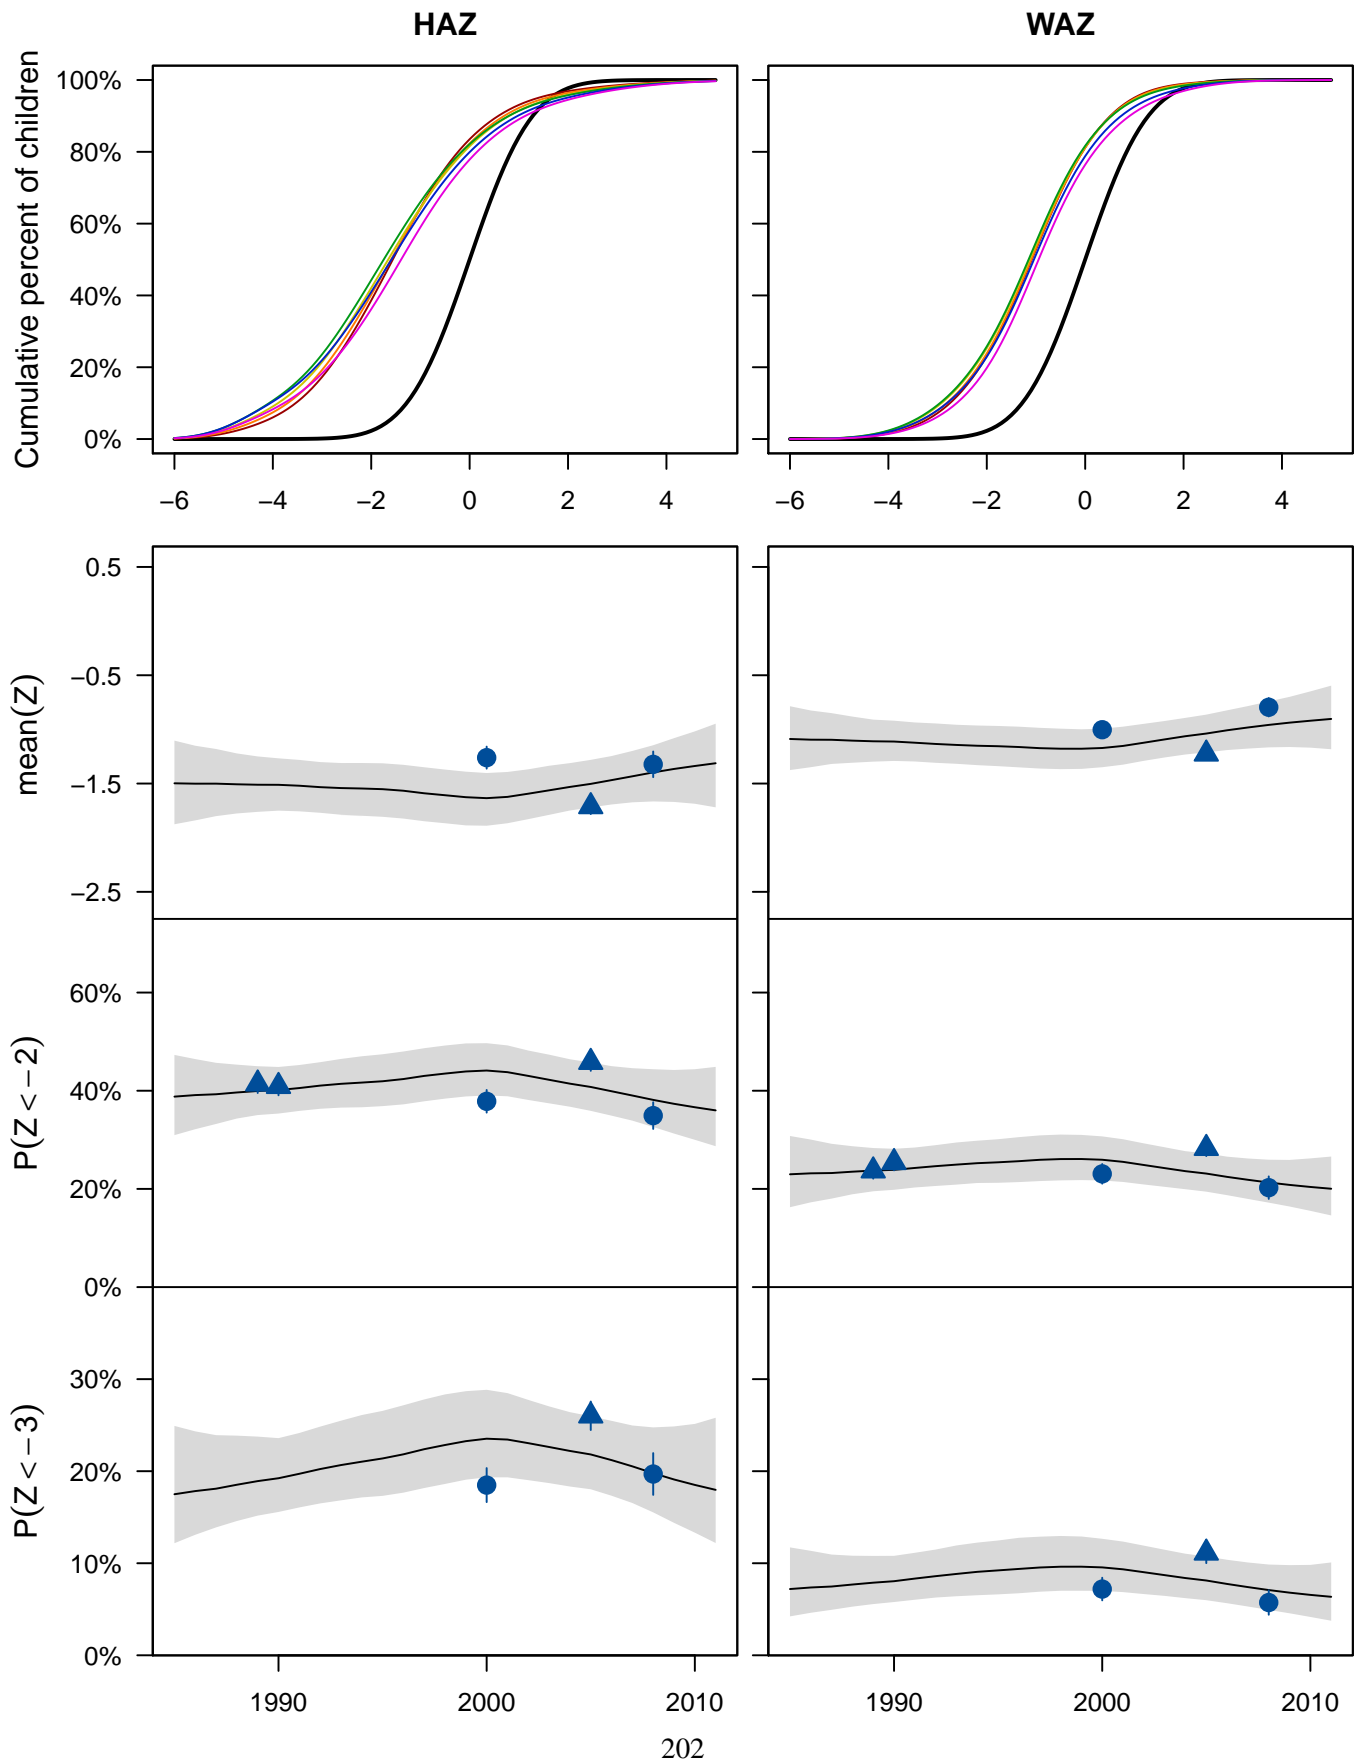

# Solomon Islands

Oceania Region

HAZ

WAZ

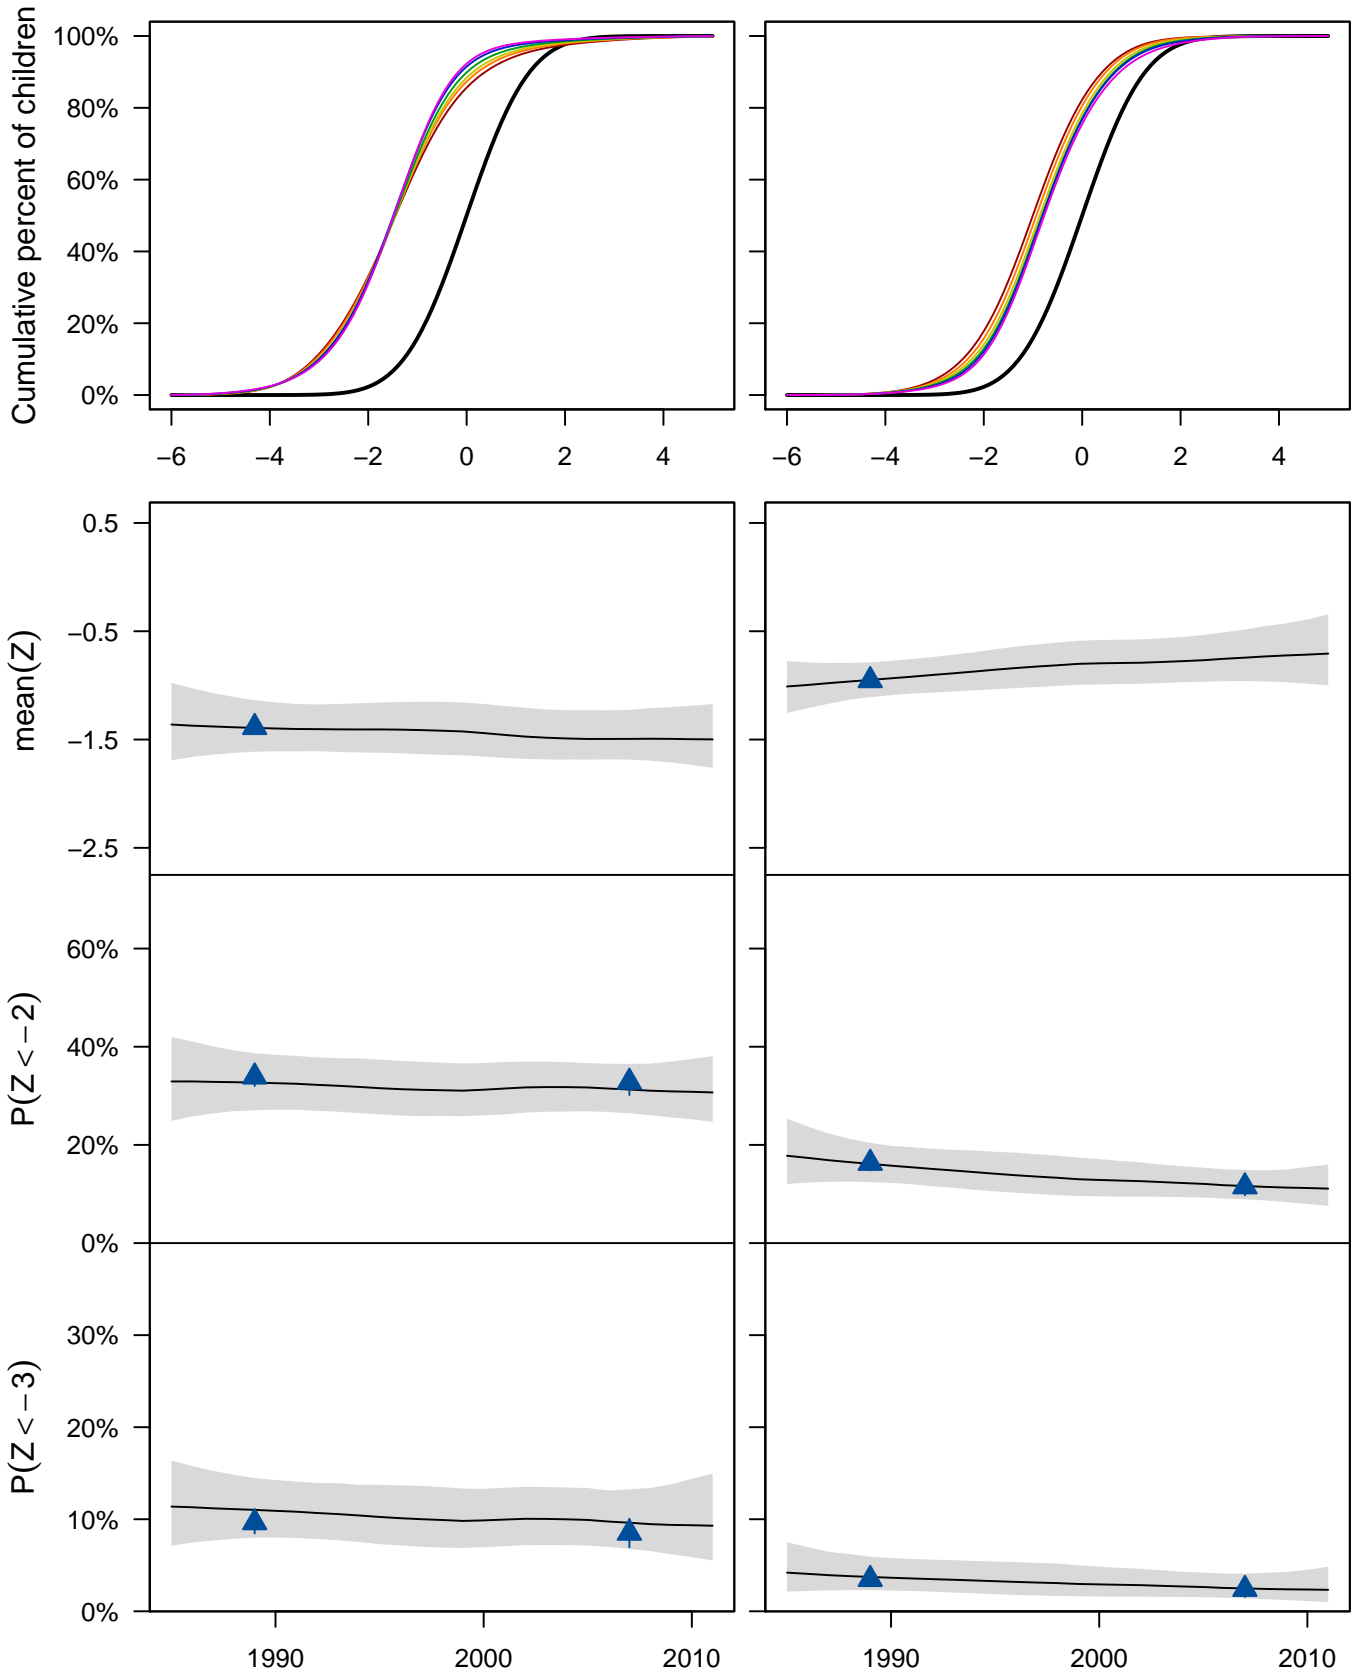

# Somalia

Sub-Saharan Africa Region

HAZ

WAZ

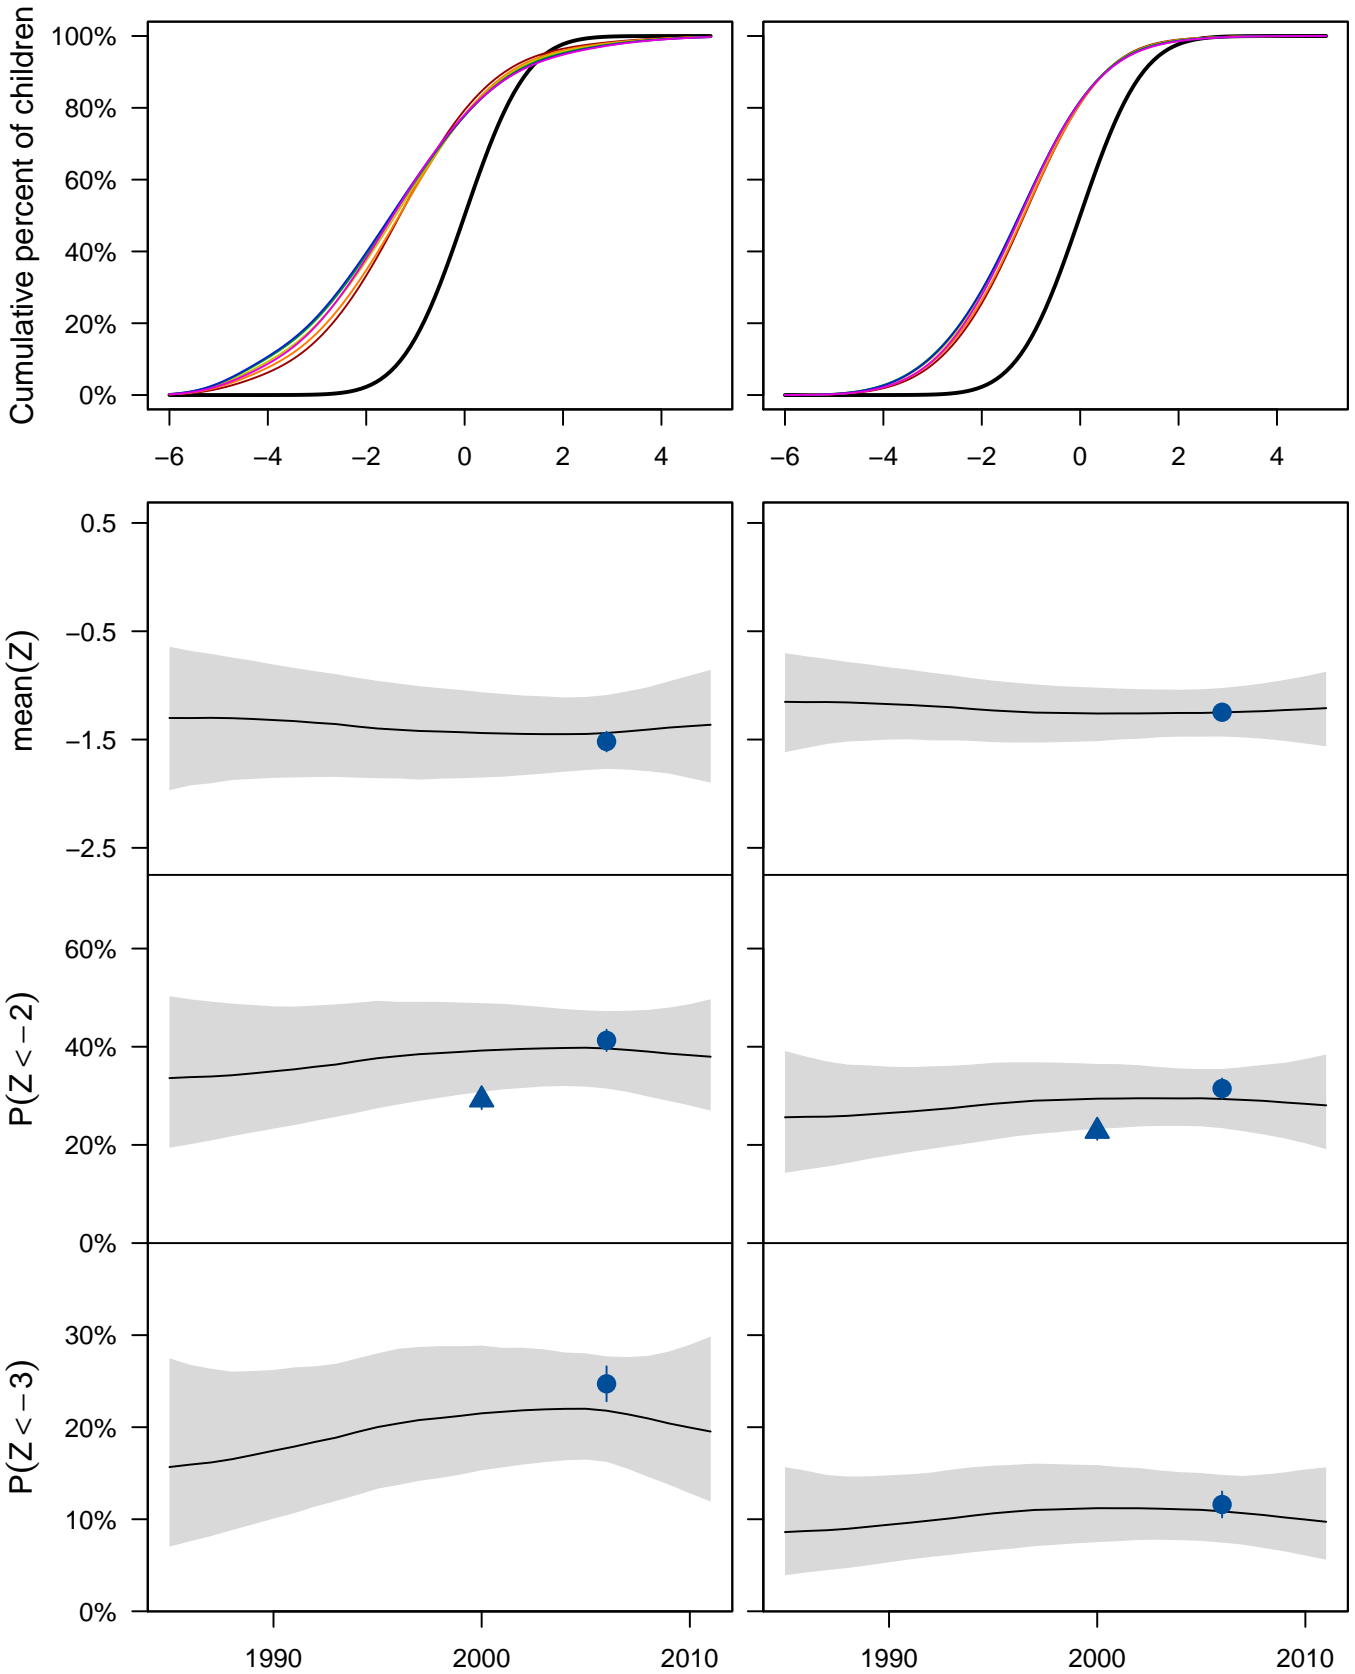

# South Africa

Sub-Saharan Africa Region

HAZ

WAZ

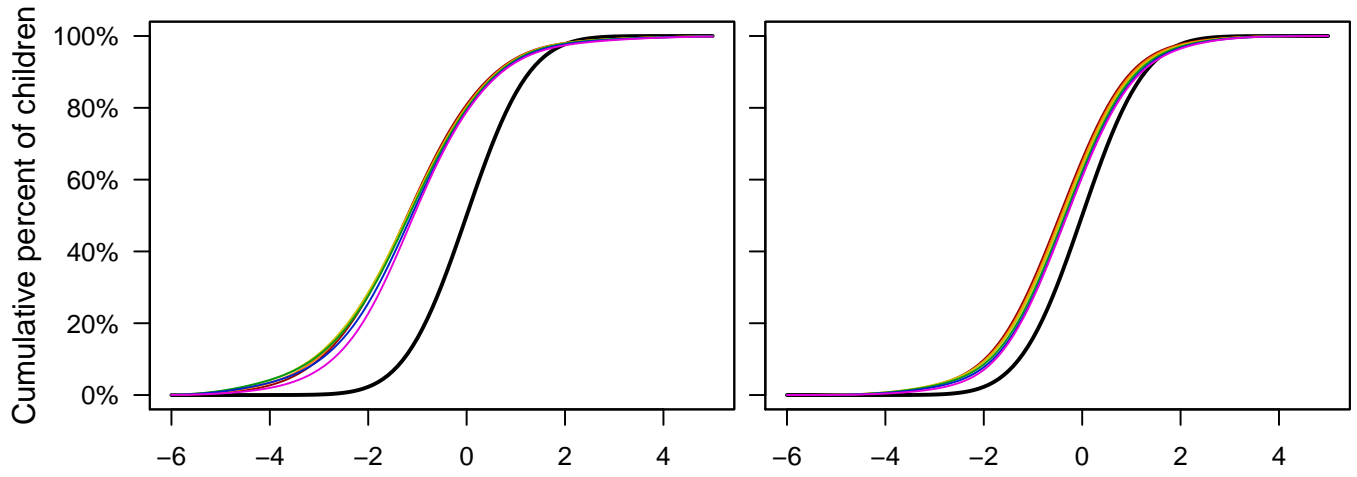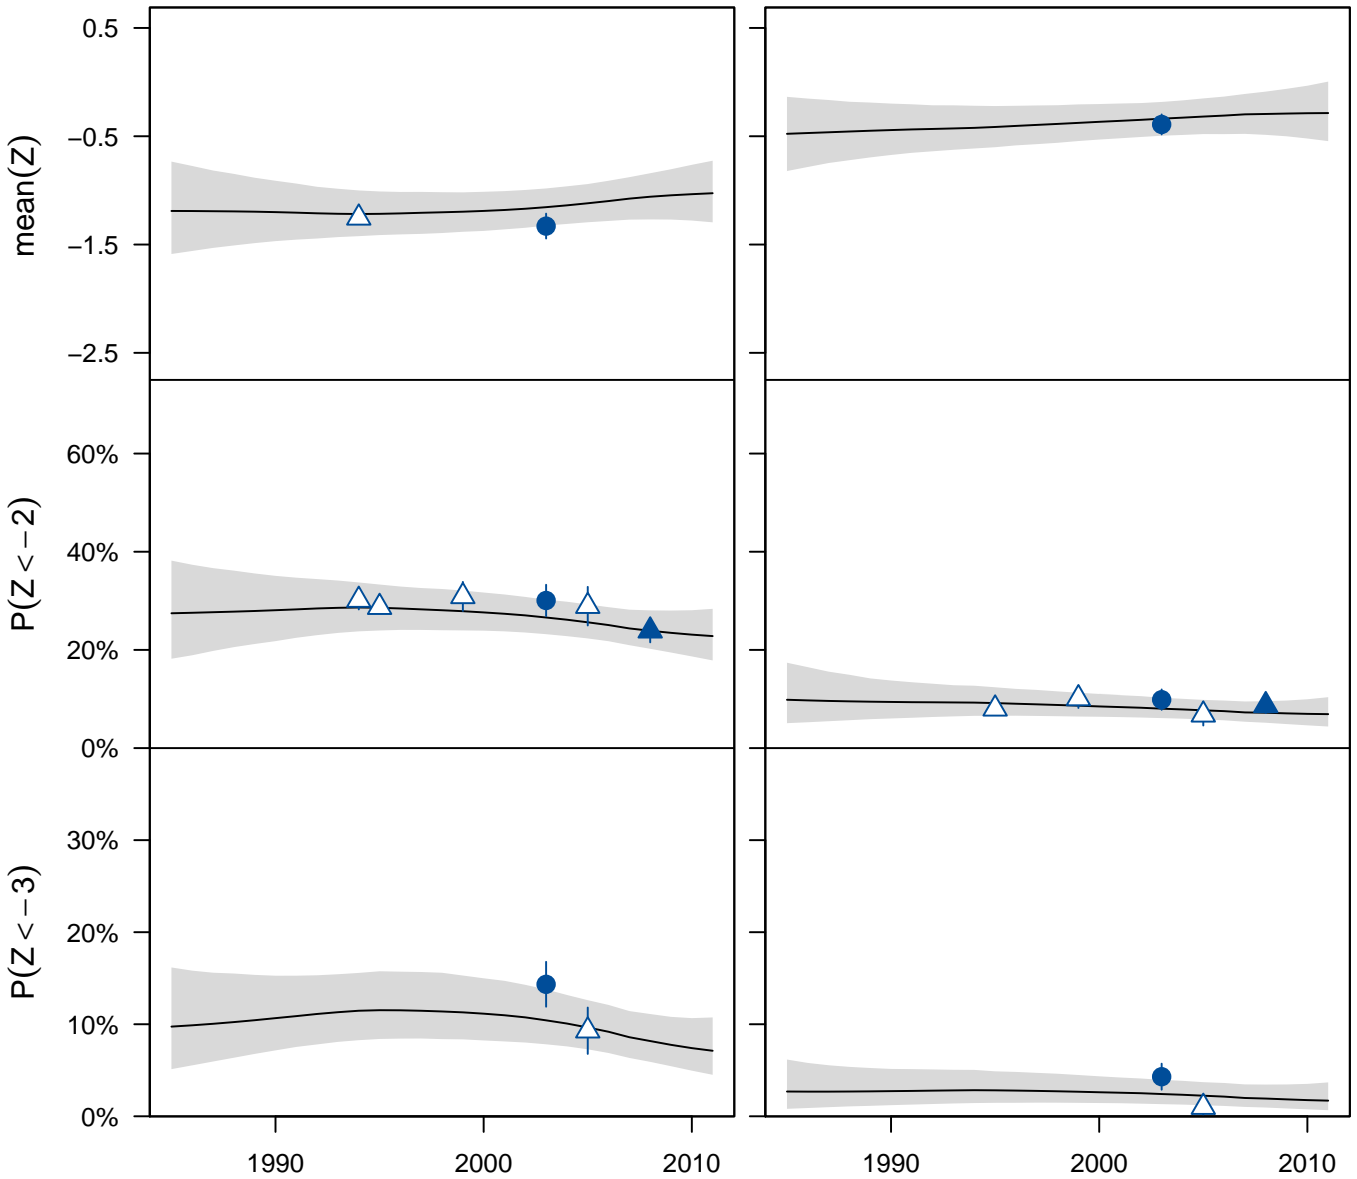

# Sri Lanka

East and Southeast Asia Region

HAZ

WAZ

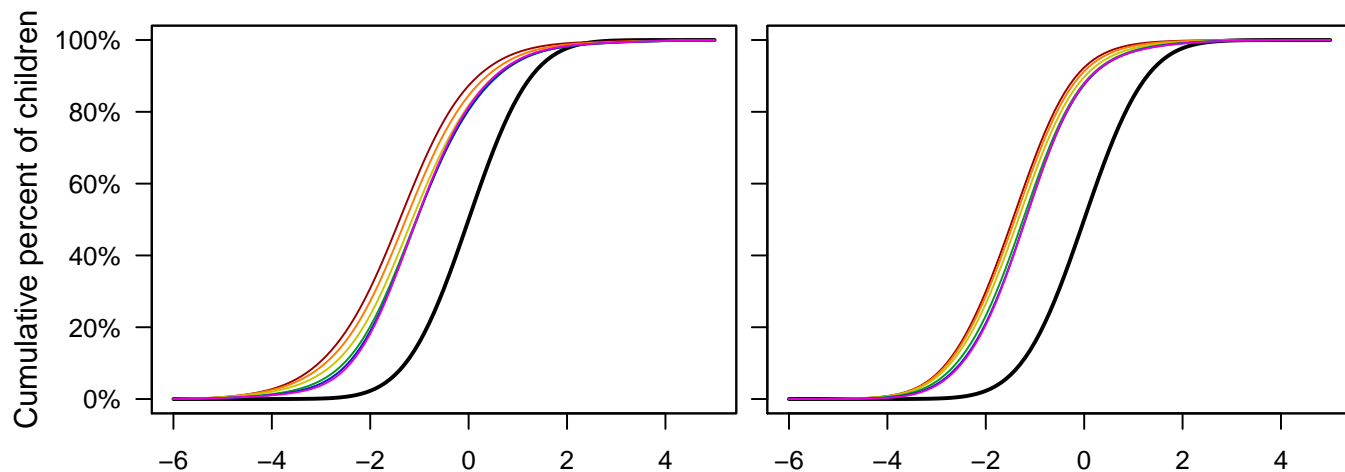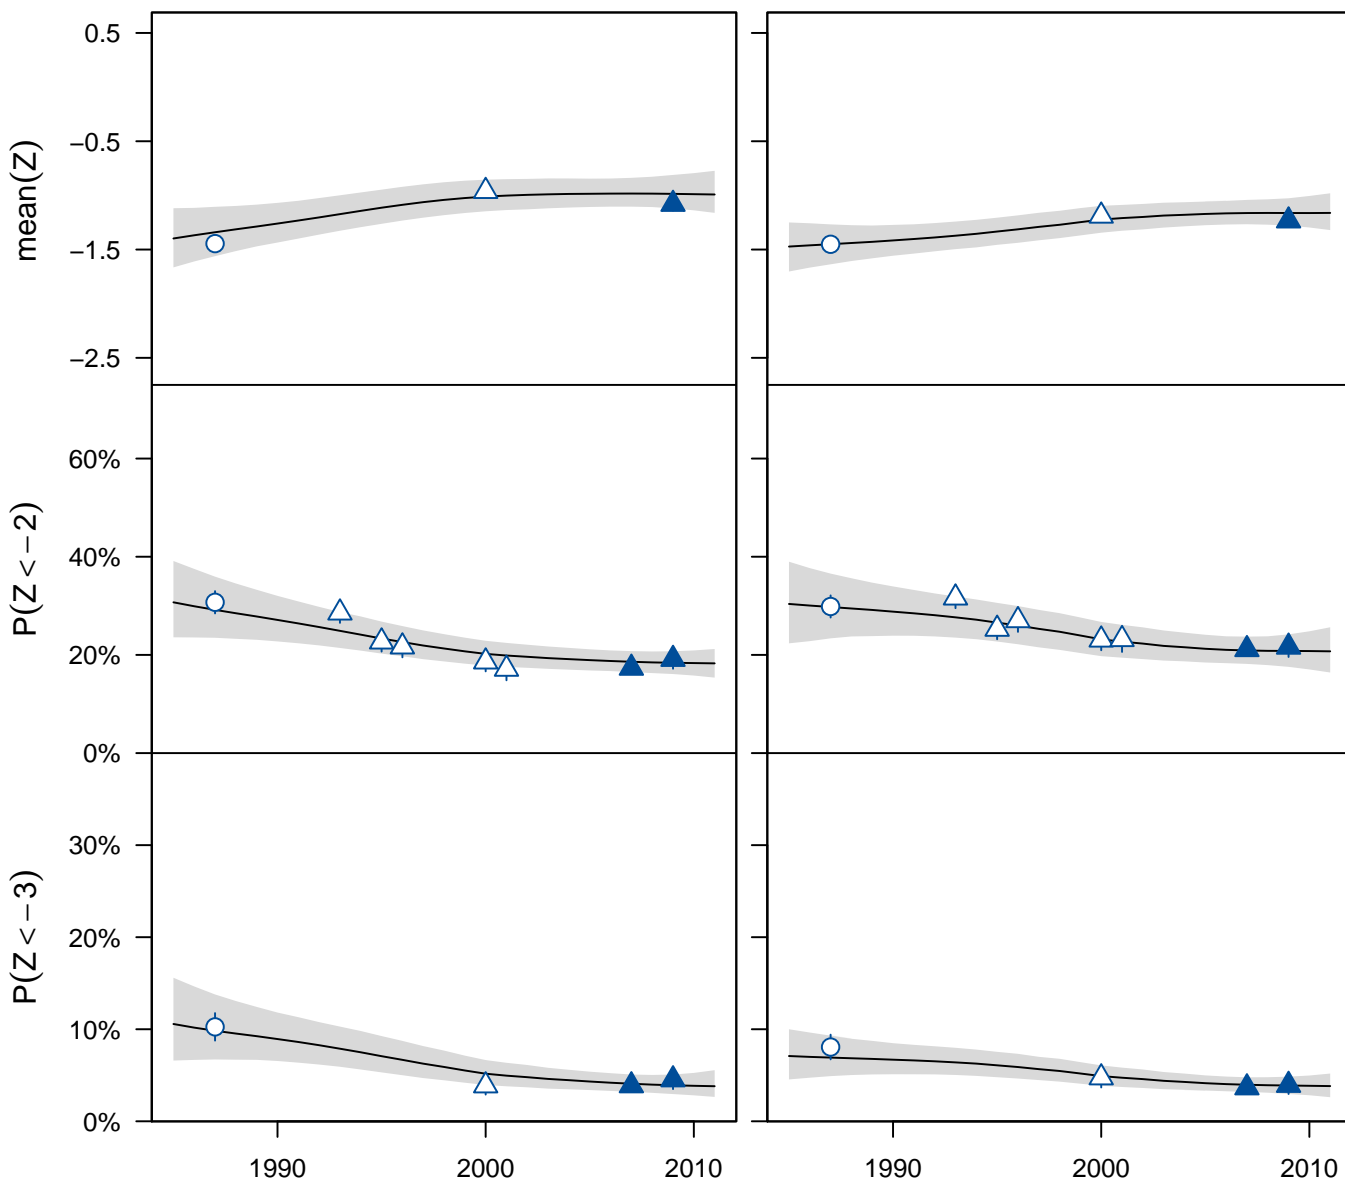

# Sudan

Sub-Saharan Africa Region

HAZ

WAZ

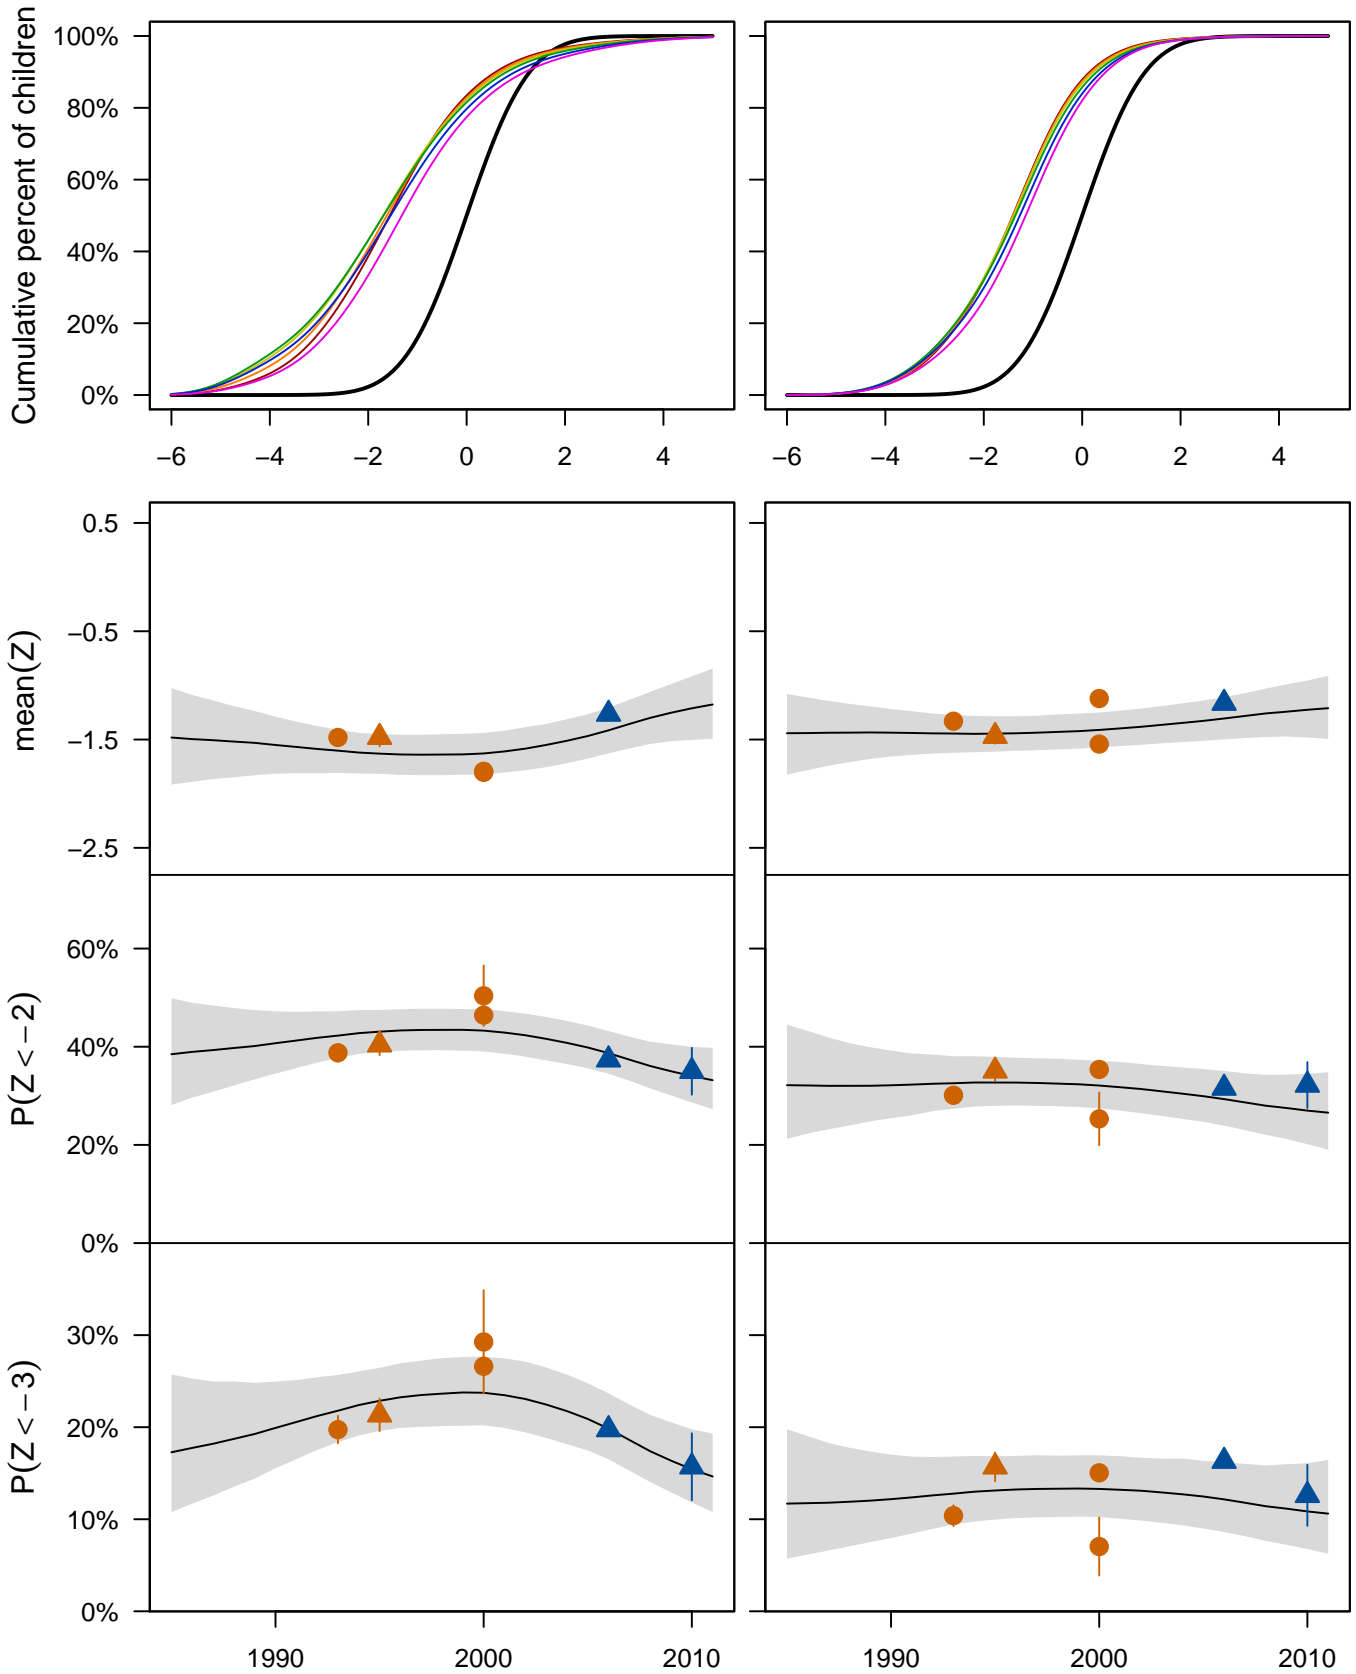



# Suriname

Andean and Central Latin America and Caribbean Region

HAZ

WAZ

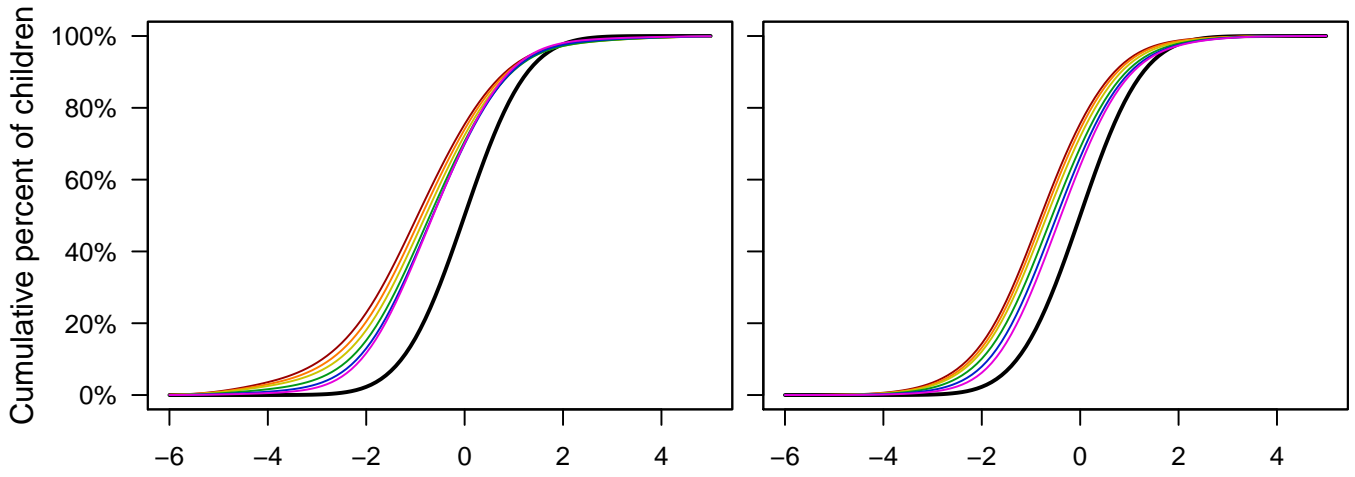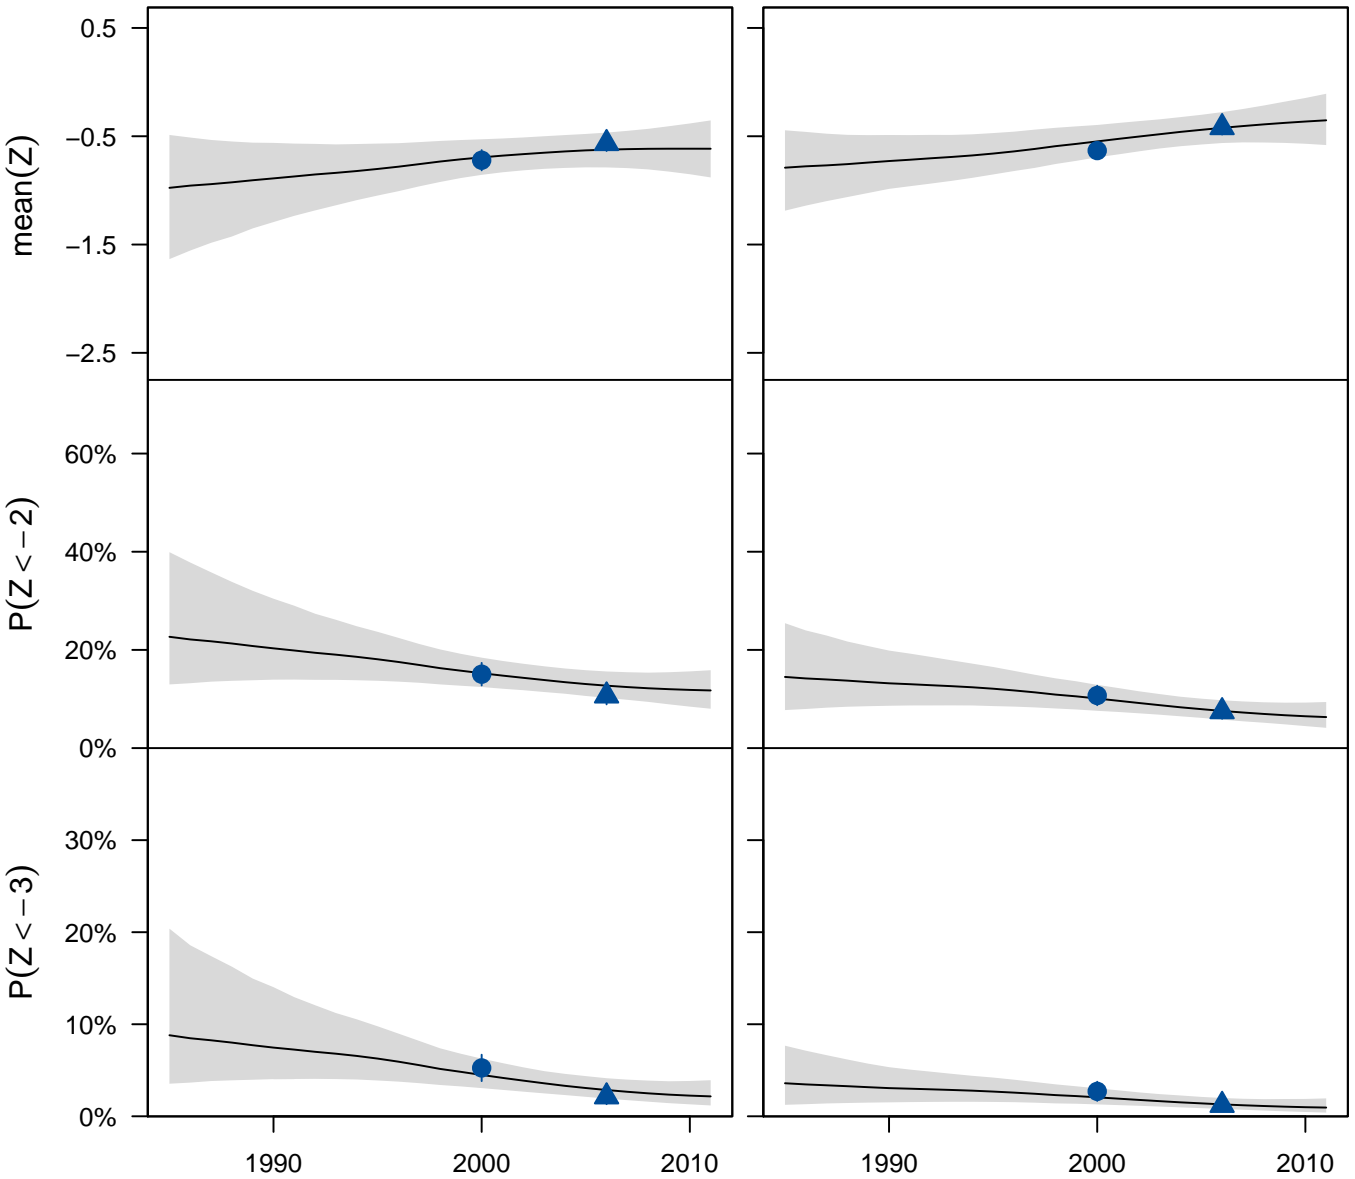

# Swaziland

Sub-Saharan Africa Region

HAZ

WAZ

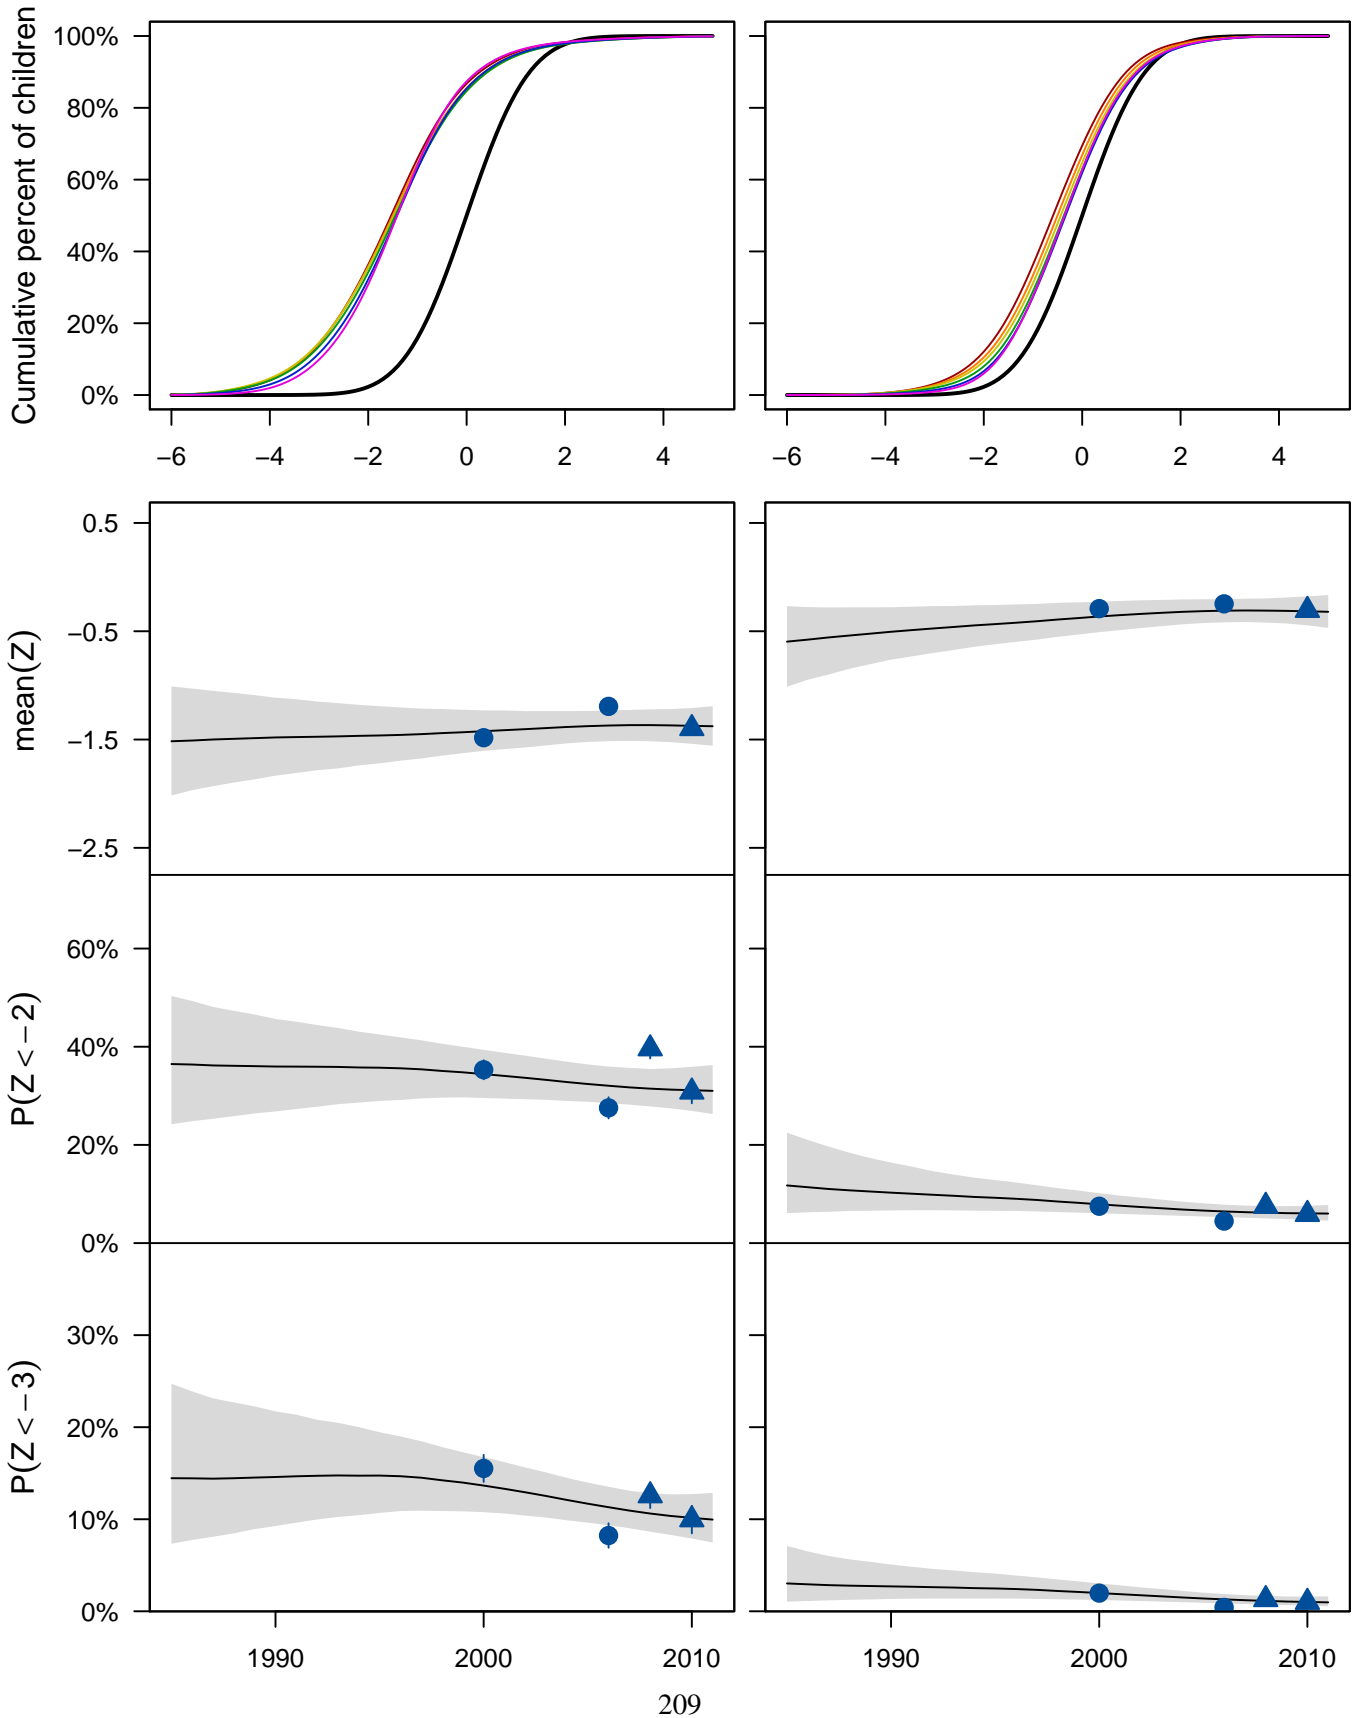

# Syrian Arab Republic

Central Asia, Middle East, and North Africa Region

HAZ

WAZ

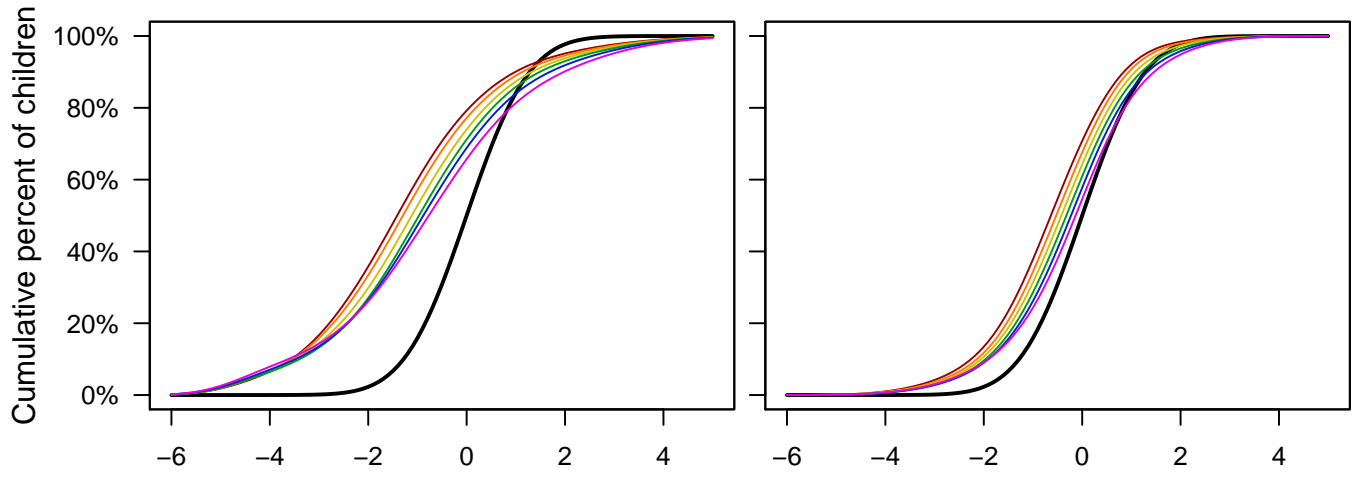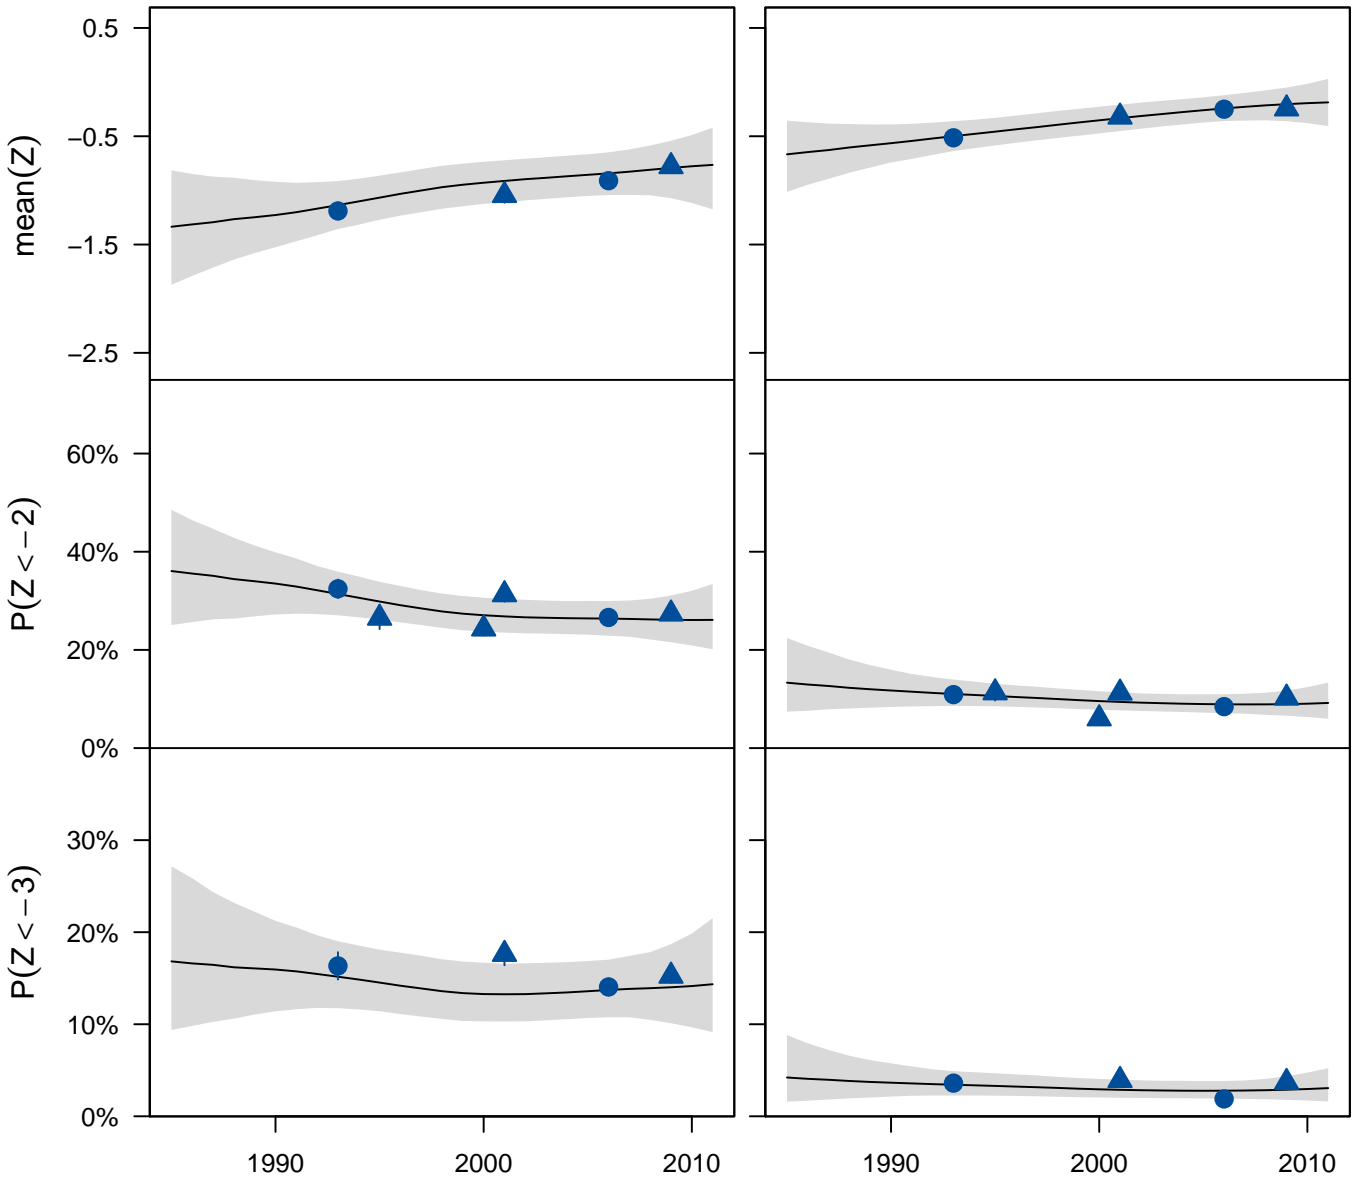

# Taiwan

East and Southeast Asia Region

HAZ

WAZ

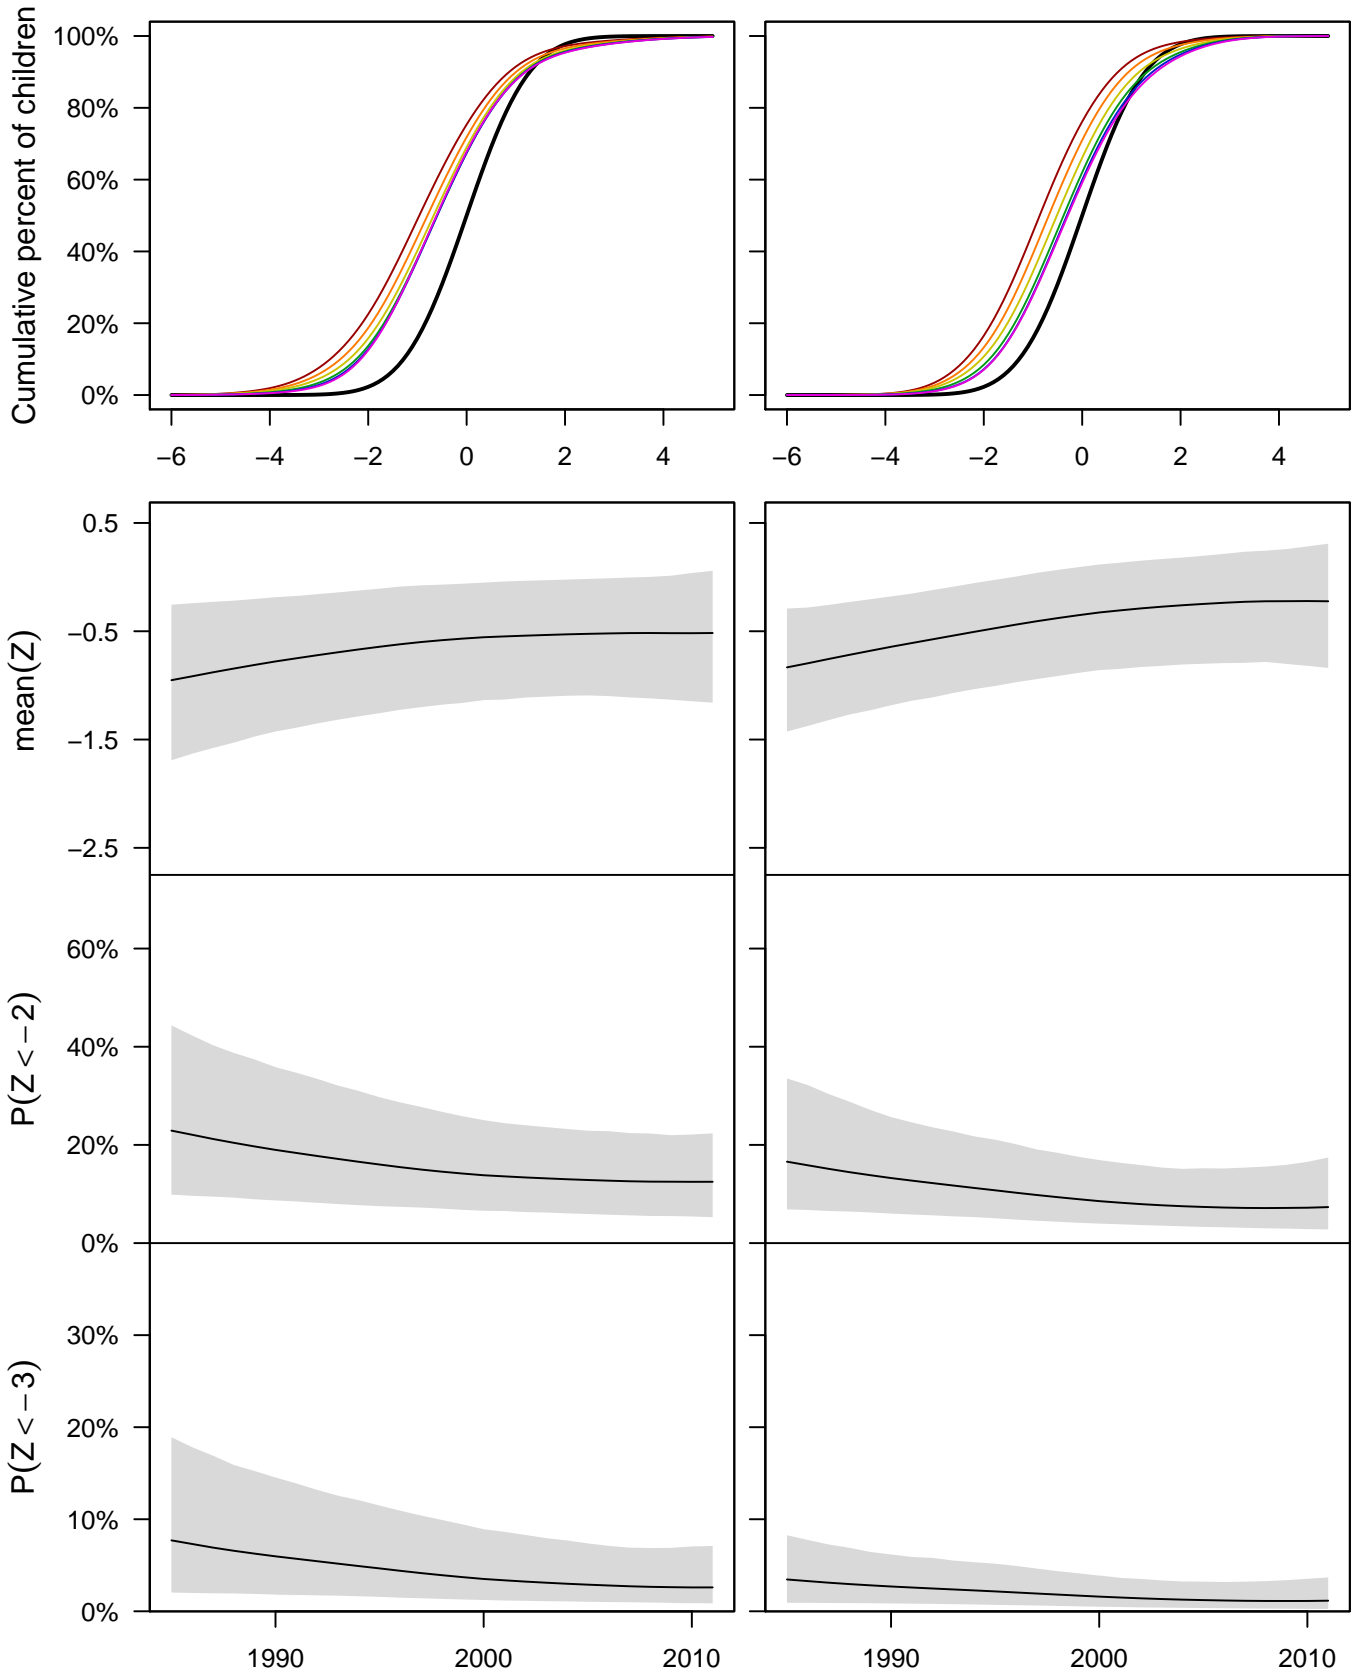

# Tajikistan

Central Asia, Middle East, and North Africa Region

HAZ

WAZ

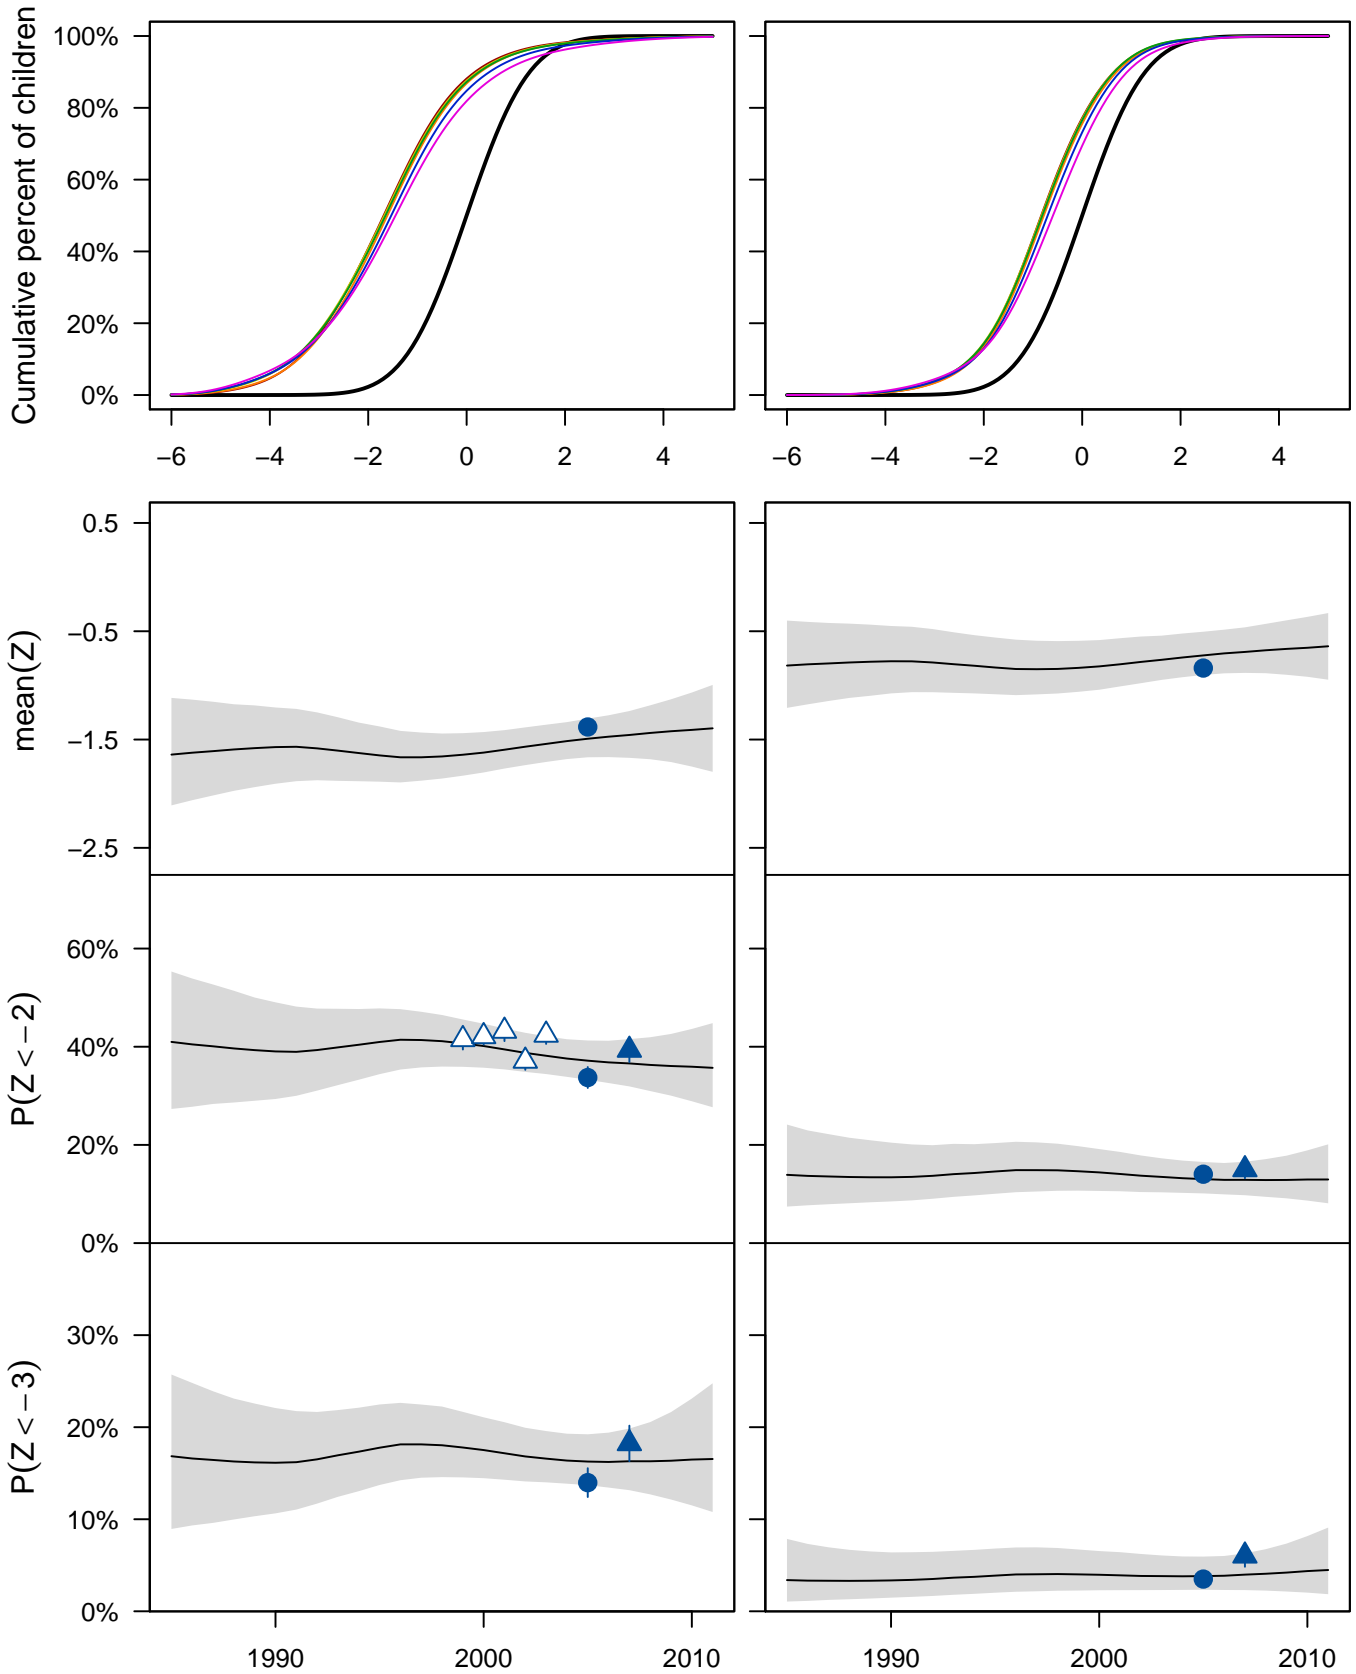

# Thailand

## East and Southeast Asia Region

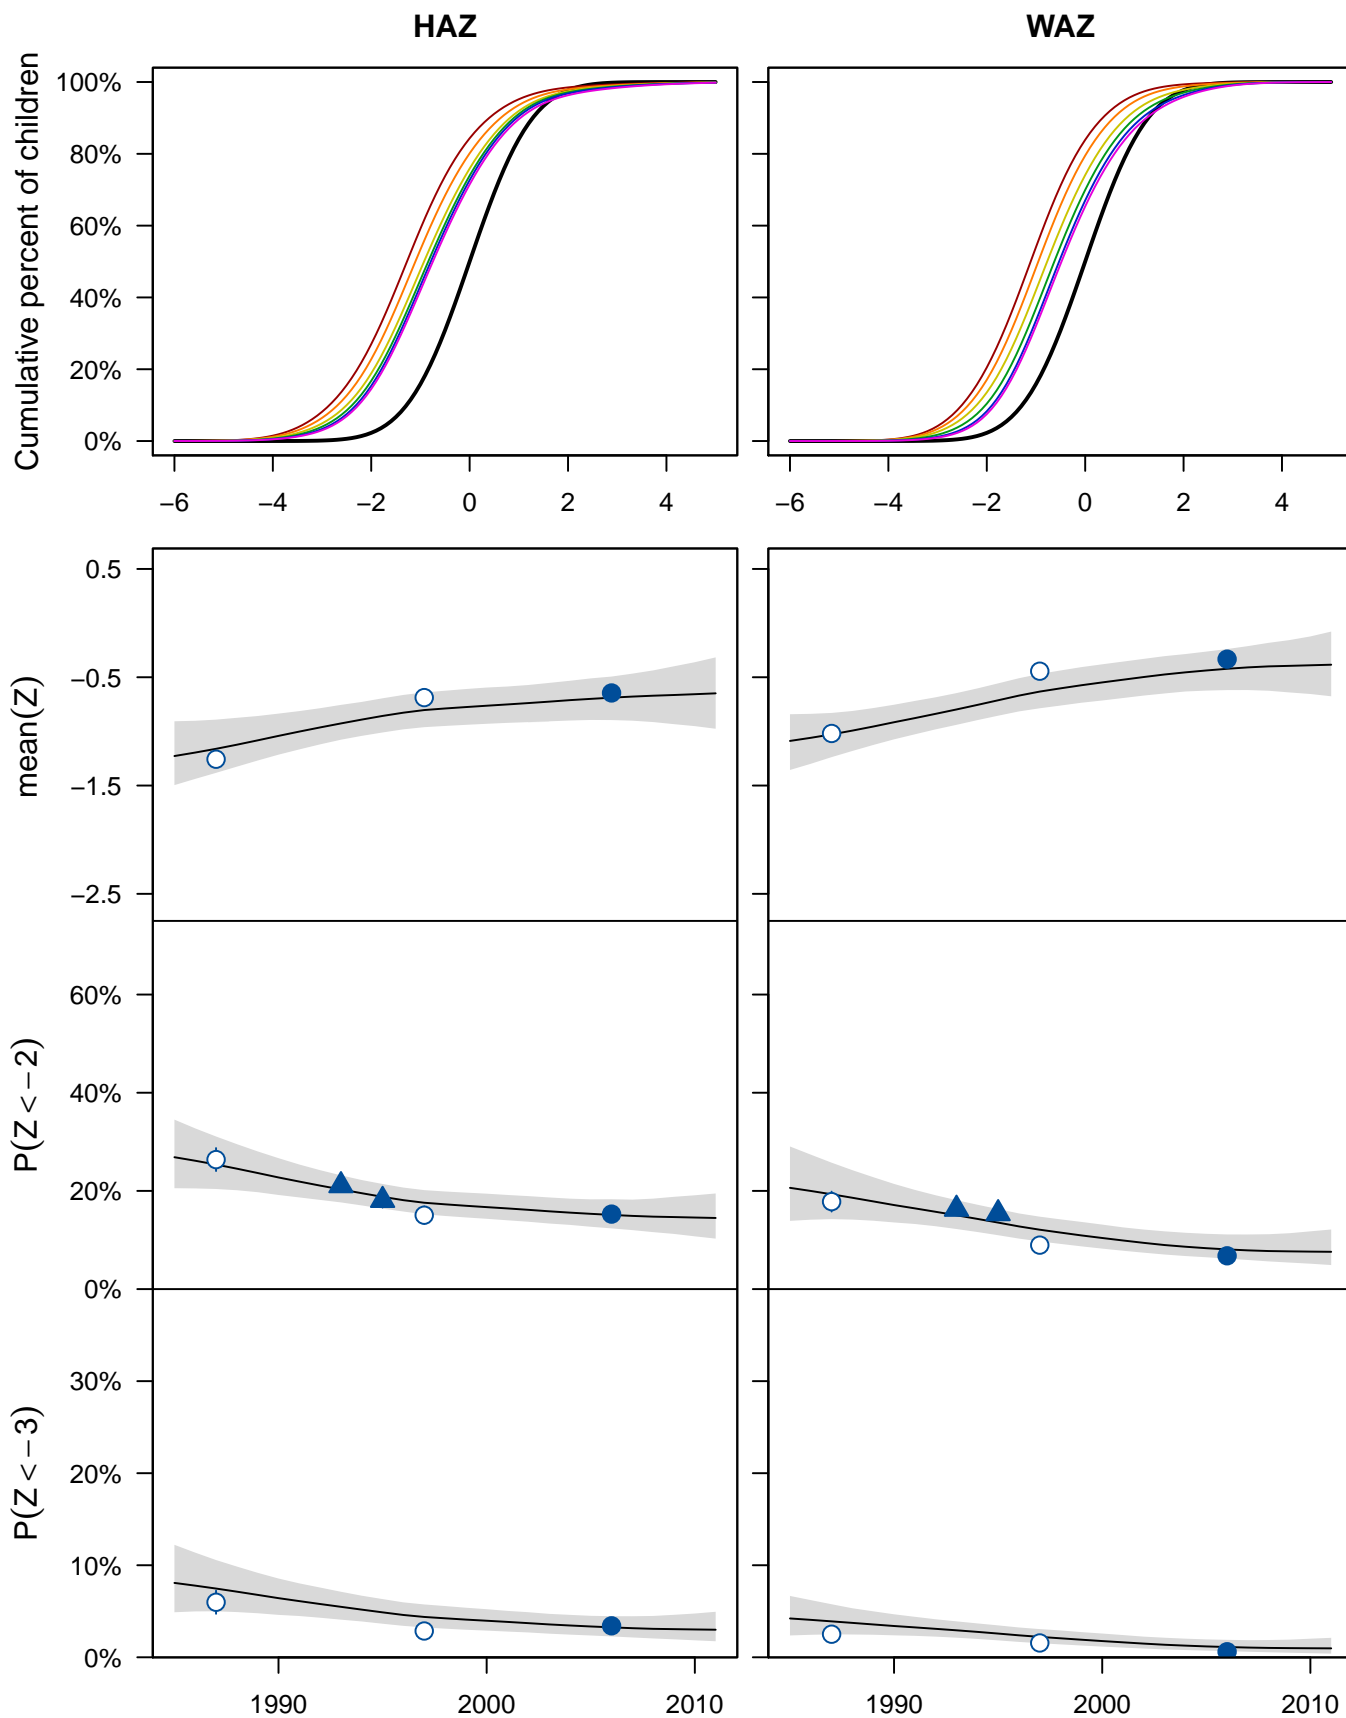

# Timor-Leste

## East and Southeast Asia Region

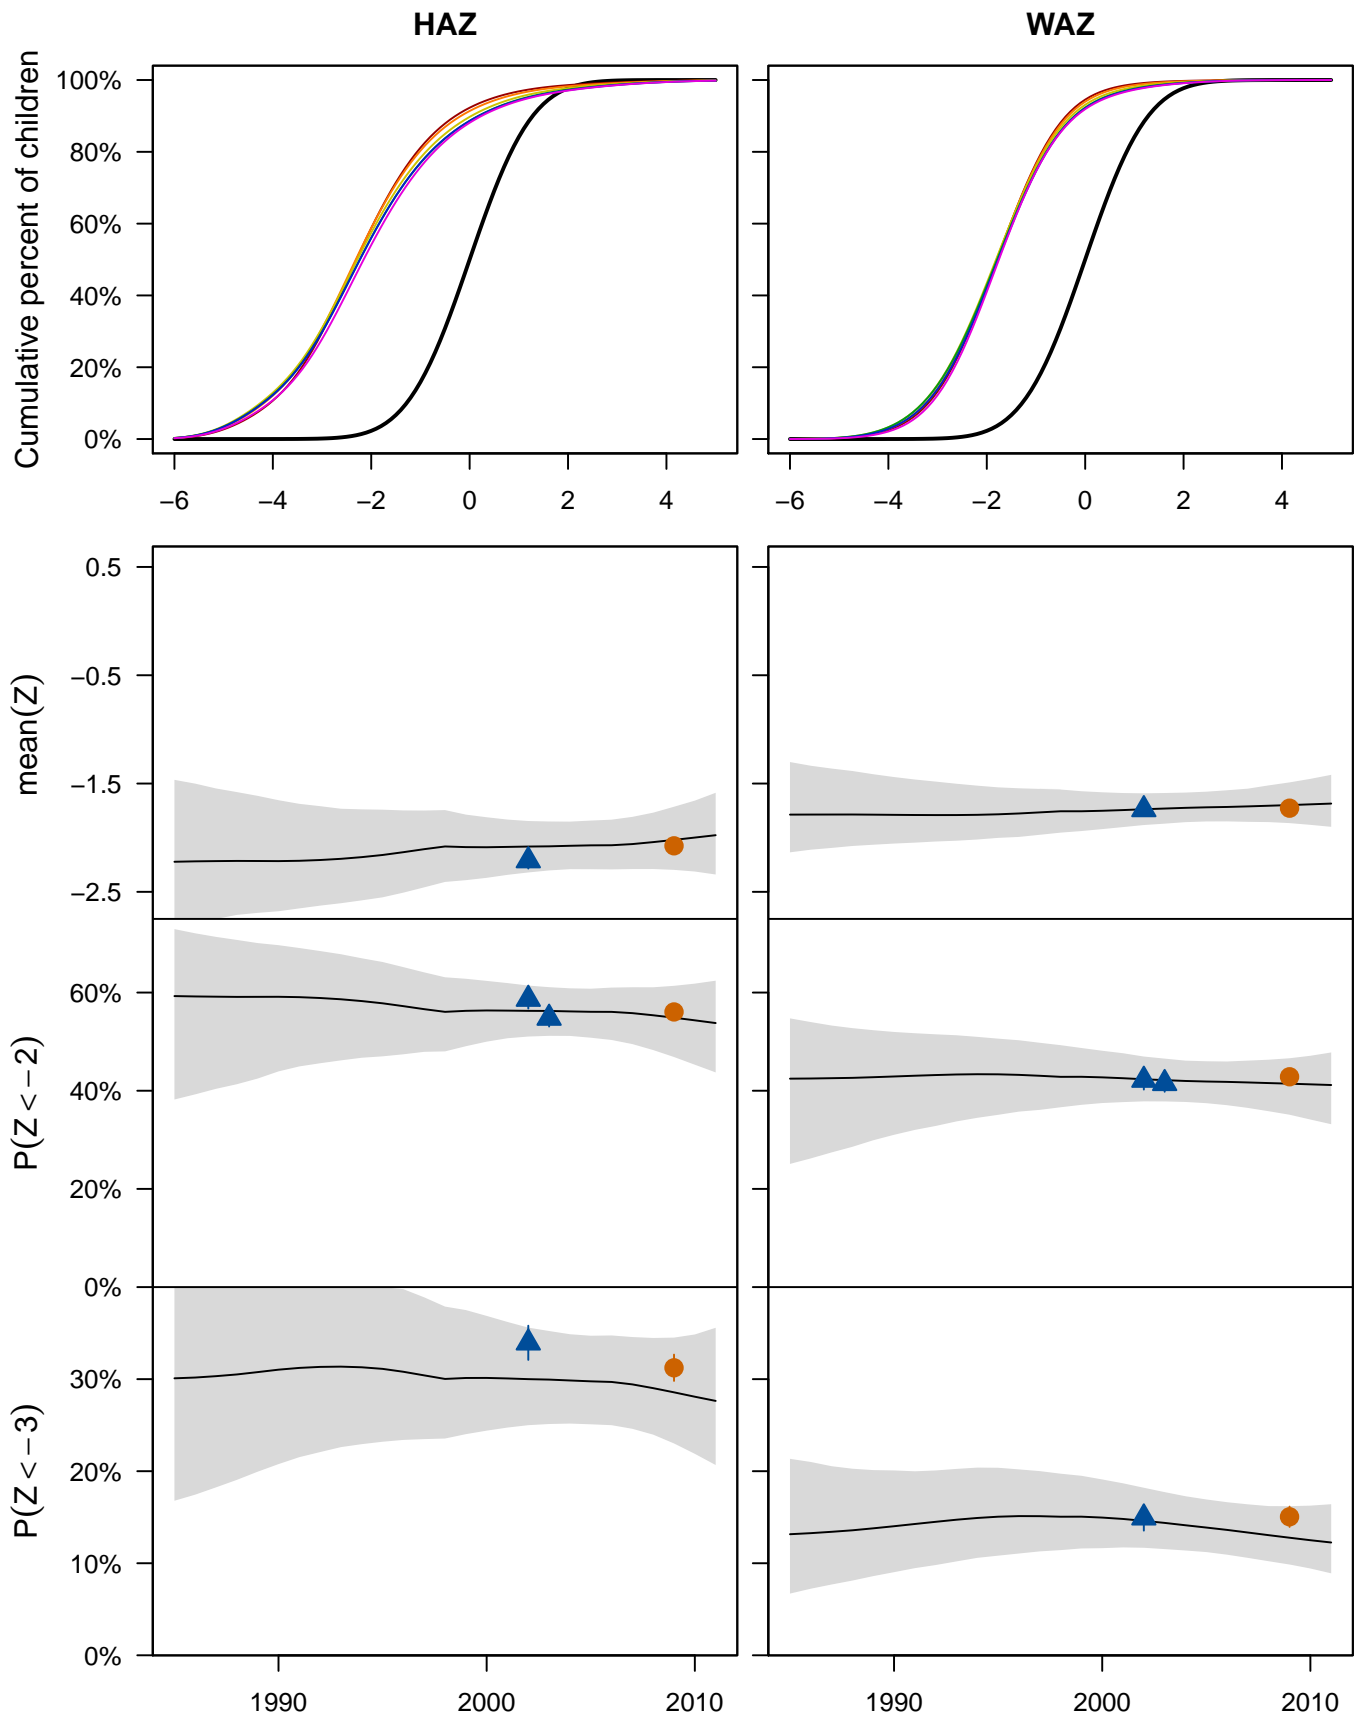

# Togo

## Sub-Saharan Africa Region

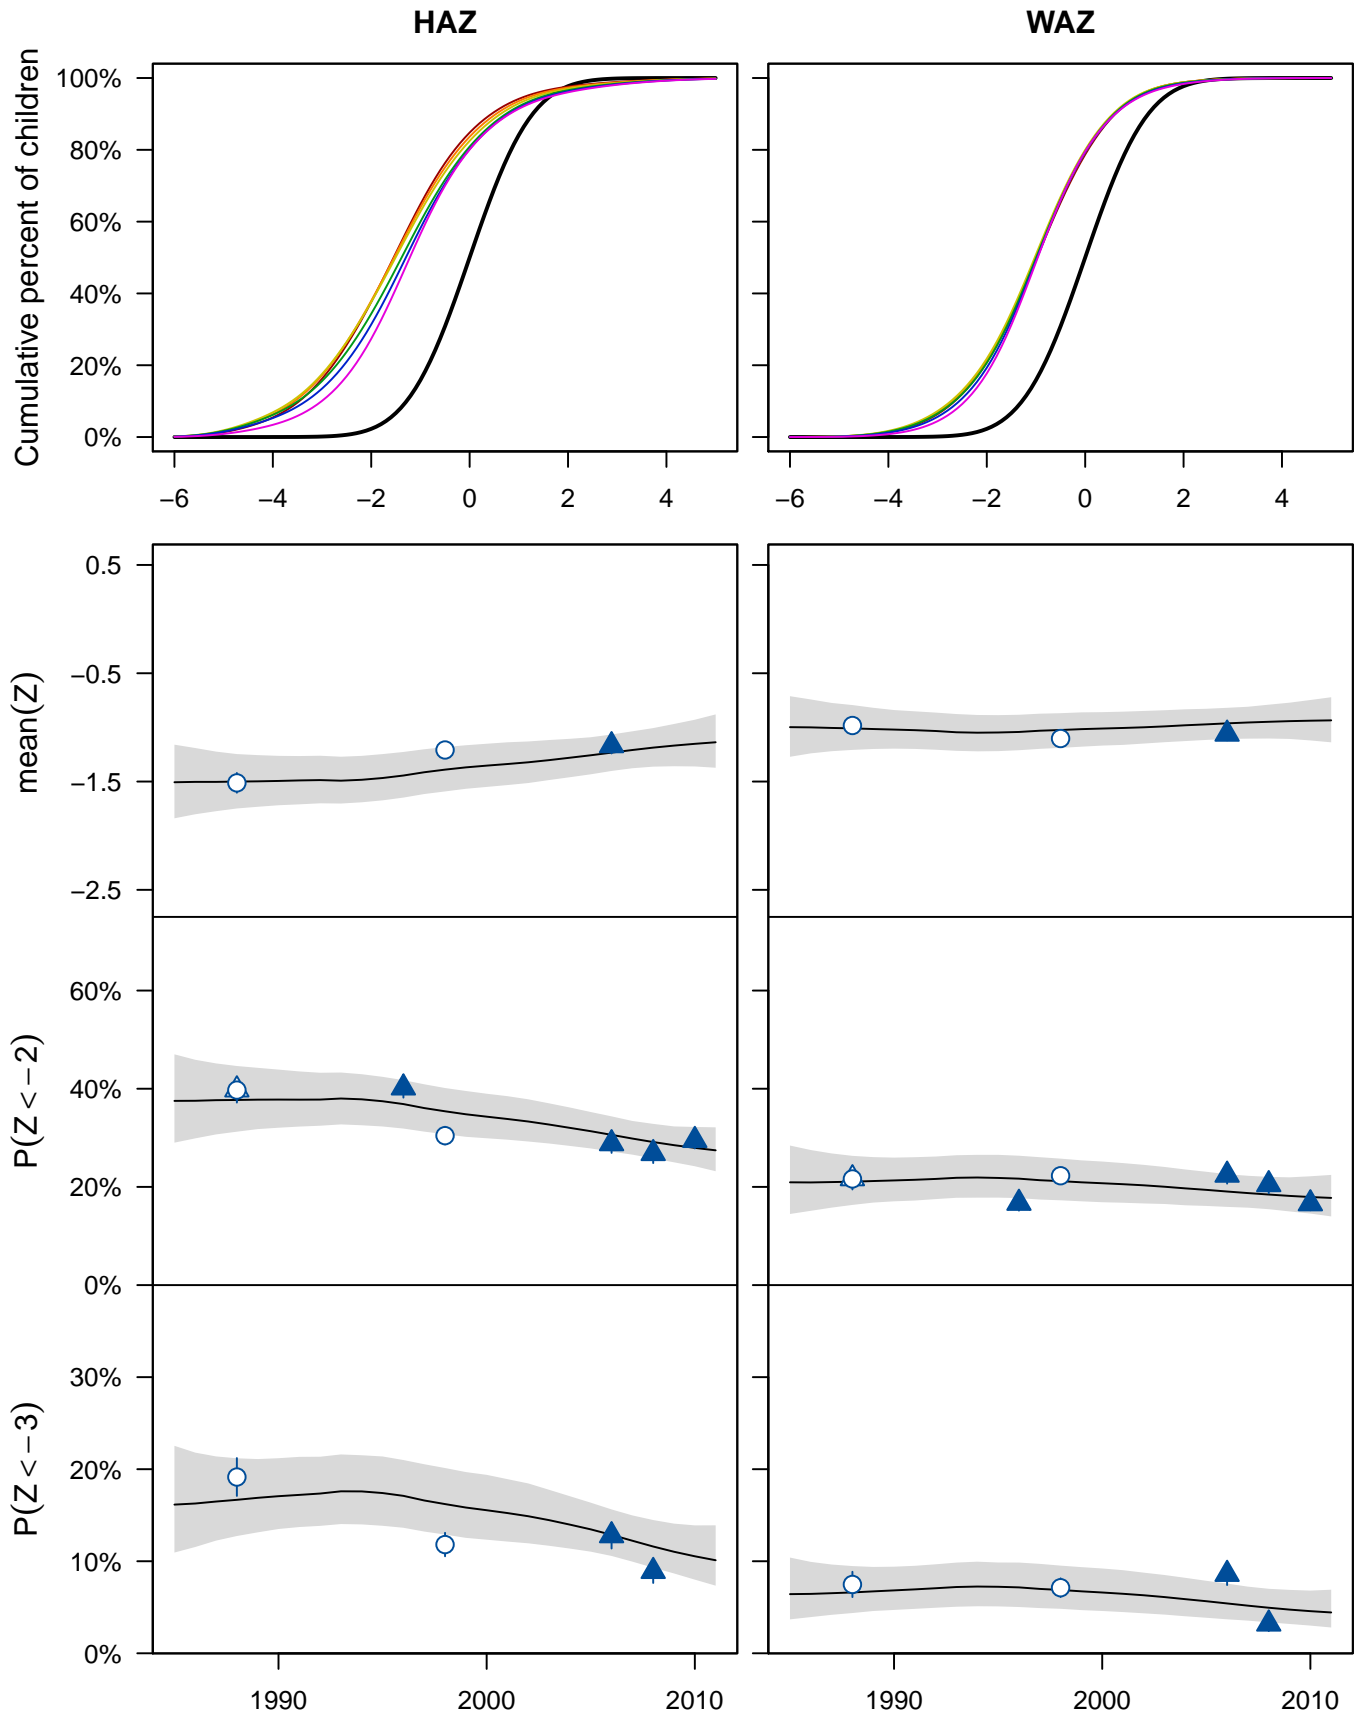



# Tonga

Oceania Region

## HAZ

## WAZ

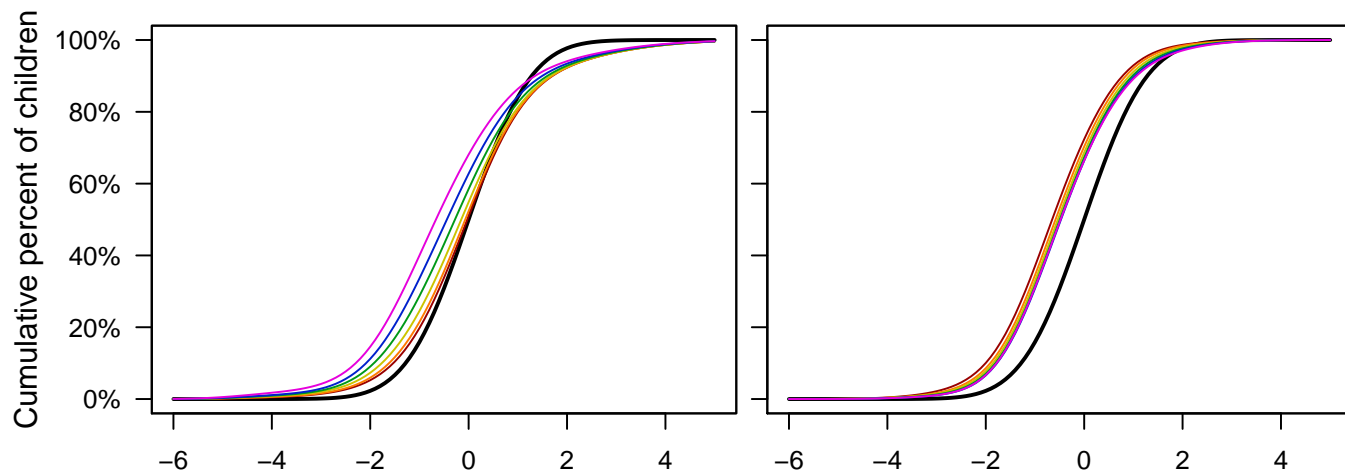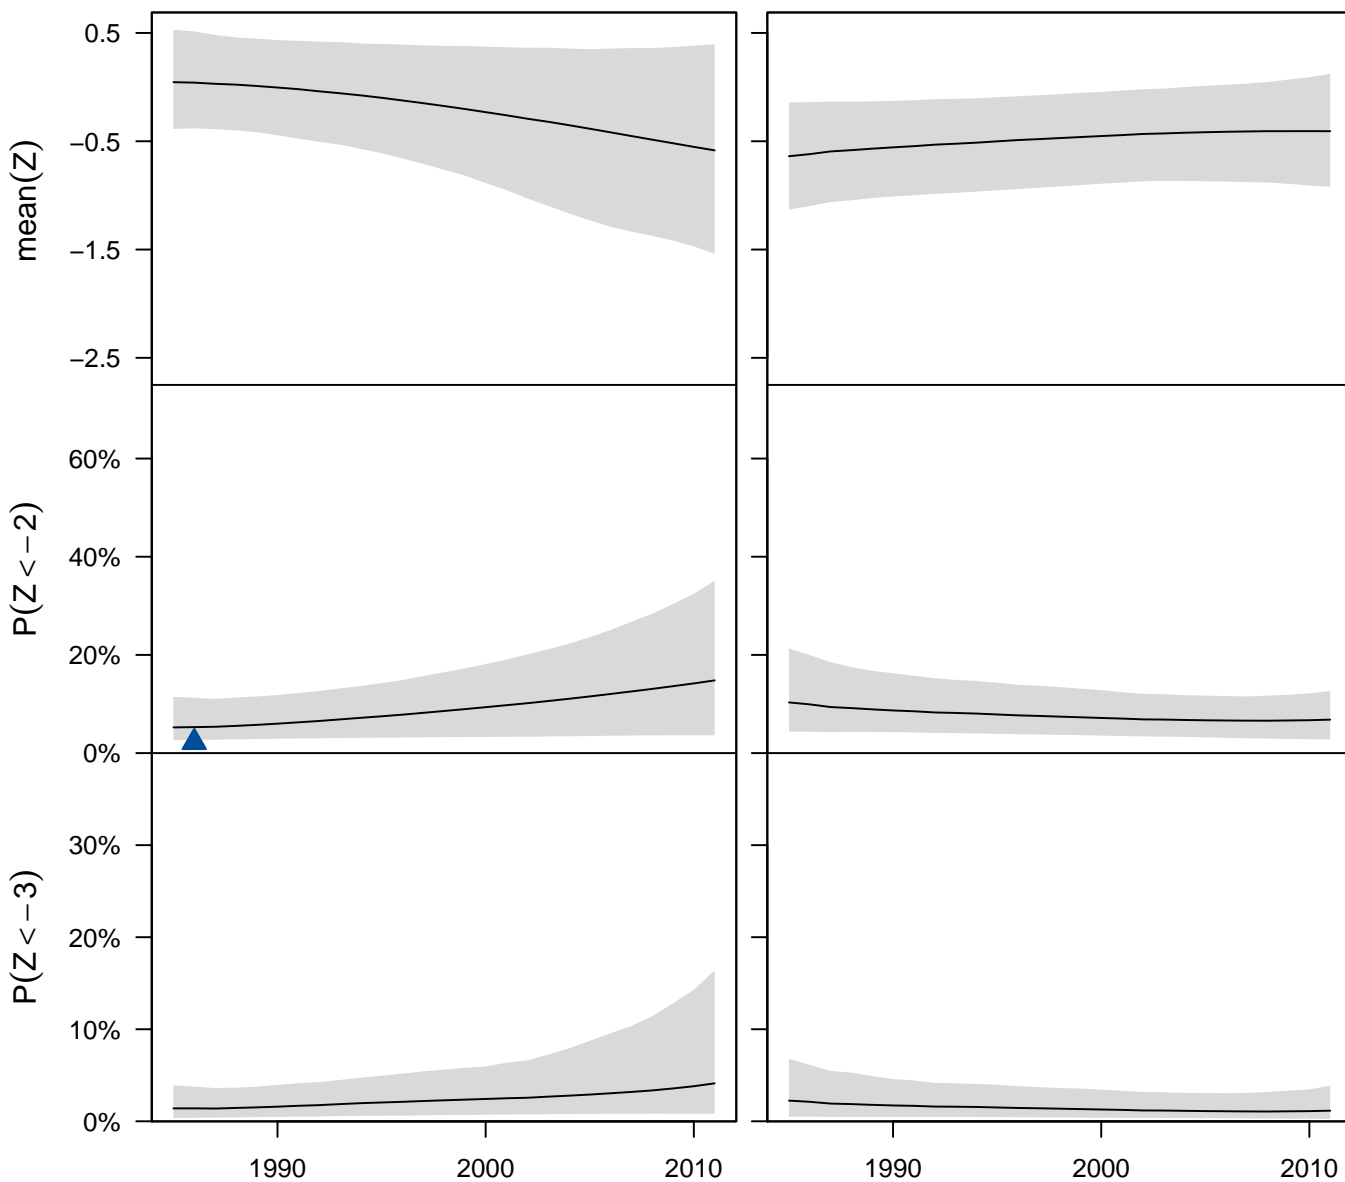

# Trinidad and Tobago

Andean and Central Latin America and Caribbean Region

HAZ

WAZ

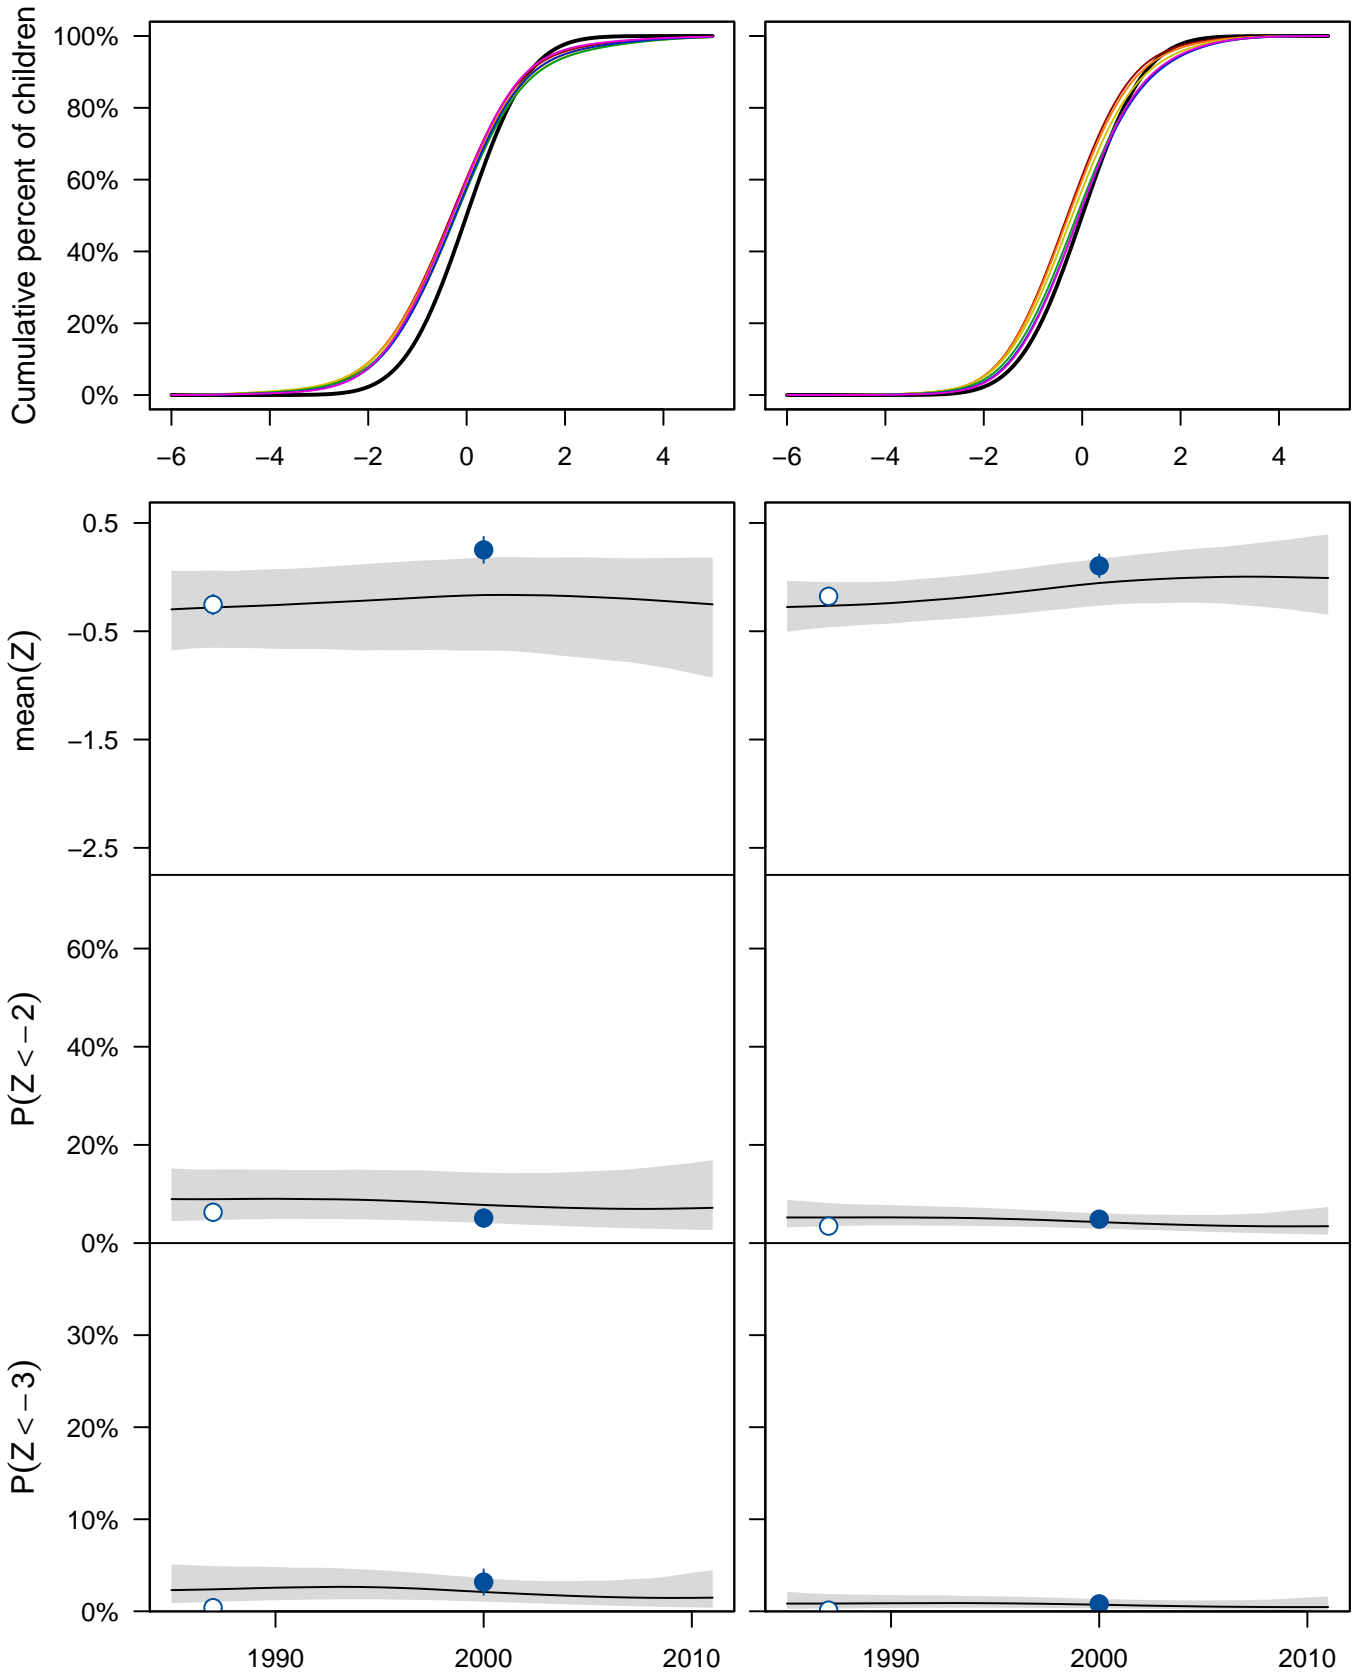

# Tunisia

Central Asia, Middle East, and North Africa Region

HAZ

WAZ

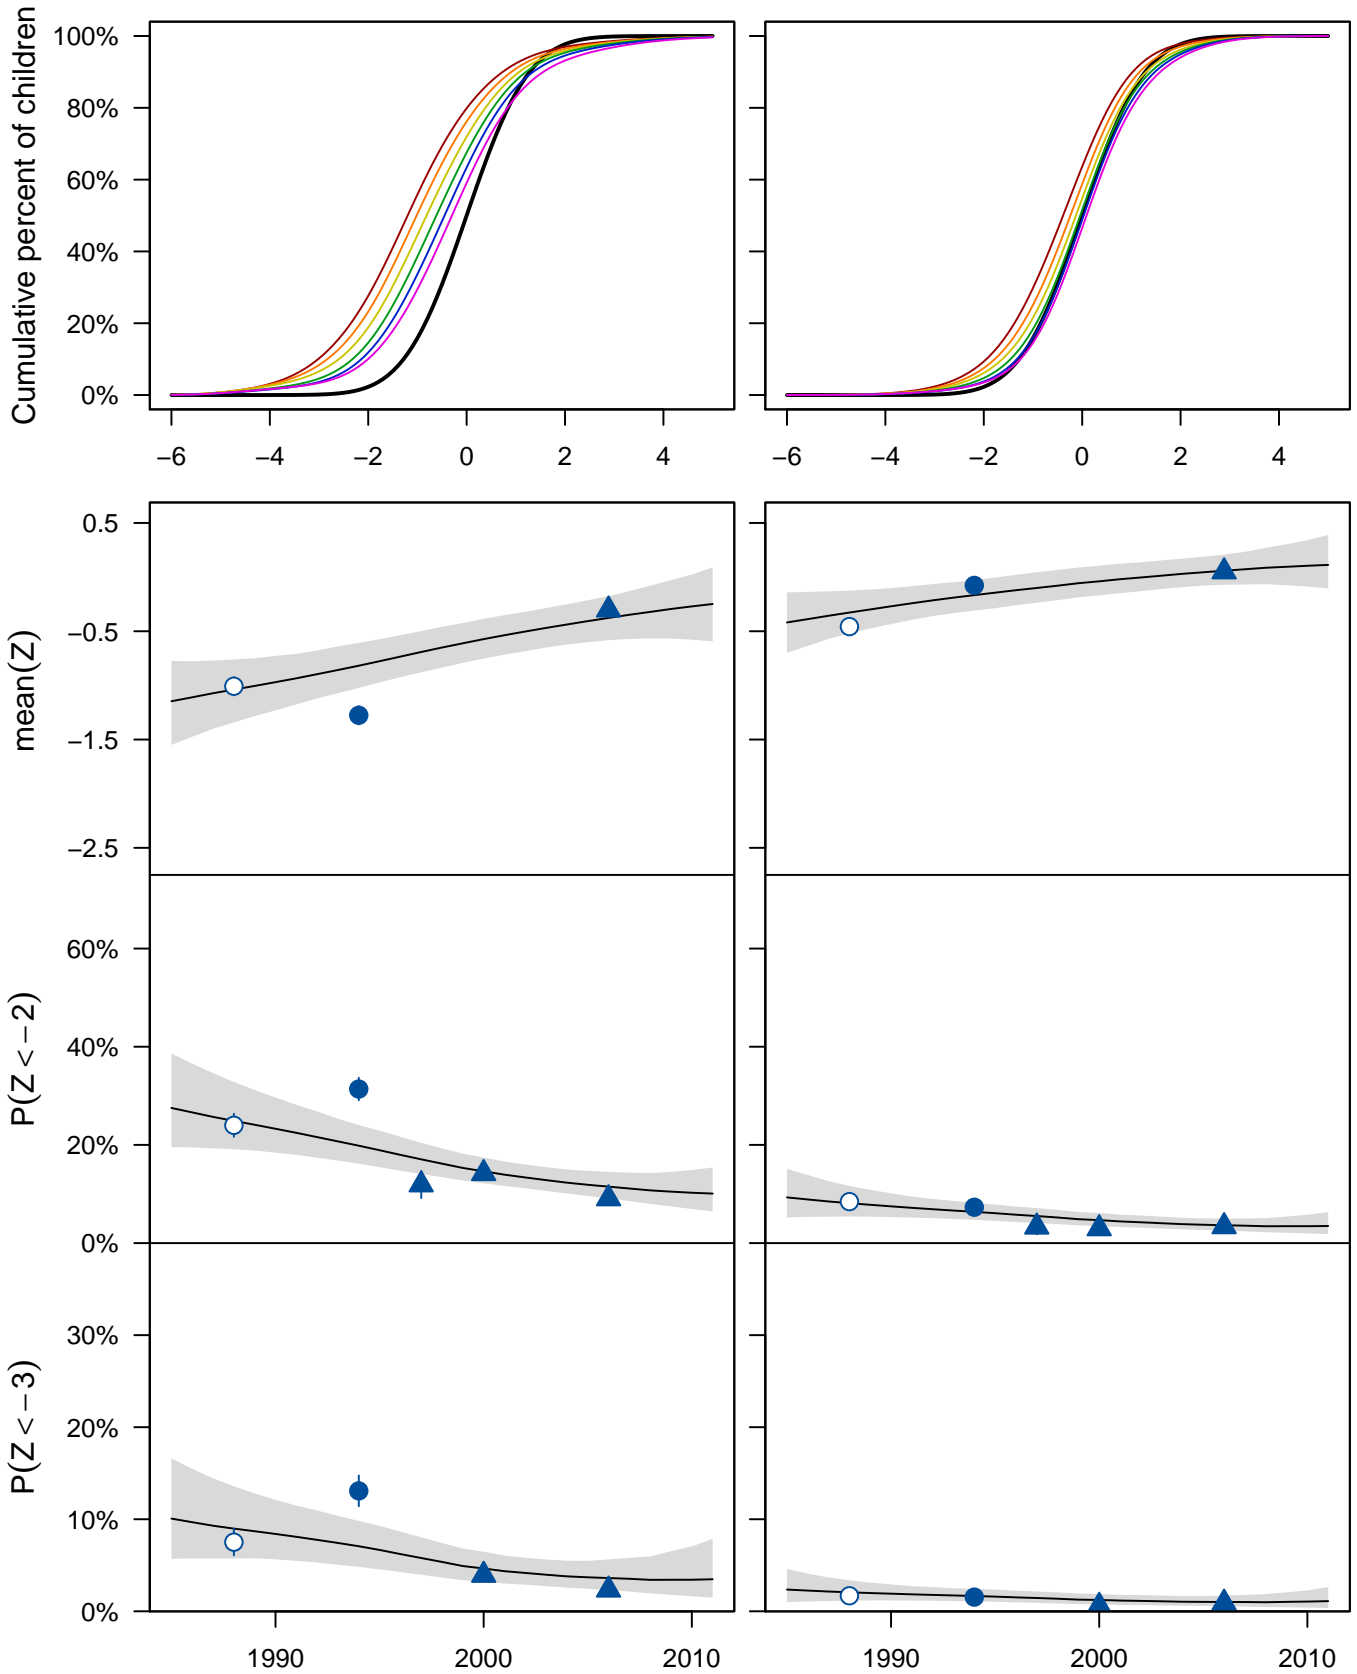

# Turkey

Central Asia, Middle East, and North Africa Region

HAZ

WAZ

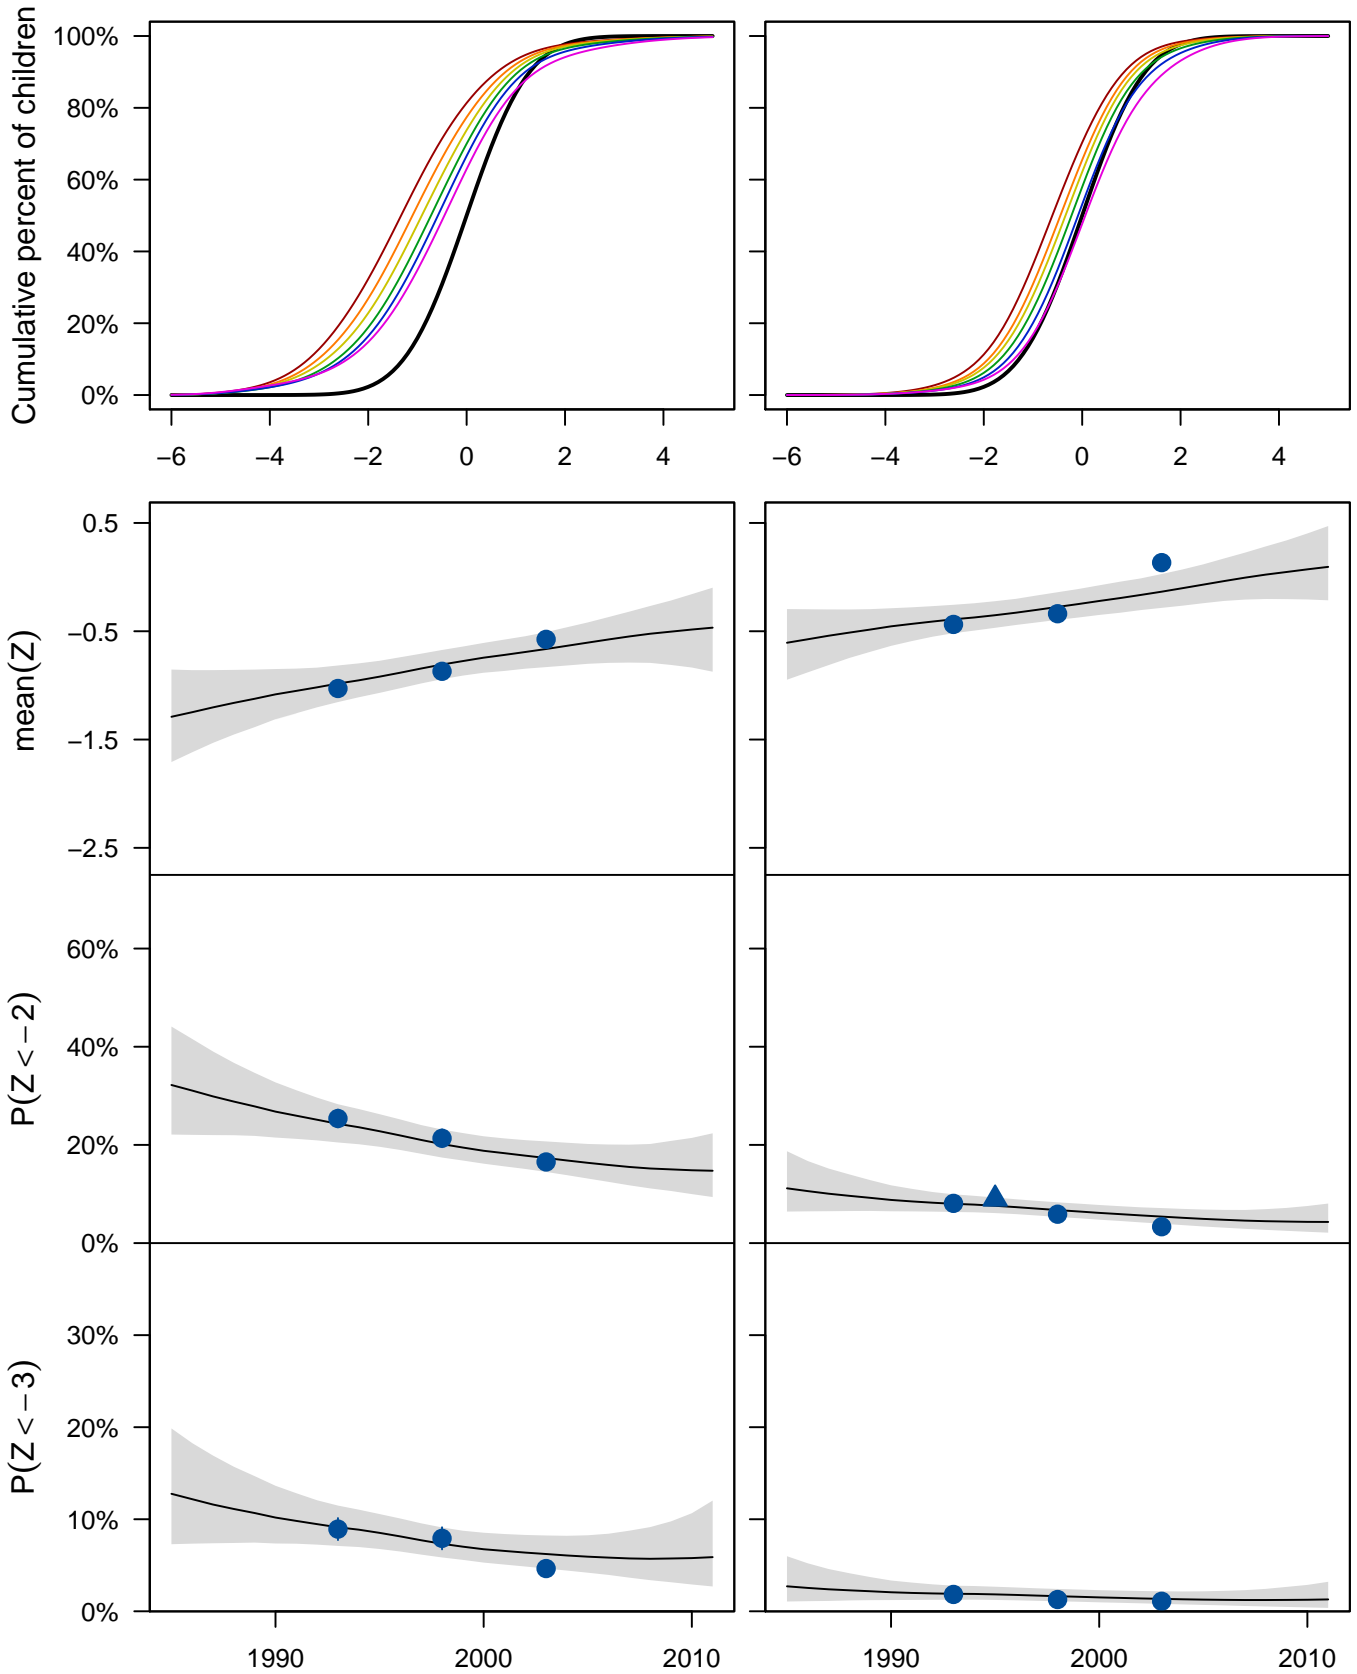

# Turkmenistan

Central Asia, Middle East, and North Africa Region

HAZ

WAZ

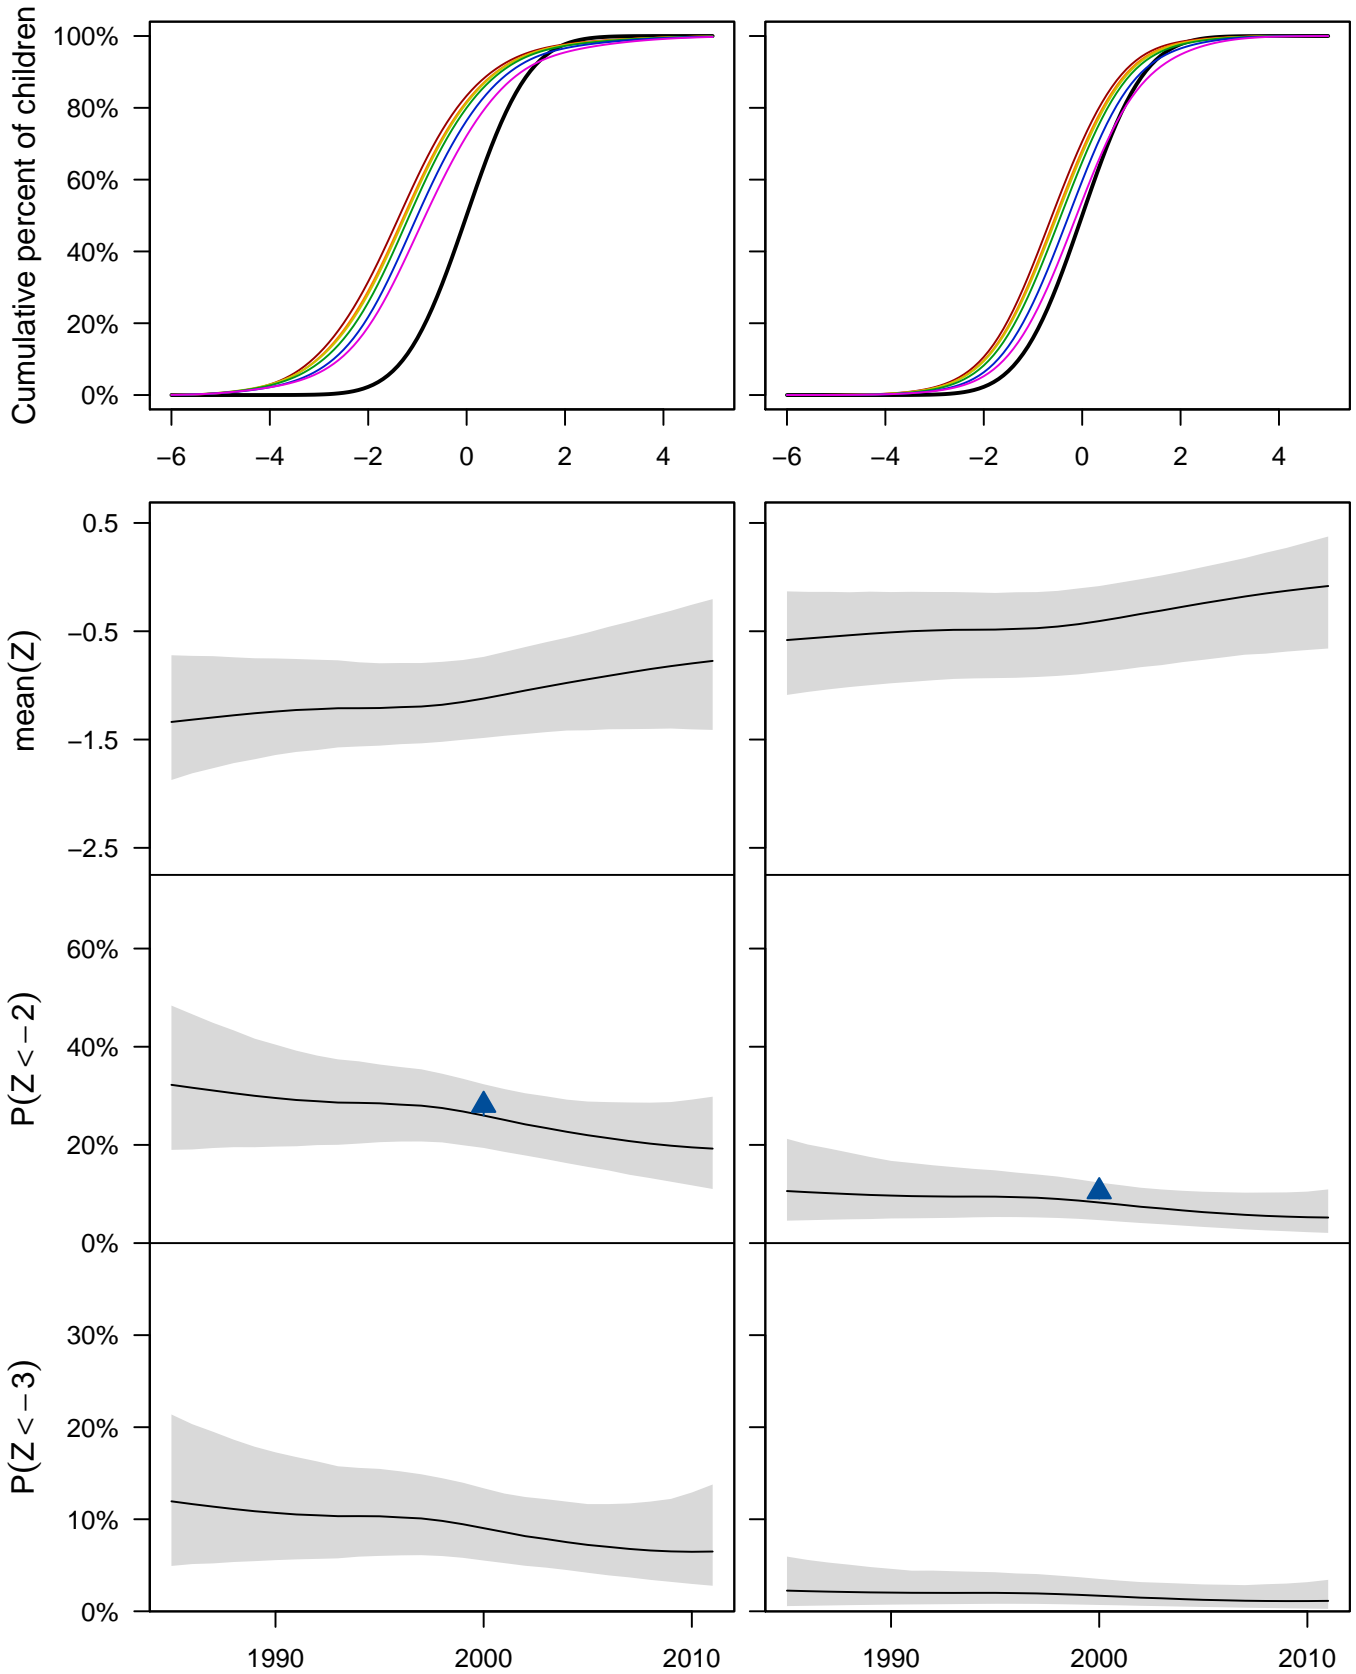

# Uganda

Sub-Saharan Africa Region

HAZ

WAZ

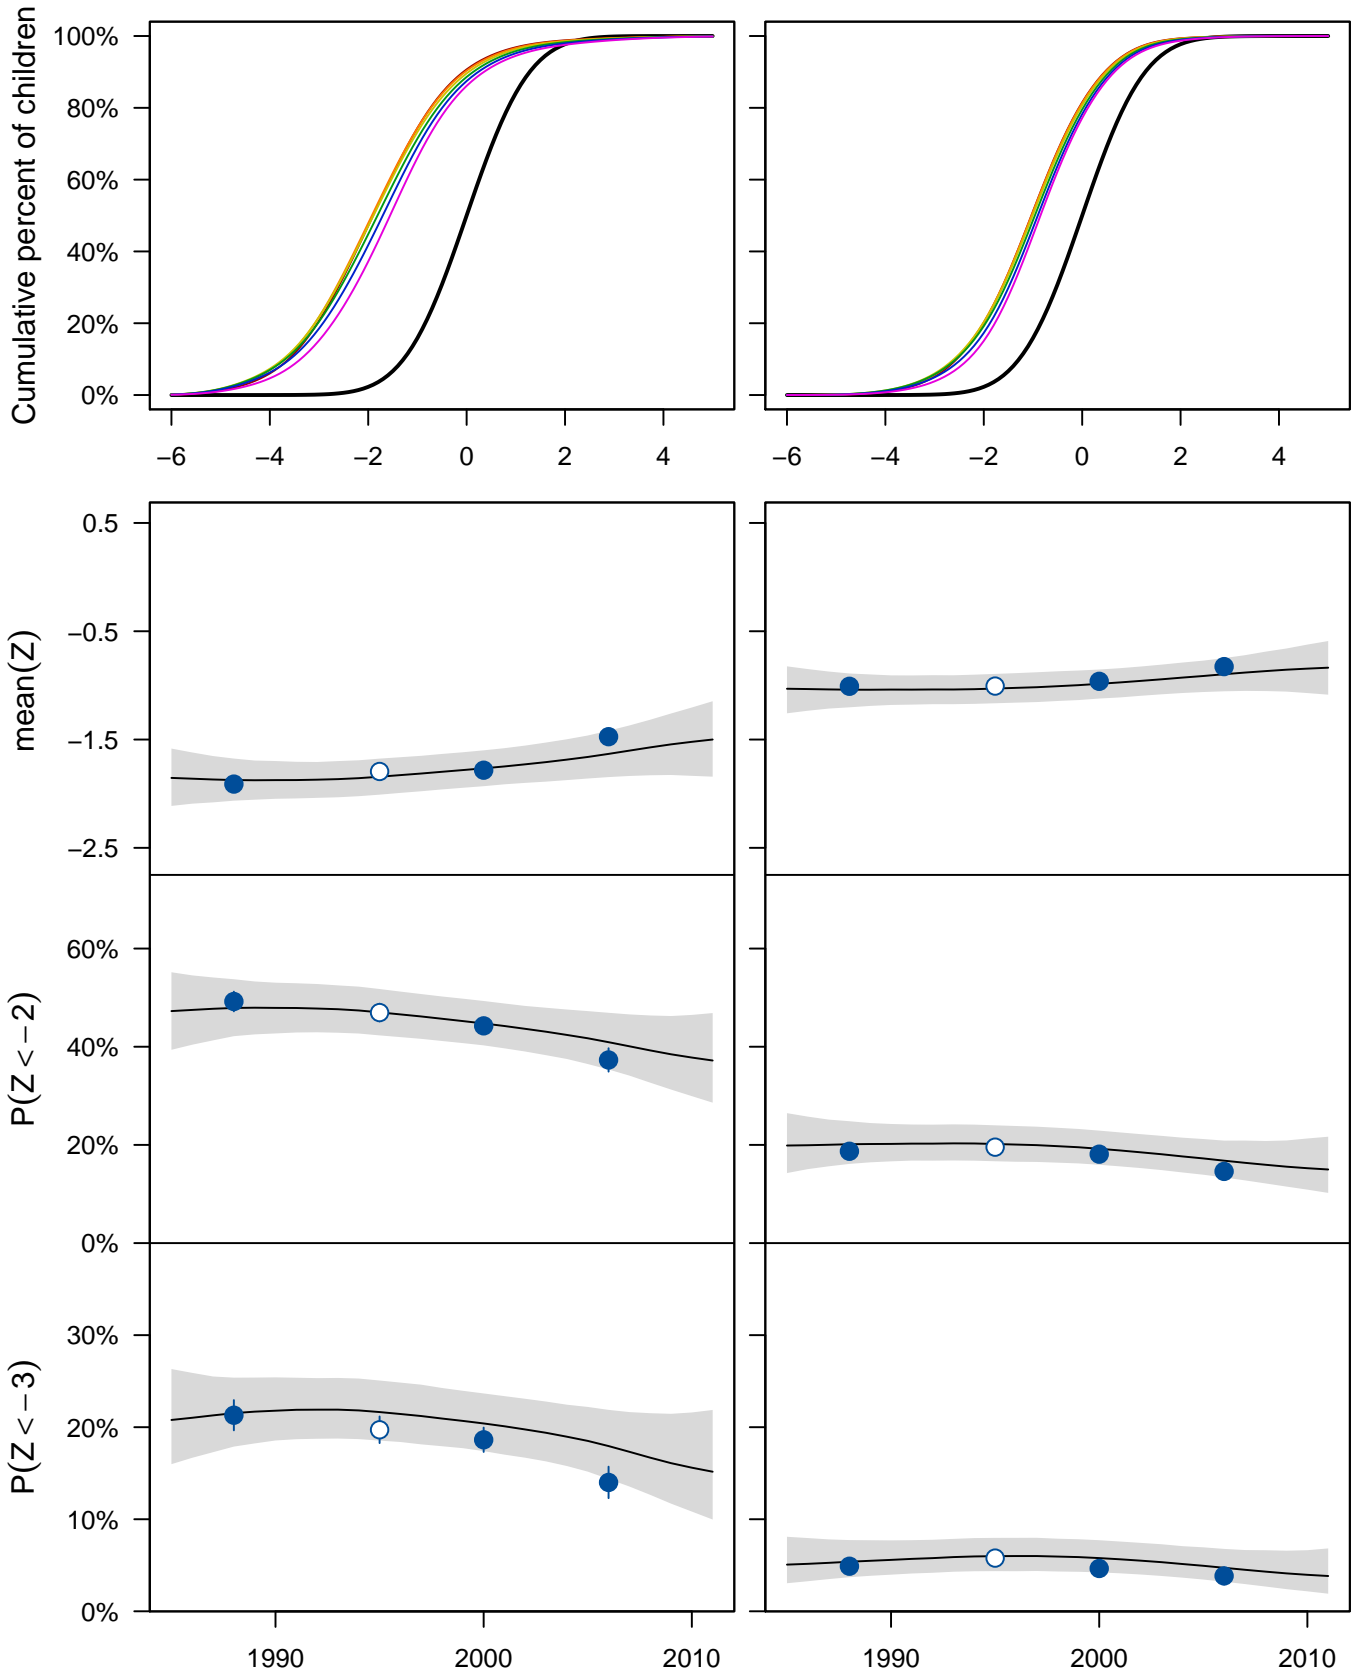

# United Arab Emirates

Central Asia, Middle East, and North Africa Region

HAZ

WAZ

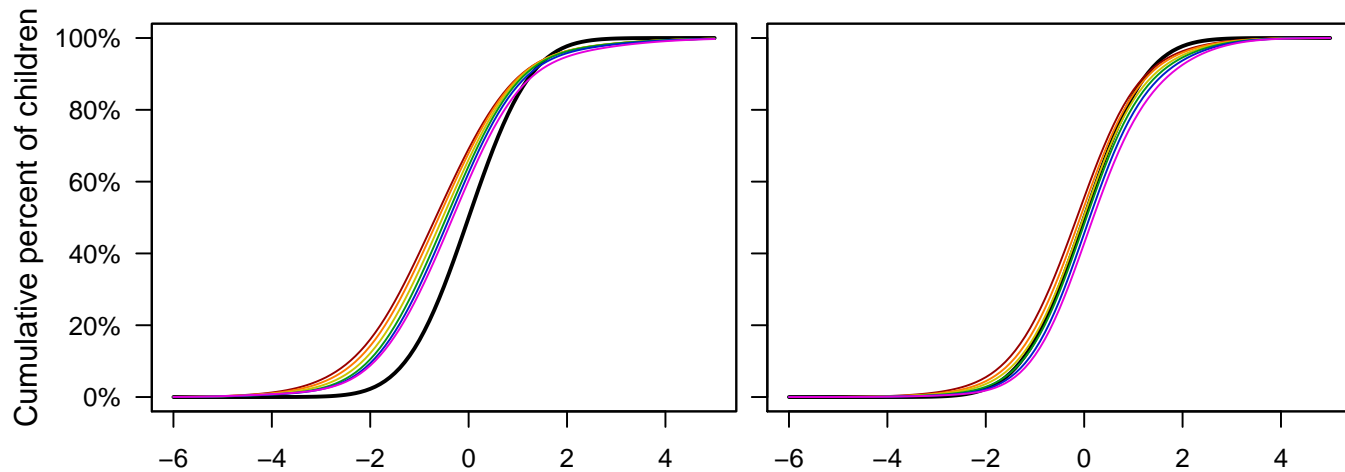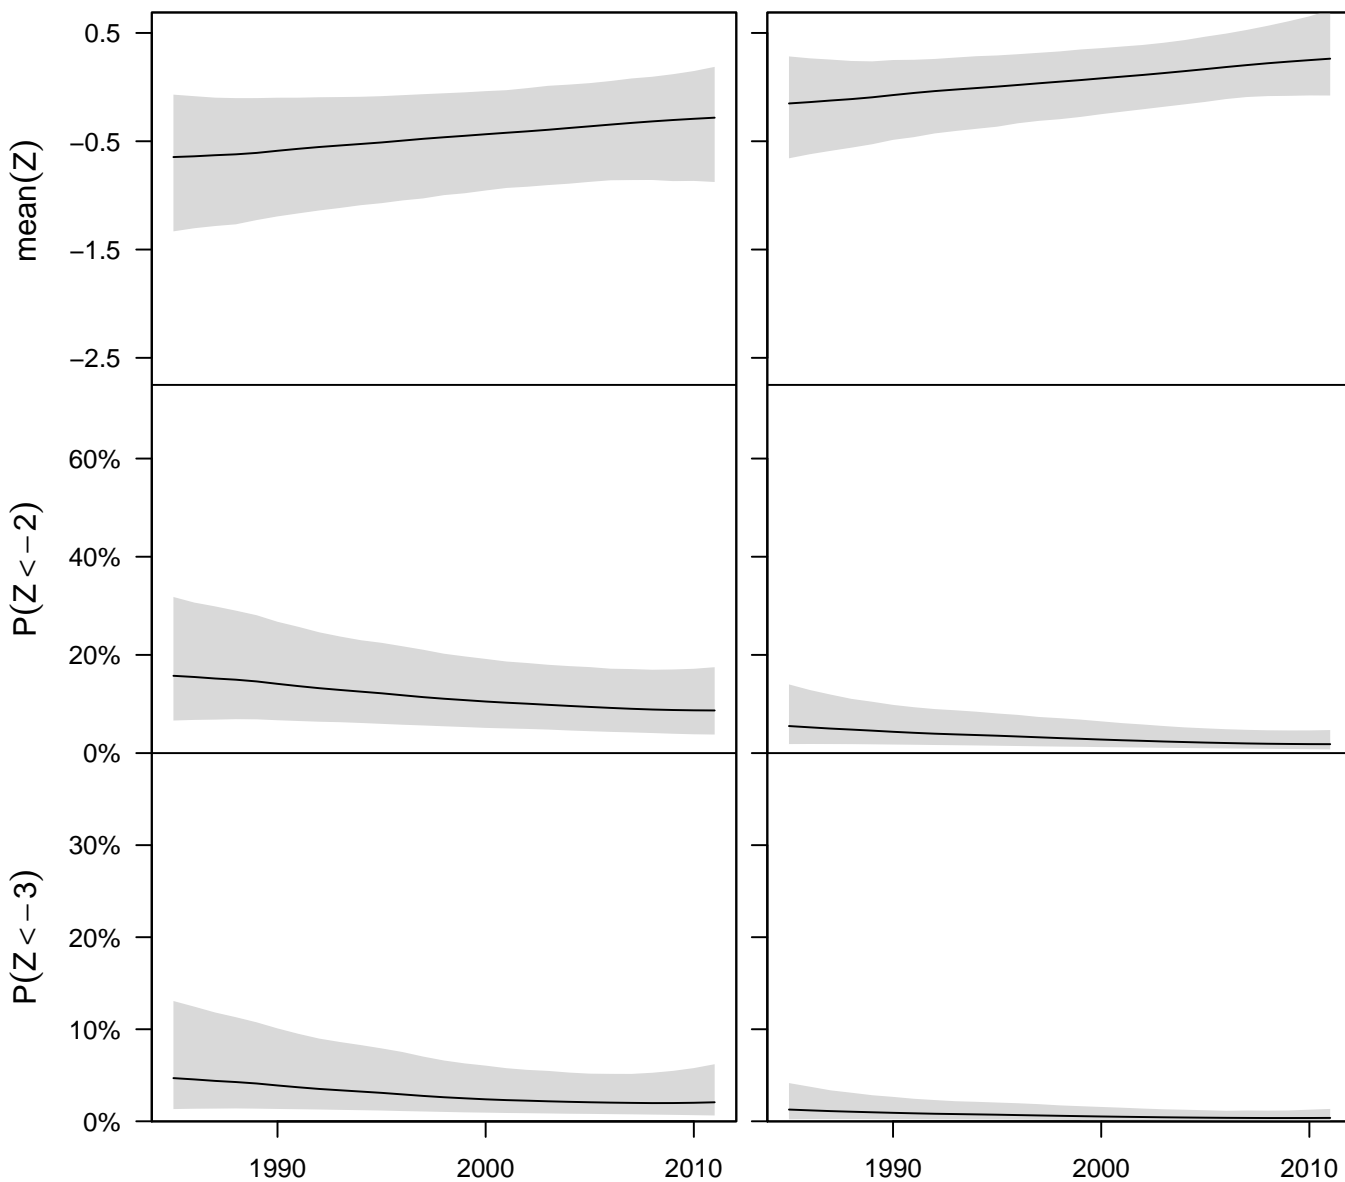

# United Republic of Tanzania

Sub-Saharan Africa Region

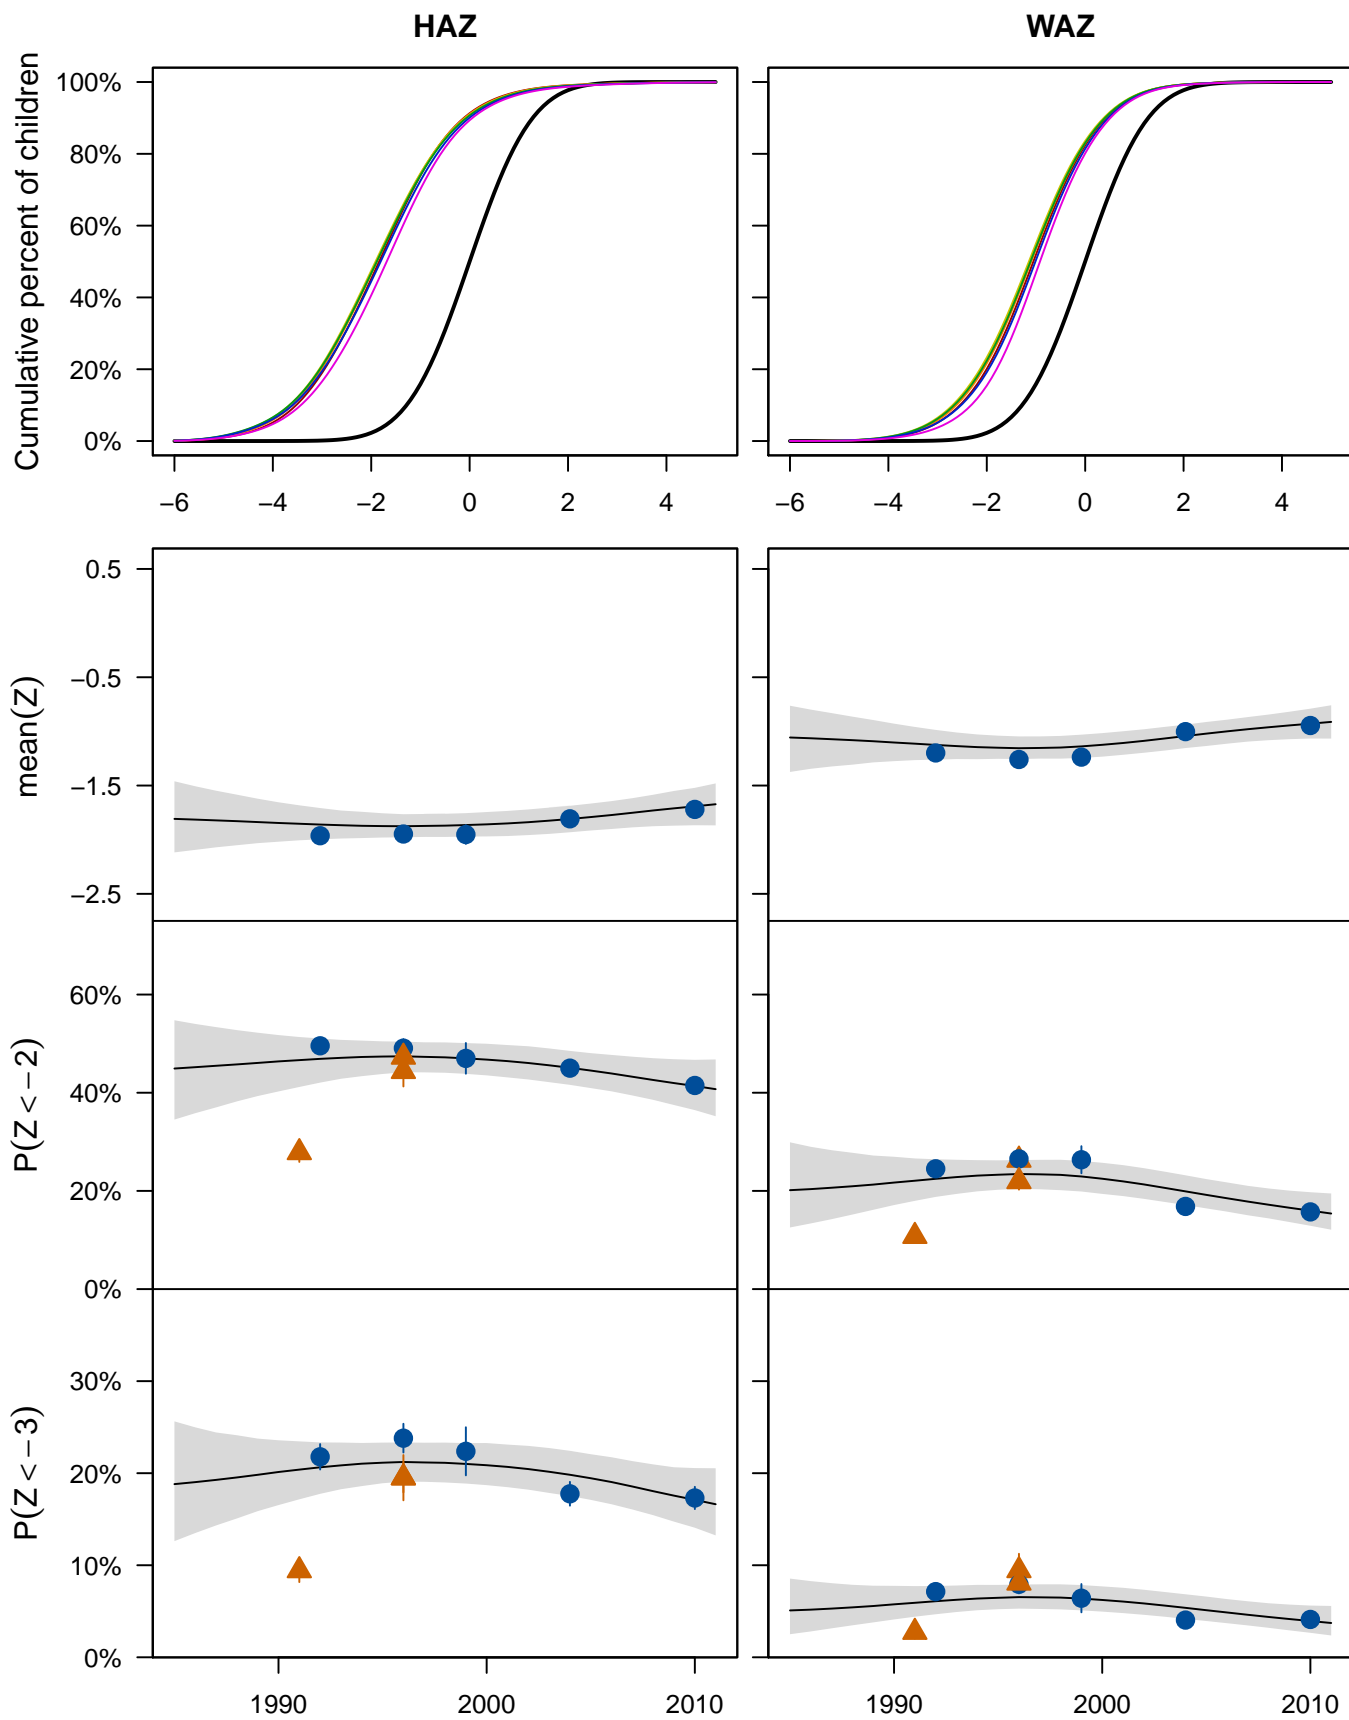



# Uruguay

Southern and Tropical Latin America Region

HAZ

WAZ

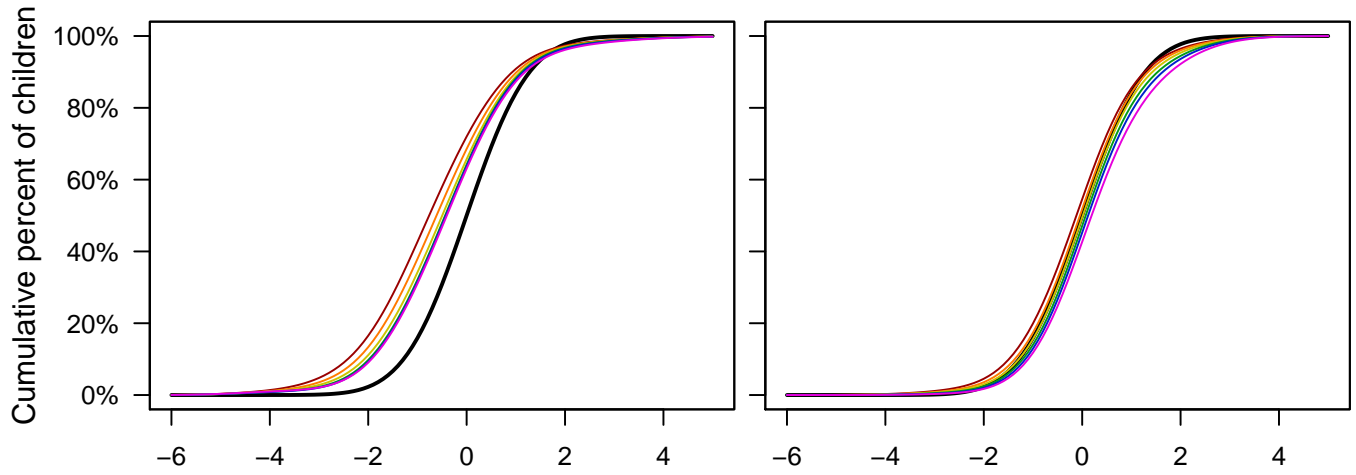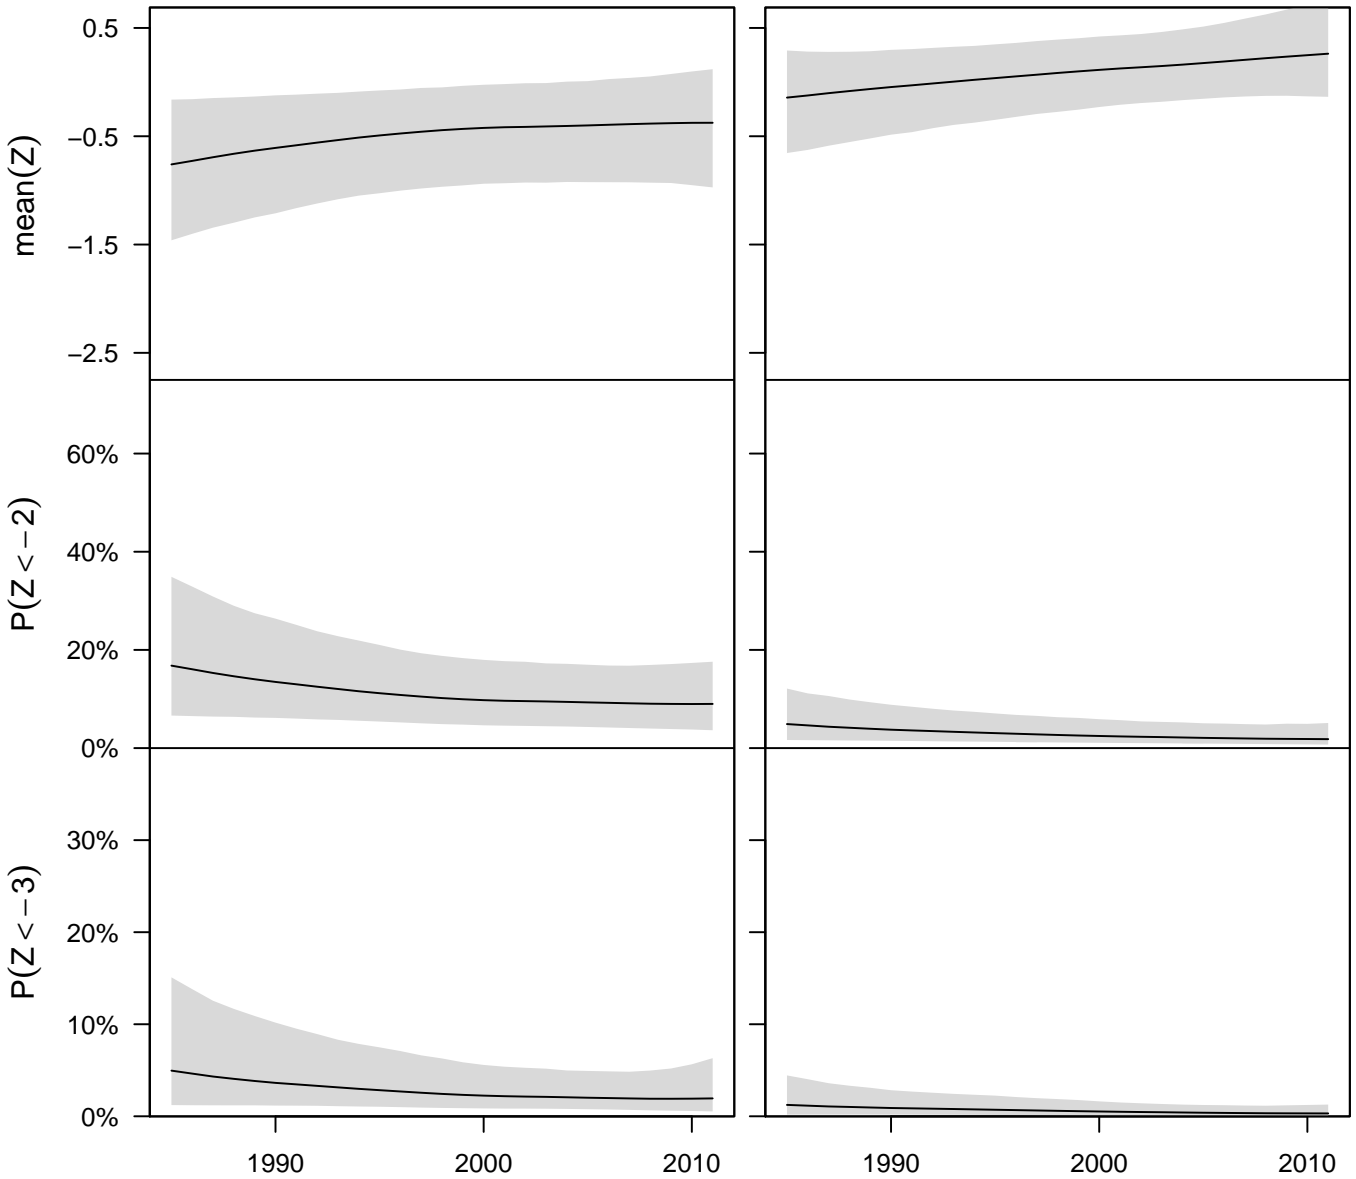

# Uzbekistan

Central Asia, Middle East, and North Africa Region

HAZ

WAZ

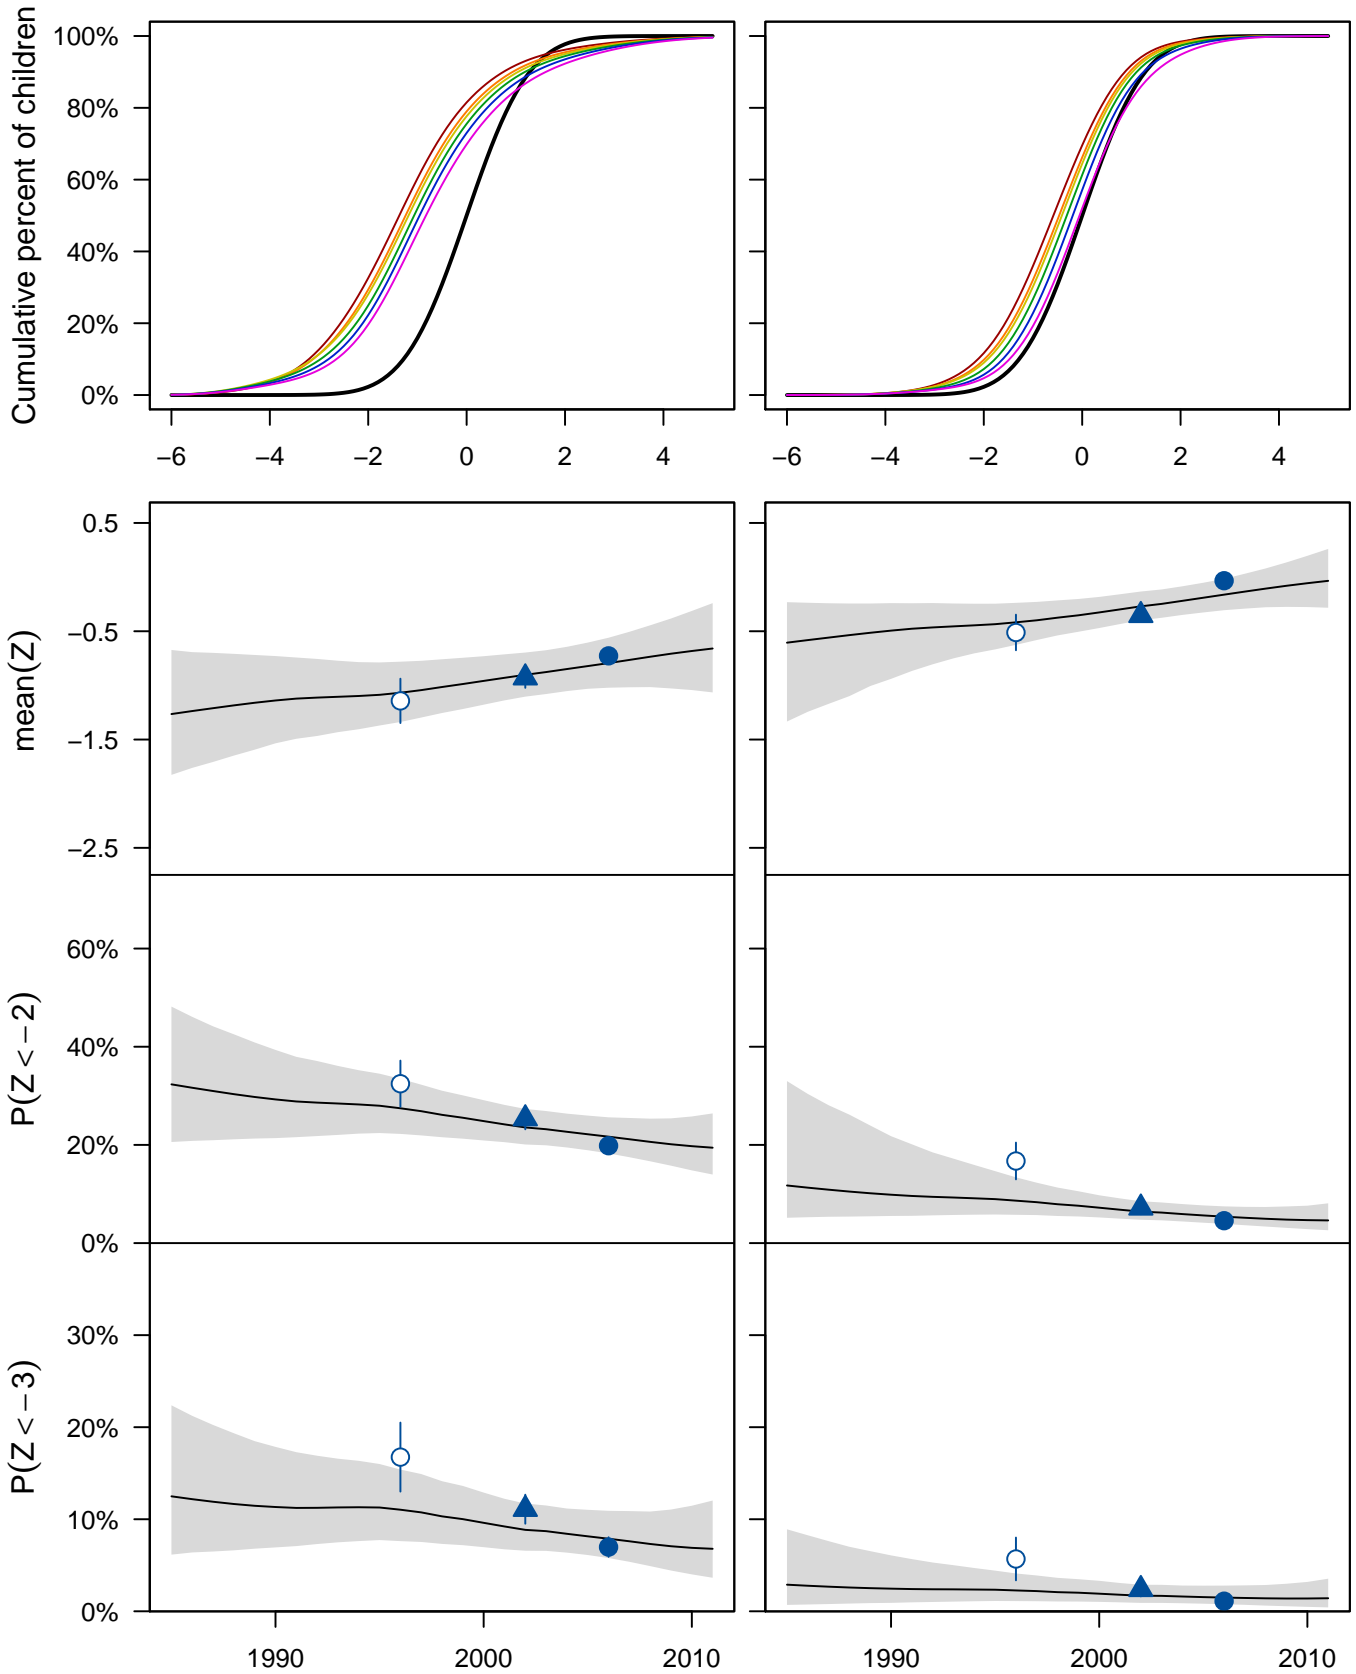

# Vanuatu

Oceania Region

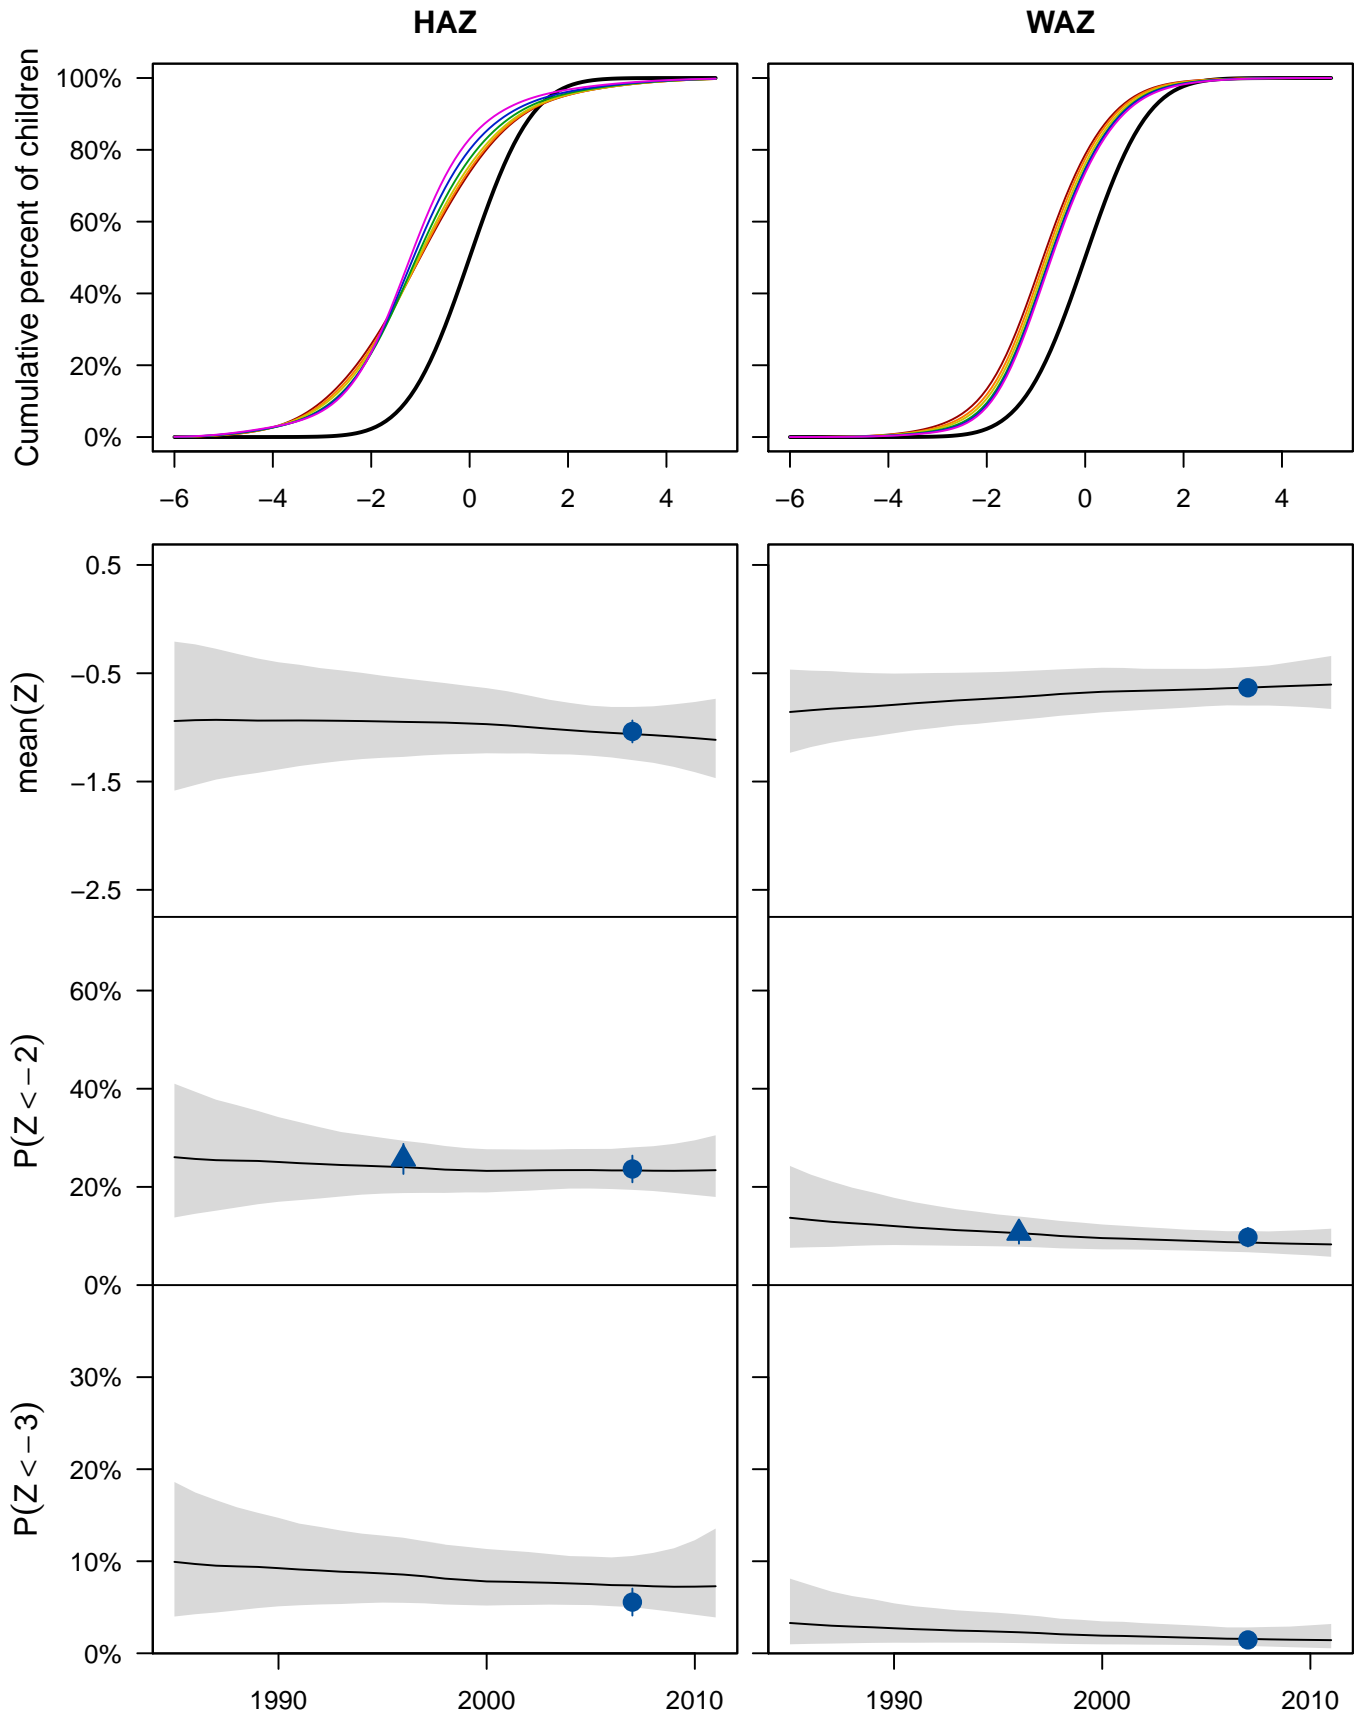

# Venezuela (Bolivarian Republic of)

Andean and Central Latin America and Caribbean Region

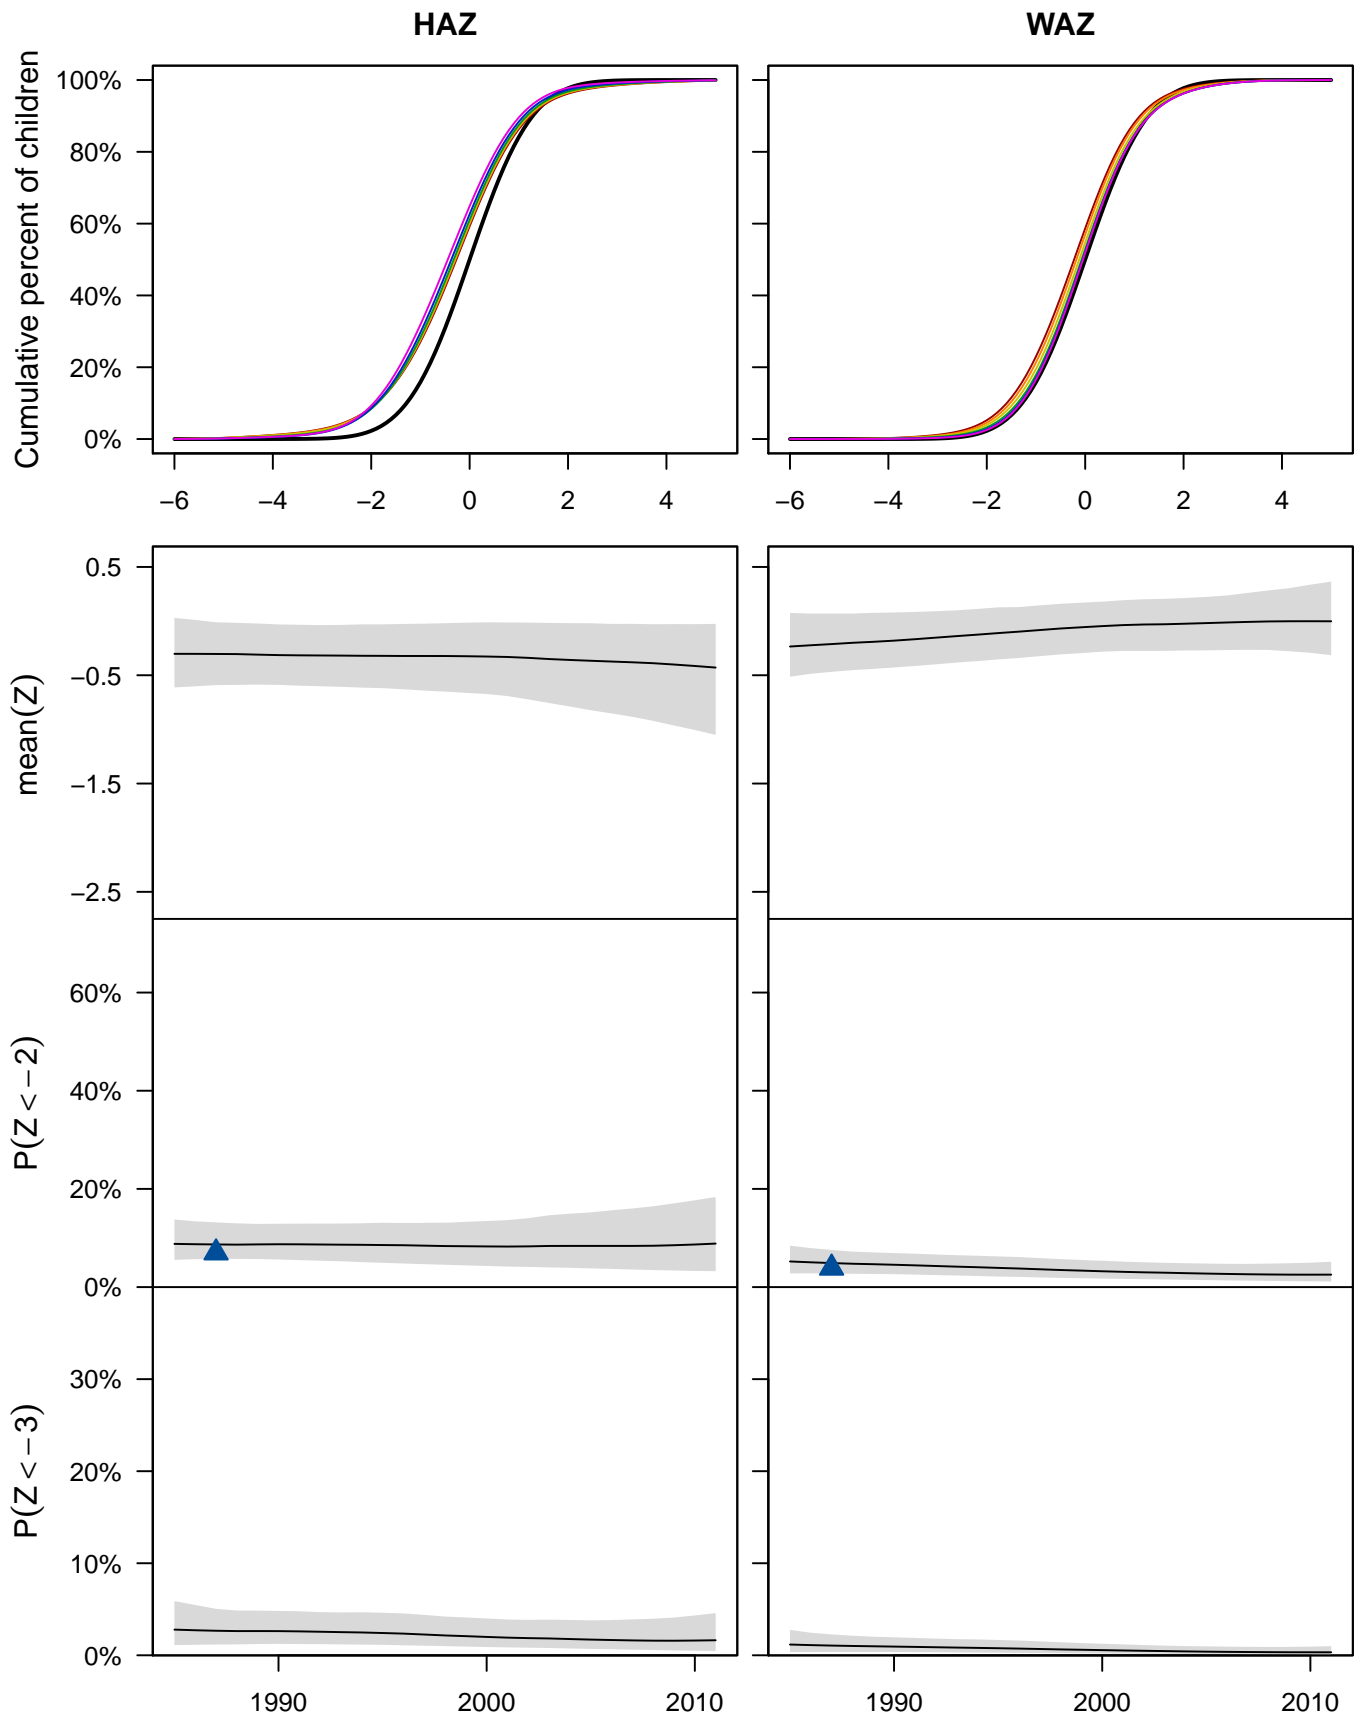

# Viet Nam

East and Southeast Asia Region

HAZ

WAZ

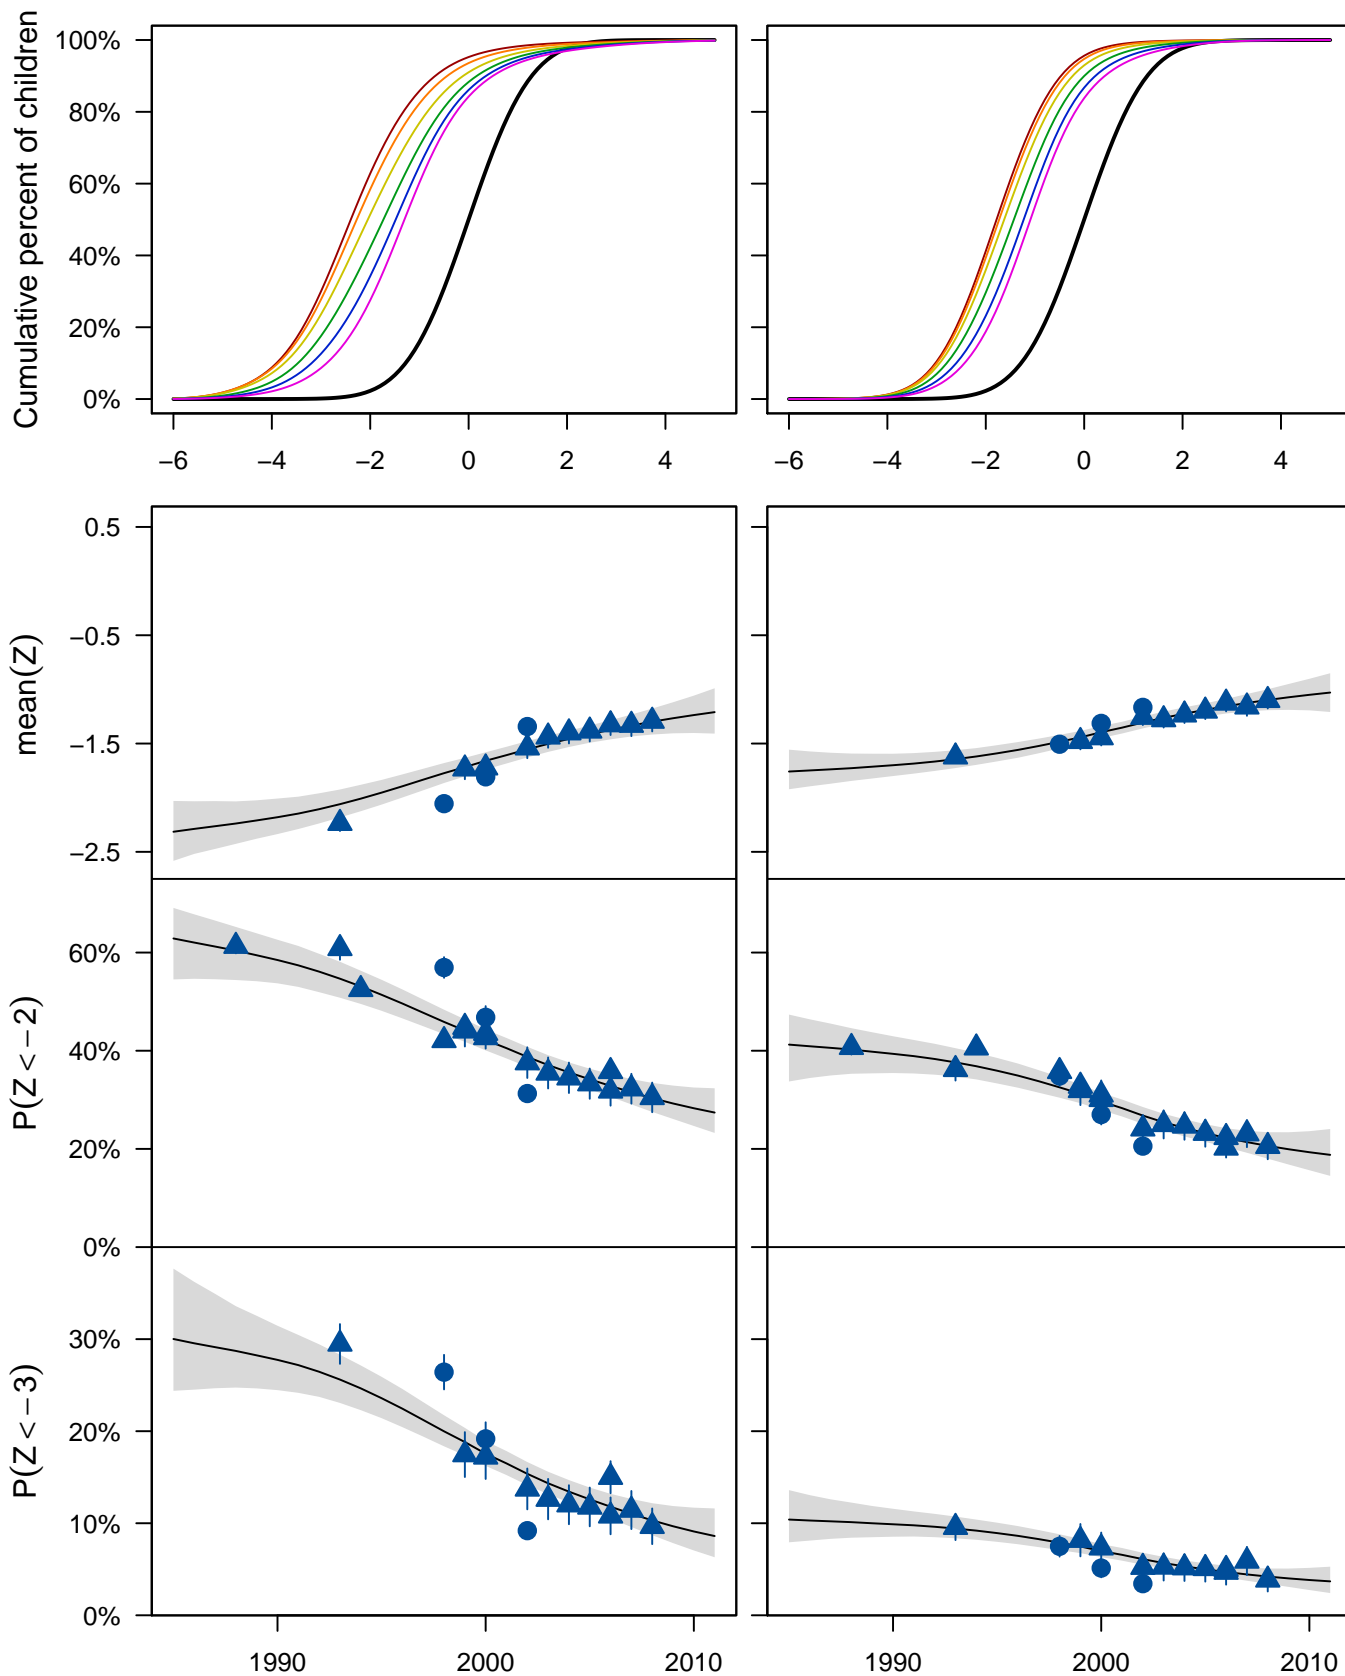

# Yemen

Central Asia, Middle East, and North Africa Region

HAZ

WAZ

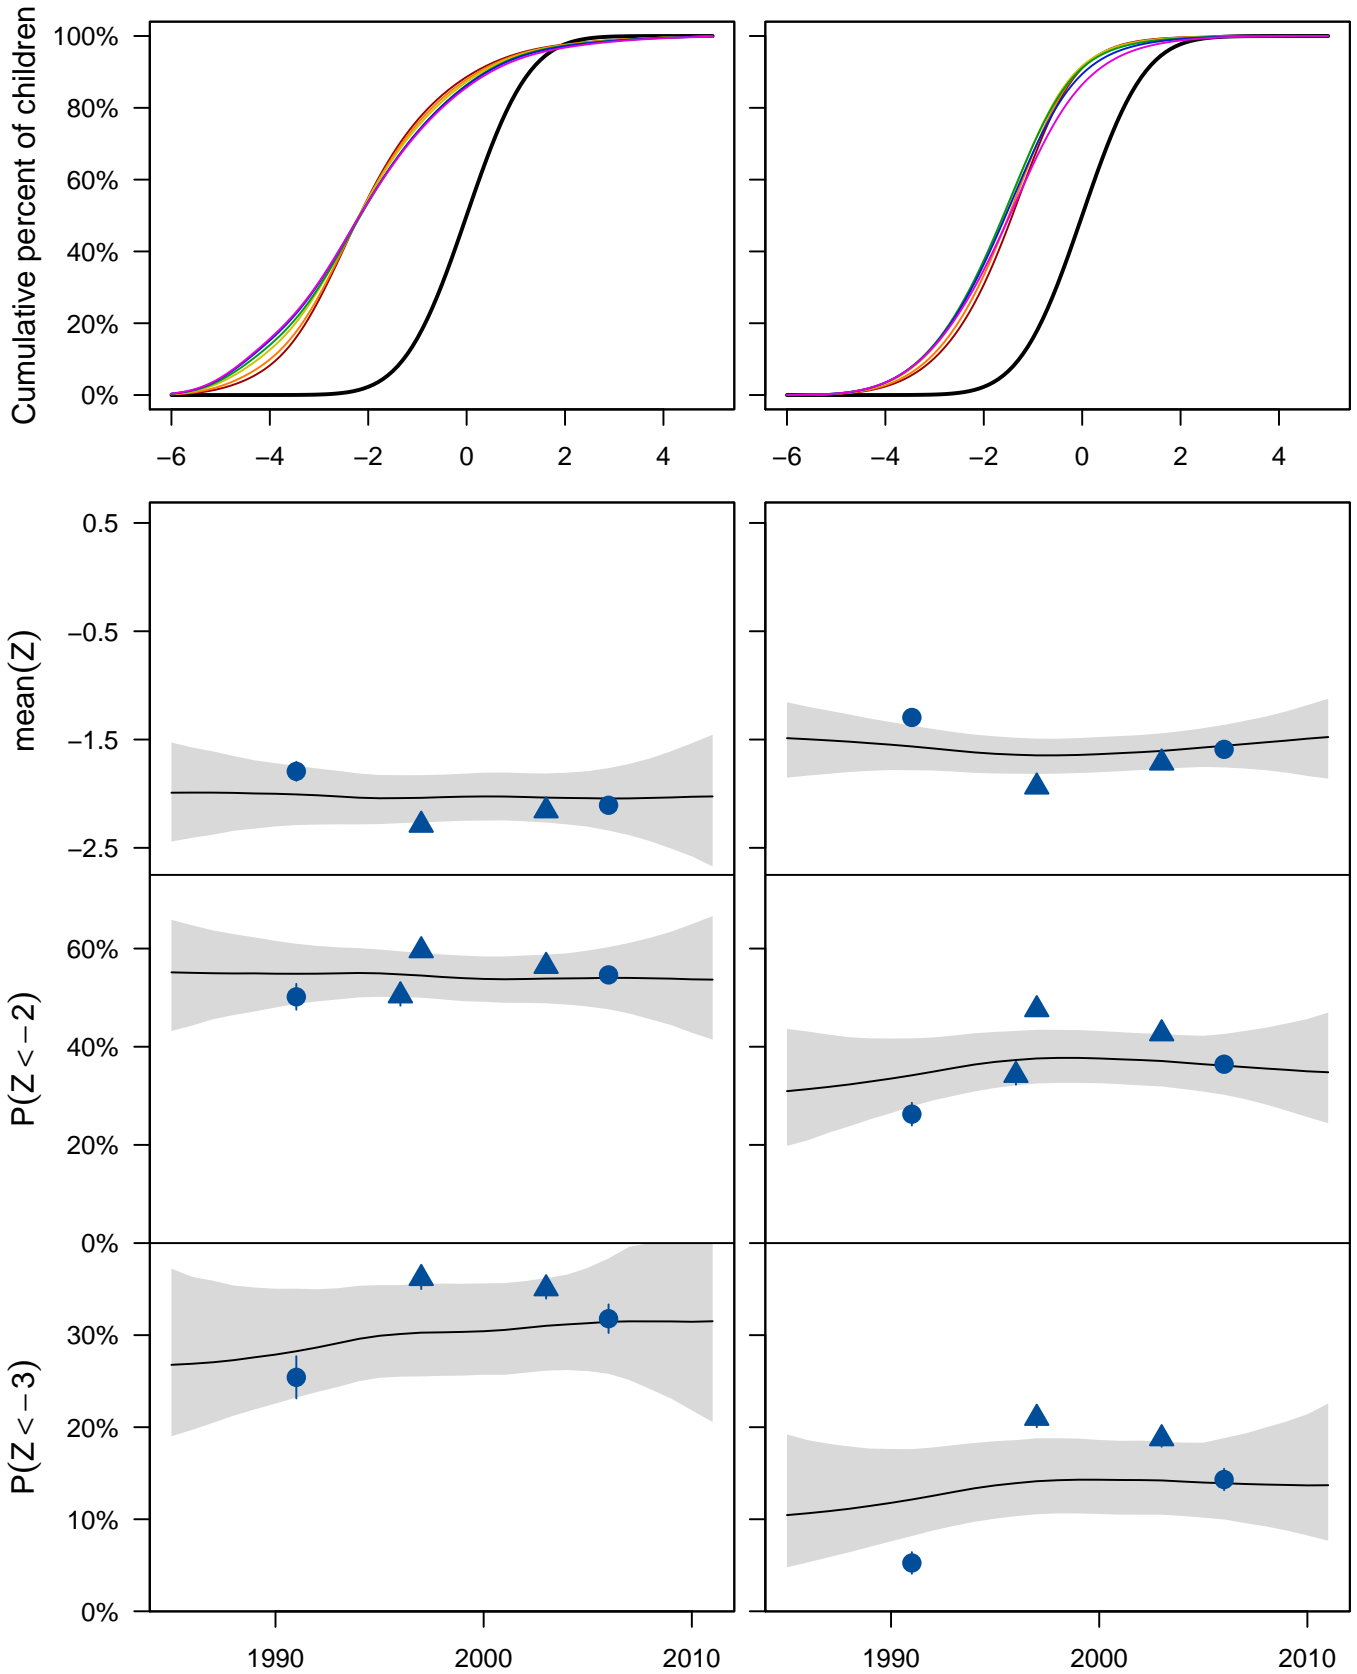

# Zambia

Sub-Saharan Africa Region

HAZ

WAZ

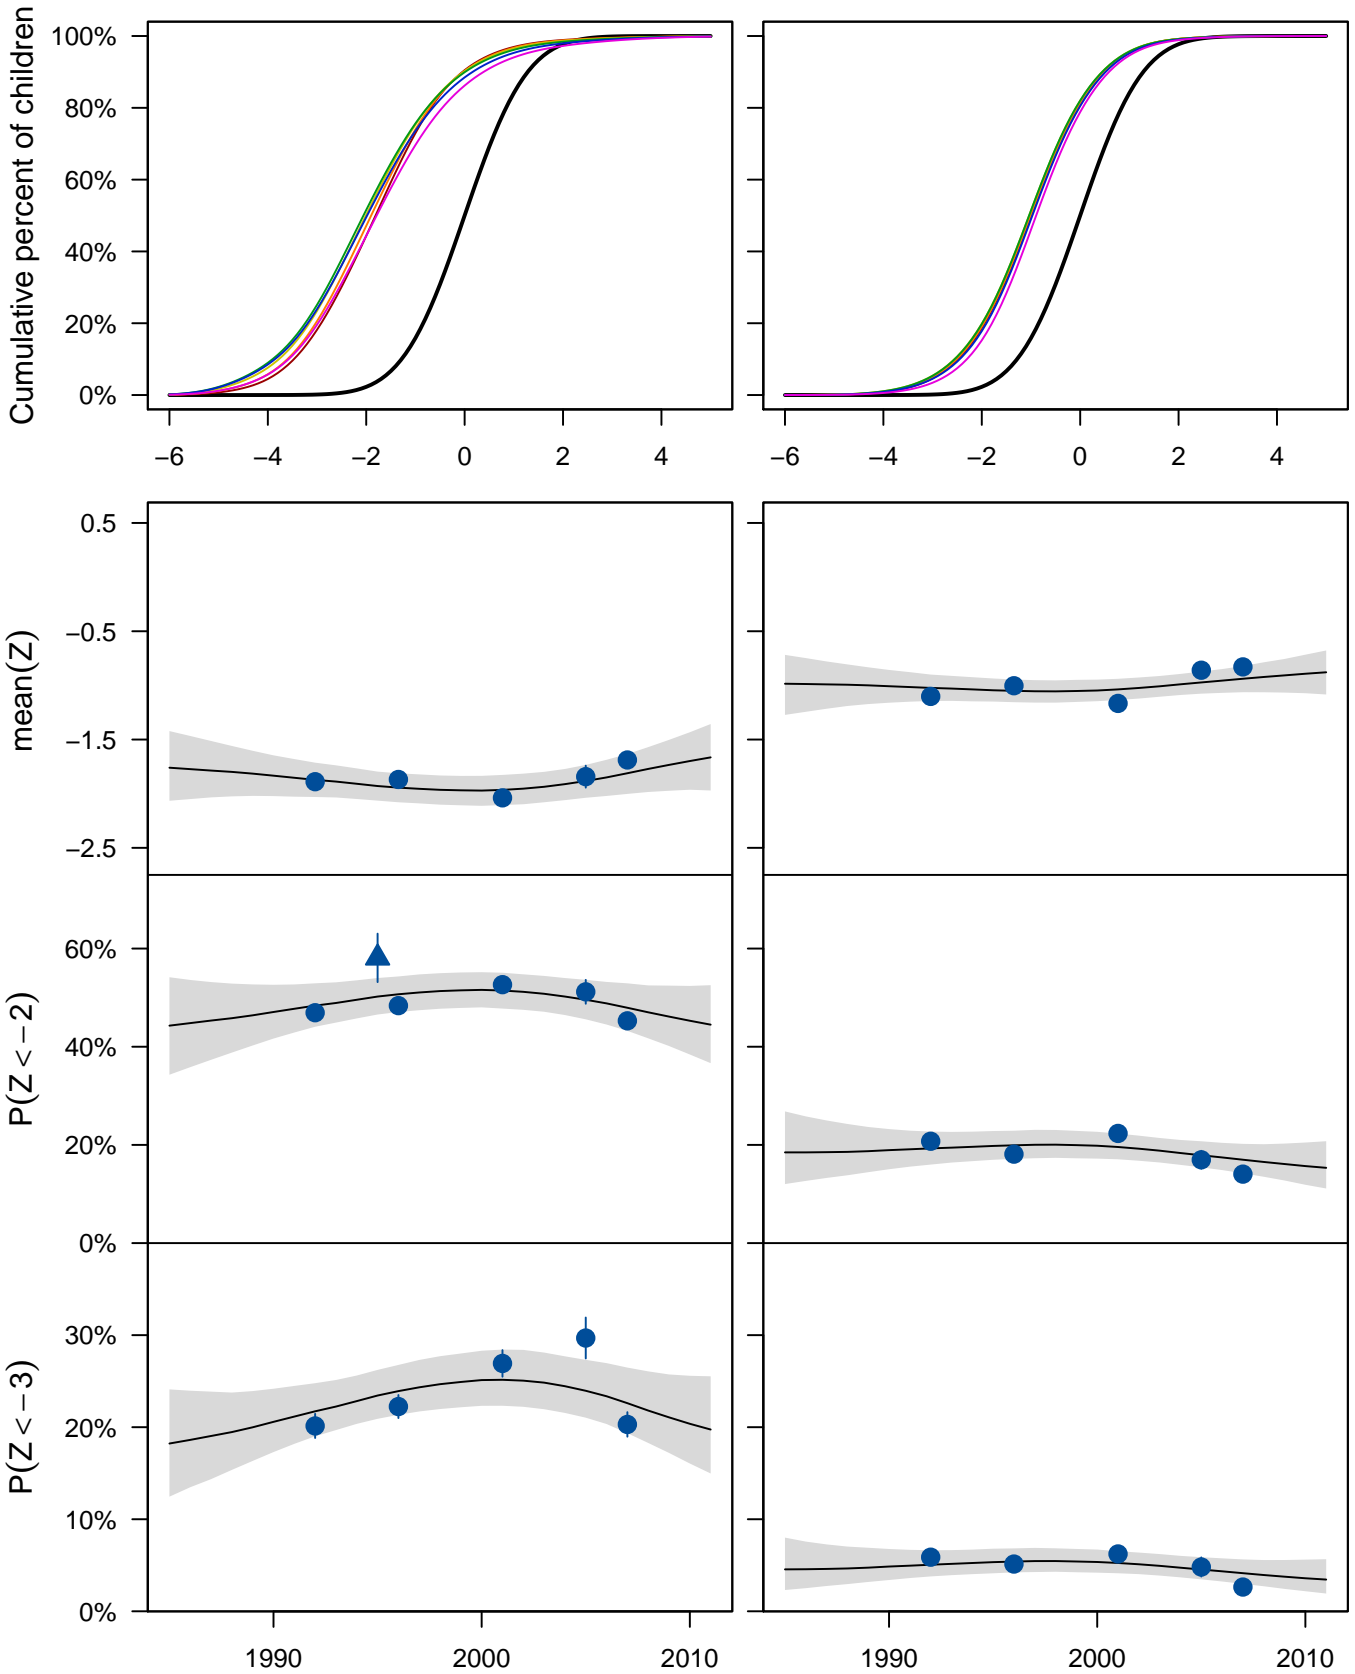

# Zimbabwe

## Sub-Saharan Africa Region

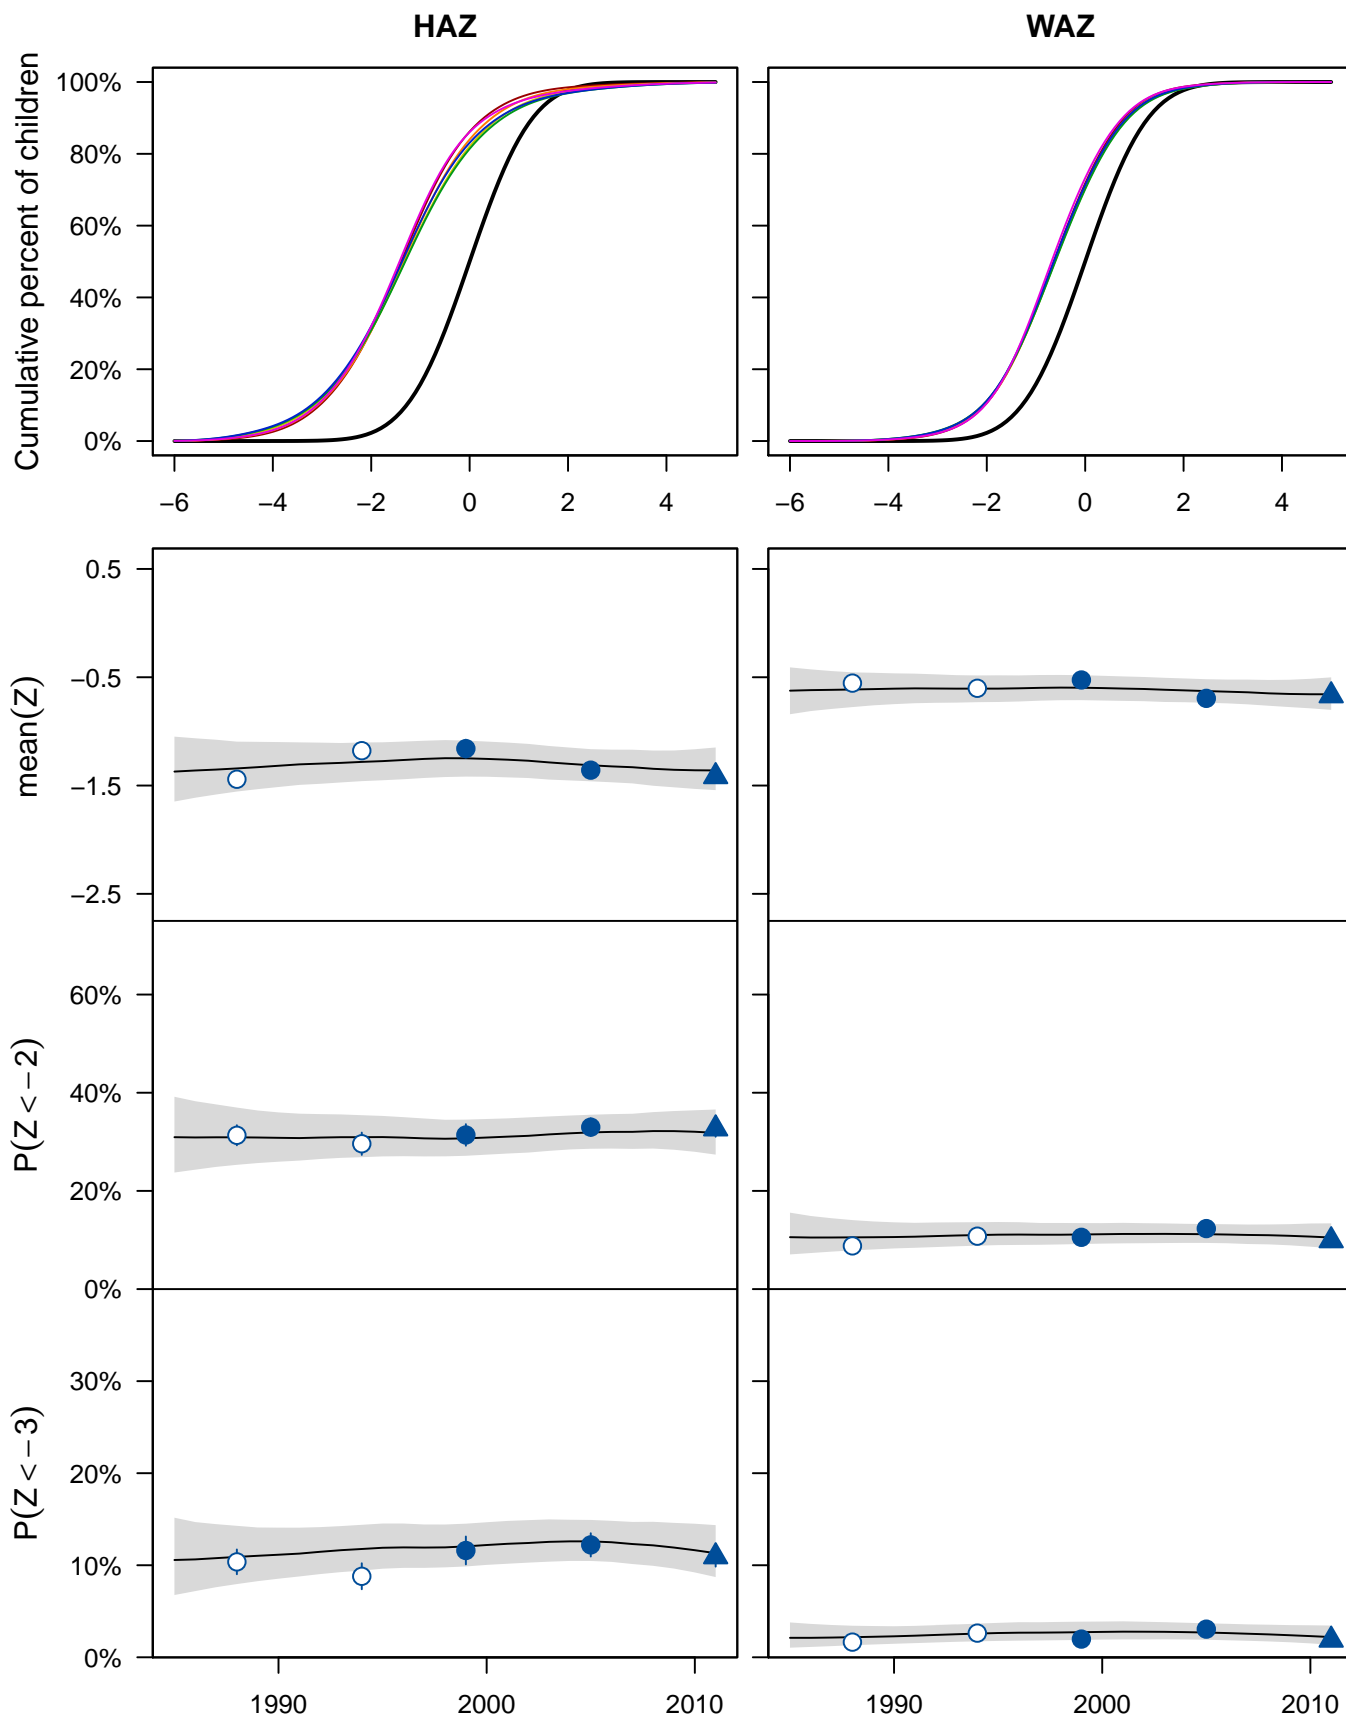



**Webfigure 6: Observed change in the prevalences of stunting and underweight in relation to change expected if the whole distributing had shifted by as much as its median. Each point represents one country. A point below the diagonal line is one in which prevalence decreased by more than expected due to median shift (i.e. shrinking inequality) and a point above the diagonal line is one in which prevalence decreased by less than expected due to median shift (i.e. rising inequality).**

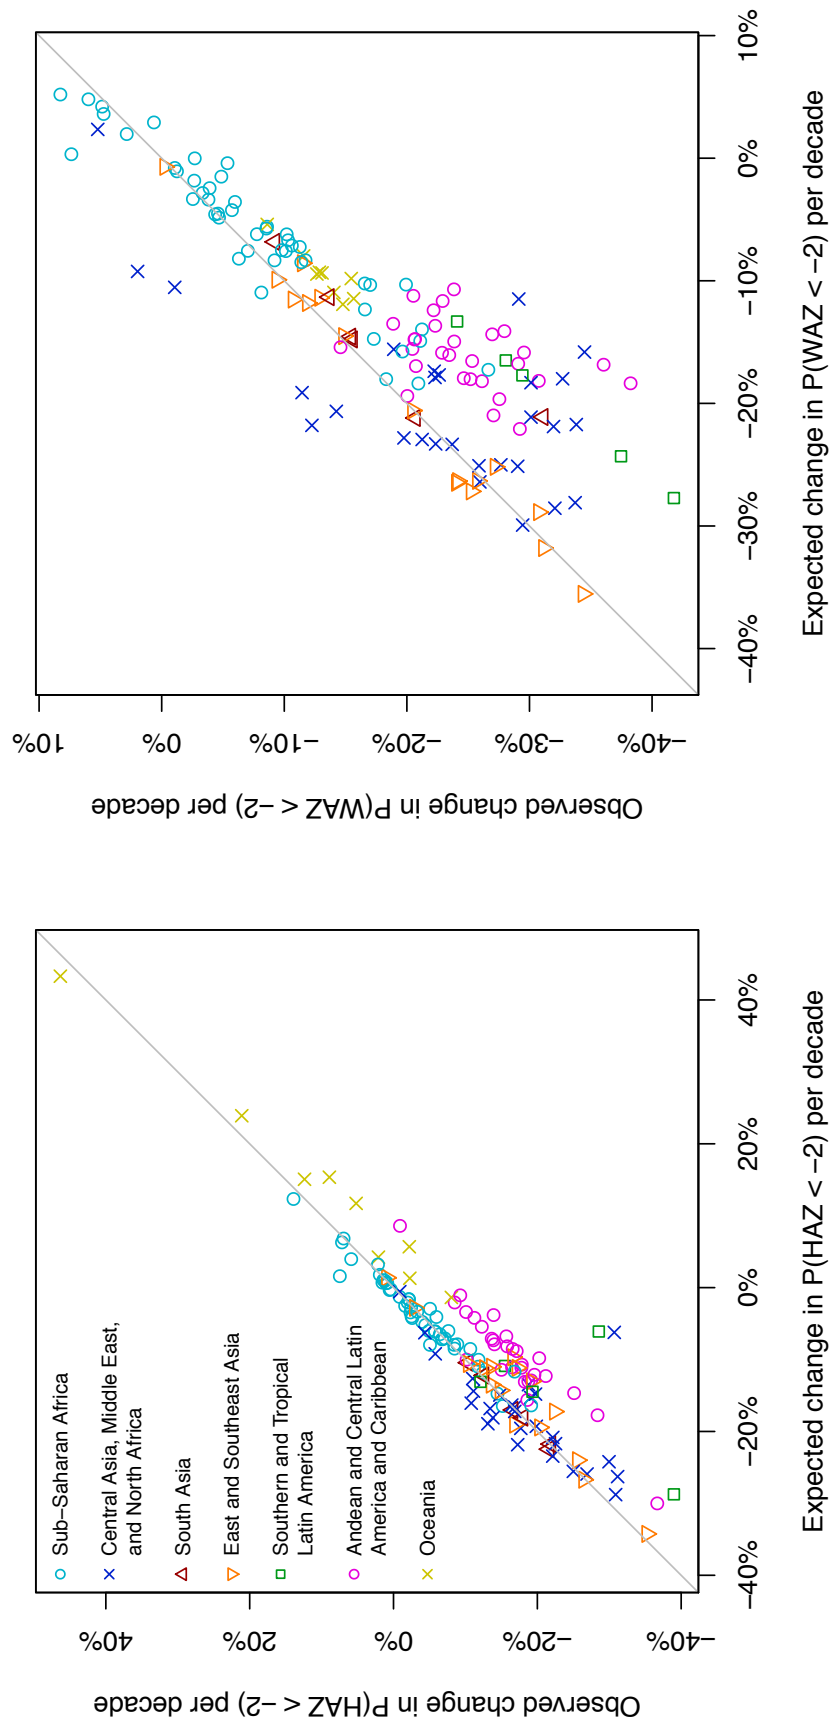

**Webfigure 7: Change in country HAZ and WAZ mean and prevalences between 1985 and 2011 in relation to uncertainty of the estimated change. The shaded areas roughly represent the following ranges of posterior probability (PP) of an estimated increase or decrease being a true increase or decrease:  $PP > 0.975$  (A);  $0.95 < PP < 0.975$  (B);  $0.75 < PP < 0.95$  (C); and  $PP < 0.75$  (D).**

- Sub-Saharan Africa
- × Central Asia, Middle East, and North Africa
- △ South Asia
- ▽ East and Southeast Asia
- Southern and Tropical Latin America
- Andean and Central Latin America and Caribbean
- × Oceania
- All developing countries

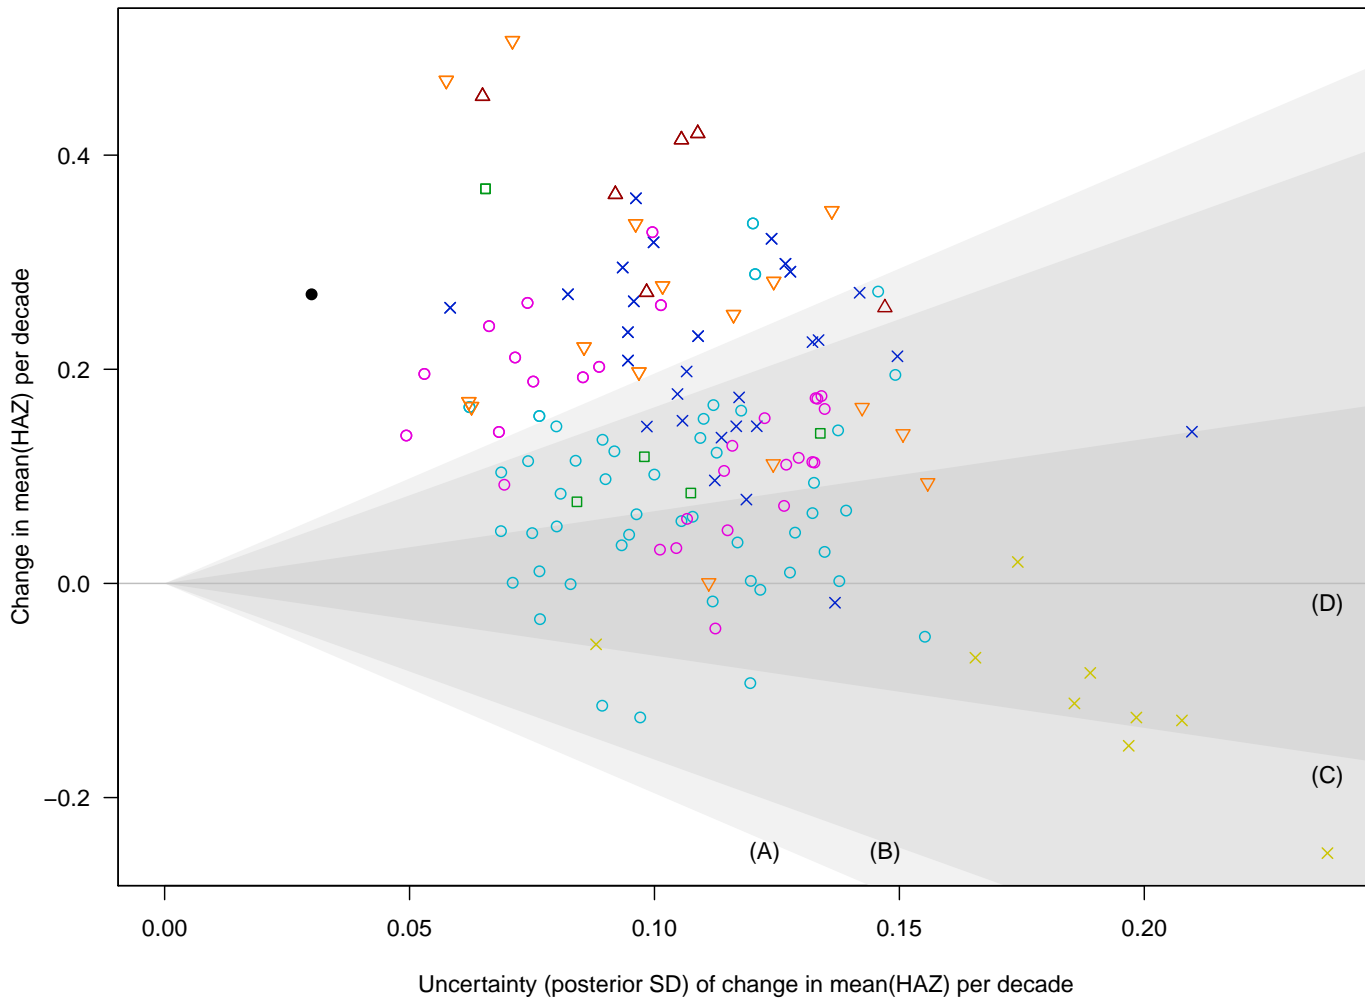

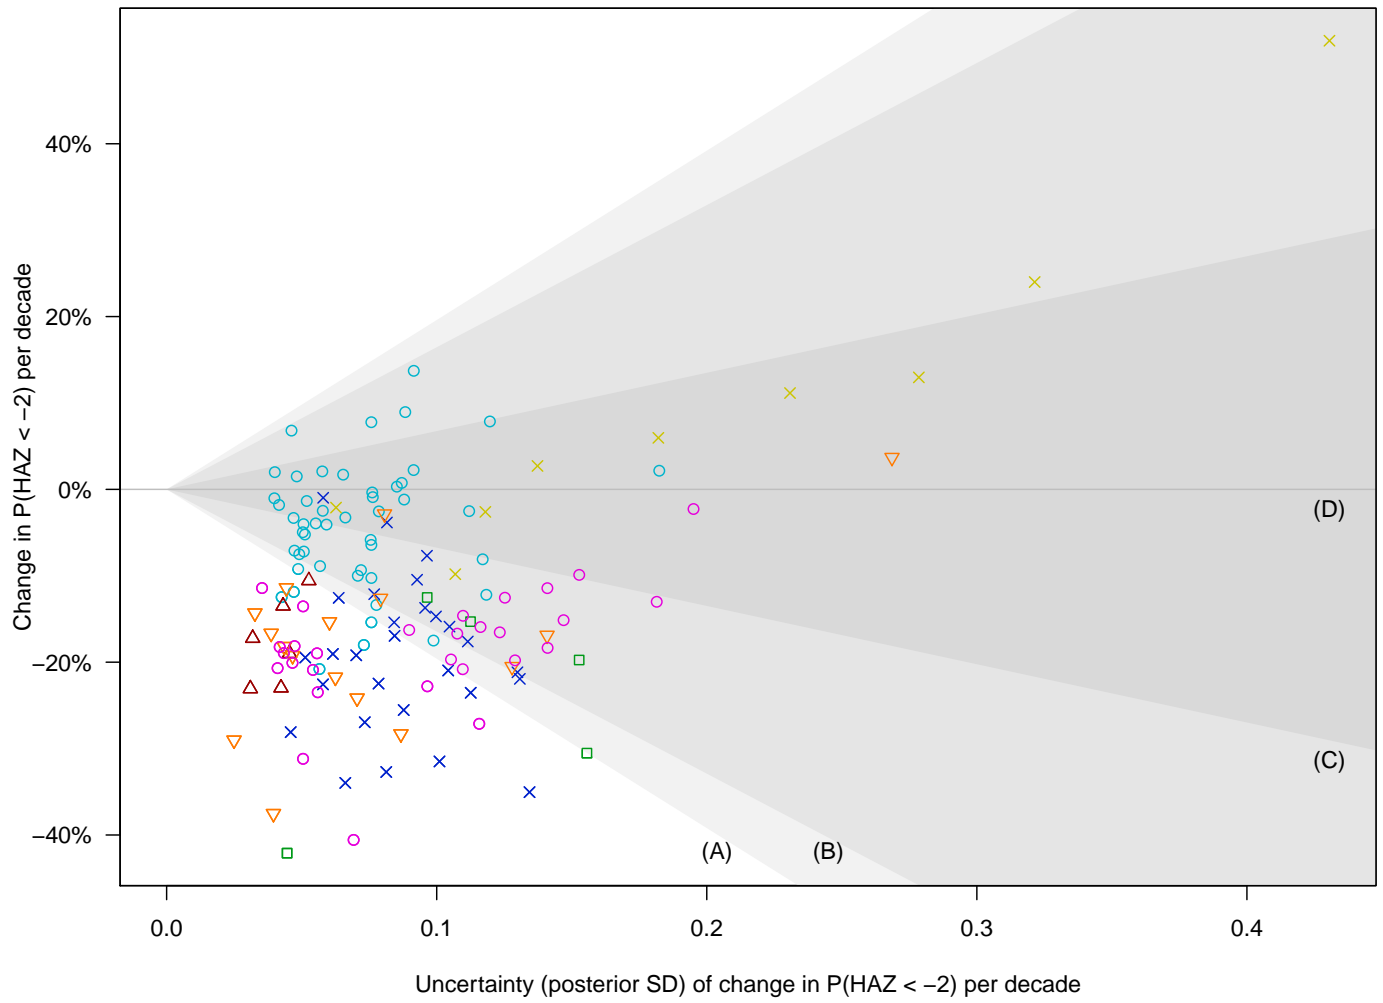

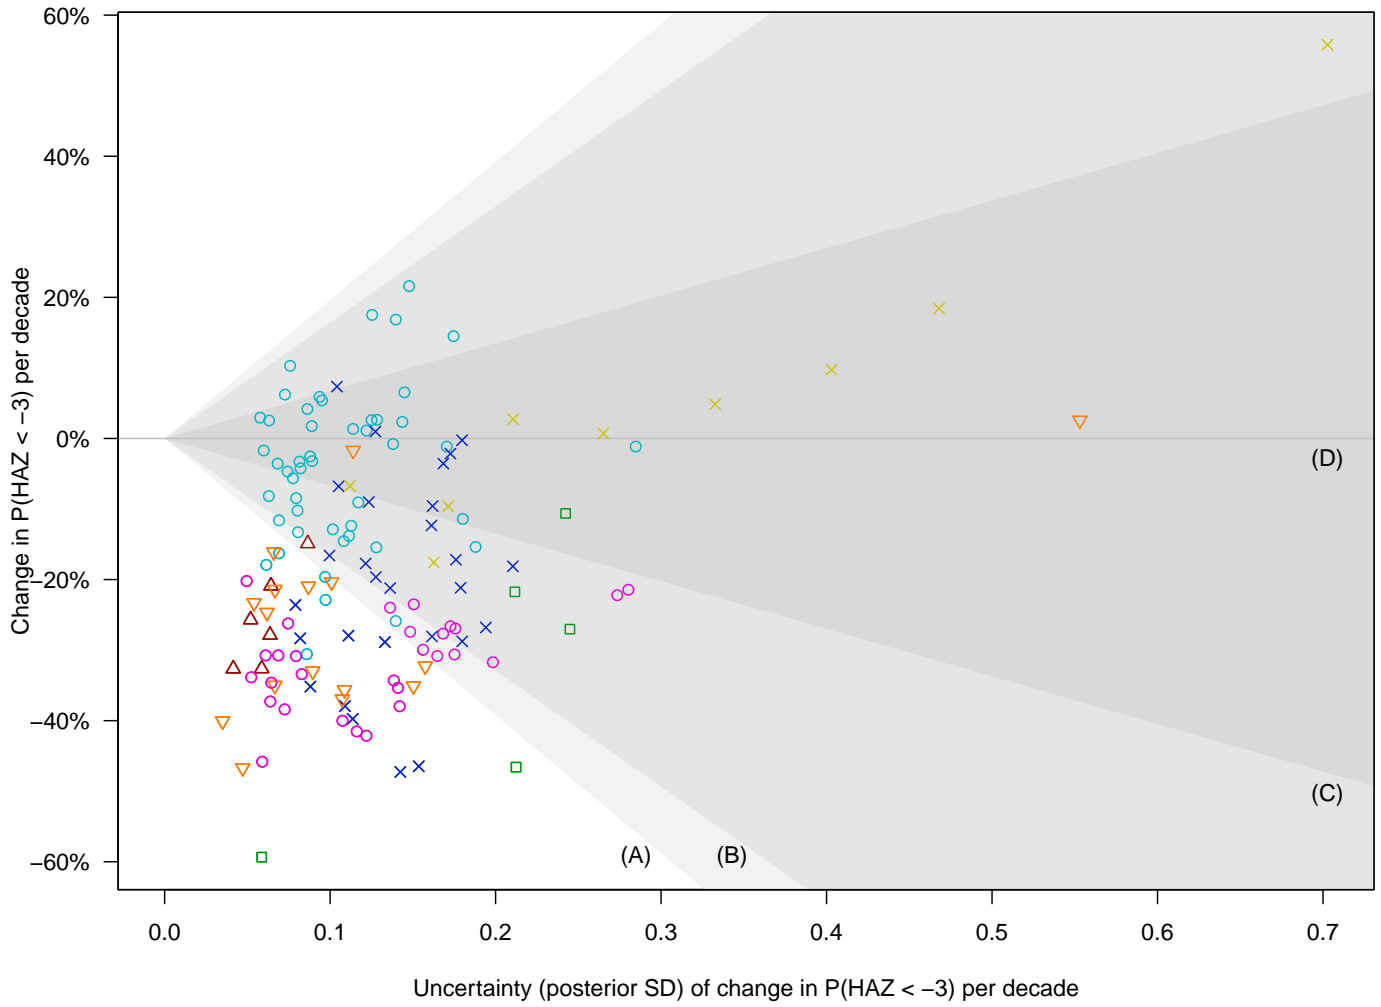

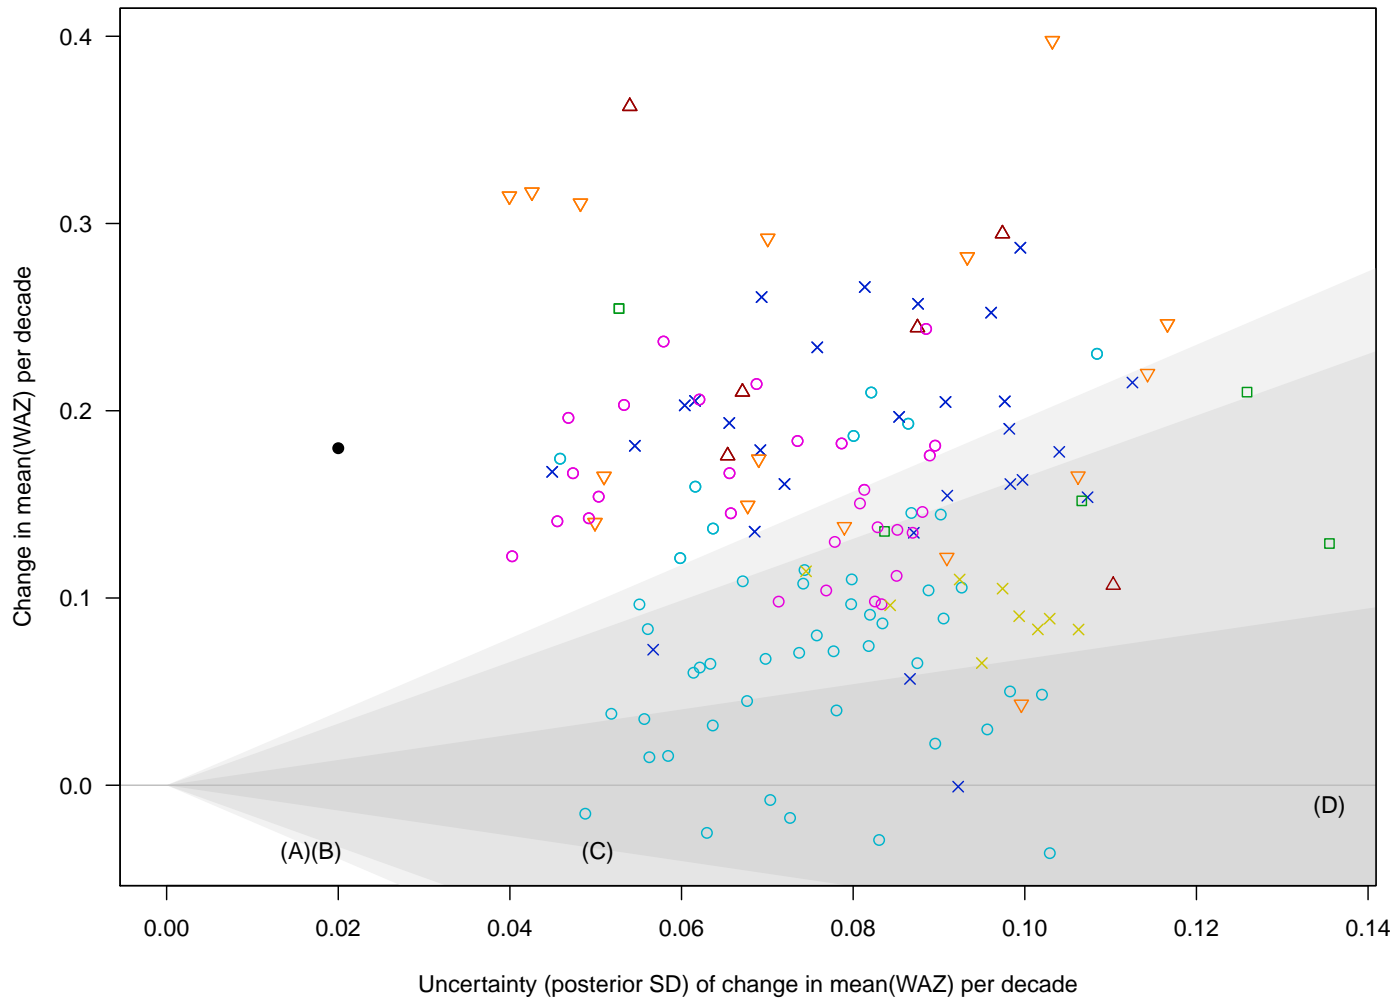

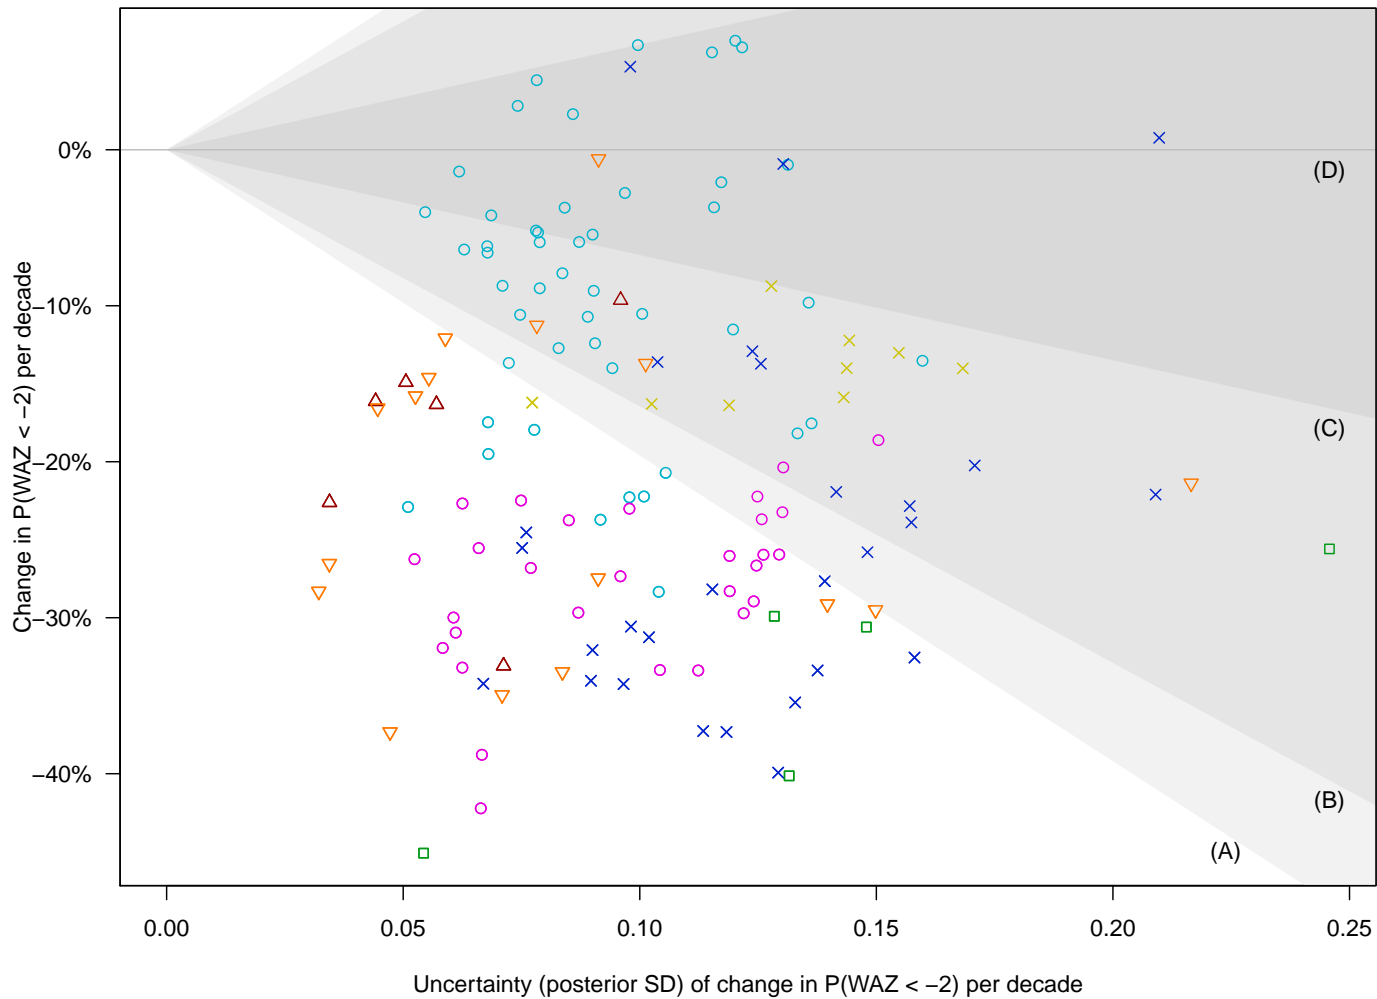

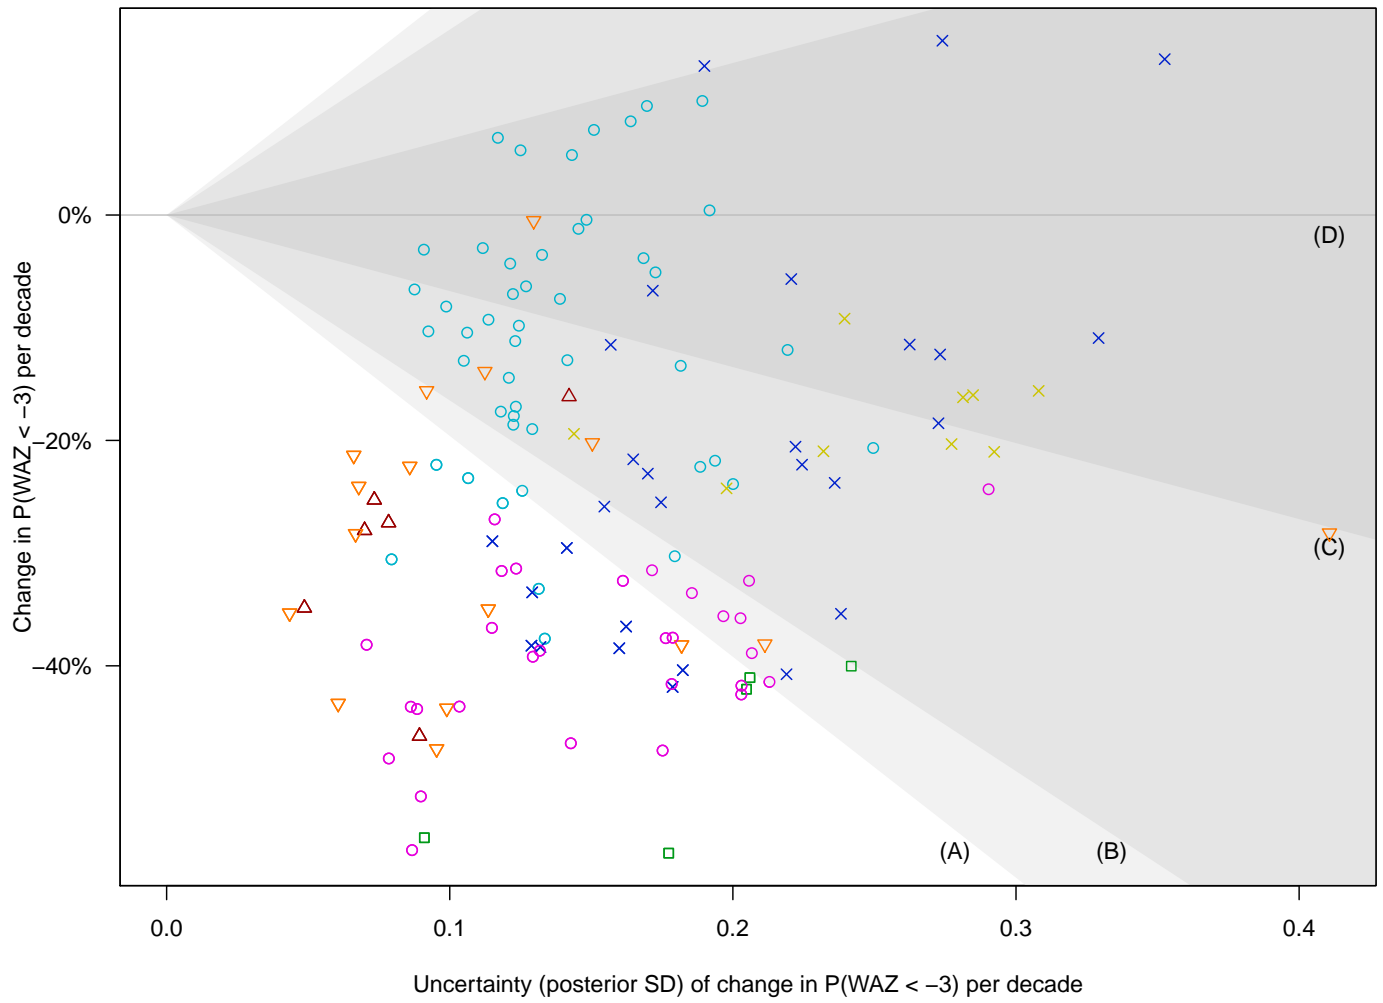

Supplement: mmc1.pdf [file mmc1.pdf]
