# Supplementary material
Source: PubMed Central journal article supplement (PMC3443900)
Supplement: mmc2.pdf [file mmc2.pdf]

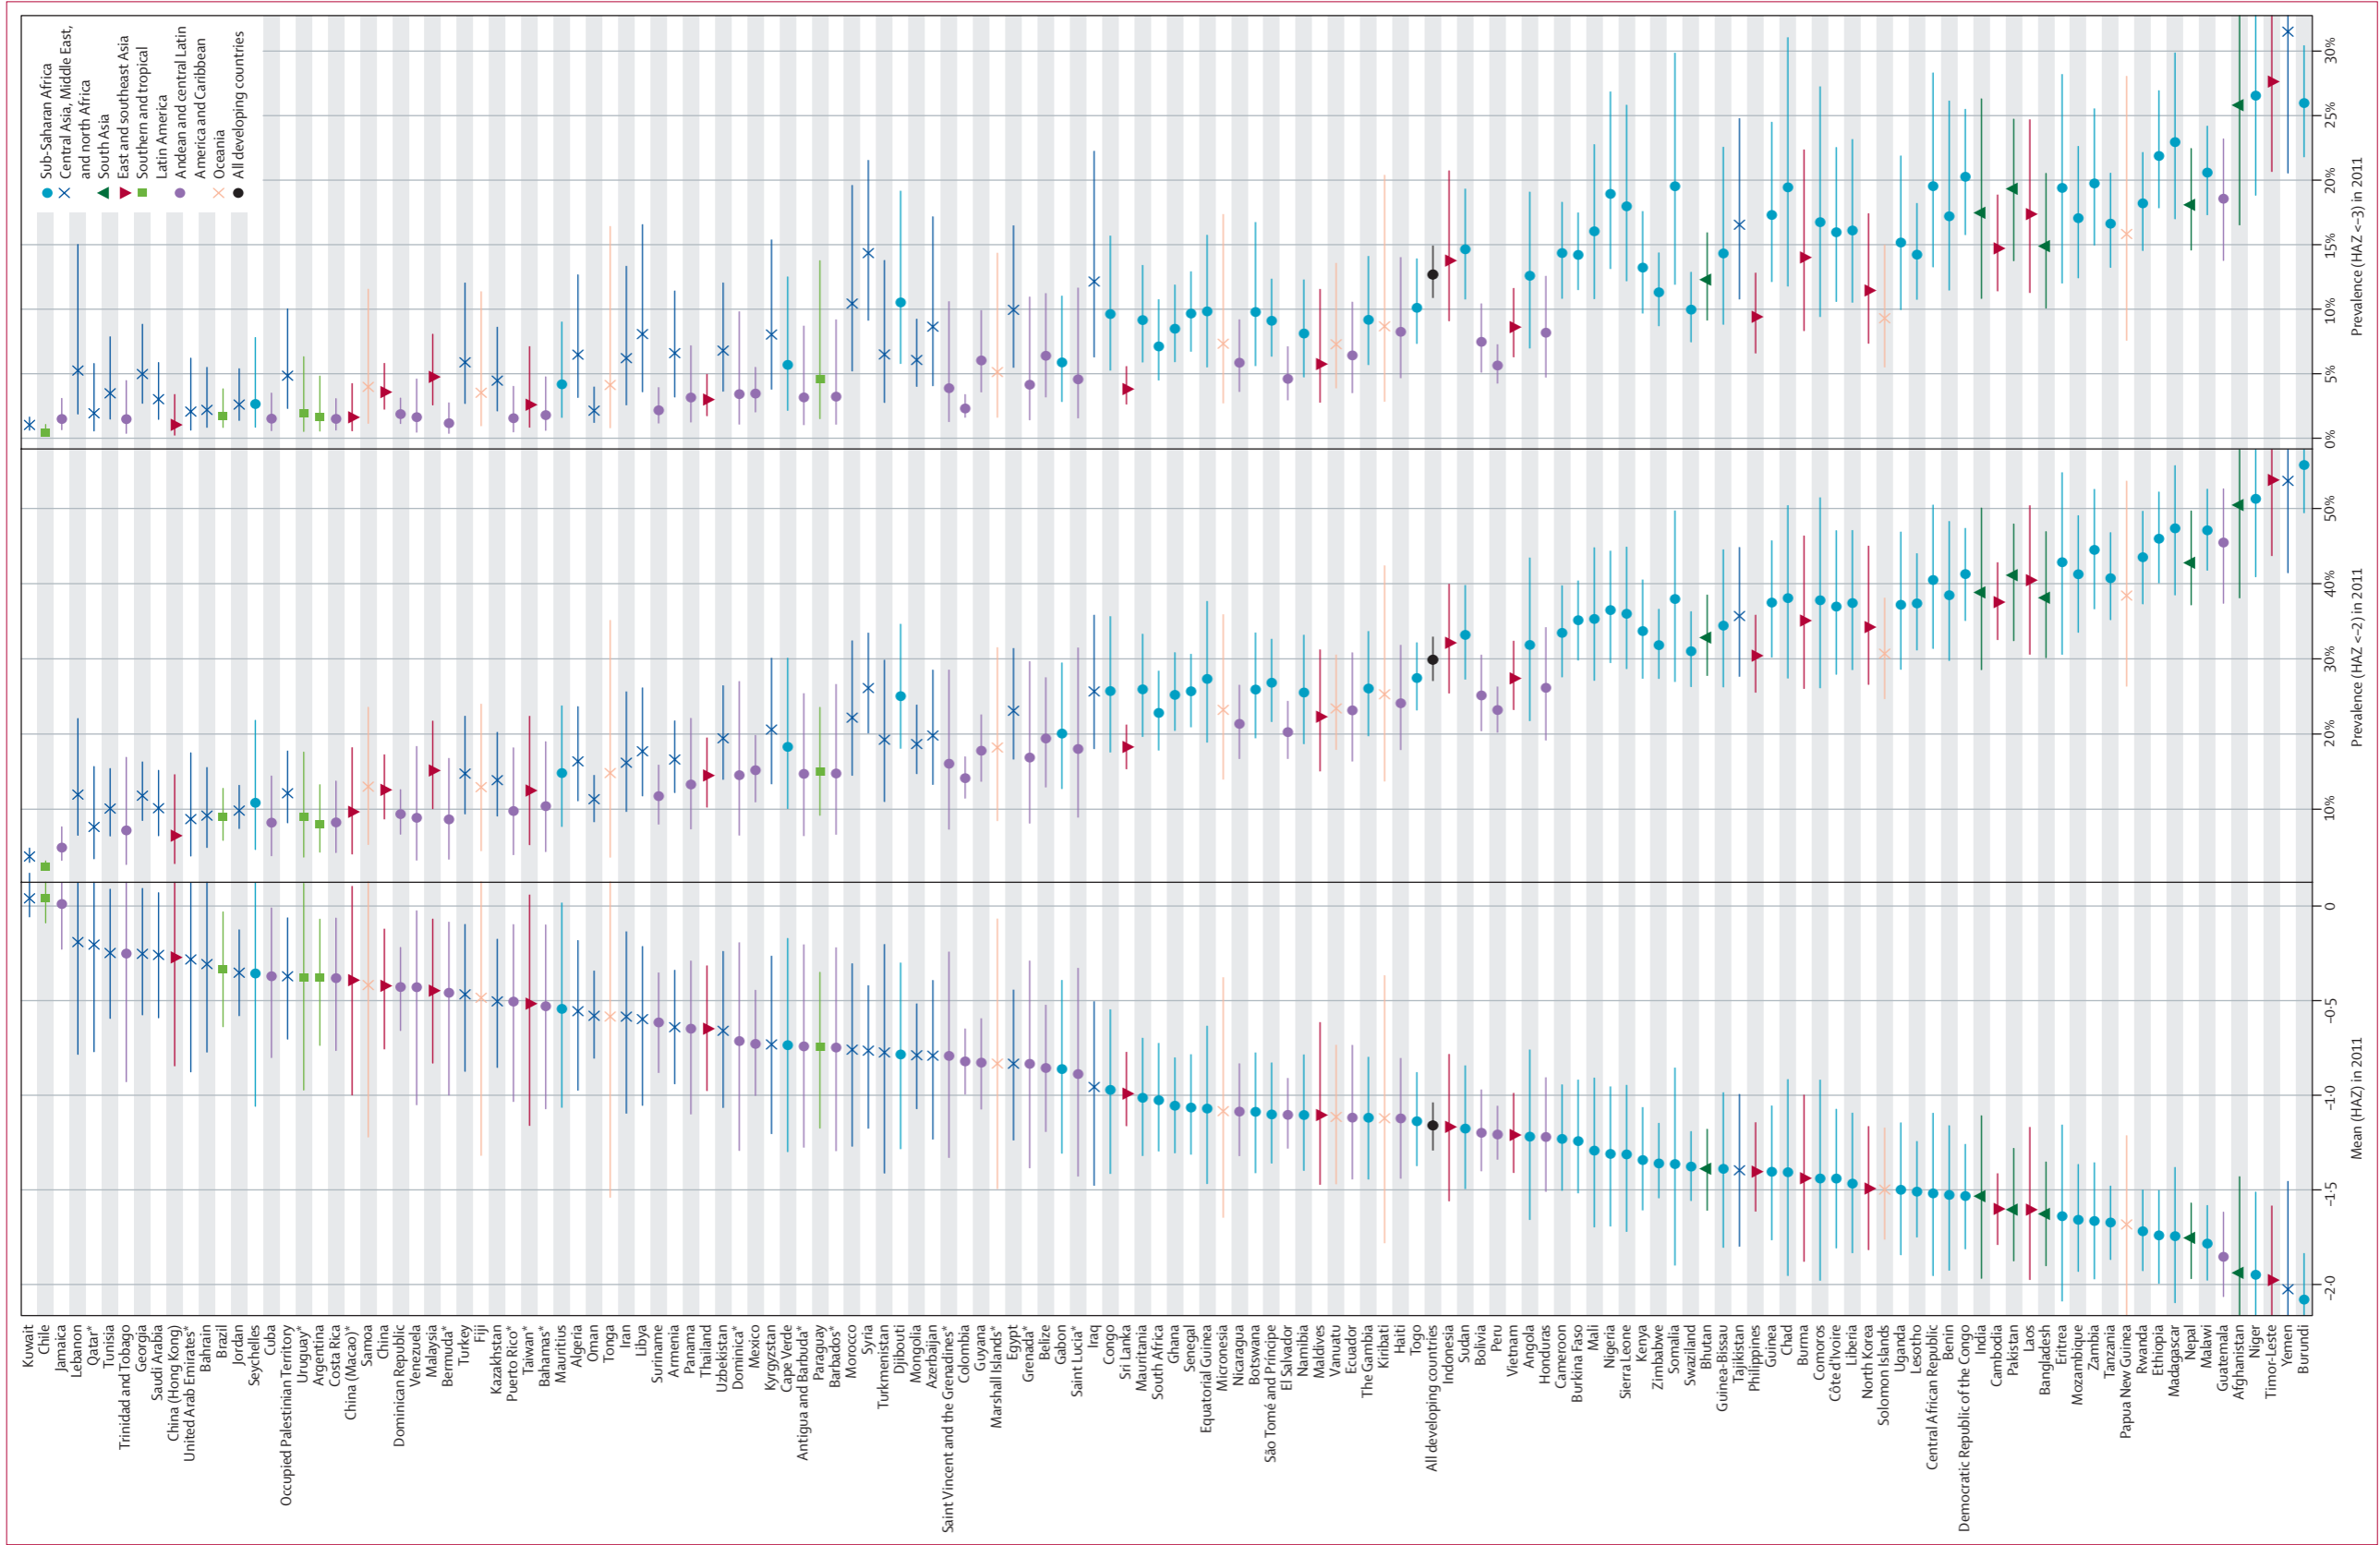

**Figure appendix 1: Stevens GA, Finucane MM, Paciorek CJ, et al on behalf of Nutrition Impact Model Study Group (Child Growth). HAZ means and prevalences by country in 2011**  
 Countries are ordered in the order of their means. The appendix presents the 1985 estimates (pp 88-89) and trends by country (pp 90-231). Prevalence of children with Z scores below -2 includes all children below this cutoff, including those below -3. HAZ=height-for-age Z score. \*Countries with no data for which the estimates are based on data in all other countries and on the country-specific covariates that are used in the model.

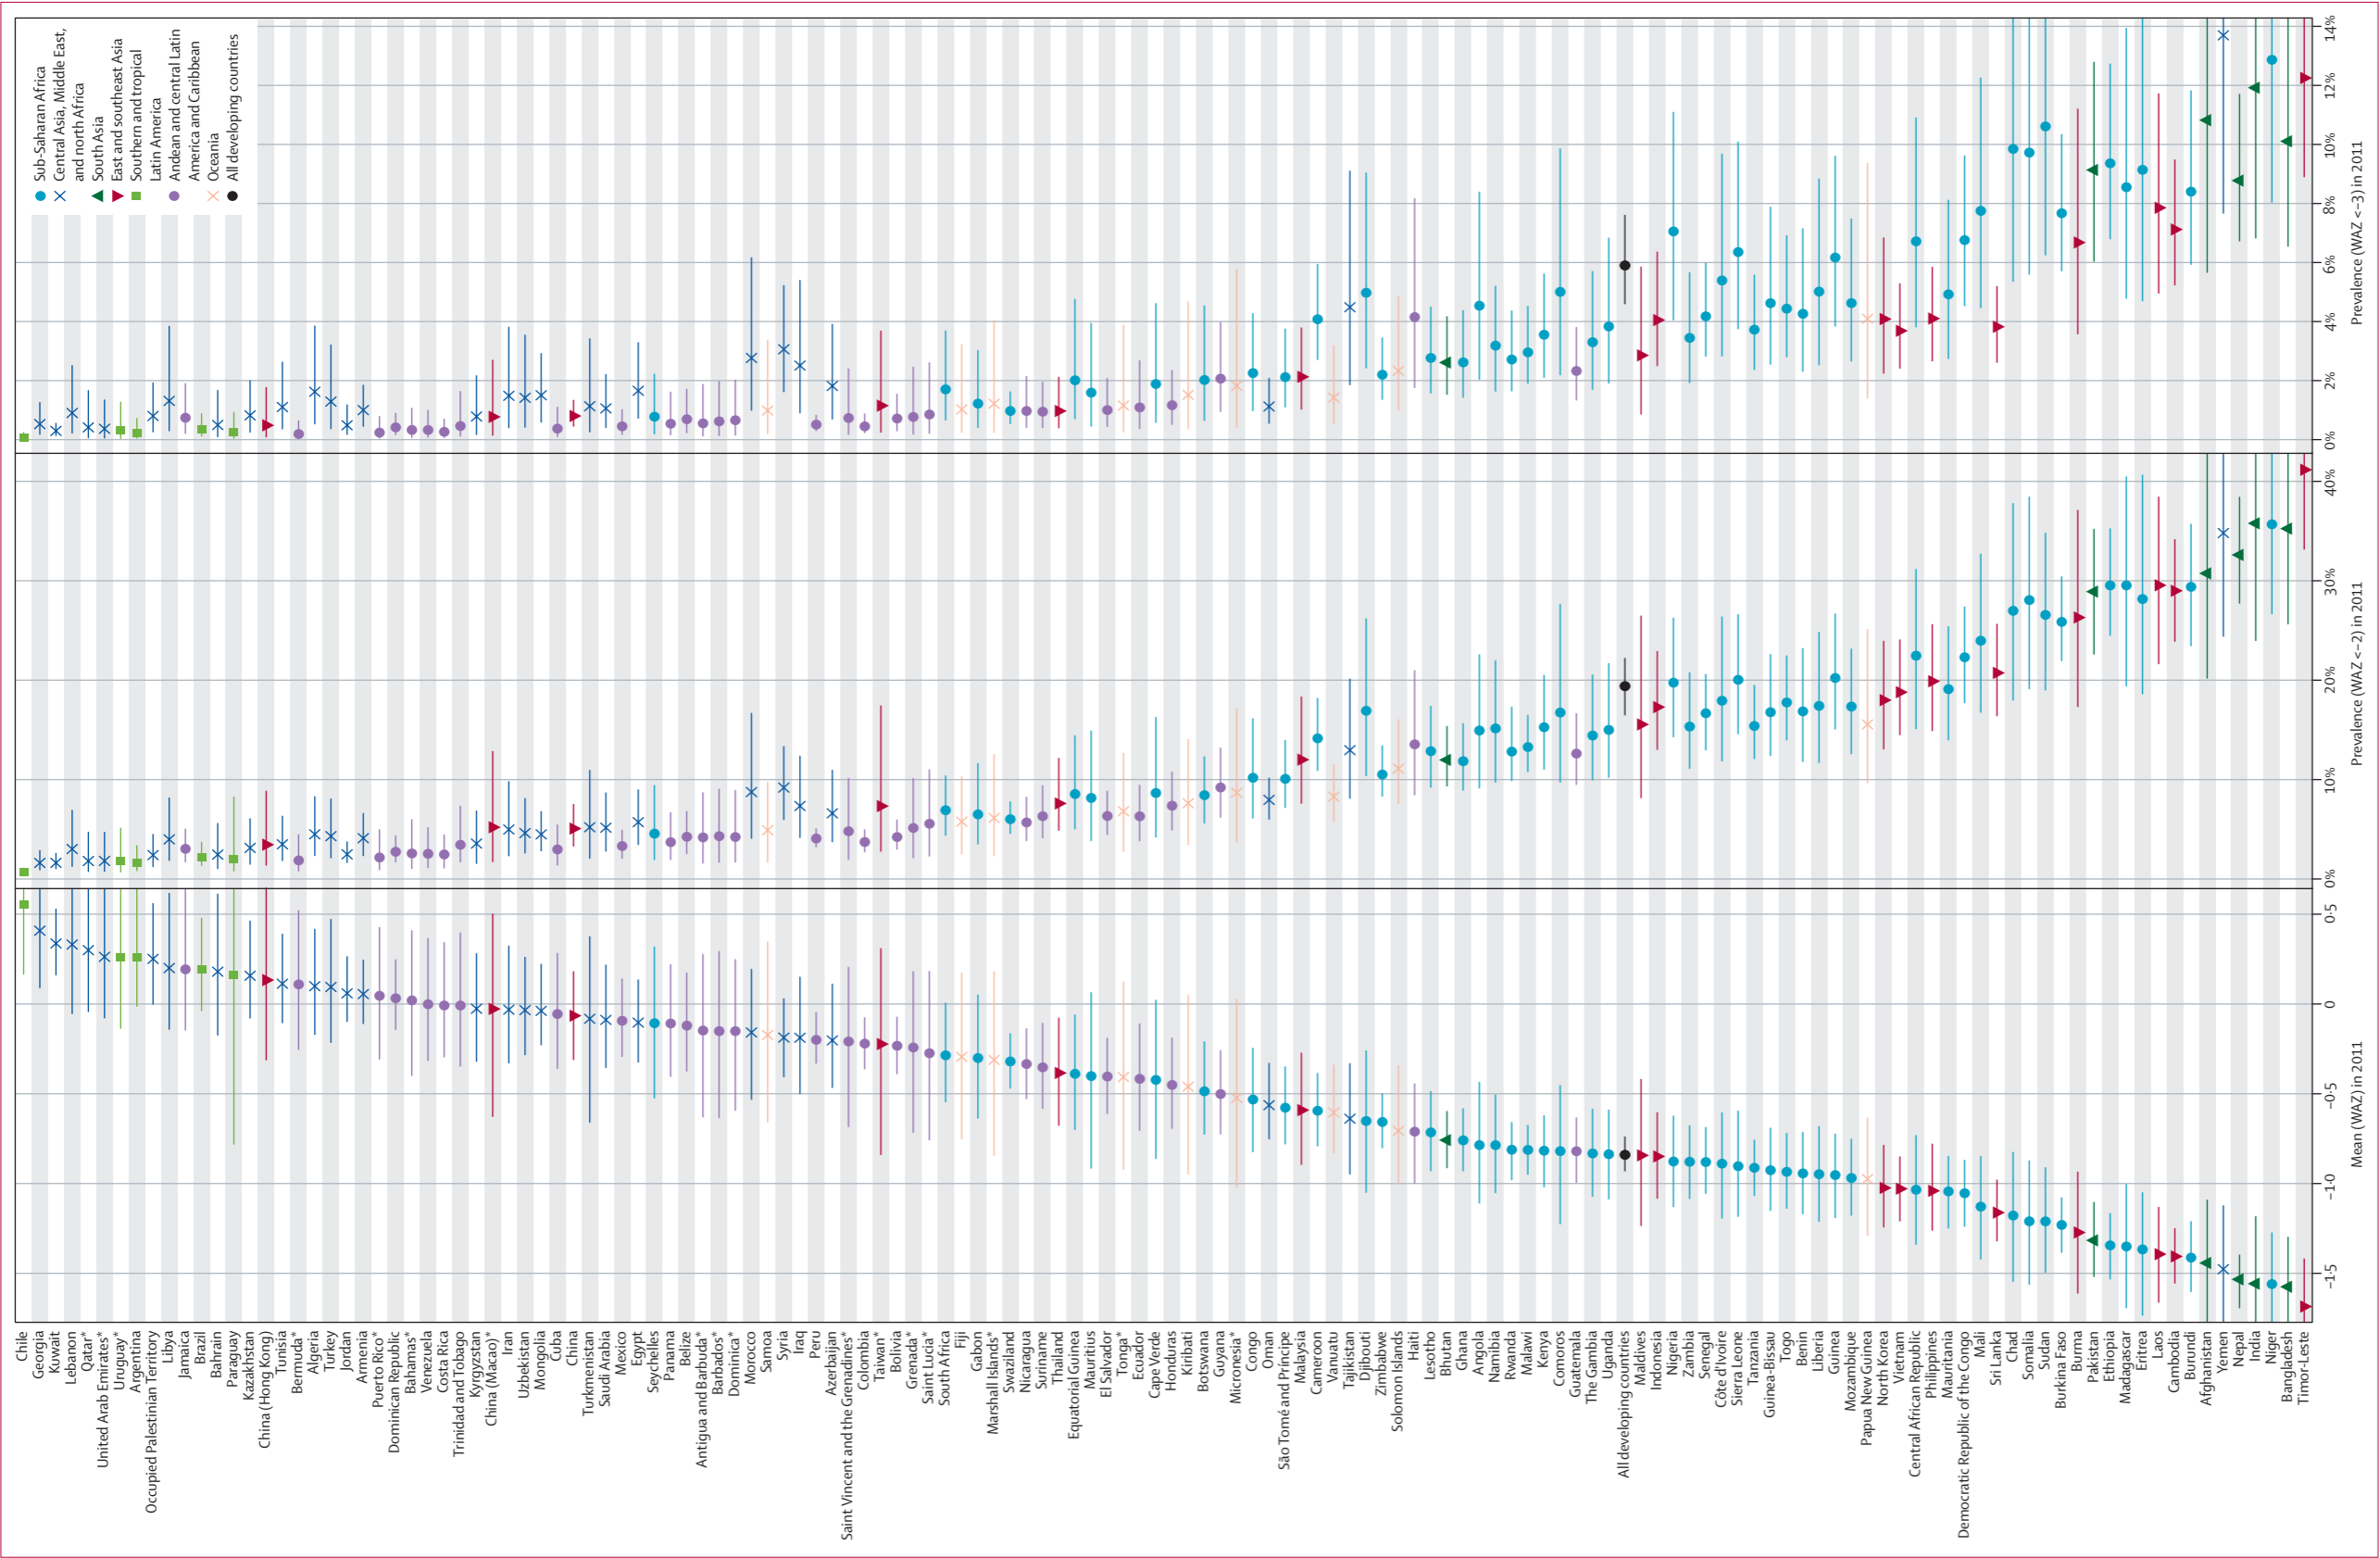

**Figure appendix 2: Stevens GA, Finucane MM, Paciorek CJ, et al on behalf of Nutrition Impact Model Study Group (Child Growth). WAZ means and prevalences by country in 2011**  
 Countries are ordered in the order of their means. The appendix presents the 1985 estimates (pp 88–89) and trends by country (pp 90–231). Prevalence of children with Z scores below -2 includes all children below this cutoff, including those below -3. WAZ=weight-for-age Z score. \*Countries with no data for which the estimates are based on data in all other countries and on the country-specific covariates that are used in the model.
